# Supplementary material for: Halogen Bonding in Sulphonamide Co-Crystals: X···π Preferred over X···O/N?
Source: MDPI journal article supplement (doi:10.3390/molecules28155910), 2023-08-06
Supplement: s1 [file s1]

## **Table of Contents**

|                                                             |   |
|-------------------------------------------------------------|---|
| Lists of Hydrogen bonds and halogen bonds in structures 1-7 | 2 |
| Lists of PXRDs for Structures 1-7                           | 5 |
| List of CSD Search Parameters                               | 9 |

## Lists of Hydrogen bonds and halogen bonds in structures 1-7

### NMBSA-14DITFB (1:1), 1

Table S1: Hydrogen-bond geometry for NMBSA-14DITFB (1:1), 1.

| D—H...A                    | D—H [Å] | d(H...A) [Å] | D(D...A) [Å] | ∠(D—H...A) [°] |
|----------------------------|---------|--------------|--------------|----------------|
| C6—H6...O1 <sup>i</sup>    | 0.95    | 2.59         | 3.284(9)     | 130            |
| C7—H7B...F4 <sup>ii</sup>  | 0.98    | 2.58         | 3.474(9)     | 153            |
| C7—H7C...O2 <sup>iii</sup> | 0.98    | 2.60         | 3.287(9)     | 127            |
| N1—H1...S1 <sup>ii</sup>   | 0.89(3) | 2.91(7)      | 3.726(6)     | 153(12)        |
| N1—H1...O2 <sup>ii</sup>   | 0.89(3) | 2.14(5)      | 3.009(7)     | 164(14)        |

Symmetry codes: (i) x, y+1, z; (ii) x-1/2, -y+3/2, z; (iii) x-1/2, -y+5/2, z

Table S2: Halogen-bond geometry for NMBSA-14DITFB (1:1), 1.

| C—X...A                  | d(X...A) [Å] | ∠(C—X...A) [°] |
|--------------------------|--------------|----------------|
| C8—I1...N1               | 3.057(6)     | 179.8(2)       |
| C11—I2...C3 <sup>i</sup> | 3.515(9)     | 173.6(2)       |
| C11—I2...C4 <sup>i</sup> | 3.476(9)     | 161.6(2)       |

Symmetry code: (i) 1-x, 1-y, 1/2+z

### NPMSA-14DITFB (1:1), 2

Table S3: Hydrogen-bond geometry for NPMSA-14DITFB (1:1), 2.

| D—H...A                  | D—H [Å] | d(H...A) [Å] | D(D...A) [Å] | ∠(D—H...A) [°] |
|--------------------------|---------|--------------|--------------|----------------|
| C3—H3...O2               | 0.95    | 2.40         | 3.052(3)     | 126            |
| C1—H1A...O2 <sup>i</sup> | 0.98    | 2.44         | 3.373(4)     | 159            |
| N1—H1...O1 <sup>ii</sup> | 0.79(4) | 2.15(4)      | 2.933(3)     | 169(4)         |

Symmetry codes: (i) x-1, y, z; (ii) -x, -y+1, -z+2

Table S4: Halogen-bond geometry for NPMSA-14DITFB (1:1), 2.

| C—X...A                   | d(X...A) [Å] | ∠(C—X...A) [°] |
|---------------------------|--------------|----------------|
| C8—I1...O1                | 2.994(2)     | 170.02(8)      |
| C8—I1...O2                | 3.496(2)     | 146.26(8)      |
| C8—I1...S1                | 3.6892(7)    | 167.43(7)      |
| C11—I2...C4 <sup>i</sup>  | 3.440(3)     | 172.08(9)      |
| C11—I2...C5 <sup>i</sup>  | 3.557(3)     | 162.06(9)      |
| C11—I2...cg <sup>i</sup>  | 3.535        | 154.05         |
| C11—I2...F2 <sup>ii</sup> | 3.442(2)     | 114.87(8)      |

Symmetry code: (i) 1.5+x, 1.5-y, 1/2+z; (ii) 3-x, 2-y, 2-z

### NPMSA-14DITFB (2:1), 3

Table S5: Hydrogen-bond geometry for NPMSA-14DITFB (2:1), 3.

| D—H...A                 | D—H [Å]  | d(H...A) [Å] | D(D...A) [Å] | ∠(D—H...A) [°] |
|-------------------------|----------|--------------|--------------|----------------|
| C3—H3...O2              | 0.95     | 2.39         | 3.058(4)     | 127            |
| N1—H1...O1 <sup>i</sup> | 0.82 (5) | 2.19(5)      | 2.982(4)     | 163(4)         |

Symmetry codes: (i) -x+1, -y+2, -z+1

Table S6: Halogen-bond geometry for NPMSA-14DITFB (2:1), 3.

| C—X···A     | d(X···A) [Å] | ∠(C—X···A) [°] |
|-------------|--------------|----------------|
| C8—I1···O1  | 3.089(3)     | 168.2(1)       |
| C8—I1···O2* | 3.751(2)     | 150.7(1)       |
| C8—I1···S1* | 3.8204(9)    | 170.5(1)       |

\*Distances above sum of vdW radii but listed for comparison

**BSA-14DITFB (2:1), 4**

Table S7: Hydrogen-bond geometry for BSA-14DITFB (2:1), 4.

| D—H···A                  | D—H [Å] | d(H···A) [Å] | D(D···A) [Å] | ∠(D—H···A) [°] |
|--------------------------|---------|--------------|--------------|----------------|
| N1—H1···O1 <sup>i</sup>  | 0.79(3) | 2.08(3)      | 2.864(2)     | 173(3)         |
| C8—H8···O2 <sup>ii</sup> | 0.95    | 2.43         | 3.293(2)     | 151            |

Symmetry codes: (i) -x+3/2, y+1/2, -z+3/2; (ii) x, y+1, z

Table S8: Halogen-bond geometry for BSA-14DITFB (2:1), 4.

| C—X···A      | d(X···A) [Å] | ∠(C—X···A) [°] |
|--------------|--------------|----------------|
| C13—I1···cg  | 3.461        | 162.09         |
| C13—I1···C7  | 3.482(2)     | 169.15(6)      |
| C13—I1···C8  | 3.546(2)     | 151.53(6)      |
| C13—I1···C12 | 3.673(2)     | 168.23(6)      |

**CPA-14DITFB (2:1), 5**

Table S9: Hydrogen-bond geometry for CPA-14DITFB (2:1), 5.

| D—H···A                  | D—H [Å] | d(H···A) [Å] | D(D···A) [Å] | ∠(D—H···A) [°] |
|--------------------------|---------|--------------|--------------|----------------|
| N1—H1···O3 <sup>i</sup>  | 0.85(5) | 1.90(4)      | 2.725(4)     | 162(5)         |
| N2—H2A···O3 <sup>i</sup> | 0.82(5) | 2.20(4)      | 2.935(4)     | 151(5)         |
| N2—H2A···O1 <sup>i</sup> | 0.82(5) | 2.35(4)      | 2.947(4)     | 131(5)         |

Symmetry codes: (i) -x+1/2, y+1/2, -z+3/2

Table S10: Halogen-bond geometry for CPA-14DITFB (2:1), 5.

| C—X···A       | d(X···A) [Å] | ∠(C—X···A) [°] |
|---------------|--------------|----------------|
| C11—I1A···cg* | 3.625        | 151.55         |
| C11—I1A···C4* | 3.947(4)     | 148.4(1)       |
| C11—I1A···C5* | 3.764(4)     | 169.0(1)       |
| C11—I1A···C6* | 3.697(4)     | 162.5(1)       |

\*Distances above sum of vdW radii but listed for comparison

**CPA-14DBTFB (2:1), 6**

Table S11: Hydrogen-bond geometry for CPA-14DBTFB (2:1), 6.

| D—H···A                  | D—H [Å] | d(H···A) [Å] | D(D···A) [Å] | ∠(D—H···A) [°] |
|--------------------------|---------|--------------|--------------|----------------|
| N1—H1···O3 <sup>i</sup>  | 0.79(4) | 1.98(3)      | 2.733(2)     | 159(3)         |
| N2—H2A···O3 <sup>i</sup> | 0.80(3) | 2.27(3)      | 2.981(2)     | 148(3)         |
| N2—H2A···O1 <sup>i</sup> | 0.80(3) | 2.33(3)      | 2.948(2)     | 134(2)         |

Symmetry codes: (i) -x+1/2, y+1/2, -z+3/2

Table S12: Halogen-bond geometry for CPA-14DBTFB (2:1), 6.

| <b>C—X···A</b> | <b>d(X···A) [Å]</b> | <b>∠(C—X···A) [°]</b> |
|----------------|---------------------|-----------------------|
| C11—Br1···cg*  | 3.639               | 173.03                |
| C11—I1A···C1*  | 3.643(5)            | 164.1(2)              |
| C11—I1A···C2*  | 3.852(5)            | 164.2(2)              |
| C11—I1A···C6*  | 3.701(6)            | 157.2(2)              |

\*Distances above sum of vdW radii but listed for comparison

## CPA-12DITFB (2:1), 7

Table S13: Hydrogen-bond geometry for CPA-12DITFB (2:1), 7.

| <b>D—H···A</b>           | <b>D—H [Å]</b> | <b>d(H···A) [Å]</b> | <b>D(D···A) [Å]</b> | <b>∠(D—H···A) [°]</b> |
|--------------------------|----------------|---------------------|---------------------|-----------------------|
| N1—H1···O3 <sup>i</sup>  | 0.79(2)        | 1.99(3)             | 2.743(1)            | 159(2)                |
| N2—H2A···O3 <sup>i</sup> | 0.81(2)        | 2.24(2)             | 2.962(1)            | 149(2)                |
| N2—H2A···O1 <sup>i</sup> | 0.81(2)        | 2.35(2)             | 2.963(2)            | 133(2)                |

Symmetry codes: (i) -x+1/2, y+1/2, -z+3/2

Table S14: Halogen-bond geometry for CPA-12DITFB (2:1), 7.

| <b>C—X···A</b> | <b>d(X···A) [Å]</b> | <b>∠(C—X···A) [°]</b> |
|----------------|---------------------|-----------------------|
| C11—I1···cg    | 4.168               | 155.36                |
| C11—I1···C1    | 4.221(1)            | 153.63(4)             |
| C11—I1···C5    | 4.472(2)            | 162.82(4)             |
| C11—I1···C6    | 4.311(2)            | 172.23(5)             |

\*Distances above sum of vdW radii but listed for comparison

## Lists of PXRDs for structures 1-7

### NMBSA-14DITFB (1:1), 1

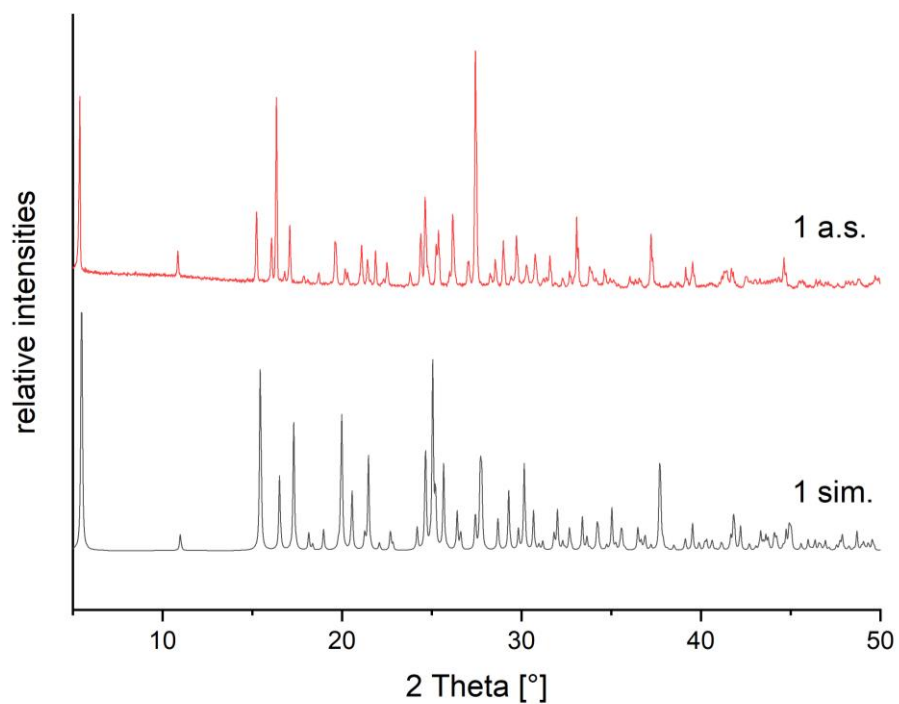

Figure S1: PXRDs of **1** as synthesized (a.s.) and simulated (sim.) based on the single crystal structure.

### NPMSA-14DITFB (1:1), 2

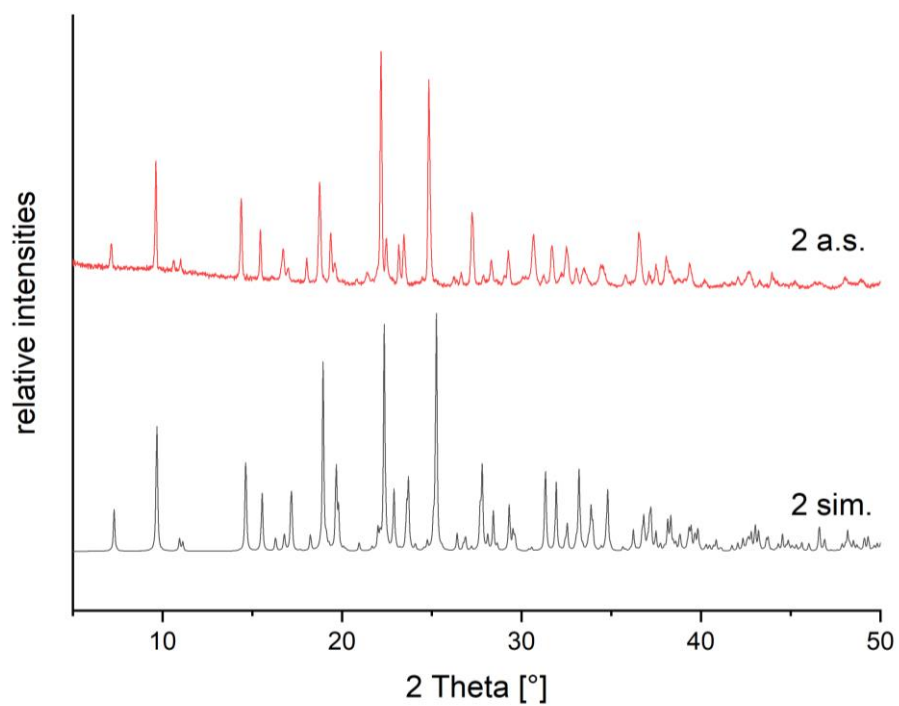

Figure S2: PXRDs of **2** as synthesized (a.s.) and simulated (sim.) based on the single crystal structure.

### NPMSA-14DITFB (2:1), 3

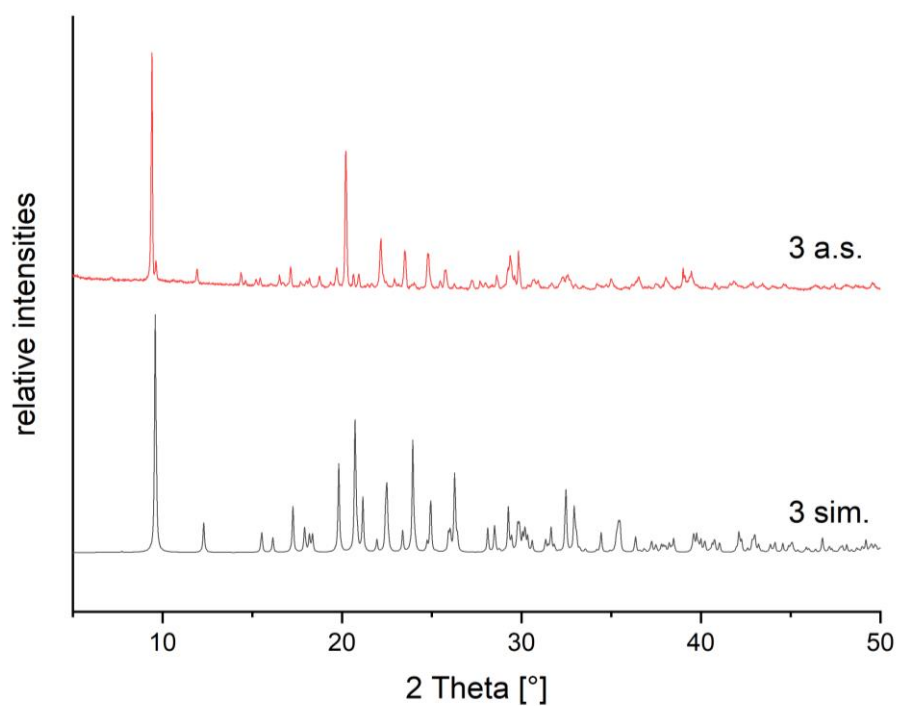

Figure S3: PXRDs of **3** as synthesized (a.s.) and simulated (sim.) based on the single crystal structure.

### BSA-14DITFB (2:1), 4

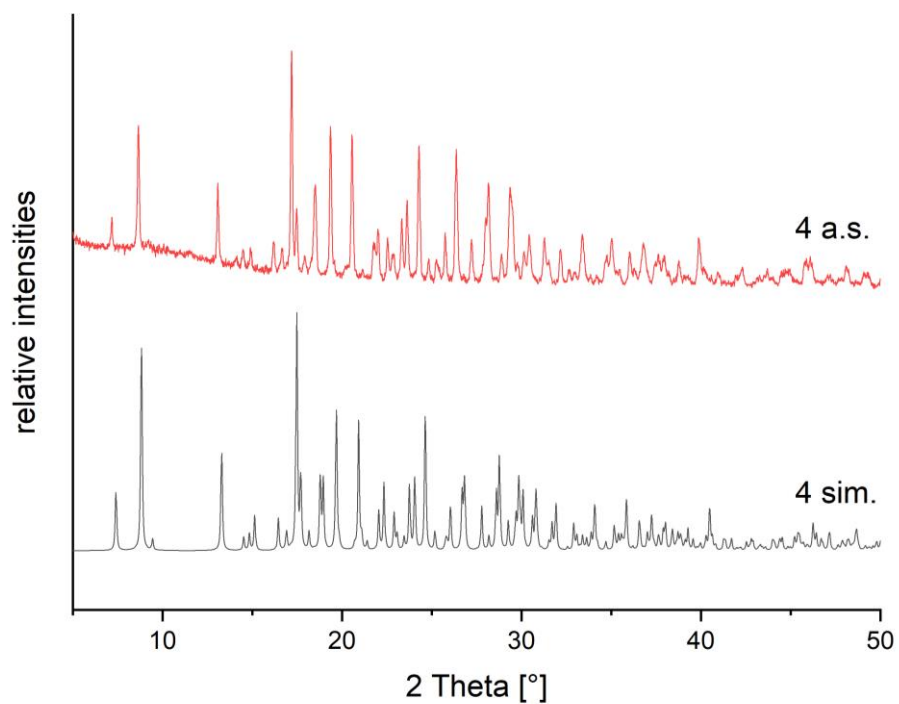

Figure S4: PXRDs of **4** as synthesized (a.s.) and simulated (sim.) based on the single crystal structure.

**CPA-14DITFB (2:1), 5**

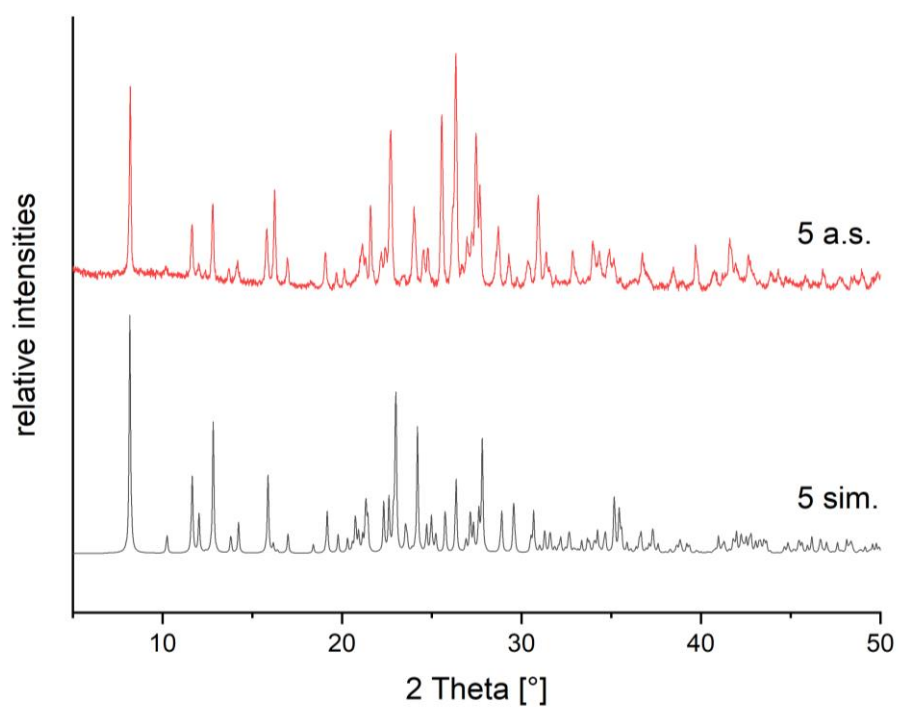

Figure S5: PXRDs of **5** as synthesized (a.s.) and simulated (sim.) based on the single crystal structure.

**CPA-14DBTFB (2:1), 6**

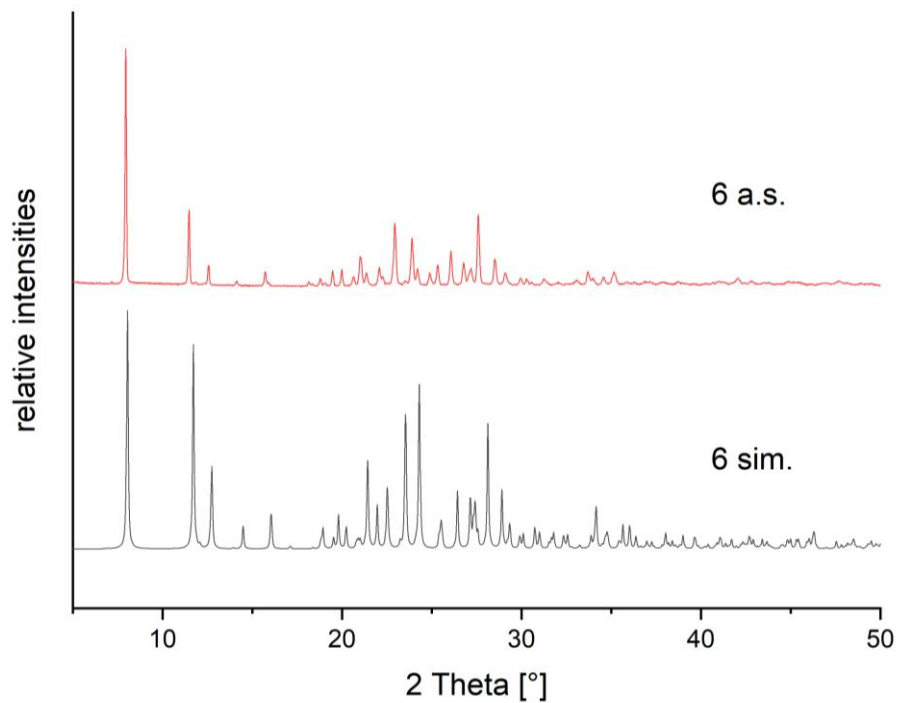

Figure S6: PXRDs of **6** as synthesized (a.s.) and simulated (sim.) based on the single crystal structure.

**CPA-12DITFB (2:1), 7**

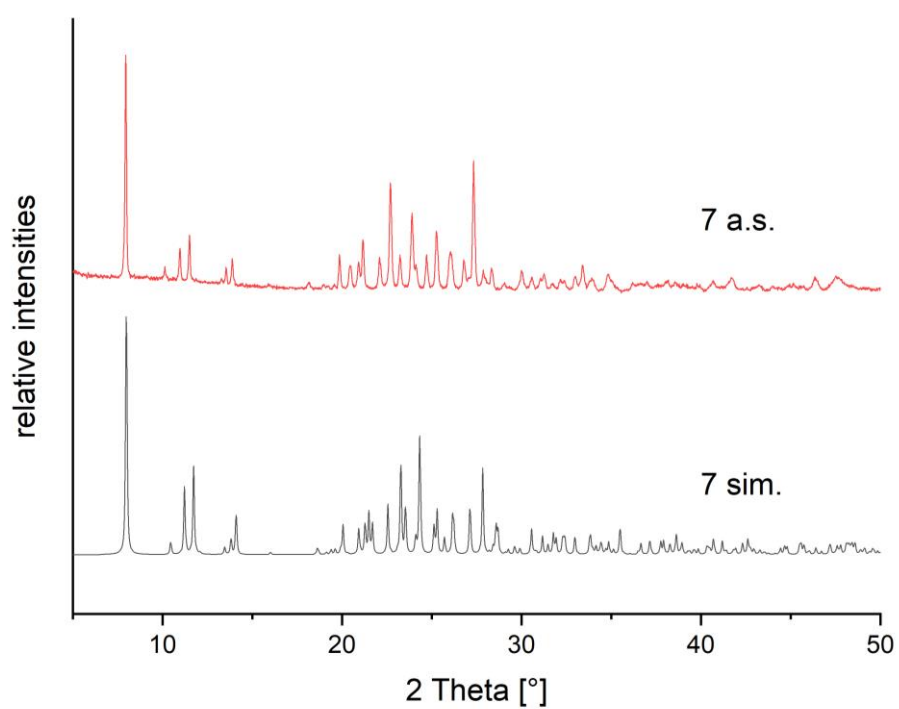

*Figure S7: PXRDs of 7 as synthesized (a.s.) and simulated (sim.) based on the single crystal structure.*



## List of CSD Search Parameters

### General Search Parameters

The search was performed in the CSD database (Update 11/12) with the *ConQuest* software. Following filters were used for every search request:

- 3D coordinates determined
- Only Non-disordered
- Only Single crystal structures
- R factor  $\leq 0.1$
- No errors
- No ions
- Only Organics

### Subgroup DITFB\_all

The subgroup of the diiodotetrafluorobenzenes (DITFB) – 1,4-diiodotetrafluorobenzene (14DITFB), 1,3-diiodotetrafluorobenzene (13DITFB), 1,2-diiodotetrafluorobenzene (12DITFB) – was defined by combining the following three queries with “OR” operator:

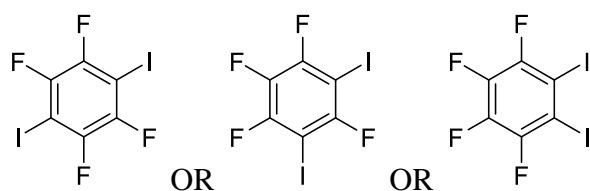

Figure S8: Searches for subgroup DITFB\_all.

There are 553 structures which match this request and respectively in the according subgroup.

### Search parameters for DITFB I...O interactions

Within the subgroup DITFB\_all I...O interactions were searched with the following search request:

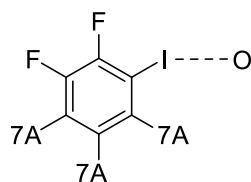

Figure S9: Search for I...O interactions. 7A stands for “Any Halogen”.

The I...O contact is defined as “inter-molecular” and “distance within sum of VdW + 0.0 Å” (3.50 Å). A total of 224 interactions of this nature have been identified.

### Search parameters for DITFB I...N interactions

Within the subgroup DITFB\_all I...N interactions were searched with the following search request:

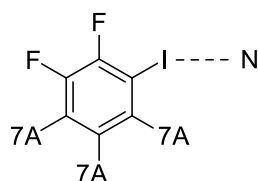

Figure S10: Search for I...N interactions. 7A stands for "Any Halogen".

The I...N contact is defined as "inter-molecular" and "distance within sum of VdW + 0.0 Å" (3.53 Å). A total of 583 interactions of this nature have been identified.

### Search parameters for DITFB I...cg\_w/o interactions

Within the subgroup DITFB\_all I...cg interactions, which are not disturbed by a strong XB acceptor O or N by searching for the respective interaction and excluding all structures with I...O or I...N interactions:

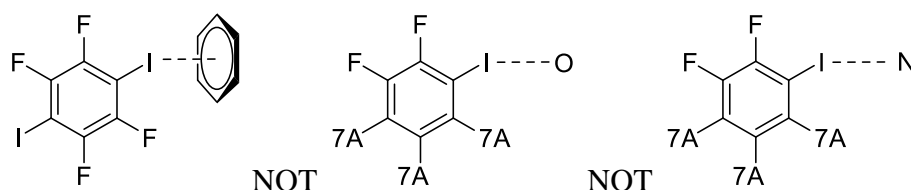

Figure S11: Search for I...cg\_w/o interactions. 7A stands for "Any Halogen".

The I...cg contact is defined as "inter-molecular" and "distance range: 2.5 to 4.5 Å" A total of 101 interactions of this nature have been identified.

### Search parameters for DITFB I...cg\_con interactions

Within the subgroup DITFB\_all I...cg interactions, which are concurrently occurring to an I...N or I...O interaction with the same iodine:

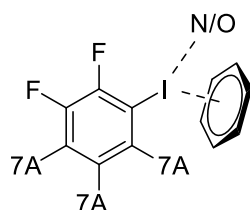

Figure S12: Search for I...cg\_con interactions. 7A stands for "Any Halogen".

The I...cg contact is defined as "inter-molecular" and "distance range: 2.5 to 4.5 Å" A total of 70 interactions of this nature have been identified.

### Search parameters for DITFB I...cg\_opp interactions

Within the subgroup DITFB\_all I...cg interactions, which are oppositely occurring to an I...N or I...O interaction with another iodine but not concurrently:

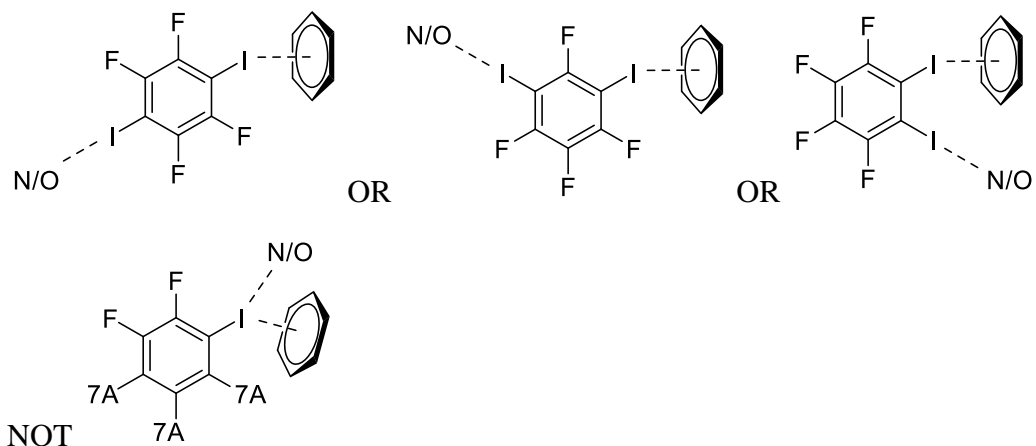

Figure S13: Search for I...cg\_opp interactions. 7A stands for “Any Halogen”.

The I...cg contact is defined as “inter-molecular” and “distance range: 2.5 to 4.5 Å” A total of 23 interactions of this nature have been identified.
