# Supplementary material for: Halogen Bonding in Sulphonamide Co-Crystals: X···π Preferred over X···O/N?
Source: Molecules. 2023 Aug 6;28(15):5910. doi: 10.3390/molecules28155910 (PMC10420850; doi:10.3390/molecules28155910)
Supplement: Supplementary file 1 [file molecules-28-05910-s001.zip]

Archive with 8 entries (8 files):
- 1-AK-MB1-1zu1_final.cif
- 2-AK_PM1_1zu1_final.cif
- 3-AK-PM1_2zu1_final.cif
- 4-AK-B1_2zu1_final.cif
- 5-SM052_3-CPA_14DITFB.cif
- 6-SM014-CPA_14DBTFB.cif
- 7-SM068_Mo-CPA_12DITFB.cif
- SI_molecules-2520932.pdf
