# Supplementary material for: Halogen Bonding in Sulphonamide Co-Crystals: X···π Preferred over X···O/N?
Source: Molecules. 2023 Aug 6;28(15):5910. doi: 10.3390/molecules28155910 (PMC10420850; doi:10.3390/molecules28155910)
Supplement: Supplementary file 1 [file molecules-28-05910-s001.zip › 1-AK-MB1-1zu1_final.cif]

 
data_AK-MB1-1zu1_final
 
_audit_creation_method            'SHELXL-2017/1'
_shelx_SHELXL_version_number      '2017/1'
_chemical_name_systematic         ?
_chemical_name_common             ?
_chemical_melting_point           ?
_chemical_formula_moiety          ?
_chemical_formula_sum
 'C13 H9 F4 I2 N O2 S' 
_chemical_formula_weight          573.07

loop_
 _atom_type_symbol
 _atom_type_description
 _atom_type_scat_dispersion_real
 _atom_type_scat_dispersion_imag
 _atom_type_scat_source
 'C'  'C'   0.0181   0.0091
 'International Tables Vol C Tables 4.2.6.8 and 6.1.1.4'
 'H'  'H'   0.0000   0.0000
 'International Tables Vol C Tables 4.2.6.8 and 6.1.1.4'
 'F'  'F'   0.0727   0.0534
 'International Tables Vol C Tables 4.2.6.8 and 6.1.1.4'
 'I'  'I'  -0.3257   6.8362
 'International Tables Vol C Tables 4.2.6.8 and 6.1.1.4'
 'N'  'N'   0.0311   0.0180
 'International Tables Vol C Tables 4.2.6.8 and 6.1.1.4'
 'O'  'O'   0.0492   0.0322
 'International Tables Vol C Tables 4.2.6.8 and 6.1.1.4'
 'S'  'S'   0.3331   0.5567
 'International Tables Vol C Tables 4.2.6.8 and 6.1.1.4'
 
_space_group_crystal_system       orthorhombic
_space_group_IT_number            33
_space_group_name_H-M_alt         'P n a 21'
_space_group_name_Hall            'P 2c -2n'
 
_shelx_space_group_comment
;
The symmetry employed for this shelxl refinement is uniquely defined
by the following loop, which should always be used as a source of
symmetry information in preference to the above space-group names.
They are only intended as comments.
;
 
loop_
 _space_group_symop_operation_xyz
 'x, y, z'
 '-x, -y, z+1/2'
 'x+1/2, -y+1/2, z'
 '-x+1/2, y+1/2, z+1/2'
 
_cell_length_a                    8.96170(10)
_cell_length_b                    5.82430(10)
_cell_length_c                    32.1685(5)
_cell_angle_alpha                 90
_cell_angle_beta                  90
_cell_angle_gamma                 90
_cell_volume                      1679.06(4)
_cell_formula_units_Z             4
_cell_measurement_temperature     100(2)
_cell_measurement_reflns_used     ?
_cell_measurement_theta_min       ?
_cell_measurement_theta_max       ?
 
_exptl_crystal_description        ?
_exptl_crystal_colour             ?
_exptl_crystal_density_meas       ?
_exptl_crystal_density_method     ?
_exptl_crystal_density_diffrn     2.267          
_exptl_crystal_F_000              1072
_exptl_transmission_factor_min    ?
_exptl_transmission_factor_max    ?
_exptl_crystal_size_max           0.140
_exptl_crystal_size_mid           0.070
_exptl_crystal_size_min           0.030
_exptl_absorpt_coefficient_mu     31.045
_shelx_estimated_absorpt_T_min    0.098
_shelx_estimated_absorpt_T_max    0.456
_exptl_absorpt_correction_type    ?
_exptl_absorpt_correction_T_min   ?
_exptl_absorpt_correction_T_max   ?
_exptl_absorpt_process_details    ?
_exptl_absorpt_special_details    ?
_diffrn_ambient_temperature       100(2)
_diffrn_radiation_wavelength      1.54184
_diffrn_radiation_type            CuK\a
_diffrn_source                    ?
_diffrn_measurement_device_type   ?
_diffrn_measurement_method        ?
_diffrn_detector_area_resol_mean  ?
_diffrn_reflns_number             17831
_diffrn_reflns_av_unetI/netI      0.0356
_diffrn_reflns_av_R_equivalents   0.0479
_diffrn_reflns_limit_h_min        -11
_diffrn_reflns_limit_h_max        10
_diffrn_reflns_limit_k_min        -7
_diffrn_reflns_limit_k_max        6
_diffrn_reflns_limit_l_min        -40
_diffrn_reflns_limit_l_max        40
_diffrn_reflns_theta_min          2.747
_diffrn_reflns_theta_max          78.814
_diffrn_reflns_theta_full         67.684
_diffrn_measured_fraction_theta_max   0.976
_diffrn_measured_fraction_theta_full  1.000
_diffrn_reflns_Laue_measured_fraction_max    0.976
_diffrn_reflns_Laue_measured_fraction_full   1.000
_diffrn_reflns_point_group_measured_fraction_max   0.913
_diffrn_reflns_point_group_measured_fraction_full  0.960
_reflns_number_total              3313
_reflns_number_gt                 3221
_reflns_threshold_expression      'I > 2\s(I)'
_reflns_Friedel_coverage          0.839
_reflns_Friedel_fraction_max      0.848
_reflns_Friedel_fraction_full     0.919
 
_reflns_special_details
;
 Reflections were merged by SHELXL according to the crystal
 class for the calculation of statistics and refinement.
 
 _reflns_Friedel_fraction is defined as the number of unique
 Friedel pairs measured divided by the number that would be
 possible theoretically, ignoring centric projections and
 systematic absences.
;
 
_computing_data_collection        ?
_computing_cell_refinement        ?
_computing_data_reduction         ?
_computing_structure_solution     ?
_computing_structure_refinement 'SHELXL-2017/1 (Sheldrick, 2017)'
_computing_molecular_graphics     ?
_computing_publication_material   ?
_refine_special_details           ?
_refine_ls_structure_factor_coef  Fsqd
_refine_ls_matrix_type            full
_refine_ls_weighting_scheme       calc
_refine_ls_weighting_details
'w=1/[\s^2^(Fo^2^)+(0.0614P)^2^+0.8826P] where P=(Fo^2^+2Fc^2^)/3'
_atom_sites_solution_primary      ?
_atom_sites_solution_secondary    ?
_atom_sites_solution_hydrogens    mixed
_refine_ls_hydrogen_treatment     mixed
_refine_ls_extinction_method      none
_refine_ls_extinction_coef        .
_refine_ls_abs_structure_details
;
 Flack x determined using 1411 quotients [(I+)-(I-)]/[(I+)+(I-)]
 (Parsons, Flack and Wagner, Acta Cryst. B69 (2013) 249-259).
;
_refine_ls_abs_structure_Flack    -0.021(8)
_chemical_absolute_configuration  ?
_refine_ls_number_reflns          3313
_refine_ls_number_parameters      213
_refine_ls_number_restraints      2
_refine_ls_R_factor_all           0.0335
_refine_ls_R_factor_gt            0.0328
_refine_ls_wR_factor_ref          0.0876
_refine_ls_wR_factor_gt           0.0871
_refine_ls_goodness_of_fit_ref    1.085
_refine_ls_restrained_S_all       1.085
_refine_ls_shift/su_max           0.001
_refine_ls_shift/su_mean          0.000
 
loop_
 _atom_site_label
 _atom_site_type_symbol
 _atom_site_fract_x
 _atom_site_fract_y
 _atom_site_fract_z
 _atom_site_U_iso_or_equiv
 _atom_site_adp_type
 _atom_site_occupancy
 _atom_site_site_symmetry_order  
 _atom_site_calc_flag
 _atom_site_refinement_flags_posn
 _atom_site_refinement_flags_adp
 _atom_site_refinement_flags_occupancy
 _atom_site_disorder_assembly
 _atom_site_disorder_group
I1 I 0.38038(5) 0.70105(6) 0.52648(2) 0.02372(15) Uani 1 1 d . . . . .
I2 I 0.68261(5) 0.29651(7) 0.71244(2) 0.02690(16) Uani 1 1 d . . . . .
S1 S 0.36881(19) 0.8155(3) 0.40951(6) 0.0183(4) Uani 1 1 d . . . . .
F3 F 0.6809(5) 0.0969(8) 0.62084(16) 0.0277(10) Uani 1 1 d . . . . .
F4 F 0.5681(6) 0.2510(9) 0.54953(16) 0.0310(11) Uani 1 1 d . . . . .
F2 F 0.4920(6) 0.7475(10) 0.69059(16) 0.0309(10) Uani 1 1 d . . . . .
F1 F 0.3812(5) 0.9046(8) 0.61942(17) 0.0304(11) Uani 1 1 d . . . . .
O1 O 0.3807(6) 0.5711(8) 0.40762(17) 0.0234(11) Uani 1 1 d . . . . .
O2 O 0.4996(5) 0.9489(9) 0.41918(17) 0.0235(10) Uani 1 1 d . . . . .
C8 C 0.4719(8) 0.5833(12) 0.5821(2) 0.0231(14) Uani 1 1 d . . . . .
C13 C 0.5486(8) 0.3772(13) 0.5840(2) 0.0217(13) Uani 1 1 d . . . . .
N1 N 0.2452(6) 0.8732(10) 0.44499(19) 0.0196(11) Uani 1 1 d D . . . .
C4 C 0.1756(9) 1.0721(16) 0.2877(3) 0.0324(18) Uani 1 1 d . . . . .
H4 H 0.132516 1.127326 0.262660 0.039 Uiso 1 1 calc R U . . .
C3 C 0.1296(9) 0.8597(17) 0.3041(3) 0.0294(16) Uani 1 1 d . . . . .
H3 H 0.055964 0.770587 0.290350 0.035 Uiso 1 1 calc R U . . .
C11 C 0.5893(8) 0.4175(12) 0.6577(2) 0.0219(14) Uani 1 1 d . . . . .
C12 C 0.6079(9) 0.2968(11) 0.6211(3) 0.0219(16) Uani 1 1 d . . . . .
C10 C 0.5122(9) 0.6233(12) 0.6564(2) 0.0228(13) Uani 1 1 d . . . . .
C9 C 0.4552(10) 0.7026(10) 0.6185(3) 0.0238(16) Uani 1 1 d . . . . .
C5 C 0.2836(12) 1.2012(12) 0.3079(3) 0.0330(19) Uani 1 1 d . . . . .
H5 H 0.315970 1.342114 0.296096 0.040 Uiso 1 1 calc R U . . .
C2 C 0.1941(9) 0.7822(12) 0.3410(3) 0.0236(15) Uani 1 1 d . . . . .
H2 H 0.165712 0.637604 0.352177 0.028 Uiso 1 1 calc R U . . .
C6 C 0.3456(9) 1.1263(13) 0.3456(2) 0.0265(14) Uani 1 1 d . . . . .
H6 H 0.417239 1.216747 0.359990 0.032 Uiso 1 1 calc R U . . .
C7 C 0.2040(9) 1.1173(12) 0.4512(3) 0.0252(15) Uani 1 1 d . . . . .
H7A H 0.293990 1.207133 0.457095 0.038 Uiso 1 1 calc R U . . .
H7B H 0.134702 1.129780 0.474690 0.038 Uiso 1 1 calc R U . . .
H7C H 0.156000 1.176217 0.426018 0.038 Uiso 1 1 calc R U . . .
C1 C 0.2987(8) 0.9142(11) 0.3614(2) 0.0210(13) Uani 1 1 d . . . . .
H1 H 0.164(9) 0.786(18) 0.442(5) 0.05(4) Uiso 1 1 d D . . . .
 
loop_
 _atom_site_aniso_label
 _atom_site_aniso_U_11
 _atom_site_aniso_U_22
 _atom_site_aniso_U_33
 _atom_site_aniso_U_23
 _atom_site_aniso_U_13
 _atom_site_aniso_U_12
I1 0.0225(3) 0.0249(3) 0.0237(3) 0.0033(2) -0.00155(18) 0.00097(15)
I2 0.0259(3) 0.0323(3) 0.0225(3) 0.0037(2) -0.00096(19) 0.00201(16)
S1 0.0167(8) 0.0161(8) 0.0221(9) -0.0007(6) -0.0008(6) 0.0001(5)
F3 0.030(2) 0.024(2) 0.030(2) 0.0011(18) 0.0027(17) 0.0119(18)
F4 0.044(3) 0.0264(18) 0.023(3) -0.0067(19) 0.003(2) 0.006(2)
F2 0.040(3) 0.0299(18) 0.023(2) -0.005(2) 0.003(2) 0.005(2)
F1 0.034(3) 0.022(2) 0.035(3) -0.0001(18) 0.0042(19) 0.0109(19)
O1 0.027(2) 0.013(2) 0.030(3) 0.0007(19) -0.0014(19) 0.0034(18)
O2 0.018(2) 0.023(2) 0.029(3) -0.0007(19) -0.0010(19) -0.0018(18)
C8 0.024(3) 0.021(3) 0.025(3) 0.000(3) 0.002(3) -0.001(3)
C13 0.020(3) 0.027(3) 0.018(3) -0.004(3) 0.001(3) 0.004(3)
N1 0.015(3) 0.018(3) 0.026(3) -0.001(2) -0.002(2) -0.001(2)
C4 0.029(4) 0.044(5) 0.024(4) 0.006(3) 0.002(3) 0.015(3)
C3 0.025(4) 0.042(4) 0.021(4) -0.002(4) -0.003(3) 0.004(3)
C11 0.023(3) 0.020(3) 0.023(3) 0.003(3) -0.001(3) -0.001(3)
C12 0.018(3) 0.018(4) 0.029(5) 0.003(2) 0.005(3) -0.001(2)
C10 0.027(3) 0.021(3) 0.020(3) -0.003(3) 0.002(3) 0.002(3)
C9 0.025(4) 0.016(3) 0.030(5) 0.002(3) 0.003(3) 0.005(3)
C5 0.043(5) 0.025(4) 0.031(5) 0.004(3) -0.004(4) 0.010(3)
C2 0.023(4) 0.025(4) 0.023(4) -0.003(3) 0.003(3) 0.000(3)
C6 0.033(4) 0.021(3) 0.026(4) 0.002(3) 0.004(3) 0.003(3)
C7 0.032(4) 0.019(3) 0.024(4) 0.000(3) 0.008(3) 0.003(3)
C1 0.021(3) 0.021(3) 0.021(3) -0.003(2) 0.000(3) 0.004(3)
 
_geom_special_details
;
 All esds (except the esd in the dihedral angle between two l.s. planes)
 are estimated using the full covariance matrix.  The cell esds are taken
 into account individually in the estimation of esds in distances, angles
 and torsion angles; correlations between esds in cell parameters are only
 used when they are defined by crystal symmetry.  An approximate (isotropic)
 treatment of cell esds is used for estimating esds involving l.s. planes.
;
 
loop_
 _geom_bond_atom_site_label_1
 _geom_bond_atom_site_label_2
 _geom_bond_distance
 _geom_bond_site_symmetry_2
 _geom_bond_publ_flag
I1 C8 2.085(8) . ?
I2 C11 2.072(7) . ?
S1 O1 1.429(5) . ?
S1 O2 1.440(5) . ?
S1 N1 1.626(6) . ?
S1 C1 1.766(8) . ?
F3 C12 1.336(9) . ?
F4 C13 1.343(9) . ?
F2 C10 1.329(9) . ?
F1 C9 1.351(9) . ?
C8 C9 1.370(11) . ?
C8 C13 1.385(10) . ?
C13 C12 1.387(12) . ?
N1 C7 1.482(8) . ?
N1 H1 0.89(3) . ?
C4 C5 1.387(14) . ?
C4 C3 1.407(13) . ?
C4 H4 0.9500 . ?
C3 C2 1.395(12) . ?
C3 H3 0.9500 . ?
C11 C12 1.382(11) . ?
C11 C10 1.384(10) . ?
C10 C9 1.399(12) . ?
C5 C6 1.404(12) . ?
C5 H5 0.9500 . ?
C2 C1 1.378(11) . ?
C2 H2 0.9500 . ?
C6 C1 1.400(10) . ?
C6 H6 0.9500 . ?
C7 H7A 0.9800 . ?
C7 H7B 0.9800 . ?
C7 H7C 0.9800 . ?
 
loop_
 _geom_angle_atom_site_label_1
 _geom_angle_atom_site_label_2
 _geom_angle_atom_site_label_3
 _geom_angle
 _geom_angle_site_symmetry_1
 _geom_angle_site_symmetry_3
 _geom_angle_publ_flag
O1 S1 O2 119.1(3) . . ?
O1 S1 N1 106.7(3) . . ?
O2 S1 N1 106.9(3) . . ?
O1 S1 C1 108.3(3) . . ?
O2 S1 C1 107.6(3) . . ?
N1 S1 C1 107.8(3) . . ?
C9 C8 C13 117.1(7) . . ?
C9 C8 I1 121.6(6) . . ?
C13 C8 I1 121.2(6) . . ?
F4 C13 C8 120.1(7) . . ?
F4 C13 C12 118.4(7) . . ?
C8 C13 C12 121.4(7) . . ?
C7 N1 S1 117.6(5) . . ?
C7 N1 H1 111(9) . . ?
S1 N1 H1 111(10) . . ?
C5 C4 C3 120.3(8) . . ?
C5 C4 H4 119.8 . . ?
C3 C4 H4 119.8 . . ?
C2 C3 C4 118.9(8) . . ?
C2 C3 H3 120.6 . . ?
C4 C3 H3 120.6 . . ?
C12 C11 C10 118.3(7) . . ?
C12 C11 I2 120.2(5) . . ?
C10 C11 I2 121.5(5) . . ?
F3 C12 C11 120.5(8) . . ?
F3 C12 C13 118.5(7) . . ?
C11 C12 C13 121.0(7) . . ?
F2 C10 C11 120.9(7) . . ?
F2 C10 C9 119.4(7) . . ?
C11 C10 C9 119.7(7) . . ?
F1 C9 C8 120.9(8) . . ?
F1 C9 C10 116.6(7) . . ?
C8 C9 C10 122.4(7) . . ?
C4 C5 C6 120.8(8) . . ?
C4 C5 H5 119.6 . . ?
C6 C5 H5 119.6 . . ?
C1 C2 C3 120.4(7) . . ?
C1 C2 H2 119.8 . . ?
C3 C2 H2 119.8 . . ?
C1 C6 C5 117.9(8) . . ?
C1 C6 H6 121.0 . . ?
C5 C6 H6 121.0 . . ?
N1 C7 H7A 109.5 . . ?
N1 C7 H7B 109.5 . . ?
H7A C7 H7B 109.5 . . ?
N1 C7 H7C 109.5 . . ?
H7A C7 H7C 109.5 . . ?
H7B C7 H7C 109.5 . . ?
C2 C1 C6 121.6(7) . . ?
C2 C1 S1 118.5(6) . . ?
C6 C1 S1 119.9(6) . . ?
 
loop_
 _geom_torsion_atom_site_label_1
 _geom_torsion_atom_site_label_2
 _geom_torsion_atom_site_label_3
 _geom_torsion_atom_site_label_4
 _geom_torsion
 _geom_torsion_site_symmetry_1
 _geom_torsion_site_symmetry_2
 _geom_torsion_site_symmetry_3
 _geom_torsion_site_symmetry_4
 _geom_torsion_publ_flag
C9 C8 C13 F4 179.6(7) . . . . ?
I1 C8 C13 F4 1.4(10) . . . . ?
C9 C8 C13 C12 -0.9(10) . . . . ?
I1 C8 C13 C12 -179.1(6) . . . . ?
O1 S1 N1 C7 -176.0(5) . . . . ?
O2 S1 N1 C7 55.6(6) . . . . ?
C1 S1 N1 C7 -59.9(6) . . . . ?
C5 C4 C3 C2 0.2(12) . . . . ?
C10 C11 C12 F3 -179.7(6) . . . . ?
I2 C11 C12 F3 2.6(10) . . . . ?
C10 C11 C12 C13 -1.1(11) . . . . ?
I2 C11 C12 C13 -178.8(6) . . . . ?
F4 C13 C12 F3 -0.4(11) . . . . ?
C8 C13 C12 F3 -179.9(7) . . . . ?
F4 C13 C12 C11 -179.0(7) . . . . ?
C8 C13 C12 C11 1.5(11) . . . . ?
C12 C11 C10 F2 -179.5(7) . . . . ?
I2 C11 C10 F2 -1.8(10) . . . . ?
C12 C11 C10 C9 0.2(10) . . . . ?
I2 C11 C10 C9 177.9(6) . . . . ?
C13 C8 C9 F1 -179.7(7) . . . . ?
I1 C8 C9 F1 -1.5(11) . . . . ?
C13 C8 C9 C10 0.0(12) . . . . ?
I1 C8 C9 C10 178.2(6) . . . . ?
F2 C10 C9 F1 -0.2(12) . . . . ?
C11 C10 C9 F1 -180.0(7) . . . . ?
F2 C10 C9 C8 -180.0(7) . . . . ?
C11 C10 C9 C8 0.3(12) . . . . ?
C3 C4 C5 C6 -1.9(13) . . . . ?
C4 C3 C2 C1 1.4(12) . . . . ?
C4 C5 C6 C1 2.0(13) . . . . ?
C3 C2 C1 C6 -1.2(12) . . . . ?
C3 C2 C1 S1 176.4(6) . . . . ?
C5 C6 C1 C2 -0.5(11) . . . . ?
C5 C6 C1 S1 -178.1(7) . . . . ?
O1 S1 C1 C2 36.0(7) . . . . ?
O2 S1 C1 C2 166.0(6) . . . . ?
N1 S1 C1 C2 -79.0(6) . . . . ?
O1 S1 C1 C6 -146.3(6) . . . . ?
O2 S1 C1 C6 -16.3(7) . . . . ?
N1 S1 C1 C6 98.7(6) . . . . ?
 
loop_
 _geom_hbond_atom_site_label_D 
 _geom_hbond_atom_site_label_H 
 _geom_hbond_atom_site_label_A 
 _geom_hbond_distance_DH 
 _geom_hbond_distance_HA 
 _geom_hbond_distance_DA 
 _geom_hbond_angle_DHA 
 _geom_hbond_site_symmetry_A 
 _geom_hbond_publ_flag
C6 H6 O1  0.95 2.59 3.284(9) 130.1 1_565 yes
C7 H7B F4  0.98 2.58 3.474(9) 152.5 3_465 yes
C7 H7C O2  0.98 2.60 3.287(9) 126.9 3_475 yes
N1 H1 S1  0.89(3) 2.91(7) 3.726(6) 153(12) 3_465 yes
N1 H1 O2  0.89(3) 2.14(5) 3.009(7) 164(14) 3_465 yes
 
_refine_diff_density_max    1.275
_refine_diff_density_min   -1.018
_refine_diff_density_rms    0.134

_shelx_res_file
;
TITL th_mb1-2zu1_autored_a.res in Pna2(1)
    AK-MB1-1zu1_final.res
    created by SHELXL-2017/1 at 14:46:28 on 26-Nov-2021
REM Old TITL TH_MB1-2zu1_autored in Pna2(1)
REM SHELXT solution in Pna2(1)
REM R1 0.059, Rweak 0.002, Alpha 0.004, Orientation as input
REM Flack x = -0.037 ( 0.009 ) from Parsons' quotients
REM Formula found by SHELXT: C1 N O2 F2 S I2
CELL 1.54184 8.9617 5.8243 32.1685 90 90 90
ZERR 4 0.0001 0.0001 0.0005 0 0 0
LATT -1
SYMM -X,-Y,0.5+Z
SYMM 0.5+X,0.5-Y,+Z
SYMM 0.5-X,0.5+Y,0.5+Z
SFAC C H F I N O S
UNIT 52 36 16 8 4 8 4
LIST 6 ! automatically inserted. Change 6 to 4 for CHECKCIF!!
DFIX 0.9 H1 N1

L.S. 200
PLAN  2
SIZE 0.03 0.07 0.14
TEMP -173.16(10)
CONF
MORE -1
BOND $H
fmap 2
acta
OMIT 5 6 15
OMIT 8 1 -27
OMIT 10 0 2
OMIT 7 3 -27
REM <olex2.extras>
REM <HklSrc "%.\\AK-MB1-1zu1_final.hkl">
REM </olex2.extras>
REM Instructions for potential hydrogen bonds
EQIV $1 x, y+1, z
HTAB C6 O1_$1
EQIV $2 x-1/2, -y+3/2, z
HTAB C7 F4_$2
EQIV $3 x-1/2, -y+5/2, z
HTAB C7 O2_$3
HTAB N1 S1_$2
HTAB N1 O2_$2

WGHT    0.061400    0.882600
FVAR       2.45087
I1    4    0.380380    0.701049    0.526479    11.00000    0.02255    0.02493 =
         0.02369    0.00335   -0.00155    0.00097
I2    4    0.682614    0.296508    0.712441    11.00000    0.02594    0.03227 =
         0.02249    0.00370   -0.00096    0.00201
S1    7    0.368814    0.815502    0.409515    11.00000    0.01671    0.01609 =
         0.02211   -0.00068   -0.00082    0.00014
F3    3    0.680905    0.096880    0.620841    11.00000    0.02954    0.02388 =
         0.02957    0.00109    0.00270    0.01189
F4    3    0.568126    0.251045    0.549528    11.00000    0.04369    0.02643 =
         0.02282   -0.00667    0.00348    0.00553
F2    3    0.492000    0.747467    0.690589    11.00000    0.04010    0.02992 =
         0.02268   -0.00537    0.00294    0.00535
F1    3    0.381154    0.904637    0.619419    11.00000    0.03393    0.02192 =
         0.03544   -0.00006    0.00415    0.01088
O1    6    0.380677    0.571102    0.407622    11.00000    0.02732    0.01318 =
         0.02966    0.00074   -0.00141    0.00337
O2    6    0.499568    0.948875    0.419181    11.00000    0.01831    0.02296 =
         0.02919   -0.00074   -0.00104   -0.00185
C8    1    0.471905    0.583280    0.582133    11.00000    0.02371    0.02063 =
         0.02493    0.00033    0.00247   -0.00072
C13   1    0.548637    0.377211    0.584047    11.00000    0.01974    0.02742 =
         0.01783   -0.00422    0.00131    0.00380
N1    5    0.245155    0.873235    0.444994    11.00000    0.01531    0.01757 =
         0.02578   -0.00051   -0.00189   -0.00145
C4    1    0.175620    1.072071    0.287717    11.00000    0.02876    0.04449 =
         0.02387    0.00583    0.00241    0.01487
AFIX  43
H4    2    0.132516    1.127326    0.262660    11.00000   -1.20000
AFIX   0
C3    1    0.129650    0.859710    0.304147    11.00000    0.02485    0.04200 =
         0.02140   -0.00228   -0.00307    0.00383
AFIX  43
H3    2    0.055964    0.770587    0.290350    11.00000   -1.20000
AFIX   0

C11   1    0.589323    0.417512    0.657735    11.00000    0.02308    0.02002 =
         0.02252    0.00273   -0.00054   -0.00129
C12   1    0.607896    0.296810    0.621110    11.00000    0.01784    0.01828 =
         0.02948    0.00337    0.00484   -0.00117
C10   1    0.512174    0.623324    0.656395    11.00000    0.02680    0.02149 =
         0.02021   -0.00280    0.00150    0.00156
C9    1    0.455151    0.702615    0.618533    11.00000    0.02529    0.01648 =
         0.02959    0.00205    0.00297    0.00451
C5    1    0.283599    1.201210    0.307927    11.00000    0.04282    0.02528 =
         0.03101    0.00394   -0.00387    0.00964
AFIX  43
H5    2    0.315970    1.342114    0.296096    11.00000   -1.20000
AFIX   0
C2    1    0.194077    0.782217    0.341035    11.00000    0.02262    0.02523 =
         0.02306   -0.00255    0.00349    0.00044
AFIX  43
H2    2    0.165712    0.637604    0.352177    11.00000   -1.20000
AFIX   0
C6    1    0.345627    1.126346    0.345630    11.00000    0.03329    0.02051 =
         0.02583    0.00186    0.00434    0.00291
AFIX  43
H6    2    0.417239    1.216747    0.359990    11.00000   -1.20000
AFIX   0
C7    1    0.203975    1.117256    0.451227    11.00000    0.03245    0.01887 =
         0.02427   -0.00039    0.00782    0.00268
AFIX 137
H7A   2    0.293990    1.207133    0.457095    11.00000   -1.50000
H7B   2    0.134702    1.129780    0.474690    11.00000   -1.50000
H7C   2    0.156000    1.176217    0.426018    11.00000   -1.50000
AFIX   0
C1    1    0.298668    0.914249    0.361418    11.00000    0.02138    0.02119 =
         0.02058   -0.00279   -0.00037    0.00399
H1    2    0.163983    0.785544    0.442202    11.00000    0.04997
HKLF 4


REM  th_mb1-2zu1_autored_a.res in Pna2(1)
REM R1 =  0.0328 for    3221 Fo > 4sig(Fo)  and  0.0335 for all    3313 data
REM    213 parameters refined using      2 restraints

END

WGHT      0.0614      0.8826

REM Highest difference peak  1.275,  deepest hole -1.018,  1-sigma level  0.134
Q1    1   0.3815  0.7009  0.4989  11.00000  0.05    1.28
Q2    1   0.3792  0.7050  0.5533  11.00000  0.05    1.24
;
_shelx_res_checksum   33032

_shelx_hkl_file
;
   0   0 -39 63.2371 65.1369   1
   0   0  -8 67081.6 3778.44  31
   0   0  -7 208.468 408.889  31
   0   0  -6 319552. 15976.8  31
   0   0  -5 180.101 374.035  31
   0   0  -4 63619.4 3471.85  31
   0   0  -3-138.323 313.255  31
   0   0  -2 132183. 6674.88  31
   0   0   3 116.099 105.825  38
   0   0   4 12987.0 946.195  30
   0   0   5-121.531 324.926  30
   0   0   6 341459. 16997.0  30
   0   0   7-49.1062 382.229  30
   0   0   8 70554.4 3919.81  30
   0   0   9 223.746 442.166  30
   0   0  10 924430. 45401.2  30
   0   0  11 123.863 382.895  30
   0   0  12 412704. 20648.0  30
   0   0  13 270.889 375.817  30
   0   0  14 10811.1 1061.33  30
   0   0  15 17.0423 153.553  34
   0   0  15 588.908 348.204  30
   0   0  16 377718. 18826.5  34
   0   0  16 411659. 19448.9  30
   0   0  16 385975. 18820.2  19
   0   0  17-18.5108 145.186  34
   0   0  17 70.1092 127.756  19
   0   0  17-160.486 346.453  30
   0   0  18 40784.9 2115.60  34
   0   0  18 42303.2 2692.02  30
   0   0  18 38288.8 2094.75  19
   0   0  19 87.8182 388.552  30
   0   0  19 100.565 155.415  34
   0   0  20 145754. 7737.95  30
   0   0  20 140389. 7059.78  34
   0   0  21 192.406 382.964  30
   0   0  21 65.5535 153.633  34
   0   0  22 300316. 15015.0  34
   0   0  22 328591. 15826.4  30
   0   0  23 209.771 320.233  30
   0   0  23 47.1358 159.314  34
   0   0  24 59075.5 3776.27  30
   0   0  24 57995.0 3053.01  34
   0   0  25-112.752 392.483  30
   0   0  25 25.0150 165.569  34
   0   0  26 125453. 6908.39  30
   0   0  26 118766. 6062.49  34
   0   0  27-118.326 342.713  30
   0   0  27 78.2017 170.696  34
   0   0  28 16170.4 1631.51  30
   0   0  28 15974.3 1011.71  34
   0   0  29-120.115 306.841  30
   0   0  29 209.534 157.400  35
   0   0  29 26.0254 160.945  34
   0   0  30 46124.4 3318.91  29
   0   0  30 48549.1 2602.00  35
   0   0  30 49991.3 3409.77  30
   0   0  30 50614.2 2637.16  34
   0   0  31 465.180 355.245  30
   0   0  31 109.355 365.915  29
   0   0  31 173.630 142.612  35
   0   0  31 345.187 186.297  34
   0   0  32 163289. 9132.57  29
   0   0  32 169473. 9211.65  30
   0   0  32 164285. 8341.29  35
   0   0  32 173342. 8382.23  34
   0   0  33 262.037 148.192  35
   0   0  33 109.098 153.632  34
   0   0  34 43929.8 2274.13  35
   0   0  34 43089.7 2304.25  34
   0   0  35 53.1979 122.286  34
   0   0  36 41733.8 2172.75  34
   0   0  37 128.161 99.9486  34
   0   0  38 60952.1 3073.93  10
   0   0  39 177.897 89.8999  10
   0   0  40 4295.88 275.579  10
   0  -1 -39 21342.0 1116.64   1
   0  -1 -38 66.8001 94.3733   1
   0  -1 -16-105.666 444.698  31
   0  -1 -15 209463. 11158.3  31
   0  -1 -14-102.880 465.897  31
   0  -1 -13 425681. 16874.2  31
   0  -1 -13 309918. 15729.0  15
   0  -1 -12-103.975 511.854  31
   0  -1 -12 99.4799 205.169  15
   0  -1 -11 109555. 5897.24  15
   0  -1 -11 140887. 6757.95  31
   0  -1 -10-39.8054 326.090  15
   0  -1  -9 460859. 22799.0  15
   0  -1  -8-399.773 465.654  15
   0  -1  -7 496780. 24611.2  15
   0  -1  -6-291.683 568.981  15
   0  -1  -5 55628.8 3162.10  15
   0  -1  -5 49861.7 2800.53  28
   0  -1  -4 355.220 685.901  15
   0  -1  -4 86.3280 186.432  28
   0  -1  -3 445980. 21507.2  15
   0  -1  -3 421142. 20952.6  28
   0  -1  -2 169.373 766.971  15
   0  -1  -2 45.5962 157.202  28
   0  -1  -1 409118. 19146.9  15
   0   1  -1 371624. 18235.9  32
   0  -1   0 104.858 986.739  15
   0   1   0 175.873 87.3821  32
   0  -1   2 146.559 131.407  29
   0  -1   3 272039. 13347.1  29
   0  -1   4 143.026 690.545  15
   0  -1   4 296.352 182.002  29
   0  -1   5 63385.4 3465.43  15
   0  -1   5 55424.9 2973.45  29
   0  -1   6 186.937 622.382  15
   0  -1   6 232.458 227.443  29
   0  -1   7 486402. 23397.2  15
   0  -1   7 462257. 23113.7  29
   0  -1   8 379.292 520.534  15
   0  -1   8 73.4212 258.101  29
   0  -1   9 423893. 21038.4  15
   0  -1  10-177.845 374.306  15
   0   1  11 117006. 5689.23  38
   0  -1  11 104817. 5737.21  15
   0   1  12 240.525 172.115  38
   0  -1  12 238.276 257.454  15
   0   1  13 289192. 14662.2  38
   0  -1  13 302129. 14602.1  15
   0  -1  14 293.349 149.281  15
   0   1  14-168.674 188.245  33
   0   1  14 297.585 154.969  38
   0  -1  15 189283. 9394.72  34
   0   1  15 184784. 9469.29  33
   0  -1  15 210043. 10192.9  30
   0  -1  16 41.5042 174.718  34
   0  -1  16 97.5581 364.809  30
   0   1  16 365.924 395.000  30
   0  -1  17 174253. 8896.35  30
   0  -1  17 162727. 8114.40  34
   0   1  17 167608. 8810.56  30
   0   1  17 160832. 8064.04  19
   0   1  18 287.982 414.470  30
   0  -1  18 203.043 415.843  30
   0  -1  18 245.253 163.952  35
   0   1  18-17.0850 116.676  19
   0  -1  18-21.8094 168.474  34
   0   1  18 122.444 196.412  34
   0  -1  19 322947. 16667.3  35
   0   1  19 364588. 17501.0  30
   0  -1  19 378532. 17588.5  30
   0  -1  19 346815. 16711.0  34
   0   1  19 350135. 16735.6  34
   0   1  19 334505. 16653.3  19
   0   1  20-101.118 323.833  30
   0  -1  20 214.040 400.205  30
   0  -1  20 257.787 157.984  35
   0   1  20 35.7199 117.102  19
   0  -1  20 275.897 189.745  34
   0   1  20 76.1697 191.543  34
   0  -1  21 24034.6 1215.51  35
   0   1  21 19431.2 1764.08  30
   0   1  21 20217.1 1229.82  34
   0  -1  21 20542.2 1217.06  34
   0  -1  21 18261.3 1750.42  30
   0   1  21 18716.4 1156.48  19
   0   1  22 26.3713 180.104  34
   0  -1  22-24.1839 160.152  34
   0  -1  22 207.890 175.048  35
   0   1  22 106.418 324.933  30
   0  -1  22 506.043 390.876  29
   0  -1  22 452.685 393.975  30
   0  -1  23 136431. 7673.56  30
   0   1  23 139003. 7625.79  30
   0  -1  23 140381. 6854.53  34
   0   1  23 137055. 6869.38  34
   0  -1  23 130805. 6806.53  35
   0  -1  23 141723. 7624.17  29
   0  -1  24 301.226 212.764  34
   0   1  24-27.3169 188.460  34
   0  -1  24 236.595 172.621  35
   0   1  24 446.708 417.626  30
   0  -1  24-106.288 423.143  29
   0  -1  24-238.556 446.044  30
   0   1  25 286341. 14737.5  30
   0  -1  25 285974. 13892.6  34
   0   1  25 289317. 13914.0  34
   0  -1  25 265602. 13840.2  35
   0  -1  25 290904. 14707.9  29
   0  -1  25 302989. 14870.5  30
   0   1  26 27.8704 182.510  34
   0  -1  26 154.069 185.533  34
   0  -1  26-43.5947 141.190  35
   0  -1  26 109.777 351.512  29
   0   1  26 115.777 370.725  30
   0  -1  26 248.376 379.150  30
   0  -1  27 3854.68 397.182  34
   0   1  27 3956.07 423.825  34
   0  -1  27 4164.22 383.043  35
   0  -1  27 3391.71 781.488  30
   0  -1  27 3753.69 755.687  29
   0   1  27 4438.99 804.745  30
   0  -1  28 50.9854 172.327  34
   0   1  28 110.260 166.242  34
   0  -1  28 42.7393 138.455  35
   0   1  28 350.442 338.352  30
   0  -1  28 110.275 336.691  29
   0  -1  29 93125.5 4601.33  34
   0   1  29 89935.0 5398.94  30
   0   1  29 90657.0 4616.95  34
   0  -1  29 86060.9 4544.89  35
   0  -1  29 88132.6 5336.84  29
   0  -1  29 94635.6 5524.27  30
   0   1  30 184.244 176.095  34
   0  -1  30 145.346 170.306  34
   0  -1  30 79.6573 124.661  35
   0  -1  30-123.267 476.041  30
   0   1  30-113.193 345.596  30
   0  -1  30 213.247 325.542  29
   0   1  31 84769.0 4207.23  34
   0   1  31 80414.7 4939.96  30
   0  -1  31 84825.7 4185.56  34
   0  -1  31 76822.3 4122.94  35
   0  -1  31 84417.6 4932.98  29
   0  -1  31 80576.0 5024.57  30
   0   1  32 333.778 172.320  34
   0  -1  32 108.636 148.412  34
   0  -1  32 34.3062 112.432  35
   0   1  32 104.332 284.939  30
   0  -1  32-114.775 332.461  30
   0   1  33 8124.30 579.736  35
   0  -1  33 8236.96 583.893  34
   0   1  33 7994.60 589.725  34
   0   1  34 18.1434 128.854  35
   0   1  34 80.3089 138.551  34
   0  -1  34 288.258 140.355  34
   0   1  35 107954. 5449.76  35
   0   1  35 112795. 5474.14  34
   0  -1  35 107373. 5449.76  34
   0   1  36 162.055 114.607  35
   0  -1  36 221.291 147.146  10
   0   1  36 77.2406 113.785  34
   0  -1  37 4571.03 357.236  24
   0  -1  37 5241.45 362.001  10
   0   1  37 4295.34 342.211  34
   0  -1  38 24.7825 87.0972  18
   0  -1  38 94.1463 97.7405  24
   0  -1  38-132.275 125.040  10
   0   1  38 8.85405 86.7584  10
   0   1  38 71.8603 86.4071  34
   0  -1  39 13820.9 635.056  10
   0   1  39 9404.18 573.741  10
   0  -1  40 60.5469 65.6608  10
   0  -2 -39 12.4444 53.3960   1
   0  -2 -38 37454.4 1904.72   1
   0  -2 -37 82.0346 94.0663   1
   0  -2 -36 30617.1 1621.33   1
   0  -2 -35 13.7514 111.868  23
   0  -2 -34 17042.5 990.042  23
   0  -2 -33 116.826 144.501  23
   0  -2 -18 41085.0 2348.14  27
   0  -2 -17 38.7396 264.468  27
   0  -2 -16 214924. 10802.4  27
   0  -2 -15 108.343 228.787  27
   0  -2 -15 579.486 559.519  31
   0  -2 -14-33.2935 231.799  27
   0  -2 -14 138.906 341.912  15
   0  -2 -14 447.481 644.013  31
   0  -2 -13 61.0689 224.524  27
   0  -2 -13 230.474 419.574  15
   0  -2 -13-136.168 630.471  31
   0  -2 -12 245563. 11892.7  27
   0  -2 -12 242745. 12774.4  31
   0  -2 -12 221036. 12354.0  15
   0  -2 -11 176.541 206.782  27
   0  -2 -11 105.368 487.933  31
   0  -2 -11 274.507 558.773  15
   0  -2 -10 351867. 17156.7  27
   0  -2 -10 353945. 17832.8  31
   0  -2 -10 333230. 17809.5  15
   0  -2  -9 320.625 379.475  31
   0  -2  -9 398.384 592.962  15
   0  -2  -8 20420.5 1551.74  28
   0  -2  -8 23114.2 1641.75  31
   0  -2  -8 20300.9 1860.49  15
   0  -2  -7 534.802 292.829  28
   0  -2  -7 60.4839 298.049  31
   0  -2  -7 223.351 647.030  15
   0  -2  -6 542494. 26783.5  28
   0  -2  -6 538343. 27426.6  15
   0  -2  -5 256.893 262.506  28
   0   2  -5 59.8407 127.809  32
   0  -2  -5-125.849 850.502  15
   0   2  -4 213391. 10527.0  32
   0  -2  -4 212878. 11633.7  15
   0   2  -3-17.5298 122.040  32
   0  -2  -3 870.928 990.919  15
   0   2  -2 81007.1 4115.90  32
   0  -2  -2 82850.3 5372.56  15
   0  -2  -1 337.134 1079.62  15
   0  -2   0 628675. 32290.3  15
   0  -2   1 284.846 229.489  28
   0  -2   4 241173. 12970.0  15
   0  -2   5 249.952 818.418  15
   0  -2   6 452326. 22788.5  29
   0  -2   6 499071. 23659.5  15
   0  -2   7 80.3622 257.329  29
   0  -2   7-109.977 758.248  15
   0  -2   8 22534.6 1535.80  30
   0  -2   8 21281.0 1436.28  29
   0  -2   8 23726.7 1973.87  15
   0  -2   9 188.463 244.998  29
   0  -2   9-58.7412 266.036  30
   0  -2   9 296.025 602.520  15
   0  -2  10 311685. 15490.5  30
   0  -2  10 292577. 15330.3  29
   0  -2  10 323879. 15792.2  15
   0  -2  11 73.5324 301.196  30
   0  -2  11 56.6854 262.466  29
   0  -2  11 58.0628 128.459  34
   0   2  11 27.7463 191.312  33
   0  -2  11-89.7057 512.366  15
   0  -2  12 222217. 11135.2  30
   0  -2  12 207477. 10912.8  29
   0  -2  12 212972. 10469.3  34
   0   2  12 210036. 10618.5  33
   0  -2  12 216096. 11130.9  15
   0  -2  13 278.480 322.538  29
   0  -2  13 369.511 399.002  30
   0  -2  13 230.319 399.301  15
   0  -2  13 210.623 145.211  34
   0   2  13 212.774 227.375  33
   0  -2  14 2365.15 621.162  30
   0  -2  14 2235.22 531.632  29
   0  -2  14 2147.37 533.032  15
   0  -2  14 2199.42 242.248  35
   0   2  14 2287.09 398.922  33
   0  -2  14 2121.27 268.917  34
   0  -2  15 85.1913 358.541  29
   0  -2  15-187.034 345.801  15
   0   2  15 244.177 194.462  38
   0  -2  15 243.593 140.637  35
   0  -2  15-21.1712 151.671  34
   0   2  15 153.541 237.345  33
   0   2  16 164239. 8185.31  33
   0  -2  16 165736. 8034.42  34
   0  -2  16 158486. 7985.30  35
   0  -2  16 151853. 8294.71  15
   0  -2  16 163000. 8709.73  29
   0  -2  17-103.015 372.148  29
   0  -2  17 124.722 169.150  35
   0   2  17 191.473 233.860  33
   0  -2  17 25.3224 182.992  34
   0  -2  18 38219.1 2776.69  29
   0   2  18 36904.4 2182.99  33
   0  -2  18 39372.5 2097.88  34
   0  -2  18 36773.5 2039.11  35
   0   2  19 368.261 502.837  30
   0  -2  19-116.307 372.468  29
   0  -2  19 75.2811 153.352  13
   0  -2  19 225.750 156.629  14
   0  -2  19 141.925 199.604  34
   0  -2  19 115.659 159.610  35
   0  -2  20 33675.1 2697.52  29
   0  -2  20 40038.2 2065.05  13
   0  -2  20 36668.1 2077.70  34
   0   2  20 38416.6 2814.91  30
   0  -2  20 36304.7 2028.20  35
   0   2  21-122.559 426.618  30
   0  -2  21-116.826 374.074  29
   0  -2  21-47.5810 154.076  13
   0  -2  21 171.183 196.706  34
   0  -2  21 46.1602 154.377  35
   0  -2  22 114196. 6837.60  29
   0  -2  22 123876. 6030.16  13
   0   2  22 124464. 6938.69  30
   0  -2  22 124374. 6081.31  34
   0  -2  22 112220. 6003.98  35
   0  -2  23 117.003 319.509  29
   0   2  23 365.550 485.043  30
   0  -2  23 141.872 183.787  34
   0  -2  23-22.6598 140.110  35
   0  -2  24 582.406 421.423  29
   0   2  24 606.017 438.456  30
   0  -2  24 675.049 225.154  34
   0  -2  24 356.112 163.921  35
   0  -2  25-115.576 370.165  29
   0   2  25 119.801 383.691  30
   0  -2  25 387.804 193.024  34
   0  -2  25 129.854 141.955  35
   0  -2  26 84285.3 5170.19  29
   0  -2  26 92287.3 4427.92  34
   0   2  26 87755.1 4458.21  34
   0   2  26 80066.8 5143.85  30
   0  -2  26 80969.5 4338.55  35
   0   2  27 115.919 353.953  30
   0  -2  27 666.729 371.684  29
   0   2  27-91.0372 205.176  34
   0  -2  27 209.466 187.575  34
   0  -2  27 118.825 141.938  35
   0  -2  28 35545.8 2613.71  29
   0   2  28 35285.1 1929.72  34
   0  -2  28 36271.5 1900.15  34
   0   2  28 31988.3 2551.49  30
   0  -2  28 31833.6 1815.83  35
   0   2  29-109.174 333.305  30
   0  -2  29 103.475 282.556  29
   0   2  29 140.475 201.157  34
   0  -2  29 47.7184 161.242  34
   0  -2  29-33.9445 98.3154  35
   0  -2  30 2848.58 617.578  29
   0   2  30 3233.68 652.844  30
   0   2  30 4069.47 410.472  34
   0  -2  31 95.0470 179.250  24
   0   2  31 124.169 171.301  34
   0  -2  32 88681.7 4516.43  24
   0   2  32 88769.0 4524.02  34
   0  -2  33-20.1431 144.229  24
   0   2  33 83.2543 150.377  34
   0  -2  34 15368.9 888.054  24
   0  -2  34 14406.1 893.901  18
   0   2  34 14230.0 880.039  34
   0   2  35 45.3301 111.107  35
   0  -2  35 174.446 126.263  24
   0  -2  35-34.6957 123.082  18
   0   2  35-32.3886 114.899  34
   0   2  36 22317.1 1224.82  35
   0  -2  36 22508.8 1233.80  24
   0  -2  36 22655.6 1247.55  18
   0   2  36 23664.8 1241.88  34
   0   2  37-9.97994 81.7584  35
   0   2  37 54.9951 86.2706  34
   0  -2  37 77.5214 97.4084  24
   0  -2  37-49.5252 93.3610  18
   0  -3 -34-54.2850 95.4213  23
   0  -3 -33 972.663 178.500  23
   0  -3 -32 57.7608 117.595  23
   0  -3 -31 28775.1 1601.17  23
   0  -3 -30-121.102 158.700  23
   0  -3 -29 54294.8 2885.58  23
   0  -3 -28-84.9383 170.751  23
   0  -3 -19 76909.9 4202.61  27
   0  -3 -19 78382.9 5127.29  31
   0  -3 -18 99.6632 288.655  27
   0  -3 -18-157.534 569.062  31
   0  -3 -17 78016.5 4161.40  27
   0  -3 -17 69546.1 4962.66  31
   0  -3 -16 140.434 274.989  27
   0  -3 -16 162.552 565.873  31
   0  -3 -15 64861.7 3413.73  27
   0  -3 -15 61272.9 4343.10  31
   0  -3 -15 53863.1 3859.63  15
   0  -3 -14 174.035 531.387  31
   0  -3 -14 345.414 471.676  15
   0  -3 -14 123.223 254.048  27
   0  -3 -13 137839. 7005.72  27
   0  -3 -13 144478. 8115.78  31
   0  -3 -13 129784. 7704.55  15
   0  -3 -13 136133. 6922.74  16
   0  -3 -12-106.819 225.418  27
   0  -3 -12 428.673 457.534  31
   0  -3 -12 131.019 521.534  15
   0  -3 -12 32.4725 295.756  16
   0  -3 -11 7099.80 601.618  27
   0  -3 -11 4251.44 964.372  31
   0  -3 -11 6109.59 629.894  16
   0  -3 -11 6971.85 1205.72  15
   0  -3 -10 30.8398 185.984  27
   0  -3 -10 464.173 433.919  31
   0  -3 -10 75.6215 103.334  17
   0  -3 -10 591.447 654.179  15
   0  -3 -10 37.1201 345.625  16
   0  -3  -9 57697.3 3040.52  27
   0  -3  -9 51097.2 3595.60  31
   0  -3  -9 60539.7 3158.28  16
   0  -3  -9 60395.9 4125.82  15
   0  -3  -9 55483.6 2927.48  17
   0  -3  -8 92.0638 344.260  28
   0  -3  -8 65.8031 137.298  26
   0  -3  -8 160.873 677.001  15
   0  -3  -8 84.8902 99.7866  17
   0  -3  -8 81.1248 361.063  16
   0  -3  -8 187.341 414.435  31
   0  -3  -7 131998. 6915.49  31
   0  -3  -7 124787. 6285.85  23
   0  -3  -7 130030. 7671.63  15
   0  -3  -7 124738. 6249.92  17
   0  -3  -6 52.2098 126.873  23
   0  -3  -6 47.4422 100.145  17
   0  -3  -6 176.900 744.440  15
   0  -3  -5 6205.51 458.794  23
   0  -3  -5 7308.44 1533.10  15
   0  -3  -5 6247.66 438.245  17
   0  -3  -4 108.802 124.672  23
   0  -3  -4 15.1380 94.7455  17
   0  -3  -4 198.241 1048.28  15
   0  -3  -3 118612. 5718.49  23
   0  -3  -3 114836. 7465.72  15
   0  -3  -3 109612. 5704.29  17
   0  -3  -3 116788. 5738.14  26
   0  -3  -2 98.0404 118.163  23
   0  -3  -2 249.296 82.9577  17
   0  -3  -2-443.165 1025.97  15
   0  -3  -2 119.115 126.453  26
   0  -3  -2-73.2927 291.863  28
   0  -3  -1 23968.7 1268.44  23
   0  -3  -1 23575.4 2736.86  15
   0  -3  -1 23064.2 1273.51  17
   0  -3  -1 23046.7 1281.72  25
   0  -3  -1 22642.5 1715.19  28
   0  -3  -1 23981.4 1299.96  26
   0  -3   0-30.4886 107.215  25
   0  -3   0-12.6575 95.5205  23
   0  -3   0 334.603 91.1060  17
   0  -3   0-490.165 1206.49  15
   0  -3   0-16.4502 125.112  26
   0  -3   0 70.8579 255.991  28
   0  -3   1 17592.5 993.189  17
   0  -3   1 17795.3 2469.00  15
   0  -3   1 18494.3 1431.27  28
   0  -3   1 17482.8 996.482  25
   0  -3   2-15.3335 108.286  25
   0  -3   2 501.030 112.129  17
   0  -3   2 70.2884 235.306  28
   0  -3   3 122262. 6141.63  17
   0  -3   3 132991. 6719.94  28
   0  -3   3 122690. 6139.68  25
   0  -3   4 247.558 111.754  17
   0  -3   4 285.026 275.263  28
   0  -3   4 31.7638 106.461  25
   0  -3   5 2194.75 974.000  15
   0  -3   5 2383.89 520.692  28
   0  -3   5 2391.00 257.102  25
   0  -3   6 92.7364 130.962  24
   0  -3   6-172.640 799.337  15
   0  -3   6 147.292 293.166  28
   0  -3   6 16.7671 104.937  25
   0  -3   7 99268.2 5156.48  24
   0  -3   7 106165. 5186.31  25
   0  -3   8-68.2148 142.590  24
   0  -3   8 469.143 724.053  15
   0  -3   8 39.3598 356.467  16
   0   3   8-15.4683 110.758  36
   0   3   9 59909.6 3129.55  33
   0  -3   9 57446.1 3203.13  16
   0  -3   9 64121.7 4227.30  15
   0  -3   9 57525.9 3009.05  24
   0   3  10 229.531 207.658  33
   0  -3  10-145.066 326.624  16
   0  -3  10 720.882 622.512  15
   0  -3  10 76.2726 150.783  24
   0   3  11 6890.36 630.268  33
   0  -3  11 6543.72 506.863  24
   0  -3  11 6440.50 665.667  16
   0  -3  11 7174.97 1219.76  15
   0  -3  12 260.249 561.856  15
   0  -3  12 32.3645 270.676  16
   0  -3  12 202.344 122.960   4
   0   3  12 198.894 220.710  33
   0  -3  12 43.0267 164.985  24
   0  -3  12 112.401 146.241   9
   0   3  13 130549. 6356.57  33
   0  -3  13 127416. 6150.72   4
   0  -3  13 126095. 6135.93  24
   0  -3  13 131180. 7103.27  15
   0  -3  14 28.3024 239.788  16
   0   3  14 48.4045 272.506  33
   0  -3  14-25.8960 125.043   4
   0  -3  14 114.816 470.296  15
   0  -3  14 24.6990 187.783  24
   0  -3  14 274.217 169.486  10
   0  -3  15 56838.7 2942.55  10
   0  -3  15 53737.9 2863.80  35
   0   3  15 55173.9 3127.00  33
   0  -3  15 57036.0 2964.55   4
   0  -3  15 58603.8 2932.75  14
   0  -3  15 58505.1 2953.23  24
   0  -3  15 50616.1 3589.32  15
   0  -3  15 50450.6 2920.92  16
   0  -3  16 80.7538 139.213  35
   0   3  16 46.0582 239.470  33
   0  -3  16-297.058 468.332  15
   0  -3  16 78.1145 135.395  14
   0  -3  16 28.4801 202.066  24
   0  -3  16 244.662 222.710  10
   0  -3  17 59584.5 3365.11  10
   0  -3  17 61143.2 3272.52  35
   0   3  17 64386.8 3507.92  33
   0  -3  17 67592.6 3355.30  14
   0  -3  17 65355.9 4089.70  29
   0  -3  17 67457.9 3384.20  24
   0  -3  17 56944.3 3826.69  15
   0  -3  18 45.2474 139.916  35
   0   3  18 135.687 231.093  33
   0  -3  18 121.077 369.667  29
   0  -3  18 63.6998 210.845  10
   0  -3  18-97.8416 259.677  24
   0  -3  18 208.175 146.458  14
   0  -3  19 75573.0 3987.79  13
   0  -3  19 76178.8 3972.28  14
   0  -3  19 74437.5 3894.82  35
   0  -3  19 78858.7 4855.62  29
   0  -3  19 79523.1 4017.47  24
   0  -3  19 72267.1 4034.59  10
   0  -3  20 169.657 229.350  10
   0  -3  20 140.443 151.654  35
   0  -3  20 253.142 226.599  13
   0  -3  20 66.6284 167.178  14
   0   3  20-285.706 477.771  30
   0  -3  20 272.593 394.780  29
   0  -3  20 36.6929 274.431  24
   0  -3  20-41.2861 281.878  18
   0  -3  21 12767.8 992.882  10
   0  -3  21 13215.2 891.866  35
   0   3  21 14828.5 1654.64  30
   0  -3  21 16393.3 1733.36  29
   0  -3  21 14916.0 980.423  13
   0  -3  21 14511.0 978.705  14
   0  -3  21 15734.7 1050.18  24
   0  -3  21 15581.5 1082.07  18
   0  -3  22 315.491 302.235  18
   0  -3  22 144.152 173.890  13
   0   3  22-134.095 388.409  30
   0  -3  22 398.642 384.892  29
   0  -3  22 71.8059 247.583  24
   0  -3  22-65.9280 208.743  10
   0  -3  23 39148.6 2409.67  18
   0   3  23 40950.7 3121.86  30
   0  -3  23 38048.8 3068.40  29
   0  -3  23 44565.5 2343.72  13
   0  -3  23 44189.7 2413.56  24
   0  -3  23 44533.1 2393.02  10
   0  -3  24 109.886 245.021  18
   0  -3  24-25.5247 149.929  13
   0   3  24 124.071 359.361  30
   0  -3  24 33.4785 239.723  24
   0  -3  24 280.877 244.797  10
   0  -3  25 77029.7 3957.14  18
   0   3  25 62289.4 4531.10  30
   0  -3  25 75581.9 3839.21  13
   0  -3  25 73060.3 3910.53  24
   0  -3  25 75654.3 3905.34  10
   0  -3  26 199.067 230.998  18
   0   3  26-112.467 343.371  30
   0  -3  26 85.7275 138.833  13
   0  -3  26 91.1153 236.420  24
   0  -3  26-28.6762 183.666  10
   0  -3  27 312.398 225.840  18
   0   3  27 106.409 271.918  30
   0  -3  27 314.378 234.263  24
   0  -3  27 271.381 206.456  10
   0  -3  27 57.4629 124.310  13
   0  -3  28 116.649 195.255  18
   0  -3  28 132.964 208.758  24
   0  -3  28 177.995 175.533  10
   0  -3  28 231.521 134.814  13
   0  -3  29 46924.2 2491.37  18
   0  -3  29 46915.6 2463.73  10
   0  -3  29 44187.7 2453.41  24
   0  -3  30 148.534 174.003  18
   0  -3  30-67.0038 162.803  24
   0  -3  30 43.2125 173.280  10
   0  -3  31 30013.2 1600.54  10
   0  -3  31 27534.1 1587.89  24
   0   3  31 29386.0 1615.32  34
   0  -3  31 29107.4 1620.30  18
   0   3  32 117.708 146.768  34
   0  -3  32 20.0289 151.083  18
   0  -3  32 88.5756 141.096  24
   0  -3  32 122.079 153.451  10
   0  -3  33 2794.80 271.055  10
   0  -3  33 2633.12 267.488  24
   0   3  33 2273.49 261.762  34
   0  -3  33 2565.95 277.526  18
   0   3  34-29.0752 100.249  34
   0  -3  34-15.0635 106.885  18
   0  -3  34-25.7147 102.378  24
   0  -3  34-90.5271 119.771  10
   0  -3  35 16476.4 873.254  10
   0   3  35 16307.9 887.296  34
   0  -3  35 15292.5 886.322  18
   0   3  35 15250.0 879.304  35
   0  -3  36-47.7993 76.9465  10
   0  -4 -33 8.01138 64.2484   1
   0  -4 -32 6388.35 435.107  23
   0  -4 -32 6816.05 422.415   1
   0  -4 -31 92.3076 106.073  23
   0  -4 -31-89.3700 100.138   1
   0  -4 -30 324.499 128.384  23
   0  -4 -30 150.657 117.796   1
   0  -4 -29 41.0638 129.986  23
   0  -4 -29-69.5178 128.883   1
   0  -4 -28 14683.2 935.580  23
   0  -4 -28 15317.5 914.387   1
   0  -4 -27 76.3629 149.486  23
   0  -4 -27-110.716 154.163   1
   0  -4 -26 8346.79 672.476  23
   0  -4 -26 8815.80 635.544   1
   0  -4 -25 30.3854 203.242  23
   0  -4 -25-53.9144 164.602   1
   0  -4 -24 755.483 258.954  23
   0  -4 -24 938.657 256.611   1
   0  -4 -23-141.144 220.782  23
   0  -4 -23 221.731 198.195   1
   0  -4 -22 7874.39 674.168  23
   0  -4 -22 6248.07 605.629   1
   0  -4 -21 36.1800 215.326   1
   0  -4 -20 2472.40 400.530   1
   0  -4 -19 37.2764 215.937   1
   0  -4 -19 52.1754 326.453  27
   0  -4 -18 13474.5 971.951   1
   0  -4 -18 14180.0 1137.41  27
   0  -4 -17-150.858 436.933  31
   0  -4 -17 33.3243 193.043   1
   0  -4 -17 289.799 358.300  27
   0  -4 -16 10071.6 1478.21  31
   0  -4 -16 11672.6 837.917   1
   0  -4 -16 11402.9 1012.56  27
   0  -4 -15 475.936 459.511  31
   0  -4 -15-54.7203 303.518  27
   0  -4 -15 41.4278 256.144  23
   0  -4 -15 145.478 192.636   1
   0  -4 -14 4614.88 542.868  16
   0  -4 -14 2611.69 835.427  31
   0  -4 -14 4208.64 956.882  15
   0  -4 -14 4270.84 611.199  27
   0  -4 -14 6208.26 608.733  23
   0  -4 -14 4869.93 455.860   1
   0  -4 -13 77.2707 309.837  16
   0  -4 -13-168.766 515.238  31
   0  -4 -13-478.290 575.913  15
   0  -4 -13 402.922 315.123  27
   0  -4 -13 146.469 226.362  23
   0  -4 -13-50.1876 160.702   1
   0  -4 -12 21364.8 1359.65  16
   0  -4 -12 19067.8 2127.55  15
   0  -4 -12 18327.4 2146.38  31
   0  -4 -12 22137.1 1301.16  23
   0  -4 -12 17663.4 1153.86   1
   0  -4 -11-85.6299 360.353  16
   0  -4 -11 175.770 587.840  15
   0  -4 -11-63.8830 197.462  23
   0  -4 -11 107.855 136.570   1
   0  -4 -11-169.266 516.766  31
   0  -4 -10 20837.3 2404.23  15
   0  -4 -10 25107.1 1611.19  16
   0  -4 -10 23732.2 1428.97  17
   0  -4 -10 21539.4 2287.18  31
   0  -4 -10 28387.4 1502.31  23
   0  -4 -10 23376.5 1369.46   1
   0  -4  -9 147.415 146.244  17
   0  -4  -9-47.6682 390.506  16
   0  -4  -9 145.694 444.807  31
   0  -4  -9 194.257 726.351  15
   0  -4  -9 27.9093 166.120  23
   0  -4  -9 18.7693 120.229   1
   0  -4  -8 6484.36 1106.70  31
   0  -4  -8 7579.47 538.512  17
   0  -4  -8 6139.44 1334.42  15
   0  -4  -8 6648.86 761.467  16
   0  -4  -8 7129.53 653.273  27
   0  -4  -8 6633.77 550.780  23
   0  -4  -8 5811.63 471.595   1
   0  -4  -7-249.842 361.814  31
   0  -4  -7-215.911 807.318  15
   0  -4  -7-53.3740 437.243  16
   0  -4  -7 92.3186 133.706  17
   0  -4  -7-38.0486 254.504  27
   0  -4  -7 24.8312 162.605  23
   0  -4  -7 188.966 223.445   6
   0  -4  -6 95124.0 5743.01  31
   0  -4  -6 109499. 5320.84  16
   0  -4  -6 98638.9 4921.78  17
   0  -4  -6 96418.1 6644.45  15
   0  -4  -6 96049.6 4979.16  26
   0  -4  -6 99463.7 4936.12  23
   0  -4  -6 81727.7 5155.88   6
   0  -4  -5-107.261 401.076  31
   0  -4  -5 133.524 113.742  17
   0  -4  -5 240.689 837.828  15
   0  -4  -5 358.945 490.091  16
   0  -4  -5 120.752 329.752  28
   0  -4  -5-114.170 196.820  26
   0  -4  -5 202.446 153.600  23
   0  -4  -5 47.9379 126.796   9
   0  -4  -5 121.605 281.542   6
   0  -4  -4 40133.1 2946.80  31
   0  -4  -4 42927.3 4050.66  15
   0  -4  -4 44477.8 2346.45  17
   0  -4  -4 47401.8 2781.88  16
   0  -4  -4 46616.3 2410.98  26
   0  -4  -4 48938.9 3191.40  28
   0  -4  -4 44851.0 2349.09  23
   0  -4  -4 37934.4 2609.74   6
   0  -4  -4 42727.9 2355.71   9
   0  -4  -3-92.6993 346.670  31
   0  -4  -3 26.9779 166.891  26
   0  -4  -3 345.194 384.869  28
   0  -4  -3 531.792 1118.97  15
   0  -4  -3 306.831 123.538  17
   0  -4  -3-66.3257 558.263  16
   0  -4  -3 102.837 134.821  23
   0  -4  -3 322.916 279.878   6
   0  -4  -3 47.2715 125.142   9
   0  -4  -2 8065.44 638.646  26
   0  -4  -2 8368.44 1116.71  28
   0  -4  -2 7732.76 1730.30  15
   0  -4  -2 8540.03 1014.98  16
   0  -4  -2 8709.32 592.948  17
   0  -4  -2 8573.25 575.391  23
   0  -4  -2 7478.21 581.217   9
   0  -4  -2 6100.68 738.115   6
   0  -4  -1 25.8963 147.918  26
   0  -4  -1-223.277 340.832  28
   0  -4  -1 142.949 534.505  16
   0  -4  -1 572.356 1105.14  15
   0  -4  -1 197.677 114.204  17
   0  -4  -1-18.9355 122.644  23
   0  -4  -1 49.0473 259.362   6
   0  -4  -1 47.6539 119.540   9
   0  -4   0 8091.09 592.970  26
   0  -4   0 7199.59 1013.52  28
   0  -4   0 8232.56 1082.91  16
   0  -4   0 7365.40 1813.96  15
   0  -4   0 8324.35 564.352  17
   0  -4   0 7425.30 531.849  23
   0  -4   0 6697.46 718.893   6
   0  -4   0 7057.52 565.246   9
   0  -4   1-25.3946 138.811  26
   0  -4   1 110.227 301.049  28
   0  -4   1 224.886 106.523  17
   0  -4   1-285.048 1065.84  15
   0  -4   1 195.887 118.009  23
   0  -4   1-91.2056 220.210   6
   0  -4   1 98.9269 112.144   9
   0  -4   2 8948.15 614.074   4
   0  -4   2 7924.05 1070.62  28
   0  -4   2 9378.20 659.521  26
   0  -4   2 9757.68 641.846  17
   0  -4   2 8321.20 581.875  23
   0  -4   2 8163.13 768.249   6
   0  -4   2 9144.34 652.100   9
   0  -4   3 149.381 112.976   4
   0  -4   3 25.3403 150.906  26
   0  -4   3 110.288 353.182  28
   0  -4   3 421.300 131.871  17
   0  -4   3-48.0824 148.717  25
   0  -4   3 34.2924 119.493  23
   0  -4   3 43.3426 196.343   6
   0  -4   3 130.270 120.754   9
   0  -4   4 49403.7 2467.15   4
   0  -4   4 47756.9 2483.91  25
   0  -4   4 46834.2 3197.92  28
   0  -4   4 46894.4 2497.43  26
   0  -4   4 48225.9 2487.31  17
   0  -4   4 50984.0 2886.84  16
   0  -4   4 43258.7 2401.93  23
   0  -4   4 41729.1 2612.89   6
   0  -4   4 45371.2 2500.09   9
   0  -4   5 110.583 126.427   4
   0  -4   5 399.465 163.560  17
   0  -4   5-236.314 822.607  15
   0  -4   5-117.126 512.007  16
   0  -4   5 51.5494 159.418  26
   0  -4   5-112.113 324.753  28
   0  -4   5 152.833 126.034  23
   0  -4   5 24.5331 149.887  25
   0  -4   5 56.0868 129.946   9
   0  -4   6 98294.3 4968.50   4
   0   4   6 92889.5 5083.03  33
   0  -4   6 103713. 5014.58  17
   0  -4   6 106026. 5320.60  16
   0  -4   6 96567.4 6699.06  15
   0  -4   6 96346.1 5762.58  28
   0  -4   6 103628. 5000.93  25
   0  -4   6 100620. 5014.94  26
   0  -4   6 91390.1 4904.87  23
   0  -4   6 95052.1 5027.70   9
   0  -4   7-70.3627 139.591   4
   0   4   7 233.265 225.207  33
   0  -4   7 52.0394 411.240  16
   0  -4   7 849.109 869.486  15
   0  -4   7 53.9086 144.895  17
   0  -4   7-115.838 295.887  28
   0  -4   7 127.173 149.372  25
   0  -4   7 61.1826 150.601   9
   0   4   8 5028.12 590.917  33
   0  -4   8 5631.05 1292.33  15
   0  -4   8 6632.83 749.560  16
   0  -4   8 6808.10 540.970  17
   0  -4   8 5215.93 912.918  28
   0  -4   8 6329.97 513.738  25
   0  -4   8 5941.21 548.458   9
   0  -4   8 6084.46 496.934   4
   0  -4   9 101.142 124.477   4
   0   4   9 89.0231 254.232  33
   0  -4   9-191.469 784.255  15
   0  -4   9 58.7639 147.398  17
   0  -4   9-140.981 413.335  16
   0  -4   9-121.376 310.032  28
   0  -4   9-26.8156 157.476  25
   0  -4   9-33.4051 157.996   9
   0  -4  10 18984.1 2225.33  15
   0  -4  10 24304.7 1358.41  17
   0  -4  10 22763.9 1471.16  16
   0   4  10 19609.3 1426.83  33
   0  -4  10 20139.8 1921.40  28
   0  -4  10 22032.7 1294.19  25
   0  -4  10 20902.1 1270.13   4
   0  -4  10 19506.4 1334.56   9
   0  -4  11 192.865 178.275  17
   0  -4  11-42.5783 360.710  16
   0   4  11 51.3356 257.530  33
   0  -4  11-348.335 713.388  15
   0  -4  11 127.463 369.172  28
   0  -4  11 28.6045 148.721  25
   0  -4  11 55.1212 155.155   4
   0  -4  11-72.2539 181.237   9
   0   4  12 19712.8 1416.97  33
   0  -4  12 20954.2 1245.85  25
   0  -4  12 20655.1 1933.14  28
   0  -4  12 18602.9 1209.20   4
   0  -4  12 20666.3 2185.22  15
   0  -4  12 19510.9 1339.36  16
   0  -4  13 38.6252 302.970  16
   0   4  13 51.5257 267.910  33
   0  -4  13-317.541 718.968  15
   0  -4  13-133.783 387.494  28
   0  -4  13 61.7704 171.331  25
   0  -4  13 212.467 168.377   4
   0  -4  13 130.285 161.069  10
   0   4  14 4287.61 565.990  33
   0  -4  14 3472.48 905.072  15
   0  -4  14 3772.80 378.712  10
   0  -4  14 3396.81 422.556  25
   0  -4  14 4506.77 893.286  28
   0  -4  14 4050.75 435.344   4
   0  -4  14 3299.10 488.330  16
   0  -4  15-137.031 292.101  16
   0   4  15 48.6868 244.243  33
   0  -4  15 115.921 155.783  14
   0  -4  15-141.477 473.151  15
   0  -4  15 138.543 353.882  28
   0  -4  15 133.528 208.866  25
   0  -4  15 24.7549 162.098  10
   0  -4  15-66.8161 164.465   4
   0   4  16 11166.3 929.209  33
   0  -4  16 11346.5 846.860  25
   0  -4  16 10439.8 1347.66  28
   0  -4  16 11015.6 795.060  10
   0  -4  16 11740.0 815.468  14
   0  -4  16 11296.5 841.562  24
   0  -4  16 13709.0 1502.64  15
   0  -4  17 186.789 170.071  14
   0  -4  17 70.0110 243.739  24
   0  -4  17 27.9186 196.270  10
   0  -4  17 255.299 348.593  28
   0  -4  17-35.6629 200.805  25
   0  -4  18 14280.1 982.406  24
   0  -4  18 14932.5 1004.70  13
   0  -4  18 12903.5 915.266  14
   0  -4  18 12023.5 906.709  10
   0  -4  18 12756.3 945.918  25
   0  -4  19 32.8620 155.438  14
   0  -4  19 72.4164 249.648  13
   0  -4  19 187.450 275.653  24
   0  -4  19 61.6520 212.541  10
   0  -4  19-37.3898 207.373  25
   0  -4  20 3594.86 409.917  14
   0  -4  20 3346.92 438.075  13
   0   4  20 2679.03 749.587  30
   0  -4  20 3567.40 427.826  25
   0  -4  20 3071.07 447.554  24
   0  -4  20 2772.65 395.067  10
   0   4  21-44.7345 308.440  34
   0  -4  21 32.1375 203.477  13
   0  -4  21 156.416 154.029  14
   0  -4  21 202.334 200.715  25
   0  -4  21 153.080 274.024  24
   0  -4  21-158.066 226.365  10
   0   4  22 2630.59 439.754  34
   0  -4  22 1932.46 324.488  13
   0  -4  22 2279.31 323.988  25
   0  -4  22 2290.99 384.098  24
   0  -4  22 2097.03 334.296  10
   0   4  23 270.687 261.331  34
   0  -4  23-109.090 170.638  13
   0  -4  23-114.147 158.266  25
   0  -4  23 133.250 242.810  24
   0  -4  23 28.1246 199.529  10
   0   4  24 1241.44 319.642  34
   0  -4  24 1577.56 263.519  13
   0  -4  24 1678.00 259.828  25
   0  -4  24 1565.62 314.838  24
   0  -4  24 1869.20 305.506  10
   0   4  25-32.4088 229.926  34
   0  -4  25 43.9693 147.054  13
   0  -4  25-68.8439 140.124  25
   0  -4  25 196.127 198.778  24
   0  -4  25 119.180 176.764  10
   0   4  26 7353.21 613.801  34
   0  -4  26 6510.02 540.789  10
   0  -4  26 8195.98 551.039  13
   0  -4  27-133.169 123.611  13
   0  -4  28 13990.4 810.146  13
   0  -4  29 43.3470 89.4134  13
   0  -4  30 268.798 126.392  17
   0  -4  31 48.8482 88.9566  17
   0  -4  32 4510.39 337.891  17
   0  -5 -22 114.490 187.498  23
   0  -5 -21 2690.63 368.278  23
   0  -5 -20 104.222 206.816  23
   0  -5 -19 7379.21 670.589  23
   0  -5 -18 82.3502 235.209  23
   0  -5 -17 1074.03 317.479  23
   0  -5 -17 836.403 339.105  27
   0  -5 -16-122.588 261.764  23
   0  -5 -16-157.284 320.187  27
   0  -5 -15 921.089 287.603  23
   0  -5 -14-77.8168 225.412  23
   0  -5 -13 1726.12 353.725  23
   0  -5 -12-41.2563 119.507   1
   0  -5 -12 108.034 240.879  23
   0  -5 -12-524.631 653.886  15
   0  -5 -11 4259.68 1082.07  15
   0  -5 -11 2657.62 479.836  16
   0  -5 -11 2991.36 540.062  27
   0  -5 -11 3136.09 408.874  23
   0  -5 -11 2793.67 299.293   1
   0  -5 -10 271.405 335.597  27
   0  -5 -10-233.698 340.722  16
   0  -5 -10 164.358 200.785  23
   0  -5 -10 195.277 625.296  15
   0  -5  -9 1965.15 463.980  27
   0  -5  -9 1923.85 484.497  16
   0  -5  -9 2193.34 341.096  23
   0  -5  -9 2261.47 893.360  15
   0  -5  -8 103.811 300.677  27
   0  -5  -8 147.628 173.406  17
   0  -5  -8-51.9941 434.725  16
   0  -5  -8 29.8919 175.558  23
   0  -5  -8-432.083 722.524  15
   0  -5  -7 709.317 337.365  27
   0  -5  -7 727.000 216.976  17
   0  -5  -7 984.180 476.512  16
   0  -5  -7 744.267 230.865  23
   0  -5  -7 1133.01 819.393  15
   0  -5  -6 236.898 855.754  15
   0  -5  -6 57.5192 149.528  17
   0  -5  -6-114.494 417.269  16
   0  -5  -6 198.185 266.330  27
   0  -5  -6 110.215 155.117  23
   0  -5  -6-69.7655 171.725   9
   0  -5  -5 496.286 795.979  15
   0  -5  -5 1081.61 494.558  16
   0  -5  -5 1058.75 239.214  17
   0  -5  -5 872.710 331.108  27
   0  -5  -5 902.696 208.964  23
   0  -5  -5 1111.35 259.767   9
   0  -5  -4-516.715 864.041  15
   0  -5  -4 62.6227 452.427  16
   0  -5  -4-85.6801 169.973  17
   0  -5  -4 142.445 275.043  27
   0  -5  -4 128.276 150.662  23
   0  -5  -4-69.4365 222.336   9
   0  -5  -3-269.080 1039.28  15
   0  -5  -3 400.289 164.378  17
   0  -5  -3 195.904 504.702  16
   0  -5  -3 480.419 211.904  26
   0  -5  -3 842.201 344.527  27
   0  -5  -3 315.693 457.555  28
   0  -5  -3 597.403 191.662  23
   0  -5  -3 138.954 184.647   9
   0  -5  -2 28.4056 145.115   4
   0  -5  -2 278.333 930.847  15
   0  -5  -2 28.8542 139.286  17
   0  -5  -2-270.156 560.910  16
   0  -5  -2 137.939 270.017  27
   0  -5  -2-109.184 216.598  26
   0  -5  -2-155.321 424.128  28
   0  -5  -2 24.1477 168.115  23
   0  -5  -2 103.997 173.903   9
   0  -5  -1 255.402 157.823   4
   0  -5  -1-286.153 1070.02  15
   0  -5  -1 145.408 164.134  17
   0  -5  -1 208.213 514.812  16
   0  -5  -1 459.662 443.929  28
   0  -5  -1 135.823 269.698  27
   0  -5  -1 430.792 232.793  26
   0  -5  -1 351.819 169.859  23
   0  -5  -1 139.543 187.890   9
   0  -5   0 28.3913 145.047   4
   0  -5   0-292.527 978.318  15
   0  -5   0-29.5345 148.168  17
   0  -5   0 141.781 516.714  16
   0  -5   0-151.663 463.023  28
   0  -5   0 35.5111 208.544  26
   0  -5   0 133.941 265.713  27
   0  -5   0 137.121 136.016  23
   0  -5   0 140.695 176.457   9
   0  -5   1 255.722 150.703   4
   0  -5   1 285.857 1032.67  15
   0  -5   1 219.683 281.612  27
   0  -5   1 527.125 227.890  26
   0  -5   1 301.089 411.252  28
   0  -5   1 149.543 158.586  17
   0  -5   1-138.547 518.173  16
   0  -5   1 267.187 153.957  23
   0  -5   1 178.019 172.263   9
   0  -5   2-85.2255 139.849   4
   0  -5   2-149.955 383.030  28
   0  -5   2-104.644 210.305  26
   0  -5   2 182.117 173.363  17
   0  -5   2 21.6807 138.843  23
   0  -5   2 36.1333 174.421   9
   0  -5   3 370.791 165.597   4
   0  -5   3 310.099 177.469  17
   0  -5   3 149.666 354.109  28
   0  -5   3 312.495 198.631  26
   0  -5   3 42.3542 170.198  23
   0  -5   3 367.755 197.996   9
   0  -5   4-255.575 1017.35  15
   0  -5   4 62.9718 157.999  17
   0  -5   4 34.6229 180.047  26
   0  -5   4 149.729 408.876  28
   0  -5   4 57.6134 154.894   4
   0  -5   4 187.219 177.139   9
   0  -5   5 487.909 818.129  15
   0  -5   5 1503.86 267.287  17
   0  -5   5 1059.55 462.181  16
   0  -5   5 1353.23 282.839  26
   0  -5   5 900.724 484.507  28
   0  -5   5 1338.08 249.101   4
   0  -5   5 1031.06 287.269   9
   0  -5   6 232.944 871.002  15
   0  -5   6-97.7942 157.357  17
   0  -5   6-56.1778 437.264  16
   0  -5   6-69.2444 183.080  26
   0  -5   6-150.547 411.093  28
   0  -5   6 58.9115 150.479   4
   0  -5   6 116.938 172.452   9
   0  -5   7 221.538 882.324  15
   0  -5   7 531.929 226.527  17
   0  -5   7 693.804 422.737  16
   0  -5   7 754.791 461.776  28
   0  -5   7 552.890 237.663  26
   0  -5   7 685.727 199.437   4
   0  -5   7 556.014 225.434   9
   0  -5   8 845.184 735.505  15
   0  -5   8-50.8949 390.003  16
   0  -5   8-67.7768 176.188  17
   0  -5   8-34.6012 188.970  26
   0  -5   8 151.403 326.846  28
   0  -5   8 60.5014 151.756   4
   0  -5   8 80.8263 191.141   9
   0  -5   9 2930.55 394.480  26
   0  -5   9 2424.28 716.733  28
   0  -5   9 2611.66 941.681  15
   0  -5   9 2836.25 385.586  17
   0  -5   9 3238.26 557.798  16
   0  -5   9 3422.53 376.922   4
   0  -5  10 103.029 187.582  26
   0  -5  10 302.348 326.364  28
   0  -5  10-572.833 737.382  15
   0  -5  10 45.8689 340.160  16
   0  -5  10 70.7114 170.694  17
   0  -5  10 31.3873 154.542   4
   0  -5  11 2783.52 391.950  17
   0  -5  11 3130.67 511.476  16
   0  -5  11 2701.11 736.981  28
   0  -5  11 2244.94 362.841  26
   0  -5  11 3443.33 935.717  15
   0  -5  11 3177.13 398.718  25
   0  -5  11 2853.47 369.150   4
   0  -5  12-73.8223 170.901  17
   0  -5  12-164.714 310.497  16
   0  -5  12 147.957 349.892  28
   0  -5  12-33.4385 196.367  26
   0  -5  12 171.626 683.173  15
   0  -5  12 68.2117 197.562  25
   0  -5  12 32.7115 164.098   4
   0  -5  13 1057.48 267.057  17
   0  -5  13 914.339 242.296  26
   0  -5  13 485.187 766.348  15
   0  -5  13 1304.18 269.170  25
   0  -5  13 732.638 245.099   4
   0  -5  14-57.5762 152.243  14
   0  -5  14-150.374 502.908  15
   0  -5  14 137.755 175.947  25
   0  -5  14 192.074 209.806  17
   0  -5  14 28.4127 152.742  26
   0  -5  15 1551.53 345.039  13
   0  -5  15 1324.45 242.771  14
   0  -5  15 1649.87 314.814  25
   0  -5  15 1371.21 303.317  17
   0  -5  15 808.485 185.048  26
   0  -5  16 114.722 146.519  14
   0  -5  16-141.068 238.337  13
   0  -5  16-39.5898 198.605  17
   0  -5  16 68.1075 180.074  25
   0  -5  17 2411.66 313.479  14
   0  -5  17 2576.61 386.593  13
   0  -5  17 2076.09 372.853  17
   0  -5  17 2240.64 345.051  25
   0  -5  18-31.5284 208.690  13
   0  -5  18-111.312 163.438  14
   0  -5  18-60.8758 183.530  25
   0  -5  18 119.643 192.528  17
   0  -5  19 4923.36 481.866  25
   0  -5  19 5974.16 497.684  14
   0  -5  19 6401.67 535.024  13
   0  -5  19 4625.55 548.265  17
   0  -5  20 162.273 190.092  13
   0  -5  20 210.286 142.670  14
   0   5  20-37.7015 254.790  34
   0  -5  20-121.001 173.273  25
   0  -5  20-76.5574 209.055  17
   0  -5  21 1968.56 332.203  17
   0  -5  21 2723.55 328.509  13
   0   5  21 2581.25 393.048  34
   0  -5  22 124.155 164.142  17
   0  -5  22-66.4679 157.197  13
   0   5  22 121.146 212.877  34
   0  -5  23 495.552 176.538  17
   0  -5  23 566.890 180.241  13
   0   5  23 752.181 236.524  34
   0  -5  24-48.4440 132.285  17
   0  -5  24 16.9779 128.020  13
   0   5  24 141.110 163.732  34
   0  -5  25 1234.94 199.964  17
   0  -5  25 1239.87 180.301  13
   0   5  25 1264.96 224.054  34
   0  -5  26 143.227 102.281  17
   0  -5  26 35.4030 96.6994  13
   0   5  26-69.8570 130.621  34
   0  -5  27 2633.62 252.457  17
   0   5  27 3069.17 275.136  34
   0  -5  27 2632.53 218.096  13
   0   5  28 12.0860 80.0326  34
   0  -5  28-79.0100 59.8905  13
   0  -6 -23 83.4474 61.4881   4
   0  -6 -22 866.226 129.364   4
   0  -6 -21 39.9337 88.1240   4
   0  -6 -20 3151.65 289.415  23
   0  -6 -19 145.694 143.013  23
   0  -6 -18 1283.62 213.127  23
   0  -6 -17 208.967 155.633  23
   0  -6 -16 7409.24 577.588  23
   0  -6 -15 76.2356 164.617  23
   0  -6 -14 1798.44 286.440  23
   0  -6 -13-25.7346 162.925  23
   0  -6 -12 434.959 182.417  23
   0  -6 -12 307.183 185.714   4
   0  -6 -11 25.2465 154.170  23
   0  -6 -11 140.697 153.695   4
   0  -6 -11-81.2529 254.198  27
   0  -6 -10 9729.26 700.260  23
   0  -6 -10 10782.3 736.646   4
   0  -6 -10 8315.58 795.949  27
   0  -6  -9 267.314 170.886  23
   0  -6  -9 56.7047 152.498   4
   0  -6  -9-44.5508 268.657  27
   0  -6  -8 1612.69 249.880  23
   0  -6  -8 1356.22 363.604  27
   0  -6  -8 1645.35 274.917   4
   0  -6  -7-141.569 325.364  27
   0  -6  -7 141.795 168.794   4
   0  -6  -6 2122.08 442.955  27
   0  -6  -6 3450.73 369.259   4
   0  -6  -5-187.710 310.598  27
   0  -6  -5 56.4076 158.770   4
   0  -6  -4 5269.50 670.271  27
   0  -6  -4 7651.81 584.355   4
   0  -6  -3 509.597 279.436  27
   0  -6  -3 141.007 144.310  17
   0  -6  -3 112.351 167.368   4
   0  -6  -2 3623.16 526.954  27
   0  -6  -2 3845.76 407.365  17
   0  -6  -2 4552.87 433.526   4
   0  -6  -1 45.0553 281.900  27
   0  -6  -1-28.4650 171.622  17
   0  -6  -1 84.4723 186.367   4
   0  -6   0 44.1153 279.767  27
   0  -6   0 314.690 171.048  17
   0  -6   0 592.292 202.606   4
   0  -6   1-128.629 283.875  27
   0  -6   1-198.014 198.947   4
   0  -6   1-114.954 188.312  17
   0  -6   2 2518.55 331.799   4
   0  -6   2 2456.88 322.702  17
   0  -6   2 2240.21 388.389  13
   0  -6   3 311.197 197.139   4
   0  -6   3 116.418 159.178  17
   0  -6   3 147.751 244.628  13
   0  -6   4 6134.74 522.403   4
   0  -6   4 6651.35 535.986  17
   0  -6   5 113.437 147.468   4
   0  -6   5 59.0513 166.237  17
   0  -6   5-71.9225 235.488  13
   0  -6   6 4565.28 421.992   4
   0  -6   6 3745.35 408.385  17
   0  -6   6 3037.69 447.312  13
   0  -6   7-28.4030 162.228   4
   0  -6   7-29.9028 158.126  17
   0  -6   7 33.8237 221.476  13
   0  -6   8 1953.69 292.337   4
   0  -6   8 2315.90 310.133  17
   0  -6   8 1427.74 309.578  13
   0  -6   9-28.2225 170.159   4
   0  -6   9 30.0409 150.703  17
   0  -6   9 93.6397 227.510  13
   0  -6  10 9913.60 697.165   4
   0  -6  10 7989.48 674.643  13
   0  -6  10 8790.05 683.186  17
   0  -6  11 113.342 189.541  13
   0  -6  11-23.0127 140.533  14
   0  -6  11 120.288 159.034  17
   0  -6  12 160.359 201.649  13
   0  -6  12 66.7841 123.663  14
   0  -6  12 297.642 177.277  17
   0  -6  13 175.802 186.366  13
   0  -6  13 171.096 141.718  14
   0  -6  13 88.4363 145.278  17
   0  -6  14 1689.63 238.898  14
   0  -6  14 1733.24 272.996  17
   0  -6  15 75.9991 124.410  14
   0  -6  15-56.2451 133.011  17
   0  -6  16 8032.53 542.518  14
   0   6  16 8373.73 667.918  34
   0  -6  16 7632.05 608.304  17
   0   6  17-104.505 207.996  34
   0  -6  17 51.7049 134.409  17
   0  -6  17-13.4433 88.9787  14
   0  -6  17-18.5019 136.037  13
   0   6  18 1315.21 251.747  34
   0  -6  18 1264.89 212.649  17
   0  -6  18 1476.17 210.837  13
   0   6  19-120.257 174.164  34
   0  -6  19 137.444 112.167  17
   0  -6  19 44.8483 119.906  13
   0   6  20 2756.79 288.816  34
   0  -6  20 2419.60 254.760  17
   0  -6  20 2924.30 257.557  13
   0  -6  21 22.5589 91.1259  13
   0   6  21 57.6285 113.012  34
   0  -6  22 1438.16 154.010  13
   0  -6  23 113.692 64.2238  13
   0  -7 -12-47.9534 63.5201   4
   0  -7 -11 2303.57 212.969   4
   0  -7 -10 66.4379 93.4467   4
   0  -7  -9 17227.2 968.476   4
   0  -7  -8-14.8957 96.4720   4
   0  -7  -7 7354.59 496.305   4
   0  -7  -6-63.8154 107.861   4
   0  -7  -5 2350.18 250.279   4
   0  -7  -4 281.400 154.716   4
   0  -7  -3 14921.0 878.062   4
   0  -7  -2 608.412 140.612   4
   0  -7  -1 16515.1 956.191   4
   0  -7   0 677.494 175.382   4
   0  -7   1 15711.9 916.661   4
   0  -7   2 318.251 123.060   4
   0  -7   3 10273.7 648.142   4
   0  -7   4-12.6394 86.2867  14
   0  -7   5 2910.81 246.771  14
   0  -7   6 10.8395 71.7449  14
   0  -7   7 8725.29 517.361  14
   1   0 -38 69.0312 73.7548   1
   1   0 -37 75.9337 97.1896   1
   1   0 -14-382.827 418.560  31
   1   0 -13 374.655 409.624  31
   1   0 -12 220.778 414.420  31
  -1   0 -11 38.7707 88.2496   8
   1   0 -11 146.464 406.149  31
  -1   0 -10-18.7438 120.039   8
   1   0 -10-74.9535 490.788  31
   1   0  -9 190.800 411.998  31
   1   0  -8 510.586 430.445  31
   1   0  -7 681.220 353.996  31
   1   0  -6 61.3886 244.380  31
  -1   0  -5 54.1332 104.033  38
  -1   0  -4 152.930 135.521  38
   1   0  -3 40.7833 59.5650  28
  -1   0  -3 60.1011 147.314  38
  -1   0  -2 124.450 187.774  38
   1   0   0 160.016 71.7214  29
   1   0   1 32.2736 81.3722  29
  -1   0   1 193.677 189.582  38
   1   0   2 8.36213 83.8988  30
  -1   0   2-139.693 231.146  38
   1   0   3 24.0689 111.442  30
  -1   0   3-150.978 252.462  38
   1   0   4 108.407 154.121  30
  -1   0   4 40.7786 281.187  38
   1   0   5 78.5946 221.977  30
  -1   0   5 88.5132 280.207  38
   1   0   6 142.552 287.919  30
  -1   0   6 93.1626 298.359  38
   1   0   7-229.456 365.367  30
  -1   0   7 47.1053 287.648  38
   1   0   8-113.555 406.547  30
  -1   0   8 239.115 326.508  38
   1   0   9-340.850 431.581  30
  -1   0   9 48.2978 259.635  38
   1   0  10-359.015 459.837  30
  -1   0  10 117.816 124.361   8
   1   0  11-71.5475 402.772  30
  -1   0  11-30.8148 92.9066   8
   1   0  12 72.3830 401.451  30
   1   0  13 369.206 370.859  30
   1   0  14 302.641 450.278  30
   1   0  14-36.1186 171.715  34
   1   0  15 312.172 391.529  30
  -1   0  15 96.4301 181.828  20
  -1   0  15 58.1099 137.487  19
   1   0  16-80.5873 320.788  30
  -1   0  16 257.263 166.565  19
  -1   0  16-24.4478 154.782  20
  -1   0  16-33.2990 144.675  34
   1   0  17 166.781 360.044  30
  -1   0  17 101.750 136.124  19
  -1   0  17-24.8943 153.898  20
  -1   0  17-17.3871 142.442  34
  -1   0  18 181.387 170.254  34
  -1   0  18 439.938 177.928  19
  -1   0  18 87.8743 370.012  30
   1   0  18 86.5260 323.778  30
  -1   0  19 189.042 145.013  34
  -1   0  19 86.1048 145.627  19
   1   0  19 179.760 357.837  30
  -1   0  19 91.3564 341.656  30
  -1   0  20-58.9831 144.567  34
  -1   0  20 88.2530 139.686  19
  -1   0  20 95.2111 367.683  30
   1   0  20 187.020 337.791  30
  -1   0  21 20.4413 133.852  34
  -1   0  21-113.338 145.167  19
  -1   0  21 198.396 345.302  30
   1   0  21 97.3002 297.057  30
  -1   0  22 127.331 143.480  34
  -1   0  22 46.6517 135.183  19
  -1   0  22 103.230 372.923  30
   1   0  22 101.295 338.791  30
  -1   0  23-21.9767 140.738  34
  -1   0  23-47.8297 147.836  19
   1   0  23 210.371 351.778  30
  -1   0  23 107.402 311.069  30
   1   0  24-108.904 297.400  30
  -1   0  24-222.577 372.206  30
  -1   0  24-22.5890 160.297  34
   1   0  25-112.389 375.876  30
  -1   0  25-114.803 313.496  30
  -1   0  25-23.1940 145.135  34
  -1   0  26-117.719 321.449  30
   1   0  26 115.484 334.477  30
  -1   0  26-23.6734 174.059  34
   1   0  26 81.5333 187.379  34
   1   0  27-117.848 341.326  30
  -1   0  27-119.840 347.096  30
  -1   0  27 119.398 149.418  34
   1   0  27 27.5575 172.429  34
   1   0  28 153.004 163.322  35
   1   0  28-357.335 398.359  30
  -1   0  28-120.924 387.202  30
   1   0  28-27.6936 175.337  34
  -1   0  28 71.7516 146.054  34
   1   0  29 75.3662 159.047  35
  -1   0  29-41.2470 147.666  35
   1   0  29 118.484 379.385  29
   1   0  29-119.088 363.573  30
  -1   0  29 120.739 368.614  30
  -1   0  29 23.6600 153.234  34
   1   0  29 109.781 191.074  34
   1   0  30 73.5074 155.148  35
  -1   0  30 59.4392 132.557  35
  -1   0  30 357.798 325.688  30
   1   0  30 116.638 318.512  29
   1   0  30 117.539 340.441  30
   1   0  30 26.9374 170.560  34
  -1   0  30-46.0222 161.760  34
   1   0  31 164.710 155.790  35
  -1   0  31 18.7175 144.620  35
   1   0  31 114.336 382.403  30
   1   0  31-113.222 463.774  29
  -1   0  31 116.410 337.184  30
  -1   0  31 205.072 356.941  29
  -1   0  31 153.939 147.149  34
   1   0  31 26.0359 172.370  34
  -1   0  32-51.7335 114.160  35
   1   0  32 22.1827 152.958  35
  -1   0  32 195.625 313.203  29
   1   0  32-108.194 478.676  29
   1   0  32 219.229 409.867  30
  -1   0  32 224.007 324.405  30
  -1   0  32 20.6870 150.803  34
   1   0  32 222.349 165.264  34
  -1   0  33 57.0577 128.640  34
   1   0  33-92.3965 149.690  34
   1   0  34 55.9346 129.822  35
  -1   0  34-51.1400 125.356  34
   1   0  34-148.144 152.915  34
   1   0  35-82.5156 146.026  35
   1   0  35 18.9733 129.525  34
  -1   0  35 29.6095 116.995  34
   1   0  36-14.1349 99.3465  35
   1   0  36 116.372 117.943  34
  -1   0  36-94.3186 145.567  10
   1   0  37-70.6213 107.414  34
  -1   0  37-52.7449 114.615  10
   1   0  38-46.3019 86.5671  34
  -1   0  38 31.7606 99.0983  10
   1   0  39-20.4397 88.2495  24
  -1   0  39-38.7841 80.6558  10
   1   0  39 78.5343 89.9112  10
  -1   0  40 89.5356 73.1455  12
   1   0  40-42.5574 69.5003  10
  -1  -1 -40 1486.79 126.883   1
   1  -1 -39 2072.98 168.151   1
  -1  -1 -39 2311.42 189.952   1
   1  -1 -38 4899.58 332.769   1
   1  -1 -37 1161.20 167.676   1
   1  -1 -36 3004.87 281.504   1
   1  -1 -19 39910.1 2970.06  31
   1  -1 -18 5368.45 1020.96  31
   1  -1 -17 7865.39 1196.51  31
   1  -1 -16 52606.9 3663.36  31
   1  -1 -15 18228.9 1860.14  31
   1  -1 -14 57324.6 3825.36  31
   1  -1 -13 3174.81 504.685  15
   1  -1 -13 5324.41 907.425  31
   1  -1 -12 170.112 313.035  15
   1  -1 -12 540.224 407.982  31
  -1  -1 -11 10235.1 857.164  15
   1  -1 -11 14192.9 1232.08  31
  -1  -1 -10 2692.53 467.517  15
   1  -1 -10 4341.52 669.034  31
  -1  -1  -9 29333.5 2085.15  31
   1  -1  -9 33008.9 1995.49  31
  -1  -1  -9 28311.4 1825.64  15
  -1  -1  -8 6415.15 896.074  31
  -1  -1  -8 6853.46 744.930  15
   1  -1  -8 7778.19 667.597  28
  -1  -1  -7 51582.6 3157.33  31
  -1  -1  -7 52565.9 2997.05  15
   1  -1  -7 51635.1 2839.44  28
  -1  -1  -6 19013.1 1557.00  31
  -1  -1  -6 19923.5 1488.82  15
   1  -1  -6 20923.2 1264.37  28
  -1  -1  -5 15633.4 1358.41  31
  -1  -1  -5 18868.4 1417.48  15
   1  -1  -5 16142.0 1049.60  28
  -1  -1  -4 28874.9 2027.28  31
  -1  -1  -4 31353.6 2245.53   8
  -1  -1  -4 34389.8 2199.00  15
   1  -1  -4 29357.3 1702.32  28
  -1  -1  -3 99935.1 5460.61  31
  -1  -1  -3 102757. 5802.72   8
  -1  -1  -3 110202. 5731.75  15
   1  -1  -3 98185.1 5111.61  28
  -1  -1  -2 36503.1 2248.54  31
  -1  -1  -2 32785.2 1933.41  28
  -1  -1  -2 31966.4 2531.93   8
  -1   1  -1 11838.1 757.354  32
  -1  -1  -1 12543.5 1041.56  31
  -1  -1  -1 13983.9 1588.64  15
  -1  -1  -1 12633.7 818.492  28
  -1  -1   0 53037.7 2905.07  31
  -1   1   0 50515.4 2780.08  32
  -1  -1   0 56902.9 2821.37  28
  -1   1   1 8756.32 596.433  32
  -1  -1   1 8800.52 590.296  28
  -1   1   2 35489.9 1943.40  32
   1  -1   2 32772.3 1930.51  29
  -1  -1   2 34472.5 1863.79  30
  -1  -1   3 85187.6 5165.44   8
  -1  -1   3 88654.6 4511.52  30
  -1  -1   3 101516. 4513.49  28
  -1  -1   3 85896.6 4437.52  29
   1  -1   3 86158.6 4565.82  29
  -1  -1   4 30091.7 1690.94  30
  -1  -1   4 35038.6 2266.04   8
  -1  -1   4 31006.2 2201.38  15
   1  -1   4 30737.8 1751.66  30
  -1  -1   4 30732.9 1609.30  29
  -1  -1   5 15792.3 1017.00  30
  -1  -1   5 16309.7 1380.78   8
  -1  -1   5 14897.2 909.327  29
   1  -1   5 17987.9 1072.59  30
  -1  -1   5 16912.0 1413.37  15
   1  -1   6 16141.7 1047.70  30
  -1  -1   6 14802.7 915.925  29
  -1  -1   6 14795.2 1021.78  30
  -1  -1   6 14378.1 1256.37  15
   1  -1   7 56932.8 3123.41  30
  -1  -1   7 56672.3 3138.40  30
  -1  -1   7 57341.7 3266.15  15
   1  -1   8 8934.92 779.897  30
  -1  -1   8 7529.01 777.037  30
  -1  -1   8 9508.26 869.720  15
   1  -1   9 20894.9 1403.32  30
  -1  -1   9 17539.2 1297.22  15
  -1  -1   9 19335.4 1403.88  30
  -1  -1  10 2205.43 522.650  30
   1  -1  10 2212.11 495.781  30
  -1   1  10 1408.16 332.177  38
  -1  -1  10 1400.17 384.962  15
  -1  -1  11 12420.9 1111.57  30
  -1   1  11 12504.7 895.176  38
  -1  -1  11 11437.3 830.492  15
   1  -1  11 13611.7 1114.59  30
   1  -1  12 2312.33 592.167  30
  -1  -1  12 3330.54 686.237  30
   1   1  12 2079.27 506.917  30
  -1   1  12 2572.56 443.109  38
  -1  -1  12 2266.49 391.851  15
  -1  -1  13 9146.55 1045.39  30
   1  -1  13 9698.92 1113.75  30
   1   1  13 9888.52 1025.97  30
  -1  -1  13 11553.9 664.738  19
  -1   1  13 9104.48 870.400  38
   1   1  13 8852.42 657.130  34
   1   1  14 42430.2 2460.57  30
   1  -1  14 41042.3 2716.11  30
  -1  -1  14 45742.3 2615.52  30
  -1  -1  14 36329.9 1929.40  19
   1  -1  14 36664.5 1940.14  35
   1   1  14 37496.8 1962.60  34
  -1   1  14 38779.0 2274.75  38
   1   1  15 14194.6 833.695  34
  -1  -1  15 14624.7 1313.44  30
   1   1  15 15763.9 1263.27  30
   1  -1  15 15710.3 1560.27  30
  -1  -1  15 13082.3 793.716  19
  -1   1  15 11730.0 1051.25  38
   1  -1  15 15476.2 850.029  35
   1   1  16 44962.1 2767.10  30
  -1   1  16 40744.0 2356.86  33
  -1  -1  16 42178.3 2226.67  34
   1   1  16 42376.7 2269.25  34
   1  -1  16 46353.9 3120.32  30
  -1  -1  16 42105.5 2799.52  30
  -1   1  16 42464.3 2275.89  34
   1  -1  16 41726.7 2253.97  35
  -1   1  16 37190.7 2502.31  38
  -1   1  16 44411.2 2279.66  19
  -1   1  16 41107.1 2273.37  20
  -1  -1  16 42380.0 2245.51  19
   1   1  17 7128.89 548.583  34
   1   1  17 6982.67 884.354  30
  -1  -1  17 6778.03 508.319  34
  -1   1  17 5944.62 589.148  33
   1  -1  17 6460.28 529.500  35
  -1   1  17 6842.05 545.851  34
   1  -1  17 7110.25 1067.81  30
  -1  -1  17 7028.73 947.812  30
  -1   1  17 6921.45 536.292  19
  -1   1  17 5997.99 536.242  20
  -1  -1  17 7282.72 520.475  19
   1   1  18 5403.71 470.842  34
  -1   1  18 5008.25 456.347  34
  -1  -1  18 5040.19 423.416  34
  -1   1  18 5541.51 532.167  33
   1  -1  18 4709.68 429.995  35
  -1   1  18 6487.17 967.969  30
   1  -1  18 4942.52 882.605  29
   1   1  18 5405.36 793.622  30
   1  -1  18 6607.22 1021.84  30
  -1   1  18 4287.37 434.897  20
  -1   1  18 4619.17 433.147  19
   1  -1  19 40312.4 2704.18  30
   1  -1  19 35532.7 2541.66  29
  -1  -1  19 30898.5 1764.35  35
   1  -1  19 32872.8 1826.47  35
  -1   1  19 33339.2 1847.20  34
  -1  -1  19 33979.4 1813.23  34
  -1   1  19 33946.3 2522.43  30
   1  -1  19 34425.9 1856.27  34
   1   1  19 33860.1 2362.36  30
   1   1  19 34226.9 1854.80  34
  -1   1  19 32473.0 1824.01  19
   1   1  20 1005.23 399.925  30
   1  -1  20 1873.24 605.316  29
  -1   1  20 2380.00 631.927  30
   1  -1  20 1430.03 578.943  30
   1  -1  20 1179.93 231.636  35
  -1  -1  20 1391.14 210.719  35
  -1  -1  20 1575.14 248.387  34
   1   1  20 1526.21 269.093  34
   1  -1  20 1086.23 244.084  34
  -1   1  20 1250.57 252.461  34
  -1   1  20 1337.42 236.232  19
   1  -1  21 482.326 480.268  30
   1  -1  21 559.933 432.777  29
   1   1  21 665.930 367.748  30
  -1   1  21 230.161 385.224  30
  -1  -1  21 176.914 131.120  35
   1  -1  21 376.273 189.316  35
   1  -1  21 361.368 193.732  34
   1   1  21 182.701 190.956  34
  -1  -1  21 634.121 195.327  34
  -1   1  21 379.734 183.640  34
  -1   1  21 347.253 155.723  19
   1  -1  22 11731.6 1339.19  30
   1  -1  22 12526.1 1381.25  29
   1  -1  22 11564.1 748.487  35
  -1  -1  22 10272.6 687.643  35
  -1   1  22 11567.0 1328.49  30
   1  -1  22 10827.1 759.908  34
  -1   1  22 11240.0 760.700  34
   1   1  22 10093.7 1175.00  30
  -1  -1  22 10649.3 730.150  34
  -1   1  22 10444.7 729.679  19
   1  -1  23 8781.30 1140.50  29
   1  -1  23 6317.44 1089.74  30
   1   1  23 8724.88 1074.71  30
  -1   1  23 6877.86 1030.05  30
  -1  -1  23 7362.26 542.922  35
   1  -1  23 8264.27 601.469  35
  -1   1  23 7734.89 600.133  34
   1  -1  23 7446.98 606.281  34
  -1  -1  23 7768.88 581.642  34
  -1   1  23 8639.37 597.640  19
   1  -1  24 1171.92 473.608  29
   1  -1  24 1130.22 520.835  30
  -1   1  24 1317.44 510.601  30
  -1  -1  24 1753.07 504.220  29
   1   1  24 2333.50 575.986  30
   1  -1  24 1539.90 264.901  35
  -1  -1  24 1824.40 238.918  35
  -1  -1  24 1588.12 248.980  34
   1  -1  24 1900.66 309.872  34
  -1   1  24 1781.71 275.313  34
  -1   1  24 1761.80 263.248  19
   1  -1  25 3905.33 786.096  29
   1   1  25 5012.21 854.209  30
   1  -1  25 4067.08 822.156  30
  -1   1  25 3869.11 810.405  30
  -1  -1  25 3776.78 722.741  29
   1  -1  25 3980.08 407.718  35
  -1  -1  25 3956.85 370.707  35
   1  -1  25 5242.85 457.522  34
  -1   1  25 5206.70 458.546  34
  -1  -1  25 4044.24 392.249  34
  -1   1  25 4270.38 408.353  19
  -1  -1  26 2047.86 277.505  34
   1  -1  26 2237.41 329.565  34
  -1   1  26 2537.24 330.007  34
  -1  -1  26 1949.72 245.811  35
   1  -1  26 2385.73 305.101  35
   1  -1  26 2025.91 629.100  29
  -1  -1  26 2216.40 585.660  29
   1   1  26 2670.01 635.699  30
  -1   1  26 3770.98 768.872  30
   1  -1  26 3331.73 760.386  30
  -1  -1  27 346.718 176.390  34
  -1   1  27 525.211 192.031  34
   1  -1  27 248.580 173.499  34
   1  -1  27 318.209 179.081  35
  -1  -1  27 255.958 129.423  35
   1  -1  27 119.337 345.980  29
   1   1  27 1125.99 461.462  30
  -1  -1  27 303.692 324.506  29
   1  -1  27 385.864 372.846  30
  -1   1  27 121.833 333.042  30
  -1  -1  28 272.432 161.827  34
   1  -1  28 465.669 207.142  34
  -1   1  28 259.501 181.342  34
  -1  -1  28 354.988 132.557  35
   1  -1  28 217.230 150.032  35
  -1   1  28 484.589 405.464  30
  -1  -1  28 301.991 363.968  29
   1   1  28 450.486 326.563  30
   1  -1  28 513.081 371.841  30
   1  -1  28 355.782 396.931  29
   1  -1  29 8629.40 622.208  34
  -1   1  29 8410.37 610.800  34
  -1  -1  29 7105.39 560.337  34
  -1  -1  29 6856.43 520.035  35
   1  -1  29 8385.73 601.196  35
   1  -1  29 8173.10 1127.60  29
   1  -1  29 8873.54 1176.33  30
  -1  -1  29 7632.75 996.167  29
  -1   1  29 8124.73 1109.82  30
   1   1  29 7364.26 1039.49  30
  -1  -1  30 1057.63 207.846  34
  -1   1  30 972.376 220.752  34
   1  -1  30 678.134 215.169  34
   1  -1  30 1088.62 213.403  35
   1   1  30 1200.75 484.917  30
  -1  -1  30 481.582 338.112  29
   1  -1  30 682.285 427.434  29
   1  -1  30 867.589 449.848  30
  -1   1  30 815.748 392.183  30
  -1  -1  31 3981.99 358.382  34
  -1   1  31 3347.85 368.579  34
   1  -1  31 4066.57 396.627  34
   1  -1  31 3612.11 362.679  35
  -1  -1  31 2858.79 660.501  29
  -1   1  31 4382.78 765.012  30
   1  -1  31 3228.81 751.777  30
   1  -1  31 3502.15 707.732  29
   1   1  31 3787.28 740.125  30
   1  -1  32 5073.51 426.387  35
   1   1  32 5190.94 448.942  35
  -1  -1  32 4425.48 400.831  34
   1  -1  32 5310.94 463.270  34
   1   1  32 5428.60 464.136  34
  -1   1  32 5249.54 440.657  34
  -1   1  33 2886.92 299.243  35
   1  -1  33 2826.91 293.529  35
   1   1  33 3246.11 316.557  35
   1   1  33 2713.35 323.214  34
   1  -1  33 2866.55 315.484  34
  -1  -1  33 2517.30 274.227  34
  -1   1  33 2547.81 303.346  34
   1   1  34 554.776 166.076  35
   1  -1  34 398.630 129.013  35
  -1   1  34 187.871 119.284  35
  -1  -1  34 462.810 174.368  10
   1   1  34 166.822 144.786  34
  -1   1  34 406.002 155.269  34
   1  -1  34 493.645 169.230  34
   1   1  35 4754.16 377.617  35
  -1  -1  35 5438.60 422.162  10
   1   1  35 4265.70 382.717  34
   1  -1  35 4951.76 396.533  34
  -1   1  35 4678.67 371.454  34
   1   1  36 1642.61 208.958  35
  -1  -1  36 1733.64 234.938  10
  -1   1  36 1556.82 196.778  10
  -1   1  36 1807.02 200.840  34
   1  -1  36 1965.76 220.699  34
   1   1  36 2233.13 240.518  34
  -1   1  37 1094.28 145.755  10
  -1  -1  37 1329.10 189.856  10
   1  -1  37 1406.66 196.162  10
   1   1  37 1387.19 182.982  34
   1   1  37 970.061 153.709  35
  -1  -1  37 1364.94 173.581  24
   1  -1  37 1265.45 180.816  18
   1  -1  38 4847.50 328.885  10
   1   1  38 4043.52 309.142  34
  -1  -1  38 4397.40 306.909  12
  -1  -1  38 4757.40 322.592  10
   1   1  38 3688.57 288.356  35
  -1  -1  38 4011.14 302.034  24
   1  -1  38 4082.74 306.610  18
   1   1  39 1950.43 169.667  10
   1  -1  39 1998.98 190.086  10
  -1  -1  39 2053.72 182.778  10
   1  -1  40 1252.64 125.254  10
  -1  -1  40 1447.95 122.772  10
  -1  -2 -39 5361.41 316.888   1
   1  -2 -38 27030.0 1363.21   1
  -1  -2 -38 25818.7 1362.95   1
  -1  -2 -37 1155.01 158.584   1
   1  -2 -37 1722.62 181.358   1
   1  -2 -36 6138.43 383.625   1
   1  -2 -36 4175.68 341.174  23
   1  -2 -35 8168.38 505.722   1
   1  -2 -35 6230.68 475.249  23
   1  -2 -34 911.474 178.879   1
   1  -2 -33 7073.74 484.956   1
  -1  -2 -33 5058.16 418.551  23
  -1  -2 -32 17889.1 1053.51  23
  -1  -2 -31 9548.21 657.788  23
  -1  -2 -30 4008.37 400.081  23
   1  -2 -21 7708.53 1313.86  31
   1  -2 -20 9494.24 1438.12  31
   1  -2 -20 10374.0 822.429  27
   1  -2 -19 17056.7 2009.48  31
   1  -2 -19 18471.1 1230.38  27
   1  -2 -18 18591.1 2148.64  31
   1  -2 -18 23194.0 1439.05  27
   1  -2 -17 12974.8 1780.89  31
   1  -2 -17 12208.4 912.378  27
   1  -2 -16 134869. 6855.56  27
  -1  -2 -15 18805.0 1288.57  27
   1  -2 -15 20734.3 1241.52  27
  -1  -2 -15 19247.9 1488.91  15
  -1  -2 -14 27076.0 1606.58  27
   1  -2 -14 26981.2 1506.05  27
  -1  -2 -14 25693.8 2083.03  31
  -1  -2 -14 24311.0 1825.34  15
   1  -2 -13 51377.6 2627.11  27
  -1  -2 -13 51361.1 2760.20  27
  -1  -2 -13 43379.2 3189.88  31
  -1  -2 -13 50270.2 3066.35  15
   1  -2 -13 40676.6 3101.35  15
   1  -2 -12 24893.6 1389.68  27
  -1  -2 -12 24620.4 1506.14  27
  -1  -2 -12 25996.3 1887.58  15
   1  -2 -12 21112.3 1920.06  15
  -1  -2 -12 21061.3 1902.04  31
  -1  -2 -11 1992.99 361.105  27
  -1  -2 -11 2227.02 592.819  15
  -1  -2 -11 2145.85 631.109  31
   1  -2 -11 1358.96 628.831  15
   1  -2 -10 33722.0 1799.41  26
   1  -2 -10 35697.7 2251.68  28
  -1  -2 -10 33488.7 1921.65  27
  -1  -2 -10 32462.2 2459.00  31
   1  -2 -10 33366.3 2499.61  15
  -1  -2 -10 35339.1 2401.04  15
   1  -2  -9 33125.8 2239.64  28
  -1  -2  -9 36253.0 2604.67  31
  -1  -2  -9 39267.8 2570.72  15
   1  -2  -9 36300.8 2618.31  15
   1  -2  -8 11582.6 987.810  28
  -1  -2  -8 9836.60 1257.04  31
   1  -2  -8 11875.1 1389.16  15
  -1  -2  -8 9934.26 1222.62  15
   1  -2  -7 60020.9 3419.82  28
  -1  -2  -7 57661.5 3693.75  31
  -1  -2  -7 63567.5 3889.13  15
   1  -2  -6 139205. 7387.52  28
  -1  -2  -6 138959. 7633.48  31
  -1  -2  -6 155780. 8043.33  15
  -1  -2  -5 42095.9 2502.71  28
   1  -2  -5 40504.8 2379.56  28
  -1   2  -5 37986.4 2222.46  32
  -1  -2  -5 39119.9 2527.55  31
  -1  -2  -5 41740.0 3008.60  15
   1  -2  -4 119672. 6521.31  28
  -1  -2  -4 134199. 6654.13  28
  -1   2  -4 121028. 6380.12  32
  -1  -2  -4 124813. 6631.55  31
  -1  -2  -3 64586.9 3742.92  28
   1  -2  -3 70224.3 3732.46  28
  -1   2  -3 66676.9 3572.21  32
  -1  -2  -3 66088.0 3727.41  31
  -1  -2  -2 19314.3 1310.03  28
   1  -2  -2 16762.5 1247.97  28
  -1  -2  -2 18825.4 1252.15  31
  -1   2  -2 18371.2 1162.01  32
   1  -2  -1 13112.0 992.003  28
  -1  -2  -1 12353.9 969.477  28
  -1   2  -1 12891.7 879.688  32
  -1  -2  -1 12292.7 2004.24  15
  -1  -2   0 88377.7 4717.96  28
  -1   2   0 86803.0 4619.71  32
  -1   2   1 10241.6 808.803  32
  -1  -2   1 12203.9 884.617  28
  -1  -2   2 21874.9 1397.07  28
  -1  -2   3 77330.4 4108.86  28
  -1  -2   4 146147. 7825.16  15
  -1  -2   4 127785. 6712.84  28
  -1  -2   5 36845.3 2902.43  15
  -1  -2   5 36438.0 2124.82  28
  -1  -2   6 159192. 7691.67  15
   1  -2   6 123113. 6793.41  29
  -1  -2   7 48357.0 2809.41  30
   1  -2   7 48184.4 2857.72  29
  -1  -2   8 6650.03 1045.83  15
  -1  -2   8 7387.97 624.958  29
  -1  -2   8 7062.06 698.946  30
   1  -2   8 5936.39 689.166  29
  -1  -2   9 32459.6 2080.79  29
  -1  -2   9 38076.3 2273.64  30
   1  -2   9 36639.7 2277.48  29
  -1  -2   9 42061.3 2666.39  15
   1  -2   9 40914.0 2752.90  15
  -1  -2  10 27117.0 1720.57  29
   1  -2  10 27148.9 1884.88  29
  -1  -2  10 26512.1 1862.76  30
  -1   2  10 27973.9 1488.99  36
   1  -2  10 30561.8 2301.84  15
  -1  -2  10 32387.8 2174.49  15
   1   2  11 2069.01 333.259  33
  -1  -2  11 1613.20 578.884  15
  -1   2  11 1761.78 219.965  36
   1  -2  11 1699.98 221.118  35
   1  -2  11 2067.48 741.416  15
  -1  -2  11 2274.54 400.353  29
   1  -2  11 1414.12 444.790  29
  -1  -2  11 1807.29 463.477  30
   1   2  12 22417.6 1415.01  33
  -1   2  12 24632.0 1400.94  33
   1  -2  12 24095.5 1323.38  34
   1  -2  12 22475.0 1295.42  35
   1  -2  12 25537.6 2032.62  15
  -1  -2  12 21537.3 1743.80  15
   1  -2  12 23989.7 1768.23  29
  -1  -2  12 24470.6 1614.91  29
  -1  -2  12 25956.5 1830.51  30
   1  -2  12 27230.3 1918.84  30
  -1   2  13 45477.8 2403.16  33
   1   2  13 40039.9 2381.24  33
  -1  -2  13 43896.2 2259.80  34
   1  -2  13 44389.7 2307.15  34
   1  -2  13 42641.5 2279.09  35
  -1  -2  13 45070.9 2760.50  15
   1  -2  13 39485.5 2905.07  15
   1  -2  13 46918.6 2878.11  29
  -1  -2  13 47486.9 2919.04  30
   1  -2  13 47026.3 3003.93  30
  -1  -2  13 41622.6 2617.35  29
   1  -2  14 23606.2 1336.57  34
  -1  -2  14 23545.6 1291.04  34
  -1   2  14 23022.4 1427.07  33
   1  -2  14 23246.9 1311.77  35
  -1   2  14 22900.2 1686.23  38
   1  -2  14 20880.9 1844.02  15
  -1  -2  14 21376.1 1685.25  15
  -1  -2  14 23591.2 1897.24  30
   1  -2  14 25356.4 1900.19  29
  -1  -2  14 22806.4 1669.77  29
   1  -2  14 25854.5 2028.84  30
   1  -2  15 13964.3 903.051  34
  -1   2  15 15952.2 1028.98  33
  -1  -2  15 14239.5 859.547  34
  -1   2  15 13435.6 1196.68  38
   1  -2  15 14183.8 881.948  35
   1  -2  15 11318.0 1246.93  15
  -1  -2  15 13488.2 1197.65  15
  -1  -2  15 15708.3 1490.16  30
   1  -2  15 15007.1 1443.87  29
  -1  -2  15 12316.2 1213.36  29
   1  -2  15 14004.1 1541.85  30
  -1   2  16 116308. 5970.32  33
   1  -2  16 118070. 5827.93  34
  -1  -2  16 113818. 5761.51  34
   1   2  16 124465. 6555.56  30
  -1  -2  16 119871. 6352.07  29
   1  -2  16 110013. 6529.68  29
  -1  -2  16 121340. 6699.63  30
   1  -2  16 126363. 6896.66  30
   1  -2  16 111530. 5784.30  35
  -1   2  16 115364. 6227.43  38
  -1  -2  16 117793. 6096.81  15
   1  -2  16 97841.2 6180.32  15
   1  -2  17 7990.08 1156.53  29
  -1  -2  17 9044.00 1073.92  29
   1  -2  17 11832.0 1518.95  30
  -1  -2  17 11416.1 1387.18  30
  -1  -2  17 10216.9 726.712  14
   1   2  17 9493.05 1145.22  30
  -1   2  17 11221.7 897.333  33
   1  -2  17 11199.4 758.964  34
  -1  -2  17 9959.27 697.201  34
  -1   2  17 9191.80 974.018  38
   1  -2  17 9347.04 709.692  35
   1  -2  18 19907.7 1201.95  34
   1   2  18 16524.2 1638.49  30
  -1  -2  18 18309.2 1131.40  34
  -1   2  18 19899.8 1319.67  33
  -1  -2  18 18928.1 1170.28  14
  -1  -2  18 18157.8 1127.16  13
  -1  -2  18 15263.9 1565.80  29
  -1  -2  18 21055.6 1943.77  30
   1  -2  18 18038.6 1853.24  29
   1  -2  18 18517.6 2047.46  30
  -1   2  18 18775.3 1143.88  19
   1   2  18 19457.1 1208.20  34
   1  -2  18 17797.8 1147.68  35
  -1  -2  19 20723.1 1222.45  34
   1   2  19 20843.4 1282.10  34
   1  -2  19 20691.7 1268.43  34
   1   2  19 18961.3 1738.45  30
  -1   2  19 19658.4 1352.95  33
  -1  -2  19 20365.7 1200.88  13
  -1  -2  19 19962.0 1253.26  14
   1  -2  19 21696.9 2009.24  29
   1  -2  19 19735.7 2120.70  30
  -1  -2  19 21292.4 1949.25  30
  -1  -2  19 18632.3 1742.62  29
   1  -2  19 19438.9 1220.77  35
  -1   2  19 19021.5 1194.86  19
  -1   2  20 10749.4 883.180  33
   1  -2  20 10875.4 802.832  34
   1   2  20 10922.5 813.798  34
  -1  -2  20 9448.37 738.353  34
  -1  -2  20 10213.8 780.031  14
  -1  -2  20 12778.1 775.021  13
   1  -2  20 11494.4 1543.79  30
  -1  -2  20 10744.2 1233.45  29
   1   2  20 8756.29 1142.50  30
   1  -2  20 10156.7 1351.94  29
  -1  -2  20 11568.5 1387.71  30
  -1   2  20 11490.3 837.676  34
   1  -2  20 11633.2 779.146  35
  -1   2  20 9935.70 726.732  19
   1  -2  21 8624.37 661.548  34
  -1   2  21 8407.86 693.269  34
   1   2  21 7469.94 653.628  34
  -1   2  21 8827.05 765.139  33
  -1  -2  21 7936.92 614.504  34
  -1  -2  21 7836.25 590.187  13
  -1  -2  21 8381.75 1199.17  30
   1  -2  21 5370.53 1016.66  29
  -1   2  21 7997.62 1210.06  30
  -1  -2  21 6915.95 988.591  29
   1   2  21 7587.18 1031.62  30
   1  -2  21 7559.24 1279.82  30
   1  -2  21 7788.98 610.610  35
  -1   2  21 7274.39 578.995  19
  -1   2  22 28072.4 2518.30  30
  -1   2  22 31027.9 1857.12  34
   1   2  22 34006.7 2482.93  30
  -1  -2  22 32539.3 1803.67  34
   1   2  22 31547.0 1854.92  34
   1  -2  22 34278.2 1863.61  34
  -1  -2  22 34525.9 1788.07  13
  -1  -2  22 33140.5 2457.45  29
  -1  -2  22 35113.0 2666.70  30
   1  -2  22 29857.2 2557.52  29
   1  -2  22 32554.3 2766.75  30
   1  -2  22 31588.8 1802.74  35
  -1   2  22 29633.7 1752.49  19
  -1  -2  23 33164.9 2473.92  29
   1  -2  23 28525.4 2511.12  29
  -1  -2  23 34480.4 2681.53  30
   1  -2  23 37007.1 2871.37  30
  -1  -2  23 32746.4 1782.69  13
   1  -2  23 32736.8 1860.77  34
  -1  -2  23 31219.8 1804.73  34
  -1   2  23 30313.4 2581.05  30
   1   2  23 32560.3 2450.12  30
   1   2  23 34291.2 1884.57  34
  -1   2  23 31918.8 1874.09  34
   1  -2  23 31278.3 1809.11  35
  -1  -2  24 2394.15 673.315  30
   1  -2  24 3669.13 874.817  30
  -1  -2  24 2278.04 569.594  29
   1  -2  24 3262.06 782.165  29
   1   2  24 3553.26 707.177  30
  -1   2  24 3376.59 797.954  30
  -1  -2  24 3466.59 343.032  13
   1   2  24 3146.90 409.607  34
   1  -2  24 3344.71 410.537  34
  -1  -2  24 3554.29 375.117  34
  -1   2  24 3864.40 435.797  34
   1  -2  24 2749.63 337.176  35
  -1   2  25 5831.61 1046.10  30
  -1  -2  25 7824.05 1172.19  30
  -1  -2  25 7369.28 1011.67  29
   1   2  25 8627.40 1083.75  30
   1  -2  25 7713.67 1146.95  29
   1  -2  25 6142.86 1128.96  30
  -1  -2  25 8213.37 577.335  13
   1  -2  25 7704.24 602.674  35
   1  -2  25 8778.11 660.188  34
  -1  -2  25 7658.85 600.539  34
  -1   2  25 8127.37 652.351  34
   1   2  25 7543.03 644.515  34
   1  -2  26 22063.3 2011.65  29
  -1  -2  26 19964.2 1796.23  29
  -1  -2  26 18561.0 1957.23  30
   1  -2  26 21958.3 2112.91  30
   1  -2  26 21163.9 1259.46  35
   1  -2  26 22126.6 1314.01  34
   1   2  26 18993.9 1805.11  30
  -1   2  26 19694.4 1955.20  30
  -1  -2  26 20246.3 1250.15  34
  -1   2  26 22616.1 1328.55  34
   1   2  26 23010.6 1334.53  34
   1  -2  27 1139.57 621.147  30
  -1  -2  27 648.562 538.385  30
   1  -2  27 2208.29 654.548  29
  -1   2  27 1632.79 562.449  30
   1   2  27 2755.28 611.498  30
  -1  -2  27 1169.87 429.821  29
   1  -2  27 1859.56 265.675  35
   1   2  27 2080.96 335.710  34
  -1   2  27 2172.92 320.015  34
   1  -2  27 1532.31 286.144  34
  -1  -2  27 1943.27 273.508  34
   1  -2  28 32898.2 2546.02  29
   1  -2  28 33306.1 2685.74  30
  -1  -2  28 31527.1 2349.46  29
  -1  -2  28 29309.7 2523.86  30
   1  -2  28 30879.5 1752.79  35
   1  -2  28 33114.9 1812.76  34
  -1   2  28 33670.5 1824.80  34
   1   2  28 27436.4 2334.67  30
  -1   2  28 32203.5 2540.47  30
   1  -2  29 9797.57 1218.52  29
   1  -2  29 9495.61 1319.98  30
  -1  -2  29 10577.8 1315.84  30
   1  -2  29 10286.9 691.767  35
  -1   2  29 10257.5 1257.21  30
  -1   2  29 10129.6 732.232  34
   1  -2  29 11131.5 744.406  34
   1   2  29 9490.93 1141.10  30
   1  -2  30 4325.85 773.565  29
  -1   2  30 3220.21 700.892  30
  -1  -2  30 3532.47 740.584  30
   1  -2  30 3410.72 333.079  35
  -1   2  30 4084.70 399.885  34
  -1  -2  31 9177.09 643.998  24
   1  -2  31 8963.70 608.580  35
  -1   2  31 9772.67 662.247  34
  -1  -2  32 18842.4 1084.29  24
   1  -2  32 18090.6 1105.55  18
  -1   2  32 18199.4 1085.98  34
   1  -2  33 4826.73 410.712  18
  -1  -2  33 4023.57 375.807  24
  -1  -2  33 4486.10 415.759  10
  -1   2  33 4797.75 391.809  34
  -1  -2  34 240.932 159.594  10
   1  -2  34 793.180 188.770  10
  -1   2  34 508.387 150.195  34
   1   2  34 478.541 151.802  35
  -1  -2  34 430.980 143.824  24
   1  -2  34 412.455 152.000  18
   1  -2  35 5511.52 413.665  10
  -1   2  35 5091.52 385.344  34
   1   2  35 5213.76 403.713  35
  -1   2  35 5266.83 387.454  35
  -1  -2  35 6255.87 436.235  10
  -1  -2  35 5489.25 395.288  24
   1  -2  35 5336.14 410.629  18
   1  -2  36 3400.87 286.056  10
  -1   2  36 2735.06 253.636  34
   1   2  36 2896.26 268.491  34
   1   2  36 2929.74 265.852  35
  -1  -2  36 3202.53 285.852  10
   1  -2  36 3654.38 295.878  24
  -1  -2  36 2917.97 253.669  24
   1  -2  36 3321.34 282.652  18
   1  -2  37 1052.13 153.368  10
  -1  -2  37 975.648 157.838  10
   1   2  37 985.858 148.441  34
   1   2  37 1014.97 139.702  35
   1  -2  37 1119.37 152.915  24
   1  -2  37 1166.50 152.056  18
   1  -2  38 24046.1 1250.93  10
  -1  -2  38 24159.1 1253.62  10
  -1  -2  39 4856.36 260.774  10
   1  -2  39 3407.92 243.246  10
   1  -3 -37 4772.36 280.164   1
  -1  -3 -37 4262.62 268.874   1
  -1  -3 -36 3601.58 260.184   1
   1  -3 -36 3940.85 269.852   1
   1  -3 -35 24338.7 1239.33   1
  -1  -3 -35 26214.2 1239.71   1
  -1   3 -34 1811.24 187.307  37
   1  -3 -34 1889.28 214.797   1
  -1  -3 -34 2127.29 211.871   1
   1  -3 -34 1681.93 202.500  23
  -1  -3 -34 1430.99 168.595  23
  -1   3 -33 10557.5 663.657  37
   1  -3 -33 10215.6 686.908  23
  -1  -3 -33 9145.36 648.166  23
  -1  -3 -33 13022.2 692.603   1
   1  -3 -33 12563.0 694.968   1
  -1  -3 -32 23852.7 1475.00  23
   1  -3 -32 28323.6 1525.59  23
  -1  -3 -32 28979.7 1502.07   1
   1  -3 -32 29567.9 1516.14   1
  -1  -3 -31 16120.1 1046.64  23
   1  -3 -31 19304.8 1100.99  23
   1  -3 -31 19203.6 1076.34   1
  -1  -3 -30 11210.7 747.297  23
  -1  -3 -29 51969.7 2756.40  23
  -1  -3 -28 16420.2 1041.26  23
  -1  -3 -27 6429.32 564.285  23
  -1  -3 -26 8197.58 674.535  23
  -1  -3 -25 38890.5 2205.85  23
  -1  -3 -24 1310.67 295.297  23
  -1  -3 -23 63554.2 3433.73  23
  -1  -3 -22 57516.2 3160.03  23
   1  -3 -21 6781.61 694.035  27
   1  -3 -21 6300.37 1202.71  31
   1  -3 -20 26181.0 1684.78  27
   1  -3 -20 23581.5 2515.64  31
   1  -3 -19 103351. 5394.85  27
   1  -3 -19 94327.3 6449.66  31
   1  -3 -18 15367.3 1131.56  27
   1  -3 -18 12760.8 1841.26  31
   1  -3 -17 25126.3 1585.51  27
  -1  -3 -17 25157.9 1627.86  27
  -1  -3 -16 42560.9 2522.61  27
   1  -3 -16 42454.1 2447.67  27
   1  -3 -16 43578.1 3560.96  31
  -1  -3 -15 28493.6 2269.53  15
   1  -3 -15 23387.8 2266.31  15
   1  -3 -15 30687.6 1757.77  27
  -1  -3 -15 29020.2 1838.44  27
   1  -3 -15 25486.3 2540.16  31
  -1  -3 -14 30656.7 1832.75  27
   1  -3 -14 30885.9 1714.53  27
   1  -3 -14 26057.8 2455.84  31
  -1   3 -14 25684.3 1973.89  32
  -1  -3 -14 24691.3 2224.56  31
  -1  -3 -14 27590.5 2278.70  15
   1  -3 -14 24447.8 2345.28  15
   1  -3 -14 27547.1 1621.28   1
  -1  -3 -13 139747. 7608.11  15
   1  -3 -13 114599. 6784.06  16
   1  -3 -13 142013. 7882.73  15
  -1  -3 -13 145650. 6962.85  27
   1  -3 -13 140922. 6825.57  27
   1  -3 -13 142356. 7833.50  31
  -1  -3 -13 126647. 7551.28  31
  -1   3 -13 132204. 7140.83  32
  -1  -3 -13 137634. 6826.18  23
   1  -3 -13 133734. 6732.68   1
  -1  -3 -12 58682.9 3833.73  15
  -1  -3 -12 56656.0 3037.62  16
   1  -3 -12 53540.6 3992.75  15
  -1  -3 -12 51398.6 3720.38  31
   1  -3 -12 56754.7 3822.59  31
  -1   3 -12 56956.0 3343.38  32
   1  -3 -12 61329.5 3069.35  27
  -1  -3 -12 58449.0 3045.09  23
   1  -3 -12 53609.3 2961.86   1
  -1  -3 -11 2271.48 761.206  15
   1  -3 -11 2919.56 861.192  15
  -1  -3 -11 2252.94 394.551  16
   1  -3 -11 2844.91 697.228  31
  -1  -3 -11 2547.66 732.589  31
  -1   3 -11 2921.31 484.707  32
  -1  -3 -10 54963.5 2997.25  16
  -1  -3 -10 58082.7 3853.39  15
  -1  -3 -10 55379.2 2881.27  17
   1  -3 -10 58254.4 4096.01  15
   1  -3 -10 62188.3 3685.62  31
  -1   3 -10 54722.9 3188.88  32
  -1  -3 -10 46349.0 3599.35  31
   1  -3 -10 56909.8 3568.04  28
   1  -3 -10 55913.1 2918.37  26
  -1  -3  -9 57830.7 4027.84  31
  -1   3  -9 61885.8 3490.06  32
   1  -3  -9 63418.4 3235.29  26
   1  -3  -9 64839.4 3872.61  28
  -1   3  -9 60817.4 3182.96  37
  -1  -3  -9 64193.8 3204.76  17
  -1  -3  -9 61374.6 4171.50  15
  -1  -3  -9 65456.0 3355.38  16
   1  -3  -9 64251.0 4448.52  15
   1  -3  -9 59751.9 3186.92  17
  -1   3  -8 2644.98 420.038  32
  -1  -3  -8 2202.31 728.705  31
  -1  -3  -8 1883.22 859.344  15
  -1  -3  -8 1794.24 340.500  27
   1  -3  -8 2481.12 292.044  26
   1  -3  -8 2273.12 513.920  28
  -1   3  -8 2366.48 257.204  37
  -1  -3  -8 2780.40 271.684  17
   1  -3  -8 2712.65 266.367  17
   1  -3  -8 3799.87 1035.08  15
  -1  -3  -8 2943.90 476.441  16
  -1  -3  -7 147987. 7453.16  27
   1  -3  -7 146953. 7937.59  28
   1  -3  -7 149829. 7347.45  26
  -1   3  -7 147843. 7592.23  32
  -1  -3  -7 143753. 8163.85  31
  -1   3  -7 143378. 7297.44  37
   1  -3  -7 158189. 8940.34  15
  -1  -3  -7 162671. 8715.77  15
  -1  -3  -7 147207. 7316.85  17
   1  -3  -7 146512. 7307.18  17
  -1  -3  -7 151899. 7535.53  16
  -1   3  -6 49824.8 2631.58  37
  -1  -3  -6 47854.6 3313.62  31
  -1   3  -6 54499.5 2926.48  32
  -1  -3  -6 51261.5 2771.01  27
   1  -3  -6 48885.1 3173.30  28
   1  -3  -6 51810.6 2678.65  26
  -1  -3  -6 54697.9 2689.66  23
   1  -3  -6 50656.5 2641.71  17
  -1  -3  -6 49207.5 2645.57  17
  -1  -3  -6 55393.3 2908.53  16
  -1  -3  -6 57061.3 3939.93  15
   1  -3  -6 54690.9 4163.69  15
  -1   3  -5 8636.59 541.479  37
  -1   3  -5 8067.98 754.823  32
  -1  -3  -5 5551.47 904.267  31
  -1  -3  -5 7928.79 1402.68  15
  -1  -3  -5 8019.62 591.462  26
   1  -3  -5 8933.89 582.161  26
   1  -3  -5 8957.30 960.764  28
  -1  -3  -5 7922.08 949.848  28
  -1  -3  -5 8429.87 652.294  27
  -1  -3  -5 9070.50 582.658  23
   1  -3  -5 10152.5 1679.03  15
  -1  -3  -5 9090.51 841.096  16
   1  -3  -5 7954.94 538.387  17
  -1  -3  -5 8745.45 555.854  17
  -1   3  -4 46042.4 2461.83  37
  -1  -3  -4 47797.8 2526.11  26
   1  -3  -4 48676.7 2511.60  26
   1  -3  -4 50777.2 3047.00  28
  -1  -3  -4 48036.1 3054.66  28
  -1  -3  -4 49504.1 2596.21  27
  -1   3  -4 48271.0 2744.04  32
  -1  -3  -4 46278.3 3020.00  31
   1  -3  -4 48112.9 2483.53  23
  -1  -3  -4 52401.2 2519.00  23
  -1  -3  -4 51796.1 2813.70  16
  -1  -3  -4 46803.3 3787.39  15
  -1  -3  -4 46037.2 2480.77  17
   1  -3  -4 48056.4 4107.27  15
   1  -3  -4 47787.0 2478.84  17
  -1   3  -3 221299. 11208.0  37
   1  -3  -3 242153. 11855.9  28
  -1  -3  -3 230324. 11270.2  26
  -1  -3  -3 239748. 11871.7  28
   1  -3  -3 237016. 11263.3  26
  -1  -3  -3 217216. 11732.0  31
  -1   3  -3 236026. 11533.4  32
   1  -3  -3 215305. 11216.4  23
  -1  -3  -3 244481. 11257.9  23
   1  -3  -3 230030. 11227.9  17
  -1  -3  -3 247523. 11598.7  16
  -1  -3  -3 245754. 13043.4  15
   1  -3  -3 233781. 13282.8  15
  -1  -3  -3 218501. 11228.2  17
  -1  -3  -2 46360.6 2303.35  26
  -1  -3  -2 44240.5 2784.70  28
  -1  -3  -2 46303.5 2712.19  31
  -1  -3  -2 45496.4 2279.49  23
   1  -3  -2 39750.2 3930.58  15
   1  -3  -2 42064.5 2254.26  17
  -1  -3  -2 49017.6 3857.83  15
  -1  -3  -2 40230.2 2254.51  17
  -1  -3  -2 48009.2 2648.30  16
   1  -3  -1 15346.0 1418.99  39
  -1  -3  -1 16190.9 1287.99  28
  -1  -3  -1 14278.1 853.884  26
  -1  -3  -1 12364.2 1116.64  31
  -1  -3  -1 13822.2 829.504  23
   1  -3  -1 12882.1 2181.89  15
  -1  -3  -1 15084.9 1230.61  16
   1  -3  -1 14794.0 829.901  17
  -1  -3  -1 12152.9 1986.66  15
   1  -3   0 106145. 5814.87  39
  -1  -3   0 104706. 5277.36  23
   1  -3   0 106932. 7483.32  15
   1  -3   0 102348. 5273.20  17
  -1  -3   0 120227. 5755.49  16
  -1  -3   0 119175. 7334.11  15
  -1  -3   0 109720. 5828.00  28
  -1  -3   0 106410. 5300.97  26
  -1  -3   1 4759.17 358.593  23
   1  -3   1 2556.64 1539.02  15
   1  -3   1 5057.78 357.462  17
  -1  -3   1 5207.97 1528.31  15
  -1  -3   1 4997.47 669.807  28
  -1  -3   1 4590.31 356.176  25
  -1  -3   1 4679.77 370.566  26
  -1   3   2 48698.8 2470.46  36
  -1  -3   2 46541.1 2478.10  23
   1  -3   2 47160.0 2489.75  17
  -1  -3   2 49532.9 2971.17  28
  -1  -3   2 51696.9 2512.57  26
  -1  -3   2 48455.3 2489.09  25
  -1   3   3 225593. 11356.0  36
  -1  -3   3 224068. 11366.4  23
   1  -3   3 233728. 11389.0  17
  -1  -3   3 235678. 11378.4  25
   1  -3   3 236910. 12005.1  28
  -1  -3   3 250248. 11931.5  28
  -1  -3   3 237391. 11395.6  26
  -1   3   4 49119.6 2515.00  36
  -1  -3   4 47793.3 2521.58  23
   1  -3   4 49138.6 2543.66  18
  -1  -3   4 49997.3 2834.40  16
  -1  -3   4 47886.6 2526.44  18
   1  -3   4 49297.8 2545.31  17
  -1  -3   4 50296.7 2533.21  25
  -1  -3   4 52062.0 3028.66  28
  -1  -3   4 50776.3 2550.24  26
  -1   3   5 5670.74 406.854  36
  -1  -3   5 6244.51 423.035  23
   1  -3   5 5981.78 1404.11  15
   1  -3   5 5313.25 429.301  18
  -1  -3   5 7390.72 720.321  16
  -1  -3   5 7477.92 1430.71  15
  -1  -3   5 6076.11 432.220  18
  -1  -3   5 5544.47 713.879  28
  -1  -3   5 5842.71 420.589  25
  -1   3   6 41479.3 2206.38  36
  -1  -3   6 41778.8 2218.71  25
  -1  -3   6 46113.8 2739.29  28
  -1  -3   6 41705.3 2216.87  23
  -1  -3   6 42237.9 3369.58  15
  -1  -3   6 42879.0 2229.60  18
   1  -3   6 44166.5 2247.13  18
   1  -3   6 43609.0 3646.90  15
  -1  -3   6 47534.8 2493.51  16
  -1   3   7 138156. 6961.52  36
   1   3   7 127372. 7112.09  33
  -1  -3   7 142868. 6976.78  25
  -1  -3   7 157426. 7578.90  28
  -1  -3   7 132482. 6953.09  24
  -1  -3   7 140606. 6975.33  23
   1  -3   7 142979. 7001.53  18
  -1  -3   7 156145. 8312.26  15
  -1  -3   7 144856. 6990.08  18
   1  -3   7 152071. 8593.95  15
  -1  -3   7 155999. 7222.59  16
  -1   3   8 2330.88 250.429  36
   1   3   8 2264.41 380.638  33
  -1  -3   8 2829.98 849.117  15
  -1  -3   8 2501.71 254.529  25
  -1  -3   8 1747.93 441.336  28
  -1  -3   8 2325.90 254.376  24
  -1  -3   8 2010.25 250.122  23
   1  -3   8 2566.88 1024.23  15
  -1  -3   8 2180.99 261.688  18
   1  -3   8 2183.47 269.660  18
  -1  -3   8 2272.02 448.210  16
  -1   3   9 54338.1 2915.47  36
  -1  -3   9 63631.5 3514.68  28
  -1  -3   9 59829.6 2935.04  25
   1   3   9 53502.4 3098.01  33
  -1  -3   9 53482.2 2907.79  24
   1  -3   9 57619.3 2958.39  18
  -1  -3   9 59651.1 3095.77  16
  -1  -3   9 59254.9 2953.86  18
  -1  -3   9 62049.5 3976.52  15
   1  -3   9 52554.7 4075.32  15
  -1   3  10 54081.2 2802.01  36
   1   3  10 50026.1 2953.63  33
  -1  -3  10 56209.6 3347.54  28
  -1  -3  10 52853.1 2787.20  24
   1  -3  10 55324.8 2841.60  18
  -1  -3  10 57688.4 2950.21  16
  -1  -3  10 53297.6 2820.05  18
  -1  -3  10 56347.7 3742.76  15
   1  -3  10 61474.1 4113.70  15
   1  -3  11 1072.22 203.545  35
  -1   3  11 1131.23 204.942  36
   1   3  11 1094.91 289.667  33
  -1  -3  11 1715.42 639.547  15
  -1  -3  11 1127.00 384.922  28
  -1  -3  11 1519.96 221.003  24
   1  -3  11 1841.40 813.403  15
  -1  -3  11 969.913 218.644  18
   1  -3  11 1219.19 248.794  18
  -1  -3  11 996.831 306.932  16
   1  -3  12 51496.0 2746.85  35
  -1   3  12 55091.2 2914.03  33
   1   3  12 50095.3 2894.08  33
   1  -3  12 53882.3 2781.14   4
  -1  -3  12 52024.1 3303.17  28
  -1  -3  12 51605.4 2746.17  24
  -1  -3  12 52699.5 2838.88  16
   1  -3  12 56512.5 3900.67  15
  -1  -3  12 54066.7 2791.75  18
   1  -3  12 53116.6 2806.28  18
  -1  -3  12 56618.0 3624.72  15
  -1  -3  13 136431. 6410.05  10
   1  -3  13 121363. 6368.74  35
  -1   3  13 126396. 6548.45  33
   1   3  13 120993. 6518.28  33
   1  -3  13 123697. 6401.48   4
  -1  -3  13 126319. 6981.51  28
  -1  -3  13 126416. 6375.19  24
   1  -3  13 126996. 6433.34  18
  -1  -3  13 132264. 7238.55  15
   1  -3  13 118319. 7417.26  15
  -1  -3  13 133147. 6424.24  18
  -1  -3  13 130826. 6450.56  16
  -1  -3  14 22860.4 1399.60   9
  -1  -3  14 24211.8 1367.59  10
   1  -3  14 22693.1 1329.40  35
  -1   3  14 24946.7 1523.94  33
   1  -3  14 23238.4 1372.75   4
  -1  -3  14 23678.7 1343.86  24
  -1  -3  14 25014.0 1389.18  18
   1  -3  14 21920.0 2171.97  15
   1  -3  14 25673.4 1415.35  18
  -1  -3  14 21855.7 1964.35  15
   1  -3  14 17488.7 1405.99  16
  -1  -3  15 27847.9 1556.79  10
  -1   3  15 28377.0 1726.96  33
   1  -3  15 25876.0 1506.09  35
  -1  -3  15 28731.8 1548.94  14
  -1  -3  15 26646.8 1600.34  13
  -1  -3  15 26574.7 1514.81  24
  -1  -3  15 28713.9 1574.50  18
   1  -3  15 29776.4 1607.79  18
  -1  -3  15 22784.1 2045.84  15
   1  -3  15 19934.3 1552.94  16
   1  -3  15 24089.2 2266.89  15
  -1  -3  16 31839.5 1892.47  10
   1  -3  16 32059.1 1847.24  35
  -1   3  16 31531.8 2357.32  38
  -1   3  16 36061.5 2104.25  33
  -1  -3  16 35191.1 1935.02  13
  -1  -3  16 34774.3 1891.79  14
   1  -3  16 33185.3 1910.49  24
  -1  -3  16 32989.0 1863.31  24
   1  -3  16 34556.6 1942.61  18
  -1  -3  16 34194.5 1914.65  18
  -1  -3  16 30361.4 2381.23  15
   1  -3  16 29566.4 2525.54  15
  -1  -3  17 16960.2 1195.84  10
   1  -3  17 17961.8 1159.31  35
  -1   3  17 21622.8 1447.89  33
  -1  -3  17 18842.7 1210.69  13
  -1  -3  17 19858.9 1207.41  14
   1  -3  17 18623.6 1863.15  29
   1  -3  17 18814.6 1232.08  24
  -1  -3  17 20471.2 1199.89  24
  -1  -3  17 20175.9 1242.44  18
   1  -3  17 16313.9 1655.70  15
   1  -3  17 19677.5 1263.48  18
  -1  -3  18 15337.4 1070.32  10
   1  -3  18 14640.2 998.648  35
  -1   3  18 16338.1 1222.27  33
   1   3  18 17310.8 1682.83  30
  -1  -3  18 14326.1 1016.19  14
  -1  -3  18 16448.2 1046.82  13
   1  -3  18 13797.8 1668.01  29
  -1  -3  18 14936.4 1018.89  24
   1  -3  18 14744.6 1065.70  24
   1  -3  18 16802.1 1119.39  18
  -1  -3  18 17339.3 1104.31  18
  -1  -3  19 96677.7 5097.75  10
   1  -3  19 97337.3 5027.58  35
  -1   3  19 101533. 5264.33  33
   1   3  19 93799.6 5764.24  30
  -1  -3  19 102975. 5051.61  13
  -1  -3  19 91204.5 5052.67  14
   1  -3  19 104572. 6165.67  29
   1  -3  19 97777.1 5114.60  24
  -1  -3  19 94659.6 5042.01  24
   1  -3  19 100152. 5160.36  18
  -1  -3  19 100762. 5125.36  18
  -1  -3  20 25230.3 1625.23  10
   1   3  20 26987.4 1656.11  34
   1  -3  20 25715.9 1549.92  35
   1   3  20 24245.7 2142.98  30
  -1   3  20 28060.8 1759.10  33
  -1  -3  20 25664.8 1596.96  14
  -1  -3  20 27182.4 1569.17  13
   1  -3  20 24895.1 2424.91  29
   1  -3  20 27588.4 1661.07  24
  -1  -3  20 25429.2 1587.67  24
   1  -3  20 28203.7 1704.06  18
  -1  -3  20 27106.6 1666.26  18
  -1  -3  21 3038.93 437.473  10
   1  -3  21 3001.46 383.020  35
  -1   3  21 3328.17 512.432  33
   1   3  21 2558.30 433.587  34
  -1  -3  21 3104.37 387.940  13
  -1  -3  21 2673.65 359.258  12
  -1  -3  21 3418.24 418.329  14
   1  -3  21 3453.34 883.891  29
   1   3  21 3338.87 721.001  30
  -1  -3  21 3775.43 458.194  24
   1  -3  21 3709.16 502.163  24
   1  -3  21 3026.78 494.688  18
  -1  -3  21 3648.54 488.449  18
  -1  -3  22 45794.4 2575.06  10
   1  -3  22 44893.0 2477.07  35
  -1   3  22 48222.7 2637.28  34
   1   3  22 45446.8 2581.91  34
  -1   3  22 45521.3 3495.37  30
   1   3  22 39486.3 3063.03  30
  -1  -3  22 44941.3 2470.92  12
  -1  -3  22 50194.9 2517.10  13
   1  -3  22 45195.5 2509.10  13
  -1  -3  22 45292.1 2551.36  14
   1  -3  22 43204.1 3435.52  29
   1  -3  22 47026.1 2599.80  24
  -1  -3  22 44812.5 2537.05  24
  -1  -3  22 46165.8 2589.31  18
   1  -3  22 46739.7 2624.14  18
  -1  -3  23 44284.0 2573.96  10
   1  -3  23 45040.7 2487.42  35
  -1   3  23 48511.5 2639.47  34
  -1   3  23 43443.4 3447.01  30
   1   3  23 47697.0 2600.69  34
   1   3  23 42710.5 3122.75  30
   1  -3  23 44417.3 2503.03  13
  -1  -3  23 49740.3 2518.39  13
  -1  -3  23 44461.9 2478.20  12
   1  -3  23 43913.5 3439.15  29
  -1  -3  23 45300.0 2549.64  24
   1  -3  23 48161.2 2614.25  24
   1  -3  23 48713.0 2640.47  18
  -1  -3  23 48455.1 2618.50  18
   1  -3  24 1440.73 282.482  10
  -1  -3  24 884.284 298.709  10
   1  -3  24 1236.35 240.878  35
   1   3  24 915.694 286.116  34
  -1   3  24 987.543 330.869  34
   1  -3  24 1280.42 253.713  13
  -1  -3  24 1196.35 242.153  12
  -1  -3  24 911.863 231.254  13
  -1   3  24 1590.42 561.245  30
   1  -3  24 2093.99 676.274  29
  -1  -3  24 1051.55 281.122  24
   1  -3  24 1177.67 328.185  24
  -1  -3  24 1639.72 324.188  18
   1  -3  24 1241.18 343.451  18
  -1  -3  25 31657.8 1788.64  10
   1  -3  25 30568.9 1740.98  10
   1  -3  25 28370.3 1671.15  35
  -1   3  25 26563.4 2449.57  30
   1   3  25 29973.3 1780.00  34
  -1   3  25 31671.1 1815.26  34
  -1  -3  25 27088.3 1667.58  12
  -1  -3  25 33398.5 1712.72  13
   1  -3  25 29599.7 1684.62  13
  -1  -3  25 30778.2 1754.84  24
   1  -3  25 31295.8 1797.18  24
   1  -3  25 33019.2 1829.43  18
   1  -3  26 10335.4 733.155  10
  -1  -3  26 9949.52 741.557  10
   1  -3  26 8452.32 645.160  35
  -1   3  26 10552.9 779.181  34
   1   3  26 10375.9 766.763  34
   1  -3  26 8815.41 655.870  13
  -1  -3  26 9708.21 670.995  13
  -1   3  26 9035.78 1230.85  30
  -1  -3  26 11217.9 752.897  24
   1  -3  26 11004.8 786.377  24
   1  -3  26 9960.98 775.441  18
  -1  -3  27 4393.44 446.180  10
   1  -3  27 4228.49 420.139  10
   1  -3  27 4075.21 362.727  35
   1   3  27 3726.91 431.945  34
  -1   3  27 4146.44 457.919  34
  -1  -3  27 3557.74 362.022  13
  -1   3  27 3858.14 779.924  30
  -1  -3  27 3923.28 413.961  24
   1  -3  27 4693.09 469.676  24
   1  -3  27 4739.70 484.596  18
   1  -3  28 15386.8 982.114  18
  -1  -3  28 14031.8 866.925  13
  -1  -3  28 13895.1 940.701  10
  -1   3  28 15243.9 976.177  34
   1   3  28 14265.4 957.457  34
   1  -3  28 14671.6 965.305  24
  -1  -3  28 13872.0 921.751  24
   1  -3  28 15749.7 944.847  10
   1  -3  29 58116.9 3123.33  18
  -1  -3  29 60952.8 3017.01  13
  -1  -3  29 60495.2 3106.84  10
  -1   3  29 59922.4 3118.21  34
   1   3  29 59677.9 3120.32  34
   1  -3  29 56826.5 3107.58  24
  -1  -3  29 56507.7 3074.77  24
   1  -3  29 59972.5 3091.81  10
   1  -3  30 9666.77 703.618  18
  -1  -3  30 10818.6 705.873  10
  -1   3  30 10450.6 709.741  34
   1   3  30 9067.30 691.560  34
  -1  -3  30 9248.70 663.702  24
   1  -3  30 10919.0 720.325  24
   1  -3  30 10958.3 692.439  10
   1  -3  31 11766.4 747.893  18
  -1  -3  31 11520.5 726.137  10
   1   3  31 11606.7 741.041  34
  -1   3  31 11770.3 735.514  34
  -1  -3  31 9318.13 685.862  24
   1  -3  31 11139.7 739.326  24
   1  -3  31 11376.9 714.545  10
   1  -3  32 20635.6 1166.13  18
  -1  -3  32 21288.6 1153.75  10
  -1   3  32 20424.7 1151.85  34
   1   3  32 20912.0 1167.19  34
  -1  -3  32 17955.1 1112.29  24
   1  -3  32 20120.0 1157.94  24
   1  -3  32 20958.7 1138.60  10
   1  -3  33 8734.68 548.946  10
  -1  -3  33 8541.24 561.491  10
   1  -3  33 8484.98 573.643  18
   1  -3  33 8544.30 570.246  24
  -1   3  33 8510.23 561.738  34
  -1  -3  34 3444.59 285.014  10
   1  -3  34 3066.50 277.783  18
   1  -3  34 3026.15 279.888  24
  -1   3  34 3148.37 269.235  34
   1  -3  35 17322.6 1030.56  24
  -1  -3  35 21458.3 1040.71  10
   1  -3  35 18640.9 1038.89  18
  -1  -3  35 19370.2 1043.86  18
  -1  -3  36 4719.47 308.278  10
  -1  -3  37 3427.06 219.519  10
   1  -4 -34 8218.26 454.150   1
   1  -4 -33 5429.27 344.371   1
   1  -4 -32 56933.0 2772.10   1
   1  -4 -32 52743.9 2783.42  23
   1  -4 -31 14898.9 825.933   1
  -1  -4 -31 13403.3 822.363  23
   1  -4 -31 14958.0 849.068  23
   1  -4 -30 5792.56 415.532   1
   1  -4 -30 5731.19 436.565  23
  -1  -4 -30 5181.11 413.086  23
  -1  -4 -29 37884.8 1989.70   1
   1  -4 -29 38968.7 2019.50   1
   1  -4 -29 38733.3 2042.53  23
  -1  -4 -29 36417.1 2016.52  23
  -1  -4 -28 38165.2 2001.30   1
   1  -4 -28 38279.0 2030.13   1
   1  -4 -28 37713.5 2052.55  23
  -1  -4 -28 36779.3 2032.29  23
   1  -4 -27 1486.41 251.063   1
  -1  -4 -27 1600.10 237.696   1
  -1  -4 -27 1289.63 240.085  23
   1  -4 -27 1611.36 277.786  23
  -1   4 -26 19861.0 1250.34  37
  -1  -4 -26 22164.3 1278.77   1
   1  -4 -26 23129.4 1323.56   1
  -1  -4 -26 24927.2 1349.76  23
  -1   4 -25 13984.6 916.319  37
   1  -4 -25 14250.6 954.753   1
  -1  -4 -25 14353.3 919.803   1
  -1  -4 -25 15356.3 980.017  23
  -1   4 -24 609.087 182.576  37
   1  -4 -24 285.499 226.493   1
  -1  -4 -24 494.188 214.595   1
  -1  -4 -24 709.463 254.214  23
  -1   4 -23 40292.5 2250.65  37
   1  -4 -23 41340.4 2304.54   1
  -1  -4 -23 37731.1 2219.63   1
  -1  -4 -23 44749.4 2330.62  23
  -1   4 -22 93028.9 4848.24  37
   1  -4 -22 90626.3 4885.71   1
  -1  -4 -22 88741.9 4811.91   1
  -1  -4 -22 104818. 4945.68  23
  -1   4 -21 14921.3 1067.22  37
  -1  -4 -21 17770.2 1158.85  23
  -1  -4 -21 14570.3 1036.76   1
   1  -4 -21 16417.3 1127.07   1
  -1   4 -20 48400.9 2644.84  37
   1  -4 -20 45947.8 2758.58  27
   1  -4 -20 42521.6 3570.51  31
  -1  -4 -20 50181.1 2725.89  23
   1  -4 -20 49782.4 2715.91  23
   1  -4 -20 48394.3 2715.53   1
  -1  -4 -20 43918.3 2593.25   1
  -1   4 -19 37484.5 2198.55  37
   1  -4 -19 40793.2 2401.23  27
   1  -4 -19 32778.3 3117.06  31
   1  -4 -19 39781.9 2300.70  23
  -1  -4 -19 42482.8 2345.36  23
  -1  -4 -19 36558.6 2176.88   1
   1  -4 -19 39475.8 2270.07   1
  -1   4 -18 23934.7 1455.16  37
   1  -4 -18 24261.1 1625.77  27
   1  -4 -18 19382.4 2281.14  31
  -1  -4 -18 26174.8 1612.00  23
   1  -4 -18 25528.6 1582.82  23
  -1  -4 -18 21964.0 1414.29   1
   1  -4 -18 22094.3 1479.17   1
  -1   4 -17 4668.65 487.731  37
   1  -4 -17 5311.32 662.356  27
   1  -4 -17 4865.86 1104.66  31
  -1  -4 -17 5092.65 621.813  23
   1  -4 -17 5129.12 612.915  23
  -1  -4 -17 4682.25 482.601   1
   1  -4 -17 4607.21 533.025   1
  -1   4 -16 48297.4 2711.88  37
  -1  -4 -16 50543.0 2934.70  27
   1  -4 -16 54177.8 2945.83  27
   1  -4 -16 44141.2 3949.66  31
   1  -4 -16 56978.6 2895.43  23
  -1  -4 -16 47251.4 2682.35   1
   1  -4 -16 49286.3 2753.22   1
  -1   4 -15 12589.6 871.711  37
   1  -4 -15 9517.98 1694.58  31
   1  -4 -15 13492.5 1052.81  27
   1  -4 -15 12961.9 981.519  23
   1  -4 -15 13270.8 910.499   1
  -1  -4 -15 11760.8 831.859   1
  -1  -4 -14 12551.7 969.431   9
  -1  -4 -14 15253.7 935.117   1
   1  -4 -14 14361.4 980.009   1
  -1   4 -14 14931.3 962.540  37
   1  -4 -14 11841.6 1805.17  31
   1  -4 -14 9885.86 1588.62  15
   1  -4 -14 17161.7 1166.41  27
   1  -4 -14 17511.7 1115.48  23
   1  -4 -14 13046.3 1064.98  16
  -1  -4 -14 18745.3 1866.52  15
  -1  -4 -13 70546.8 4265.42   9
  -1   4 -13 86148.7 4262.23  37
   1  -4 -13 84851.1 5608.85  31
  -1  -4 -13 79835.1 4209.10   1
   1  -4 -13 82207.8 4272.25   1
   1  -4 -13 93171.7 4491.24  27
   1  -4 -13 96874.4 4422.06  23
   1  -4 -13 82107.3 5616.34  15
   1  -4 -13 79620.2 4409.97  16
  -1  -4 -13 79152.1 5328.35  15
  -1  -4 -12 117025. 6601.86   9
   1  -4 -12 131835. 6592.44   1
  -1  -4 -12 126113. 6525.69   1
  -1   4 -12 129864. 6570.88  37
   1  -4 -12 131735. 7880.97  31
   1  -4 -12 145186. 6808.59  27
   1  -4 -12 144682. 6703.12  23
  -1  -4 -12 133405. 7796.55  15
   1  -4 -12 128284. 8027.23  15
   1  -4 -12 133405. 6796.83  16
  -1  -4 -11 12693.5 893.671   9
   1  -4 -11 12522.7 856.338   1
  -1   4 -11 12656.8 843.229  37
  -1  -4 -11 9590.97 1321.45  31
   1  -4 -11 14084.8 1764.77  31
  -1  -4 -11 13208.7 1694.47  15
  -1  -4 -11 13136.5 1059.82  27
   1  -4 -11 13496.4 1001.09  27
  -1  -4 -11 14597.8 955.978  23
   1  -4 -11 15031.6 946.406  23
   1  -4 -11 12766.5 1103.74  16
  -1  -4 -11 13322.9 1018.32  16
   1  -4 -11 13599.3 1905.82  15
  -1  -4 -10 103380. 5096.05   9
  -1  -4 -10 91291.4 5115.18   6
  -1   4 -10 96121.6 5017.31  37
  -1  -4 -10 86490.6 5783.80  31
   1  -4 -10 102975. 6151.23  31
   1  -4 -10 93899.6 5022.19   1
  -1  -4 -10 97278.8 5272.94  27
   1  -4 -10 107527. 5223.54  27
   1  -4 -10 104429. 5109.78  23
  -1  -4 -10 104289. 5137.79  23
   1  -4 -10 104192. 5342.69  16
  -1  -4 -10 96189.8 6287.76  15
   1  -4 -10 93539.5 6600.71  15
  -1  -4 -10 99870.1 5217.41  16
  -1  -4 -10 100885. 5071.49  17
  -1  -4  -9 41022.1 2589.92   6
  -1  -4  -9 48920.3 2548.24   9
   1  -4  -9 45705.4 2479.27   1
  -1   4  -9 46886.9 2477.05  37
  -1  -4  -9 35749.1 3112.93  31
   1  -4  -9 50347.3 3470.71  31
  -1  -4  -9 43409.8 2689.67  27
   1  -4  -9 49050.0 2589.58  26
   1  -4  -9 44674.7 3330.87  28
   1  -4  -9 51243.6 2562.33  23
  -1  -4  -9 48241.1 2570.25  23
  -1  -4  -9 51010.0 2715.63  16
   1  -4  -9 53647.5 4230.50  15
   1  -4  -9 47127.6 2516.09  17
  -1  -4  -9 39758.8 3561.02  15
  -1  -4  -9 46190.8 2515.76  17
   1  -4  -9 51313.7 2846.40  16
  -1  -4  -8 15980.8 981.518   9
  -1  -4  -8 13451.4 1064.82   6
   1  -4  -8 13545.3 905.050   1
  -1   4  -8 13839.9 906.038  37
  -1  -4  -8 13673.3 1551.08  31
   1  -4  -8 15810.3 1651.27  31
  -1  -4  -8 15321.0 1954.77  15
  -1  -4  -8 15737.7 1142.89  27
   1  -4  -8 13793.1 1557.04  28
   1  -4  -8 15495.4 1006.23  26
  -1  -4  -8 16409.9 1001.02  23
   1  -4  -8 16056.0 983.448  23
  -1  -4  -8 15705.7 1157.36  16
  -1  -4  -8 15861.1 959.516  17
   1  -4  -8 12166.7 2041.95  15
   1  -4  -8 16232.4 960.084  17
  -1  -4  -7 55547.5 4363.01  15
  -1  -4  -7 60662.1 3278.25  16
   1  -4  -7 57525.0 3031.34  17
  -1  -4  -7 55893.7 3030.46  17
   1  -4  -7 57226.6 4774.08  15
  -1  -4  -7 49400.5 3737.03  31
   1  -4  -7 64152.6 3914.47  31
   1  -4  -7 54829.5 2986.66   1
  -1  -4  -7 59884.9 3234.03  27
   1  -4  -7 58236.0 3869.51  28
   1  -4  -7 61157.5 3106.50  26
   1  -4  -7 58912.6 3047.07  23
  -1  -4  -7 60931.2 3077.26  23
  -1  -4  -7 61776.1 3072.01   9
  -1  -4  -7 50885.7 3203.26   6
   1  -4  -6 117488. 7637.15  15
  -1  -4  -6 109150. 5510.21  17
  -1  -4  -6 110746. 5774.61  16
  -1  -4  -6 116319. 7185.16  15
   1  -4  -6 112823. 5515.73  17
  -1  -4  -6 94559.8 6234.90  31
   1  -4  -6 102470. 5453.99   1
  -1  -4  -6 103659. 5670.60  27
   1  -4  -6 117603. 6467.33  28
   1  -4  -6 113074. 5574.02  26
   1  -4  -6 107082. 5501.61  23
  -1  -4  -6 118653. 5558.02  23
  -1  -4  -6 97155.9 5691.93   6
  -1  -4  -6 114612. 5538.52   9
  -1  -4  -5 19977.5 1440.98  16
  -1  -4  -5 22497.4 1186.16  17
   1  -4  -5 20964.4 1167.97  17
  -1  -4  -5 19913.0 2438.99  15
   1  -4  -5 19974.8 2662.19  15
  -1  -4  -5 16599.2 1757.67  31
   1  -4  -5 17913.6 1108.32   1
  -1  -4  -5 19426.1 1315.43  27
   1  -4  -5 20181.3 1158.08  23
  -1  -4  -5 20394.4 1185.23  23
  -1  -4  -5 20547.2 1183.49   9
  -1  -4  -5 15069.7 1280.06   6
  -1  -4  -4 60606.7 4624.09  15
  -1  -4  -4 59900.8 2974.89  17
   1  -4  -4 56988.2 2958.19  17
  -1  -4  -4 59255.0 3289.86  16
   1  -4  -4 59764.7 5021.12  15
  -1  -4  -4 52050.3 3732.42  31
  -1  -4  -4 55798.8 3771.71  28
  -1  -4  -4 57098.5 3122.69  27
  -1  -4  -4 60287.6 2991.18   9
  -1  -4  -4 52167.4 3127.01   6
  -1  -4  -4 60741.7 2987.62  23
   1  -4  -4 56097.5 2940.34  23
   1  -4  -4 51288.7 2897.36   1
   1  -4  -3 66095.2 3680.92   1
  -1  -4  -3 80099.1 4130.10  16
  -1  -4  -3 71312.0 5427.49  15
  -1  -4  -3 74435.0 3754.36  17
   1  -4  -3 76576.6 6004.18  15
   1  -4  -3 77433.4 3757.43  17
  -1  -4  -3 76043.2 3914.87  27
  -1  -4  -3 77987.8 4638.56  28
  -1  -4  -3 72658.6 3804.18  26
  -1  -4  -3 76314.0 3767.06  23
   1  -4  -3 71609.0 3717.97  23
  -1  -4  -3 70469.0 3927.50   6
  -1  -4  -3 72289.8 3763.21   9
  -1  -4  -2 62346.8 3540.31   6
  -1  -4  -2 69758.2 3404.31   9
   1  -4  -2 58401.7 3302.29   1
  -1  -4  -2 66459.0 3432.40  26
  -1  -4  -2 66976.8 3529.24  27
  -1  -4  -2 68464.5 4214.49  28
  -1   4  -2 63049.2 3323.75  36
  -1  -4  -2 68088.4 3383.09  23
   1  -4  -2 63308.9 3331.64  23
  -1  -4  -2 68571.3 3388.85  17
   1  -4  -2 68763.5 3382.30  17
  -1  -4  -2 71548.7 3776.08  16
   1  -4  -2 63372.3 5546.18  15
  -1  -4  -2 65104.6 5082.75  15
  -1  -4  -1 22112.3 1403.53   6
  -1  -4  -1 20770.9 1249.56   9
  -1  -4  -1 21391.2 1286.55  26
  -1  -4  -1 20666.7 1866.73  28
  -1  -4  -1 21008.4 1371.83  27
  -1   4  -1 21218.5 1201.21  36
  -1  -4  -1 22704.7 1252.33  23
   1  -4  -1 20400.6 1195.41  23
   1  -4  -1 19038.1 2904.29  15
   1  -4  -1 21942.7 1244.04  17
  -1  -4  -1 21377.4 2652.44  15
  -1  -4  -1 22217.9 1253.39  17
  -1  -4  -1 22137.0 1621.18  16
  -1  -4   0 115505. 6418.34   6
  -1  -4   0 126608. 6293.89   9
   1  -4   0 123335. 6330.88   9
  -1  -4   0 128783. 6323.75  26
   1  -4   0 131393. 7179.73  28
  -1  -4   0 124732. 7081.50  28
   1  -4   0 131386. 6336.34  26
  -1  -4   0 123732. 6415.07  27
  -1   4   0 123526. 6228.03  36
   1  -4   0 115096. 6206.21  23
  -1  -4   0 129011. 6272.05  23
  -1  -4   0 119428. 8212.76  15
   1  -4   0 129250. 6282.58  17
  -1  -4   0 133204. 6711.96  16
   1  -4   0 116599. 8707.65  15
  -1  -4   0 130096. 6291.88  17
   1  -4   1 20215.0 1289.21   9
  -1  -4   1 21415.0 1255.78   9
  -1  -4   1 19709.8 1359.25   6
  -1   4   1 21578.1 1197.66  36
   1  -4   1 24193.9 1970.10  28
   1  -4   1 22719.1 1296.32  26
  -1  -4   1 24074.9 1925.69  28
  -1  -4   1 21879.9 1377.76  27
  -1  -4   1 20914.8 1269.63  26
   1  -4   1 19868.1 1173.05  23
  -1  -4   1 21438.3 1229.44  23
   1  -4   1 21070.6 3090.60  15
  -1  -4   1 21925.0 1251.62  17
   1  -4   1 22649.2 1249.44  17
  -1  -4   1 22763.7 2757.41  15
  -1  -4   2 65750.8 3481.46   9
   1  -4   2 63388.0 3518.05   9
  -1  -4   2 63847.3 3599.04   6
   1  -4   2 66263.2 3449.49   4
  -1  -4   2 64362.1 3450.10   4
  -1   4   2 66377.1 3418.95  36
   1  -4   2 70174.9 3505.80  25
   1  -4   2 68694.3 4286.88  28
   1  -4   2 66036.4 3511.08  26
  -1  -4   2 70660.4 4250.36  28
  -1  -4   2 69671.0 3507.98  26
  -1  -4   2 66677.3 3446.19  23
  -1  -4   2 71684.3 3493.21  17
   1  -4   2 69540.9 3476.56  17
  -1  -4   3 82070.8 4251.37   9
   1  -4   3 81014.7 4301.65   9
  -1  -4   3 77389.7 4358.38   6
   1  -4   3 84556.0 4219.48   4
  -1  -4   3 81465.8 4219.34   4
  -1   4   3 79389.6 4179.69  36
   1  -4   3 90182.5 5145.27  28
  -1  -4   3 83198.0 4990.88  28
   1  -4   3 85175.4 4268.90  25
  -1  -4   3 86417.3 4272.82  26
  -1  -4   3 80633.4 4205.64  23
  -1  -4   3 85168.9 4255.41  17
   1  -4   3 86286.1 4244.61  17
  -1  -4   4 67816.3 3520.20   9
   1  -4   4 61137.2 3548.75   9
  -1  -4   4 71135.3 3652.15   6
  -1   4   4 62252.0 3438.14  36
  -1  -4   4 67050.3 3486.33   4
   1  -4   4 67312.6 3481.72   4
  -1  -4   4 71339.3 3535.57  26
   1  -4   4 65965.0 4289.51  28
   1  -4   4 70617.3 3536.31  25
  -1  -4   4 71693.6 4288.43  28
  -1  -4   4 67645.0 3470.91  23
  -1  -4   4 58906.6 4908.20  15
   1  -4   4 68916.0 3508.41  17
  -1  -4   4 72823.8 3534.58  17
  -1  -4   5 16063.8 1096.54   6
  -1  -4   5 15849.2 996.954   9
   1  -4   5 13823.9 1029.20   9
  -1   4   5 14377.6 926.418  36
  -1  -4   5 15428.4 2123.18  15
   1  -4   5 15535.9 956.674   4
  -1  -4   5 16117.4 966.466   4
  -1  -4   5 16283.2 976.393  25
   1  -4   5 16609.3 1009.74  25
   1  -4   5 15353.1 1600.79  28
  -1  -4   5 14328.5 976.740  26
  -1  -4   5 15413.7 1530.66  28
  -1  -4   5 16154.0 952.903  23
   1  -4   5 16279.9 2510.76  15
  -1  -4   5 16149.7 996.736  17
  -1  -4   5 17009.9 1246.81  16
   1  -4   5 16954.8 992.990  17
   1  -4   6 85079.4 4851.58   9
  -1  -4   6 92879.2 4925.47   6
  -1  -4   6 94339.1 4809.94   9
  -1   4   6 87940.1 4730.46  36
  -1  -4   6 89607.8 4704.80  10
  -1  -4   6 96398.6 4779.48   4
   1  -4   6 94343.3 4767.42   4
  -1  -4   6 99612.0 4817.44  26
  -1  -4   6 96120.3 4778.31  25
   1  -4   6 99304.4 4828.15  25
   1  -4   6 99235.3 5706.91  28
  -1  -4   6 97824.5 5598.74  28
  -1  -4   6 90610.6 4745.71  23
   1  -4   6 97018.4 4803.37  17
  -1  -4   6 99328.0 4826.53  17
  -1  -4   6 88843.6 6206.66  15
  -1  -4   6 97400.8 5031.46  16
   1  -4   6 92271.0 6726.29  15
  -1  -4   7 52199.0 2626.53   9
   1  -4   7 41519.5 2636.13   9
  -1   4   7 45858.0 2535.20  36
  -1  -4   7 47028.5 2508.57  10
  -1  -4   7 49372.2 2575.15   4
   1  -4   7 47972.8 2562.98   4
  -1  -4   7 44472.5 3239.77  28
  -1  -4   7 51615.6 2611.43  26
   1  -4   7 50059.4 2617.78  25
  -1  -4   7 49478.4 2572.26  25
   1  -4   7 52443.3 3466.76  28
  -1  -4   7 45696.4 2537.43  23
  -1  -4   7 50787.2 2623.16  17
  -1  -4   7 47494.0 3835.45  15
  -1  -4   7 49472.5 2791.39  16
   1  -4   7 45214.1 4185.06  15
   1  -4   7 51253.0 2610.89  17
  -1  -4   8 19294.3 1128.56   4
   1  -4   8 19659.5 1128.61   4
  -1  -4   8 17881.7 1067.99  10
  -1   4   8 16323.9 1080.01  36
   1  -4   8 16004.3 1732.86  28
   1  -4   8 20590.3 1181.21  25
  -1  -4   8 19187.3 1765.15  28
  -1  -4   8 17208.3 1103.11  25
  -1  -4   8 18717.6 1144.37  26
  -1  -4   8 17668.3 1149.99   9
  -1  -4   8 17625.9 2113.03  15
  -1  -4   8 19634.5 1322.59  16
   1  -4   8 16585.1 2391.35  15
  -1  -4   8 20044.3 1177.26  17
   1  -4   8 19419.2 1154.66  17
  -1  -4   9 49038.4 2669.89   4
   1  -4   9 50645.3 2670.24   4
  -1   4   9 46951.3 2646.12  36
  -1  -4   9 49924.9 2619.76  10
  -1  -4   9 49718.3 2664.47  25
   1  -4   9 52242.2 2724.25  25
   1  -4   9 48607.9 3516.42  28
  -1  -4   9 47902.3 3388.37  28
  -1  -4   9 51021.2 2694.02  26
   1  -4   9 48166.1 4126.81  15
  -1  -4   9 50552.8 2683.32  18
   1  -4   9 52000.4 2716.29  17
  -1  -4   9 53183.2 2736.75  17
  -1  -4   9 45598.7 3778.36  15
  -1  -4   9 49566.5 2829.63  16
   1  -4   9 55941.7 2992.65  16
  -1  -4   9 47708.3 2714.26   9
   1  -4  10 105410. 5612.53  16
  -1  -4  10 106044. 5375.12  18
   1  -4  10 114180. 7112.98  15
   1  -4  10 108142. 5400.42  18
  -1  -4  10 107701. 5520.61  16
  -1  -4  10 110423. 5429.43  17
  -1  -4  10 97229.2 6489.63  15
   1  -4  10 112062. 5424.87  17
  -1   4  10 102789. 5515.77  33
  -1  -4  10 104394. 5309.00  10
  -1  -4  10 96704.6 6096.25  28
   1  -4  10 106034. 5410.53  25
  -1  -4  10 102786. 5347.13  25
   1  -4  10 105247. 6340.51  28
  -1  -4  10 105463. 5372.18  26
  -1  -4  10 103615. 5365.43   4
   1  -4  10 104391. 5362.05   4
  -1  -4  10 101397. 5418.62   9
  -1  -4  11 16855.5 1160.10  16
   1  -4  11 17334.9 1075.97  18
  -1  -4  11 15577.2 1063.18  17
   1  -4  11 16463.3 1255.17  16
   1  -4  11 18184.0 1094.88  17
  -1  -4  11 15876.3 1042.23  18
   1  -4  11 16932.9 2240.09  15
  -1   4  11 17652.4 1199.41  33
  -1  -4  11 14171.4 1823.06  15
  -1  -4  11 15440.6 985.566  10
  -1  -4  11 12706.1 1472.16  28
   1  -4  11 17434.0 1083.67  25
   1  -4  11 15520.1 1717.18  28
  -1  -4  11 15309.5 1028.50  26
  -1  -4  11 16381.9 1025.77  25
   1  -4  11 15135.1 1015.76   4
  -1  -4  11 16026.9 1033.18   4
  -1  -4  11 16806.0 1093.86   9
  -1  -4  12 129778. 6499.11  17
   1  -4  12 134384. 7956.13  15
  -1  -4  12 133709. 6542.43  16
  -1  -4  12 128299. 7561.13  15
   1  -4  12 111829. 6555.22  16
  -1  -4  12 131632. 6449.22  18
   1  -4  12 136203. 6480.86  18
  -1   4  12 128548. 6632.35  33
  -1  -4  12 128233. 6379.21  10
   1  -4  12 131907. 6483.76  25
   1  -4  12 120214. 7411.80  28
  -1  -4  12 121911. 7200.27  28
  -1  -4  12 118939. 6402.63  26
  -1  -4  12 128309. 6414.00  25
  -1  -4  12 126087. 6434.32   4
   1  -4  12 122609. 6419.46   4
  -1  -4  12 124005. 6487.10   9
  -1  -4  13 79405.0 4173.08  18
  -1  -4  13 73481.2 5117.55  15
   1  -4  13 71880.1 4253.24  16
   1  -4  13 83753.9 5530.81  15
   1  -4  13 87390.7 4224.37  18
  -1   4  13 84450.0 4397.35  33
  -1  -4  13 77422.6 4237.46  13
  -1  -4  13 79287.8 4112.28  10
  -1  -4  13 80608.6 4140.86  25
  -1  -4  13 67650.4 4805.64  28
   1  -4  13 88027.6 4232.15  25
   1  -4  13 75842.5 5111.03  28
   1  -4  13 81832.7 4167.16   4
  -1  -4  13 83004.9 4180.07   4
  -1  -4  13 72415.9 4198.74   9
  -1   4  14 19078.3 1373.83  33
  -1  -4  14 19095.4 1230.37  13
  -1  -4  14 17559.2 1120.74  10
   1  -4  14 18806.8 1201.58  25
   1  -4  14 17550.0 1896.32  28
  -1  -4  14 17974.5 1136.43  25
  -1  -4  14 19085.6 1184.62  18
  -1  -4  14 16748.2 1832.96  15
   1  -4  14 17900.8 2068.17  15
   1  -4  14 15464.3 1231.86  16
   1  -4  14 20364.2 1222.12  18
  -1  -4  14 17838.2 1163.53   4
   1  -4  14 17004.7 1145.37   4
  -1   4  15 11962.2 1036.49  33
  -1  -4  15 10849.6 787.518  14
  -1  -4  15 9950.45 767.008  10
  -1  -4  15 9796.95 1323.68  15
  -1  -4  15 12134.4 873.718  13
   1  -4  15 10869.7 759.020  14
   1  -4  15 9971.87 1451.78  15
  -1  -4  15 9915.38 770.079  25
   1  -4  15 11615.7 856.216  25
  -1  -4  15 11574.3 835.812  18
   1  -4  15 12150.1 874.444  18
   1  -4  15 9504.67 850.296  16
  -1  -4  15 10486.8 806.696   4
  -1   4  16 39860.6 2374.10  33
   1  -4  16 34226.6 2040.65  14
  -1  -4  16 37468.6 2105.85  14
  -1  -4  16 39165.1 2168.75  13
  -1  -4  16 36557.5 2078.87  10
  -1  -4  16 37055.7 2088.46  25
   1  -4  16 39263.3 2177.71  25
   1  -4  16 39017.1 2162.74  24
   1  -4  16 35412.2 2943.45  15
  -1  -4  16 41126.7 2169.78  18
   1  -4  16 31414.3 2092.03  16
   1  -4  16 40593.2 2200.51  18
  -1  -4  16 35366.7 2840.20  15
  -1   4  17 5341.60 652.598  33
  -1  -4  17 4725.90 482.408  10
  -1  -4  17 4657.02 475.254  14
   1  -4  17 4123.62 428.806  14
  -1  -4  17 4479.61 509.062  13
  -1  -4  17 4686.18 474.041  25
   1  -4  17 4385.55 514.281  25
   1  -4  17 4504.37 533.502  24
   1  -4  17 4229.08 535.660  18
  -1  -4  17 5489.11 549.353  18
  -1   4  18 25488.8 1662.11  33
  -1  -4  18 25930.0 1495.59  14
  -1  -4  18 27734.1 1520.64  13
   1  -4  18 20511.0 1384.81  10
  -1  -4  18 24998.0 1477.09  10
   1  -4  18 22368.3 1411.51  14
   1  -4  18 23423.5 1519.99  25
  -1  -4  18 22618.4 1441.47  25
   1  -4  18 24251.7 1530.11  24
  -1  -4  18 26090.6 1541.04  18
   1  -4  18 25008.1 1565.85  18
  -1   4  19 40320.9 2362.31  33
   1  -4  19 40588.5 2270.27  25
   1  -4  19 37375.9 2977.66  28
  -1  -4  19 35432.4 2138.85  25
  -1  -4  19 43981.3 2221.63  13
   1  -4  19 31044.5 2091.56  10
  -1  -4  19 42193.1 2225.23  14
  -1  -4  19 37582.3 2175.27  10
   1  -4  19 40140.7 2258.65  24
  -1  -4  19 40856.7 2255.68  18
   1  -4  19 40627.9 2298.40  18
   1   4  20 50246.9 2728.53  34
   1  -4  20 40535.3 2544.83  10
  -1  -4  20 51956.3 2634.24  13
  -1  -4  20 51047.8 2649.22  10
   1  -4  20 47514.9 2638.67  13
  -1  -4  20 47483.6 2645.58  14
   1  -4  20 47733.4 2685.90  25
   1  -4  20 40030.4 3268.76  28
  -1  -4  20 43797.5 2559.24  25
   1  -4  20 49322.3 2706.52  24
  -1  -4  20 51203.4 2719.42  18
   1  -4  20 51322.1 2757.84  18
   1   4  21 12144.9 929.329  34
  -1  -4  21 11310.0 868.309  14
   1  -4  21 12611.4 879.497  13
   1  -4  21 9570.45 802.864  10
  -1  -4  21 12374.5 885.152  10
  -1  -4  21 13305.8 862.853  13
   1  -4  21 12435.0 909.429  25
  -1  -4  21 9680.62 778.506  25
   1  -4  21 11607.4 933.081  24
   1  -4  21 14129.0 1004.26  18
  -1  -4  21 13245.3 956.707  18
   1   4  22 95702.6 4802.85  34
  -1   4  22 79713.1 5619.23  30
  -1  -4  22 98700.1 4717.32  13
  -1  -4  22 91678.6 4743.47  14
  -1  -4  22 89780.8 4723.49  10
   1  -4  22 93184.7 4719.84  13
   1  -4  22 91540.1 4762.80  25
  -1  -4  22 78983.3 4619.60  25
   1  -4  22 93090.8 4795.94  24
  -1  -4  22 95373.0 4801.44  18
   1  -4  22 96608.1 4836.90  18
  -1   4  23 29451.4 2647.86  30
   1   4  23 36297.1 2032.06  34
   1  -4  23 34893.2 1944.30  13
  -1  -4  23 36906.0 1947.35  13
  -1  -4  23 33302.2 1959.86  10
   1  -4  23 34132.6 1987.80  25
   1  -4  23 32762.2 2005.93  24
   1  -4  23 35420.2 2042.21  18
  -1  -4  23 35927.4 2027.68  18
  -1  -4  24 1258.38 311.967  18
   1  -4  24 1391.46 327.027  18
   1   4  24 1278.30 299.037  34
  -1  -4  24 1747.61 270.093  13
   1  -4  24 1347.64 269.405  13
   1  -4  24 1082.64 256.604  25
   1  -4  24 1277.27 329.061  24
  -1  -4  24 1438.93 289.017  10
  -1   4  25 15932.9 1069.93  34
   1   4  25 14539.2 1021.90  34
  -1  -4  25 18185.4 996.883  13
  -1  -4  25 15824.8 1001.44  10
   1  -4  25 15102.7 965.438  13
   1  -4  25 14085.0 995.293  25
   1  -4  25 16487.6 1058.10  24
  -1  -4  25 15959.6 1049.90  18
   1  -4  25 17560.7 1076.46  18
   1  -4  26 17182.6 1062.56  25
  -1  -4  26 18178.3 1035.38  13
  -1  -4  26 17393.8 1064.29  10
   1  -4  26 17292.1 1018.65  13
  -1  -4  26 16478.6 1089.40  18
   1  -4  26 17159.5 1107.51  18
   1   4  26 17767.1 1104.90  34
  -1   4  26 18375.9 1124.31  34
   1   4  27 2864.51 340.130  34
  -1   4  27 2555.51 337.009  34
   1  -4  27 2510.42 266.371  13
  -1  -4  27 2714.59 275.096  13
   1  -4  27 2501.38 298.097  25
   1  -4  27 3047.32 352.679  18
  -1  -4  27 3104.30 355.739  18
  -1  -4  27 2427.71 298.239  10
   1  -4  28 33312.7 1923.34  25
   1  -4  28 34878.1 1878.63  13
  -1  -4  28 38124.9 1905.23  13
  -1  -4  28 35989.3 1932.88  10
   1   4  28 38880.3 1987.14  34
  -1   4  28 37271.2 1979.73  34
   1  -4  28 37690.1 1983.86  18
  -1  -4  28 36529.0 1972.11  18
  -1  -4  29 36194.5 1832.54  13
  -1  -4  29 35996.0 1869.48  10
   1   4  29 35440.8 1907.08  34
  -1   4  29 35560.4 1904.23  34
   1  -4  29 34309.7 1903.05  18
  -1  -4  29 34698.1 1898.64  18
  -1  -4  30 6169.66 391.204  13
  -1   4  30 5489.18 444.106  34
   1   4  30 7529.58 482.572  34
   1  -4  30 6954.24 475.173  18
   1  -4  30 5286.21 443.825  17
  -1  -4  30 7044.07 472.167  18
  -1   4  31 9476.53 586.618  34
   1   4  31 10126.3 601.069  34
   1  -4  31 9151.49 590.884  17
  -1  -4  31 8851.78 581.882  18
  -1   4  32 37437.9 1864.35  34
   1   4  32 39566.4 1883.05  34
   1  -5 -27 1690.72 201.245  23
  -1  -5 -27 1815.17 203.300  23
  -1  -5 -26 8187.12 560.292  23
   1  -5 -26 8571.51 566.198  23
   1  -5 -25 34543.9 1857.49  23
  -1  -5 -25 34292.1 1851.20  23
  -1  -5 -24 2148.84 282.015  23
   1  -5 -24 2171.36 283.759  23
   1  -5 -23 39770.0 2166.06  23
   1  -5 -22 44826.1 2378.83   1
   1  -5 -22 44430.4 2427.21  23
   1  -5 -21 6064.43 532.405   1
   1  -5 -21 7352.83 605.874  23
   1  -5 -20 24112.1 1461.98   1
   1  -5 -20 26052.2 1528.10  23
   1  -5 -19 45984.8 2542.61   1
   1  -5 -19 47947.8 2620.24  23
   1  -5 -18 2027.71 440.936  27
   1  -5 -18 1874.37 309.503   1
   1  -5 -18 2340.65 404.712  23
   1  -5 -17 15449.0 1213.60  27
   1  -5 -17 15741.8 1039.08   1
  -1  -5 -17 17330.7 1174.62  23
   1  -5 -17 16120.1 1136.03  23
   1  -5 -16 16367.1 1234.25  27
   1  -5 -16 15858.5 1102.98  23
  -1  -5 -16 13885.1 1087.00  23
   1  -5 -16 15758.6 1012.83   1
   1  -5 -15 20122.4 1402.28  27
   1  -5 -15 17446.5 1138.59   1
  -1  -5 -15 20039.2 1288.10  23
   1  -5 -15 18012.8 1233.55  23
   1  -5 -15 17668.4 1914.85  31
   1  -5 -14 2772.40 757.549  31
   1  -5 -14 2760.62 450.229  16
   1  -5 -14 2958.72 517.047  27
  -1  -5 -14 2986.81 519.159  27
   1  -5 -14 3473.90 456.325  23
  -1  -5 -14 3010.69 456.428  23
   1  -5 -14 2921.78 359.098   1
   1  -5 -13 117317. 6407.39  16
  -1  -5 -13 122286. 6531.26  27
   1  -5 -13 127282. 6566.86  27
   1  -5 -13 127164. 6389.88  23
  -1  -5 -13 135770. 6445.46  23
   1  -5 -13 124892. 6283.69   1
   1  -5 -12 73220.3 3753.70   1
   1  -5 -12 72060.3 5115.39  15
   1  -5 -12 77524.6 3965.74  16
  -1  -5 -12 65987.1 4897.54  15
   1  -5 -12 67948.0 4971.55  31
  -1  -5 -12 72493.8 4032.03  27
   1  -5 -12 77933.1 3869.69  23
  -1  -5 -12 76639.9 3893.85  23
  -1  -5 -12 62921.3 3803.32   9
   1  -5 -11 1202.27 243.019   1
   1  -5 -11 2266.80 509.220  16
   1  -5 -11 2029.94 894.004  31
   1  -5 -11 1770.09 831.099  15
  -1  -5 -11 1415.24 748.277  15
  -1  -5 -11 1694.09 471.886  27
  -1  -5 -11 1679.29 332.288  23
   1  -5 -11 1744.69 334.303  23
  -1  -5 -11 1541.70 281.077   9
   1  -5 -10 56594.1 2953.98   1
   1  -5 -10 46059.3 4040.99  31
   1  -5 -10 46641.7 4215.80  15
   1  -5 -10 58984.4 3226.23  16
  -1  -5 -10 52159.2 4186.54  15
  -1  -5 -10 56679.0 3271.11  27
  -1  -5 -10 58319.8 3073.63  23
   1  -5 -10 60136.1 3046.57  23
  -1  -5 -10 53472.8 3042.62   9
   1  -5  -9 42922.1 2290.33   1
   1  -5  -9 44586.1 2590.04  16
   1  -5  -9 41127.0 3743.45  15
  -1  -5  -9 36425.0 3444.23  15
   1  -5  -9 35761.1 3305.18  31
  -1  -5  -9 42296.8 2592.39  27
   1  -5  -9 42622.9 2355.28  23
  -1  -5  -9 46591.0 2416.59  23
  -1  -5  -9 41996.9 2438.22   6
  -1  -5  -9 42794.7 2396.78   9
   1  -5  -8 8517.61 634.114   1
   1  -5  -8 9484.75 950.544  16
  -1  -5  -8 9790.20 700.337  17
   1  -5  -8 6516.29 1206.25  31
  -1  -5  -8 9467.86 1600.81  15
   1  -5  -8 9294.38 1706.15  15
   1  -5  -8 10030.6 862.414  27
  -1  -5  -8 8380.29 865.546  27
   1  -5  -8 8354.74 669.787  23
  -1  -5  -8 10340.7 739.830  23
  -1  -5  -8 10296.2 748.489   9
  -1  -5  -8 7948.26 758.775   6
   1  -5  -7 66216.3 3570.15   1
   1  -5  -7 57423.2 4569.17  31
   1  -5  -7 70450.4 5466.89  15
   1  -5  -7 79841.8 4017.87  16
  -1  -5  -7 75236.8 3688.20  17
   1  -5  -7 73785.6 3682.68  17
  -1  -5  -7 65673.4 5094.55  15
   1  -5  -7 76826.0 3874.99  27
  -1  -5  -7 69710.1 3897.16  27
   1  -5  -7 66379.5 3624.79  23
  -1  -5  -7 71524.9 3690.77  23
  -1  -5  -7 61420.3 3778.38   6
  -1  -5  -7 69530.2 3700.29   9
   1  -5  -6 38815.9 2247.06   1
   1  -5  -6 35531.6 3822.76  15
   1  -5  -6 48272.7 2714.66  16
  -1  -5  -6 43926.7 2357.94  17
  -1  -5  -6 42677.8 2576.36  16
   1  -5  -6 47662.0 2372.27  17
  -1  -5  -6 42661.6 3808.51  15
   1  -5  -6 29824.0 3011.52  31
  -1  -5  -6 40536.9 2547.16  27
   1  -5  -6 44128.8 2523.24  27
  -1  -5  -6 45408.6 2370.83  23
   1  -5  -6 43085.4 2314.15  23
  -1  -5  -6 38738.3 2508.53   6
  -1  -5  -6 46573.5 2409.12   9
   1  -5  -5 2028.24 253.581   1
   1  -5  -5 2417.53 316.936  17
  -1  -5  -5 2780.70 337.568  17
   1  -5  -5 2321.00 667.233  16
   1  -5  -5 2704.89 1172.43  15
  -1  -5  -5 1824.08 535.093  16
   1  -5  -5 1825.92 672.328  31
   1  -5  -5 2007.59 414.463  27
  -1  -5  -5 2738.92 486.350  27
  -1  -5  -5 2251.30 328.301   9
  -1  -5  -5 1787.98 410.923   6
   1  -5  -5 1639.49 264.932  23
  -1  -5  -5 2168.77 321.672  23
  -1  -5  -5 3545.70 1145.74  15
  -1  -5  -4 29334.5 1880.66  16
   1  -5  -4 28589.6 2006.56  16
   1  -5  -4 27945.4 1580.41  17
   1  -5  -4 25458.6 3161.94  15
  -1  -5  -4 27269.6 1582.55  17
  -1  -5  -4 24108.2 2884.23  15
  -1  -5  -4 27799.0 1580.52  23
   1  -5  -4 26436.2 1521.15  23
  -1  -5  -4 22705.3 1756.34   6
  -1  -5  -4 27360.3 1614.08   9
  -1  -5  -4 27184.0 1785.25  27
   1  -5  -4 27482.3 2512.35  28
  -1  -5  -3 103966. 7490.65  15
   1  -5  -3 121501. 6175.43  16
  -1  -5  -3 122433. 6059.94  16
  -1  -5  -3 114148. 5706.33  17
   1  -5  -3 115045. 5700.82  17
   1  -5  -3 108885. 7912.93  15
  -1  -5  -3 106521. 5890.29  27
   1  -5  -3 120391. 6918.05  28
   1  -5  -3 117927. 5795.39  26
   1  -5  -3 102031. 5609.84  23
  -1  -5  -3 113083. 5687.96  23
  -1  -5  -3 98761.0 5915.49   6
  -1  -5  -3 117579. 5749.08   9
   1  -5  -2 20977.7 1255.37   4
  -1  -5  -2 21245.2 1258.98   4
  -1  -5  -2 21421.8 2739.66  15
  -1  -5  -2 15262.8 1264.13  13
   1  -5  -2 23845.5 1730.58  16
  -1  -5  -2 22893.8 1609.35  16
   1  -5  -2 19368.1 2895.93  15
  -1  -5  -2 20664.8 1258.66  17
   1  -5  -2 22700.5 1273.92  17
  -1  -5  -2 19652.7 1427.23  27
   1  -5  -2 23046.8 1352.51  26
   1  -5  -2 19727.5 2051.39  28
   1  -5  -2 19354.7 1181.39  23
  -1  -5  -2 22175.2 1258.71  23
  -1  -5  -2 17692.4 1420.23   6
  -1  -5  -2 20891.8 1289.29   9
   1  -5  -1 26116.4 1457.51   4
  -1  -5  -1 24368.7 1447.00   4
  -1  -5  -1 20910.7 2816.55  15
  -1  -5  -1 19777.8 1501.79  13
   1  -5  -1 29039.0 1978.19  16
  -1  -5  -1 25862.9 1790.23  16
  -1  -5  -1 27893.5 1485.64  17
   1  -5  -1 25419.5 1453.75  17
   1  -5  -1 23474.9 3182.13  15
   1  -5  -1 24742.2 1513.79  26
   1  -5  -1 27359.4 2388.46  28
  -1  -5  -1 21119.3 1584.45  27
  -1  -5  -1 24319.0 1430.81  23
  -1  -5  -1 22092.2 1625.56   6
  -1  -5  -1 24244.1 1479.32   9
  -1  -5   0 42647.3 2292.44   4
   1  -5   0 43275.0 2291.58   4
  -1  -5   0 35384.3 2376.79  13
   1  -5   0 42603.9 4455.09  15
   1  -5   0 48223.8 2845.76  16
  -1  -5   0 42698.0 2647.35  16
  -1  -5   0 35506.8 3869.90  15
  -1  -5   0 42278.1 2302.30  17
   1  -5   0 45323.3 2313.24  17
  -1  -5   0 37927.7 2441.11  27
   1  -5   0 44802.3 2377.23  26
   1  -5   0 44849.5 3331.18  28
  -1  -5   0 42305.0 2270.66  23
  -1  -5   0 38093.4 2473.50   6
   1  -5   0 36064.8 2369.42   9
  -1  -5   0 43406.5 2339.70   9
  -1  -5   1 24081.8 1402.23   4
   1  -5   1 23170.8 1388.29   4
  -1  -5   1 18613.3 1498.92  13
   1  -5   1 24700.8 1466.80  26
  -1  -5   1 21414.3 1535.87  27
   1  -5   1 22518.9 2223.95  28
   1  -5   1 29481.3 1985.81  16
   1  -5   1 18828.0 2964.10  15
  -1  -5   1 24671.6 1736.25  16
  -1  -5   1 25401.8 1430.96  17
   1  -5   1 25839.7 1421.95  17
  -1  -5   1 23707.8 1376.42  23
  -1  -5   1 23872.1 1439.01   9
   1  -5   1 20127.5 1479.88   9
  -1  -5   1 22641.1 1585.32   6
   1  -5   2 25245.2 1455.17   4
  -1  -5   2 24345.8 1451.91   4
  -1  -5   2 22058.7 2218.41  28
   1  -5   2 22521.4 2249.25  28
  -1  -5   2 23946.8 1611.78  27
   1  -5   2 24951.8 1518.85  26
  -1  -5   2 25342.1 1481.53  17
   1  -5   2 25696.8 1467.73  17
  -1  -5   2 24851.0 1432.93  23
  -1  -5   2 26104.0 1512.01   9
   1  -5   2 21238.6 1529.36   9
  -1  -5   3 122143. 5846.19   4
   1  -5   3 120706. 5832.54   4
  -1  -5   3 117379. 5862.40  17
   1  -5   3 115774. 5840.46  17
  -1  -5   3 107460. 5961.64  27
   1  -5   3 109987. 6889.58  28
  -1  -5   3 101500. 6766.19  28
  -1  -5   3 111798. 5884.16  26
   1  -5   3 114737. 5889.80  26
  -1  -5   3 113638. 5791.82  23
  -1  -5   3 107658. 5864.53   9
  -1  -5   4 35797.0 1869.14   4
   1  -5   4 33670.0 1850.59   4
  -1  -5   4 26439.2 1953.89  13
  -1  -5   4 31096.6 3273.22  15
   1  -5   4 28082.8 3432.39  15
  -1  -5   4 35812.8 1902.36  17
   1  -5   4 35283.9 1881.14  17
  -1  -5   4 31505.2 1890.55  26
  -1  -5   4 28605.9 1911.34  27
  -1  -5   4 23963.1 2491.49  28
   1  -5   4 32186.1 2760.30  28
   1  -5   4 33455.6 1912.55  26
  -1  -5   4 32700.6 1812.16  23
  -1  -5   4 33432.2 1907.51   9
   1  -5   5 1421.18 253.732  17
   1  -5   5 986.139 527.927  16
   1  -5   5 2434.82 1227.01  15
  -1  -5   5 777.383 444.204  16
  -1  -5   5 1987.27 304.654  17
  -1  -5   5 920.086 890.963  15
  -1  -5   5 1135.37 360.175  13
   1  -5   5 1388.79 303.700  26
  -1  -5   5 1639.85 310.930  26
   1  -5   5 1564.65 626.642  28
  -1  -5   5 597.405 438.047  28
  -1  -5   5 1795.04 279.677   4
   1  -5   5 1391.16 260.538   4
  -1  -5   5 1321.59 288.541   9
   1  -5   6 32645.1 3578.13  15
  -1  -5   6 37217.4 2246.00  16
   1  -5   6 37709.9 2344.37  16
  -1  -5   6 29477.2 3176.83  15
  -1  -5   6 38621.1 2067.84  17
   1  -5   6 36736.9 2034.14  17
  -1   5   6 34119.6 2148.18  33
  -1  -5   6 31460.1 2099.73  13
  -1  -5   6 33444.7 2037.18  26
   1  -5   6 34530.0 2943.60  28
  -1  -5   6 31797.8 2811.41  28
   1  -5   6 35886.9 2067.26  26
  -1  -5   6 40266.2 2045.73   4
   1  -5   6 35966.7 2003.89   4
  -1  -5   6 35752.4 2073.92   9
   1  -5   7 67662.6 3763.77  16
  -1  -5   7 59516.6 4823.37  15
  -1  -5   7 69446.5 3536.30  17
   1  -5   7 68539.8 3514.79  17
   1  -5   7 64911.5 5212.90  15
  -1  -5   7 62439.4 3656.85  16
  -1   5   7 66431.4 3653.89  33
  -1  -5   7 61994.0 3582.17  13
   1  -5   7 67896.3 3545.92  26
   1  -5   7 59675.1 4451.22  28
  -1  -5   7 59177.4 4368.31  28
  -1  -5   7 62319.2 3503.82  26
   1  -5   7 69676.6 3488.73   4
  -1  -5   7 69884.7 3500.87   4
  -1  -5   7 61848.6 3532.94   9
  -1  -5   8 5274.39 511.579  17
   1  -5   8 5410.64 507.024  17
   1  -5   8 2985.31 1114.12  15
   1  -5   8 4103.30 705.151  16
  -1   5   8 4969.28 624.466  33
  -1  -5   8 4973.29 581.488  13
  -1  -5   8 4607.37 1170.77  15
   1  -5   8 5775.95 1057.04  28
   1  -5   8 6089.26 565.516  25
   1  -5   8 4800.46 524.304  26
  -1  -5   8 4213.34 487.617  26
  -1  -5   8 6615.32 1059.17  28
  -1  -5   8 5985.40 512.270   4
   1  -5   8 5200.29 485.563   4
  -1  -5   8 5004.64 536.146   9
  -1  -5   9 51915.5 4214.24  15
   1  -5   9 50952.2 4369.51  15
   1  -5   9 57763.0 3239.10  16
  -1  -5   9 60791.8 3087.14  17
   1  -5   9 58024.9 3054.02  17
  -1   5   9 55315.8 3208.78  33
  -1  -5   9 54625.3 3110.85  13
   1  -5   9 50191.9 3964.92  28
   1  -5   9 61462.6 3095.59  25
   1  -5   9 55785.0 3070.97  26
  -1  -5   9 48301.9 2998.21  26
   1  -5   9 57840.1 3021.60   4
  -1  -5   9 59637.6 3040.90   4
  -1  -5   9 54871.6 3101.36   9
   1  -5  10 60634.0 4631.17  15
   1  -5  10 65771.3 3416.54  16
  -1  -5  10 62105.0 3261.81  17
   1  -5  10 63846.1 3257.45  17
  -1  -5  10 54049.0 4333.88  15
  -1   5  10 59129.8 3418.12  33
  -1  -5  10 61462.9 3297.30  13
  -1  -5  10 53991.0 3185.56  26
   1  -5  10 55794.8 4204.31  28
   1  -5  10 53610.8 3223.52  26
   1  -5  10 61694.5 3260.67  25
  -1  -5  10 60244.1 3294.51   9
  -1  -5  10 62277.2 3223.73   4
   1  -5  10 62365.5 3213.72   4
   1  -5  11 739.436 255.824  17
   1  -5  11 922.495 429.325  16
  -1  -5  11 1338.61 299.542  17
  -1   5  11 1134.32 369.872  33
  -1  -5  11 1238.57 324.369  13
   1  -5  11 384.629 696.059  15
  -1  -5  11 519.834 604.730  15
   1  -5  11 850.716 282.261  26
   1  -5  11 984.281 527.068  28
   1  -5  11 918.274 261.793  25
   1  -5  11 656.363 217.748   4
  -1  -5  11 870.671 245.034   4
  -1   5  12 72578.8 4064.49  33
  -1  -5  12 69308.1 3923.11  13
   1  -5  12 63240.9 4839.58  28
   1  -5  12 70957.8 3918.72  26
   1  -5  12 80820.0 3966.84  25
   1  -5  12 60203.8 4926.35  15
   1  -5  12 69432.6 3968.73  16
  -1  -5  12 77733.7 3952.72  17
   1  -5  12 78062.0 3939.07  17
  -1  -5  12 73568.9 5025.52  15
   1  -5  12 75756.7 3894.45   4
  -1  -5  12 75208.0 3899.94   4
  -1   5  13 107579. 5848.36  33
   1  -5  13 109345. 5626.80  14
   1  -5  13 114934. 5755.56  25
   1  -5  13 100783. 6748.68  28
   1  -5  13 106592. 5726.76  26
   1  -5  13 104778. 6874.89  15
   1  -5  13 104579. 5751.30  16
  -1  -5  13 119749. 5778.66  17
   1  -5  13 114953. 5754.00  17
  -1  -5  13 107972. 6797.40  15
  -1  -5  13 116414. 5729.23   4
   1  -5  13 111105. 5703.18   4
  -1   5  14 4879.40 621.624  33
   1  -5  14 5202.48 477.423  14
   1  -5  14 4538.49 1027.70  15
  -1  -5  14 6801.12 1107.27  15
  -1  -5  14 5710.80 524.194  14
   1  -5  14 5971.25 1091.44  28
   1  -5  14 6006.61 592.652  25
   1  -5  14 5846.80 580.347  26
   1  -5  14 5880.08 576.874  17
  -1  -5  14 6042.38 585.749  17
   1  -5  14 5374.05 591.459  16
  -1  -5  14 5856.28 551.537   4
   1  -5  15 15068.1 1006.42  25
   1  -5  15 11111.3 1485.78  28
   1  -5  15 12796.7 937.335  26
   1  -5  15 12867.9 876.193  14
  -1  -5  15 14559.1 941.820  14
  -1   5  15 14494.6 1068.09  33
   1  -5  15 12031.3 951.661  16
  -1  -5  15 14416.1 998.015  17
   1  -5  15 13423.2 978.773  17
   1  -5  16 9927.50 820.387  25
   1  -5  16 9378.07 750.330  26
  -1  -5  16 10812.5 832.506  17
   1  -5  16 10133.1 811.259  17
   1  -5  16 9892.83 715.704  14
  -1  -5  16 11459.7 789.503  14
  -1  -5  16 11154.9 802.935  13
   1  -5  17 13448.6 964.681  25
   1  -5  17 10611.3 838.581  26
  -1  -5  17 13071.9 972.440  17
   1  -5  17 12548.7 949.457  17
   1  -5  17 14018.0 962.351  13
  -1  -5  17 13566.3 910.355  14
  -1  -5  17 14911.9 933.320  13
   1   5  18 2000.30 416.024  34
  -1  -5  18 1999.55 317.209  14
   1  -5  18 2275.48 377.226  13
  -1  -5  18 2230.51 342.799  13
   1  -5  18 2833.94 392.769  25
   1  -5  18 1980.32 356.052  17
  -1  -5  18 2324.98 378.480  17
  -1  -5  19 56122.4 2852.62  14
  -1  -5  19 56758.8 2835.46  13
   1  -5  19 52911.3 2850.04  13
   1  -5  19 51217.4 2849.97  25
   1   5  19 53901.2 2913.42  34
  -1  -5  19 48730.6 2896.39  17
   1  -5  19 47405.4 2879.94  17
   1  -5  20 23400.7 1485.41  25
   1  -5  20 25773.2 1495.09  13
  -1  -5  20 27544.6 1486.43  13
  -1  -5  20 25993.1 1498.01  14
   1  -5  20 24127.7 1554.59  17
  -1  -5  20 24044.4 1560.25  17
   1   5  20 26914.9 1564.76  34
   1  -5  21 6141.62 521.773  25
  -1  -5  21 6938.69 522.290  13
   1  -5  21 6168.33 519.682  13
  -1  -5  21 6044.06 507.731  14
   1  -5  21 6129.03 566.341  17
  -1  -5  21 4981.08 537.063  17
   1   5  21 7255.99 597.521  34
   1  -5  22 36810.2 2169.52  25
   1  -5  22 43910.9 2195.25  13
  -1  -5  22 44277.4 2191.49  13
   1  -5  22 37706.8 2227.68  17
  -1  -5  22 38383.9 2243.83  17
   1   5  22 43212.8 2252.48  34
   1  -5  23 30647.2 1893.98  25
   1  -5  23 32590.9 1954.76  17
  -1  -5  23 34214.8 1976.24  17
   1  -5  23 38484.1 1926.99  13
  -1  -5  23 40619.9 1934.40  13
   1   5  23 39438.7 1989.73  34
  -1  -5  24 948.559 205.753  17
   1  -5  24 1002.57 200.394  17
   1  -5  24 1415.97 212.142  13
  -1  -5  24 1759.83 222.584  13
   1   5  24 1707.89 259.300  34
  -1  -5  25 27280.5 1632.05  17
   1  -5  25 27914.4 1624.64  17
   1  -5  25 30525.0 1587.04  13
  -1  -5  25 31938.5 1598.05  13
   1   5  25 32085.1 1649.03  34
   1  -5  26 6973.06 523.762  17
   1  -5  26 8207.67 498.456  13
  -1  -5  26 8537.52 508.010  13
   1   5  26 8813.49 558.414  34
   1  -5  27 1349.29 167.416  17
   1   5  27 1357.28 180.093  34
  -1   5  27 1348.92 179.741  34
  -1  -5  27 1474.76 153.960  13
   1  -5  27 1142.77 133.058  13
  -1  -5  28 15200.6 801.602  13
  -1  -6 -23 7354.70 433.865   4
  -1  -6 -22 29926.7 1338.99   4
   1  -6 -22 22275.5 1290.00   4
   1  -6 -21 4260.43 315.230   4
  -1  -6 -21 4865.81 349.598   4
  -1  -6 -20 14746.9 828.580  23
   1  -6 -20 12713.4 786.532   4
  -1  -6 -20 13932.6 821.559   4
  -1  -6 -19 18872.8 983.695  23
   1  -6 -19 14189.0 920.166   4
  -1  -6 -18 7826.70 566.903  23
   1  -6 -18 7631.43 546.085   4
  -1  -6 -17 7859.89 566.084  23
   1  -6 -17 6169.61 513.117   4
  -1  -6 -16 22118.6 1255.63  23
   1  -6 -16 19151.3 1203.65   4
  -1  -6 -15 9793.36 716.346  23
   1  -6 -15 9427.35 685.826   4
  -1  -6 -14 6102.65 524.806  23
   1  -6 -14 5487.70 490.125   4
  -1  -6 -13 29812.5 1689.51  23
   1  -6 -13 28580.1 1664.32   4
  -1  -6 -13 29773.4 1684.45   4
  -1  -6 -12 43561.0 2334.79  23
   1  -6 -12 40154.0 2300.86   4
  -1  -6 -12 44215.0 2341.29   4
  -1  -6 -11 4480.52 435.858  23
   1  -6 -11 3043.56 510.183  27
  -1  -6 -11 3635.74 397.131   4
   1  -6 -11 3714.82 397.561   4
  -1  -6 -10 46343.1 2520.72  23
   1  -6 -10 46683.6 2683.88  27
   1  -6 -10 45883.1 2516.86   4
  -1  -6 -10 47786.7 2538.57   4
  -1  -6  -9 9917.26 725.071  23
   1  -6  -9 8087.01 827.249  27
   1  -6  -9 10422.0 731.288   4
  -1  -6  -9 11022.3 750.728   4
   1  -6  -8 91.7137 290.741  27
   1  -6  -8 519.195 199.805   4
  -1  -6  -8 312.442 180.515   4
  -1  -6  -8 506.153 207.956  23
   1  -6  -8-119.523 322.200  16
   1  -6  -7 16444.9 1190.10  16
   1  -6  -7 15057.9 1175.94  27
   1  -6  -7 17937.9 1064.44   4
  -1  -6  -7 18736.9 1084.95   4
  -1  -6  -7 16030.1 1038.03  23
  -1  -6  -7 15104.9 1057.19   9
   1  -6  -6 32736.6 1913.22  16
   1  -6  -6 29421.5 1867.56  27
  -1  -6  -6 27295.6 1806.91  27
   1  -6  -6 30867.2 1725.80   4
  -1  -6  -6 33699.7 1757.71   4
  -1  -6  -6 30467.0 1707.49  23
  -1  -6  -6 27763.8 1739.88   9
   1  -6  -5 8481.84 805.490  16
   1  -6  -5 6876.99 724.188  27
  -1  -6  -5 6316.47 675.687  27
  -1  -6  -5 8712.75 622.752   4
   1  -6  -5 8093.46 595.127   4
  -1  -6  -5 7023.03 571.369  23
  -1  -6  -5 6989.11 619.328   9
   1  -6  -4 26491.2 1687.79  16
  -1  -6  -4 27240.8 1492.66  17
  -1  -6  -4 22452.3 1562.33  27
   1  -6  -4 22728.2 1581.87  27
  -1  -6  -4 26226.7 1483.59   4
   1  -6  -4 27634.7 1483.85   4
  -1  -6  -4 24431.1 1431.40  23
  -1  -6  -4 22055.7 1481.89   9
   1  -6  -3 44529.7 2432.66  16
  -1  -6  -3 42370.2 2184.75  17
  -1  -6  -3 33629.7 2241.14  27
   1  -6  -3 37025.2 2286.50  27
  -1  -6  -3 42436.0 2184.43   4
   1  -6  -3 43671.1 2177.81   4
  -1  -6  -3 36288.5 2107.68  23
  -1  -6  -3 35402.0 2181.15   9
   1  -6  -2 18529.4 1107.55  17
   1  -6  -2 18530.5 1355.62  16
  -1  -6  -2 19951.3 1140.89  17
  -1  -6  -2 15759.9 1202.69  27
   1  -6  -2 16623.4 1228.40  27
  -1  -6  -2 18268.4 1123.71   4
   1  -6  -2 19362.2 1120.46   4
  -1  -6  -2 16872.0 1068.53  23
  -1  -6  -2 15481.5 1131.39   9
   1  -6  -1 7325.95 566.975  17
  -1  -6  -1 7578.00 585.526  17
  -1  -6  -1 5477.15 572.733   9
   1  -6  -1 8250.03 596.243   4
  -1  -6  -1 6522.44 567.725   4
   1  -6  -1 5207.89 650.795  27
   1  -6   0 63797.8 3431.26  16
  -1  -6   0 60970.6 3148.79  17
   1  -6   0 59322.7 3125.16  17
  -1  -6   0 54722.3 3171.03   9
  -1  -6   0 61572.6 3146.47   4
   1  -6   0 62231.0 3136.13   4
   1  -6   0 51355.7 3217.92  27
   1  -6   1 9281.28 928.120  16
  -1  -6   1 8515.74 643.049  17
   1  -6   1 8163.71 619.292  17
  -1  -6   1 7320.97 665.454   9
  -1  -6   1 8231.84 644.023   4
   1  -6   1 9573.27 649.517   4
   1  -6   1 6747.85 717.284  27
  -1  -6   2 20705.9 1203.59  17
   1  -6   2 18893.8 1166.84  17
  -1  -6   2 18657.2 1227.63   9
   1  -6   2 20384.0 1179.20   4
  -1  -6   2 19718.3 1189.37   4
  -1  -6   3 44485.7 2322.98  17
   1  -6   3 44414.8 2303.18  17
   1  -6   3 42089.9 2358.12  26
   1  -6   3 36706.2 2364.45  27
  -1  -6   3 37416.6 2331.42   9
  -1  -6   3 43726.2 2311.45   4
   1  -6   3 43149.1 2293.58   4
  -1  -6   4 23060.0 1560.08  13
  -1  -6   4 30246.7 1593.30  17
   1  -6   4 26541.6 1540.78  17
   1  -6   4 24768.8 1584.63  26
   1  -6   4 22296.8 1595.04  27
  -1  -6   4 25306.4 1595.70   9
   1  -6   4 29479.6 1561.03   4
  -1  -6   4 30822.5 1584.63   4
   1  -6   5 6367.95 642.793  26
  -1  -6   5 6572.51 661.686  13
   1  -6   5 8447.08 627.869   4
  -1  -6   5 9825.49 666.710   4
   1  -6   5 8398.09 837.147  16
  -1  -6   5 9319.06 664.527  17
   1  -6   5 8641.14 638.970  17
   1  -6   6 26135.4 1682.90  26
  -1  -6   6 26758.4 1687.68  13
   1  -6   6 28417.4 1651.03   4
  -1  -6   6 31364.3 1685.77   4
   1  -6   6 30020.6 1836.71  16
  -1  -6   6 30446.1 1687.68  17
   1  -6   6 29494.0 1666.06  17
   1  -6   7 15084.2 991.352  26
  -1  -6   7 12161.2 938.465  13
  -1  -6   7 14540.7 938.119   4
   1  -6   7 14454.3 928.910   4
   1  -6   7 13691.6 924.292  17
   1  -6   7 13435.5 1065.57  16
  -1  -6   7 14763.3 953.300  17
   1  -6   8 419.038 204.244  26
  -1  -6   8 301.483 214.058  13
   1  -6   8 81.5376 155.473   4
  -1  -6   8 169.494 172.700   4
  -1  -6   8 150.313 179.118  17
   1  -6   8 86.0036 163.963  17
   1  -6   8 157.724 314.033  16
   1  -6   9 8801.49 723.494  26
  -1  -6   9 8737.83 705.493  13
   1  -6   9 9760.35 762.403  13
  -1  -6   9 10329.5 724.745   4
   1  -6   9 9648.48 701.954   4
   1  -6   9 9573.47 805.806  16
  -1  -6   9 9349.22 711.820  17
   1  -6   9 10069.7 722.018  17
   1  -6  10 39446.1 2302.54  26
  -1  -6  10 42169.0 2302.96  13
   1  -6  10 40824.7 2331.37  13
   1  -6  10 41870.9 2230.96  14
  -1  -6  10 44506.2 2324.89   4
  -1  -6  10 43538.6 2327.28  17
   1  -6  10 42216.8 2308.44  17
  -1  -6  11 3687.17 414.231  17
   1  -6  11 3192.78 389.665  17
   1  -6  11 3760.25 345.809  14
  -1  -6  11 4347.68 418.960  13
  -1  -6  11 4270.55 397.339  14
   1  -6  11 3223.85 406.440  13
   1  -6  11 3534.25 391.865  26
  -1  -6  12 46966.4 2378.49  13
   1  -6  12 41967.0 2295.26  14
   1  -6  12 41655.5 2383.26  13
  -1  -6  12 48303.0 2383.94  14
  -1  -6  12 44319.4 2410.89  17
   1  -6  12 41573.5 2383.70  17
  -1  -6  13 29436.6 1717.52  13
  -1  -6  13 33039.4 1745.15  14
  -1  -6  13 31175.6 1778.07  17
   1  -6  13 31154.4 1767.76  17
  -1  -6  14 8044.95 543.709  13
  -1  -6  14 6770.36 532.576  14
  -1  -6  14 6714.24 561.131  17
   1  -6  14 5824.17 534.346  17
   1   6  14 6217.10 583.210  34
  -1  -6  15 8329.49 561.281  13
  -1  -6  15 7667.28 565.612  14
   1   6  15 8373.59 641.612  34
  -1  -6  15 7009.40 586.962  17
   1  -6  15 6575.05 574.418  17
   1   6  16 17487.9 1077.01  34
  -1  -6  16 16721.4 1075.93  17
   1  -6  16 16142.5 1058.55  17
   1  -6  16 17835.4 1038.24  13
  -1  -6  16 18129.4 1038.53  14
   1  -6  17 4659.20 396.783  13
  -1  -6  17 5563.74 411.055  14
  -1   6  17 5019.02 481.406  34
   1   6  17 4963.80 440.661  34
  -1  -6  17 5106.12 451.106  17
   1  -6  17 4153.23 409.909  17
   1  -6  18 10211.6 635.520  13
  -1   6  18 9730.36 699.712  34
   1   6  18 10432.6 667.852  34
  -1  -6  18 10134.3 676.514  17
   1  -6  18 8494.58 637.595  17
  -1   6  19 20446.5 1140.56  34
   1   6  19 19020.1 1091.52  34
  -1  -6  19 18758.0 1108.10  17
   1  -6  19 16744.3 1073.17  17
  -1  -6  19 19762.5 1063.75  13
   1  -6  19 20731.5 1080.38  13
  -1   6  20 15056.9 921.223  34
   1  -6  20 15671.1 877.585  13
  -1  -6  20 16538.5 876.096  13
  -1  -6  20 14713.7 902.803  17
  -1  -6  21 5890.71 395.291  13
   1  -6  21 6419.48 404.871  13
   1  -6  22 31811.1 1703.31  13
  -1  -6  22 35377.4 1712.57  13
  -1  -6  23 9446.78 488.591  13
   1  -6  23 7942.33 473.708  13
  -1  -7 -12 5583.24 364.484   4
  -1  -7 -11 277.209 94.7701   4
  -1  -7 -10 7989.69 512.109   4
  -1  -7  -9 13211.6 706.086   4
   1  -7  -9 10407.2 656.187   4
   1  -7  -8 1048.54 152.016   4
  -1  -7  -8 1160.76 171.799   4
   1  -7  -7 8132.11 554.361   4
  -1  -7  -7 10572.9 601.315   4
  -1  -7  -6 12144.6 673.450   4
   1  -7  -6 9355.07 626.867   4
   1  -7  -5 838.514 164.839   4
  -1  -7  -5 1220.10 195.058   4
  -1  -7  -4 5782.89 435.473   4
   1  -7  -4 5434.08 413.332   4
   1  -7  -3 25837.4 1442.31   4
  -1  -7  -3 28382.0 1474.89   4
   1  -7  -2 4914.80 360.787   4
  -1  -7  -2 4140.72 359.730   4
   1  -7  -1 7001.83 479.582   4
  -1  -7  -1 7005.45 488.451   4
   1  -7   0 13272.7 802.938   4
  -1  -7   0 14229.4 825.911   4
  -1  -7   1 7582.09 505.509   4
   1  -7   1 7064.88 488.988   4
  -1  -7   2 4233.66 321.186   4
   1  -7   2 2876.51 242.721  14
  -1  -7   3 23730.9 1307.85   4
  -1  -7   4 6526.71 448.405  14
  -1  -7   5 1457.21 189.393  14
  -1  -7   6 10524.9 636.086  14
  -1  -7   7 10094.5 608.019  14
  -1  -7   8 863.488 134.596  14
  -1  -7   9 13485.8 751.773  14
   2   0 -35 121360. 6006.20   1
   2   0 -34 18026.7 1013.58   1
   2   0 -16 37996.4 2636.04  31
   2   0 -15 210409. 11098.4  31
  -2   0 -14 50497.6 2812.02   8
   2   0 -14 53186.0 3338.52  31
  -2   0 -13 200893. 10777.8   8
   2   0 -13 260633. 11555.6  31
   2   0 -12 157892. 8460.19  31
   2   0 -11 123094. 6636.72  31
   2   0 -10 54320.2 3174.33  31
   2   0  -9 450239. 22298.9  31
  -2   0  -7 391868. 19277.0  38
  -2   0  -6 16191.4 1095.64  38
  -2   0  -5 111188. 5773.63  38
   2   0  -4 69582.8 3514.04  28
  -2   0  -4 79984.9 3910.87  38
  -2   0  -3 397331. 19759.5  38
  -2   0  -2 137186. 7203.39  38
  -2   0  -1 335754. 16922.7  38
  -2   0   0 41139.5 2185.61  32
   2   0   1 293918. 14521.7  29
  -2   0   1 300689. 14584.6  32
   2   0   2 193148. 9523.01  29
  -2   0   2 192944. 9567.80  32
   2   0   3 321321. 15962.6  29
  -2   0   3 347503. 16490.0  38
  -2   0   3 323271. 15992.1  32
   2   0   4 88663.6 4626.82  29
   2   0   4 89446.8 4564.21  30
   2   0   5 124701. 6418.98  29
   2   0   5 125724. 6336.33  30
  -2   0   5 135658. 6875.64  38
   2   0   6 5379.08 485.716  30
  -2   0   6 6032.95 799.326  38
   2   0   7 461737. 22884.2  30
  -2   0   7 474782. 23309.3  38
  -2   0   8 186849. 9553.18  38
   2   0   8 179645. 9222.65  30
  -2   0   9 347375. 17668.5  38
   2   0   9 350984. 17454.5  30
  -2   0  10 71034.2 4077.77  38
   2   0  10 69052.9 3981.53  30
  -2   0  11 104875. 5719.77  38
   2   0  11 102238. 5732.47  30
   2   0  12 121298. 6735.76  30
  -2   0  13 204662. 9878.24  20
  -2   0  13 201775. 10416.9  30
   2   0  13 196677. 9829.88  34
   2   0  13 212094. 10693.6  30
  -2   0  13 187014. 9992.23   8
  -2   0  14 61803.6 3282.12  20
  -2   0  14 62787.3 3249.28  19
   2   0  14 64286.2 3218.82  34
  -2   0  14 61336.8 3740.66  30
  -2   0  14 55563.4 3311.89   8
  -2   0  15 218654. 9856.58  20
  -2   0  15 202319. 9739.48  19
   2   0  15 200578. 9703.02  34
   2   0  15 220832. 10620.0  30
  -2   0  15 184022. 9720.00  33
  -2   0  15 214864. 10377.8  30
  -2   0  15 172130. 9722.12   8
  -2   0  16 29840.9 1693.94  19
   2   0  16 30826.0 1671.01  34
  -2   0  16 28843.6 1689.56  33
  -2   0  16 29721.0 2176.75  30
   2   0  16 33485.1 2380.23  30
  -2   0  16 29859.7 1763.35  20
  -2   0  17 139993. 7028.02  19
   2   0  17 155465. 7848.88  30
  -2   0  17 151495. 7700.67  30
  -2   0  17 137691. 6935.33  34
   2   0  17 138159. 7000.54  34
  -2   0  17 138460. 7098.53  20
  -2   0  18 57421.2 2845.40  19
   2   0  18 54156.0 3486.71  30
  -2   0  18 59337.2 3490.90  30
   2   0  18 54008.4 2810.12  34
  -2   0  18 50824.4 2738.31  34
  -2   0  18 50393.7 2878.09  20
  -2   0  19 311322. 14817.4  19
   2   0  19 320163. 15614.7  30
   2   0  19 306448. 14795.9  34
  -2   0  19 286490. 14719.2  34
  -2   0  19 327172. 15568.2  30
  -2   0  19 291664. 14866.9  20
  -2   0  20 39235.1 2105.09  19
  -2   0  20 39184.0 2165.21  20
  -2   0  20 40651.6 2735.82  30
   2   0  20 43146.8 2815.62  30
   2   0  20 38539.0 2090.48  34
  -2   0  20 35837.2 2017.88  34
  -2   0  21 9564.43 691.854  19
   2   0  21 8076.56 1091.42  30
   2   0  21 9404.54 681.848  34
  -2   0  21 9267.29 626.847  34
  -2   0  21 11171.5 1207.19  30
  -2   0  22 62467.2 3245.56  19
  -2   0  22 59203.7 3165.53  34
   2   0  22 64925.3 3981.16  30
  -2   0  22 63747.7 3955.45  30
   2   0  22 62859.1 3243.41  34
  -2   0  23 101946. 4902.40  19
   2   0  23 95061.1 5619.58  30
   2   0  23 94419.9 4885.23  34
  -2   0  23 91749.1 4808.09  34
  -2   0  24 23292.5 1338.80  19
   2   0  24 19835.5 1898.88  30
   2   0  24 23136.6 1339.75  34
  -2   0  24 21269.2 1261.08  34
   2   0  25 201752. 10465.6  29
   2   0  25 196862. 10386.0  30
   2   0  25 198272. 9557.72  34
  -2   0  25 183671. 9465.68  34
   2   0  25 187953. 9533.11  35
  -2   0  25 195164. 9548.70  19
   2   0  26 49328.2 2637.45  35
  -2   0  26 47917.1 2570.88  34
   2   0  26 50593.5 2653.69  34
   2   0  26 46037.8 3353.03  29
   2   0  26 50326.6 3414.00  30
   2   0  27 12760.4 849.379  35
  -2   0  27 12620.9 800.552  34
   2   0  27 12489.3 860.548  34
   2   0  27 11683.8 1383.58  30
   2   0  27 12092.0 1419.69  29
   2   0  28 25046.6 1444.40  35
  -2   0  28 25121.7 1387.35  34
   2   0  28 21667.0 2033.43  30
   2   0  28 21448.3 2059.19  29
  -2   0  29 68086.2 3619.86  35
   2   0  29 75319.0 3728.38  35
  -2   0  29 72601.7 3658.04  34
   2   0  29 70371.0 4508.18  30
   2   0  29 73058.7 4576.01  29
   2   0  30 23893.9 1323.99  35
  -2   0  30 20892.2 1242.06  34
   2   0  30 22085.6 1974.78  29
   2   0  30 21501.3 1947.79  30
   2   0  31 54858.8 2762.11  35
  -2   0  31 50720.5 2686.52  34
  -2   0  31 50128.2 3337.51  29
   2   0  31 47477.4 3442.99  30
   2   0  31 53882.2 3560.32  29
   2   0  32 9659.43 687.817  35
  -2   0  32 10325.2 694.369  10
   2   0  33 21264.3 1253.33  35
  -2   0  33 22407.6 1251.92  10
   2   0  34 15290.4 931.553  35
  -2   0  34 15852.6 926.797  10
   2   0  35 95999.1 4945.64  35
  -2   0  35 101260. 4941.00  10
   2   0  36 4528.88 369.284  35
  -2   0  36 5531.17 379.366  10
  -2   0  37 3294.00 257.636  10
   2   0  37 2920.12 256.019  35
   2   0  37 3157.90 275.775  34
   2   0  38 2732.51 228.530  24
  -2   0  38 2335.23 197.006  10
   2   0  38 2754.01 231.647  34
   2   0  40 4923.08 303.099  10
   2  -1 -38 31626.3 1598.14   1
   2  -1 -37 7473.56 460.222   1
   2  -1 -36 35953.0 1866.74   1
   2  -1 -35 13316.2 787.483   1
   2  -1 -34 49315.5 2557.12   1
   2  -1 -33 14828.3 895.179   1
  -2  -1 -27 13822.6 881.711  23
   2  -1 -21 44530.4 3345.65  31
   2  -1 -20 157994. 9002.68  31
   2  -1 -19 11212.7 1524.59  31
   2  -1 -18 41501.0 3238.76  31
   2  -1 -17 42350.8 3312.54  31
   2  -1 -16 269404. 14355.8  31
   2  -1 -15 57330.4 3802.92  31
   2  -1 -14 205.415 420.805  31
   2  -1 -13 57640.0 3600.81  31
   2  -1 -12 235180. 12147.7  31
  -2  -1 -11 62844.1 3689.77   8
  -2  -1 -10 480397. 24025.9   8
   2  -1  -9 89212.2 4657.57  28
  -2  -1  -9 85665.8 4961.12   8
   2  -1  -8 73884.3 3998.35  28
  -2  -1  -8 79543.8 4253.36  15
  -2  -1  -8 74161.4 4392.58   8
   2  -1  -7 72086.8 3949.09  28
  -2  -1  -7 76975.1 4255.47  15
  -2  -1  -7 82098.0 4493.58   8
   2  -1  -6 323839. 16344.5  28
  -2  -1  -6 334321. 16715.4  15
  -2  -1  -6 350122. 17005.9   8
   2  -1  -5 128271. 6780.02  28
  -2  -1  -5 143729. 7254.02  15
  -2  -1  -5 144096. 7468.26   8
   2  -1  -4 135607. 6823.20  28
  -2  -1  -4 135674. 7324.32  15
  -2  -1  -4 132519. 7473.11   8
  -2  -1  -3 141046. 7608.35  15
  -2  -1  -3 137030. 7732.88   8
  -2  -1  -2 280722. 13844.2  15
  -2   1  -2 260173. 13117.3  32
  -2  -1  -2 262942. 13914.5   8
  -2  -1  -1 148309. 7980.37  15
  -2   1  -1 139572. 7147.79  32
  -2  -1  -1 143164. 8007.91   8
  -2  -1   0 999999. 47854.7  15
  -2   1   0 949059. 46807.3  32
  -2  -1   0 960125. 46637.3  32
  -2  -1   1 140124. 6917.26  32
  -2   1   1 141436. 7100.96  32
  -2  -1   2 235682. 11524.6  30
  -2   1   2 245216. 11745.5  32
  -2  -1   2 232714. 11541.9  32
   2  -1   3 105389. 5440.49  29
  -2   1   3 110451. 5470.71  32
  -2  -1   3 104451. 5279.94  30
   2  -1   4 94906.4 5038.69  29
  -2  -1   4 98799.0 5526.54  15
  -2  -1   4 103725. 5688.31   8
  -2  -1   4 98106.7 4926.84  30
   2   1   4 95525.9 4872.15  30
  -2   1   4 101270. 5077.84  32
  -2  -1   5 90792.1 4538.68  29
   2  -1   5 97769.4 4839.95  29
  -2  -1   5 102489. 5282.64  15
  -2  -1   5 99064.2 5410.41   8
  -2  -1   5 94093.9 4741.84  30
   2   1   5 88056.0 4747.37  30
   2  -1   6 377590. 18074.1  29
  -2  -1   6 367191. 17792.8  29
  -2  -1   6 384729. 18414.5  15
  -2  -1   6 402020. 18629.5   8
   2   1   6 327871. 18073.1  30
  -2  -1   6 355371. 18007.1  30
   2  -1   7 74200.8 4003.63  29
   2  -1   7 73310.2 3990.36  30
  -2  -1   7 77348.7 4243.18  15
  -2  -1   7 75218.5 4372.38   8
   2   1   7 81110.8 4230.48  30
  -2  -1   7 68723.7 3975.00  30
   2   1   8 68908.8 3661.21  30
  -2  -1   8 53995.2 3444.53  30
  -2   1   8 67927.1 3643.70  38
   2  -1   8 61227.2 3474.60  29
   2  -1   8 61319.8 3463.95  30
  -2  -1   8 68648.9 3813.98   8
  -2  -1   8 62892.6 3617.00  15
   2  -1   9 87800.0 4969.48  29
   2  -1   9 94482.1 4990.31  30
  -2   1   9 92760.3 5096.00  38
   2   1   9 96050.2 5090.31  30
  -2  -1   9 90031.2 5012.20  30
  -2  -1   9 93866.5 5204.50   8
   2  -1  10 442155. 22096.5  29
   2  -1  10 449126. 22095.3  30
  -2   1  10 435536. 22142.3  38
   2   1  10 457445. 22138.0  30
  -2  -1  10 436109. 22132.4  30
  -2  -1  10 437392. 22191.0   8
   2  -1  11 45088.4 2959.89  29
   2  -1  11 49977.9 2996.75  30
  -2   1  11 52390.5 3029.98  38
  -2  -1  11 46298.8 2955.20   8
   2   1  11 47688.1 2933.30  30
  -2  -1  11 50385.6 3009.73  30
   2  -1  12 207317. 10202.1  29
   2  -1  12 217278. 10242.7  30
   2  -1  12 185778. 9549.31  34
  -2  -1  12 208680. 10124.7  30
   2   1  12 190436. 9560.31  34
   2   1  12 219376. 10090.0  30
  -2  -1  12 177226. 9613.89  20
  -2   1  12 208247. 10127.7  38
   2  -1  13 35673.0 2494.91  29
   2  -1  13 40624.6 2582.69  30
   2  -1  13 33368.4 1887.53  34
  -2  -1  13 32200.7 2304.50  30
  -2   1  13 32986.4 1888.34  33
   2   1  13 35613.8 1891.03  34
   2   1  13 36686.4 2322.38  30
  -2   1  13 37360.2 2386.77  38
   2  -1  14 5294.09 913.312  30
   2  -1  14 4105.40 813.123  29
   2   1  14 5036.36 724.317  30
  -2  -1  14 4612.85 727.561  30
  -2   1  14 4320.90 433.829  33
   2  -1  14 5091.82 465.654  34
   2   1  14 4320.67 418.651  34
  -2   1  14 4833.35 431.840  20
  -2   1  14 5804.49 780.620  38
   2  -1  15 38921.9 2889.33  30
   2  -1  15 41564.6 2893.37  29
   2  -1  15 37898.8 2126.43  34
  -2  -1  15 41497.5 2623.29  30
   2   1  15 38231.3 2082.45  34
  -2   1  15 36552.4 2136.13  33
   2   1  15 40048.6 2544.05  30
  -2   1  15 39696.9 2130.96  20
  -2   1  15 37039.0 2587.59  38
   2  -1  16 244046. 12106.9  35
  -2   1  16 242343. 12647.5  38
  -2   1  16 228264. 12045.2  34
   2  -1  16 275278. 13203.1  29
   2  -1  16 256848. 13215.1  30
   2   1  16 254283. 12588.4  30
  -2  -1  16 256056. 12684.6  30
   2   1  16 244395. 12049.3  34
  -2   1  16 249100. 12168.6  33
   2  -1  16 248540. 12111.8  34
  -2   1  16 255704. 12143.3  20
  -2  -1  16 231974. 12034.7  19
   2  -1  17 29005.1 1709.80  35
  -2   1  17 27780.9 1663.79  34
  -2   1  17 28578.4 2132.64  38
   2  -1  17 29051.3 2494.45  29
   2  -1  17 36251.1 2819.20  30
  -2  -1  17 28947.2 1621.34  34
   2  -1  17 32568.7 1739.69  34
  -2  -1  17 29946.7 2186.20  30
   2   1  17 33466.5 2185.80  30
   2   1  17 31092.8 1685.28  34
  -2   1  17 31036.4 1821.19  33
  -2   1  17 30003.9 1780.57  20
  -2  -1  17 29896.8 1671.82  19
   2  -1  18 32705.8 1823.46  35
   2  -1  18 32673.3 2626.45  29
   2  -1  18 33076.7 2754.03  30
   2  -1  18 31899.8 1826.08  34
   2   1  18 31928.9 2256.17  30
  -2  -1  18 31181.4 1729.85  34
   2   1  18 31327.6 1780.95  34
  -2   1  18 29693.1 1767.85  34
  -2  -1  18 32613.7 2325.50  30
  -2   1  18 33563.3 1928.52  33
  -2   1  18 31869.7 1873.60  20
  -2   1  18 35512.0 1867.40  19
  -2  -1  18 33011.5 1789.28  19
   2  -1  19 15363.8 970.693  35
   2  -1  19 14596.9 969.282  34
   2   1  19 16373.4 964.412  34
   2   1  19 12437.5 1315.61  30
  -2  -1  19 13810.9 879.824  34
  -2  -1  19 12163.5 1352.43  30
  -2   1  19 14885.8 933.828  34
  -2   1  19 14696.4 1039.01  33
   2  -1  19 15475.8 1758.35  30
  -2   1  19 14060.6 992.955  20
  -2   1  19 14785.4 974.250  19
  -2  -1  19 14519.2 932.882  19
   2  -1  20 117418. 6036.87  35
   2  -1  20 124236. 6065.05  34
  -2  -1  20 116052. 5957.18  34
  -2   1  20 117002. 6000.39  34
   2   1  20 122199. 6623.22  30
   2   1  20 116955. 6019.37  34
  -2   1  20 115264. 6133.09  33
  -2  -1  20 128924. 6770.20  30
  -2  -1  20 117066. 5953.11  13
   2  -1  20 141926. 7281.64  30
  -2   1  20 123314. 6099.10  20
  -2   1  20 116571. 6050.92  19
  -2  -1  20 122560. 6029.01  19
   2  -1  21 35815.0 1966.28  35
   2  -1  21 37875.8 1991.58  34
  -2  -1  21 35377.2 1889.33  34
  -2  -1  21 32824.3 2518.21  30
  -2   1  21 36552.3 2751.10  30
   2   1  21 35642.7 1954.34  34
   2   1  21 32556.2 2436.85  30
  -2   1  21 34236.1 1922.30  34
  -2  -1  21 34071.8 1876.52  13
   2  -1  21 36349.7 2825.88  30
  -2   1  21 33330.9 1982.95  20
  -2   1  21 35149.4 1967.99  19
  -2  -1  21 35160.8 1945.37  19
   2  -1  22 131125. 7323.95  30
   2  -1  22 123273. 6289.10  35
  -2  -1  22 122356. 6213.56  34
  -2  -1  22 121246. 6994.77  30
  -2   1  22 126663. 6259.01  34
   2   1  22 125291. 6289.69  34
  -2   1  22 127192. 7199.69  30
   2   1  22 124279. 6916.98  30
  -2   1  22 122536. 6291.97  19
   2  -1  23 13713.3 1628.08  30
   2  -1  23 15555.5 995.079  35
   2   1  23 13205.5 1410.64  30
  -2   1  23 15573.5 1655.23  30
  -2  -1  23 15716.5 1551.90  30
  -2   1  23 15384.0 963.138  34
   2   1  23 15518.7 994.013  34
  -2  -1  23 15281.2 929.717  34
  -2   1  23 15305.0 991.730  19
  -2  -1  24 33936.2 2585.80  29
   2  -1  24 37787.5 2954.15  30
   2  -1  24 40222.4 2161.57  35
   2   1  24 40575.9 2793.17  30
  -2   1  24 38822.0 2930.20  30
  -2   1  24 39350.9 2124.07  34
  -2  -1  24 39807.9 2841.71  30
   2   1  24 39605.4 2168.99  34
  -2  -1  24 37604.6 2079.23  34
  -2   1  24 40453.1 2160.22  19
   2  -1  25 5399.36 992.980  30
  -2  -1  25 5903.41 843.984  29
   2   1  25 6457.82 918.866  30
  -2   1  25 5147.04 926.041  30
  -2  -1  25 6404.34 978.736  30
   2  -1  25 6741.89 538.654  35
  -2  -1  25 5572.70 466.857  34
  -2   1  25 5859.43 499.585  34
   2   1  25 6060.09 542.162  34
  -2   1  25 6542.78 534.725  19
  -2  -1  26 96838.8 5629.47  29
   2  -1  26 102910. 6051.30  30
   2  -1  26 103487. 5077.19  35
  -2  -1  26 94724.2 4986.59  34
   2   1  26 100574. 5090.50  34
   2   1  26 97393.8 5767.50  30
  -2  -1  26 95592.1 5838.45  30
  -2   1  26 99865.3 5948.07  30
  -2   1  26 100305. 5035.91  34
  -2   1  26 99169.5 5058.53  19
  -2  -1  27 17547.3 1640.03  29
   2  -1  27 20427.4 1954.50  30
   2  -1  27 21192.5 1224.40  35
  -2  -1  27 17507.3 1128.44  34
  -2  -1  27 22355.2 1942.39  30
  -2   1  27 17877.9 1826.15  30
   2   1  27 23622.4 1886.96  30
  -2   1  27 20613.0 1186.10  34
   2   1  27 20783.9 1237.85  34
  -2   1  27 20103.4 1197.05  19
  -2   1  28 26242.5 1465.05  34
  -2   1  28 26715.8 2240.21  30
   2   1  28 24449.2 2089.48  30
  -2  -1  28 23852.0 1413.10  34
   2   1  28 27736.2 1530.57  34
  -2  -1  28 26649.2 2231.81  30
   2  -1  28 27443.3 1502.75  35
  -2  -1  28 21000.9 1873.34  29
   2  -1  28 26785.7 2300.52  30
   2  -1  29 5754.50 955.618  29
   2  -1  29 5291.71 926.851  30
  -2   1  29 5607.26 929.673  30
  -2  -1  29 4727.77 932.280  30
   2   1  29 5405.37 859.992  30
   2  -1  29 6115.97 503.696  35
  -2   1  29 6496.57 489.518  34
  -2  -1  29 5058.47 423.566  34
   2   1  29 5753.11 510.489  34
  -2  -1  29 5493.91 518.800  10
   2  -1  30 13231.6 1484.59  30
   2  -1  30 13238.0 1453.02  29
   2   1  30 16314.2 1579.31  29
  -2  -1  30 12583.2 1430.29  30
   2   1  30 13582.1 1374.87  30
   2  -1  30 13343.7 869.474  35
  -2   1  30 12266.3 1405.15  30
   2   1  30 15251.3 915.241  34
  -2   1  30 13765.4 847.597  34
  -2  -1  30 11475.8 789.717  34
  -2  -1  30 14673.6 917.115  10
   2   1  31 15734.1 1579.83  29
   2  -1  31 18279.8 1683.78  29
   2  -1  31 14809.0 1581.27  30
  -2  -1  31 14800.8 1539.51  30
   2  -1  31 15804.0 989.505  35
  -2  -1  31 16710.8 1020.05  10
  -2   1  31 15503.8 955.810  34
  -2   1  31 16915.2 1618.33  30
   2   1  31 16386.3 1017.19  34
   2  -1  32 80126.6 4058.29  35
   2   1  32 82904.4 4081.19  35
  -2  -1  32 84631.3 4095.79  10
  -2   1  32 75168.1 4011.69  10
   2   1  32 81706.4 4090.08  34
   2  -1  32 79049.3 4079.79  34
  -2   1  32 75855.2 4015.93  34
   2   1  33 15138.0 909.433  35
   2  -1  33 13863.7 882.445  35
  -2   1  33 13698.4 850.621  10
  -2  -1  33 15863.0 923.818  10
   2  -1  33 15220.9 922.018  34
   2   1  33 14726.3 918.610  34
   2   1  34 39452.2 2014.99  35
   2  -1  34 36642.4 1984.96  35
  -2   1  34 34387.6 1945.20  10
  -2  -1  34 40776.5 2025.54  10
   2  -1  34 39439.8 2024.52  34
  -2   1  35 8310.95 593.016  10
  -2  -1  35 12239.8 685.751  10
   2  -1  35 12082.5 688.578  34
   2  -1  35 9760.28 636.429  35
   2   1  35 11257.1 668.642  35
   2  -1  35 11412.9 681.642  24
   2  -1  35 9994.63 649.027  18
  -2  -1  36 26736.6 1347.92  10
   2  -1  36 22846.1 1310.03  35
   2   1  36 25048.1 1340.96  35
   2  -1  36 25422.5 1353.67  24
   2  -1  36 24438.3 1330.52  18
  -2  -1  37 7507.66 443.923  12
  -2  -1  37 7125.71 438.056  10
   2   1  37 6070.49 429.797  35
   2  -1  37 6973.59 451.463  24
   2  -1  37 5700.61 414.139  18
   2  -1  38 27223.0 1451.03  24
  -2  -1  38 26674.7 1445.12  18
  -2  -1  38 30425.3 1443.91  12
  -2  -1  38 26885.4 1432.80  10
  -2  -1  39 7172.55 420.562  10
  -2  -1  39 7424.79 425.877  12
  -2   1  39 7803.69 438.214  12
   2  -2 -38 5602.22 328.761   1
   2  -2 -37 4489.53 305.206   1
   2  -2 -36 4996.52 332.414   1
   2  -2 -36 3830.95 318.969  23
   2  -2 -35 56612.2 2883.65   1
   2  -2 -34 9543.45 615.757   1
   2  -2 -33 4250.96 370.306   1
   2  -2 -32 7229.21 534.937   1
   2  -2 -31 32213.9 1584.64   1
  -2  -2 -31 24789.8 1493.88  23
   2  -2 -30 21550.3 1205.35   1
  -2  -2 -30 18404.9 1135.21  23
   2  -2 -29 66307.3 3267.88   1
  -2  -2 -29 58212.9 3191.31  23
  -2  -2 -28 17475.2 1071.77  23
  -2  -2 -27 3343.60 372.984  23
  -2  -2 -26 7558.85 602.800  23
  -2  -2 -25 115221. 5870.70  23
  -2  -2 -24 31788.1 1823.46  23
  -2  -2 -23 58657.3 3133.58  23
   2  -2 -23 55977.3 4201.55  31
   2  -2 -22 22340.8 2326.65  31
   2  -2 -21 7308.51 1343.81  31
   2  -2 -20 26450.7 2664.76  31
   2  -2 -20 27296.8 1667.71  27
   2  -2 -19 174042. 10194.7  31
   2  -2 -19 171475. 8694.91  27
   2  -2 -18 32157.2 2870.58  31
   2  -2 -18 29912.1 1786.21  27
   2  -2 -17 55206.1 4004.81  31
   2  -2 -17 54879.9 2963.56  27
   2  -2 -16 46881.3 3458.36  31
   2  -2 -16 47312.9 2564.09  27
   2  -2 -15 96776.6 5426.03  31
   2  -2 -15 88621.1 4426.82  27
   2  -2 -14 49535.1 3226.61  31
   2  -2 -14 46110.7 2420.50  27
  -2  -2 -13 218550. 11110.4  15
   2  -2 -13 204871. 11230.2  31
  -2  -2 -12 9519.46 1133.69  15
  -2  -2 -12 11489.8 759.039  23
   2  -2 -11 17924.8 1015.03  26
   2  -2 -11 15427.7 1360.31  28
  -2  -2 -11 18793.4 1594.99  15
  -2  -2 -11 17567.7 1054.23  23
   2  -2 -10 39707.3 2174.57  26
   2  -2 -10 41028.6 2600.90  28
  -2  -2 -10 45296.7 2880.90  15
  -2  -2 -10 44540.1 2231.54  23
  -2  -2  -9 198584. 10623.9  27
   2  -2  -9 218172. 10930.6  28
   2  -2  -9 211690. 10454.8  26
  -2  -2  -9 231814. 11307.0  15
  -2  -2  -9 217067. 10491.8  23
  -2  -2  -8 44815.5 2589.07  27
   2  -2  -8 45517.0 2790.15  28
  -2  -2  -8 48662.3 3172.50  15
  -2  -2  -8 46167.0 2405.38  17
  -2  -2  -8 49018.3 2442.50  23
  -2  -2  -7 168948. 8754.92  27
   2  -2  -7 174088. 8959.02  28
  -2  -2  -7 185207. 9487.79  15
  -2  -2  -7 174116. 8571.85  23
   2  -2  -6 20080.4 1386.51  28
  -2  -2  -6 18843.7 1056.78  23
  -2  -2  -6 17880.0 1773.60  15
  -2   2  -5 3170.53 471.513  32
  -2  -2  -5 3151.66 928.010  15
   2  -2  -5 3538.75 525.049  28
   2  -2  -4 40233.0 2416.23  28
  -2  -2  -4 43487.6 3116.96  15
  -2   2  -4 39140.9 2344.20  32
   2  -2  -3 229038. 11685.8  28
  -2  -2  -3 258731. 12729.1  15
  -2   2  -3 225406. 11608.4  32
  -2  -2  -2 24687.3 2478.11  15
  -2   2  -2 25578.4 1607.45  32
  -2  -2  -1 105557. 6492.96  15
  -2   2  -1 97863.4 5205.78  32
  -2   2   0 22416.1 1435.85  32
  -2  -2   0 19398.8 2413.81  15
  -2  -2   1 87131.2 4701.65  28
  -2   2   1 88152.8 4672.61  32
  -2  -2   2 45825.0 2542.10  28
  -2   2   2 41292.8 2514.23  32
  -2  -2   3 223907. 11267.0  28
  -2  -2   4 36936.5 2184.74  28
  -2  -2   4 41088.9 3040.66  15
  -2  -2   5 2416.50 367.910  28
  -2  -2   5 2055.68 821.394  15
  -2  -2   6 26771.7 2249.56  15
  -2  -2   6 27182.9 1650.34  28
   2  -2   7 149831. 7829.63  35
  -2   2   7 158571. 7825.24  36
   2  -2   7 159791. 7838.02  24
  -2  -2   7 181618. 8881.99  15
  -2  -2   7 176287. 8085.66  28
  -2  -2   7 161449. 8095.45  30
   2  -2   8 39255.5 2059.11  35
  -2   2   8 38968.8 2043.76  36
   2  -2   8 39419.4 2060.22  24
   2  -2   8 39347.5 2052.79  18
  -2  -2   8 42986.6 2852.95  15
  -2  -2   8 42874.8 2270.79  28
  -2  -2   8 39331.4 2331.16  30
  -2   2   9 176324. 8824.32  36
   2  -2   9 174011. 8837.91  35
  -2  -2   9 178334. 9183.87  30
  -2  -2   9 191962. 9049.26  28
   2  -2   9 175474. 8840.51  24
   2  -2   9 183545. 8838.34  18
  -2  -2   9 200763. 9698.23  15
  -2   2  10 41127.4 2148.97  36
   2  -2  10 40512.7 2166.45  35
  -2  -2  10 43123.4 2547.79  30
  -2  -2  10 41277.0 2283.58  29
  -2  -2  10 44505.3 2356.74  28
   2  -2  10 42574.3 2179.54  34
   2  -2  10 41425.0 2171.30  24
  -2  -2  10 46639.3 2873.34  15
   2  -2  10 39247.4 2155.63  18
   2  -2  11 10204.2 667.351  35
  -2   2  11 10606.1 649.396  36
  -2  -2  11 8263.71 744.886  29
  -2  -2  11 8578.11 933.943  30
  -2  -2  11 9953.24 793.980  28
   2   2  11 10260.0 1010.45  30
   2  -2  11 11710.9 691.270  34
   2  -2  11 11020.8 682.651  24
   2  -2  11 10083.7 660.221  18
  -2  -2  11 10702.8 1145.14  15
  -2   2  12 21218.9 1233.38  36
   2  -2  12 23421.3 1271.50  35
  -2  -2  12 19803.3 1393.41  29
  -2  -2  12 21272.3 1400.90  28
  -2  -2  12 23562.5 1702.20  30
   2  -2  12 22926.2 1273.32  34
   2   2  12 22070.2 1646.58  30
   2  -2  12 22715.1 1271.57  24
  -2  -2  12 22850.2 1763.71  15
  -2  -2  13 166736. 8665.95  29
  -2  -2  13 184653. 9091.03  30
  -2  -2  13 157509. 8581.16  28
   2  -2  13 174978. 8472.33  34
   2   2  13 175949. 8924.28  30
   2  -2  13 170763. 8456.94  35
  -2   2  13 167990. 8433.90  36
  -2   2  13 173366. 9099.75  38
  -2  -2  13 172570. 8992.58  15
  -2  -2  14 47505.5 2854.80  29
  -2  -2  14 51048.0 3223.30  30
   2  -2  14 49548.5 2636.98  34
   2   2  14 48940.6 3033.81  30
   2  -2  14 48349.7 2621.31  35
  -2   2  14 55142.3 3272.09  38
  -2  -2  14 53717.2 3107.27  15
   2  -2  14 46053.1 3329.97  15
  -2   2  15 70815.3 4367.10  38
   2  -2  15 72231.3 3789.56  35
   2   2  15 74981.4 3848.10  34
   2  -2  15 73316.0 3808.70  34
   2   2  15 73983.7 4229.39  30
  -2  -2  15 72626.5 4075.53  29
  -2  -2  15 73309.0 4456.55  30
  -2   2  15 74880.0 3798.26  20
   2  -2  15 64722.7 4413.96  15
   2  -2  16 42805.4 2354.88  35
   2   2  16 45847.9 2404.69  34
  -2   2  16 42040.1 2895.45  38
   2   2  16 45874.7 2809.00  30
  -2  -2  16 44021.4 2331.11  13
  -2  -2  16 41548.9 2345.76  14
  -2  -2  16 39473.3 2639.12  29
   2  -2  16 47803.9 3377.18  30
  -2  -2  16 49218.9 3147.11  30
  -2   2  16 43978.5 2391.25  20
   2  -2  16 35085.6 2860.97  15
   2   2  17 57158.2 3417.59  30
   2   2  17 57831.9 2995.14  34
  -2  -2  17 57893.0 2932.68  13
  -2  -2  17 55275.8 2968.50  14
  -2  -2  17 57689.7 3365.45  29
   2  -2  17 55936.3 4016.46  30
  -2  -2  17 59608.4 3787.66  30
  -2   2  17 53117.3 2990.99  20
   2  -2  17 51822.8 2953.17  35
  -2   2  17 49931.2 3467.94  38
   2   2  18 22239.0 1820.20  30
   2   2  18 25439.4 1484.78  34
  -2  -2  18 24562.2 1411.54  13
  -2  -2  18 25770.7 1490.14  14
  -2  -2  18 24912.0 2134.56  30
   2  -2  18 28885.7 2618.76  30
   2  -2  18 24340.8 2328.92  29
  -2  -2  18 23625.7 1854.22  29
  -2   2  18 21775.8 1447.49  20
  -2   2  18 22755.2 1928.78  38
   2  -2  18 25836.6 1494.06  35
   2   2  19 138081. 7824.36  30
   2   2  19 149414. 7387.43  34
  -2  -2  19 150238. 7320.37  13
  -2  -2  19 143968. 7399.23  14
  -2  -2  19 143626. 7890.60  29
   2  -2  19 156702. 8655.12  29
   2  -2  19 162121. 8967.03  30
  -2  -2  19 152160. 8250.37  30
  -2   2  19 136790. 7353.90  20
   2  -2  19 147602. 7399.54  35
   2   2  20 26536.0 2096.52  30
   2   2  20 29894.8 1720.88  34
  -2  -2  20 30465.4 1655.67  13
  -2  -2  20 29502.3 1735.31  14
  -2  -2  20 27077.0 2145.20  29
   2  -2  20 32090.2 2727.35  29
  -2  -2  20 28767.2 2389.06  30
   2  -2  20 29812.2 2881.37  30
  -2   2  20 29046.2 1699.25  20
  -2   2  20 29858.2 1733.39  19
   2  -2  20 30097.0 1727.66  35
  -2   2  20 28002.6 1727.22  34
   2  -2  21 7136.81 610.899  35
   2   2  21 7149.87 615.830  34
  -2   2  21 7392.39 644.355  34
  -2  -2  21 6998.39 548.156  13
   2  -2  21 6143.44 1251.25  30
  -2  -2  21 5993.61 848.686  29
   2  -2  21 7591.01 1238.54  29
  -2  -2  21 6365.19 1048.47  30
   2   2  21 6486.90 888.329  30
  -2  -2  21 6155.13 622.121  10
  -2   2  21 7287.46 605.309  19
   2  -2  22 22497.3 1336.81  35
   2   2  22 19145.2 1710.69  30
   2   2  22 20901.4 1323.53  34
  -2   2  22 20608.2 1322.83  34
  -2   2  22 21233.3 2133.33  30
  -2  -2  22 22843.9 1271.20  13
  -2  -2  22 20229.4 1732.75  29
   2  -2  22 20700.0 2131.84  29
   2  -2  22 19789.8 2232.86  30
  -2  -2  22 20525.4 1955.48  30
  -2  -2  22 21899.7 1373.66  10
  -2   2  22 21202.6 1309.10  19
   2  -2  23 54010.2 2971.13  35
   2   2  23 52969.5 3497.89  30
  -2   2  23 58460.3 3991.60  30
  -2   2  23 58190.1 3003.51  34
   2   2  23 55176.7 2989.94  34
  -2  -2  23 59521.3 2929.95  13
   2  -2  23 53716.9 3928.88  29
  -2  -2  23 54404.5 3762.04  30
   2  -2  23 59904.1 4210.63  30
  -2  -2  23 54229.3 3025.57  10
  -2   2  23 51863.7 2943.91  19
   2  -2  24 26327.0 1583.92  35
  -2   2  24 26119.8 2418.31  30
   2   2  24 23521.3 2017.90  30
   2   2  24 27622.0 1609.70  34
  -2   2  24 28712.7 1612.55  34
  -2  -2  24 28619.1 1540.24  13
   2  -2  24 29263.6 2512.42  29
  -2  -2  24 27231.0 2304.45  30
  -2  -2  24 26991.4 1632.35  10
  -2   2  24 25889.9 1559.83  19
   2  -2  25 106575. 5450.04  35
  -2   2  25 111799. 6514.53  30
  -2   2  25 106550. 5455.27  34
   2   2  25 106587. 5474.31  34
  -2  -2  25 112836. 5397.92  13
   2  -2  25 108856. 6498.65  29
  -2  -2  25 99967.0 6262.39  30
  -2  -2  25 106044. 5502.28  10
  -2   2  25 101149. 5408.34  19
   2  -2  26 10827.5 751.060  35
   2   2  26 12252.4 797.734  34
  -2   2  26 9729.78 737.100  34
  -2  -2  26 10206.3 692.903  13
   2  -2  26 12069.9 1448.42  29
  -2  -2  26 11947.6 1382.16  30
  -2   2  26 8701.31 1275.55  30
  -2   2  26 8950.07 699.561  19
  -2  -2  26 10655.9 789.931  10
  -2  -2  27 3790.60 424.033  10
   2  -2  27 3330.68 370.620  35
   2   2  27 3154.22 391.554  34
   2  -2  27 3137.74 390.783  34
  -2   2  27 3093.12 372.198  34
  -2  -2  27 3281.35 322.403  13
  -2  -2  27 3784.02 752.428  30
   2  -2  27 3075.27 757.901  29
  -2   2  27 4044.43 837.936  30
   2  -2  27 3648.15 433.181  24
  -2   2  27 2679.83 321.196  19
   2  -2  28 11065.1 796.233  35
   2   2  28 12605.4 845.912  34
   2  -2  28 11907.2 838.652  34
  -2   2  28 13098.6 1473.85  30
  -2   2  28 11250.7 799.239  34
  -2  -2  28 11804.3 751.434  13
   2  -2  28 14843.6 1550.32  29
  -2  -2  28 12567.4 1407.41  30
   2  -2  28 13150.1 873.053  24
  -2  -2  28 12854.8 863.845  10
  -2  -2  29 63205.6 3102.45  10
   2   2  29 60110.5 3083.99  34
   2  -2  29 59273.4 3080.76  34
  -2   2  29 54282.3 3834.76  30
  -2   2  29 56306.0 3032.41  34
   2  -2  29 54902.4 3025.49  35
   2  -2  29 53685.3 3828.99  29
  -2  -2  29 49853.9 3736.92  30
   2  -2  29 60856.6 3097.31  24
  -2  -2  29 57291.8 3018.98  24
   2  -2  29 58869.0 3079.30  18
  -2  -2  30 16076.8 999.951  10
   2  -2  30 15535.1 954.555  35
  -2  -2  30 13869.6 928.175  24
   2  -2  30 16945.3 1018.09  24
   2  -2  30 16284.4 997.847  18
   2   2  30 16384.3 999.377  34
  -2   2  30 15102.1 948.434  34
  -2  -2  31 33985.1 1741.77  10
   2   2  31 32345.9 1726.15  34
  -2   2  31 29906.0 1673.54  34
   2  -2  31 29044.4 1666.42  35
  -2  -2  31 28178.8 1653.22  24
   2  -2  31 32802.9 1738.15  24
   2  -2  31 31609.5 1719.32  18
   2   2  32 5981.83 477.110  34
  -2   2  32 5274.76 428.673  34
   2  -2  32 5597.76 433.155  35
  -2  -2  32 7006.44 504.655  10
  -2  -2  32 5269.85 438.863  12
  -2  -2  32 5470.69 425.356  24
   2  -2  32 6319.45 492.206  24
   2  -2  32 5723.59 468.240  18
  -2   2  33 6193.85 443.813  34
   2   2  33 6220.22 477.278  34
   2  -2  33 5675.73 432.216  35
  -2  -2  33 6198.63 456.980  12
  -2  -2  33 7428.14 507.963  10
   2  -2  33 6516.76 496.125  24
   2  -2  33 6161.60 475.879  18
  -2  -2  33 6234.92 479.030  18
   2   2  34 6990.77 525.661  34
   2  -2  34 7177.09 521.566  18
  -2  -2  34 7498.62 527.759  18
  -2  -2  34 8457.88 547.996  10
   2  -2  34 7818.76 541.324  24
   2  -2  34 8387.96 541.426  10
   2   2  35 43684.2 2306.06  34
  -2  -2  35 44182.9 2301.00  18
   2  -2  35 41728.5 2285.14  18
  -2  -2  35 48522.2 2316.09  10
   2  -2  35 42740.4 2304.73  24
   2  -2  35 47103.8 2303.92  10
   2   2  36 3380.88 286.606  34
  -2  -2  36 3470.66 287.413  18
   2  -2  36 3325.50 275.032  18
  -2  -2  36 3773.32 298.274  10
   2  -2  36 3776.59 300.226  24
   2  -2  36 3784.39 292.427  10
   2   2  37 3476.98 268.965  34
   2   2  37 3486.94 264.738  35
   2  -2  37 3613.42 273.839  24
   2  -2  37 3451.60 264.231  10
  -2  -2  37 3749.37 269.812  10
  -2  -2  38 4158.46 246.116  10
   2  -2  38 2934.92 223.898  10
   2  -3 -36 9729.15 504.648   1
  -2  -3 -36 8183.88 481.432   1
  -2  -3 -35 1387.11 145.639   1
   2  -3 -35 1416.11 161.954   1
  -2   3 -34 7436.65 509.917  37
   2  -3 -34 8875.21 523.541   1
  -2  -3 -34 8859.42 508.579   1
   2  -3 -34 7873.38 523.920  23
  -2   3 -33 2508.21 252.044  37
  -2  -3 -33 2256.63 237.058   1
   2  -3 -33 2928.66 279.433  23
  -2   3 -32 22324.9 1147.73  37
   2  -3 -32 22013.8 1142.97   1
  -2  -3 -32 22266.0 1122.31   1
  -2   3 -31 1168.81 204.148  37
   2  -3 -31 1576.56 231.086   1
  -2  -3 -31 1047.46 175.102  23
   2  -3 -30 332.954 165.423   1
  -2  -3 -30 343.956 149.639  23
   2  -3 -29 6830.65 537.847   1
  -2  -3 -29 6287.92 507.774  23
   2  -3 -28 32794.4 1801.35   1
  -2  -3 -28 30638.6 1756.20  23
   2  -3 -27 3818.39 428.942   1
  -2  -3 -27 4323.71 423.277  23
   2  -3 -26 31054.0 1897.90   1
  -2  -3 -26 35207.9 1893.64  23
   2  -3 -25 6502.51 620.983   1
  -2  -3 -25 7202.84 607.431  23
   2  -3 -24 1196.88 316.311   1
  -2  -3 -24 1012.96 272.016  23
   2  -3 -23 8738.31 784.387   1
  -2  -3 -23 9100.36 746.061  23
  -2  -3 -22 36839.2 2088.88  23
   2  -3 -22 34250.9 2109.97  27
  -2  -3 -21 2481.44 412.356  23
   2  -3 -21 2537.12 465.185  27
  -2  -3 -20 12225.2 954.265  23
   2  -3 -20 12244.1 1005.13  27
  -2  -3 -19 2178.85 426.633  23
   2  -3 -19 2019.59 413.945  27
  -2  -3 -18 27128.6 1750.46  23
   2  -3 -18 26969.4 1701.52  27
  -2  -3 -17 9289.65 814.902  23
   2  -3 -17 8544.59 767.000  27
  -2  -3 -16 67353.4 3790.47  23
   2  -3 -16 72479.3 3765.93  27
  -2  -3 -15 27617.7 2360.00  15
   2  -3 -15 26063.6 2531.01  15
  -2   3 -15 27497.8 2275.92  32
   2  -3 -15 32629.0 1798.07  27
  -2  -3 -15 30444.2 1827.47  23
   2  -3 -15 29539.3 1766.81   1
   2  -3 -14 4435.37 1010.76  15
  -2   3 -14 4445.25 759.696  32
  -2  -3 -14 4707.28 858.815  15
   2  -3 -14 4296.26 471.954  27
  -2  -3 -14 4052.56 484.820  23
   2  -3 -14 3846.37 447.387   1
   2  -3 -13 6828.72 1309.15  15
  -2  -3 -13 9343.79 1226.99  15
  -2  -3 -13 8318.01 664.538  23
   2  -3 -13 7255.05 1121.60  31
  -2   3 -13 6567.08 914.763  32
   2  -3 -13 7506.99 621.693   1
   2  -3 -12 41845.7 3044.13  31
  -2   3 -12 43277.2 2801.26  32
  -2  -3 -12 47280.6 3198.40  15
   2  -3 -12 42150.3 3430.88  15
  -2  -3 -12 45204.5 2365.15  23
   2  -3 -12 39476.2 2286.00   1
   2  -3 -11 14898.3 966.322   1
  -2   3 -11 13146.9 1294.95  32
  -2   3 -11 15924.2 971.329  37
   2  -3 -11 15898.3 975.657  26
  -2  -3 -11 14657.8 1139.32  27
   2  -3 -11 16343.6 1530.28  28
  -2  -3 -11 16191.0 1020.04  23
   2  -3 -11 13831.8 1865.28  15
  -2  -3 -11 17804.7 1746.24  15
   2  -3 -10 63646.2 3426.89   1
   2  -3 -10 58547.1 3606.09  39
  -2   3 -10 68188.9 3444.24  37
   2  -3 -10 65071.9 3442.52  26
  -2  -3 -10 68321.1 3664.39  27
   2  -3 -10 68405.6 4102.01  28
  -2   3 -10 68166.3 3912.37  32
  -2  -3 -10 70326.9 3495.09  23
  -2  -3 -10 70897.2 4457.47  15
  -2  -3 -10 67571.7 3431.58  17
   2  -3 -10 73528.4 4900.85  15
   2  -3  -9 34680.4 2096.17  39
  -2   3  -9 33042.3 1838.16  37
  -2   3  -9 32985.3 2231.15  32
  -2  -3  -9 32464.5 2042.78  27
   2  -3  -9 33056.5 2396.41  28
   2  -3  -9 33191.0 1847.56  26
  -2  -3  -9 36423.1 1892.01  23
  -2  -3  -9 37541.2 2834.37  15
   2  -3  -9 33486.7 3056.53  15
  -2  -3  -9 34061.8 1834.49  17
   2  -3  -8 9572.62 911.363  39
  -2   3  -8 9563.00 633.240  37
  -2   3  -8 9109.66 947.111  32
  -2  -3  -8 8610.66 1313.51  15
  -2  -3  -8 8484.31 792.010  27
   2  -3  -8 10124.1 1068.83  28
   2  -3  -8 9395.08 638.855  26
  -2  -3  -8 10263.2 675.884  23
   2  -3  -8 11516.1 1724.61  15
   2  -3  -8 9395.95 611.220  17
  -2  -3  -8 9039.93 614.774  17
  -2   3  -7 14121.8 874.168  37
   2  -3  -7 14322.1 1206.84  39
  -2   3  -7 15245.3 1231.09  32
  -2  -3  -7 12502.3 1636.28  15
  -2  -3  -7 15153.6 1076.55  27
   2  -3  -7 14390.2 1333.98  28
   2  -3  -7 14730.1 894.069  26
  -2  -3  -7 15471.0 919.428  23
  -2  -3  -7 14386.2 866.490  17
   2  -3  -7 14366.7 857.825  17
  -2   3  -6 181117. 8873.52  32
  -2   3  -6 169179. 8420.41  37
   2  -3  -6 181363. 8784.45  39
  -2  -3  -6 177631. 9777.48  15
  -2  -3  -6 168718. 8413.99  17
   2  -3  -6 168323. 8400.00  17
  -2  -3  -6 161426. 8612.29  27
   2  -3  -6 172854. 9051.23  28
   2  -3  -6 170519. 8437.12  26
  -2   3  -5 47543.0 2837.23  32
   2  -3  -5 51549.6 2859.45  39
  -2   3  -5 47701.4 2455.69  37
  -2  -3  -5 50382.9 2712.51  16
  -2  -3  -5 50182.8 3717.12  15
  -2  -3  -5 47389.5 2450.92  17
   2  -3  -5 45866.9 2430.08  17
  -2  -3  -5 43640.3 2630.66  27
   2  -3  -5 46018.9 2986.10  28
   2  -3  -5 47400.4 2472.94  26
  -2   3  -4 104518. 5595.71  32
  -2   3  -4 100589. 5184.19  37
   2  -3  -4 101329. 5574.66  39
  -2  -3  -4 112293. 5493.71  16
  -2  -3  -4 109600. 6720.54  15
  -2  -3  -4 103162. 5187.73  17
   2  -3  -4 102743. 5170.59  17
  -2  -3  -4 99508.3 5375.28  27
   2  -3  -4 112706. 5847.78  28
   2  -3  -4 106315. 5216.38  26
  -2   3  -3 30215.1 1985.55  32
   2  -3  -3 30328.8 1637.37  25
  -2  -3  -3 27169.4 1777.96  27
   2  -3  -3 29772.1 2132.23  28
   2  -3  -3 33126.8 2108.30  39
  -2   3  -3 29866.0 1618.20  37
  -2  -3  -3 29047.6 2872.05  15
  -2  -3  -3 31237.5 1932.50  16
  -2  -3  -3 30481.3 1621.96  17
   2  -3  -3 31203.0 1611.23  17
  -2   3  -2 16542.5 1260.50  32
  -2  -3  -2 17129.9 2142.55  15
  -2  -3  -2 16945.6 1094.42  27
   2  -3  -2 16774.3 1384.02  28
   2  -3  -2 14561.4 903.517  25
   2  -3  -2 15228.7 1383.73  39
  -2   3  -2 14161.7 884.209  37
  -2  -3  -2 16785.5 1243.51  16
  -2  -3  -2 16460.1 905.239  17
   2  -3  -2 15508.8 885.658  17
   2  -3  -1 23000.6 1702.54  39
   2  -3  -1 18162.4 1119.02  25
   2  -3  -1 21254.0 1641.49  28
  -2  -3  -1 21371.5 1311.44  27
  -2   3  -1 20265.3 1482.64  32
  -2  -3  -1 20374.2 1136.25  23
  -2  -3  -1 19968.7 2465.61  15
  -2  -3  -1 23741.2 1530.46  16
  -2  -3  -1 20251.0 1119.54  17
   2  -3  -1 19225.8 1100.52  17
   2  -3   0 62414.6 3501.37  39
  -2  -3   0 57967.0 2919.13  23
  -2  -3   0 57539.4 4646.90  15
  -2  -3   0 60511.3 3325.60  16
  -2  -3   0 56708.1 2903.16  17
   2  -3   0 55769.6 2887.09  17
  -2  -3   0 57369.2 2938.27  26
   2  -3   0 55895.1 3472.80  28
  -2  -3   0 59570.8 3491.66  28
  -2  -3   0 56271.6 3077.76  27
   2  -3   0 53701.3 2910.03  25
  -2  -3   1 26401.1 1436.11  23
  -2  -3   1 28090.9 1437.51  17
   2  -3   1 25608.4 1410.42  17
  -2  -3   1 26591.4 1594.63  27
  -2  -3   1 26690.7 1454.47  26
   2  -3   1 26689.0 1961.98  28
   2  -3   1 24816.5 1435.52  25
  -2  -3   1 25805.8 1899.64  28
  -2  -3   2 12993.8 810.833  23
  -2  -3   2 13931.0 813.467  17
   2  -3   2 13583.7 796.506  17
  -2  -3   2 14307.8 841.400  26
   2  -3   2 13560.0 825.917  25
  -2  -3   2 12838.0 1198.04  28
  -2   3   3 28550.5 1583.14  36
  -2  -3   3 29201.4 1602.83  23
   2  -3   3 29496.5 1588.75  17
  -2  -3   3 31543.3 1614.09  17
   2  -3   3 30230.1 1622.42  25
  -2  -3   3 31132.2 2087.35  28
   2  -3   4 109181. 5712.49  39
  -2   3   4 106379. 5301.68  36
  -2  -3   4 103006. 5314.80  23
   2  -3   4 100680. 5298.26  17
  -2  -3   4 111675. 6831.70  15
  -2  -3   4 114458. 5618.56  16
  -2  -3   4 108805. 5327.75  17
  -2  -3   4 107871. 5832.90  28
   2  -3   4 108907. 5340.95  25
  -2   3   5 42010.2 2213.10  36
   2  -3   5 42694.9 2576.47  39
  -2  -3   5 41293.5 2229.45  23
  -2  -3   5 40919.8 2200.05  18
   2  -3   5 42533.4 2225.39  17
  -2  -3   5 45788.5 2254.79  17
  -2  -3   5 45339.4 2496.14  16
  -2  -3   5 44503.6 3474.61  15
  -2  -3   5 41012.1 2191.76  25
  -2  -3   5 43152.7 2687.00  28
   2  -3   5 44529.4 2262.26  25
  -2   3   6 163222. 8267.68  36
   2  -3   6 175732. 8634.67  39
  -2  -3   6 173958. 8801.74  28
  -2  -3   6 165823. 8247.35  25
  -2  -3   6 157435. 8283.70  23
  -2  -3   6 165566. 8262.09  18
   2  -3   6 165541. 8291.55  18
  -2  -3   6 177306. 8316.02  17
  -2  -3   6 182591. 8540.28  16
  -2  -3   6 179820. 9694.34  15
  -2  -3   7 12126.0 1583.79  15
   2  -3   7 11349.7 1032.89  39
  -2   3   7 11354.8 712.207  36
  -2  -3   7 11410.1 694.534  25
  -2  -3   7 11833.8 1101.24  28
  -2  -3   7 11371.5 735.817  23
   2  -3   7 11422.4 743.990  24
  -2  -3   7 11397.7 711.233  18
   2  -3   7 12283.6 748.154  18
  -2  -3   8 11021.0 1491.70  15
  -2   3   8 11878.7 731.015  36
   2  -3   8 13545.8 1080.92  39
  -2  -3   8 11375.5 706.861  25
  -2  -3   8 11527.5 1094.27  28
   2  -3   8 10814.6 747.589  24
   2  -3   8 12763.0 766.542  18
   2  -3   8 13132.0 1857.07  15
  -2  -3   8 11644.3 732.369  18
  -2  -3   9 25481.5 1440.78   9
  -2   3   9 24907.7 1418.32  36
   2  -3   9 23773.4 1658.64  39
  -2  -3   9 25564.0 1569.97  13
  -2  -3   9 26374.4 1850.22  28
  -2  -3   9 26024.8 1398.51  25
   2  -3   9 24796.5 1447.64  24
  -2  -3   9 27422.5 1436.66  18
   2  -3   9 26765.9 1455.03  18
  -2  -3   9 25984.3 2293.04  15
   2  -3   9 24237.1 2567.25  15
  -2  -3  10 71832.8 3578.20   9
   2  -3  10 71367.1 3566.88  35
  -2   3  10 67293.6 3544.92  36
   2  -3  10 68926.2 3777.92  39
  -2  -3  10 71408.8 3559.45  10
  -2  -3  10 71538.9 3564.18   4
  -2  -3  10 69345.7 3516.59  25
  -2  -3  10 67290.6 3986.86  28
  -2  -3  10 63308.3 3494.44  24
   2  -3  10 71808.5 3590.90  24
  -2  -3  10 67861.5 3552.82  18
   2  -3  10 71201.3 3583.94  18
  -2  -3  10 71950.7 4538.48  15
   2  -3  10 72581.7 4964.21  15
  -2  -3  11 11120.6 746.647   9
  -2  -3  11 10575.3 765.095   6
  -2   3  11 12159.3 741.374  36
   2  -3  11 12039.1 753.527  35
  -2  -3  11 12118.8 753.352  10
  -2  -3  11 9120.83 1292.46  15
  -2  -3  11 10160.3 720.594   4
  -2  -3  11 10806.9 694.479  25
  -2  -3  11 10925.3 1052.71  28
  -2  -3  11 10016.3 680.466  24
   2  -3  11 11218.3 759.618  24
   2  -3  11 11329.1 761.918  18
   2  -3  11 12464.9 1704.80  15
  -2  -3  11 11445.0 741.362  18
  -2  -3  12 42259.4 2302.21   6
  -2  -3  12 42117.8 2280.03   9
  -2   3  12 44224.0 2267.63  36
   2  -3  12 41199.9 2262.59  35
  -2  -3  12 44056.9 2363.28  13
  -2  -3  12 44566.6 2276.65  10
   2  -3  12 40361.6 2257.56   4
  -2  -3  12 43054.3 2270.56   4
  -2  -3  12 40599.4 2205.18  25
  -2  -3  12 39268.5 2198.85  24
   2  -3  12 42695.5 2294.28  24
   2  -3  12 44440.5 2297.29  18
  -2  -3  12 41879.4 2258.74  18
  -2  -3  12 41409.5 3012.34  15
   2  -3  12 40091.0 3379.18  15
  -2  -3  13 2815.83 339.395  10
  -2  -3  13 3111.88 350.900   6
  -2  -3  13 2703.30 329.942   9
   2  -3  13 3025.75 342.923  35
  -2   3  13 3169.26 340.354  36
  -2  -3  13 2674.17 319.010   4
  -2  -3  13 3431.93 769.291  15
  -2  -3  13 3155.39 392.434  13
   2  -3  13 2935.80 381.184  24
  -2  -3  13 2722.87 298.108  24
  -2  -3  13 2676.53 320.340  18
   2  -3  13 1972.86 321.612  18
   2  -3  13 4506.96 1062.71  15
  -2  -3  14 3571.98 401.550   9
   2  -3  14 4879.77 445.365  35
  -2   3  14 4074.72 493.621  33
  -2  -3  14 3266.17 383.778   4
  -2  -3  14 3813.65 374.804  12
  -2  -3  14 4790.14 474.408  13
  -2  -3  14 4046.53 820.881  15
  -2  -3  14 3380.82 406.436  10
   2  -3  14 4688.01 473.726  24
  -2  -3  14 4159.52 379.571  24
  -2  -3  14 4313.55 428.262  18
   2  -3  14 4371.92 466.936  18
   2  -3  14 5146.41 1092.93  15
  -2  -3  15 25266.8 1492.07   9
  -2   3  15 25951.7 1602.84  33
   2  -3  15 23156.6 1445.46  35
  -2   3  15 23022.5 2040.02  38
  -2  -3  15 27364.4 1513.20  13
  -2  -3  15 25238.9 1486.07  10
  -2  -3  15 23329.7 1403.50  12
  -2  -3  15 26374.8 1482.99  14
  -2  -3  15 23141.6 1398.58  24
   2  -3  15 28438.2 1537.50  24
  -2  -3  15 24432.0 1459.86  18
  -2  -3  15 21057.2 1979.72  15
   2  -3  15 19868.5 2179.31  15
   2  -3  15 25810.8 1514.64  18
  -2   3  16 69659.7 3549.66  33
  -2   3  16 58932.8 4023.14  38
   2  -3  16 62201.4 3348.48  35
  -2  -3  16 60331.6 3287.45  12
  -2  -3  16 67867.4 3382.21  13
  -2  -3  16 67092.1 3382.81  10
  -2  -3  16 62281.0 3355.03  14
  -2  -3  16 61798.8 3289.82  24
   2  -3  16 66139.4 3412.29  24
  -2  -3  16 61916.8 3351.77  18
  -2  -3  16 54735.2 3885.06  15
   2  -3  16 53665.1 4176.39  15
   2  -3  16 65667.0 3419.81  18
  -2   3  17 7063.42 738.026  33
  -2   3  17 6294.10 946.669  38
   2   3  17 6849.88 667.624  34
   2  -3  17 7534.49 619.969  35
  -2  -3  17 7541.70 636.181  10
  -2  -3  17 6388.20 546.094  12
  -2  -3  17 7022.89 601.707  14
  -2  -3  17 7300.99 605.355  13
   2  -3  17 6815.52 649.137  24
  -2  -3  17 6249.63 547.326  24
  -2  -3  17 8062.92 648.578  18
   2  -3  17 5500.46 982.430  15
   2  -3  17 6113.46 642.796  18
  -2   3  18 27848.4 1825.91  33
   2  -3  18 25701.9 1616.84  35
   2   3  18 28790.4 1696.33  34
  -2  -3  18 27431.5 1644.71  14
  -2  -3  18 27350.0 1658.41  10
  -2  -3  18 26017.2 1572.40  12
  -2  -3  18 28877.5 1620.88  13
  -2  -3  18 25955.3 1569.35  24
   2  -3  18 28511.1 1706.18  24
   2  -3  18 29013.3 1715.85  18
  -2  -3  18 27157.5 1647.97  18
  -2  -3  19 1037.91 300.049  10
   2   3  19 1336.37 331.981  34
  -2   3  19 1044.12 415.920  33
   2  -3  19 1283.44 300.961  35
  -2  -3  19 1621.08 302.523  14
  -2  -3  19 1353.81 269.900  13
  -2  -3  19 1361.97 270.836  12
   2  -3  19 1471.88 364.412  24
  -2  -3  19 1430.23 278.434  24
  -2  -3  19 1228.65 303.081  18
   2  -3  19 1528.00 393.982  18
   2   3  20 10725.6 816.675  34
  -2   3  20 10804.2 963.021  33
   2  -3  20 9865.49 784.157  35
  -2  -3  20 9304.99 826.083  10
  -2  -3  20 10966.7 764.555  13
  -2  -3  20 9726.76 807.265  14
  -2  -3  20 10722.2 771.032  12
   2  -3  20 10763.0 895.263  24
  -2   3  20 10724.5 783.890  19
  -2  -3  20 8143.63 718.916  24
   2  -3  20 9784.43 884.569  18
  -2  -3  20 9802.55 822.085  18
  -2  -3  21 1722.53 397.629  10
   2  -3  21 2066.68 353.103  35
  -2  -3  21 2733.93 345.290  13
  -2  -3  21 2616.75 362.213  12
  -2  -3  21 2624.40 386.524  14
   2   3  21 2142.74 394.907  34
  -2   3  21 2338.83 464.400  33
  -2  -3  21 2476.29 361.451  24
   2  -3  21 2463.77 491.454  24
  -2  -3  21 2767.91 422.096  18
   2  -3  21 2141.98 437.255  18
   2  -3  22 29021.7 1784.19  35
  -2   3  22 31928.5 1897.45  34
   2   3  22 32297.5 1851.19  34
  -2   3  22 29570.6 1974.85  33
  -2  -3  22 31540.8 1791.22  12
  -2  -3  22 28935.2 1866.47  10
  -2  -3  22 33001.2 1782.22  13
  -2  -3  22 29380.9 1840.41  14
  -2  -3  22 30724.3 1788.03  24
   2  -3  22 33627.9 1930.06  24
   2  -3  22 32507.5 1926.52  18
  -2  -3  22 32730.3 1873.15  18
   2  -3  23 5127.02 493.247  35
  -2   3  23 4243.99 524.987  34
  -2   3  23 5620.88 637.506  33
   2   3  23 4849.41 516.221  34
   2  -3  23 3697.42 446.414  13
  -2  -3  23 6117.61 487.740  13
  -2  -3  23 4339.61 539.415  10
  -2  -3  23 5249.44 486.102  12
  -2   3  23 5132.34 1084.40  30
  -2  -3  23 4537.87 472.575  24
   2  -3  23 5628.91 592.688  24
  -2  -3  23 5626.09 564.485  18
   2  -3  23 5357.87 586.813  18
  -2  -3  24 678.932 274.621  10
   2  -3  24 111.268 182.777  35
  -2   3  24 176.762 231.982  34
   2   3  24 261.010 223.246  34
  -2  -3  24 351.786 163.443  13
   2  -3  24 151.462 169.531  13
  -2  -3  24 182.351 209.462  12
  -2   3  24 161.637 468.395  30
   2  -3  24 455.265 288.804  24
  -2  -3  24 589.814 221.667  24
  -2  -3  24 477.815 244.836  18
   2  -3  24 573.829 300.429  18
   2  -3  25 8776.81 679.691  35
  -2   3  25 8818.78 724.847  34
   2   3  25 9555.95 729.787  34
  -2  -3  25 9597.33 686.622  12
  -2  -3  25 9289.64 749.772  10
  -2  -3  25 10443.4 684.126  13
  -2   3  25 8182.37 1265.39  30
  -2  -3  25 9673.80 692.074  24
  -2  -3  25 9681.17 745.725  18
   2  -3  25 9437.12 770.181  18
   2  -3  26 30323.6 1748.15  10
   2  -3  26 30382.7 1735.27  35
   2   3  26 32897.6 1809.30  34
  -2   3  26 27241.9 2527.13  30
  -2   3  26 31685.8 1800.51  34
  -2  -3  26 29945.1 1727.60  12
  -2  -3  26 33759.9 1737.65  13
  -2  -3  26 29427.3 1732.36  24
  -2  -3  26 33482.7 1821.43  18
   2  -3  26 31909.9 1831.59  18
   2  -3  27 3783.39 393.592  10
   2  -3  27 4053.89 383.420  35
  -2   3  27 3583.67 416.595  34
   2   3  27 4199.70 428.802  34
  -2  -3  27 4650.45 382.223  13
  -2   3  27 4575.53 887.074  30
  -2  -3  27 3713.63 377.620  24
   2  -3  27 4157.86 450.627  18
  -2  -3  27 4028.67 444.161  18
   2  -3  28 28181.1 1497.11  10
  -2   3  28 26648.6 1515.91  34
   2   3  28 27355.6 1532.14  34
   2  -3  28 23514.8 1449.30  35
  -2  -3  28 28931.5 1464.43  13
  -2  -3  28 24925.6 1460.74  24
   2  -3  28 26253.3 1541.49  18
  -2  -3  28 26707.3 1531.21  18
  -2  -3  29 5825.00 422.585  13
  -2  -3  29 5490.02 478.796  18
   2  -3  29 5316.07 483.072  18
   2  -3  29 5105.48 441.726  10
  -2   3  29 6089.80 480.181  34
   2   3  29 5642.39 484.614  34
  -2   3  30-77.7521 128.655  34
   2   3  30-21.8705 141.641  34
  -2  -3  30-21.5348 151.357  18
   2  -3  30-44.4672 154.787  18
  -2  -3  30 63.4524 96.4716  13
  -2  -3  31 2472.13 280.585  18
   2  -3  31 2167.13 274.166  18
   2   3  31 2678.89 292.706  34
  -2   3  31 2279.39 258.886  34
  -2  -3  32 17618.6 994.457  18
   2  -3  32 16865.4 991.581  18
   2   3  32 17745.3 1002.24  34
  -2   3  32 16553.3 965.940  34
   2   3  33 2646.41 274.911  35
  -2  -3  33 3020.54 276.199  18
   2  -3  33 3415.48 289.202  18
   2   3  33 3350.37 292.106  34
   2   3  34 5620.35 404.427  35
  -2  -3  34 5767.68 399.206  18
   2  -3  34 5912.73 399.277  18
   2   3  34 6337.69 417.261  34
   2   3  35 1017.20 135.184  35
  -2  -4 -30 2054.00 216.790  23
  -2  -4 -29 5797.63 431.447  23
  -2   4 -29 5868.51 409.523  37
  -2  -4 -28 1954.42 246.049  23
  -2   4 -28 1996.56 227.774  37
  -2  -4 -27 586.883 171.123  23
  -2   4 -27 486.296 150.081  37
   2  -4 -26 962.981 235.144  23
  -2  -4 -26 1251.99 234.413  23
   2  -4 -26 1169.83 243.583   1
  -2   4 -26 1313.66 222.828  37
   2  -4 -25 13815.0 891.115  23
  -2  -4 -25 12280.9 852.562  23
   2  -4 -25 11723.6 859.503   1
  -2   4 -25 12675.5 846.315  37
  -2  -4 -24 3992.34 440.130  23
   2  -4 -24 4809.24 472.398  23
   2  -4 -24 3691.73 455.412   1
  -2   4 -24 3315.84 396.590  37
  -2  -4 -23 7107.06 602.723  23
   2  -4 -23 6010.73 588.054   1
  -2   4 -23 5352.04 544.751  37
   2  -4 -22 3758.19 928.866  31
  -2   4 -22 4874.74 509.804  37
  -2  -4 -22 4568.13 509.325  23
   2  -4 -22 4266.79 520.863   1
  -2  -4 -22 3682.60 400.952   1
   2  -4 -21 1949.52 775.944  31
  -2   4 -21 2680.30 407.097  37
   2  -4 -21 3040.41 493.707  27
  -2  -4 -21 3006.40 417.234  23
   2  -4 -21 3019.49 469.088   1
  -2  -4 -21 2247.25 325.509   1
   2  -4 -20 2103.36 832.677  31
  -2   4 -20 2223.53 384.289  37
   2  -4 -20 2303.38 470.344  27
  -2  -4 -20 1998.17 400.028  23
   2  -4 -20 2196.33 462.202   1
  -2  -4 -20 2420.72 340.437   1
   2  -4 -19 20232.7 2372.47  31
  -2   4 -19 18851.9 1327.64  37
   2  -4 -19 24245.3 1505.55  27
  -2  -4 -19 24386.9 1460.58  23
   2  -4 -19 20865.6 1402.50   1
  -2  -4 -19 17944.0 1230.41   1
   2  -4 -18 6039.41 1383.46  31
  -2   4 -18 7285.90 688.215  37
   2  -4 -18 7995.11 779.963  27
  -2  -4 -18 8528.87 786.097  23
   2  -4 -18 7997.07 740.032   1
  -2  -4 -18 7722.88 621.381   1
  -2   4 -17 2259.54 365.928  37
   2  -4 -17 1889.80 436.393  27
  -2  -4 -17 2060.33 412.041  23
   2  -4 -17 1834.15 376.153   1
  -2  -4 -17 1568.56 268.627   1
   2  -4 -16 10943.3 1771.56  31
  -2   4 -16 14849.6 986.113  37
   2  -4 -16 14878.9 1093.40  27
  -2  -4 -16 16099.2 1100.03  23
   2  -4 -16 12898.0 979.331   1
  -2  -4 -16 12124.2 866.117   1
   2  -4 -15 10401.8 823.399   1
  -2   4 -15 10997.8 815.495  37
   2  -4 -15 11097.3 1676.36  31
   2  -4 -15 10875.9 906.019  27
  -2  -4 -15 11419.4 904.579  23
   2  -4 -15 9646.62 888.099  16
   2  -4 -14 6670.27 591.233   1
  -2   4 -14 6723.67 583.949  37
   2  -4 -14 4535.26 1137.69  31
  -2  -4 -14 7460.98 1159.03  15
   2  -4 -14 7091.81 686.672  27
  -2  -4 -14 6353.21 647.082  23
   2  -4 -14 5158.65 691.508  16
   2  -4 -14 6102.31 1312.66  15
  -2  -4 -13 27397.0 1702.94   6
   2  -4 -13 30432.1 1752.44   1
  -2   4 -13 32531.5 1761.12  37
   2  -4 -13 27544.7 2716.17  31
   2  -4 -13 34043.3 1885.91  27
  -2  -4 -13 29617.7 1815.26  23
   2  -4 -13 32286.9 3081.74  15
   2  -4 -13 26846.1 1902.97  16
  -2  -4 -13 31494.2 2683.98  15
   2  -4 -12 7425.08 585.189   1
  -2   4 -12 6366.83 562.393  37
   2  -4 -12 7083.96 1222.83  31
  -2  -4 -12 8224.48 1317.62  15
  -2  -4 -12 6661.93 720.151  27
   2  -4 -12 6505.84 654.198  27
   2  -4 -12 5929.53 1378.91  15
  -2  -4 -12 6160.70 562.691   6
  -2  -4 -11 1749.61 304.023   6
   2  -4 -11 1294.84 271.035   1
  -2   4 -11 2388.96 310.074  37
   2  -4 -11 2000.14 701.686  31
  -2  -4 -11 1645.80 782.862  15
  -2  -4 -11 1647.70 412.380  27
   2  -4 -11 1619.56 304.719  23
   2  -4 -11 1545.62 856.757  15
  -2  -4 -10 3253.74 416.247   6
   2  -4 -10 3740.13 380.875   1
  -2   4 -10 3893.55 396.873  37
   2  -4 -10 3460.92 806.370  31
  -2  -4 -10 4785.32 1044.86  15
  -2  -4 -10 4426.84 596.762  27
   2  -4 -10 3228.01 408.778  26
   2  -4 -10 3255.05 782.900  28
   2  -4 -10 3279.98 393.695  23
   2  -4 -10 3673.68 1185.68  15
  -2  -4  -9 14637.0 1151.22   6
  -2   4  -9 18815.0 1082.09  37
   2  -4  -9 17988.4 1073.33   1
   2  -4  -9 17446.9 1115.22  26
  -2  -4  -9 17106.0 1289.31  27
   2  -4  -9 15638.1 1686.11  28
   2  -4  -9 17100.6 1089.38  23
  -2  -4  -9 17893.4 2045.35  15
   2  -4  -9 18849.9 2429.52  15
  -2  -4  -8 2092.70 369.602   6
  -2  -4  -8 2485.22 310.757   9
  -2   4  -8 2270.87 285.219  37
  -2  -4  -8 2393.44 857.766  15
   2  -4  -8 1640.41 261.689   1
  -2  -4  -8 1769.50 461.277  27
   2  -4  -8 1625.58 297.492  26
   2  -4  -8 1920.95 613.164  28
   2  -4  -8 1866.80 283.768  23
   2  -4  -8 2729.84 1127.81  15
   2  -4  -7 10095.1 1845.45  15
   2  -4  -7 8686.40 609.894  17
  -2  -4  -7 8642.36 1478.72  15
   2  -4  -7 8301.74 601.083   1
  -2  -4  -7 8820.26 830.002  27
   2  -4  -7 7284.85 1116.41  28
   2  -4  -7 8925.32 658.682  26
   2  -4  -7 7921.60 603.748  23
  -2  -4  -7 6778.06 783.655   7
  -2  -4  -7 7699.51 727.542   6
  -2  -4  -7 8089.57 629.687   9
   2  -4  -6 2892.72 308.737  17
   2  -4  -6 2980.09 1288.79  15
  -2  -4  -6 2401.99 896.318  15
   2  -4  -6 2768.91 316.045   1
  -2  -4  -6 3008.17 501.753  27
   2  -4  -6 2970.41 700.224  28
   2  -4  -6 3434.43 374.519  26
   2  -4  -6 2683.81 305.358  23
  -2  -4  -6 2904.59 350.104  23
  -2  -4  -6 2548.68 404.707   6
  -2  -4  -6 2798.44 326.931   9
  -2  -4  -6 2869.26 487.302   7
   2  -4  -5 973.778 193.821  17
   2  -4  -5 851.264 950.008  15
  -2  -4  -5 1885.78 928.058  15
   2  -4  -5 724.958 173.061   1
   2  -4  -5 993.453 241.409  26
  -2  -4  -5 500.121 308.560  27
   2  -4  -5 613.828 377.403  28
   2  -4  -5 747.687 177.615  23
  -2  -4  -5 1208.37 233.195  23
  -2  -4  -5 1077.06 206.108   9
  -2  -4  -5 1156.47 296.341   6
  -2  -4  -5 1178.08 344.065   7
   2  -4  -4 284.559 121.637  17
   2  -4  -4 297.240 1034.70  15
  -2  -4  -4-218.735 895.967  15
   2  -4  -4 168.422 171.565  26
  -2  -4  -4 147.063 299.417  27
   2  -4  -4 122.217 333.819  28
   2  -4  -4 140.170 129.908   1
   2  -4  -4 55.2094 118.100  23
  -2  -4  -4 156.677 167.399  23
  -2  -4  -4-184.741 272.548   7
  -2  -4  -4 120.451 205.253   6
  -2  -4  -4 334.992 149.462   9
  -2  -4  -3 24240.5 2717.06  15
   2  -4  -3 25784.2 1393.52  17
   2  -4  -3 20870.6 3057.09  15
   2  -4  -3 24063.9 1361.12   1
  -2  -4  -3 23164.8 1585.90  27
   2  -4  -3 23802.9 2071.13  28
   2  -4  -3 24857.8 1441.76  26
   2  -4  -3 22583.0 1333.82  23
  -2  -4  -3 26239.3 1430.29  23
  -2  -4  -3 25172.2 1419.59   9
  -2  -4  -3 22794.2 1505.36   6
  -2  -4  -3 25003.3 1742.15   7
  -2  -4  -2 8596.87 893.615  16
   2  -4  -2 7497.55 1956.50  15
   2  -4  -2 8799.00 595.219  17
  -2  -4  -2 7458.74 549.941  10
  -2  -4  -2 7373.97 1542.17  15
   2  -4  -2 7594.81 573.214   1
  -2  -4  -2 9063.47 814.761  27
   2  -4  -2 11372.4 1286.31  28
   2  -4  -2 8121.54 632.562  26
  -2  -4  -2 9072.16 632.638  23
  -2  -4  -2 8520.10 714.307   6
  -2  -4  -2 8225.52 887.994   7
  -2  -4  -2 8978.92 622.703   9
  -2  -4  -1 4665.10 406.727   9
  -2  -4  -1 4093.91 669.061   7
  -2  -4  -1 3782.52 460.861   6
  -2   4  -1 4751.51 390.131  36
  -2  -4  -1 3776.87 348.946  10
  -2  -4  -1 4205.01 468.937  13
  -2  -4  -1 4683.98 1383.14  15
   2  -4  -1 3824.03 364.470   1
  -2  -4  -1 4252.83 569.724  27
   2  -4  -1 4841.42 440.912  26
   2  -4  -1 4667.54 831.034  28
  -2  -4  -1 4214.65 405.066  23
  -2  -4  -1 5298.97 415.790  17
   2  -4  -1 4215.10 379.190  17
  -2  -4  -1 4392.34 682.312  16
   2  -4  -1 5445.00 1781.61  15
  -2  -4   0 1080.68 409.025   7
  -2  -4   0 1283.50 210.397   9
  -2  -4   0 661.491 227.830   6
  -2  -4   0 597.924 177.796  10
  -2   4   0 1276.53 204.770  36
  -2  -4   0 764.472 888.606  15
  -2  -4   0 1184.44 292.943  13
   2  -4   0 1129.15 194.793   1
   2  -4   0 954.717 194.453   4
  -2  -4   0 860.953 310.790  27
  -2  -4   0 1229.54 231.814  23
   2  -4   0 1402.15 250.660  25
  -2  -4   0 1304.04 525.323  16
   2  -4   0 1061.66 1409.67  15
  -2  -4   0 1638.85 226.248  17
   2  -4   0 1362.06 212.364  17
  -2  -4   1 2757.02 308.626  10
  -2  -4   1 3556.20 431.547   6
  -2  -4   1 4251.79 378.963   9
  -2   4   1 3411.94 335.306  36
  -2  -4   1 3292.87 462.607  13
   2  -4   1 2919.26 326.240   4
   2  -4   1 4033.72 390.956  25
  -2  -4   1 3723.67 515.179  27
  -2  -4   1 3428.67 366.452  23
  -2  -4   1 4017.89 364.310  17
   2  -4   1 4194.66 361.165  17
   2  -4   1 4513.85 1717.78  15
  -2  -4   2 8231.97 594.539   9
  -2  -4   2 9134.94 705.589   6
  -2   4   2 7788.32 561.687  36
  -2  -4   2 6523.03 711.724  13
  -2  -4   2 6892.30 531.760  10
  -2  -4   2 7616.99 562.151   4
   2  -4   2 7696.69 564.597   4
   2  -4   2 8640.78 623.121  25
  -2  -4   2 7981.97 749.129  27
  -2  -4   2 9032.05 615.690  23
  -2  -4   2 8157.46 590.723  17
   2  -4   2 8496.37 585.593  17
  -2  -4   3 24556.6 1407.80   9
  -2  -4   3 23745.5 1491.53   6
  -2  -4   3 21956.1 1681.83   7
  -2   4   3 25055.9 1376.34  36
  -2  -4   3 22485.7 1331.94  10
  -2  -4   3 22478.3 1574.55  13
  -2  -4   3 24589.5 1385.09   4
   2  -4   3 24604.0 1378.98   4
  -2  -4   3 21885.5 1494.99  27
   2  -4   3 26814.6 1459.87  25
  -2  -4   3 23077.0 2030.35  28
  -2  -4   3 25181.0 1405.39  23
  -2  -4   3 24832.4 1410.57  17
   2  -4   3 25732.5 1398.45  17
  -2  -4   4 784.597 246.131   6
  -2  -4   4 864.092 195.012   9
  -2  -4   4 584.937 279.006   7
  -2  -4   4 1068.97 197.334  10
  -2   4   4 465.126 165.994  36
  -2  -4   4 835.656 316.972  13
  -2  -4   4 1722.23 1018.83  15
  -2  -4   4 817.846 170.902   4
   2  -4   4 741.437 171.263   4
  -2  -4   4 690.032 211.238  26
  -2  -4   4 930.556 450.647  28
  -2  -4   4 494.893 175.535  23
  -2  -4   4 1322.59 219.858  17
   2  -4   4 555.041 163.496  17
  -2  -4   5 491.873 158.383   9
  -2  -4   5 749.976 162.113  10
  -2  -4   5 780.657 310.419   7
  -2   4   5 322.867 140.442  36
  -2  -4   5-204.994 792.090  15
  -2  -4   5 635.257 263.180  13
  -2  -4   5 853.870 178.875   4
   2  -4   5 544.062 156.718   4
  -2  -4   5 572.631 200.565  26
  -2  -4   5 1379.00 496.885  28
   2  -4   5 396.860 338.968  28
  -2  -4   5 523.332 170.892  23
   2  -4   5 285.425 1136.48  15
   2  -4   5 567.517 172.942  17
  -2  -4   5 417.218 167.258  17
  -2  -4   6 2565.19 308.498   9
  -2  -4   6 2609.17 453.828   7
  -2   4   6 2535.34 295.526  36
  -2  -4   6 1176.63 717.540  15
  -2  -4   6 2679.07 429.005  13
  -2  -4   6 2469.72 279.097  10
   2  -4   6 2175.00 277.077   4
  -2  -4   6 2390.39 279.821   4
   2  -4   6 2027.32 622.580  28
  -2  -4   6 1859.43 280.528  26
  -2  -4   6 1929.29 537.719  28
  -2  -4   6 2767.40 327.865  23
  -2  -4   6 2758.47 322.423  17
   2  -4   6 2097.25 284.989  17
   2  -4   6 2171.02 1206.04  15
  -2   4   7 7346.49 568.937  36
  -2  -4   7 6768.26 693.350  13
  -2  -4   7 9352.39 1504.17  15
  -2  -4   7 8134.31 572.014  10
  -2  -4   7 8748.43 600.795   4
   2  -4   7 7596.64 577.809   4
  -2  -4   7 5703.08 936.567  28
   2  -4   7 8577.90 1209.60  28
  -2  -4   7 7784.34 605.471   9
  -2  -4   7 9131.12 702.046   6
  -2  -4   7 6166.22 718.080   7
   2  -4   7 7862.97 596.801  17
  -2  -4   7 8760.23 630.070  17
   2  -4   7 4644.75 1500.99  15
  -2   4   8 2580.58 329.099  36
  -2  -4   8 3409.02 344.985  10
  -2  -4   8 3219.63 446.066  13
  -2  -4   8 2870.52 896.483  15
   2  -4   8 3549.91 354.341   4
  -2  -4   8 3811.02 363.412   4
   2  -4   8 2983.00 754.365  28
  -2  -4   8 2635.70 610.043  28
  -2  -4   8 2997.31 403.916   6
  -2  -4   8 2869.84 354.251   9
   2  -4   8 2930.25 346.128  17
  -2  -4   8 3594.74 384.825  17
   2  -4   8 3687.61 1309.05  15
  -2   4   9 15262.5 993.747  36
  -2  -4   9 15043.6 1116.98  13
  -2  -4   9 15697.1 986.667  10
   2  -4   9 15851.3 1004.18   4
  -2  -4   9 17321.3 1026.23   4
   2  -4   9 13908.9 1668.74  28
  -2  -4   9 17411.6 1124.82   6
  -2  -4   9 15544.0 1030.01   9
   2  -4   9 15643.9 1023.44  17
  -2  -4   9 17689.2 1060.53  17
  -2  -4   9 15812.4 1913.94  15
   2  -4   9 18797.0 2419.82  15
  -2  -4  10 2451.30 310.481   4
   2  -4  10 2486.30 322.399   4
  -2   4  10 2668.65 333.020  36
  -2  -4  10 3633.15 950.916  15
  -2  -4  10 2073.72 383.490  13
   2  -4  10 1802.45 1050.14  15
  -2  -4  10 2968.50 366.269  17
   2  -4  10 2636.25 345.517  17
  -2  -4  10 2291.16 311.850  10
  -2  -4  10 2267.18 368.227   6
  -2  -4  11 784.601 268.171   6
  -2  -4  11 838.660 217.662  10
   2  -4  11 1287.36 232.391   4
  -2  -4  11 1908.92 271.058   4
  -2   4  11 999.774 250.248  36
  -2  -4  11 794.411 670.821  15
  -2  -4  11 1106.95 287.932  13
  -2  -4  11 1067.61 203.115  25
  -2  -4  11 1510.01 268.878  18
   2  -4  11 1514.12 911.873  15
   2  -4  11 1068.66 245.577  17
  -2  -4  11 925.590 232.874  17
  -2   4  12 12181.5 931.516  33
  -2  -4  12 10017.6 747.749  10
  -2  -4  12 10698.2 1460.96  15
  -2  -4  12 10046.0 722.828  25
  -2  -4  12 11223.5 780.104  18
   2  -4  12 9999.51 781.821  17
  -2  -4  12 10862.0 805.032  17
   2  -4  12 7475.65 1507.22  15
   2  -4  12 10288.8 759.599   4
  -2  -4  12 11406.5 777.379   4
  -2   4  13 28056.9 1807.32  33
  -2  -4  13 28062.3 1619.29  10
   2  -4  13 28923.0 1716.85  25
  -2  -4  13 30058.1 1653.25  18
   2  -4  13 30075.5 1710.25  18
   2  -4  13 25753.1 1658.34  17
  -2  -4  13 27214.4 1690.74  17
  -2  -4  13 27079.9 2482.40  15
   2  -4  13 26826.9 2824.61  15
  -2  -4  13 28117.6 1651.18   4
  -2   4  14 9085.72 856.054  33
  -2  -4  14 9110.94 705.263  10
  -2  -4  14 7542.36 1213.46  15
   2  -4  14 10189.6 790.838  25
   2  -4  14 7653.80 838.524  16
  -2  -4  14 10528.7 738.751  18
   2  -4  14 7012.39 1416.88  15
   2  -4  14 10470.9 794.004  18
   2  -4  14 8993.41 737.993  17
  -2  -4  14 9449.47 761.638  17
  -2  -4  14 8468.70 699.314   4
  -2   4  15 4763.85 921.395  38
  -2   4  15 6181.74 697.163  33
  -2  -4  15 5254.27 997.462  15
  -2  -4  15 4993.74 494.151  10
  -2  -4  15 4983.67 523.028  13
  -2  -4  15 5849.98 524.354  14
   2  -4  15 5251.41 563.625  25
  -2  -4  15 4578.54 517.703   9
  -2  -4  15 5417.89 524.559  18
   2  -4  15 5443.53 576.809  18
  -2  -4  15 5229.95 548.128  17
   2  -4  15 4015.96 589.997  16
   2  -4  15 4827.51 1106.44  15
  -2   4  16 16604.7 1232.42  33
  -2  -4  16 14562.0 978.526  10
  -2  -4  16 15549.3 1022.06  13
  -2  -4  16 15387.4 1008.33  14
   2  -4  16 14393.0 1058.81  25
  -2   4  16 11262.5 1462.02  38
   2  -4  16 10507.3 993.389  16
  -2  -4  16 14891.0 1003.02  18
   2  -4  16 16561.0 1095.48  18
   2  -4  16 12207.4 1678.48  15
  -2  -4  17 2093.67 333.200  14
  -2  -4  17 2258.45 358.622  13
   2   4  17 2317.28 436.587  34
  -2   4  17 2275.59 508.159  33
  -2  -4  17 2662.76 365.107  10
  -2  -4  17 1910.14 354.932  18
   2  -4  17 2908.10 474.887  18
  -2  -4  18 6421.44 567.267  13
  -2  -4  18 6032.96 579.733  10
  -2  -4  18 5711.72 572.812  14
  -2   4  18 5551.73 735.361  33
   2   4  18 5488.64 612.948  34
  -2  -4  18 6587.83 613.820  18
   2  -4  18 5949.45 652.847  18
  -2  -4  19 21427.5 1335.65  18
   2  -4  19 21638.5 1405.70  18
   2   4  19 19672.3 1334.15  34
  -2   4  19 19921.1 1469.99  33
  -2  -4  19 21053.7 1273.62  13
  -2  -4  19 18402.7 1285.27  14
  -2  -4  19 19604.3 1287.59  10
   2   4  20 3094.53 461.044  34
  -2   4  20 4059.21 575.277  33
  -2  -4  20 3596.85 468.096  18
   2  -4  20 4112.92 561.363  18
  -2  -4  20 3306.12 452.171  10
  -2  -4  20 3624.07 408.469  13
  -2  -4  20 2934.74 422.302  14
   2   4  21 2921.53 411.424  34
  -2   4  21 2919.54 491.537  33
  -2  -4  21 2436.32 385.874  18
   2  -4  21 2985.00 501.147  18
  -2  -4  21 3114.82 421.199  10
  -2  -4  21 2576.36 355.852  13
  -2  -4  21 2136.73 361.378  14
  -2   4  22 3327.18 481.001  34
   2   4  22 3364.12 434.186  34
  -2  -4  22 3423.31 417.161  14
   2  -4  22 2728.24 385.551  13
  -2  -4  22 3492.72 387.095  13
  -2  -4  22 3366.75 448.960  18
   2  -4  22 3532.45 497.894  18
  -2  -4  22 3668.11 441.699  10
   2  -4  23 5783.93 580.694  25
  -2  -4  23 6514.41 593.726  10
   2  -4  23 6880.16 575.093  13
  -2  -4  23 7457.99 555.590  13
  -2  -4  23 7358.65 620.622  18
   2  -4  23 6352.63 636.119  18
   2   4  23 7437.53 620.166  34
  -2   4  23 6212.69 625.859  34
   2  -4  24 4055.40 441.162  25
  -2  -4  24 4247.07 397.573  13
  -2  -4  24 3630.72 420.256  10
   2  -4  24 3641.90 396.923  13
  -2  -4  24 4067.51 444.201  18
   2  -4  24 4146.62 482.249  18
  -2   4  24 3875.48 465.271  34
   2   4  24 3566.93 412.964  34
   2  -4  25 11354.7 815.611  25
   2  -4  25 11568.3 759.754  13
  -2  -4  25 11410.9 802.723  10
  -2  -4  25 12891.7 776.349  13
  -2  -4  25 11974.3 824.341  18
   2  -4  25 12063.2 846.938  18
  -2   4  25 12660.6 846.626  34
   2   4  25 10728.4 802.113  34
  -2   4  26 329.727 192.779  34
   2   4  26 507.894 204.994  34
  -2  -4  26 873.574 179.285  13
   2  -4  26 438.768 151.276  13
   2  -4  26 405.976 183.280  25
  -2  -4  26 705.396 220.374  18
   2  -4  26 529.577 229.929  18
  -2  -4  26 478.221 181.771  17
  -2  -4  26 292.721 188.567  10
  -2   4  27 352.593 173.455  34
   2   4  27 480.255 178.180  34
  -2  -4  27 341.457 132.144  13
   2  -4  27 238.326 126.735  13
   2  -4  27 245.364 141.963  25
  -2  -4  27 536.982 187.200  18
   2  -4  27 371.587 186.816  18
  -2  -4  27 124.115 140.497  17
  -2  -4  27 218.852 170.265  10
  -2   4  28 2251.04 259.062  34
   2   4  28 2305.19 269.563  34
  -2  -4  28 2075.35 223.662  13
   2  -4  28 2071.73 250.655  25
  -2  -4  28 2170.28 258.568  18
   2  -4  28 1936.94 249.517  17
  -2  -4  28 1794.04 244.178  17
  -2  -4  28 2342.42 263.865  10
   2  -4  29 5739.81 436.828  25
  -2  -4  29 6777.11 412.987  13
  -2  -4  29 6202.34 435.156  10
  -2  -4  29 5301.30 430.275  18
   2  -4  29 5134.62 429.506  17
  -2  -4  29 6492.21 463.572  17
  -2   4  29 6251.38 446.724  34
   2   4  29 6428.27 458.445  34
  -2   4  30 1434.36 183.462  34
   2   4  30 1562.23 196.528  34
  -2  -4  30 1448.45 182.481  18
  -2  -4  30 1474.83 181.490  17
   2  -4  30 1087.38 157.874  17
  -2  -4  30 1313.33 140.296  13
   2  -4  30 868.814 149.464  25
  -2  -4  30 1600.31 189.385  10
   2   4  31 5778.56 372.370  34
  -2  -4  31 5230.42 344.188  10
  -2  -4  32 2014.75 177.428  10
   2  -5 -27 69.2585 82.2385   1
  -2  -5 -26 843.872 143.373  23
   2  -5 -26 682.561 142.434  23
   2  -5 -26 641.177 137.598   1
   2  -5 -25 204.273 129.076  23
  -2  -5 -25 307.835 129.670  23
   2  -5 -25 342.555 142.268   1
   2  -5 -24 215.352 138.224  23
  -2  -5 -24 434.992 153.274  23
   2  -5 -24 193.408 137.483   1
   2  -5 -23 22.1800 135.630  23
  -2  -5 -23 180.965 153.049  23
   2  -5 -23 326.104 161.231   1
   2  -5 -22 1143.05 237.810  23
  -2  -5 -22 1790.55 278.081  23
   2  -5 -22 1446.38 261.082   1
   2  -5 -21 55.0416 178.248  23
  -2  -5 -21-57.4534 173.212  23
   2  -5 -21 211.262 194.177   1
   2  -5 -20 483.560 199.787  23
  -2  -5 -20 606.511 248.068  23
   2  -5 -20 651.588 244.174   1
  -2  -5 -19 2712.01 387.307  23
   2  -5 -19 1844.72 333.531  23
   2  -5 -19 1884.41 330.129   1
   2  -5 -19 2015.74 405.463  27
   2  -5 -18 466.538 243.950  23
   2  -5 -18 542.045 241.855   1
   2  -5 -18 670.366 314.635  27
  -2  -5 -17 966.990 186.960   9
   2  -5 -17 930.575 280.992  23
   2  -5 -17 1231.55 280.633   1
   2  -5 -17 1249.40 418.101  27
  -2  -5 -16 277.361 145.014   9
   2  -5 -16 505.596 331.494  27
   2  -5 -16 599.356 259.778  23
   2  -5 -16 279.476 214.769   1
   2  -5 -15 1660.95 692.465  31
  -2  -5 -15 884.498 212.299   9
   2  -5 -15 1680.69 418.318  27
   2  -5 -15 1135.34 275.956  23
   2  -5 -15 1579.58 303.188   1
   2  -5 -14 413.778 217.409   1
   2  -5 -14-201.370 583.266  31
   2  -5 -14-38.6920 289.423  16
   2  -5 -14 406.745 360.765  27
   2  -5 -14 133.228 200.922  23
  -2  -5 -14 95.9614 138.265   9
   2  -5 -13 458.751 207.475   1
   2  -5 -13 215.205 335.217  16
   2  -5 -13-403.200 550.626  31
   2  -5 -13 151.873 289.383  27
   2  -5 -13 255.638 193.015  23
  -2  -5 -13 204.786 180.861   9
   2  -5 -12 3052.79 382.651   1
   2  -5 -12 4074.94 570.143  16
   2  -5 -12 2137.70 854.303  31
   2  -5 -12 2933.94 900.170  15
  -2  -5 -12 2557.51 803.114  15
   2  -5 -12 3989.66 549.248  27
  -2  -5 -12 3942.01 470.453  23
   2  -5 -12 2771.09 378.632  23
  -2  -5 -12 3608.56 415.009   9
  -2  -5 -12 3333.23 384.301   6
   2  -5 -11 4692.83 447.097   1
   2  -5 -11 2967.61 1023.15  15
   2  -5 -11 4108.51 613.223  16
   2  -5 -11 4113.36 1025.57  31
  -2  -5 -11 3395.06 949.308  15
   2  -5 -11 4236.33 581.372  27
  -2  -5 -11 5783.38 533.432  23
   2  -5 -11 3696.64 428.020  23
  -2  -5 -11 3969.10 443.518   6
  -2  -5 -11 3956.51 452.765   9
   2  -5 -10-25.9939 172.261   1
   2  -5 -10 452.625 787.822  15
   2  -5 -10 110.275 412.421  16
   2  -5 -10 179.521 458.631  31
  -2  -5 -10 179.369 519.578  15
   2  -5 -10 96.9624 303.456  27
  -2  -5 -10 35.6885 204.019  23
   2  -5 -10 218.142 180.682  23
  -2  -5 -10 289.206 203.689   6
  -2  -5 -10 582.781 209.496   9
   2  -5  -9 833.095 224.343   1
   2  -5  -9 1447.69 903.077  15
   2  -5  -9 354.614 440.124  16
   2  -5  -9 686.281 550.836  31
  -2  -5  -9 377.406 605.562  15
   2  -5  -9 1285.27 364.097  27
   2  -5  -9 513.254 196.085  23
  -2  -5  -9 761.944 248.982  23
  -2  -5  -9 830.850 253.685   6
  -2  -5  -9 1600.46 283.755   9
   2  -5  -8 416.955 173.662   1
   2  -5  -8 631.864 492.265  16
   2  -5  -8 1026.15 959.452  15
   2  -5  -8 985.731 673.251  31
  -2  -5  -8 595.725 691.543  15
  -2  -5  -8 102.248 300.960  27
   2  -5  -8 482.800 177.204  23
  -2  -5  -8 605.597 248.262  23
  -2  -5  -8 337.618 173.751   9
  -2  -5  -8 432.618 244.444   6
   2  -5  -7 4338.53 415.365   1
   2  -5  -7 5378.17 807.772  16
   2  -5  -7 2962.67 1291.14  15
   2  -5  -7 4398.67 982.061  31
  -2  -5  -7 4800.04 1210.45  15
   2  -5  -7 4907.29 528.248  26
  -2  -5  -7 4119.72 581.703  27
   2  -5  -7 4075.58 928.329  28
  -2  -5  -7 4452.90 472.452  23
   2  -5  -7 4343.50 402.708  23
  -2  -5  -7 4516.70 550.908   6
  -2  -5  -7 3780.18 442.265   9
   2  -5  -6 1582.50 251.058   1
   2  -5  -6 847.604 865.450  15
   2  -5  -6 1468.22 581.009  16
   2  -5  -6 1351.66 584.249  31
  -2  -5  -6 657.607 705.419  15
  -2  -5  -6 1325.07 399.333  27
   2  -5  -6 1587.98 341.908  26
   2  -5  -6 971.513 523.240  28
   2  -5  -6 1359.04 223.495  23
  -2  -5  -6 1853.75 307.372  23
  -2  -5  -6 1457.37 265.371   9
  -2  -5  -6 1425.44 360.106   6
   2  -5  -5 2072.55 1214.06  15
   2  -5  -5 1101.42 595.804  16
   2  -5  -5 938.640 217.366  17
   2  -5  -5 1008.21 576.110  31
  -2  -5  -5 1603.23 858.247  15
  -2  -5  -5 1825.35 424.864  27
   2  -5  -5 1128.20 304.699  26
   2  -5  -5 2254.04 697.440  28
  -2  -5  -5 968.482 255.079  23
  -2  -5  -5 1311.86 263.385   9
  -2  -5  -5 1184.07 349.288   6
   2  -5  -4 627.570 187.967  17
   2  -5  -4 617.641 989.508  15
   2  -5  -4 459.565 549.613  16
  -2  -5  -4 958.165 732.220  15
   2  -5  -4 650.450 193.944   4
   2  -5  -4 1443.74 580.619  28
  -2  -5  -4 649.316 328.265  27
   2  -5  -4 1046.43 304.065  26
  -2  -5  -4 796.950 230.209  23
  -2  -5  -4 743.448 305.488   6
  -2  -5  -4 846.543 213.994   9
   2  -5  -3 2570.42 1353.33  15
   2  -5  -3 974.497 230.522  17
   2  -5  -3 1275.51 660.070  16
  -2  -5  -3 2238.12 991.549  15
   2  -5  -3 944.238 229.793   4
  -2  -5  -3 1485.63 250.249   4
  -2  -5  -3 1565.60 404.421  27
  -2  -5  -3 1358.24 265.263  23
  -2  -5  -3 891.292 321.252   6
  -2  -5  -3 1164.57 250.562   9
   2  -5  -2 333.984 969.840  15
   2  -5  -2 1618.07 272.077  17
   2  -5  -2 1989.20 719.111  16
  -2  -5  -2 1799.60 1025.73  15
   2  -5  -2 1154.05 254.235   4
  -2  -5  -2 1570.45 259.226   4
  -2  -5  -2 1340.45 383.277  27
  -2  -5  -2 1489.03 281.570  23
  -2  -5  -2 1643.04 273.015   9
  -2  -5  -2 1135.25 337.768   6
  -2  -5  -1 1523.48 368.359   6
  -2  -5  -1 838.260 228.980   9
  -2   5  -1 410.798 198.581  36
  -2  -5  -1 264.294 884.506  15
  -2  -5  -1 970.319 245.387  13
  -2  -5  -1 971.693 209.081   4
   2  -5  -1 321.148 187.427   4
  -2  -5  -1 740.975 369.935  27
  -2  -5  -1 1091.30 247.152  23
   2  -5  -1 323.206 195.630  17
   2  -5  -1-345.114 1154.65  15
  -2  -5   0 3206.63 479.689   6
  -2  -5   0 3687.75 403.838   9
  -2   5   0 2812.81 346.589  36
  -2  -5   0 2591.74 399.484  13
  -2  -5   0 3794.94 1210.26  15
   2  -5   0 3447.86 382.604   4
  -2  -5   0 3947.42 386.419   4
  -2  -5   0 3580.21 547.369  27
  -2  -5   0 4376.52 422.941  23
   2  -5   0 3009.01 367.090  17
   2  -5   0 3902.54 1578.02  15
  -2  -5   1 1204.03 241.579   9
  -2  -5   1 542.047 266.974   6
  -2   5   1 297.950 217.111  36
  -2  -5   1 959.722 278.050  13
   2  -5   1 535.464 207.858   4
  -2  -5   1 1203.53 222.107   4
  -2  -5   1 699.656 310.519  27
   2  -5   1 966.414 516.819  28
  -2  -5   1 810.762 224.382  23
   2  -5   1 274.024 188.171  17
   2  -5   1 349.903 1170.68  15
  -2  -5   2 2068.42 300.330   9
  -2  -5   2 1650.59 367.975   6
  -2   5   2 1227.81 241.505  36
  -2  -5   2 1668.96 347.276  13
   2  -5   2 1534.15 282.974   4
  -2  -5   2 1979.66 287.273   4
   2  -5   2 1362.18 311.064  26
   2  -5   2 1780.35 648.744  28
  -2  -5   2 1521.71 270.956  23
   2  -5   2 1381.23 264.229  17
  -2  -5   3 1460.75 287.578   9
  -2  -5   3 1223.06 207.586  10
  -2  -5   3 1338.71 336.583   6
  -2   5   3 1266.37 241.766  36
  -2  -5   3 1693.02 385.000  13
  -2  -5   3 1472.34 265.814   4
   2  -5   3 1466.61 269.615   4
   2  -5   3 1847.40 335.831  26
   2  -5   3 1789.85 705.810  28
  -2  -5   3 1367.05 275.123  23
   2  -5   3 1340.82 249.163  17
  -2  -5   4 971.264 200.175  10
  -2  -5   4 1547.89 278.784   9
  -2  -5   4 801.817 303.230   6
  -2   5   4 1127.31 223.552  36
  -2  -5   4 932.430 813.145  15
  -2  -5   4 1248.49 345.738  13
  -2  -5   4 1283.21 255.765   4
   2  -5   4 959.206 218.157   4
   2  -5   4 966.395 282.931  26
   2  -5   4 1146.81 572.719  28
  -2  -5   4 1014.35 235.216  23
   2  -5   4 1196.85 229.658  17
   2  -5   4 311.979 853.543  15
   2  -5   5 884.927 200.300   4
  -2  -5   5 764.675 218.138   4
  -2  -5   5 891.610 776.955  15
  -2  -5   5 1068.47 306.588  13
  -2   5   5 887.683 216.716  36
   2  -5   5 524.633 243.352  26
   2  -5   5 496.151 453.407  28
  -2  -5   5 1259.07 333.285   6
  -2  -5   5 853.994 229.668   9
  -2  -5   5 652.431 169.085  10
   2  -5   5 893.484 1076.61  15
   2  -5   5 583.730 551.665  16
   2  -5   5 1158.38 227.282  17
   2  -5   6 1122.06 231.454   4
  -2   5   6 1090.57 233.505  36
  -2  -5   6 939.412 315.965  13
  -2  -5   6 636.778 582.159  15
   2  -5   6 1249.13 325.261  26
   2  -5   6 334.196 459.525  28
  -2  -5   6 1288.66 220.655  10
  -2  -5   6 1151.17 325.163   6
  -2  -5   6 1153.48 279.507   9
   2  -5   6 283.254 822.193  15
   2  -5   6 690.794 564.584  16
   2  -5   6 1417.38 252.819  17
   2  -5   7 5573.15 494.799   4
  -2   5   7 4338.73 445.700  36
  -2   5   7 5487.88 603.563  33
  -2  -5   7 5279.49 432.300  10
  -2  -5   7 3443.92 1007.84  15
  -2  -5   7 4982.81 571.458  13
   2  -5   7 5622.20 565.555  26
   2  -5   7 4729.41 1008.33  28
   2  -5   7 2683.10 1265.99  15
   2  -5   7 4717.96 771.832  16
   2  -5   7 4758.76 469.137  17
  -2  -5   7 5548.91 536.861   9
   2  -5   8 318.907 168.486   4
   2  -5   8 248.257 505.068  16
   2  -5   8 254.776 777.943  15
   2  -5   8 153.903 146.214  17
  -2   5   8 375.800 287.148  33
  -2  -5   8-39.8484 243.691  13
  -2  -5   8 192.837 558.678  15
   2  -5   8 386.246 258.707  26
   2  -5   8 512.550 495.019  28
   2  -5   8 485.480 242.237  25
  -2  -5   8 289.657 210.173   9
  -2  -5   8 356.787 157.537  10
   2  -5   9 1210.18 264.545   4
   2  -5   9 2403.16 1089.40  15
   2  -5   9 521.750 454.087  16
   2  -5   9 1168.71 241.622  17
  -2   5   9 1022.36 332.913  33
  -2  -5   9 1653.60 754.285  15
  -2  -5   9 1274.43 313.852  13
   2  -5   9 936.393 286.428  26
   2  -5   9 1208.31 647.430  28
   2  -5   9 1209.61 284.888  25
  -2  -5   9 621.846 182.870  10
  -2  -5   9 1555.07 276.937   9
   2  -5  10 210.562 174.745   4
   2  -5  10 223.888 683.652  15
   2  -5  10 54.0909 408.075  16
   2  -5  10 454.271 193.561  17
  -2   5  10 202.037 271.825  33
  -2  -5  10 631.797 282.828  13
  -2  -5  10 349.945 585.320  15
   2  -5  10 157.505 228.475  26
   2  -5  10-174.418 476.460  28
   2  -5  10 421.380 242.875  25
  -2  -5  10 450.481 202.223   9
  -2  -5  10 153.463 150.247  10
   2  -5  11 3728.96 408.566   4
   2  -5  11 2287.68 955.837  15
   2  -5  11 3431.98 402.856  17
   2  -5  11 3099.88 559.749  16
  -2   5  11 3302.18 519.618  33
  -2  -5  11 3520.40 364.202  10
  -2  -5  11 3926.97 462.871  13
  -2  -5  11 2997.16 866.198  15
   2  -5  11 2283.80 718.156  28
   2  -5  11 3255.57 449.152  25
  -2  -5  11 3153.98 426.039   9
   2  -5  12 3625.22 417.298  17
   2  -5  12 2710.80 502.352  16
   2  -5  12 2511.03 965.501  15
  -2   5  12 3103.40 512.738  33
  -2  -5  12 2364.34 779.085  15
  -2  -5  12 3525.74 367.482  10
  -2  -5  12 3955.39 462.939  13
   2  -5  12 3179.00 834.695  28
   2  -5  12 3486.11 448.426  25
  -2  -5  12 4176.31 477.307   9
   2  -5  13 210.148 334.644  16
   2  -5  13 209.924 197.023  17
  -2   5  13 56.3576 282.766  33
  -2  -5  13 321.156 172.706  14
  -2  -5  13-296.210 535.027  15
  -2  -5  13 400.347 251.612  13
   2  -5  13-354.422 513.282  15
   2  -5  13-176.711 451.401  28
   2  -5  13 157.951 225.594  25
  -2  -5  13 69.9738 157.710  10
   2  -5  14-152.767 306.332  16
   2  -5  14 71.4598 179.333  17
  -2   5  14 171.223 311.755  33
  -2  -5  14 32.2339 164.771  14
   2  -5  14 175.694 415.524  28
   2  -5  14 238.268 233.276  25
  -2  -5  14 308.118 185.984  10
   2  -5  15 615.836 222.759  17
  -2  -5  15 1109.40 273.078  17
   2  -5  15 648.332 301.513  16
  -2   5  15 838.911 319.139  33
  -2  -5  15 1099.40 255.468  14
   2  -5  15 514.326 498.476  28
   2  -5  15 1588.27 347.777  25
  -2  -5  15 887.593 226.419  10
  -2  -5  16 483.191 222.350  17
   2  -5  16 292.573 197.875  17
  -2  -5  16 451.507 190.731  14
   2   5  16 953.466 313.245  34
  -2   5  16 290.970 261.650  33
   2  -5  16 790.565 301.333  25
  -2  -5  16 411.257 192.499  10
   2   5  17 992.408 306.908  34
  -2   5  17 720.574 304.030  33
   2  -5  17 1211.29 297.488  25
  -2  -5  17 743.169 241.494  17
   2  -5  17 548.676 240.441  17
  -2  -5  17 1026.70 249.280  14
   2   5  18 1280.88 292.986  34
  -2   5  18 1206.56 309.794  33
  -2  -5  18 1014.42 257.072  14
  -2  -5  18 1141.04 262.071  13
   2  -5  18 1146.74 301.520  25
  -2  -5  18 1401.63 295.558  17
   2  -5  18 362.689 224.076  17
   2   5  19 1474.08 293.999  34
  -2  -5  19 1472.61 271.015  13
  -2  -5  19 1671.70 293.171  14
   2  -5  19 1119.53 283.848  13
   2  -5  19 1482.36 243.977  26
   2  -5  19 793.441 256.685  25
   2  -5  19 997.969 255.617  17
  -2  -5  19 1235.02 289.322  17
   2   5  20 549.788 220.327  34
   2  -5  20 408.656 208.665  13
  -2  -5  20 652.096 200.204  13
  -2  -5  20 517.775 181.773  14
   2  -5  20 405.762 153.638  26
   2  -5  20 744.386 242.758  25
  -2  -5  20 437.934 194.089  17
   2  -5  20 679.642 220.197  17
   2  -5  21 216.449 181.434  13
  -2  -5  21 215.003 148.347  13
  -2  -5  21 51.3756 158.901  14
  -2   5  21-61.8479 221.486  34
   2   5  21 323.525 192.297  34
   2  -5  21 165.688 162.269  25
  -2  -5  21-60.8031 146.867  17
   2  -5  21 198.920 160.075  17
  -2  -5  22 1400.46 220.856  13
   2  -5  22 1712.58 246.196  13
  -2   5  22 976.273 253.563  34
   2   5  22 1117.53 239.372  34
   2  -5  22 899.402 217.595  25
   2  -5  22 1088.64 225.045  17
  -2  -5  22 1139.62 231.047  17
  -2  -5  23 348.992 143.697  13
   2  -5  23 302.588 157.239  13
  -2   5  23 586.615 178.975  34
   2   5  23 218.915 157.951  34
   2  -5  23 231.658 148.742  25
  -2  -5  23 238.927 142.947  17
   2  -5  23 276.065 138.309  17
  -2  -5  24 413.205 138.250  13
   2  -5  24 295.078 134.827  13
  -2   5  24 159.980 154.842  34
   2   5  24 281.547 156.090  34
   2  -5  24 71.7531 126.559  25
  -2  -5  24 393.068 132.941  17
   2  -5  24 125.742 101.720  17
  -2  -5  25 197.769 113.398  13
   2  -5  25 253.755 107.086  13
  -2   5  25 150.997 125.702  34
   2   5  25 152.613 119.036  34
   2  -5  25 134.159 106.034  25
  -2  -5  25 35.2694 93.5680  17
   2  -5  25 207.601 90.8695  17
  -2  -5  26 572.781 116.660  17
  -2   5  26 649.606 139.421  34
   2   5  26 594.917 132.588  34
  -2  -5  26 625.650 120.643  13
   2  -5  26 451.459 99.8706  13
  -2  -5  27 85.9086 75.2199  13
  -2  -5  28 312.170 67.7817  13
  -2  -6 -22 49.2158 56.0472   4
  -2  -6 -21 659.145 111.351   4
  -2  -6 -20 39.2357 86.5819   4
   2  -6 -20 36.9439 52.4510   4
  -2  -6 -19 880.482 160.286  23
   2  -6 -19 541.736 106.232   4
  -2  -6 -18 696.716 164.383  23
   2  -6 -18 521.600 122.353   4
  -2  -6 -17 3045.85 312.019  23
   2  -6 -17 1700.60 222.281   4
  -2  -6 -16 506.518 190.144  23
   2  -6 -16 272.172 132.463   4
  -2  -6 -15 2166.34 298.346  23
   2  -6 -15 1662.67 323.953  27
   2  -6 -15 1815.86 260.482   4
  -2  -6 -14 111.348 191.978  23
   2  -6 -14 262.570 242.969  27
   2  -6 -14 23.2339 143.697   4
  -2  -6 -13 965.855 243.306  23
   2  -6 -13 1067.88 328.936  27
   2  -6 -13 525.933 177.887   4
  -2  -6 -12 515.710 218.593  23
   2  -6 -12 317.188 157.360   4
  -2  -6 -11 831.853 240.791  23
   2  -6 -11 617.244 186.417   4
  -2  -6 -11 754.628 164.477   9
   2  -6 -10 598.041 193.160   4
  -2  -6 -10 457.637 214.099  23
  -2  -6 -10 747.388 185.247   9
   2  -6 -10 506.629 291.287  16
   2  -6  -9 6154.87 515.204   4
   2  -6  -9 5539.91 606.156  16
  -2  -6  -9 6629.24 542.085  23
  -2  -6  -9 5694.70 499.239   9
   2  -6  -8 2254.02 319.854   4
   2  -6  -8 2874.26 464.240  27
   2  -6  -8 2967.57 474.075  16
  -2  -6  -8 2494.88 336.874  23
  -2  -6  -8 3440.32 363.408   9
   2  -6  -7 4786.10 447.200   4
   2  -6  -7 4479.04 559.787  27
   2  -6  -7 5381.24 616.841  16
  -2  -6  -7 4452.55 448.882  23
  -2  -6  -7 4785.57 461.722   9
   2  -6  -6 1779.10 363.581   4
   2  -6  -6 1860.04 387.248  27
   2  -6  -6 2121.07 470.591  16
  -2  -6  -6 1608.01 280.989  23
  -2  -6  -6 1594.73 278.989   9
   2  -6  -5 50.1232 143.190   4
   2  -6  -5 214.830 272.033  27
   2  -6  -5 382.553 354.629  16
  -2  -6  -5 53.7173 183.393  23
  -2  -6  -5-30.6466 266.311   9
   2  -6  -4 676.368 203.420   4
   2  -6  -4 681.348 320.966  27
   2  -6  -4 1056.12 436.119  16
  -2  -6  -4 845.675 214.176  23
  -2  -6  -4 1031.23 242.792   9
   2  -6  -3 2553.97 325.788   4
   2  -6  -3 2161.75 406.435  27
   2  -6  -3 2526.05 535.900  16
  -2  -6  -3 3059.73 349.367  23
  -2  -6  -3 2618.88 347.857   9
   2  -6  -2 1125.08 250.783   4
   2  -6  -2 1088.22 338.370  27
   2  -6  -2 1427.41 489.331  16
  -2  -6  -2 1346.73 254.653  23
  -2  -6  -2 1183.88 263.263   9
  -2  -6  -1 4308.85 466.820   9
   2  -6  -1 4370.76 427.989   4
   2  -6  -1 4917.68 557.358  27
   2  -6   0 1235.95 254.341  17
   2  -6   0 2028.68 570.063  16
  -2  -6   0 1816.79 291.602   9
   2  -6   0 1673.49 281.813   4
   2  -6   0 1267.88 334.048  27
   2  -6   0 1634.18 326.702  26
   2  -6   1 5938.87 753.370  16
   2  -6   1 4786.77 457.010  17
  -2  -6   1 5590.57 506.261   9
   2  -6   1 5124.14 461.816   4
   2  -6   1 5169.52 532.805  26
   2  -6   1 5040.44 576.881  27
   2  -6   2 488.353 189.220  17
  -2  -6   2 985.782 243.238   9
   2  -6   2 399.741 197.970   4
   2  -6   2 555.967 293.340  27
   2  -6   2 633.830 251.400  26
   2  -6   3 2163.15 293.369  17
  -2  -6   3 3067.26 374.964   9
   2  -6   3 2373.89 311.834   4
   2  -6   3 2569.67 401.504  27
   2  -6   3 1820.18 333.262  26
   2  -6   4 866.602 198.499  17
  -2  -6   4 958.551 233.754   9
   2  -6   4 726.092 199.168   4
   2  -6   4 720.219 279.333  27
   2  -6   4 1008.71 267.591  26
   2  -6   5 99.7676 140.472  17
   2  -6   5 48.5014 368.724  16
  -2  -6   5 98.8129 174.222   9
   2  -6   5 124.900 148.724   4
   2  -6   5 330.529 240.511  27
   2  -6   5-171.883 196.391  26
   2  -6   6 1609.80 263.115  17
   2  -6   6 2002.45 456.334  16
   2  -6   6 1743.64 324.191  27
   2  -6   6 1020.80 286.638  26
  -2  -6   6 1840.25 305.138   9
   2  -6   6 1347.55 292.645   4
  -2  -6   7 5279.58 513.707  13
   2  -6   7 5875.51 654.493  16
   2  -6   7 5302.90 485.119  17
   2  -6   7 6255.00 502.643   4
   2  -6   7 6090.36 563.017  26
   2  -6   8 1775.69 323.915  26
  -2  -6   8 1657.30 304.618  13
   2  -6   8 2044.63 276.329  17
   2  -6   8 1970.99 409.251  16
   2  -6   9 6184.92 569.423  26
  -2  -6   9 5935.19 527.987  13
   2  -6   9 6269.57 630.829  16
   2  -6   9 6472.58 532.117  17
   2  -6  10 372.897 204.102  26
   2  -6  10 383.745 157.026  17
   2  -6  10 297.718 269.575  16
  -2  -6  10 324.620 188.965  13
  -2  -6  10 258.336 164.328  14
   2  -6  11 596.321 224.869  26
  -2  -6  11 532.051 185.350  14
  -2  -6  11 544.572 198.787  13
   2  -6  11 534.346 176.135  17
   2  -6  11 749.328 268.375  16
   2   6  11 845.548 259.784  34
   2  -6  12 291.623 174.024  26
  -2  -6  12 533.992 194.212  13
  -2  -6  12 1091.44 220.014  14
   2  -6  12 575.275 176.426  17
   2   6  12 646.123 222.186  34
   2  -6  13 398.264 170.760  26
   2   6  13 563.333 217.352  34
   2  -6  13 318.414 151.257  17
  -2  -6  13 480.934 176.286  13
  -2  -6  13 724.965 197.881  14
   2   6  14-42.4914 157.577  34
   2  -6  14 70.8989 138.815  17
  -2  -6  14 70.0005 137.057  14
  -2  -6  14 175.150 145.563  13
   2  -6  14-24.4116 190.031  13
   2   6  15 2955.90 304.283  34
   2  -6  15 2185.11 282.260  17
  -2  -6  15 2806.76 287.523  13
  -2  -6  15 3021.15 309.265  14
   2  -6  15 2258.28 311.293  13
   2   6  16 387.585 151.549  34
  -2  -6  16 359.800 153.575  14
   2  -6  16 284.327 159.929  13
  -2  -6  16 214.807 132.322  13
   2  -6  16 258.271 139.048  17
  -2  -6  17 3345.10 296.300  13
   2  -6  17 2824.09 306.093  13
  -2  -6  17 3436.36 313.715  14
  -2  -6  17 2838.70 315.523  17
   2  -6  18 384.583 146.885  13
  -2  -6  18 367.255 123.476  14
  -2  -6  18 288.977 121.671  17
   2  -6  19 539.230 143.914  13
  -2  -6  19 464.164 123.193  17
   2  -6  20-80.8498 107.605  13
  -2  -6  21 480.578 101.971  13
   2  -6  21 238.928 92.0239  13
  -2  -6  22 323.795 80.3312  13
   2  -6  22 190.677 69.7004  13
  -2  -7   2 1114.29 174.335  14
  -2  -7   3 735.139 142.162  14
  -2  -7   4 2427.58 242.300  14
  -2  -7   5 1435.66 183.356  14
  -2  -7   6 10622.2 635.883  14
  -2  -7   7 1349.03 168.147  14
  -2  -7   8 4483.23 322.943  14
  -2  -7   9 460.825 104.045  14
   3   0 -31-77.6001 118.040   1
   3   0 -30-17.1093 114.442   1
   3   0 -29 74.1793 114.697   1
   3   0 -18-107.320 358.953  31
   3   0 -17-109.091 394.106  31
   3   0 -16 111.945 418.609  31
  -3   0 -15 250.996 218.571   8
   3   0 -15-116.996 451.879  31
   3   0 -14 218.684 408.979  31
   3   0 -13-93.2728 422.390  31
   3   0 -12 317.193 412.559  31
   3   0 -11 469.162 343.148  31
   3   0 -10-56.7430 289.890  31
  -3   0  -8 135.520 185.146  38
  -3   0  -7 53.4647 225.006  38
  -3   0  -6-61.9326 253.693  38
   3   0  -5 9.48920 71.5535  28
  -3   0  -5 70.9268 313.793  38
  -3   0  -4-160.609 379.890  38
  -3   0  -3-88.4985 409.775  38
  -3   0  -2 289.911 427.769  38
  -3   0  -1 319.548 534.356  38
  -3   0  -1 64.0055 163.539  32
  -3   0   0-114.258 551.560  38
  -3   0   0 124.409 167.245  32
  -3   0   1-30.9531 152.382  32
   3   0   2 140.914 187.030  29
  -3   0   2 62.7326 160.303  32
   3   0   3 338.055 196.162  29
  -3   0   3-65.2193 178.183  32
   3   0   4 144.717 181.188  29
  -3   0   4-111.846 482.939  38
  -3   0   4 172.600 194.418  32
   3   0   5 65.2644 196.773  29
  -3   0   5 110.380 464.518  38
   3   0   6 187.621 205.247  29
  -3   0   6 538.195 519.716  38
   3   0   7 131.868 258.204  29
  -3   0   7 106.027 446.227  38
   3   0   8 52.2492 280.857  29
   3   0   8 33.4182 193.580  30
  -3   0   8-104.722 428.940  38
   3   0   9-62.7057 302.693  29
   3   0   9 119.937 200.561  30
  -3   0   9-103.698 400.455  38
   3   0  10 48.7220 261.896  30
   3   0  10 75.1992 370.188  29
  -3   0  10-205.760 421.396  38
   3   0  11 120.102 265.686  30
   3   0  11 89.4206 422.933  29
  -3   0  11-102.285 342.086  38
   3   0  12-54.8640 220.001  34
   3   0  12-73.7873 348.993  30
   3   0  12 104.751 535.135  29
   3   0  13 55.9004 228.996  34
   3   0  13-89.9644 368.510  30
   3   0  13 846.274 559.768  29
  -3   0  13 89.4492 395.755  30
   3   0  14-137.904 610.134  29
   3   0  14 107.662 441.014  30
  -3   0  14 183.230 318.945  30
  -3   0  14 108.512 177.705  20
   3   0  14 27.1360 219.248  34
  -3   0  14 163.424 180.348  33
   3   0  15 134.327 207.568  34
  -3   0  15 299.261 204.370  33
  -3   0  15 224.913 212.732  19
   3   0  15 126.943 548.110  30
   3   0  15 312.959 585.120  29
  -3   0  15-187.839 339.312  30
  -3   0  15 31.0143 179.738  20
  -3   0  15 62.6063 181.410   8
   3   0  16-53.6299 191.994  34
  -3   0  16 87.0712 172.733  33
  -3   0  16-31.6830 205.192  19
   3   0  16 147.131 449.189  30
   3   0  16 589.433 603.578  29
  -3   0  16 96.2678 335.102  30
  -3   0  16-71.3435 215.073  20
  -3   0  16 57.8301 176.557   8
   3   0  17-336.392 669.519  30
   3   0  17-140.257 488.225  29
  -3   0  17 197.519 330.289  30
  -3   0  17 62.8991 203.681  19
  -3   0  17 123.767 232.247  20
   3   0  17-53.7361 188.844  34
  -3   0  17 28.6758 166.111  33
   3   0  18 153.668 492.053  30
   3   0  18 135.801 490.568  29
  -3   0  18 101.386 379.109  30
  -3   0  18 125.271 198.297  19
  -3   0  18-42.1154 240.571  20
   3   0  18 54.3208 183.585  34
   3   0  19-144.643 463.150  30
   3   0  19 265.888 425.690  29
  -3   0  19-208.152 389.157  30
  -3   0  19-31.1989 192.878  19
  -3   0  19 40.6986 207.924  20
   3   0  19-54.8872 203.524  34
  -3   0  20 31.6949 112.430  34
   3   0  20-111.490 186.433  34
   3   0  20-28.9185 176.575  35
   3   0  20 691.451 534.040  30
   3   0  20-131.337 491.083  29
  -3   0  20-106.647 341.483  30
  -3   0  20 39.7137 202.882  20
  -3   0  20 93.2854 212.276  19
  -3   0  21 16.2436 106.375  34
   3   0  21 84.7208 182.901  34
   3   0  21 29.0078 185.773  35
   3   0  21 130.464 398.307  29
   3   0  21 133.799 447.476  30
  -3   0  21 109.181 349.600  30
  -3   0  21-38.8509 245.962  20
  -3   0  21 92.9933 189.278  19
  -3   0  22-16.6467 106.605  34
   3   0  22-57.2588 189.489  34
   3   0  22 145.346 198.445  35
   3   0  22-130.330 417.314  30
   3   0  22-130.083 397.139  29
  -3   0  22 111.851 358.145  30
  -3   0  22 38.1032 201.486  20
  -3   0  22 30.9882 193.884  19
   3   0  23 127.471 348.080  30
   3   0  23 520.201 486.272  29
  -3   0  23-114.310 366.020  30
   3   0  23 58.2954 190.856  35
  -3   0  23 33.9114 108.585  34
   3   0  23-116.335 202.477  34
  -3   0  23-30.9303 179.167  19
   3   0  24-125.097 341.597  30
   3   0  24-129.951 416.100  29
  -3   0  24 232.981 405.495  30
   3   0  24 29.2137 178.377  35
  -3   0  24 91.5952 176.858  19
  -3   0  24-17.0582 105.451  34
   3   0  24 58.7536 190.254  34
   3   0  25-368.569 410.926  30
   3   0  25 129.568 414.925  29
  -3   0  25 236.189 426.645  30
  -3   0  25-120.153 196.793  19
   3   0  25 29.5479 191.471  34
   3   0  26 120.286 348.393  30
   3   0  26-258.006 393.849  29
  -3   0  26-118.953 344.530  30
  -3   0  26-29.4946 166.053  19
  -3   0  26 54.1725 173.475  10
   3   0  26 325.077 195.612  34
   3   0  27-117.254 339.604  30
   3   0  27-127.768 427.304  29
  -3   0  27 118.779 303.397  30
  -3   0  27-57.5118 182.047  19
  -3   0  27 157.026 178.660  10
   3   0  27-58.6191 196.044  34
  -3   0  28-100.242 172.800  10
   3   0  28 454.496 410.454  30
   3   0  28 251.160 342.925  29
  -3   0  28-352.680 393.171  30
   3   0  28 28.7878 188.517  34
  -3   0  29 142.675 168.885  10
   3   0  29 327.274 297.995  30
   3   0  29 489.150 409.049  29
  -3   0  29 229.791 313.840  30
   3   0  29 55.9465 177.268  34
  -3   0  30-111.613 147.754  10
   3   0  30 235.446 340.964  29
  -3   0  30-111.003 303.115  30
   3   0  30 53.6745 175.734  34
   3   0  31-50.6884 169.521  34
  -3   0  31 20.6625 151.923  10
   3   0  32 165.014 170.310  34
  -3   0  32 37.4453 137.659  10
   3   0  32-136.896 155.757  35
   3   0  33 107.753 152.891  34
  -3   0  33 33.2423 139.893  10
   3   0  33-83.1195 143.270  35
   3   0  34 19.3006 135.654  34
  -3   0  34 99.9947 125.644  10
   3   0  34-74.1901 130.361  35
   3   0  35 16.9352 117.905  34
  -3   0  35-47.0015 114.013  10
   3   0  35 145.370 122.792  35
   3   0  36 43.6015 112.259  34
   3   0  36-13.6561 100.416  35
   3   0  36-198.676 148.029  24
  -3   0  36 35.7898 85.9588  10
  -3   0  37 34.7509 106.121  12
   3   0  37 44.3918 81.6335  35
   3   0  37-12.0595 83.9908  34
   3   0  37-248.413 144.127  24
  -3   0  38 27.2032 90.1405  12
  -3   0  39-6.39779 61.7672  12
   3  -1 -36 884.454 119.055   1
   3  -1 -35 530.180 124.272   1
   3  -1 -34 809.962 150.910   1
   3  -1 -33 1447.62 201.160   1
   3  -1 -32 2209.71 262.490   1
   3  -1 -31 1348.60 226.275   1
   3  -1 -30 152.401 142.749   1
   3  -1 -29 1776.17 272.633   1
   3  -1 -28 14932.0 954.579   1
   3  -1 -27 7937.63 625.847   1
   3  -1 -22 6091.23 1126.74  31
   3  -1 -21 644.598 539.847  31
  -3  -1 -20 1945.96 301.136  23
   3  -1 -20 1001.10 629.837  31
  -3  -1 -19 610.743 239.156  23
   3  -1 -19 174.344 558.873  31
  -3  -1 -18 7094.10 637.006  23
   3  -1 -18 7021.83 1305.22  31
  -3  -1 -17 8848.23 707.017  23
   3  -1 -17 9342.12 1378.86  31
  -3  -1 -16 17996.6 1147.60  23
   3  -1 -16 18376.9 1863.09  31
  -3  -1 -15 11240.9 799.504  23
   3  -1 -15 13761.7 1431.84  31
  -3  -1 -14 6530.52 539.307  23
   3  -1 -14 7879.93 1053.07  31
  -3  -1 -14 7409.60 923.546   8
   3  -1 -13 6655.55 925.216  31
  -3   1 -13 6855.23 630.104  38
  -3  -1 -13 7220.92 926.057   8
  -3  -1 -13 7087.17 542.384  23
  -3  -1 -12 8035.59 992.211   8
  -3   1 -12 6920.14 682.859  38
  -3  -1 -11 15172.9 1408.87   8
  -3   1 -11 13123.2 1070.41  38
  -3  -1 -10 30231.7 2240.68   8
  -3   1 -10 27726.9 1858.41  38
  -3  -1  -9 104.376 377.046   8
   3  -1  -9 40.0919 173.117  28
  -3  -1  -8 33724.3 2416.48   8
   3  -1  -8 29815.5 1819.37  28
  -3  -1  -7 10746.8 1259.14   8
   3  -1  -7 9809.69 773.153  28
  -3  -1  -6 21734.5 1789.39   8
   3  -1  -6 21089.5 1139.37  28
  -3  -1  -5 24056.5 1974.71   8
   3  -1  -5 25040.9 1324.42  28
   3   1  -4 84538.7 4210.75  31
  -3   1  -3 32968.4 2008.52  32
  -3   1  -2 11161.2 891.763  32
  -3   1  -1 16496.3 1132.41  32
  -3  -1  -1 15096.3 967.078  32
  -3   1   0 13426.9 974.487  32
  -3  -1   0 12634.6 823.441  32
  -3  -1   1 9104.46 629.347  32
  -3   1   1 9364.67 774.498  32
  -3  -1   2 12152.1 797.446  32
  -3   1   2 12693.2 962.449  32
   3   1   2 12610.3 715.676  29
  -3  -1   3 24847.0 1300.70  30
  -3   1   3 25694.1 1595.72  32
  -3   1   3 23997.5 1867.97  38
   3   1   3 23977.4 1347.46  29
  -3  -1   4 87444.1 4508.66  30
  -3   1   4 94634.2 5189.05  38
   3  -1   4 92135.4 4761.01  29
   3  -1   5 23159.3 1534.13  29
  -3   1   5 25747.1 1891.78  38
  -3  -1   5 22924.6 1376.91  30
  -3  -1   5 24177.4 2064.24   8
   3  -1   6 25297.3 1580.30  29
  -3   1   6 24354.0 1845.78  38
  -3  -1   6 21762.0 1426.51  30
  -3  -1   6 21968.7 1946.56   8
   3  -1   7 14408.4 1071.40  29
   3   1   7 11619.6 721.055  30
  -3   1   7 12269.7 1248.60  38
  -3  -1   7 12651.8 973.867  30
  -3  -1   7 13956.9 1410.08   8
  -3  -1   8 21748.2 1212.40  29
   3  -1   8 28048.4 1679.15  29
   3   1   8 22109.7 1301.36  30
  -3   1   8 26473.5 1908.20  38
  -3  -1   8 23293.2 1565.33  30
  -3  -1   8 25473.1 1973.04   8
   3  -1   9 750.909 374.257  29
  -3  -1   9 659.676 354.131  30
   3   1   9 888.721 245.006  30
   3  -1   9 716.102 166.780  35
  -3   1   9 1318.15 499.257  38
  -3   1   9 716.048 145.224  36
  -3  -1   9 1010.21 458.957   8
  -3  -1  10 25879.5 1954.58   8
   3  -1  10 22453.0 1270.35  34
   3   1  10 23881.8 1525.98  30
  -3  -1  10 23653.4 1710.52  30
  -3   1  10 22427.8 1238.58  36
  -3   1  10 24437.2 1890.76  38
   3  -1  10 21631.3 1272.21  35
   3  -1  10 24187.8 1721.03  29
  -3  -1  10 23894.8 1347.04  20
  -3  -1  10 23331.7 1340.49  19
  -3  -1  11 14408.9 1388.41   8
   3  -1  11 12873.9 837.799  34
   3   1  11 13323.9 870.887  34
   3   1  11 13180.0 1144.86  30
  -3  -1  11 14730.3 1262.36  30
   3  -1  11 14012.0 850.887  35
  -3   1  11 15738.8 1427.90  38
  -3   1  11 13856.3 802.366  36
   3  -1  11 14371.5 1285.90  29
  -3  -1  11 14465.3 917.950  20
  -3  -1  11 12572.1 871.178  19
  -3  -1  12 10209.8 1117.63   8
   3  -1  12 9793.82 669.801  34
   3   1  12 8886.44 662.870  34
  -3  -1  12 11452.9 1069.40  30
  -3   1  12 11553.2 1217.70  38
   3  -1  12 9623.60 668.655  35
  -3   1  12 9246.71 605.287  36
   3  -1  12 9680.68 1110.35  29
   3  -1  12 10129.9 1080.75  30
   3   1  12 7711.24 960.628  30
  -3  -1  12 9448.76 725.141  20
  -3  -1  12 9237.45 674.060  19
  -3  -1  13 5522.31 792.669   8
   3  -1  13 6312.29 519.077  34
   3   1  13 5620.77 495.007  34
  -3   1  13 5449.85 435.808  36
   3  -1  13 5441.30 496.892  35
  -3   1  13 7054.07 994.710  38
   3  -1  13 6706.67 914.118  30
   3   1  13 4649.03 830.779  30
   3  -1  13 4747.76 868.046  29
  -3  -1  13 5754.94 797.754  30
  -3  -1  13 6477.21 588.918  20
  -3  -1  13 6041.27 505.924  19
  -3  -1  14 5564.34 800.669   8
   3  -1  14 6398.38 557.648  34
   3   1  14 5166.02 485.606  34
   3  -1  14 5551.88 546.314  35
  -3   1  14 5703.74 901.229  38
   3  -1  14 6855.68 1028.58  30
   3  -1  14 6554.39 1027.07  29
  -3  -1  14 5513.80 781.983  30
   3   1  14 5663.19 967.324  30
  -3  -1  14 6139.65 599.101  20
  -3  -1  14 7232.23 530.085  19
   3  -1  15 10636.5 1379.71  30
   3  -1  15 10682.1 1381.61  29
   3   1  15 9049.16 1214.57  30
   3  -1  15 9552.08 748.379  35
  -3   1  15 9010.96 1185.21  38
  -3  -1  15 9272.06 689.646  19
   3  -1  15 9572.74 742.862  34
  -3  -1  15 9041.52 1052.68  30
  -3   1  15 10194.1 732.292  33
   3   1  15 10361.1 702.439  34
   3  -1  16 22670.6 2166.11  29
   3  -1  16 19992.6 2152.60  30
   3  -1  16 23022.7 1388.40  34
  -3  -1  16 25483.1 1851.23  30
   3   1  16 18599.6 1857.22  30
  -3   1  16 21788.2 1352.75  33
   3   1  16 21380.1 1278.94  34
  -3   1  16 23754.8 1346.95  20
   3  -1  16 22778.2 1378.94  35
  -3   1  16 19722.1 1247.18  34
  -3   1  16 22256.4 1928.66  38
  -3   1  17 7213.92 1000.01  38
   3  -1  17 6614.93 617.932  34
  -3   1  17 7040.91 627.611  33
  -3   1  17 5624.66 494.701  34
   3   1  17 6948.04 534.903  34
   3  -1  17 5911.42 1237.99  30
   3  -1  17 6035.87 1197.95  29
  -3  -1  17 5661.20 842.363  30
   3   1  17 6329.44 972.722  30
  -3   1  17 6744.17 591.766  20
  -3  -1  17 6062.56 572.803  10
   3  -1  18 6868.21 609.391  34
  -3   1  18 6402.62 634.466  33
   3   1  18 6424.35 520.761  34
  -3   1  18 5298.06 470.803  34
  -3  -1  18 5883.00 481.036  13
   3  -1  18 5480.69 1272.37  30
   3  -1  18 6940.83 1295.20  29
  -3  -1  18 4734.02 801.984  30
   3   1  18 5402.49 893.127  30
  -3   1  18 7020.71 626.275  20
  -3  -1  18 5384.78 563.881  10
  -3   1  19 979.247 288.931  19
  -3   1  19 1114.37 220.380  34
   3   1  19 831.871 240.060  34
   3  -1  19 1148.43 292.872  34
  -3   1  19 1355.48 352.144  33
  -3  -1  19 1215.35 220.195  13
   3  -1  19 217.133 665.030  30
   3  -1  19 2008.63 742.451  29
  -3  -1  19 1274.57 485.570  30
  -3   1  19 685.231 563.854  30
   3   1  19 825.755 437.615  30
  -3   1  19 1587.07 377.798  20
  -3  -1  19 1078.62 313.070  10
  -3   1  20 2370.97 376.947  19
  -3   1  20 1764.23 261.130  34
   3   1  20 2566.95 328.668  34
   3  -1  20 1869.53 338.103  34
  -3   1  20 1984.32 368.321  33
  -3  -1  20 2128.84 272.119  13
   3  -1  20 2141.61 1016.84  30
   3  -1  20 2412.99 751.097  29
  -3   1  20 1507.53 641.902  30
  -3  -1  20 1418.78 508.208  30
   3   1  20 1644.99 552.231  30
  -3   1  20 1915.47 375.658  20
  -3  -1  20 1915.92 370.406  10
  -3   1  21 2196.17 359.920  19
  -3  -1  21 2396.00 328.853  19
  -3   1  21 2165.10 277.203  34
   3   1  21 2384.09 330.431  34
   3  -1  21 2509.55 365.419  34
  -3   1  21 2141.12 391.452  33
  -3  -1  21 2627.57 300.650  13
   3  -1  21 902.435 727.156  30
  -3   1  21 3286.05 801.015  30
   3  -1  21 2183.82 730.898  29
  -3  -1  21 2923.99 639.534  30
   3   1  21 1953.27 572.550  30
  -3   1  21 2632.13 402.960  20
  -3  -1  21 1908.41 350.722  10
  -3   1  22 1995.65 342.600  19
  -3  -1  22 1594.68 292.751  19
  -3   1  22 1720.42 247.929  34
   3   1  22 2018.60 308.730  34
   3  -1  22 2031.74 333.505  34
  -3  -1  22 2196.04 270.071  13
   3  -1  22 1018.12 790.819  30
  -3  -1  22 1627.97 414.068  29
   3  -1  22 1367.65 611.581  29
  -3   1  22 2182.29 637.915  30
  -3  -1  22 1072.25 482.877  30
   3   1  22 2366.09 586.095  30
  -3   1  22 2217.29 382.558  20
  -3  -1  22 1732.25 353.569  10
  -3   1  23 1963.46 334.279  19
  -3  -1  23 1670.55 312.065  19
  -3   1  23 1985.93 260.739  34
   3   1  23 2200.79 325.543  34
   3  -1  23 2075.89 341.151  34
  -3  -1  23 1850.66 255.015  13
   3  -1  23 1289.01 647.984  30
  -3  -1  23 1573.44 419.470  29
   3  -1  23 2974.57 817.478  29
   3   1  23 1233.47 514.356  30
  -3   1  23 1355.21 562.714  30
  -3  -1  23 1534.74 537.162  30
  -3   1  23 2281.20 377.861  20
  -3  -1  23 2118.10 355.379  10
  -3   1  24 1824.42 256.014  34
   3   1  24 2195.57 333.174  34
   3  -1  24 2310.41 350.641  34
  -3  -1  24 2205.00 274.942  13
   3  -1  24 1385.21 750.100  30
   3  -1  24 2763.81 750.252  29
  -3   1  24 1747.90 617.536  30
  -3  -1  24 1785.85 569.364  30
   3   1  24 1741.61 524.200  30
  -3  -1  24 2382.99 369.792  10
  -3   1  24 2639.51 369.061  19
   3  -1  25 9037.99 691.654  35
   3  -1  25 9639.06 718.698  34
  -3   1  25 7996.15 605.490  34
   3   1  25 9643.47 697.994  34
  -3  -1  25 8658.60 615.666  13
   3  -1  25 9428.47 1335.01  30
   3  -1  25 9388.56 1301.17  29
  -3   1  25 8878.15 1222.07  30
  -3  -1  25 7690.04 1083.31  30
  -3  -1  25 9081.20 719.490  10
  -3   1  25 8846.62 695.374  19
   3  -1  26 20587.6 1263.43  35
   3  -1  26 21531.7 1285.95  34
   3   1  26 21993.7 1274.40  34
  -3  -1  26 17177.4 1754.90  30
  -3   1  26 20920.2 1972.89  30
  -3   1  26 19096.6 1169.97  34
  -3  -1  26 20502.6 1177.00  13
   3   1  26 21550.4 1963.34  29
   3  -1  26 20811.5 2021.11  29
   3  -1  26 18339.1 1982.47  30
  -3  -1  26 20988.4 1288.72  10
  -3   1  26 20293.3 1258.49  19
   3  -1  27 7737.99 616.947  34
  -3   1  27 6050.86 498.342  34
   3   1  27 7291.78 590.805  34
   3  -1  27 7398.29 596.089  35
   3   1  27 7991.18 608.397  35
   3  -1  27 7281.81 1125.81  30
   3   1  27 6148.78 1049.58  29
   3  -1  27 6880.50 1087.98  29
  -3   1  27 8642.96 1155.24  30
  -3  -1  27 8053.49 1070.63  30
  -3  -1  27 5850.12 575.240  10
  -3   1  27 7263.43 583.122  19
   3  -1  28 14607.4 927.999  34
  -3   1  28 12016.1 808.519  34
  -3  -1  28 13096.4 1412.88  30
  -3   1  28 11833.0 1416.22  30
   3   1  28 14487.6 916.907  34
   3   1  28 14864.1 921.405  35
   3  -1  28 14341.7 914.304  35
   3  -1  28 14221.4 1560.35  29
  -3  -1  28 13533.9 903.460  10
  -3   1  28 12708.7 877.629  19
  -3   1  29 1922.29 233.090  34
   3   1  29 2488.49 326.121  34
   3  -1  29 2154.94 322.916  34
   3   1  29 2858.03 340.347  35
   3  -1  29 2515.68 328.166  35
  -3   1  29 2612.00 647.191  30
   3   1  29 1408.78 554.096  29
   3  -1  29 2628.40 681.322  29
  -3  -1  29 1856.49 568.152  30
  -3  -1  29 2145.04 330.373  10
  -3   1  29 2116.05 293.409  19
   3   1  30-224.816 604.281  29
   3  -1  30 357.525 381.684  29
  -3   1  30 452.781 309.206  30
  -3  -1  30 105.216 287.427  30
   3  -1  30 126.170 165.432  35
   3   1  30 362.645 178.779  35
  -3  -1  30 147.160 170.948  10
   3   1  30 26.0947 181.852  34
   3  -1  30 211.903 189.826  34
   3   1  31 387.942 192.726  35
   3  -1  31 656.528 190.528  35
  -3  -1  31 386.801 182.325  10
   3   1  31 392.339 197.739  34
   3  -1  31 322.430 185.092  34
  -3  -1  32 1579.39 250.305  10
   3  -1  32 1561.75 238.088  35
   3  -1  32 1570.33 254.492  24
   3  -1  32 1607.04 228.568  18
   3   1  32 1242.06 232.333  34
   3  -1  32 1649.87 260.096  34
  -3  -1  33 820.764 190.087  10
   3  -1  33 691.736 178.140  35
   3  -1  33 824.009 193.971  24
   3  -1  33 601.952 162.838  18
   3   1  33 512.621 170.089  34
   3  -1  33 747.477 186.707  34
  -3  -1  34 1358.47 212.138  10
   3   1  34 1332.02 209.372  34
   3  -1  34 1566.93 204.709  35
   3  -1  34 1201.73 209.726  24
   3  -1  34 1036.23 171.019  18
   3   1  35 699.430 149.800  34
   3  -1  35 516.246 137.233  35
  -3  -1  35 1007.69 188.640  12
   3  -1  35 640.984 156.436  24
  -3  -1  35 579.848 144.585  10
   3   1  36 796.231 147.368  34
   3  -1  36 725.817 137.124  35
  -3  -1  36 974.304 169.401  12
   3  -1  36 844.999 152.630  24
  -3  -1  36 947.365 144.989  10
  -3  -1  37 2918.02 224.779  10
  -3  -1  37 3103.44 246.871  12
  -3   1  37 2987.31 242.099  12
   3   1  37 2617.52 232.540  35
   3  -1  37 3111.63 245.192  24
   3   1  37 2754.88 238.808  34
  -3   1  38 5062.81 302.724  12
  -3  -1  38 4304.13 272.228  10
  -3  -1  38 5196.55 304.980  12
   3  -1  38 3988.10 298.595  10
  -3  -2 -37 2939.71 209.913   1
  -3   2 -36 6415.38 417.455  37
   3  -2 -36 5977.02 378.110   1
  -3   2 -35 13454.0 818.522  37
   3  -2 -35 14550.1 790.617   1
   3  -2 -34 6850.95 459.082   1
   3  -2 -33 10078.3 636.879   1
   3  -2 -32 1949.46 248.677   1
   3  -2 -31 13160.4 827.134   1
   3  -2 -30 16384.9 1007.33   1
   3  -2 -29 25705.3 1485.25   1
   3  -2 -28 4450.97 450.423   1
   3  -2 -27 721.904 241.915   1
  -3  -2 -27 462.315 155.452  23
   3  -2 -26 1064.27 286.899   1
  -3  -2 -26 1229.98 223.242  23
   3  -2 -25 8097.52 694.681   1
  -3  -2 -25 6953.15 576.219  23
   3  -2 -24 18917.9 1292.03   1
   3  -2 -24 21119.8 2215.91  31
  -3  -2 -24 19163.8 1192.07  23
   3  -2 -23 47439.0 2649.66   1
   3  -2 -23 40596.4 3608.79  31
  -3  -2 -23 45701.5 2511.51  23
   3  -2 -22 7114.49 768.976   1
   3  -2 -22 6884.13 1344.99  31
  -3  -2 -22 8840.64 684.661  23
   3  -2 -21 10950.6 970.233   1
   3  -2 -21 8773.09 1595.15  31
  -3  -2 -21 10822.1 828.573  23
   3  -2 -20 19196.2 1526.01   1
   3  -2 -20 23595.4 2603.20  31
  -3  -2 -20 22339.1 1377.49  23
   3  -2 -19 59784.7 3457.38   1
  -3  -2 -19 58999.7 3258.79  23
   3  -2 -19 62104.2 4563.81  31
   3  -2 -18 13722.5 986.689  27
   3  -2 -18 14065.6 1162.25   1
  -3  -2 -18 15246.2 1068.04  23
   3  -2 -18 14005.6 1874.62  31
   3  -2 -17 16783.4 1075.00  27
   3  -2 -17 15363.3 1185.53   1
  -3  -2 -17 15541.7 1116.66  23
   3  -2 -17 18103.2 1980.42  31
   3  -2 -16 10105.9 742.223  27
   3  -2 -16 10107.9 854.665   1
  -3  -2 -16 10939.0 819.831  23
  -3   2 -16 9362.46 713.056  22
   3  -2 -16 12191.6 1504.26  31
   3  -2 -15 19850.7 1145.85  27
  -3  -2 -15 17922.2 1189.73  23
  -3   2 -15 16366.3 1098.69  22
   3  -2 -15 22803.7 1987.65  31
   3  -2 -15 19971.8 1240.49   1
  -3  -2 -14 31197.2 1806.94  23
  -3   2 -14 29126.2 1716.97  22
   3  -2 -14 36241.2 2568.50  31
   3  -2 -14 33795.1 1832.43   1
   3  -2 -13 56822.4 2909.59   1
  -3  -2 -13 54882.0 2905.62  23
  -3   2 -13 52228.1 2826.27  22
  -3  -2 -12 40115.0 2167.06  23
  -3   2 -12 38118.8 2098.15  22
   3  -2 -12 41855.1 2243.30  39
  -3  -2 -11 9359.23 625.355  23
  -3   2 -11 7137.53 547.317  22
   3  -2 -11 7999.59 714.415  39
   3  -2 -11 8695.19 565.546  26
   3  -2 -11 8028.76 900.398  28
   3  -2 -10 14516.3 841.708  26
   3  -2 -10 14932.2 1235.36  28
  -3  -2 -10 13871.6 879.119  23
  -3   2 -10 13752.4 839.285  22
   3  -2  -9 69897.3 3973.65  28
   3  -2  -9 71254.0 3525.87  26
  -3  -2  -9 70580.7 4389.74  15
  -3   2  -9 66523.7 3520.15  22
  -3  -2  -9 71378.2 3576.19  23
   3  -2  -8 28337.8 1843.10  28
   3  -2  -8 26332.1 1421.74  26
  -3  -2  -8 26091.8 1457.83  23
  -3  -2  -8 25953.9 2182.30  15
  -3   2  -7 59783.8 3418.08  32
  -3   2  -7 55307.8 2928.46  37
   3  -2  -7 58831.2 3338.94  28
   3  -2  -7 57374.5 2908.36  26
  -3  -2  -7 58811.7 2949.15  23
  -3  -2  -7 59775.0 3858.35  15
  -3  -2  -7 56087.2 2901.83  17
  -3  -2  -6 16154.1 1794.72   8
  -3   2  -6 15097.5 1217.73  32
  -3   2  -6 13537.0 823.244  37
   3  -2  -6 12768.2 1108.68  28
   3  -2  -6 14578.8 813.738  26
  -3  -2  -6 14294.1 839.161  23
  -3  -2  -6 13519.0 1536.57  15
  -3  -2  -6 13643.6 797.063  17
  -3  -2  -5 12521.9 1715.16   8
  -3   2  -5 13038.7 1079.06  32
  -3   2  -5 10974.9 700.232  37
   3  -2  -5 11860.9 1017.11  28
  -3  -2  -5 11874.7 716.881  23
  -3  -2  -5 13514.1 1592.33  15
  -3  -2  -4 15427.2 1939.21   8
  -3   2  -4 16805.2 1291.36  32
  -3   2  -4 15946.1 937.916  37
   3  -2  -4 16703.9 1274.19  28
  -3  -2  -4 17142.4 955.767  23
  -3  -2  -4 19600.1 1991.39  15
  -3  -2  -3 97723.6 6226.59   8
  -3   2  -3 94547.8 5060.75  32
  -3   2  -3 91028.1 4646.12  37
   3  -2  -3 89927.1 5030.19  28
  -3  -2  -3 94428.6 4660.24  23
  -3  -2  -3 104131. 6115.86  15
  -3  -2  -2 58385.0 4398.50   8
  -3   2  -2 59391.6 2911.50  37
  -3  -2  -2 56425.1 2916.28  23
  -3  -2  -2 56725.5 4275.80  15
  -3   2  -2 58039.7 3293.46  32
  -3  -2  -2 55799.2 2888.99  32
  -3  -2  -1 39178.8 3290.24   8
  -3   2  -1 39162.2 1612.31  37
  -3  -2  -1 38984.8 1629.83  23
  -3  -2  -1 40753.4 3265.80  15
  -3   2  -1 40063.7 2059.87  32
  -3  -2   0 29861.1 2950.12   8
  -3   2   0 26622.4 1732.74  32
  -3   2   0 25253.5 1377.98  37
  -3  -2   0 26255.8 1398.43  23
  -3  -2   0 24343.9 2835.01  15
   3  -2   1 30979.4 1683.51  25
  -3  -2   1 33279.9 1711.75  23
  -3  -2   1 35142.3 3207.21   8
  -3   2   1 33778.7 2076.88  32
  -3  -2   2 58925.4 3016.50  23
  -3   2   2 59969.9 3409.48  32
  -3  -2   3 88975.1 4484.02  23
  -3   2   3 90624.7 4905.85  32
  -3  -2   4 23316.5 2277.36   8
   3  -2   4 20771.0 1106.27  35
  -3   2   4 20161.2 1095.74  36
   3  -2   4 20025.8 1100.07  24
  -3   2   4 18604.0 1098.80  21
  -3  -2   4 20356.5 2094.13  15
  -3   2   5 9194.87 555.513  36
   3  -2   5 8298.16 552.071  35
   3  -2   5 8450.41 556.111  24
  -3  -2   5 10771.5 1486.40   8
  -3  -2   5 7793.44 1292.80  15
  -3  -2   6 15484.4 1790.39   8
   3  -2   6 17322.3 953.490  35
  -3   2   6 16515.1 936.829  36
  -3  -2   6 17755.1 1838.78  15
   3  -2   6 15765.1 936.169  24
   3  -2   7 44792.4 2415.36  35
  -3   2   7 48272.1 2413.23  36
   3  -2   7 48054.7 2417.67  24
  -3  -2   7 48409.3 3354.38  15
   3  -2   7 45568.1 2392.17  18
   3  -2   8 20690.4 1155.69  35
  -3   2   8 21502.6 1142.84  36
  -3  -2   8 17359.8 1219.94  20
   3  -2   8 20633.6 1147.09  24
  -3  -2   8 22090.9 1932.91  15
   3  -2   8 20245.0 1126.02  18
  -3  -2   8 21174.2 1344.67  30
   3  -2   9 62940.6 3286.60  35
  -3   2   9 65449.2 3270.32  36
  -3  -2   9 60386.2 3371.86  20
   3  -2   9 64464.7 3278.95  24
   3  -2   9 62984.8 3256.77  18
  -3  -2   9 66955.3 4127.06  15
  -3  -2   9 68136.7 3361.09  19
   3  -2   9 66169.8 3856.70  29
  -3  -2   9 63174.9 3530.52  30
  -3   2  10 18656.4 1071.89  36
   3   2  10 18866.2 1166.03  34
  -3   2  10 18070.7 1704.04  38
   3  -2  10 18567.3 1085.53  24
  -3  -2  10 17431.7 1160.17  20
   3  -2  10 19204.9 1074.39  18
  -3  -2  10 21108.4 1789.16  15
  -3  -2  10 20289.6 1166.62  19
   3  -2  10 19436.2 1607.95  29
  -3  -2  10 17788.4 1347.94  30
   3   2  11 9703.32 740.266  34
   3  -2  11 10400.2 803.272  39
  -3   2  11 11565.1 1292.36  38
  -3   2  11 9943.53 655.898  36
   3  -2  11 10927.3 1186.13  29
  -3  -2  11 10133.4 961.538  30
   3  -2  11 11067.9 691.799  24
  -3  -2  11 9598.41 741.433  20
   3  -2  11 10041.7 664.075  18
   3  -2  12 32067.1 1883.01  39
  -3   2  12 32518.7 1769.99  36
  -3   2  12 33185.9 2515.27  38
   3  -2  12 33376.4 1810.45  34
   3   2  12 32131.8 1839.73  34
   3  -2  12 34288.0 2454.33  29
  -3  -2  12 34073.8 2200.87  30
   3  -2  12 33388.7 1798.06  24
  -3  -2  12 30355.9 1846.80  20
   3  -2  12 33318.6 1778.94  18
  -3   2  13 54912.4 2842.50  36
  -3   2  13 52885.2 3631.01  38
   3  -2  13 48010.1 2900.27  39
   3  -2  13 56782.5 2894.30  34
   3   2  13 53733.6 2897.65  34
  -3  -2  13 53388.6 2896.47  13
  -3  -2  13 56913.4 2886.55  10
   3  -2  13 60162.0 3689.52  29
  -3  -2  13 48845.6 3273.96  30
  -3  -2  13 53599.6 2922.71  20
   3  -2  13 55120.8 2875.33  24
   3  -2  13 57465.3 2861.87  18
  -3   2  14 22135.5 2019.41  38
   3  -2  14 19741.1 1420.15  39
  -3   2  14 24915.6 1386.72  36
   3  -2  14 23729.7 1421.47  34
   3   2  14 25427.7 1433.27  34
  -3  -2  14 25646.5 1426.73  10
  -3  -2  14 24173.8 1416.75  13
  -3  -2  14 24433.0 1378.32  12
   3  -2  14 27557.6 2202.18  29
  -3  -2  14 24481.1 1893.95  30
   3  -2  14 23758.5 1414.57  24
   3  -2  14 23355.3 1389.68  18
  -3  -2  15 20206.5 1228.07  10
  -3   2  15 16975.3 1759.36  38
   3  -2  15 19457.9 1232.08  34
   3   2  15 19484.0 1208.74  34
  -3  -2  15 20322.1 1207.69  13
   3  -2  15 18112.1 1902.56  29
  -3  -2  15 19646.2 1718.92  30
   3  -2  15 19171.1 1223.95  24
   3  -2  15 20090.6 1214.88  18
  -3  -2  16 9855.46 734.114  10
  -3   2  16 8326.24 1178.76  38
   3  -2  16 9092.02 728.699  34
  -3   2  16 8201.97 722.607  33
   3   2  16 9264.30 693.360  34
  -3  -2  16 7813.84 647.932  13
   3  -2  16 7773.20 1299.04  29
  -3  -2  16 9146.05 1142.53  30
  -3   2  16 9459.43 705.346  20
   3  -2  16 9456.30 734.492  24
   3  -2  16 9236.44 721.824  18
  -3  -2  17 13280.3 988.801  10
   3  -2  17 15539.4 1034.46  35
  -3   2  17 12857.6 1494.40  38
   3  -2  17 14167.8 1017.26  34
   3   2  17 15117.1 971.361  34
  -3   2  17 16701.9 1092.61  33
  -3  -2  17 14689.2 1003.03  14
  -3  -2  17 14644.6 940.519  13
   3  -2  17 14379.8 1769.22  29
  -3  -2  17 15281.2 1556.87  30
   3  -2  17 14674.9 1035.62  24
  -3   2  17 15121.0 1006.98  20
   3  -2  17 9186.42 1329.76  15
   3  -2  17 13861.6 1011.71  18
  -3  -2  18 13812.7 1025.80  10
  -3   2  18 13313.0 1532.86  38
   3  -2  18 15589.2 1059.07  35
  -3   2  18 15479.1 1108.84  33
   3   2  18 15083.2 983.900  34
   3  -2  18 14737.7 1056.12  34
  -3  -2  18 15419.5 1032.03  14
  -3  -2  18 14724.5 946.257  13
   3  -2  18 12425.2 1723.47  29
  -3  -2  18 12905.0 1454.70  30
  -3   2  18 15132.4 1055.36  20
   3  -2  18 15016.2 1075.23  24
   3  -2  18 13157.1 1030.43  18
  -3  -2  19 54828.8 3098.69  10
   3  -2  19 61447.1 3143.35  35
  -3   2  19 47983.3 3699.85  38
   3  -2  19 62142.2 3171.10  34
  -3   2  19 55860.5 3205.52  33
   3   2  19 58669.2 3030.66  34
  -3  -2  19 57183.7 2984.25  13
  -3  -2  19 53585.1 3058.63  14
  -3  -2  19 54722.8 3765.34  30
  -3   2  19 57793.8 3145.82  20
   3  -2  19 55985.2 3143.22  24
   3  -2  19 51515.1 3095.88  18
  -3  -2  20 23526.6 1513.44  10
   3  -2  20 22679.2 1465.32  35
  -3   2  20 23081.4 1419.85  34
  -3   2  20 19198.2 1929.72  38
  -3   2  20 22596.9 1602.51  33
   3   2  20 23402.2 1404.91  34
   3  -2  20 24565.8 1509.97  34
  -3  -2  20 24137.6 1368.96  13
  -3  -2  20 22522.5 1439.21  14
  -3  -2  20 22425.6 2049.04  30
   3  -2  20 25579.5 1586.93  24
  -3   2  20 21533.5 1461.46  20
   3  -2  20 24108.5 1548.42  18
  -3  -2  21 8797.45 777.944  10
   3  -2  21 10385.5 774.433  35
   3  -2  21 8816.74 768.964  34
  -3   2  21 8874.51 847.147  33
  -3   2  21 7819.03 679.687  34
   3   2  21 8735.07 691.401  34
  -3  -2  21 8397.62 638.674  13
  -3  -2  21 8419.90 1164.75  30
   3  -2  21 10221.6 843.924  24
  -3   2  21 8755.27 749.563  20
  -3   2  21 9037.43 766.374  19
   3  -2  21 8719.26 799.549  18
  -3  -2  22 7921.48 728.704  10
   3  -2  22 9342.13 730.810  35
   3  -2  22 9140.18 752.178  34
  -3   2  22 8399.51 818.561  33
  -3   2  22 8018.87 661.980  34
   3   2  22 8663.88 683.066  34
  -3  -2  22 8344.03 627.448  13
  -3  -2  22 8560.32 1161.48  30
   3  -2  22 8191.81 759.492  24
  -3   2  22 7321.75 682.232  20
  -3   2  22 10328.8 769.640  19
   3  -2  22 8761.17 767.040  18
  -3  -2  23 34960.6 2108.47  10
   3  -2  23 37995.3 2104.63  35
   3  -2  23 38621.9 2138.84  34
  -3   2  23 35116.3 2026.04  34
  -3   2  23 39519.4 2257.29  33
   3   2  23 38500.4 2074.67  34
  -3  -2  23 37461.5 2010.00  13
  -3  -2  23 31533.5 2670.61  30
   3  -2  23 40601.8 2176.46  24
  -3   2  23 34192.8 2065.37  20
  -3   2  23 36036.7 2095.58  19
   3  -2  23 33660.0 2101.66  18
  -3  -2  24 18045.6 1237.46  10
   3  -2  24 18835.9 1218.54  35
   3  -2  24 19697.6 1255.62  34
  -3   2  24 17842.1 1154.72  34
   3   2  24 20320.0 1214.97  34
  -3  -2  24 20774.7 1162.49  13
  -3  -2  24 18017.6 1800.79  30
   3  -2  24 19806.6 1271.16  24
  -3   2  24 18728.4 1212.84  19
   3  -2  24 17759.2 1237.24  18
  -3  -2  25 9343.04 773.340  10
   3  -2  25 10504.8 766.258  35
   3  -2  25 9734.83 775.592  34
   3   2  25 10158.0 745.068  34
  -3   2  25 9649.84 706.497  34
  -3  -2  25 11060.5 710.511  13
  -3  -2  25 10671.8 1282.93  30
  -3  -2  25 8695.94 666.143  24
   3  -2  25 12171.2 838.668  24
  -3   2  25 9698.69 738.504  19
   3  -2  25 10307.6 784.032  18
  -3  -2  26 856.669 288.523  10
   3  -2  26 626.417 232.081  35
  -3   2  26 771.372 211.898  34
   3   2  26 874.494 247.006  34
   3  -2  26 1035.31 285.683  34
  -3  -2  26 1063.54 209.204  13
  -3  -2  26 457.691 415.278  30
   3  -2  26 1035.35 303.420  24
  -3  -2  26 801.070 189.274  24
   3  -2  26 792.594 252.936  18
  -3   2  26 706.748 213.452  19
  -3  -2  27 269.086 223.959  10
   3  -2  27 309.033 199.729  35
  -3   2  27 130.751 146.330  34
   3   2  27 421.629 207.071  34
   3  -2  27-30.6735 207.694  34
  -3  -2  27 453.735 208.146  12
  -3  -2  27 302.484 144.958  13
  -3  -2  27-221.147 512.124  30
  -3  -2  27 212.574 135.154  24
   3  -2  27 251.737 239.555  24
   3  -2  27 594.479 213.844  18
  -3   2  27 466.545 180.906  19
   3  -2  28 1939.73 297.295  35
  -3   2  28 2336.09 280.131  34
   3   2  28 2319.22 327.106  34
  -3  -2  28 2521.04 338.377  12
  -3  -2  28 3366.51 387.168  10
  -3  -2  28 2340.17 268.376  13
  -3  -2  28 2539.58 648.437  30
   3  -2  28 1861.65 639.529  29
  -3   2  28 1906.93 599.934  30
   3  -2  28 2740.65 365.038  24
  -3  -2  28 2276.50 266.375  24
   3  -2  28 2588.05 339.663  18
  -3   2  28 2386.63 298.291  19
  -3   2  29 18712.3 1180.04  34
   3   2  29 22115.9 1268.70  34
   3  -2  29 21072.3 1246.26  35
  -3  -2  29 23086.2 1193.35  13
  -3  -2  29 23358.2 1291.85  10
  -3  -2  29 21632.5 1244.71  12
   3  -2  29 22726.7 1292.95  24
   3  -2  29 18958.8 1231.44  18
  -3   2  29 19991.7 1214.10  19
   3   2  30 13094.6 815.741  34
   3  -2  30 11744.9 782.051  35
   3   2  30 12554.2 804.546  35
  -3  -2  30 12272.0 787.454  12
  -3  -2  30 12164.4 807.190  10
   3  -2  30 12151.2 815.190  24
   3  -2  30 10642.4 773.123  18
   3   2  31 11776.3 772.682  34
   3   2  31 12302.0 776.741  35
   3  -2  31 11634.2 753.522  35
  -3  -2  31 11809.6 754.975  12
  -3  -2  31 12757.8 786.754  10
   3  -2  31 12681.4 796.199  24
   3  -2  31 10211.4 738.878  18
  -3  -2  32 1636.63 249.004  10
   3   2  32 1836.39 249.109  34
   3   2  32 1839.23 245.031  35
   3  -2  32 1497.31 213.833  35
  -3  -2  32 2024.73 248.529  12
   3  -2  32 1385.89 236.438  24
  -3  -2  32 1493.30 217.707  18
   3  -2  32 1686.20 224.780  18
   3   2  33 8155.23 563.942  34
   3  -2  33 8267.80 547.675  35
   3   2  33 8569.97 568.289  35
  -3  -2  33 9204.42 580.624  10
  -3  -2  33 9224.72 562.120  12
   3  -2  33 8606.52 581.159  24
  -3  -2  33 7885.54 551.379  18
   3  -2  33 7608.57 536.676  18
   3   2  34 6177.06 435.062  34
   3   2  34 6316.55 428.618  35
   3  -2  34 5222.17 395.283  35
  -3  -2  34 6042.73 427.069  10
  -3  -2  34 6683.24 420.104  12
   3  -2  34 6035.38 438.707  24
  -3  -2  34 5501.51 408.947  18
   3  -2  34 5621.54 397.327  18
   3   2  35 12494.7 719.385  34
   3   2  35 12728.8 718.513  35
  -3  -2  35 13342.3 718.482  10
   3  -2  35 12470.2 724.680  24
  -3  -2  35 10594.5 692.055  18
  -3  -2  36 5690.01 343.530  10
  -3   2  36 4431.11 306.004  12
   3   2  36 5311.93 346.588  34
   3  -2  36 4697.66 341.875  24
   3   2  36 4941.75 340.738  35
  -3  -2  37 2740.91 202.961  10
   3  -3 -35 593.838 92.2531   1
   3  -3 -34 3782.22 301.639  23
   3  -3 -34 4646.59 304.962   1
   3  -3 -33 6389.53 478.689  23
  -3   3 -33 7773.81 490.782  37
   3  -3 -33 7843.16 479.100   1
  -3   3 -32 38820.1 2102.05  37
   3  -3 -32 41492.4 2095.49   1
  -3   3 -31 13811.4 847.364  37
   3  -3 -31 13955.6 837.238   1
  -3  -3 -30 952.391 159.703  23
  -3   3 -30 1215.83 207.998  37
  -3   3 -29 10180.0 676.639  37
   3  -3 -29 10927.1 674.390   1
  -3   3 -28 36734.0 1914.70  37
   3  -3 -28 38096.4 1907.29   1
  -3  -3 -27 21237.8 1287.09  23
  -3   3 -27 24001.8 1382.50  37
   3  -3 -27 22577.7 1358.91   1
   3  -3 -26 37544.2 2102.80   1
  -3  -3 -26 36515.8 2028.62  23
   3  -3 -25 13772.1 931.505   1
  -3  -3 -25 10835.2 811.717  23
   3  -3 -24 2802.75 441.172   1
   3  -3 -24 2691.03 859.816  31
  -3  -3 -24 2940.39 375.171  23
   3  -3 -23 18537.0 1337.90   1
  -3  -3 -23 20553.6 1276.64  23
   3  -3 -23 21384.9 2352.73  31
   3  -3 -22 69106.9 3790.62  27
   3  -3 -22 69824.6 3879.75   1
  -3  -3 -22 73882.1 3787.03  23
   3  -3 -22 64722.0 5077.55  31
  -3   3 -22 68329.0 4790.02  32
   3  -3 -21 35356.3 2136.67  27
   3  -3 -21 34548.7 2205.85   1
  -3  -3 -21 37636.5 2105.80  23
   3  -3 -21 31847.1 3317.93  31
  -3   3 -21 32544.9 2992.12  32
   3  -3 -20 17253.0 1252.88  27
   3  -3 -20 16192.7 1359.67   1
  -3  -3 -20 18789.7 1243.68  23
   3  -3 -20 18532.6 2430.42  31
  -3   3 -20 17051.9 2011.63  32
   3  -3 -19 2942.49 458.685  27
   3  -3 -19 3111.20 552.024   1
  -3  -3 -19 2315.28 434.061  23
  -3   3 -19 4091.24 996.736  32
   3  -3 -19 2457.07 973.911  31
   3  -3 -18 24404.2 1536.35  27
   3  -3 -18 23158.6 1603.04   1
  -3  -3 -18 25629.1 1610.01  23
   3  -3 -18 22096.6 2527.17  31
  -3   3 -18 20269.3 2217.34  32
   3  -3 -17 16040.6 1078.53  27
   3  -3 -17 14397.5 1111.44   1
  -3  -3 -17 15182.7 1115.72  23
   3  -3 -17 12555.8 1812.07  31
  -3   3 -17 12859.4 1650.39  32
   3  -3 -16 84448.0 5270.56  31
  -3   3 -16 79058.8 4959.81  32
   3  -3 -16 80544.7 4080.61   1
   3  -3 -16 82094.5 4032.04  27
  -3  -3 -16 79056.9 4086.93  23
  -3  -3 -16 65842.7 3870.40   6
  -3   3 -15 49653.0 2704.45  37
   3  -3 -15 50618.1 3680.93  31
  -3   3 -15 52363.8 3526.57  32
   3  -3 -15 49345.2 2702.41   1
   3  -3 -15 50978.1 2680.09  27
  -3  -3 -15 48945.1 2723.05  23
  -3  -3 -15 43457.2 2573.05   6
  -3  -3 -14 22604.1 1453.01   6
  -3   3 -14 26920.0 1544.94  37
  -3  -3 -14 26712.6 1570.62  23
   3  -3 -14 23655.6 2442.93  15
   3  -3 -14 22352.9 2221.73  31
  -3   3 -14 26042.9 2182.44  32
  -3  -3 -13 28364.2 1751.15   6
  -3   3 -13 32464.2 2464.31  32
  -3   3 -13 33572.1 1803.19  37
   3  -3 -13 27995.9 1891.48  39
  -3  -3 -13 32021.6 1819.21  23
   3  -3 -13 28544.0 2831.74  15
  -3  -3 -12 89234.9 4911.73   7
  -3  -3 -12 88523.7 4850.32   6
  -3   3 -12 97917.0 5560.47  32
   3  -3 -12 92546.4 4991.02  39
  -3   3 -12 97151.8 4849.63  37
   3  -3 -12 96679.1 5577.94  28
  -3  -3 -12 98503.4 4886.87  23
  -3  -3 -12 94549.5 5800.19  15
   3  -3 -12 99827.5 6295.68  15
  -3  -3 -11 65965.8 3535.37   6
  -3  -3 -11 62322.7 3582.35   7
  -3   3 -11 64686.1 4068.85  32
  -3   3 -11 65733.8 3467.57  37
   3  -3 -11 67792.3 3666.49  39
   3  -3 -11 65286.4 3437.23  26
   3  -3 -11 67764.4 4135.38  28
  -3  -3 -11 68378.0 3506.19  23
  -3  -3 -11 69318.6 4485.27  15
  -3  -3 -10 53519.3 3055.28   7
  -3  -3 -10 57008.7 3031.83   6
  -3   3 -10 53958.6 2910.28  37
   3  -3 -10 56800.6 3147.70  39
  -3   3 -10 51004.9 3445.37  32
   3  -3 -10 54876.1 2889.51  26
   3  -3 -10 54974.4 3528.02  28
  -3  -3 -10 55331.2 2940.00  23
  -3  -3 -10 56894.3 3929.71  15
   3  -3  -9 7372.54 811.279  39
  -3   3  -9 7332.30 560.263  37
  -3   3  -9 5257.43 818.945  32
  -3  -3  -9 7060.01 1192.98  15
   3  -3  -9 7719.71 980.370  28
   3  -3  -9 7762.40 556.112  26
  -3  -3  -9 7370.75 588.701  23
  -3  -3  -9 5990.35 662.431   7
  -3  -3  -9 7231.24 638.428   6
  -3  -3  -8 15083.5 1148.88   7
  -3  -3  -8 16057.3 1065.66   6
  -3   3  -8 15390.7 963.905  37
   3  -3  -8 15183.7 1241.17  39
  -3   3  -8 14709.5 1374.54  32
   3  -3  -8 15032.4 950.557   1
   3  -3  -8 14715.3 1401.30  28
   3  -3  -8 15909.6 953.077  26
  -3  -3  -8 15580.5 984.720  23
  -3  -3  -8 16507.8 1822.46  15
  -3  -3  -8 15692.6 935.578  17
  -3  -3  -7 16432.3 1046.46   6
  -3  -3  -7 14536.4 1146.26   7
   3  -3  -7 14836.6 1248.22  39
  -3   3  -7 15796.8 949.296  37
  -3   3  -7 16289.4 1413.67  32
   3  -3  -7 14552.1 928.964   1
   3  -3  -7 15655.0 1415.27  28
   3  -3  -7 15708.9 939.605  26
  -3  -3  -7 14664.5 955.449  23
  -3  -3  -7 16772.4 1888.18  15
  -3  -3  -7 15122.9 914.474  17
  -3  -3  -6 128994. 6436.17   7
  -3  -3  -6 124152. 6222.26   6
  -3   3  -6 121162. 6117.36  37
   3  -3  -6 126635. 6479.66  39
  -3   3  -6 124860. 6683.02  32
   3  -3  -6 116472. 6096.83   1
   3  -3  -6 118352. 6720.04  28
   3  -3  -6 121479. 6111.57  26
  -3  -3  -6 122245. 6140.41  23
  -3  -3  -6 122209. 6090.51  17
  -3  -3  -6 126343. 7536.90  15
  -3  -3  -5 98702.0 4840.64   6
  -3   3  -5 90830.5 4729.35  37
   3  -3  -5 98534.8 5128.96  39
  -3   3  -5 97113.4 5283.21  32
   3  -3  -5 89128.9 4712.18   1
   3  -3  -5 91115.9 5327.71  28
   3  -3  -5 93939.1 4733.05  26
  -3  -3  -5 96298.8 4760.66  23
  -3  -3  -5 92959.2 4704.80  17
  -3  -3  -5 92693.6 6125.12  15
  -3   3  -4 108878. 6095.82  32
  -3   3  -4 112664. 5586.63  37
   3  -3  -4 115385. 6007.75  39
   3  -3  -4 106175. 6170.10  28
  -3  -3  -4 111917. 5605.86  23
  -3  -3  -4 109659. 5557.09  17
  -3  -3  -4 110616. 7110.97  15
  -3   3  -3 24183.4 1797.83  32
   3  -3  -3 25944.9 1842.38  39
  -3   3  -3 25285.9 1361.88  37
   3  -3  -3 24309.6 1866.62  28
   3  -3  -3 22516.4 1347.09  25
  -3  -3  -3 24448.8 1382.02  23
  -3  -3  -3 24123.8 1334.66  17
  -3  -3  -3 28701.4 2763.88  15
  -3   3  -2 35319.5 2347.55  32
   3  -3  -2 39123.1 2408.43  39
   3  -3  -2 33577.0 2405.66  28
   3  -3  -2 33436.2 1868.90  25
  -3  -3  -2 35794.2 1898.94  23
  -3  -3  -2 34670.7 1851.73  17
  -3  -3  -2 37588.9 3446.75  15
   3  -3  -1 35223.6 2482.16  28
   3  -3  -1 34643.6 1917.17  25
   3  -3  -1 40268.3 2491.25  39
  -3   3  -1 37312.1 2429.61  32
  -3  -3  -1 35994.1 1901.17  17
  -3  -3  -1 35373.5 3510.59  15
   3  -3   0 58849.2 3176.02  25
   3  -3   0 60799.0 3788.49  28
   3  -3   0 66653.7 3780.73  39
  -3   3   0 65487.3 3743.12  32
  -3  -3   0 62691.0 3163.57  17
  -3  -3   0 67747.7 5204.69  15
   3  -3   1 35312.3 1957.35  25
  -3  -3   1 37765.0 1943.51  17
   3  -3   2 35086.4 1891.44  25
  -3  -3   2 36710.5 1871.95  17
   3  -3   2 33744.0 1831.40  17
   3  -3   3 22330.7 1237.79  25
  -3   3   3 21110.7 1200.15  36
  -3  -3   3 22130.0 1209.38  17
   3  -3   3 20405.7 1170.64  17
  -3  -3   4 118071. 5879.88   9
   3  -3   4 118964. 5907.89  25
   3  -3   4 125747. 6325.68  39
  -3   3   4 114780. 5868.43  36
  -3  -3   4 116080. 5902.52  23
  -3  -3   4 124207. 5886.06  17
   3  -3   4 112159. 5837.53  17
  -3  -3   4 121333. 7538.39  15
  -3  -3   5 88948.6 4266.39   6
  -3  -3   5 84654.7 4202.65   9
  -3  -3   5 86345.2 4528.85   7
   3  -3   5 87740.2 4618.14  39
  -3   3   5 79853.7 4188.74  36
   3  -3   5 85624.1 4239.71  25
  -3  -3   5 80808.3 4225.19  23
   3  -3   5 76245.0 4157.37  17
  -3  -3   5 84706.9 4205.37  17
  -3  -3   5 85968.1 5691.70  15
  -3  -3   6 108377. 5277.56   9
  -3  -3   6 108301. 5575.20   7
  -3  -3   6 107299. 5323.65   6
  -3  -3   6 107225. 5266.19  10
  -3  -3   6 95871.2 5456.08  13
  -3   3   6 103593. 5263.92  36
   3  -3   6 113519. 5661.71  39
  -3  -3   6 99320.3 5293.23  23
  -3  -3   6 102125. 5220.89  18
   3  -3   6 102314. 5243.30  17
  -3  -3   6 110273. 5289.22  17
  -3  -3   6 108947. 6726.54  15
  -3   3   7 14083.4 846.359  36
   3  -3   7 15041.4 1207.96  39
  -3  -3   7 13615.3 1802.55  15
  -3  -3   7 13371.5 841.201  10
  -3  -3   7 13725.1 1017.34  13
  -3  -3   7 14017.0 848.696   9
  -3  -3   7 14377.2 1079.83   7
  -3  -3   7 14420.8 892.894   6
  -3  -3   7 12478.0 798.001  18
   3  -3   7 13437.8 827.732  17
  -3  -3   7 14292.4 863.259  17
  -3  -3   8 15182.5 920.133   4
   3  -3   8 15870.5 1234.13  39
  -3   3   8 15493.3 928.492  36
  -3  -3   8 14112.0 1065.12  13
  -3  -3   8 15756.5 934.808  10
  -3  -3   8 13631.8 882.067  18
  -3  -3   8 17091.5 962.323  17
  -3  -3   8 17439.8 1904.41  15
  -3  -3   8 15408.3 962.653   6
  -3  -3   8 16198.2 1155.89   7
  -3  -3   8 15228.4 926.909   9
  -3  -3   9 10773.0 690.888   9
  -3  -3   9 9484.62 822.030   7
  -3  -3   9 10396.1 707.726   6
  -3  -3   9 9566.93 666.145   4
  -3   3   9 10839.7 683.818  36
   3  -3   9 9351.47 933.523  39
  -3  -3   9 9270.79 793.545  13
  -3  -3   9 10704.0 1499.82  15
  -3  -3   9 10007.4 683.329  10
  -3  -3   9 9461.43 650.432  12
   3  -3   9 9833.48 702.800  24
  -3  -3   9 9684.92 645.490  18
   3  -3   9 9754.33 685.861  18
  -3  -3   9 11678.5 720.093  17
  -3  -3  10 58535.8 2928.58   9
  -3  -3  10 59741.6 2964.66   6
  -3  -3  10 57931.3 3115.87   7
  -3  -3  10 53052.5 2904.60   4
  -3   3  10 56194.5 2915.66  36
   3  -3  10 54319.0 2932.98  35
   3  -3  10 57058.5 3173.59  39
  -3  -3  10 56883.2 3050.39  13
  -3  -3  10 55142.2 2919.26  10
  -3  -3  10 53889.8 2878.82  12
   3  -3  10 54314.7 2943.41  24
  -3  -3  10 53178.3 2879.53  18
   3  -3  10 58267.2 2936.86  18
  -3  -3  10 59043.1 3962.80  15
  -3  -3  11 73439.9 3565.66   6
  -3  -3  11 66060.2 3521.16   9
  -3  -3  11 68468.2 3677.38   7
  -3  -3  11 63015.6 3509.87   4
   3  -3  11 67576.3 3548.46  35
  -3   3  11 66609.8 3516.30  36
   3  -3  11 72233.7 3766.12  39
  -3  -3  11 71582.3 3542.61  10
  -3  -3  11 68872.6 3490.30  12
   3  -3  11 67280.3 3555.60  24
  -3  -3  11 65831.8 3486.68  18
   3  -3  11 69441.7 3540.00  18
  -3  -3  11 66715.9 4449.68  15
  -3  -3  12 92970.0 4591.39   6
  -3  -3  12 85152.7 4673.12   7
  -3  -3  12 91313.2 4576.60   9
  -3  -3  12 85042.4 4560.25   4
  -3   3  12 88994.6 4560.98  36
   3  -3  12 90554.3 4762.96  39
   3  -3  12 87958.1 4588.28  35
  -3   3  12 82439.4 5475.40  38
  -3  -3  12 91650.2 4579.37  10
  -3  -3  12 89804.4 4526.34  12
   3  -3  12 90473.7 4608.10  24
  -3  -3  12 88273.7 4530.87  18
  -3  -3  12 93789.8 5532.58  15
   3  -3  12 88431.9 4579.25  18
  -3  -3  13 28677.0 1594.42   6
  -3  -3  13 26827.5 1663.32   7
  -3  -3  13 28940.9 1597.83   9
  -3  -3  13 25252.4 1566.40   4
  -3  -3  13 27594.7 1588.59  10
  -3  -3  13 28074.2 1549.72  12
  -3  -3  13 28274.8 1644.95  13
   3   3  13 27573.4 1660.56  34
  -3   3  13 25511.7 2354.58  38
  -3   3  13 27937.7 1582.98  36
   3  -3  13 28311.4 1610.91  35
   3  -3  13 22828.2 1705.43  39
   3  -3  13 29581.7 1641.07  24
  -3  -3  13 26670.6 1545.34  18
   3  -3  13 29654.1 1619.13  18
  -3  -3  13 23378.0 2213.47  15
   3  -3  13 24692.4 2606.23  15
  -3  -3  14 26780.7 1706.70   7
  -3  -3  14 28588.7 1658.29   6
  -3  -3  14 30230.6 1684.19   9
  -3   3  14 30215.9 1676.41  36
   3   3  14 28246.4 1721.17  34
   3  -3  14 29012.1 1693.54  35
  -3   3  14 30153.2 2512.18  38
  -3  -3  14 29177.8 1687.81  14
  -3  -3  14 29211.9 1706.43  13
  -3  -3  14 28426.8 1674.91  10
  -3  -3  14 28777.4 1624.21  12
   3  -3  14 30884.5 1730.96  24
  -3  -3  14 27641.5 1628.10  18
   3  -3  14 30807.3 1711.77  18
   3  -3  14 22213.3 2549.63  15
  -3  -3  15 38970.4 2183.63   9
  -3  -3  15 37850.3 2151.10   6
  -3   3  15 40297.1 2306.84  33
   3   3  15 37937.3 2211.22  34
   3  -3  15 39138.0 2202.55  35
  -3   3  15 35694.6 2971.52  38
  -3  -3  15 40173.8 2199.48  13
  -3  -3  15 40665.8 2199.19  10
  -3  -3  15 39106.7 2198.93  14
  -3  -3  15 37736.2 2123.37  12
   3  -3  15 40029.0 2235.28  24
  -3  -3  15 39116.6 2145.00  18
   3  -3  15 40459.2 2224.94  18
   3  -3  15 33174.3 3104.71  15
  -3  -3  16 57953.6 3176.90   9
   3  -3  16 62122.5 3213.51  35
  -3   3  16 51541.3 3956.87  38
  -3  -3  16 60054.9 3173.91  13
  -3  -3  16 58106.7 3117.78  12
  -3  -3  16 53823.8 3166.27  14
  -3   3  16 59306.3 3309.11  33
   3   3  16 58203.0 3193.40  34
   3  -3  16 63502.3 3267.44  24
  -3  -3  16 62157.8 3151.22  18
   3  -3  16 63414.3 3245.43  18
   3  -3  16 46928.9 4032.09  15
   3  -3  17 12516.1 951.121  35
  -3   3  17 10548.9 1422.98  38
  -3  -3  17 14721.3 936.923  13
  -3  -3  17 12561.9 897.756  12
  -3  -3  17 12049.5 924.922  14
  -3   3  17 14745.6 1091.86  33
   3   3  17 14013.4 966.567  34
   3  -3  17 14750.4 1043.83  24
  -3  -3  17 13252.4 920.304  18
   3  -3  17 13007.9 999.666  18
   3  -3  18 25301.2 1560.90  35
  -3   3  18 21143.5 2131.83  38
  -3  -3  18 26578.7 1505.59  13
  -3  -3  18 24307.7 1546.03  14
  -3  -3  18 23522.5 1477.11  12
   3   3  18 25671.9 1530.67  34
  -3   3  18 24236.6 1672.75  33
   3  -3  18 28757.2 1660.60  24
   3  -3  18 24172.1 1599.68  18
  -3  -3  18 24697.5 1507.30  18
   3  -3  19 5863.22 590.643  35
  -3  -3  19 5183.11 554.739  14
  -3  -3  19 5185.91 489.384  13
  -3  -3  19 4620.70 486.085  12
   3   3  19 4250.58 495.097  34
   3  -3  19 4892.53 627.818  24
  -3  -3  19 4776.59 517.976  18
   3  -3  19 4352.10 574.571  18
   3  -3  20 22263.0 1387.49  35
  -3  -3  20 21517.7 1288.25  13
  -3  -3  20 20710.6 1376.65  14
  -3  -3  20 18655.4 1299.89  12
  -3   3  20 20993.6 1559.71  33
   3   3  20 20257.8 1318.17  34
   3  -3  20 23961.4 1504.34  24
  -3  -3  20 22484.4 1361.73  18
   3  -3  20 20813.5 1451.51  18
  -3   3  21 32522.7 2032.36  34
   3  -3  21 33253.0 2029.53  35
  -3  -3  21 37090.7 1978.85  13
  -3  -3  21 35097.9 2012.55  12
  -3  -3  21 32988.1 2040.61  14
   3   3  21 34576.0 2000.90  34
  -3   3  21 38469.9 2085.12  19
   3  -3  21 40963.5 2228.15  24
  -3  -3  21 34849.5 2032.11  18
   3  -3  21 33676.3 2140.49  18
   3  -3  22 62997.5 3418.81  35
  -3   3  22 58880.2 3403.70  34
   3   3  22 64738.7 3401.63  34
  -3  -3  22 64456.8 3395.95  12
  -3  -3  22 68183.4 3369.65  13
   3  -3  22 71636.2 3580.19  24
  -3   3  22 58480.6 3394.58  19
  -3  -3  22 63671.3 3417.52  18
   3  -3  22 64035.0 3514.62  18
   3  -3  23 15449.3 1037.26  35
  -3   3  23 14559.2 1026.11  34
   3   3  23 15123.5 1011.11  34
  -3  -3  23 16396.6 985.740  13
  -3  -3  23 15346.3 1013.62  12
  -3   3  23 12527.8 1727.08  30
   3  -3  23 16983.9 1155.21  24
  -3  -3  23 14521.8 1029.59  18
   3  -3  23 14705.2 1091.45  18
  -3   3  23 14882.9 1011.61  19
   3  -3  24 4386.46 458.291  35
  -3   3  24 4154.10 451.029  34
   3   3  24 4214.81 442.578  34
  -3  -3  24 4541.03 417.489  13
  -3  -3  24 3844.50 424.799  12
  -3   3  24 3464.78 896.062  30
   3  -3  24 3941.97 521.585  24
  -3  -3  24 4229.93 467.605  18
   3  -3  24 4462.72 508.696  18
  -3   3  24 4288.82 426.301  19
   3  -3  25 9792.22 698.364  35
  -3   3  25 9134.50 680.442  34
   3   3  25 8561.48 670.156  34
  -3  -3  25 9409.19 677.491  12
  -3  -3  25 10159.2 660.065  13
  -3   3  25 8571.30 1302.40  30
   3  -3  25 9317.59 764.263  24
  -3  -3  25 8383.62 683.911  18
   3  -3  25 9138.81 734.227  18
  -3   3  25 7617.74 625.348  19
  -3   3  26 31096.7 1797.89  34
   3   3  26 32098.1 1824.34  34
   3  -3  26 30373.4 1803.20  35
  -3  -3  26 35280.6 1797.68  13
  -3  -3  26 33227.6 1801.83  12
   3  -3  26 34004.9 1901.60  24
  -3  -3  26 31431.5 1824.95  18
   3  -3  26 33545.2 1866.16  18
   3   3  27 22151.0 1298.09  34
  -3   3  27 21023.5 1261.73  34
   3  -3  27 21407.9 1272.90  35
  -3  -3  27 22332.3 1263.64  12
  -3  -3  27 23114.6 1254.49  13
   3  -3  27 22343.6 1349.26  24
  -3  -3  27 21785.3 1294.61  18
   3  -3  27 21435.3 1308.28  18
  -3   3  28 30851.8 1804.94  34
   3   3  28 34893.6 1860.38  34
   3  -3  28 32356.2 1820.58  35
  -3  -3  28 37243.1 1817.64  13
   3  -3  28 35038.8 1903.40  24
  -3  -3  28 32753.1 1842.32  18
   3  -3  28 33770.1 1860.70  18
  -3  -3  29 9879.04 579.694  13
  -3  -3  29 8161.41 599.143  18
   3  -3  29 7992.74 605.009  18
   3  -3  29 9891.73 664.623  24
  -3   3  29 8299.46 575.141  34
   3   3  29 8331.09 610.638  34
   3   3  30 1533.46 227.963  34
   3   3  30 1551.58 234.356  35
  -3  -3  30 1692.87 190.934  13
   3  -3  30 1536.51 250.024  24
  -3  -3  30 1726.05 229.897  18
   3  -3  30 1647.46 228.942  18
   3   3  31 10407.0 663.381  34
   3   3  31 10392.3 662.617  35
  -3  -3  31 11421.7 676.360  10
   3  -3  31 10963.5 692.198  24
  -3  -3  31 9439.26 636.539  18
   3  -3  31 10014.1 646.343  18
   3   3  32 27446.1 1394.64  34
   3   3  32 28632.2 1401.94  35
  -3  -3  32 29377.3 1401.41  10
   3  -3  32 27226.3 1410.96  24
  -3  -3  32 24268.4 1360.82  18
   3  -3  32 24406.6 1360.03  18
  -3  -3  32 21383.3 1354.74  17
   3   3  33 5344.67 380.568  34
   3   3  33 5159.57 383.465  35
  -3  -3  33 5907.88 387.944  10
  -3  -3  34 6266.99 399.783  10
  -3  -3  35 938.453 115.400  10
   3  -4 -32 5030.72 318.825   1
   3  -4 -31 16621.8 902.635   1
   3  -4 -30 24193.1 1431.37  23
   3  -4 -30 30211.0 1443.35   1
   3  -4 -29 35497.6 1834.76  23
  -3   4 -29 35045.5 1802.02  37
   3  -4 -29 38560.6 1832.22   1
   3  -4 -28 7066.89 522.301  23
  -3  -4 -28 6842.85 485.264  23
  -3   4 -28 7618.47 509.106  37
   3  -4 -28 7921.16 525.579   1
  -3   4 -27 3485.52 337.371  37
   3  -4 -27 3628.25 357.194  23
  -3  -4 -27 3809.58 333.317  23
  -3   4 -26 4222.38 378.553  37
  -3  -4 -26 2989.26 270.535   9
  -3  -4 -26 3668.14 348.994  23
   3  -4 -26 3915.40 383.235  23
   3  -4 -25 28292.5 1629.09  23
  -3  -4 -25 27661.4 1597.63  23
  -3   4 -25 29834.7 1636.26  37
  -3  -4 -24 21322.1 1297.50  23
  -3   4 -24 22447.6 1343.99  37
  -3  -4 -23 59466.6 3129.12  23
  -3   4 -23 57635.4 3156.66  37
  -3  -4 -22 24767.6 1473.89  23
  -3   4 -22 24381.2 1502.67  37
   3  -4 -22 22399.0 1488.63  27
  -3  -4 -21 15456.8 1089.24  23
  -3   4 -21 16484.1 1142.65  37
   3  -4 -21 16529.9 1158.94  27
   3  -4 -20 37772.9 3650.88  31
  -3  -4 -20 46715.5 2605.37  23
  -3   4 -20 47812.0 2655.28  37
   3  -4 -20 44922.7 2656.44  27
   3  -4 -19 56801.0 4749.03  31
   3  -4 -19 60446.2 3348.22  27
  -3  -4 -19 62451.1 3333.95  23
  -3   4 -19 57314.8 3304.81  37
   3  -4 -18 14410.1 2156.96  31
   3  -4 -18 17866.0 1277.12   1
   3  -4 -18 17452.0 1275.89  27
  -3  -4 -18 20743.3 1327.16  23
  -3   4 -18 16807.6 1227.47  37
   3  -4 -17 18747.1 2418.83  31
   3  -4 -17 24574.9 1515.75   1
   3  -4 -17 22053.7 1497.92  27
  -3  -4 -17 24267.0 1539.29  23
  -3   4 -17 20899.1 1452.58  37
  -3   4 -16 4139.29 502.793  37
   3  -4 -16 5379.62 1228.19  31
   3  -4 -16 3943.28 508.423   1
   3  -4 -16 3406.86 506.773  27
  -3  -4 -16 3481.51 520.277  23
  -3  -4 -16 3483.34 365.489   6
  -3   4 -15 22273.4 1371.56  37
   3  -4 -15 20761.4 2340.16  31
   3  -4 -15 21669.5 1368.91   1
   3  -4 -15 20418.5 1378.50  27
  -3  -4 -15 22197.7 1421.33  23
  -3  -4 -15 18688.0 1228.24   6
  -3   4 -14 43847.4 2362.56  37
   3  -4 -14 41386.1 3481.48  31
   3  -4 -14 40190.2 2330.45   1
   3  -4 -14 42048.7 2389.10  27
  -3  -4 -14 43042.3 2412.38  23
  -3  -4 -14 38302.2 2249.83   6
  -3  -4 -13 145765. 7793.52   6
  -3   4 -13 161104. 7863.89  37
   3  -4 -13 150467. 9041.31  31
   3  -4 -13 155968. 7845.35   1
   3  -4 -13 159023. 7913.14  27
  -3  -4 -13 162195. 7926.20  23
  -3  -4 -13 151449. 8907.18  15
   3  -4 -13 131471. 9292.87  15
  -3  -4 -12 52788.6 3020.15   6
   3  -4 -12 59138.3 3043.62   1
  -3   4 -12 56327.9 3041.86  37
   3  -4 -12 60099.0 4163.85  31
  -3  -4 -12 57256.3 3102.50  23
  -3  -4 -12 55826.3 4077.43  15
   3  -4 -12 46671.6 4388.51  15
  -3  -4 -11 7020.45 692.035   7
  -3  -4 -11 6329.82 606.700   6
   3  -4 -11 7049.39 595.358   1
  -3   4 -11 7053.89 602.926  37
   3  -4 -11 6679.40 1198.62  31
  -3  -4 -11 7367.37 1274.92  15
   3  -4 -11 5432.02 988.795  28
  -3  -4 -11 7260.42 652.455  23
   3  -4 -11 6231.58 1637.01  15
  -3  -4 -10 25030.5 1721.04   7
  -3  -4 -10 25708.4 1652.68   6
   3  -4 -10 28934.8 1599.65   1
  -3   4 -10 27722.6 1603.16  37
   3  -4 -10 26805.0 1604.54  26
   3  -4 -10 28583.4 2384.93  28
   3  -4 -10 26782.0 1571.56  23
  -3  -4 -10 28200.5 1651.76  23
  -3  -4 -10 23150.8 2457.74  15
   3  -4 -10 26664.8 3078.32  15
  -3  -4  -9 48866.0 2744.67   6
  -3  -4  -9 50744.7 2838.15   7
   3  -4  -9 48816.7 2614.19   1
  -3   4  -9 49926.9 2636.30  37
   3  -4  -9 46054.4 3401.67  28
   3  -4  -9 51090.8 2657.22  26
   3  -4  -9 44068.0 2570.05  23
  -3  -4  -9 48651.8 2670.24  23
   3  -4  -9 44815.0 4280.27  15
  -3  -4  -9 49205.8 3828.29  15
  -3  -4  -8 41115.0 2206.35  17
   3  -4  -8 32666.8 3732.63  15
  -3  -4  -8 37644.6 3329.82  15
   3  -4  -8 43971.4 2267.56  26
   3  -4  -8 37831.5 2951.20  28
   3  -4  -8 42320.6 2218.90   1
   3  -4  -8 36197.1 2155.55  23
  -3  -4  -8 42150.0 2273.52  23
  -3  -4  -8 40654.1 2437.85   7
  -3  -4  -8 39540.9 2349.52   6
  -3  -4  -7 97119.5 4780.60  17
   3  -4  -7 91789.4 6940.33  15
  -3  -4  -7 95274.7 6251.44  15
   3  -4  -7 91080.1 5652.33  28
   3  -4  -7 102916. 4841.85  26
   3  -4  -7 95105.9 4778.59   1
   3  -4  -7 83322.7 4711.75  23
  -3  -4  -7 99193.2 5072.64   7
  -3  -4  -7 90774.7 4925.94   6
  -3  -4  -6 26456.9 2671.26  15
   3  -4  -6 21790.0 3058.14  15
  -3  -4  -6 27750.5 1479.42  17
   3  -4  -6 25487.2 1463.88   1
   3  -4  -6 26294.9 2216.95  28
   3  -4  -6 26540.6 1514.73  26
   3  -4  -6 21362.3 1391.41  23
  -3  -4  -6 25381.1 1604.59   6
  -3  -4  -6 28762.5 1531.38   9
  -3  -4  -6 26165.4 1740.24   7
  -3  -4  -5 11989.6 1846.87  15
   3  -4  -5 12754.3 1489.05  28
   3  -4  -5 13578.5 923.993  26
   3  -4  -5 13184.1 884.376   1
  -3  -4  -5 14873.3 931.975   9
  -3  -4  -5 12297.2 1113.66   7
  -3  -4  -5 13562.4 1002.54   6
   3  -4  -5 13869.4 2471.81  15
  -3  -4  -5 14546.3 892.553  17
   3  -4  -5 13802.5 863.612  17
   3  -4  -4 59868.2 3519.37  39
   3  -4  -4 54572.6 3778.79  28
   3  -4  -4 57859.9 3019.02  26
   3  -4  -4 54409.3 2953.74   1
  -3  -4  -4 58952.0 3010.56   9
  -3  -4  -4 56045.8 3307.33   7
  -3  -4  -4 53482.2 3091.00   6
  -3  -4  -4 57546.9 2970.68  17
   3  -4  -4 45603.4 4943.56  15
  -3  -4  -4 55147.2 4501.19  15
   3  -4  -4 56397.3 2934.89  17
   3  -4  -3 165827. 8255.33  39
   3  -4  -3 141146. 7577.07   1
   3  -4  -3 155016. 8574.56  28
   3  -4  -3 158393. 7671.99  26
  -3  -4  -3 148634. 7980.14   7
  -3  -4  -3 160170. 7646.82   9
  -3  -4  -3 148777. 7737.37   6
  -3  -4  -3 154684. 7606.58  17
  -3  -4  -3 149343. 9441.21  15
   3  -4  -3 150155. 7564.64  17
   3  -4  -3 142149. 10382.9  15
  -3  -4  -2 50711.1 2812.82  10
   3  -4  -2 51414.6 2843.31   1
   3  -4  -2 54336.4 3719.91  28
   3  -4  -2 55085.8 2922.35  26
  -3  -4  -2 56418.5 2873.37  17
   3  -4  -2 54143.6 2827.73  17
  -3  -4  -2 59760.0 4706.40  15
   3  -4  -2 50551.1 5288.34  15
  -3  -4  -2 54944.6 3261.22   7
  -3  -4  -2 55353.3 2895.64   9
  -3  -4  -2 54206.6 2990.16   6
  -3  -4  -1 36298.1 2046.53   6
  -3  -4  -1 35640.1 2319.38   7
  -3  -4  -1 37601.4 1960.53   9
  -3   4  -1 32652.4 1909.41  36
   3  -4  -1 45630.9 2757.50  39
  -3  -4  -1 31549.9 1866.79  10
   3  -4  -1 32900.0 1896.61   1
   3  -4  -1 41065.4 2860.74  28
   3  -4  -1 38878.8 2004.77  26
  -3  -4  -1 36291.6 1971.42  23
  -3  -4  -1 36066.7 1930.20  17
   3  -4  -1 34543.6 1883.46  17
  -3  -4  -1 28704.8 3335.33  15
   3  -4  -1 28715.8 4091.91  15
  -3  -4   0 4726.48 684.009   7
  -3  -4   0 4924.98 499.923   6
  -3  -4   0 4681.20 422.735   9
  -3   4   0 4996.86 424.076  36
  -3  -4   0 4070.45 1475.35  15
  -3  -4   0 3991.46 381.101  11
  -3  -4   0 4353.53 461.583  13
  -3  -4   0 3796.36 373.280  10
  -3  -4   0 4747.40 403.512   4
   3  -4   0 5050.12 924.988  28
   3  -4   0 4625.85 446.208  25
  -3  -4   0 5020.89 460.562  23
   3  -4   0 2724.98 1854.42  15
  -3  -4   0 4771.36 413.059  17
   3  -4   0 4649.82 383.968  17
  -3  -4   1 27380.8 1556.31   9
  -3  -4   1 28131.1 1649.59   6
  -3   4   1 28514.5 1547.22  36
  -3  -4   1 23868.0 1590.25  13
  -3  -4   1 26263.9 1501.35  11
  -3  -4   1 27097.1 1503.91  10
  -3  -4   1 27776.5 1531.59   4
   3  -4   1 29227.0 1599.28  25
   3  -4   1 25418.5 2299.14  28
  -3  -4   1 29144.7 1589.91  23
   3  -4   1 24609.0 3776.96  15
  -3  -4   1 26795.8 1538.89  17
   3  -4   1 25617.8 1494.59  17
  -3  -4   2 69160.2 3650.29   6
  -3  -4   2 71378.6 3571.89   9
  -3   4   2 66861.7 3535.63  36
  -3  -4   2 66964.9 3502.53  11
  -3  -4   2 62558.2 3628.84  13
  -3  -4   2 67082.0 3503.24  10
  -3  -4   2 69220.4 3535.27   4
   3  -4   2 69764.7 4509.94  28
   3  -4   2 70114.4 3594.56  25
  -3  -4   2 68499.8 3578.69  23
  -3  -4   2 70496.6 3557.79  17
   3  -4   2 68509.9 3512.88  17
  -3  -4   3 176748. 8380.30   9
  -3  -4   3 167162. 8725.33   7
  -3   4   3 166780. 8340.80  36
  -3  -4   3 162971. 8302.97  11
  -3  -4   3 154591. 8463.87  13
  -3  -4   3 161322. 8305.12  10
  -3  -4   3 167524. 8337.86   4
   3  -4   3 171928. 8405.72  25
   3  -4   3 183729. 9520.16  28
  -3  -4   3 168871. 8386.78  23
  -3  -4   3 175544. 8371.53  17
   3  -4   3 165495. 8314.72  17
  -3  -4   4 54842.6 2919.02   9
  -3  -4   4 54850.8 3223.57   7
  -3   4   4 53391.8 2888.21  36
  -3  -4   4 53263.8 2857.70  11
  -3  -4   4 50924.7 3040.35  13
  -3  -4   4 52699.8 2863.32  10
  -3  -4   4 56967.6 2900.16   4
   3  -4   4 56336.0 2959.30  25
   3  -4   4 60085.9 3940.99  28
  -3  -4   4 55179.6 2936.91  23
  -3  -4   4 57756.4 2924.63  17
   3  -4   4 57315.5 2881.30  17
  -3  -4   4 55426.1 4448.67  15
  -3  -4   5 7888.46 796.442   7
  -3   4   5 7516.44 552.802  36
   3  -4   5 7404.64 1145.77  39
  -3  -4   5 6783.25 525.052  11
  -3  -4   5 6127.88 689.286  13
  -3  -4   5 6745.86 525.018  10
  -3  -4   5 6467.36 1391.00  15
  -3  -4   5 7197.23 545.133   4
   3  -4   5 6559.98 1115.61  28
   3  -4   5 7600.95 604.670  25
  -3  -4   5 6588.33 570.534  23
  -3  -4   5 7473.07 566.534  17
   3  -4   5 6655.04 523.853  17
   3  -4   5 8537.20 2030.41  15
   3  -4   6 18797.4 1160.42   4
  -3  -4   6 19637.2 1179.47   4
  -3  -4   6 17798.0 1311.26  13
  -3  -4   6 18699.3 1144.55  11
  -3  -4   6 18661.5 1154.27  10
  -3   4   6 21066.2 1190.71  36
   3  -4   6 20850.4 1253.66  25
  -3  -4   6 20388.5 1276.74   6
  -3  -4   6 21933.4 1462.23   7
  -3  -4   6 20801.1 1210.24  17
   3  -4   6 19537.7 1163.43  17
   3  -4   6 21607.1 2994.24  15
  -3  -4   6 17818.6 2238.85  15
   3  -4   7 82942.8 4092.63   4
  -3  -4   7 78254.3 4096.14   4
  -3  -4   7 78669.7 4057.44  11
  -3  -4   7 79949.8 4078.06  10
  -3  -4   7 69747.3 4213.09  13
  -3   4   7 79412.4 4093.65  36
   3  -4   7 84343.9 4185.88  25
  -3  -4   7 84061.6 4387.75   7
  -3  -4   7 84306.9 4217.14   6
  -3  -4   7 83048.3 4137.61  17
   3  -4   7 73061.0 4062.77  17
  -3  -4   7 83127.5 5553.40  15
   3  -4   7 74697.5 6383.16  15
  -3  -4   8 28451.9 1587.78   4
   3  -4   8 28482.7 1578.79   4
  -3  -4   8 25330.4 1686.62  13
  -3  -4   8 26022.6 1537.38  11
  -3  -4   8 27531.9 1563.26  10
  -3   4   8 26296.6 1569.15  36
   3  -4   8 31448.7 1686.38  25
  -3  -4   8 27538.2 1788.89   7
  -3  -4   8 30423.7 1693.78   6
  -3  -4   8 29374.9 1621.15  17
   3  -4   8 25788.9 1554.72  17
   3  -4   8 24116.1 3097.21  15
  -3  -4   8 26017.4 2652.92  15
  -3  -4   9 66026.5 3472.02   4
   3  -4   9 66983.2 3465.94   4
  -3  -4   9 65131.3 3421.38  11
  -3  -4   9 58418.3 3553.17  13
  -3  -4   9 67611.1 3456.00  10
  -3   4   9 66821.3 3471.61  36
   3  -4   9 73273.1 3576.59  25
  -3  -4   9 72381.2 3588.67   6
  -3  -4   9 65975.7 3493.64   9
  -3  -4   9 67989.0 3695.75   7
  -3  -4   9 68541.1 3508.51  17
   3  -4   9 60783.7 3440.42  17
   3  -4   9 69628.4 5458.06  15
  -3  -4   9 62666.6 4638.31  15
   3  -4  10 26421.9 1609.69   4
  -3  -4  10 27145.2 1618.77   4
  -3  -4  10 30073.6 1739.19  13
  -3  -4  10 26582.8 1572.04  11
  -3  -4  10 29481.7 1618.04  10
  -3   4  10 28808.2 1630.13  36
   3  -4  10 30604.7 1715.92  25
  -3  -4  10 28120.7 1792.30   7
  -3  -4  10 27984.9 1645.66   9
  -3  -4  10 31105.1 1730.28   6
   3  -4  10 26517.5 1600.78  17
  -3  -4  10 29925.6 1659.85  17
   3  -4  10 23357.1 2918.90  15
  -3  -4  10 26361.4 2591.44  15
  -3  -4  11 3367.37 383.142   4
  -3  -4  11 3612.67 353.011  11
  -3  -4  11 3875.91 1000.13  15
  -3  -4  11 2925.12 437.566  13
  -3   4  11 3520.75 396.903  36
   3  -4  11 3984.63 469.567  25
  -3  -4  11 3724.32 402.620   9
  -3  -4  11 2905.55 443.795   7
  -3  -4  11 3092.99 377.529  10
  -3  -4  11 3577.19 432.800   6
   3  -4  11 3425.22 384.899  17
  -3  -4  11 3706.32 405.494  17
   3  -4  11 3287.25 1232.12  15
  -3  -4  12 61301.0 3293.74   4
  -3  -4  12 63628.3 3277.76  10
  -3  -4  12 61369.4 3348.70  13
  -3  -4  12 59287.2 3222.93  11
  -3   4  12 61982.3 3295.82  36
   3  -4  12 66105.1 3395.85  25
  -3  -4  12 68189.7 3377.33   6
  -3  -4  12 64492.5 3333.75   9
  -3  -4  12 56374.3 4226.29  15
   3  -4  12 58169.2 3275.76  17
  -3  -4  12 61574.5 3326.56  17
   3  -4  12 54701.9 4741.23  15
  -3  -4  13 127390. 6958.32   4
  -3   4  13 121851. 8019.75  38
  -3  -4  13 142459. 6956.42  10
  -3  -4  13 126017. 6883.13  11
  -3  -4  13 141960. 7000.80  14
   3  -4  13 156269. 7109.79  25
  -3  -4  13 142958. 7036.85   6
  -3  -4  13 141787. 7018.33   9
  -3  -4  13 133884. 7998.73  15
   3  -4  13 134746. 6968.85  17
  -3  -4  13 143678. 7015.22  17
   3  -4  13 130053. 8532.72  15
   3   4  14 41929.6 2421.01  34
  -3   4  14 42612.2 3390.94  38
  -3   4  14 47248.3 2577.69  33
  -3  -4  14 38317.6 2277.89  11
  -3  -4  14 46093.8 2367.68  10
  -3  -4  14 42988.2 2384.88  14
   3  -4  14 41668.7 2442.61  25
  -3  -4  14 44350.2 2409.65   9
  -3  -4  14 44277.6 2331.22  18
   3  -4  14 40201.7 2359.01  17
  -3  -4  14 43939.4 2406.46  17
   3  -4  14 33635.5 3461.52  15
   3   4  15 12534.8 902.303  34
  -3   4  15 9378.14 1381.72  38
  -3  -4  15 12818.3 874.142  14
  -3  -4  15 9325.72 743.466  11
  -3  -4  15 12781.6 847.596  10
  -3   4  15 12308.4 1008.08  33
  -3  -4  15 11759.1 863.313   9
  -3  -4  15 11281.6 806.595  18
   3  -4  15 10277.1 831.670  17
  -3  -4  15 11989.7 870.069  17
   3  -4  15 9471.47 1594.28  15
  -3   4  16 1257.62 550.687  38
  -3  -4  16 1127.48 283.246  13
  -3  -4  16 1335.53 293.928  14
   3   4  16 1557.05 342.746  34
  -3   4  16 2021.59 427.909  33
  -3  -4  16 1314.48 307.947  10
  -3  -4  16 1561.33 303.289  18
   3  -4  16 887.193 385.420  16
   3  -4  16 940.723 256.603  17
  -3  -4  16 1197.92 288.953  17
  -3  -4  17 20496.7 1207.75  18
   3  -4  17 16995.6 1225.31  17
  -3  -4  17 16727.6 1216.41  17
  -3   4  17 20498.2 1440.17  33
   3   4  17 19011.6 1227.65  34
  -3  -4  17 18899.1 1215.33  10
  -3  -4  17 18794.9 1189.85  13
  -3  -4  17 18387.0 1227.31  14
  -3  -4  18 10734.7 815.845  18
   3  -4  18 10014.5 857.744  17
  -3  -4  18 11586.6 893.647  17
  -3   4  18 12945.8 1077.43  33
   3   4  18 11883.5 859.301  34
  -3  -4  18 11656.4 824.658  13
  -3  -4  18 11004.5 848.080  10
  -3  -4  18 11516.9 864.701  14
  -3  -4  19 65424.1 3557.16  18
   3  -4  19 57320.6 3593.33  17
  -3  -4  19 63946.7 3621.91  17
  -3   4  19 75465.3 3904.08  33
   3   4  19 72533.8 3586.55  34
  -3  -4  19 74157.8 3565.15  13
  -3  -4  19 67376.1 3592.36  10
  -3  -4  19 64030.6 3601.05  14
  -3  -4  20 42717.1 2367.17  18
   3  -4  20 35084.6 2387.83  17
  -3  -4  20 41235.2 2423.65  17
  -3   4  20 45912.0 2616.68  33
   3   4  20 44131.5 2359.88  34
  -3  -4  20 44079.1 2335.97  13
  -3  -4  20 42426.4 2392.99  10
  -3  -4  20 45722.4 2438.88  14
  -3  -4  21 11961.6 879.097  18
   3  -4  21 9794.89 890.590  17
  -3  -4  21 11684.0 913.131  17
  -3   4  21 13782.2 1063.60  33
   3   4  21 13696.8 886.139  34
  -3  -4  21 12496.4 909.151  10
  -3  -4  21 14211.9 862.243  13
  -3  -4  21 11920.4 902.817  14
  -3   4  22 19389.6 1389.67  33
   3   4  22 21851.1 1253.85  34
  -3  -4  22 21653.5 1225.30  13
  -3  -4  22 20933.7 1281.08  10
  -3  -4  22 20403.8 1276.76  14
  -3   4  22 21761.6 1310.06  34
  -3  -4  22 20043.6 1251.84  18
   3  -4  22 17379.2 1268.18  17
  -3  -4  22 18676.3 1274.47  17
   3  -4  23 47912.3 2645.16  25
  -3  -4  23 55473.1 2571.25  13
  -3  -4  23 50420.3 2606.25  10
   3  -4  23 41657.7 2527.39  13
  -3  -4  23 48355.6 2572.72  18
   3  -4  23 42442.6 2586.46  17
  -3  -4  23 46374.2 2612.02  17
  -3   4  23 48417.2 2608.07  34
   3   4  23 50643.8 2573.54  34
   3  -4  24 18846.7 1133.15  25
  -3  -4  24 18460.3 1091.63  10
   3  -4  24 14994.7 1012.49  13
  -3  -4  24 19468.6 1051.63  13
  -3  -4  24 17640.0 1063.73  18
   3  -4  24 15062.4 1062.39  17
  -3  -4  24 15933.4 1076.49  17
  -3   4  24 16915.6 1074.69  34
   3   4  24 18422.7 1065.69  34
   3  -4  25 23312.2 1315.80  25
  -3  -4  25 23564.7 1282.49  10
   3  -4  25 18500.7 1187.80  13
  -3  -4  25 25332.1 1254.80  13
  -3  -4  25 21469.7 1249.36  18
   3  -4  25 17924.7 1236.14  17
  -3  -4  25 20705.2 1269.00  17
  -3   4  25 22669.1 1270.17  34
   3   4  25 23177.2 1263.31  34
   3  -4  26 5478.67 467.014  25
  -3  -4  26 5759.33 462.629  10
  -3  -4  26 5717.98 419.746  13
  -3  -4  26 5331.50 427.364  18
   3  -4  26 4249.05 409.191  17
  -3  -4  26 5187.33 445.493  17
  -3   4  26 5619.17 445.828  34
   3   4  26 5853.30 450.626  34
   3  -4  27 2698.91 296.932  25
  -3  -4  27 2315.00 249.353  13
  -3  -4  27 2443.87 277.593  10
  -3  -4  27 2312.88 257.701  17
   3  -4  27 1768.13 226.404  17
  -3   4  27 2181.93 252.438  34
   3   4  27 2522.86 270.688  34
   3  -4  28 8962.78 585.095  25
  -3  -4  28 9477.50 538.452  13
  -3  -4  28 9415.14 564.300  10
  -3  -4  28 7932.88 550.426  17
   3   4  28 9056.57 564.012  34
   3   4  29 38283.7 1958.19  34
  -3  -4  29 40425.6 1960.41  10
  -3  -4  29 40795.3 1932.49  13
   3   4  29 37951.9 1955.36  35
   3  -4  29 37722.2 1977.61  25
   3  -4  30 19612.3 1098.35  25
  -3  -4  30 20572.2 1081.40  10
  -3  -4  31 11421.0 636.883  10
  -3  -4  32 2671.17 191.652  10
   3  -5 -27 10034.9 568.421   1
   3  -5 -26 13424.0 756.729   1
   3  -5 -25 1789.52 205.753   1
  -3  -5 -25 1654.30 194.780  23
   3  -5 -24 1976.15 240.400   1
  -3  -5 -24 2432.24 247.547  23
   3  -5 -23 21548.2 1098.34   1
  -3  -5 -23 20991.2 1095.81  23
   3  -5 -22 66622.2 3225.15   1
  -3  -5 -22 66755.5 3223.95  23
  -3  -5 -21 27175.2 1624.80   9
  -3  -5 -21 38634.3 1805.30  23
   3  -5 -21 31395.0 1738.93  23
   3  -5 -21 36752.2 1800.82   1
   3  -5 -20 18981.2 1180.14  27
  -3  -5 -20 15723.6 989.296   9
   3  -5 -20 16297.9 1082.27  23
  -3  -5 -20 21643.5 1164.17  23
   3  -5 -20 20445.1 1161.46   1
   3  -5 -19 4705.91 546.695  27
  -3  -5 -19 4022.55 359.992   9
  -3  -5 -19 4485.93 473.561  23
   3  -5 -19 4703.65 456.242  23
   3  -5 -19 5476.97 526.446   1
   3  -5 -18 11581.6 942.161  27
  -3  -5 -18 10611.2 742.633   9
   3  -5 -18 10341.5 822.389  23
  -3  -5 -18 13781.6 913.141  23
   3  -5 -18 13952.6 911.005   1
   3  -5 -17 13752.6 978.949  27
  -3  -5 -17 10202.4 745.601   9
   3  -5 -17 9673.88 796.470  23
  -3  -5 -17 12692.4 920.883  23
   3  -5 -17 12725.3 871.342   1
   3  -5 -16 50732.2 2677.27  27
  -3  -5 -16 42503.4 2465.75   9
   3  -5 -16 41344.3 2482.84  23
  -3  -5 -16 49177.7 2634.43  23
   3  -5 -16 50717.0 2566.62   1
   3  -5 -15 24191.0 1551.05  27
  -3  -5 -15 22612.4 1400.34   9
  -3  -5 -15 26512.9 1533.85  23
   3  -5 -15 25929.7 1459.92   1
   3  -5 -14 11938.6 841.038   1
   3  -5 -14 9021.21 855.025  16
   3  -5 -14 13868.8 984.279  27
   3  -5 -14 9659.38 763.816  23
  -3  -5 -14 12746.7 922.203  23
  -3  -5 -14 11282.6 823.579   9
  -3  -5 -14 11009.0 757.284   6
   3  -5 -13 14062.9 917.095   1
   3  -5 -13 11151.0 1675.22  31
   3  -5 -13 11215.2 1001.11  16
   3  -5 -13 14943.1 1052.76  27
   3  -5 -13 11127.9 838.996  23
  -3  -5 -13 12633.0 906.907   9
  -3  -5 -13 13689.4 878.116   6
   3  -5 -12 48486.3 3121.40  16
   3  -5 -12 58844.6 3143.36  27
   3  -5 -12 50794.9 4207.11  31
  -3  -5 -12 55034.1 3012.02   9
  -3  -5 -12 55283.7 2974.29   6
   3  -5 -12 59804.4 3000.86   1
   3  -5 -11 29295.1 3151.71  15
   3  -5 -11 29237.5 2137.84  16
  -3  -5 -11 31699.7 2880.08  15
   3  -5 -11 36938.4 2125.76  27
   3  -5 -11 32256.1 3048.52  31
  -3  -5 -11 34412.3 1985.39   6
  -3  -5 -11 36910.1 2019.75   9
   3  -5 -11 37030.7 1976.54   1
   3  -5 -10 38680.7 3804.19  15
   3  -5 -10 40157.2 2621.44  16
  -3  -5 -10 36839.1 3354.46  15
   3  -5 -10 40412.1 3468.82  31
   3  -5 -10 46800.6 2547.25  27
  -3  -5 -10 45044.8 2432.28   9
  -3  -5 -10 42830.8 2433.85   6
   3  -5 -10 44138.5 2380.20   1
   3  -5  -9 13868.8 930.228   1
  -3   5  -9 13683.5 925.292  36
   3  -5  -9 14097.5 1793.00  31
  -3  -5  -9 12496.9 1722.51  15
  -3  -5  -9 13111.3 993.081   6
  -3  -5  -9 16395.4 1009.27   9
   3  -5  -9 13427.7 1244.93  16
   3  -5  -9 12227.0 2066.44  15
   3  -5  -8 10938.3 780.463   4
   3  -5  -8 11786.9 802.601   1
  -3   5  -8 10986.5 791.098  36
   3  -5  -8 10280.8 1490.60  31
  -3  -5  -8 12230.8 1699.07  15
   3  -5  -8 12163.3 1531.83  28
   3  -5  -8 12320.5 2076.43  15
  -3  -5  -8 10573.3 885.513   6
  -3  -5  -8 11969.5 843.793   9
  -3  -5  -7 17045.3 1049.34   9
  -3  -5  -7 13345.0 1089.50   6
  -3   5  -7 15025.5 978.383  36
   3  -5  -7 14913.4 1780.50  31
   3  -5  -7 16049.7 1070.49  26
   3  -5  -7 14522.4 1730.75  28
  -3  -5  -7 17534.9 2114.57  15
   3  -5  -7 12355.1 2239.78  15
  -3  -5  -7 15610.4 1048.73  23
   3  -5  -7 15214.4 981.584   1
   3  -5  -7 13801.8 956.934   4
  -3  -5  -6 81365.1 4103.62   9
  -3  -5  -6 75988.3 4230.71   6
   3  -5  -6 72049.2 4002.07   4
  -3   5  -6 76536.6 4025.28  36
   3  -5  -6 82529.3 4142.59  26
   3  -5  -6 84415.6 5223.19  28
  -3  -5  -6 79452.4 4102.79  23
  -3  -5  -6 76669.4 5536.51  15
  -3  -5  -6 79084.3 4059.18  17
   3  -5  -6 70561.3 6099.71  15
  -3  -5  -5 55677.7 3013.49   9
  -3  -5  -5 51420.3 3132.09   6
   3  -5  -5 54511.6 2944.62   4
  -3  -5  -5 54033.4 2965.42   4
  -3   5  -5 58251.7 2973.16  36
   3  -5  -5 58330.5 3065.89  26
   3  -5  -5 54380.7 3983.82  28
  -3  -5  -5 57181.1 3028.65  23
  -3  -5  -5 57384.0 2991.46  17
   3  -5  -5 53683.6 5115.36  15
  -3  -5  -5 52388.8 4426.58  15
  -3  -5  -4 23821.6 1371.12   9
  -3  -5  -4 21051.3 1466.49   6
  -3   5  -4 22903.7 1322.61  36
   3  -5  -4 19333.9 1270.51   4
  -3  -5  -4 21460.5 1311.86   4
   3  -5  -4 20710.8 2145.33  28
   3  -5  -4 24668.6 1426.04  26
  -3  -5  -4 22348.2 1367.76  23
   3  -5  -4 23088.9 3146.02  15
  -3  -5  -4 21348.0 1317.56  17
  -3  -5  -4 21502.2 2573.63  15
  -3  -5  -3 12867.3 1031.81   6
  -3  -5  -3 14051.2 933.792   9
  -3   5  -3 14559.7 904.385  36
  -3  -5  -3 9256.72 1766.94  15
   3  -5  -3 13619.7 1645.98  28
   3  -5  -3 15463.9 999.891  26
   3  -5  -3 10548.3 2318.65  15
  -3  -5  -3 12660.5 881.327  17
  -3  -5  -3 12676.1 916.498  23
   3  -5  -3 12150.2 852.186   4
  -3  -5  -3 13249.5 885.501   4
  -3  -5  -2 39763.4 2469.94   6
  -3  -5  -2 43299.9 2359.92   9
   3  -5  -2 41545.0 2286.60   4
  -3  -5  -2 43113.0 2320.58   4
  -3   5  -2 41326.8 2299.22  36
   3  -5  -2 43581.4 3366.46  28
   3  -5  -2 44173.2 2412.26  26
  -3  -5  -2 44943.3 2378.81  23
   3  -5  -2 40969.2 2278.80  17
  -3  -5  -2 43412.6 2331.41  17
  -3  -5  -2 41421.2 3900.94  15
   3  -5  -2 34108.7 4309.58  15
  -3  -5  -1 32263.7 1853.11   9
  -3  -5  -1 29122.4 1951.64   6
  -3   5  -1 34120.1 1823.95  36
   3  -5  -1 32913.0 1800.32   4
  -3  -5  -1 31128.5 1810.81   4
   3  -5  -1 32233.6 2790.65  28
   3  -5  -1 33279.4 1916.32  26
  -3  -5  -1 30977.0 1850.99  23
   3  -5  -1 26557.0 3770.98  15
  -3  -5  -1 32835.3 1832.68  17
   3  -5  -1 32054.6 1784.05  17
  -3  -5  -1 32619.4 3391.72  15
  -3  -5   0 87360.8 4744.78   6
  -3  -5   0 93891.8 4629.83   9
  -3   5   0 87432.8 4553.36  36
  -3  -5   0 81921.1 4535.61  13
  -3  -5   0 91087.7 4582.61   4
   3  -5   0 87427.5 4544.70   4
   3  -5   0 86176.0 5697.84  28
   3  -5   0 93814.9 4686.99  26
  -3  -5   0 90285.4 4619.53  23
  -3  -5   0 94142.3 4605.51  17
  -3  -5   0 85913.1 6431.29  15
   3  -5   0 86511.9 4533.74  17
   3  -5   0 84532.9 7426.38  15
  -3  -5   1 38277.3 2180.33   9
  -3  -5   1 37316.5 2296.54   6
  -3   5   1 45252.1 2177.37  36
  -3  -5   1 34921.8 2136.92  13
   3  -5   1 39718.8 2131.98   4
  -3  -5   1 41823.7 2171.38   4
   3  -5   1 37081.1 3129.73  28
   3  -5   1 41539.4 2261.50  26
  -3  -5   1 37563.3 2178.03  23
  -3  -5   1 39078.0 2163.04  17
   3  -5   1 36297.4 2100.91  17
   3  -5   1 33589.3 4339.39  15
  -3  -5   2 38635.2 2374.45   6
  -3  -5   2 42086.9 2277.28   9
  -3   5   2 40259.4 2212.75  36
  -3  -5   2 37338.2 2245.67  13
  -3  -5   2 40846.6 2237.00   4
   3  -5   2 42028.0 2216.46   4
   3  -5   2 41593.1 2332.43  26
  -3  -5   2 40013.7 2262.52  23
  -3  -5   2 42173.3 2255.75  17
   3  -5   2 40332.1 2195.67  17
  -3  -5   3 21009.0 1245.95   4
   3  -5   3 19880.4 1208.99   4
  -3   5   3 21158.9 1226.95  36
  -3  -5   3 20810.1 1270.99   9
  -3  -5   3 20030.5 1366.60   6
  -3  -5   3 21392.2 1259.01  17
   3  -5   3 20324.7 1199.28  17
  -3  -5   3 19246.1 1173.83  10
  -3  -5   3 17201.9 1255.87  13
  -3  -5   4 30400.7 1640.58   4
   3  -5   4 27611.8 1592.56   4
  -3   5   4 26993.1 1585.42  36
  -3  -5   4 30098.9 1672.09   9
  -3  -5   4 25935.1 1733.58   6
   3  -5   4 20404.3 3236.86  15
  -3  -5   4 29854.9 1647.46  17
   3  -5   4 27273.1 1577.90  17
  -3  -5   4 21426.5 2718.57  15
  -3  -5   4 24960.2 1663.71  13
  -3  -5   4 28844.2 1567.93  10
  -3  -5   5 52463.5 2770.67   4
   3  -5   5 52226.0 2743.93   4
  -3  -5   5 49391.4 2846.72  13
  -3  -5   5 51258.9 2702.51  10
  -3   5   5 50421.6 2735.45  36
  -3  -5   5 53363.6 2813.27   9
  -3  -5   5 52346.5 2781.06  17
   3  -5   5 49293.8 2719.74  17
  -3  -5   5 47997.0 4143.55  15
   3  -5   5 54396.8 5060.43  15
   3  -5   6 70013.1 3509.29   4
  -3  -5   6 70558.7 3537.83   4
  -3  -5   6 63619.6 3618.08  13
  -3  -5   6 67558.3 3458.73  10
  -3   5   6 63392.6 3483.89  36
   3  -5   6 56511.5 4518.33  28
  -3  -5   6 68006.1 3565.57   9
  -3  -5   6 71421.6 3554.99  17
   3  -5   6 63455.7 3474.84  17
   3  -5   6 64454.9 5696.60  15
  -3  -5   6 60013.7 4820.00  15
   3  -5   7 9709.32 720.376   4
  -3  -5   7 11448.5 758.836   4
  -3  -5   7 10185.7 696.122  10
  -3  -5   7 8842.42 807.615  13
  -3  -5   7 10187.8 1609.17  15
  -3   5   7 9154.47 716.704  36
   3  -5   7 8791.69 1388.67  28
   3  -5   7 11465.1 831.740  25
  -3  -5   7 10932.4 782.982   9
  -3  -5   7 9926.09 743.526  17
   3  -5   7 8218.81 688.491  17
   3  -5   7 10777.9 1975.41  15
   3  -5   8 14566.0 964.408   4
  -3  -5   8 14408.9 970.405   4
  -3   5   8 15292.3 973.637  36
  -3  -5   8 14257.7 922.015  10
  -3  -5   8 13202.7 1016.79  13
  -3  -5   8 14309.4 1885.83  15
   3  -5   8 16629.5 1070.00  25
   3  -5   8 14390.3 1806.57  28
   3  -5   8 15812.3 1077.93  26
  -3  -5   8 14147.2 1069.27   6
  -3  -5   8 14564.3 1015.82   9
  -3  -5   8 14701.2 989.706  17
   3  -5   8 13601.4 942.846  17
   3  -5   8 14666.6 2222.42  15
   3  -5   9 13043.9 2099.29  15
   3  -5   9 12108.2 1181.31  16
  -3  -5   9 15212.1 953.110  17
   3  -5   9 11890.4 877.861  17
  -3   5   9 14792.2 1071.25  33
  -3  -5   9 12116.7 939.801  13
  -3  -5   9 9166.16 1526.56  15
  -3  -5   9 13448.5 869.394  10
   3  -5   9 14960.7 1011.51  25
   3  -5   9 12922.3 1714.91  28
  -3  -5   9 12840.9 945.487   9
  -3  -5   9 14747.1 938.903   4
  -3   5  10 52813.8 2883.36  33
  -3  -5  10 50829.9 2745.59  13
  -3  -5  10 50486.4 2641.62  10
   3  -5  10 45443.4 3754.40  28
  -3  -5  10 51386.9 2707.39   4
   3  -5  10 48643.4 4228.57  15
   3  -5  10 46923.6 2917.90  16
  -3  -5  10 48116.1 3787.43  15
  -3  -5  10 51805.1 2728.49  17
   3  -5  10 45305.3 2658.53  17
   3   5  11 33998.9 1970.88  34
  -3   5  11 29260.3 2821.69  38
  -3   5  11 35652.4 2101.13  33
  -3  -5  11 34059.4 1940.72  13
  -3  -5  11 35309.3 1862.91  10
   3  -5  11 28800.2 2842.13  28
  -3  -5  11 34038.0 1925.21   4
   3  -5  11 37092.9 3367.19  15
   3  -5  11 29972.2 2082.45  16
  -3  -5  11 28783.4 2747.03  15
  -3  -5  11 36014.2 1948.25  17
   3  -5  11 30770.0 1878.13  17
   3   5  12 49508.3 2606.42  34
  -3   5  12 39116.1 3469.10  38
  -3   5  12 48460.8 2748.08  33
  -3  -5  12 50723.7 2593.64  14
  -3  -5  12 45807.2 2557.94  13
  -3  -5  12 46533.5 2491.76  10
   3  -5  12 44613.7 3661.66  28
  -3  -5  12 46985.3 2563.25   4
   3  -5  12 42918.5 3819.31  15
   3  -5  12 42187.9 2678.52  16
  -3  -5  12 50897.3 2593.72  17
   3  -5  12 41887.8 2517.86  17
   3  -5  13 11506.1 1649.15  28
  -3  -5  13 14533.5 959.063  13
  -3  -5  13 13346.3 896.128  10
  -3  -5  13 14693.2 967.232  14
   3   5  13 15178.9 991.998  34
  -3   5  13 15264.9 1142.65  33
   3  -5  13 12202.2 1041.92  16
  -3  -5  13 15293.0 980.061  17
   3  -5  13 11853.7 914.715  17
  -3  -5  14 9999.54 719.660  10
  -3  -5  14 11175.7 763.866  13
  -3  -5  14 11522.6 794.353  14
  -3   5  14 11628.0 961.020  33
   3   5  14 9681.53 771.405  34
   3  -5  14 8654.61 812.662  16
  -3  -5  14 9744.95 761.745  17
   3  -5  14 9143.84 743.884  17
  -3  -5  15 22536.2 1293.87  14
  -3  -5  15 22555.5 1255.86  13
  -3  -5  15 20504.7 1209.94  10
  -3   5  15 23346.5 1499.63  33
   3   5  15 21686.6 1263.49  34
   3  -5  15 14729.9 1225.04  16
  -3  -5  15 20521.7 1274.04  17
   3  -5  15 17323.8 1228.92  17
  -3  -5  16 46030.5 2424.96  14
  -3  -5  16 45094.5 2350.29  10
  -3   5  16 46721.9 2610.15  33
   3   5  16 47546.6 2383.78  34
  -3  -5  16 44538.7 2421.18  17
  -3  -5  17 14084.3 898.171  10
  -3  -5  17 14261.1 949.742  14
  -3  -5  17 14285.4 955.770  17
   3  -5  17 11023.6 898.741  17
  -3   5  17 12646.2 1049.04  33
   3   5  17 15313.9 919.051  34
   3  -5  18 15638.8 1011.99  25
  -3  -5  18 14091.2 881.559  10
  -3  -5  18 15238.6 948.460  14
  -3  -5  18 13311.7 924.442  17
   3  -5  18 10179.9 869.761  17
  -3   5  18 12086.4 996.213  33
   3   5  18 13683.1 874.656  34
   3  -5  19 5477.91 549.153  25
  -3  -5  19 6460.19 479.530  13
  -3  -5  19 5870.30 517.598  14
  -3  -5  19 5760.11 491.340  10
  -3  -5  19 5253.04 505.844  17
   3  -5  19 4662.80 473.579  17
  -3   5  19 5367.71 574.087  33
   3   5  19 5569.16 466.902  34
   3   5  20 25929.1 1386.27  34
   3  -5  20 22192.6 1401.63  13
  -3  -5  20 23688.8 1387.66  10
  -3  -5  20 26956.1 1398.79  13
  -3  -5  20 25743.4 1448.57  14
   3  -5  20 25473.6 1472.65  25
  -3   5  20 24534.7 1464.58  34
  -3  -5  20 21889.3 1417.53  17
   3  -5  21 34196.3 1919.77  25
  -3  -5  21 39110.1 1873.32  13
   3  -5  21 33238.8 1868.47  13
  -3   5  21 33251.1 1908.78  34
   3   5  21 35679.7 1850.95  34
  -3  -5  21 31092.4 1879.97  17
   3  -5  22 56497.5 2990.69  25
  -3  -5  22 65520.8 2957.91  13
   3  -5  22 53613.7 2931.75  13
  -3   5  22 54623.9 2971.38  34
   3   5  22 59839.1 2929.79  34
  -3  -5  22 52585.7 2956.62  17
   3  -5  23 12430.0 805.602  25
   3  -5  23 11597.5 752.840  13
  -3   5  23 12550.7 796.488  34
   3   5  23 13011.7 762.731  34
  -3  -5  23 12112.9 785.805  17
  -3  -5  24 2755.32 241.629  13
   3  -5  24 1755.36 201.965  13
  -3   5  24 2494.37 248.501  34
  -3  -5  24 2481.03 235.442  17
   3  -5  24 2140.33 241.428  25
   3  -5  25 539.393 98.6373  13
  -3  -5  25 903.082 130.936  17
   3  -5  25 619.154 140.594  25
  -3  -5  26 9845.27 567.596  13
  -3  -5  27 12541.1 674.347  13
  -3  -6 -20 8045.33 463.272   4
  -3  -6 -19 19778.7 1058.06   4
  -3  -6 -18 8472.22 527.058   4
  -3  -6 -17 4227.43 338.013   4
   3  -6 -16 2195.21 310.721  27
  -3  -6 -16 2394.22 254.767   4
  -3  -6 -15 13691.2 874.738  23
   3  -6 -15 11827.6 893.168  27
  -3  -6 -15 13980.7 835.486   4
   3  -6 -14 14764.2 986.296  27
  -3  -6 -14 14894.6 870.441   4
  -3  -6 -14 13478.2 899.731  23
  -3  -6 -14 12892.5 772.260   9
   3  -6 -13 37710.4 2167.07  27
  -3  -6 -13 38724.4 2048.55   4
  -3  -6 -13 42592.8 2114.19  23
  -3  -6 -13 35151.0 1963.26   9
   3  -6 -12 12897.5 918.741  27
  -3  -6 -12 13709.9 795.880   4
  -3  -6 -12 12608.3 828.044  23
  -3  -6 -12 11320.7 723.319   9
   3  -6 -11 1192.91 304.195  16
   3  -6 -11 1414.35 338.553  27
  -3  -6 -11 1608.48 247.044   4
  -3  -6 -11 1284.24 259.820  23
  -3  -6 -11 1277.45 201.764   9
   3  -6 -10 9868.72 770.888  16
   3  -6 -10 10916.6 834.851  27
  -3  -6 -10 9844.44 721.062  23
  -3  -6 -10 9064.57 666.497   9
  -3  -6 -10 9908.55 682.262   4
  -3  -6  -9 38078.4 1829.24  23
  -3  -6  -9 34554.4 1776.50   9
  -3  -6  -9 36789.9 1779.81   4
   3  -6  -8 22491.6 1433.47  16
  -3  -6  -8 25721.8 1359.83  23
  -3  -6  -8 21924.0 1311.16   9
  -3  -6  -8 25430.6 1323.82   4
   3  -6  -7 29505.9 1805.64  16
  -3  -6  -7 32554.6 1690.60  23
  -3  -6  -7 29654.7 1662.46   9
  -3  -6  -7 31925.4 1652.71   4
   3  -6  -6 10625.9 920.140  16
   3  -6  -6 9043.12 690.062   4
  -3  -6  -6 11977.8 748.429   4
  -3  -6  -6 11694.7 775.268  23
  -3  -6  -6 10943.2 760.227   9
   3  -6  -5 1255.14 463.766  16
   3  -6  -5 476.713 297.254  27
   3  -6  -5 788.063 217.424   4
  -3  -6  -5 875.335 197.600   4
  -3  -6  -5 1030.79 243.278  23
  -3  -6  -5 707.215 208.191   9
   3  -6  -4 14021.6 1092.31  27
   3  -6  -4 15015.9 952.127   4
  -3  -6  -4 15715.3 981.521   4
  -3  -6  -4 14956.7 990.499  23
  -3  -6  -4 16818.3 1029.12   9
   3  -6  -3 40895.0 2359.20   4
  -3  -6  -3 48612.3 2425.88   4
  -3  -6  -3 46845.9 2459.96   9
   3  -6  -3 50492.4 2715.07  16
   3  -6  -3 41801.1 2528.75  27
   3  -6  -2 18187.1 1086.53   4
  -3  -6  -2 18108.8 1113.48   4
  -3  -6  -2 19887.6 1174.14   9
   3  -6  -2 20666.5 1445.33  16
   3  -6  -2 16959.8 1238.04  27
  -3  -6  -1 15139.1 910.024   4
   3  -6  -1 13209.9 864.763   4
  -3  -6  -1 13908.0 936.724   9
   3  -6  -1 14484.5 1205.08  16
  -3  -6  -1 14392.4 908.718  17
   3  -6  -1 13831.7 1029.71  27
  -3  -6   0 4836.34 441.933   4
   3  -6   0 5687.33 443.790   4
  -3  -6   0 5211.12 445.654  17
  -3  -6   0 4767.64 477.622   9
   3  -6   1 14762.8 900.517   4
  -3  -6   1 13603.5 916.870   4
   3  -6   1 16683.3 1302.97  16
  -3  -6   1 14885.5 930.746  17
  -3  -6   1 14568.3 972.503   9
   3  -6   2 22423.7 1273.66   4
  -3  -6   2 22580.6 1306.90   4
  -3  -6   2 21785.1 1300.82  17
  -3  -6   2 22027.4 1348.25   9
   3  -6   3 38626.8 2179.59   4
  -3  -6   3 42500.8 2231.70   4
  -3  -6   3 42623.0 2289.42   9
  -3  -6   3 41729.8 2233.19  17
  -3  -6   4 17235.9 1031.45   4
  -3  -6   4 16317.0 1067.92   9
  -3  -6   4 16343.5 1024.22  17
   3  -6   4 15852.5 1083.67  26
  -3  -6   5 1030.00 219.641   4
  -3  -6   5 1200.65 244.256   9
  -3  -6   5 1273.55 234.787  17
   3  -6   5 1056.84 294.553  26
  -3  -6   6 9531.74 666.688   4
  -3  -6   6 9121.61 693.938   9
   3  -6   6 9655.32 869.152  16
  -3  -6   6 9471.32 659.351  17
   3  -6   6 7867.60 710.304  26
  -3  -6   7 31149.4 1731.27   4
   3  -6   7 31502.4 1802.11  26
  -3  -6   7 31294.2 1775.91   9
   3  -6   7 29117.9 1864.10  16
  -3  -6   7 30613.5 1724.53  17
   3  -6   8 18709.2 1223.11  26
   3  -6   8 17611.6 1275.24  16
  -3  -6   8 19578.7 1169.54  17
  -3  -6   8 19744.6 1176.27   4
  -3  -6   8 20973.5 1195.07  14
  -3  -6   9 42188.7 2163.63  14
   3  -6   9 38997.5 2234.10  16
  -3  -6   9 39604.0 2141.21  17
   3  -6   9 36453.4 2178.42  26
  -3  -6  10 8555.51 630.410  13
  -3  -6  10 10552.2 680.279  14
   3  -6  10 8285.68 717.567  16
  -3  -6  10 9200.84 659.004  17
   3  -6  10 9161.33 708.785  26
  -3  -6  11 1116.09 226.672  14
  -3  -6  11 878.663 200.345  13
  -3  -6  11 933.354 199.752  17
   3  -6  11 873.792 289.834  16
   3  -6  11 781.152 244.399  26
  -3  -6  12 14593.6 914.935  14
  -3  -6  12 13917.9 870.337  13
  -3  -6  12 14931.2 916.780  17
   3  -6  12 14520.6 944.861  26
  -3  -6  13 35235.0 1868.27  13
  -3  -6  13 39080.5 1938.46  14
  -3  -6  13 34813.5 1910.18  17
   3  -6  13 31564.8 1900.62  26
  -3  -6  14 17039.5 951.233  13
   3  -6  14 17132.6 1007.72  13
  -3  -6  14 19045.9 1021.21  14
  -3  -6  14 15572.7 983.763  17
   3  -6  14 13713.9 958.291  26
  -3  -6  15 10527.6 606.073  13
   3  -6  15 8895.12 625.063  13
  -3  -6  15 10509.7 657.673  14
  -3  -6  15 9060.83 632.268  17
   3  -6  15 7767.87 591.470  26
  -3  -6  16 2325.99 246.861  13
  -3  -6  16 3077.08 294.702  14
   3  -6  16 3031.13 282.884  13
  -3  -6  16 2158.66 253.415  17
  -3  -6  17 4108.56 307.016  13
   3  -6  17 3913.25 325.224  13
  -3  -6  17 3794.82 324.508  14
  -3   6  17 3220.99 349.527  34
  -3  -6  17 3693.09 316.067  17
   3  -6  18 6432.10 455.886  13
  -3  -6  18 7338.79 444.489  13
   3  -6  19 23759.7 1255.48  13
   3  -6  20 7499.08 444.272  13
  -3  -7  -6 15572.6 843.669   4
  -3  -7  -5 10057.7 582.951   4
  -3  -7  -4 8219.56 497.747   4
  -3  -7  -3 1208.24 156.539   4
  -3  -7  -2 1611.82 175.972   4
  -3  -7   2 2429.84 223.966  14
  -3  -7   3 2366.54 223.263  14
  -3  -7   4 8992.80 547.570  14
  -3  -7   5 13086.1 745.155  14
  -3  -7   6 17485.9 952.262  14
  -3  -7   7 4449.09 309.842  14
  -3  -7   8 156.960 68.8899  14
  -4   0 -35 19737.5 1075.53  22
  -4   0 -34 48793.7 2513.00  22
  -4   0 -33 37956.6 2015.96  22
   4   0 -18 82190.4 4977.47  31
   4   0 -17 42534.6 3046.41  31
   4   0 -16 130939. 7468.50  31
   4   0 -15 82494.7 5121.95  31
   4   0 -14 36121.7 2693.00  31
   4   0 -13 84145.2 4943.62  31
   4   0 -12 53322.2 3324.57  31
   4   0 -11 260988. 13339.2  31
  -4   0  -6 102596. 5782.58  38
  -4   0  -5 128113. 7125.27  38
  -4   0  -4 77736.6 4744.53  38
  -4   0  -3 112500. 6594.83  38
  -4   0  -3 113978. 5973.03  32
  -4   0  -2 107903. 6441.40  38
  -4   0  -2 108521. 5698.19  32
  -4   0  -1 154610. 8918.58  38
  -4   0  -1 157547. 8043.25  32
  -4   0   0 233349. 12791.7  38
  -4   0   0 232615. 11718.4  32
  -4   0   1 156522. 9016.17  38
  -4   0   1 153884. 7907.31  32
  -4   0   2 90772.2 5903.41  38
  -4   0   2 95179.2 4986.86  32
  -4   0   3 105958. 5569.85  32
   4   0   4 105618. 5194.05  29
  -4   0   4 98021.5 4941.67  21
  -4   0   4 96854.0 5261.62  32
   4   0   5 98075.2 4969.12  29
  -4   0   5 95874.4 5883.90  38
  -4   0   5 92975.5 4706.56  21
   4   0   6 104488. 5455.62  29
  -4   0   6 106654. 6337.41  38
  -4   0   6 103474. 5182.05  21
   4   0   7 115618. 5820.97  29
  -4   0   7 107083. 5492.46  21
   4   0   8 199057. 9940.81  29
  -4   0   8 202093. 10753.5  38
   4   0   8 191666. 9559.18  35
   4   0   9 162207. 7974.79  29
   4   0   9 155657. 7527.75  35
  -4   0   9 145696. 7465.48  36
  -4   0   9 161377. 8665.58  38
   4   0  10 225782. 11037.2  29
  -4   0  10 206970. 10434.7  36
   4   0  10 218561. 10510.9  35
  -4   0  10 224821. 11613.1  38
   4   0  10 208933. 10486.8  34
   4   0  11 201703. 9860.17  29
   4   0  11 183373. 9215.45  35
   4   0  11 182371. 9198.91  34
   4   0  12 56692.7 2872.96  35
   4   0  12 49966.2 2826.35  34
  -4   0  12 51884.5 2767.72  33
   4   0  13 56529.9 3674.67  29
   4   0  13 54238.0 2902.38  35
   4   0  13 51068.0 2872.05  34
  -4   0  13 53217.3 2806.23  33
  -4   0  13 54984.9 3442.29  30
   4   0  14 58286.2 4023.01  29
   4   0  14 59220.0 3177.23  35
   4   0  14 56839.6 3144.97  34
  -4   0  14 60582.3 3695.90  30
  -4   0  14 57226.0 3065.57  33
   4   0  15 71335.0 4767.65  29
   4   0  15 67985.7 3730.51  35
   4   0  15 70448.9 3706.02  34
  -4   0  15 64561.8 4171.16  30
  -4   0  15 68706.3 3631.06  33
   4   0  16 141473. 7315.97  34
  -4   0  16 136619. 7878.80  30
  -4   0  16 138431. 7273.74  33
   4   0  16 153793. 7431.01  35
   4   0  16 146555. 8694.41  29
  -4   0  16 153803. 7358.20  20
  -4   0  16 131672. 7749.39   8
   4   0  17 28190.5 1606.25  34
  -4   0  17 31404.7 2204.47  30
  -4   0  17 24384.7 1535.09  33
   4   0  17 28911.5 1670.28  35
   4   0  17 29551.2 2897.59  29
   4   0  17 23661.9 2335.63  30
  -4   0  17 27337.7 1648.01  20
  -4   0  17 22870.5 1519.28  10
  -4   0  18 50153.1 2862.81  10
   4   0  18 53132.0 2878.93  34
  -4   0  18 48373.1 3405.19  30
  -4   0  18 51362.6 2838.57  33
   4   0  18 55948.9 2944.38  35
   4   0  18 62402.0 4384.95  29
   4   0  18 45197.1 3819.98  30
  -4   0  18 57539.9 3028.40  20
  -4   0  18 53150.8 2906.26  19
  -4   0  19 45690.6 2725.55  10
   4   0  19 48504.0 2698.28  34
  -4   0  19 52018.9 3339.06  30
   4   0  19 52047.7 2760.03  35
   4   0  19 47034.4 3833.34  29
   4   0  19 42593.0 3792.83  30
  -4   0  19 50839.5 2874.69  20
  -4   0  19 51848.9 2749.05  19
  -4   0  20 45554.1 2798.15  10
   4   0  20 53383.4 2778.58  34
  -4   0  20 52272.6 3412.66  30
   4   0  20 53345.7 2810.05  35
   4   0  20 51779.8 3919.40  29
   4   0  20 46223.3 3906.96  30
  -4   0  20 47781.6 2886.64  20
  -4   0  20 52988.9 2809.84  19
  -4   0  21 99529.7 5797.99  10
   4   0  21 116561. 5801.03  34
  -4   0  21 110694. 6471.68  30
   4   0  21 116736. 5828.32  35
   4   0  21 123794. 7082.96  29
   4   0  21 102402. 6919.26  30
  -4   0  21 116755. 5950.61  20
  -4   0  21 119623. 5843.25  19
  -4   0  22 62347.0 3673.11  10
   4   0  22 70303.6 3677.61  34
  -4   0  22 75985.0 4437.12  30
   4   0  22 72312.0 3705.36  35
   4   0  22 84056.1 4956.34  29
   4   0  22 61277.8 4648.25  30
  -4   0  22 67688.7 3789.78  20
  -4   0  22 73365.3 3722.16  19
  -4   0  23 42840.2 2600.02  10
   4   0  23 48594.3 2613.47  34
  -4   0  23 46015.8 3246.84  30
   4   0  23 48948.5 2632.29  35
   4   0  23 45776.6 3545.78  29
  -4   0  23 51854.2 2747.08  20
  -4   0  23 49169.8 2644.29  19
  -4   0  24 37018.2 2207.13  10
   4   0  24 40468.5 2234.49  35
  -4   0  24 36130.7 2813.97  30
   4   0  24 40314.6 2221.03  34
   4   0  24 40291.2 3129.21  29
  -4   0  24 39141.0 2309.48  20
  -4   0  24 43222.0 2264.61  19
   4   0  25 20137.3 1258.55  34
  -4   0  25 19130.9 1802.07  30
  -4   0  25 18629.9 1239.76  10
   4   0  25 18790.4 1952.60  29
   4   0  25 21254.9 1279.63  35
  -4   0  25 22261.1 1298.96  19
   4   0  26 63266.2 3256.89  34
  -4   0  26 59724.7 3951.14  30
  -4   0  26 56820.7 3210.68  10
   4   0  26 61305.0 4163.17  29
   4   0  26 61322.9 3257.27  35
  -4   0  26 64747.7 3281.89  19
   4   0  27 50549.5 2640.64  34
  -4   0  27 43239.8 3240.87  30
  -4   0  27 48358.7 2599.64  10
   4   0  27 44780.3 3415.78  29
   4   0  27 48686.8 2637.57  35
  -4   0  27 49249.0 2642.05  19
   4   0  28 27171.6 1506.99  34
  -4   0  28 23601.0 2041.98  30
  -4   0  28 22916.9 1436.89  10
   4   0  28 22806.4 2136.46  29
   4   0  28 25620.8 1497.03  35
  -4   0  28 28418.1 1523.08  19
   4   0  29 22622.0 2000.16  29
  -4   0  29 19784.3 1242.88  10
   4   0  29 23043.0 1318.41  35
   4   0  29 23741.7 1322.14  34
  -4   0  29 21000.6 1841.75  30
  -4   0  30 10140.5 679.400  10
   4   0  30 10998.2 744.980  35
   4   0  30 11165.1 749.394  34
  -4   0  31 25513.1 1509.90  10
   4   0  31 30426.4 1604.29  35
   4   0  31 30436.4 1598.30  34
   4   0  32 49735.4 2403.65  34
  -4   0  32 42403.3 2309.09  10
  -4   0  33 35698.9 1722.91  12
   4   0  33 33613.9 1720.35  34
   4   0  33 31654.4 1685.58  24
  -4   0  34 43106.3 2145.96  12
   4   0  34 41490.4 2149.05  34
   4   0  34 38905.0 2112.79  24
   4   0  35 16251.5 914.489  34
   4   0  35 14200.1 881.865  24
  -4   0  36 10535.1 619.220  12
  -4   0  37 12842.0 706.777  12
  -4   0  38 2764.40 191.606  12
  -4   1 -36 21702.0 1169.75  37
  -4   1 -35 38504.7 2013.96  37
   4  -1 -33 28674.3 1491.67   1
   4  -1 -32 7829.95 505.213   1
   4  -1 -31 12750.8 762.046   1
  -4   1 -30 22646.0 1277.86  22
   4  -1 -30 22410.2 1256.84   1
  -4   1 -29 19623.8 1121.87  22
   4  -1 -29 18046.7 1090.19   1
  -4   1 -28 49027.1 2571.80  22
   4  -1 -28 47492.4 2551.34   1
   4  -1 -27 57406.0 3027.12   1
   4  -1 -26 45872.0 2491.25   1
   4  -1 -25 57088.6 3066.73   1
   4  -1 -24 42791.9 2400.60   1
   4  -1 -23 32116.1 1918.14   1
   4  -1 -22 26132.4 1708.25   1
   4  -1 -22 34212.0 2783.51  31
   4  -1 -21 17322.9 1297.41   1
   4  -1 -21 20422.6 2175.82  31
   4  -1 -20 59372.6 3437.54   1
   4  -1 -20 65570.0 4597.49  31
   4  -1 -19 91027.5 5143.80   1
   4  -1 -19 124870. 6812.00  31
   4  -1 -18 60874.3 3475.38   1
   4  -1 -18 74513.1 4757.20  31
   4  -1 -17 88949.3 4772.51   1
   4  -1 -17 97290.9 5867.64  31
   4  -1 -16 59098.0 3224.31   1
   4  -1 -16 61391.1 4113.25  31
   4  -1 -15 95669.0 4959.66   1
   4  -1 -15 106076. 5872.45  31
  -4  -1 -15 89854.9 5637.01   8
   4  -1 -14 113310. 6229.15  31
  -4  -1 -14 100270. 6199.04   8
  -4  -1 -13 54932.0 3725.86   8
  -4   1 -12 84016.0 4767.33  38
  -4  -1 -12 85320.5 4408.07  23
  -4   1 -11 47192.6 2915.52  38
  -4  -1 -11 46272.8 2494.73  23
  -4   1 -10 86325.5 4798.42  38
  -4  -1 -10 80136.0 4255.17  23
  -4   1 -10 87016.5 4298.66  22
  -4  -1 -10 96824.4 5403.36   8
  -4   1  -9 241048. 11724.2  38
  -4  -1  -9 225108. 11035.5  23
  -4   1  -9 216206. 11051.5  22
   4  -1  -9 220877. 11238.2  28
  -4   1  -8 91393.4 4971.88  38
  -4   1  -8 81978.0 4240.79  22
  -4  -1  -8 90845.1 5385.93   8
   4  -1  -8 83139.1 4428.06  28
  -4   1  -7 98743.2 5409.58  38
  -4   1  -7 89054.2 4579.56  22
  -4  -1  -7 103217. 5842.85   8
   4  -1  -7 89966.3 4775.67  28
  -4   1  -6 60245.7 3121.21  37
  -4   1  -6 62102.1 3957.28  38
   4  -1  -6 60302.1 3332.16  28
  -4   1  -6 62387.8 3142.80  22
  -4  -1  -6 68937.8 4359.00   8
   4  -1  -5 58577.0 3277.31  28
  -4   1  -5 70774.4 4113.96  38
  -4   1  -5 59186.3 3058.23  37
  -4   1  -5 59521.8 3517.37  32
  -4   1  -5 61192.5 3080.92  22
  -4   1  -4 196712. 10289.1  38
  -4   1  -4 185795. 9104.85  37
  -4   1  -4 182872. 9123.04  22
  -4   1  -3 146690. 7272.52  37
  -4   1  -3 165269. 8632.78  38
  -4  -1  -3 156452. 7550.92  32
  -4   1  -3 143501. 7292.69  22
  -4  -1  -3 147209. 7275.75  22
  -4   1  -2 114409. 5788.24  37
  -4   1  -2 132076. 7163.47  38
  -4  -1  -2 125568. 6048.44  32
  -4   1  -2 115429. 5814.78  22
  -4   1  -1 126475. 6132.76  37
  -4   1  -1 143199. 7514.44  38
  -4  -1  -1 132993. 6369.33  32
  -4   1  -1 116171. 6148.13  22
  -4  -1   0 28329.7 1683.71  32
  -4   1   0 29308.6 2486.90  38
  -4   1   1 106518. 6068.71  38
  -4   1   1 96797.2 4873.32  21
  -4  -1   1 95744.3 4903.86  23
  -4  -1   1 103054. 5074.12  32
  -4   1   2 128986. 6424.27  21
  -4  -1   2 131533. 6616.29  32
  -4   1   3 127606. 6331.24  21
  -4  -1   3 127985. 6530.79  32
   4   1   4 188079. 8964.19  29
  -4   1   4 180120. 8898.56  21
  -4   1   4 175697. 8867.48  36
   4  -1   4 181483. 8880.65  35
   4   1   5 70679.1 3621.92  29
   4  -1   5 72243.9 3509.86  35
  -4   1   5 74832.2 4564.31  38
  -4   1   5 70970.7 3495.16  36
  -4   1   5 68830.7 3522.02  21
  -4  -1   5 63467.2 3540.81  30
   4   1   6 62527.1 3385.27  29
   4  -1   6 70134.7 3704.82  29
  -4   1   6 64020.7 4201.70  38
   4  -1   6 62795.3 3232.76  35
  -4   1   6 64610.1 3218.99  36
  -4   1   6 64656.3 3256.21  21
  -4  -1   6 60832.3 3347.62  30
   4  -1   7 93296.7 4793.06  34
  -4  -1   7 95347.1 5020.11  30
  -4   1   7 105190. 5905.17  38
   4  -1   7 93450.6 4818.02  35
  -4   1   7 97587.8 4801.88  36
   4   1   7 98768.9 5049.33  29
   4  -1   7 100422. 5293.32  29
  -4  -1   7 99830.2 4956.38  19
  -4  -1   7 102748. 6007.05   8
  -4  -1   8 83527.2 4851.42  30
   4  -1   8 93618.3 4592.17  34
   4  -1   8 93205.2 4617.18  35
  -4   1   8 89408.9 4583.75  36
  -4   1   8 98483.8 5682.99  38
   4   1   8 92789.7 4909.91  29
   4  -1   8 98025.2 5128.67  29
  -4  -1   8 90057.4 4719.21  19
  -4  -1   8 99159.6 5738.75   8
  -4  -1   9 186034. 9897.95  30
   4  -1   9 194462. 9537.23  34
   4  -1   9 193040. 9559.70  35
  -4   1   9 197674. 10632.3  38
  -4   1   9 193415. 9523.46  36
   4   1   9 205495. 10001.9  29
   4  -1   9 208491. 10144.7  29
  -4  -1   9 187903. 9647.90  19
   4  -1   9 189716. 9509.56  24
  -4  -1   9 217794. 10758.4   8
  -4  -1  10 72972.2 4217.15  30
   4  -1  10 77156.5 3805.39  34
   4   1  10 71216.6 3924.20  34
  -4   1  10 78791.2 4853.81  38
   4  -1  10 73279.3 3819.70  35
  -4   1  10 75546.9 3779.43  36
   4   1  10 80905.6 4373.58  29
   4  -1  10 80454.9 4416.76  29
  -4  -1  10 71608.1 3887.64  19
   4  -1  10 73879.8 3771.12  24
  -4  -1  10 78253.4 4789.17   8
  -4  -1  11 32715.6 2595.24   8
   4  -1  11 33790.5 1817.76  34
  -4  -1  11 31304.3 2224.05  30
   4   1  11 33901.3 1949.46  34
  -4   1  11 36281.3 2733.58  38
  -4   1  11 34176.3 1785.26  36
   4  -1  11 31837.9 1828.93  35
   4   1  11 36966.2 2494.23  29
   4  -1  11 35154.2 2407.88  29
   4  -1  11 32168.8 1779.30  24
  -4  -1  11 33832.2 1891.11  19
  -4  -1  12 85189.2 4980.17   8
   4  -1  12 76182.7 4015.98  34
  -4  -1  12 79903.3 4509.28  30
   4   1  12 79063.7 4104.41  34
  -4   1  12 81581.8 5069.24  38
  -4   1  12 76739.7 3972.13  36
   4  -1  12 78045.8 4044.02  35
   4   1  12 77179.9 4809.76  29
   4  -1  12 82828.3 4765.85  29
   4  -1  12 77822.7 3985.05  24
  -4  -1  12 82117.6 4116.40  20
  -4  -1  12 76151.2 4062.02  19
  -4  -1  13 61718.9 3944.58   8
  -4   1  13 65380.0 4180.35  38
  -4   1  13 57417.1 3050.36  36
   4  -1  13 60323.0 3145.32  35
   4  -1  13 58284.0 3113.32  34
  -4  -1  13 59424.8 3591.31  30
   4   1  13 58656.0 3146.82  34
   4   1  13 50308.7 3892.20  29
   4  -1  13 66990.9 3970.62  29
  -4  -1  13 61557.0 3215.73  20
   4  -1  13 58455.6 3077.07  24
  -4  -1  13 57863.9 3130.80  19
  -4  -1  14 105637. 5867.51   8
  -4   1  14 107657. 6096.99  38
   4  -1  14 97930.7 5040.51  35
   4  -1  14 97537.3 5018.17  34
  -4  -1  14 100974. 5520.65  30
   4   1  14 99890.5 5013.09  34
  -4  -1  14 89355.7 4988.93  14
  -4  -1  14 91736.2 4980.46  13
   4   1  14 87604.1 6006.95  29
   4  -1  14 115824. 6099.58  29
  -4  -1  14 101137. 5127.47  20
  -4  -1  14 100697. 5014.01  19
  -4  -1  15 93670.3 5342.18   8
  -4   1  15 91185.3 5562.27  38
   4  -1  15 85453.5 4596.06  35
   4  -1  15 84173.0 4572.50  34
  -4  -1  15 85244.2 5047.40  30
  -4   1  15 93239.0 4568.57  33
   4   1  15 92508.6 4550.11  34
  -4  -1  15 80269.6 4501.45  13
  -4  -1  15 85532.4 4519.97  10
   4   1  15 90109.1 5869.50  29
   4  -1  15 96686.3 5670.64  29
  -4  -1  15 94135.0 4726.25  20
  -4  -1  15 87794.6 4540.69  19
  -4  -1  16 51435.7 3387.38   8
  -4   1  16 53875.6 3685.01  38
   4  -1  16 50611.2 2825.15  35
   4  -1  16 48319.2 2790.68  34
  -4  -1  16 49432.4 3233.90  30
  -4   1  16 50543.9 2770.21  33
   4   1  16 53524.9 2737.50  34
  -4  -1  16 52154.7 2738.92  10
  -4  -1  16 48389.7 2695.19  13
   4   1  16 52605.0 3945.82  29
   4  -1  16 50684.1 3807.82  29
  -4  -1  16 47899.0 2858.19  20
  -4  -1  16 50920.5 2733.30  19
   4  -1  17 91834.2 4741.36  35
  -4   1  17 84540.5 5499.29  38
   4  -1  17 87949.4 4705.85  34
  -4  -1  17 86636.8 5146.79  30
  -4   1  17 91411.5 4686.25  33
   4   1  17 90837.1 4593.72  34
  -4  -1  17 86610.7 4562.42  13
  -4  -1  17 85945.0 4621.16  10
   4   1  17 92507.7 5793.97  29
   4  -1  17 97270.7 6031.37  29
  -4   1  17 99066.2 4698.89  20
  -4  -1  17 80716.0 4707.38  20
  -4  -1  17 88114.4 4602.53  19
   4  -1  18 59270.7 3225.16  35
   4  -1  18 60569.3 3213.13  34
  -4   1  18 58398.6 3190.29  33
  -4  -1  18 55226.1 3617.53  30
   4   1  18 57473.4 3057.62  34
  -4  -1  18 54857.8 3113.68  10
  -4  -1  18 54726.7 3022.54  13
   4   1  18 54296.2 4025.83  29
   4  -1  18 50634.9 4286.83  29
  -4   1  18 61475.8 3192.56  20
  -4  -1  18 58810.1 3084.89  19
   4  -1  19 77495.4 4103.10  35
   4  -1  19 79184.9 4092.06  34
  -4   1  19 83205.9 4177.26  33
  -4  -1  19 70665.3 4528.48  30
   4   1  19 75150.6 3958.30  34
  -4   1  19 73905.7 4897.31  30
  -4  -1  19 71861.9 3916.74  13
  -4  -1  19 68874.9 4023.01  10
   4   1  19 78125.0 5020.70  29
   4  -1  19 86651.4 5772.44  29
  -4   1  19 80879.9 4147.37  20
  -4  -1  19 78492.6 3990.07  19
  -4  -1  20 62484.8 4115.32  30
  -4   1  20 66054.7 4461.39  30
   4  -1  20 68158.8 3648.38  34
  -4   1  20 66428.5 3685.60  33
   4   1  20 67551.1 3544.50  34
  -4  -1  20 64502.0 3498.84  13
  -4  -1  20 62764.0 3643.74  10
   4   1  20 64595.2 4475.35  29
   4  -1  20 74039.2 5094.62  29
  -4   1  20 73858.5 3803.56  20
  -4   1  20 70840.2 3690.15  19
   4  -1  20 71880.4 3679.04  35
   4  -1  21 18400.2 1223.70  34
  -4   1  21 15615.9 1780.35  30
  -4  -1  21 16470.1 1623.16  30
  -4   1  21 19139.9 1267.00  33
   4   1  21 19340.1 1162.61  34
  -4  -1  21 17552.9 1102.58  13
  -4  -1  21 15824.4 1203.96  10
   4   1  21 20235.7 1965.67  29
   4  -1  21 16429.2 2089.13  29
  -4   1  21 19361.7 1255.12  19
  -4   1  21 18942.1 1319.77  20
   4  -1  21 19095.5 1236.93  35
   4  -1  22 31521.7 1791.77  35
   4   1  22 30848.5 1733.94  35
   4  -1  22 31056.5 1778.42  34
  -4   1  22 29810.5 2519.76  30
  -4  -1  22 26181.4 2220.33  30
  -4   1  22 27557.4 1776.42  33
   4   1  22 30063.8 1704.70  34
  -4  -1  22 27479.3 1762.42  10
  -4  -1  22 29311.2 1655.29  13
   4   1  22 30790.7 2536.55  29
   4  -1  22 30337.3 2813.28  29
  -4   1  22 28352.9 1837.23  20
  -4   1  22 29357.1 1785.57  19
   4   1  23 41336.1 2265.49  35
   4  -1  23 44489.1 2331.20  35
   4  -1  23 43389.6 2316.21  34
  -4   1  23 37519.4 3009.67  30
  -4  -1  23 34501.6 2763.61  30
   4   1  23 41035.5 2245.54  34
  -4  -1  23 41158.1 2196.75  13
  -4  -1  23 34924.3 2264.94  10
   4   1  23 41254.3 3091.58  29
   4  -1  23 41496.9 3368.22  29
  -4   1  23 40334.2 2376.36  20
  -4   1  23 41223.1 2322.51  19
   4   1  24 34873.8 1894.70  35
   4  -1  24 33102.0 1915.84  35
   4  -1  24 33580.0 1915.09  34
  -4  -1  24 28914.2 2395.84  30
  -4   1  24 32228.0 2637.36  30
   4   1  24 33042.3 1867.89  34
  -4  -1  24 28669.0 1880.21  10
  -4  -1  24 32433.6 1808.34  13
   4   1  24 32467.3 2654.16  29
   4  -1  24 37464.0 2977.18  29
  -4   1  24 32942.4 1979.45  20
  -4   1  24 35730.8 1949.15  19
   4   1  25 53025.0 2775.78  35
   4  -1  25 50106.1 2783.89  34
  -4   1  25 47820.1 3522.17  30
  -4  -1  25 47822.6 3370.50  30
   4   1  25 53355.0 2765.41  34
  -4  -1  25 49319.5 2777.26  10
   4   1  25 47497.4 3522.10  29
   4  -1  25 50864.8 3804.22  29
  -4   1  25 50744.9 2851.01  20
  -4   1  25 52916.6 2810.99  19
   4  -1  26 47876.6 2557.54  34
  -4  -1  26 38909.9 3047.34  30
  -4   1  26 46250.9 3294.13  30
   4   1  26 45920.0 2517.89  34
  -4  -1  26 44980.3 2530.90  10
   4   1  26 43804.4 3276.37  29
   4  -1  26 41755.6 3383.59  29
   4   1  26 48311.9 2544.33  35
  -4   1  26 49829.9 2575.71  19
   4   1  27 49695.9 2604.13  35
   4   1  27 49741.0 2593.91  34
   4  -1  27 47604.4 2605.36  34
  -4   1  27 46360.8 3329.55  30
  -4  -1  27 45339.2 2576.94  10
   4   1  27 44438.9 3292.57  29
   4  -1  27 42162.0 3393.51  29
  -4  -1  27 45551.8 3199.08  30
   4  -1  27 47902.7 2592.85  24
  -4   1  27 50412.2 2621.50  19
   4   1  28 45090.3 2365.30  35
   4   1  28 44833.9 2354.20  34
   4  -1  28 44725.4 2370.82  34
  -4   1  28 36737.9 2959.96  30
  -4  -1  28 39565.7 2324.85  10
   4   1  28 43369.9 3083.05  29
   4  -1  28 41922.4 3188.63  29
  -4  -1  28 36731.0 2852.92  30
   4  -1  28 43768.6 2351.64  24
  -4   1  28 45675.5 2372.74  19
   4   1  29 18818.4 1169.73  35
  -4  -1  29 18863.0 1153.80  10
   4   1  29 20925.1 1183.89  34
   4  -1  29 18861.2 1175.73  34
   4  -1  29 19070.7 1167.26  24
  -4   1  29 18974.6 1166.52  19
  -4  -1  30 20275.6 1188.29  10
   4   1  30 20742.9 1222.01  35
   4  -1  30 20025.4 1206.70  24
   4   1  30 20541.9 1213.51  34
   4  -1  30 20836.4 1223.83  34
  -4  -1  31 17136.1 1021.58  10
   4  -1  31 17361.8 1053.72  35
   4   1  31 18339.5 1063.92  35
   4  -1  31 16671.1 1040.90  24
   4   1  31 16966.7 1046.60  34
   4  -1  31 18780.6 1070.98  34
  -4  -1  32 8757.20 567.197  10
   4  -1  32 8265.52 584.759  35
   4   1  32 8365.22 590.313  35
   4  -1  32 7503.08 571.451  24
   4   1  32 8103.26 581.668  34
   4  -1  32 9046.10 604.347  34
  -4  -1  33 26519.2 1364.75  10
  -4   1  33 26370.6 1378.40  12
   4  -1  33 24208.1 1384.26  35
   4   1  33 25312.3 1397.57  35
   4  -1  33 24037.5 1376.57  24
   4   1  33 24727.8 1387.28  34
  -4  -1  34 27839.8 1487.81  10
  -4   1  34 28513.5 1507.30  12
   4   1  34 29058.8 1531.35  35
   4  -1  34 28766.3 1521.58  35
   4  -1  34 27633.3 1511.78  24
   4   1  34 28637.9 1523.00  34
  -4  -1  35 26810.3 1473.51  10
  -4   1  35 28348.8 1497.27  12
   4  -1  35 29380.4 1513.98  35
   4   1  35 30885.0 1528.05  35
   4  -1  35 28524.2 1505.87  24
   4   1  35 29255.6 1516.05  34
  -4   1  36 16271.3 810.208  12
   4   1  36 16217.4 830.777  35
  -4   1  37 3680.84 241.169  12
   4  -2 -34 16831.9 928.736   1
  -4   2 -34 18688.8 996.340  37
   4  -2 -33 15632.2 872.942   1
  -4   2 -33 15994.1 929.428  37
   4  -2 -32 16015.8 925.018   1
  -4   2 -32 17063.5 987.934  37
   4  -2 -31 13124.2 789.714   1
  -4   2 -31 12931.6 836.496  37
   4  -2 -30 7830.54 552.027   1
   4  -2 -29 18608.3 1107.28   1
   4  -2 -28 27811.4 1585.32   1
   4  -2 -27 34279.6 1932.38   1
   4  -2 -26 40315.4 2262.40   1
   4  -2 -25 17279.0 1163.39   1
   4  -2 -24 11700.6 931.349   1
   4  -2 -24 13081.1 1744.51  31
  -4  -2 -23 21722.7 1313.75  23
   4  -2 -23 21958.5 1482.95   1
   4  -2 -23 25492.5 2559.86  31
  -4  -2 -22 24177.7 1412.36  23
   4  -2 -22 21871.4 1579.93   1
   4  -2 -22 23676.8 2613.67  31
  -4   2 -21 47957.5 2608.52  22
  -4  -2 -21 49273.8 2620.75  23
   4  -2 -21 42228.3 2797.08   1
   4  -2 -20 43676.9 2689.39   1
   4  -2 -20 45113.6 3869.08  31
  -4  -2 -20 45185.5 2385.51  23
  -4   2 -20 43972.5 2374.28  22
  -4  -2 -20 37848.2 2260.73   6
   4  -2 -19 24182.9 1663.89   1
   4  -2 -19 24786.9 2607.34  31
  -4  -2 -19 22373.2 1451.88  23
  -4   2 -19 23819.9 1456.19  22
  -4  -2 -19 21276.7 1338.42   6
   4  -2 -18 41642.1 2535.20   1
   4  -2 -18 41879.5 3517.54  31
  -4   2 -18 42880.4 2384.95  22
  -4  -2 -18 44658.9 2451.04  23
  -4  -2 -18 39771.8 2288.61   6
   4  -2 -17 51401.1 2837.74   1
   4  -2 -17 50611.5 3785.97  31
  -4  -2 -17 51776.2 2773.45  23
  -4   2 -17 48108.6 2694.15  22
  -4  -2 -17 45812.9 2630.40   6
   4  -2 -16 85617.9 3989.97   1
   4  -2 -16 87709.8 5052.05  31
  -4   2 -16 70001.8 3824.20  22
  -4  -2 -16 71757.1 3877.66  23
  -4  -2 -16 65713.7 3784.26   6
  -4   2 -15 57588.8 3171.96  22
  -4  -2 -15 56946.4 3208.91  23
   4  -2 -15 67247.7 4184.76  31
   4  -2 -15 62635.1 3258.28   1
   4  -2 -14 26728.6 1616.85   1
   4  -2 -14 26511.8 1668.10  39
  -4  -2 -14 26954.8 1616.09  23
  -4   2 -14 27460.5 1587.20  22
   4  -2 -13 25491.9 1520.30   1
  -4  -2 -13 28012.7 1750.35   2
   4  -2 -13 24601.9 1606.44  39
  -4  -2 -13 25488.2 1529.67  23
  -4   2 -13 27353.8 1510.24  22
  -4  -2 -12 31304.9 1945.40   2
   4  -2 -12 30253.0 1707.83   1
  -4  -2 -12 30649.6 1727.11  23
  -4   2 -12 29311.0 1684.43  22
  -4   2 -12 25643.1 2142.85  38
   4  -2 -11 86545.9 4996.25  28
  -4   2 -11 86489.4 4557.86  22
  -4  -2 -11 90429.0 4595.80  23
  -4  -2 -11 92382.1 4835.56   2
   4  -2 -11 90633.8 4574.08   1
   4  -2 -10 91057.8 4576.65  26
   4  -2 -10 86464.2 5041.12  28
   4  -2 -10 89453.4 4633.61   1
  -4  -2 -10 88739.4 4633.30   3
  -4  -2 -10 99068.7 4928.88   2
  -4   2 -10 88400.5 4629.02  22
  -4  -2 -10 95255.7 4668.36  23
  -4   2 -10 95310.2 5404.69  32
  -4   2  -9 69295.8 4181.98  32
  -4  -2  -9 68953.7 3500.78   3
  -4  -2  -9 70398.5 3768.28   2
   4  -2  -9 66298.2 3905.24  28
   4  -2  -9 65725.2 3443.40  26
  -4   2  -9 65644.8 3493.88  22
  -4  -2  -9 70678.9 3526.22  23
  -4  -2  -9 74882.3 4862.26   8
   4  -2  -8 71564.8 3964.29  28
   4  -2  -8 66758.2 3471.51  26
  -4  -2  -8 73992.3 4925.38   8
  -4   2  -8 66292.4 3516.67  22
  -4  -2  -8 71470.2 3546.45  23
  -4   2  -8 71814.7 4187.96  32
   4  -2  -7 24768.1 1778.43  28
   4  -2  -7 25942.9 1386.39  26
  -4  -2  -7 29638.5 2666.74   8
  -4   2  -7 23722.5 1412.49  22
  -4  -2  -7 26232.3 1440.30  23
  -4   2  -7 27792.7 1988.56  32
   4  -2  -6 60072.3 3340.44  28
  -4  -2  -6 57006.5 4312.83   8
  -4  -2  -6 59313.8 2920.82  23
  -4   2  -6 51765.5 2886.78  22
  -4   2  -6 57031.8 3472.59  32
  -4   2  -5 89388.7 5041.10  32
  -4  -2  -5 88779.1 4440.85  17
   4  -2  -5 90187.5 4914.53  28
  -4  -2  -5 88080.3 4491.03  23
  -4  -2  -5 86019.7 5987.20   8
  -4   2  -4 50837.4 3163.35  32
  -4  -2  -4 52625.6 2765.91  32
  -4  -2  -4 53640.1 2620.02  17
   4  -2  -4 48505.1 3047.41  28
  -4  -2  -4 48023.3 2658.18  23
  -4  -2  -4 48799.6 4050.55   8
  -4  -2  -3 85273.4 4503.51  32
  -4   2  -3 89716.2 4980.40  32
  -4  -2  -3 94707.1 4411.83  17
   4  -2  -3 81636.5 4404.97  25
   4  -2  -3 89035.2 4895.80  28
  -4  -2  -3 89932.4 4466.94  23
  -4  -2  -3 93434.7 6249.93   8
   4  -2  -2 94479.6 4719.23  25
  -4  -2  -2 95294.8 6561.26   8
  -4  -2  -2 96004.5 4767.26  23
  -4   2  -2 92065.4 4732.05  21
  -4  -2  -2 97567.9 4701.30  22
  -4  -2  -2 90277.1 4766.03  32
  -4   2  -2 96436.5 5270.81  32
   4  -2  -1 58405.8 3038.62  25
  -4  -2  -1 55752.6 4717.32   8
  -4  -2  -1 59024.4 3083.85  23
  -4   2  -1 61808.0 3061.27  21
  -4   2  -1 62891.2 3581.16  32
   4  -2   0 88103.1 4459.88  25
  -4  -2   0 92491.1 6507.38   8
  -4  -2   0 91942.4 4510.34  23
  -4   2   0 86849.3 4470.28  21
  -4   2   0 92228.9 5003.31  32
   4  -2   1 65156.0 3428.17  25
  -4  -2   1 65747.4 5165.32   8
  -4   2   1 67595.2 3942.53  32
  -4  -2   1 71707.8 3489.06  23
  -4   2   1 67884.1 3447.34  21
   4  -2   2 79263.1 3959.57  25
  -4  -2   2 79034.0 4006.08  23
  -4   2   2 76367.8 3966.73  21
  -4   2   2 82280.7 4512.61  32
  -4  -2   3 88221.1 4391.52  23
  -4   2   3 84092.1 4350.12  21
  -4   2   3 88588.2 4896.59  32
  -4  -2   4 53676.2 4092.52   8
  -4  -2   4 48849.9 2569.42  23
  -4   2   4 47932.6 2534.36  21
  -4  -2   4 48961.1 2479.72  17
  -4   2   4 46132.9 3454.77  38
  -4  -2   5 76768.7 5428.71   8
  -4  -2   5 71157.2 4064.37  20
  -4  -2   5 80774.9 3931.74  17
  -4   2   5 81284.6 5041.19  38
   4  -2   5 79877.0 3979.77  35
  -4  -2   6 75779.8 5031.14   8
  -4  -2   6 65585.6 3659.49  20
  -4  -2   6 72810.3 3497.70  17
  -4  -2   6 65763.9 3539.56  19
   4  -2   6 68831.1 3539.52  35
  -4   2   6 77865.6 4687.19  38
  -4  -2   7 24492.2 2419.87   8
   4  -2   7 22127.5 1251.80  24
  -4  -2   7 23070.1 1427.87  20
  -4  -2   7 22620.1 1222.30  17
  -4  -2   7 20514.9 1280.03  19
   4  -2   7 23478.6 1278.46  35
  -4   2   7 23859.2 2134.46  38
  -4  -2   8 63477.4 4499.19   8
   4  -2   8 62441.3 3269.48  35
  -4   2   8 60170.3 4223.85  38
   4  -2   8 65130.4 3254.80  24
  -4  -2   8 56069.1 3381.87  20
  -4  -2   8 64453.7 3222.14  17
  -4  -2   8 66422.2 3318.91  19
  -4  -2   9 53686.7 3941.14   8
   4  -2   9 55207.0 2792.12  35
  -4   2   9 53862.5 3759.99  38
  -4  -2   9 46511.3 2868.18  20
   4  -2   9 57225.7 2771.63  24
   4  -2   9 50625.2 2711.35  18
  -4  -2   9 56740.3 2834.30  19
  -4  -2   9 45260.5 2881.92  13
  -4  -2   9 56352.8 2769.66  10
   4  -2  10 89654.5 4475.75  35
  -4   2  10 85452.8 5488.01  38
  -4  -2  10 87551.0 4443.69  10
  -4  -2  10 89463.6 4436.60  12
  -4  -2  10 90367.3 4498.04  14
   4  -2  10 88957.4 4444.37  24
  -4  -2  10 75475.8 4536.35  20
   4  -2  10 86298.4 4397.05  18
  -4  -2  10 89722.3 4499.71  19
  -4   2  11 77000.2 4951.89  38
   4  -2  11 73822.3 3902.52  35
   4   2  11 78016.5 3923.07  34
  -4  -2  11 80324.4 3891.94  10
  -4  -2  11 77822.4 3868.98  12
  -4  -2  11 76298.9 3926.65  14
  -4  -2  11 64019.2 4063.00  30
  -4  -2  11 71241.0 3979.43  20
   4  -2  11 78126.9 3881.95  24
   4  -2  11 73214.0 3829.87  18
  -4  -2  11 75878.3 3914.57  19
  -4   2  12 20977.7 2123.14  38
   4  -2  12 24754.2 1378.73  35
   4   2  12 23601.4 1365.02  34
  -4  -2  12 24272.1 1344.49  10
  -4  -2  12 21069.9 1386.50  13
  -4  -2  12 21506.4 1359.35  14
  -4  -2  12 23164.8 1320.48  12
   4  -2  12 24573.5 2067.90  29
  -4  -2  12 17435.8 1511.54  30
  -4  -2  12 20423.5 1397.01  20
   4  -2  12 24727.7 1350.59  24
   4  -2  12 22482.9 1293.46  18
  -4  -2  12 25097.4 1375.14  19
  -4  -2  12 22057.9 1253.57  18
  -4  -2  13 30272.8 1652.00   9
  -4   2  13 27991.2 2572.71  38
   4  -2  13 31900.5 1754.08  35
   4  -2  13 25414.0 1769.76  39
   4   2  13 32214.0 1724.86  34
  -4  -2  13 28077.3 1742.42  13
  -4  -2  13 31646.8 1720.11  10
  -4  -2  13 31667.5 1697.50  12
  -4  -2  13 27330.3 1723.93  14
   4  -2  13 32939.9 2542.37  29
  -4  -2  13 23178.2 1935.85  30
  -4  -2  13 28671.0 1766.78  20
   4  -2  13 34635.4 1742.98  24
   4  -2  13 29423.0 1666.63  18
  -4  -2  13 31632.8 1725.82  19
  -4  -2  14 20154.9 1220.17   9
  -4   2  14 15722.0 1908.55  38
   4  -2  14 18998.4 1337.39  39
   4  -2  14 20536.5 1319.28  35
   4   2  14 21368.3 1277.83  34
  -4  -2  14 20847.1 1305.51  13
  -4  -2  14 22046.6 1298.51  10
  -4  -2  14 21770.2 1274.27  12
  -4  -2  14 22193.6 1334.99  14
   4  -2  14 23429.3 2154.12  29
  -4  -2  14 16429.7 1538.30  30
  -4  -2  14 21479.0 1346.53  20
   4  -2  14 22944.9 1312.77  24
   4  -2  14 20788.4 1260.12  18
  -4  -2  14 22718.5 1296.78  19
  -4  -2  15 52731.5 2974.06   9
   4  -2  15 56687.1 3107.00  35
  -4   2  15 53604.3 4002.93  38
   4  -2  15 49689.9 3052.49  39
   4   2  15 56709.0 3022.06  34
  -4  -2  15 58391.4 3062.89  13
  -4  -2  15 56098.2 3093.48  14
  -4  -2  15 60588.1 3073.53  10
  -4  -2  15 61564.7 3051.92  12
   4  -2  15 63260.4 4193.22  29
  -4  -2  15 58044.6 3550.32  30
  -4  -2  15 57032.1 3101.70  20
   4  -2  15 60286.0 3096.85  24
   4  -2  15 58618.2 3047.14  18
  -4   2  16 76001.3 5169.95  38
   4  -2  16 81488.5 4205.29  35
  -4   2  16 81742.9 4211.74  33
   4   2  16 76368.7 4076.87  34
  -4  -2  16 79469.1 4114.31  12
  -4  -2  16 77009.0 4172.17  14
  -4  -2  16 82541.6 4156.82  10
  -4  -2  16 75365.4 4097.41  13
   4  -2  16 77777.6 5288.10  29
  -4  -2  16 66170.5 4572.57  30
   4  -2  16 82008.8 4184.54  24
   4  -2  16 81559.8 4142.36  18
  -4   2  17 42470.4 3348.33  38
  -4   2  17 45811.3 2486.39  33
   4   2  17 41894.6 2319.80  34
  -4  -2  17 42062.9 2333.33  13
  -4  -2  17 40811.5 2396.73  14
  -4  -2  17 42060.1 2362.24  12
  -4  -2  17 44329.7 2415.93  10
   4  -2  17 46943.7 3664.91  29
  -4  -2  17 37119.5 2884.70  30
   4  -2  17 46749.9 2471.21  24
   4  -2  17 39577.7 2383.67  18
  -4   2  18 37124.5 3143.34  38
  -4   2  18 37484.9 2239.56  34
  -4   2  18 41842.7 2419.37  33
   4   2  18 40596.8 2244.40  34
  -4  -2  18 42283.4 2259.39  13
  -4  -2  18 40627.4 2329.73  14
  -4  -2  18 42028.5 2361.27  10
  -4  -2  18 43910.3 2330.75  12
   4  -2  18 43596.8 3646.78  29
  -4  -2  18 35152.4 2825.48  30
  -4   2  18 43664.0 2374.34  20
   4  -2  18 42316.2 2401.31  24
   4  -2  18 38099.8 2336.37  18
  -4   2  19 15673.6 1886.31  38
  -4   2  19 22619.0 1480.05  33
  -4   2  19 18691.7 1252.63  34
   4   2  19 22054.7 1283.48  34
  -4  -2  19 21427.8 1391.54  10
  -4  -2  19 20593.7 1344.75  12
  -4  -2  19 22071.1 1284.99  13
   4  -2  19 23013.0 2568.09  29
  -4  -2  19 17883.2 1781.55  30
  -4   2  19 23700.0 1449.28  20
   4  -2  19 22014.9 1462.31  24
   4  -2  19 19394.3 1398.22  18
  -4   2  20 31351.0 2738.21  38
  -4   2  20 37488.0 2205.68  33
  -4   2  20 33258.5 1910.06  34
   4   2  20 34745.5 1937.87  34
  -4  -2  20 34108.9 2066.11  10
  -4  -2  20 34493.3 1926.67  13
  -4  -2  20 35098.9 2032.78  12
   4  -2  20 37354.8 3501.24  29
  -4  -2  20 28214.5 2467.59  30
   4  -2  20 38907.6 2183.98  24
  -4   2  20 39045.7 2173.28  20
   4  -2  20 29318.6 2060.02  18
  -4   2  21 50904.0 2827.63  33
  -4   2  21 44121.0 2478.12  34
   4   2  21 46195.9 2523.85  34
  -4  -2  21 47270.8 2659.31  10
  -4  -2  21 48220.1 2518.45  13
  -4  -2  21 45891.3 2615.66  12
   4  -2  21 48207.4 4021.28  29
  -4  -2  21 42337.6 3156.51  30
   4  -2  21 50494.1 2760.61  24
  -4   2  21 43431.4 2655.68  20
   4  -2  21 46790.4 2710.05  18
  -4   2  22 26651.6 1738.56  33
  -4   2  22 24215.4 1461.10  34
   4   2  22 27273.4 1530.00  34
  -4   2  22 28161.4 2534.27  30
  -4  -2  22 25114.7 1619.41  10
  -4  -2  22 26254.0 1501.96  13
  -4  -2  22 25789.5 1596.08  12
   4  -2  22 23330.5 2640.54  29
  -4  -2  22 23041.2 2096.79  30
  -4   2  22 25852.6 1632.49  20
  -4   2  22 28186.6 1666.23  19
   4  -2  22 27844.1 1698.39  24
   4  -2  22 23880.7 1626.00  18
  -4   2  23 19703.9 2013.09  30
  -4   2  23 17758.3 1269.44  33
  -4   2  23 15865.4 1027.67  34
   4   2  23 15898.8 1073.43  34
  -4  -2  23 19105.1 1088.52  13
  -4  -2  23 18398.9 1179.32  12
  -4  -2  23 17555.8 1188.01  10
   4   2  23 16496.4 1670.57  29
   4  -2  23 18831.6 2172.81  29
  -4  -2  23 13163.4 1505.90  30
   4  -2  23 20595.5 1262.32  24
  -4   2  23 16690.7 1162.02  20
   4  -2  23 15390.5 1156.56  18
  -4   2  23 18291.5 1205.64  19
  -4   2  24 17380.2 1830.44  30
  -4   2  24 15006.3 1134.75  33
  -4   2  24 14367.7 924.283  34
   4   2  24 16079.6 1006.08  34
  -4  -2  24 15121.8 963.571  13
  -4  -2  24 16038.8 1080.33  10
  -4  -2  24 15545.1 1053.64  12
   4   2  24 14804.7 1561.18  29
   4  -2  24 14825.8 1876.34  29
   4  -2  24 15070.5 1087.57  24
  -4   2  24 14577.0 1043.74  20
   4  -2  24 15064.7 1054.24  18
  -4   2  24 16215.8 1080.70  19
   4  -2  25 17521.9 1119.11  35
  -4   2  25 16141.0 1751.18  30
   4   2  25 17273.4 1066.67  34
  -4  -2  25 17435.3 1031.59  13
  -4  -2  25 14967.5 1094.30  10
  -4  -2  25 18344.8 1119.06  12
   4   2  25 13447.5 1517.40  29
   4  -2  25 14779.1 1831.65  29
   4  -2  25 16584.8 1132.23  24
   4  -2  25 15974.4 1086.58  18
  -4   2  25 17185.2 1119.25  19
   4  -2  26 33960.6 1933.09  35
   4   2  26 34077.9 1902.65  35
  -4   2  26 32869.3 2709.47  30
   4   2  26 33203.9 1890.65  34
  -4  -2  26 30357.8 1912.70  10
  -4  -2  26 36087.2 1862.19  13
  -4  -2  26 35556.4 1926.35  12
   4  -2  26 34476.7 2905.85  29
   4  -2  26 36133.4 1969.78  24
   4  -2  26 30864.9 1885.30  18
  -4   2  26 35714.5 1944.04  19
   4  -2  27 31626.8 1794.11  35
   4   2  27 33003.8 1781.28  35
  -4   2  27 29377.8 2487.84  30
   4   2  27 31184.3 1760.25  34
  -4  -2  27 30613.2 1781.92  10
  -4  -2  27 32889.9 1722.25  13
  -4  -2  27 32988.1 1790.83  12
   4  -2  27 33237.9 2695.99  29
   4  -2  27 32646.7 1816.06  24
   4  -2  27 27599.8 1731.59  18
  -4   2  27 31368.9 1782.77  19
   4   2  28 21922.7 1343.26  34
   4  -2  28 23413.5 1371.91  35
   4   2  28 24645.9 1371.80  35
  -4  -2  28 24292.5 1374.36  10
  -4  -2  28 26745.2 1388.85  12
   4  -2  28 23524.6 1385.25  24
  -4   2  28 22064.1 1347.50  19
  -4  -2  28 21143.6 1309.90  18
   4   2  29 14743.3 924.071  34
   4  -2  29 14568.8 932.703  35
   4   2  29 14891.9 933.129  35
  -4  -2  29 15750.9 939.609  10
  -4  -2  29 16498.9 944.586  12
   4  -2  29 15650.3 957.656  24
  -4   2  29 14506.2 917.845  19
  -4  -2  29 12970.2 878.803  18
   4   2  30 6183.20 480.203  34
   4   2  30 6432.87 485.584  35
   4  -2  30 6040.93 479.554  35
  -4  -2  30 6214.80 484.369  10
  -4  -2  30 6623.79 489.921  12
   4  -2  30 6418.09 509.333  24
  -4  -2  30 5349.34 436.027  18
  -4   2  30 5412.73 449.363  19
  -4  -2  31 14483.5 856.600  12
  -4  -2  31 14425.2 858.514  10
   4   2  31 14241.8 859.957  34
   4  -2  31 14685.2 880.768  24
   4  -2  31 13038.2 849.519  35
   4   2  31 14300.8 867.266  35
  -4   2  32 10696.3 693.702  12
  -4  -2  32 12660.6 738.157  10
  -4  -2  32 13039.3 737.566  12
   4   2  32 12218.3 738.076  34
   4  -2  32 11177.3 739.117  24
   4  -2  32 12592.3 739.814  35
   4   2  32 12437.4 748.408  35
  -4  -2  33 14957.3 801.583  10
  -4  -2  33 15477.2 800.535  12
   4   2  33 14343.4 803.262  34
   4  -2  33 14044.0 812.669  24
   4   2  33 14119.8 809.636  35
   4  -2  33 13270.2 791.873  35
  -4  -2  34 17790.7 878.430  10
  -4  -2  34 17987.1 876.354  12
   4   2  34 16166.0 880.008  34
   4  -2  34 15503.0 881.930  24
   4   2  34 17300.9 893.975  35
   4  -2  34 15363.8 867.725  35
  -4  -2  35 9050.81 503.006  12
  -4  -2  35 8350.77 500.437  10
  -4  -2  36 8918.55 486.007  10
   4  -3 -33 3712.57 261.001   1
  -4   3 -32 3288.26 270.537  37
   4  -3 -32 2887.60 248.521   1
  -4   3 -31 2635.79 261.542  37
   4  -3 -31 2561.49 248.557   1
  -4   3 -30 14123.1 864.749  37
   4  -3 -30 14319.6 841.564   1
  -4   3 -29 11976.6 793.396  37
   4  -3 -29 12668.4 778.431   1
  -4   3 -28 11469.2 789.949  37
   4  -3 -28 12292.2 786.533   1
  -4   3 -27 10772.8 774.581  37
   4  -3 -27 10858.6 760.806   1
  -4   3 -26 8261.94 637.484  37
   4  -3 -26 8632.40 640.033   1
  -4  -3 -25 11280.8 778.281  23
  -4   3 -25 12735.5 901.783  37
   4  -3 -25 12675.7 903.401   1
   4  -3 -24 14858.0 1847.04  31
  -4  -3 -24 11584.5 859.335  23
  -4   3 -24 14193.1 1003.94  37
   4  -3 -24 16024.9 1047.56   1
  -4   3 -23 9429.16 1357.84  32
   4  -3 -23 10842.7 1660.92  31
  -4  -3 -23 10129.3 769.227  23
  -4   3 -23 12790.0 935.787  37
   4  -3 -23 10975.2 923.477   1
  -4   3 -22 10454.0 1536.64  32
   4  -3 -22 12009.2 1821.29  31
  -4  -3 -22 12683.4 888.962  23
  -4   3 -22 13017.6 1024.89  37
   4  -3 -22 11970.9 1029.51   1
  -4   3 -21 9721.06 1520.95  32
   4  -3 -21 10229.1 1767.31  31
   4  -3 -21 11403.1 1045.18   1
  -4  -3 -21 10276.2 821.480  23
  -4   3 -21 11859.4 1001.71  37
  -4   3 -20 13279.0 1810.97  32
   4  -3 -20 10194.6 1797.99  31
   4  -3 -20 12662.8 1150.29   1
   4  -3 -20 9602.58 864.051  27
  -4  -3 -20 11960.4 889.201  23
  -4   3 -20 11829.3 1003.07  37
  -4   3 -19 17669.1 1234.31  37
  -4   3 -19 13473.3 1840.97  32
   4  -3 -19 16962.2 2194.88  31
   4  -3 -19 16475.5 1315.45   1
   4  -3 -19 15659.1 1103.63  27
  -4  -3 -19 17344.7 1142.29  23
  -4  -3 -19 13101.0 935.371   6
  -4   3 -18 27874.9 1766.31  37
   4  -3 -18 27157.3 2838.45  31
  -4   3 -18 24686.8 2603.04  32
   4  -3 -18 28553.9 1840.33   1
   4  -3 -18 25606.4 1649.42  27
  -4  -3 -18 28783.0 1743.05  23
  -4  -3 -18 26244.3 1547.06   6
  -4   3 -17 26142.0 1654.36  37
   4  -3 -17 26440.0 2648.95  31
  -4   3 -17 23415.4 2447.78  32
   4  -3 -17 26504.1 1701.50   1
   4  -3 -17 25422.9 1559.45  27
  -4  -3 -17 26258.9 1648.07  23
  -4  -3 -17 23342.7 1462.48   6
  -4   3 -16 41124.1 2305.07  37
   4  -3 -16 39717.3 3311.87  31
  -4   3 -16 38809.3 3206.12  32
   4  -3 -16 40616.7 2324.90   1
   4  -3 -16 41957.3 2226.79  27
  -4  -3 -16 36735.4 2259.99  23
  -4  -3 -16 34647.1 2126.38   6
  -4   3 -15 36962.1 3016.94  32
   4  -3 -15 38375.5 3104.03  31
  -4   3 -15 35238.1 2100.40  37
   4  -3 -15 36963.3 2122.05   1
  -4  -3 -15 35301.2 2105.42  23
  -4  -3 -15 33594.7 1995.19   6
  -4  -3 -14 25610.6 1667.51   7
  -4  -3 -14 25754.9 1608.90   6
  -4   3 -14 25937.2 2430.27  32
   4  -3 -14 33381.4 2673.01  31
  -4   3 -14 30191.6 1703.92  37
   4  -3 -14 24156.7 1741.44  39
   4  -3 -14 28469.5 1683.77   1
  -4  -3 -14 27436.0 1680.85  23
   4  -3 -14 28480.9 2806.05  15
  -4   3 -13 38582.6 2158.73  37
   4  -3 -13 37704.0 2292.84  39
  -4   3 -13 36883.2 2931.23  32
   4  -3 -13 38383.6 2152.22   1
  -4  -3 -13 38415.9 2170.77  23
  -4  -3 -13 36091.1 2133.22   6
  -4  -3 -13 35228.1 2187.59   7
  -4   3 -12 4465.50 471.112  37
   4  -3 -12 3561.39 637.202  39
   4  -3 -12 4483.14 477.799   1
   4  -3 -12 4220.65 787.974  28
  -4  -3 -12 4347.02 495.952  23
  -4  -3 -12 4452.22 486.280   6
  -4  -3 -12 4469.77 547.709   7
  -4   3 -11 7395.11 621.586  37
   4  -3 -11 6704.62 830.628  39
  -4   3 -11 7070.51 1094.36  32
   4  -3 -11 7268.93 596.474   1
   4  -3 -11 7911.80 589.732  26
   4  -3 -11 7396.77 1024.19  28
  -4  -3 -11 7791.78 659.008  23
  -4  -3 -11 6436.72 653.087   6
  -4  -3 -11 7861.76 742.908   7
  -4   3 -10 28351.3 1615.87  37
   4  -3 -10 30987.2 1892.64  39
  -4   3 -10 25099.4 2205.16  32
   4  -3 -10 26164.1 1583.15   1
   4  -3 -10 27057.2 1553.18  26
   4  -3 -10 26305.2 2129.09  28
  -4  -3 -10 28596.5 1636.37  23
  -4  -3 -10 25980.7 1689.60   6
  -4  -3 -10 27371.9 1767.23   7
  -4   3  -9 38614.2 2111.30  37
   4  -3  -9 44069.6 2436.40  39
  -4   3  -9 37738.9 2765.90  32
   4  -3  -9 38189.3 2089.21   1
   4  -3  -9 37272.7 2667.08  28
   4  -3  -9 37855.7 2059.60  26
  -4  -3  -9 39199.4 2131.21  23
  -4   3  -9 34571.9 2024.86  21
  -4  -3  -9 37549.3 2205.27   6
  -4  -3  -9 38071.7 2301.22   7
  -4   3  -8 38028.4 2042.93  37
   4  -3  -8 37937.4 2344.09  39
  -4   3  -8 33517.8 2620.00  32
   4  -3  -8 36903.6 2022.39   1
   4  -3  -8 37928.6 2619.44  28
   4  -3  -8 36347.1 1992.87  26
  -4  -3  -8 37245.0 2054.94  23
  -4   3  -8 33922.7 1963.19  21
  -4  -3  -8 39653.3 2298.79   7
  -4  -3  -8 37492.8 2139.78   6
  -4   3  -7 30639.4 1681.07  37
   4  -3  -7 31595.8 2021.16  39
  -4   3  -7 30407.1 2285.92  32
   4  -3  -7 30001.8 1660.82   1
   4  -3  -7 28160.7 2204.19  28
   4  -3  -7 30201.1 1642.55  26
  -4  -3  -7 30947.7 1699.12  23
  -4   3  -7 26329.3 1601.76  21
  -4  -3  -7 29511.7 1913.70   7
  -4  -3  -7 28581.8 1751.54   6
  -4  -3  -6 30071.4 1957.48   7
  -4  -3  -6 33078.4 1805.85   6
  -4  -3  -6 28757.5 1673.54   3
  -4   3  -6 30862.7 1696.03  37
   4  -3  -6 31690.0 2076.57  39
  -4   3  -6 27569.4 2228.14  32
   4  -3  -6 29072.7 2228.73  28
   4  -3  -6 29914.6 1663.88  26
  -4  -3  -6 30683.2 1713.00  23
  -4   3  -6 28307.0 1632.87  21
  -4  -3  -6 30536.9 2862.60  15
  -4  -3  -6 30098.4 1647.71  17
  -4  -3  -5 14861.5 1243.44   7
  -4  -3  -5 17896.2 1095.49   6
  -4  -3  -5 15991.2 983.172   3
   4  -3  -5 19170.9 1471.73  39
  -4   3  -5 16979.6 1004.30  37
  -4   3  -5 17287.7 1540.55  32
  -4  -3  -5 14937.9 950.277  11
   4  -3  -5 14309.7 1427.18  28
   4  -3  -5 14503.1 956.121  26
  -4  -3  -5 15435.5 1003.43  23
  -4   3  -5 15452.7 945.842  21
  -4  -3  -5 15909.1 2066.87  15
  -4  -3  -5 16286.4 950.849  17
  -4  -3  -4 41974.5 2612.65   7
  -4  -3  -4 47372.5 2380.09   6
  -4  -3  -4 43024.5 2669.31   2
  -4  -3  -4 41885.7 2252.88   3
  -4   3  -4 42003.2 2267.41  37
   4  -3  -4 43504.6 2724.22  39
  -4   3  -4 40395.2 2837.05  32
  -4  -3  -4 40577.8 2217.69  10
  -4  -3  -4 41572.9 2236.23  11
   4  -3  -4 40494.3 2833.63  28
  -4  -3  -4 44029.9 2298.75  23
  -4   3  -4 38700.8 2215.31  21
  -4  -3  -4 44950.9 3778.86  15
  -4  -3  -4 43679.2 2228.01  17
  -4  -3  -3 44559.4 2283.80   6
  -4  -3  -3 42626.5 2582.39   7
  -4  -3  -3 38441.6 2559.75   2
  -4  -3  -3 40617.2 2173.29   3
   4  -3  -3 48815.6 2760.84  39
  -4   3  -3 40425.8 2782.04  32
  -4  -3  -3 37072.9 2133.19  10
  -4  -3  -3 39181.6 2155.21  11
   4  -3  -3 43368.6 2840.33  28
  -4  -3  -3 40635.0 2213.04  23
  -4   3  -3 38469.2 2149.51  21
  -4  -3  -3 47814.2 3916.31  15
  -4  -3  -3 43112.7 2154.66  17
  -4  -3  -2 37149.0 2297.27   7
  -4  -3  -2 38958.9 1970.78   6
  -4  -3  -2 32656.0 1847.93   3
  -4  -3  -2 31360.9 2229.52   2
   4  -3  -2 40457.3 2517.42  39
  -4   3  -2 32424.8 2410.40  32
  -4  -3  -2 34155.5 1847.61  11
  -4  -3  -2 31850.9 1824.30  10
   4  -3  -2 36437.9 2512.15  28
   4  -3  -2 35456.4 1873.09  25
  -4  -3  -2 34727.3 1903.10  23
  -4   3  -2 31710.2 1838.24  21
  -4  -3  -2 35624.7 3493.75  15
  -4  -3  -2 35427.7 1837.07  17
  -4  -3  -1 34748.2 2351.29   7
  -4  -3  -1 35399.4 2355.09   2
  -4  -3  -1 38497.8 1952.52   3
   4  -3  -1 39759.1 2563.60  39
  -4   3  -1 36106.6 2543.85  32
  -4  -3  -1 36537.0 1937.73  11
  -4  -3  -1 33009.8 1910.75  10
   4  -3  -1 35204.4 2558.94  28
   4  -3  -1 36615.1 1958.12  25
  -4  -3  -1 38601.9 2006.46  23
  -4   3  -1 33064.7 1930.01  21
  -4  -3  -1 37928.7 3780.23  15
  -4  -3  -1 37043.1 1923.04  17
  -4  -3   0 3253.05 578.205   7
  -4  -3   0 3261.05 613.162   2
  -4  -3   0 3297.40 318.652   3
  -4   3   0 3018.54 649.013  32
  -4  -3   0 3281.49 312.118  10
  -4  -3   0 2877.43 301.794  11
   4  -3   0 2597.36 312.980  25
   4  -3   0 2475.75 600.636  28
  -4  -3   0 3303.91 355.653  23
  -4   3   0 2838.75 315.514  21
  -4  -3   0 3809.85 305.336  17
  -4  -3   1 29580.3 1544.20  17
  -4  -3   1 27634.9 1541.33  10
  -4  -3   1 27440.8 1548.52  11
  -4  -3   1 26791.8 1546.46   3
  -4  -3   1 28732.1 2008.80   2
   4  -3   1 27033.2 1568.72  25
  -4  -3   1 28922.0 1612.84  23
  -4  -3   1 29836.1 1575.93   9
  -4  -3   2 36747.9 1932.00   6
  -4  -3   2 34827.3 1867.10   9
  -4   3   2 34788.8 1867.72  36
  -4  -3   2 33038.1 1926.58  13
  -4  -3   2 33755.0 1852.71  11
  -4  -3   2 32650.9 1840.62  10
  -4  -3   2 32360.2 2224.49   2
  -4  -3   2 34062.1 1855.03   3
   4  -3   2 36091.2 1892.26  25
  -4  -3   2 34001.4 1907.55  23
  -4  -3   2 34855.2 1841.65  17
  -4  -3   3 36075.6 2257.38   7
  -4  -3   3 37738.9 1932.93   6
  -4  -3   3 35192.5 1862.28   9
  -4   3   3 33941.5 1861.62  36
  -4  -3   3 33611.9 1852.96  11
  -4  -3   3 32946.5 1952.20  13
  -4  -3   3 32996.5 1840.44  10
  -4  -3   3 34362.6 1852.38   3
  -4  -3   3 34397.6 2208.72   2
  -4  -3   3 33683.4 1826.03   4
   4  -3   3 32106.2 1870.62  25
  -4  -3   3 32862.7 1901.47  23
  -4  -3   3 36801.4 1848.78  17
  -4  -3   4 39669.1 2166.10   4
  -4  -3   4 38266.3 2480.69   2
  -4  -3   4 37723.5 2311.86  13
  -4  -3   4 41045.0 2200.22  11
  -4  -3   4 39384.6 2182.34  10
  -4   3   4 41169.3 2202.01  36
   4  -3   4 48033.0 2755.17  39
   4  -3   4 40973.9 2226.93  25
  -4  -3   4 43425.0 2205.87   9
  -4  -3   4 43659.1 2259.85   6
  -4  -3   4 41949.5 2570.24   7
  -4  -3   4 50058.5 3972.82  15
  -4  -3   4 42195.3 2184.01  17
  -4  -3   5 15908.6 966.529   4
  -4  -3   5 17127.5 1259.33   2
  -4  -3   5 13965.1 1106.92  13
  -4  -3   5 17448.8 2234.98  15
  -4  -3   5 15829.5 988.603  11
  -4   3   5 16459.1 990.290  36
   4  -3   5 17410.4 1443.92  39
   4  -3   5 16470.8 1019.76  25
  -4  -3   5 15329.6 1250.24   7
  -4  -3   5 16945.0 1033.23   6
  -4  -3   5 17850.9 996.784   9
  -4  -3   5 16254.3 970.434  17
  -4  -3   6 28856.9 1663.01   4
  -4  -3   6 26740.8 1841.92  13
   4  -3   6 34655.7 2137.09  39
  -4   3   6 29272.3 1686.24  36
   4  -3   6 31826.8 1735.17  25
  -4  -3   6 32096.2 1736.37   6
  -4  -3   6 29785.6 1976.61   7
  -4  -3   6 32261.8 1692.63   9
  -4  -3   6 31308.4 3021.34  15
  -4  -3   6 31717.3 1682.13  17
  -4  -3   7 28184.0 1657.44   4
  -4  -3   7 28611.7 1892.23  13
   4  -3   7 33421.7 2086.15  39
  -4   3   7 30924.6 1686.99  36
   4  -3   7 31979.0 1737.01  25
  -4  -3   7 31097.3 1967.32   7
  -4  -3   7 29479.6 1667.23   9
  -4  -3   7 32348.8 1728.78   6
  -4  -3   7 35433.0 3027.16  15
  -4  -3   7 29817.1 1667.40  17
   4  -3   8 36055.2 2185.47  39
  -4   3   8 31519.3 1816.48  36
  -4   3   8 28930.6 2732.32  38
  -4  -3   8 29206.8 1981.63  13
  -4  -3   8 32063.8 1798.17  12
  -4  -3   8 32884.1 1815.41   4
  -4  -3   8 36660.8 1874.71   6
  -4  -3   8 36616.6 2117.44   7
  -4  -3   8 34275.7 1821.45   9
  -4  -3   8 33226.5 1817.16  17
  -4   3   9 41601.2 3424.18  38
   4  -3   9 49882.6 2715.61  39
  -4   3   9 44374.1 2373.37  36
  -4  -3   9 39539.8 2507.97  13
  -4  -3   9 44500.4 2351.22  12
  -4  -3   9 40960.3 2354.12   4
  -4  -3   9 45828.1 2368.53   9
  -4  -3   9 47080.0 2406.23   6
  -4  -3   9 45734.4 2617.03   7
  -4  -3   9 44113.0 2361.56  17
  -4   3  10 20190.2 1191.17  36
  -4   3  10 19502.2 2086.41  38
   4  -3  10 22154.0 1501.83  39
  -4  -3  10 18414.9 1300.61  13
  -4  -3  10 19515.5 1160.25  12
  -4  -3  10 17539.1 1161.92   4
  -4  -3  10 19823.8 1174.51   9
  -4  -3  10 20443.5 1383.30   7
  -4  -3  10 21444.2 1216.33   6
  -4  -3  10 20150.4 1178.30  17
  -4   3  11 8417.11 620.213  36
   4  -3  11 9725.06 914.353  39
  -4   3  11 8117.83 1309.39  38
  -4  -3  11 7194.54 602.443   4
  -4  -3  11 8033.09 729.198  13
  -4  -3  11 8059.64 601.876  12
  -4  -3  11 9738.21 682.884  14
  -4  -3  11 9003.21 644.473   6
  -4  -3  11 7768.50 595.489   9
  -4  -3  11 8364.49 771.011   7
  -4  -3  11 7119.70 546.863  18
  -4  -3  11 9077.52 626.368  17
   4   3  12 11474.6 845.047  34
  -4   3  12 12294.0 826.646  36
   4  -3  12 13117.8 1075.76  39
  -4   3  12 11148.2 1570.60  38
  -4  -3  12 12194.5 810.311  12
  -4  -3  12 11842.7 857.261  14
  -4  -3  12 11341.6 757.652  18
  -4  -3  12 12945.1 830.690  17
  -4  -3  12 12852.3 825.229   9
  -4  -3  12 12745.6 835.926   6
  -4  -3  12 11205.1 935.020   7
  -4  -3  13 20759.5 1213.53   9
  -4  -3  13 20006.6 1209.38   6
  -4  -3  13 17635.6 1290.64   7
   4   3  13 20367.1 1236.38  34
  -4   3  13 20279.5 1225.01  36
   4  -3  13 20145.4 1433.91  39
  -4   3  13 19599.2 2131.74  38
  -4  -3  13 20655.8 1202.61  12
  -4  -3  13 18914.8 1247.57  14
   4  -3  13 20295.0 1274.89  24
  -4  -3  13 18689.4 1143.42  18
  -4  -3  13 20005.0 1218.03  17
  -4  -3  14 34590.6 2030.58   7
  -4  -3  14 34534.5 1927.50   6
  -4  -3  14 35108.2 1941.91   9
   4   3  14 33275.1 1933.36  34
  -4   3  14 29948.1 2861.44  38
  -4   3  14 36173.9 1966.53  36
   4  -3  14 31336.1 2108.34  39
  -4  -3  14 33121.7 1911.66  12
  -4  -3  14 36153.8 2008.47  14
   4  -3  14 36404.4 2026.05  24
  -4  -3  14 32713.1 1869.13  18
   4  -3  14 37090.4 2000.53  18
  -4  -3  14 34620.4 1949.56  17
  -4  -3  15 26611.4 1690.07   7
  -4  -3  15 28000.9 1621.50   6
  -4  -3  15 28861.1 1650.86   9
   4   3  15 29684.5 1654.74  34
  -4   3  15 19333.5 2330.70  38
   4  -3  15 25186.4 1775.99  39
  -4  -3  15 31302.0 1709.99  13
  -4  -3  15 29567.5 1641.28  12
  -4  -3  15 27839.1 1700.05  14
   4  -3  15 29726.0 1742.63  24
  -4  -3  15 25938.7 1575.95  18
   4  -3  15 31986.4 1741.47  18
   4  -3  15 24531.3 2608.62  15
  -4  -3  16 37250.7 2046.69   9
  -4   3  16 32919.7 2972.50  38
  -4  -3  16 37578.6 2066.23  13
  -4  -3  16 36203.3 2024.13  12
   4   3  16 35174.6 2014.47  34
   4  -3  16 37477.3 2149.32  24
  -4   3  16 37652.7 2071.83  20
  -4  -3  16 33014.2 1969.19  18
   4  -3  16 39473.4 2139.94  18
  -4   3  17 27853.4 2650.83  38
   4  -3  17 28726.9 1828.99  35
  -4  -3  17 30828.6 1764.00  13
  -4  -3  17 30425.3 1749.88  12
   4   3  17 29104.7 1725.01  34
  -4   3  17 32620.5 1826.33  20
   4  -3  17 32383.7 1899.38  24
  -4  -3  17 29716.3 1711.77  18
   4  -3  17 28509.1 1836.54  18
  -4   3  18 18059.3 1996.40  38
   4  -3  18 18514.4 1285.84  35
  -4  -3  18 18991.8 1182.72  13
  -4  -3  18 17735.6 1181.91  12
  -4  -3  18 18638.0 1262.90  10
   4   3  18 18819.4 1167.93  34
   4  -3  18 18557.4 1318.88  24
  -4  -3  18 18504.5 1158.06  18
   4  -3  18 18485.5 1307.13  18
  -4   3  19 15740.2 1844.59  38
   4  -3  19 17934.7 1248.61  35
  -4  -3  19 19062.3 1133.70  13
  -4  -3  19 17217.1 1208.33  10
  -4  -3  19 17780.2 1156.69  12
   4   3  19 17644.4 1109.93  34
   4  -3  19 19620.1 1329.48  24
  -4  -3  19 16840.3 1109.96  18
   4  -3  19 14800.0 1231.50  18
  -4   3  20 11063.8 863.864  34
   4  -3  20 11283.1 922.673  35
  -4  -3  20 12884.2 841.993  13
  -4  -3  20 12129.4 941.626  10
  -4  -3  20 11827.6 881.346  12
   4   3  20 12621.1 839.149  34
   4  -3  20 12426.9 1043.84  24
  -4  -3  20 11260.0 840.412  18
   4  -3  20 10849.8 998.148  18
   4  -3  21 7637.01 709.333  35
  -4  -3  21 9201.98 646.503  13
  -4  -3  21 7503.91 661.535  12
  -4  -3  21 8116.29 737.997  10
  -4   3  21 6660.86 626.858  34
   4   3  21 8430.95 631.053  34
   4  -3  21 7763.67 829.811  24
  -4  -3  21 7370.72 638.599  18
   4  -3  21 6731.60 747.872  18
   4  -3  22 12362.2 890.777  35
  -4  -3  22 11397.7 840.284  12
  -4  -3  22 11676.6 894.872  10
  -4  -3  22 12033.7 804.999  13
  -4   3  22 11840.7 1022.30  33
  -4   3  22 10760.6 811.025  34
   4   3  22 13342.1 830.241  34
  -4   3  22 11544.1 891.224  19
   4  -3  22 12284.6 1002.38  24
  -4  -3  22 10512.1 810.361  18
   4  -3  22 10636.9 919.463  18
   4  -3  23 10369.4 793.049  35
  -4  -3  23 10878.1 821.996  10
  -4  -3  23 11548.3 742.399  13
  -4  -3  23 9872.77 761.428  12
  -4   3  23 10394.2 909.899  33
  -4   3  23 10003.9 724.654  34
   4   3  23 10373.0 730.898  34
   4  -3  23 10129.6 878.660  24
  -4  -3  23 9094.77 722.872  18
   4  -3  23 10407.3 826.077  18
  -4   3  23 10705.4 798.257  19
   4  -3  24 13468.2 908.796  35
  -4  -3  24 13102.3 878.084  12
  -4  -3  24 14385.9 938.821  10
  -4  -3  24 14489.9 861.289  13
  -4   3  24 13356.7 1024.21  33
  -4   3  24 11603.8 821.902  34
   4   3  24 13256.2 856.699  34
   4  -3  24 14067.7 985.830  24
  -4  -3  24 12348.5 852.037  18
   4  -3  24 11785.8 899.734  18
  -4   3  24 11776.7 876.491  19
   4  -3  25 11033.4 784.176  35
  -4  -3  25 12792.9 761.105  13
  -4  -3  25 12558.9 833.548  10
  -4  -3  25 11414.1 770.884  12
   4   3  25 11165.4 753.277  34
   4  -3  25 11717.3 860.502  24
  -4  -3  25 9880.57 734.176  18
   4  -3  25 10017.4 774.893  18
  -4   3  25 10813.7 773.572  19
   4   3  26 7739.56 577.037  35
   4  -3  26 7646.27 592.598  35
  -4  -3  26 7607.62 551.232  13
  -4  -3  26 8297.79 618.146  10
  -4  -3  26 7895.41 575.327  12
   4   3  26 7971.75 575.707  34
   4  -3  26 8002.05 656.868  24
   4  -3  26 6770.12 569.022  18
  -4   3  26 7213.24 559.595  19
   4   3  27 9640.35 644.844  35
  -4  -3  27 10254.5 683.287  10
  -4  -3  27 10495.0 646.504  12
  -4  -3  27 11040.8 637.897  13
   4   3  27 9082.19 632.208  34
   4  -3  27 8872.90 685.833  24
  -4   3  27 8725.48 609.293  19
  -4  -3  28 9302.17 635.974  10
  -4  -3  28 9198.80 595.797  12
  -4  -3  28 9363.92 587.155  13
   4   3  28 8515.02 604.316  35
   4  -3  28 8384.37 644.849  24
   4   3  28 8783.31 604.205  34
  -4  -3  29 11001.3 691.183  10
   4   3  29 11018.9 683.660  35
   4  -3  29 9596.53 695.679  24
   4   3  29 10823.0 676.713  34
   4   3  30 8378.16 574.476  34
   4   3  30 9127.99 587.005  35
  -4  -3  30 9986.62 599.968  10
   4   3  31 2682.45 243.859  34
  -4  -3  31 2712.80 261.565  10
   4   3  31 2786.70 249.735  35
  -4  -3  32 3113.71 257.237  10
   4   3  32 2984.78 248.886  35
  -4  -3  33 3596.39 262.556  10
  -4  -3  34 3528.27 235.073  10
   4  -4 -31 471.827 78.5448   1
   4  -4 -30 1212.57 139.587   1
   4  -4 -29 2191.46 213.629   1
   4  -4 -28 1515.19 195.622  23
   4  -4 -28 2031.76 220.540   1
   4  -4 -27 3255.94 294.778   1
   4  -4 -27 2303.02 253.555  23
  -4  -4 -27 2937.82 238.911  23
  -4  -4 -27 2001.97 195.231   9
  -4   4 -27 2910.55 274.613  37
   4  -4 -26 5415.77 411.230   1
   4  -4 -26 4154.33 375.755  23
  -4  -4 -26 4035.03 339.308  23
  -4  -4 -26 3821.22 317.827   9
  -4   4 -26 5032.10 400.783  37
  -4   4 -25 2016.26 270.165  37
   4  -4 -25 1796.09 274.526   1
   4  -4 -25 1300.76 230.042  23
  -4  -4 -25 1443.30 212.157  23
  -4   4 -24 2673.41 332.979  37
   4  -4 -24 2488.73 324.898  23
  -4  -4 -24 2310.23 283.907  23
  -4   4 -23 2985.83 379.677  37
   4  -4 -23 2783.59 393.487   1
  -4  -4 -23 2326.38 301.780  23
  -4   4 -22 3456.84 428.492  37
  -4  -4 -22 3349.45 379.011  23
   4  -4 -22 2977.83 446.795   1
   4  -4 -21 5034.47 562.164  27
  -4   4 -21 6397.29 623.017  37
  -4  -4 -21 5521.96 533.346  23
   4  -4 -21 6870.19 667.802   1
   4  -4 -20 1566.66 377.136  27
  -4   4 -20 2277.22 424.073  37
  -4  -4 -20 2781.49 382.000  23
   4  -4 -20 1904.72 454.290   1
  -4  -4 -19 1873.27 376.775  23
   4  -4 -19 1930.35 405.521  27
  -4   4 -19 1911.05 395.401  37
   4  -4 -18 1100.34 341.300  27
  -4   4 -18 1666.22 372.040  37
  -4  -4 -18 1671.50 342.981  23
  -4  -4 -18 1346.09 207.205   6
   4  -4 -17 13273.6 1010.39  27
  -4   4 -17 13923.0 1042.29  37
  -4  -4 -17 14407.6 1060.18  23
  -4  -4 -17 12605.5 849.384   6
   4  -4 -16 11540.4 920.333  27
  -4   4 -16 12698.3 963.032  37
  -4  -4 -16 11597.7 937.748  23
  -4  -4 -16 11572.4 798.829   6
   4  -4 -15 5405.94 603.820  27
  -4   4 -15 6012.68 634.062  37
  -4  -4 -15 5728.23 648.960  23
  -4  -4 -15 6895.00 544.093   6
   4  -4 -14 15471.0 1064.33  27
  -4  -4 -14 14838.6 1079.54  23
  -4  -4 -14 13460.9 955.247   6
  -4   4 -14 14401.7 1053.91  37
  -4  -4 -13 3514.35 415.907   6
  -4  -4 -13 3430.16 468.604   7
  -4   4 -13 3294.31 445.920  37
  -4  -4 -13 3667.66 490.330  23
   4  -4 -13 3893.15 1202.54  15
  -4  -4 -12 3606.04 434.586   6
  -4  -4 -12 4230.32 525.811   7
  -4   4 -12 4557.38 499.192  37
  -4  -4 -12 3665.66 485.807  23
   4  -4 -12 2674.19 1117.45  15
   4  -4 -12 4849.98 1039.02  31
  -4  -4 -11 8595.08 696.782   6
  -4  -4 -11 7805.22 749.643   7
  -4   4 -11 8301.80 684.288  37
   4  -4 -11 6660.77 588.560  23
  -4  -4 -11 7767.49 689.566  23
   4  -4 -11 7162.80 1643.20  15
   4  -4 -10 3743.69 1359.00  15
  -4   4 -10 3566.31 779.007  32
   4  -4 -10 4772.19 491.822   1
   4  -4 -10 5150.79 491.940  26
   4  -4 -10 3825.00 820.710  28
   4  -4 -10 3859.62 400.373  23
  -4  -4 -10 4843.02 510.714  23
  -4  -4 -10 4539.69 510.016   6
  -4  -4 -10 5159.59 588.707   7
   4  -4  -9 12827.4 2160.49  15
  -4   4  -9 10386.3 1300.57  32
   4  -4  -9 9725.23 751.265   1
   4  -4  -9 9512.48 752.043  26
   4  -4  -9 9547.24 1321.54  28
  -4  -4  -9 10385.7 813.091  23
  -4  -4  -9 11341.6 873.783   6
  -4  -4  -9 10963.9 928.652   7
  -4  -4  -8 2907.17 481.445   7
  -4  -4  -8 3318.85 443.731   6
   4  -4  -8 2802.88 373.918   1
   4  -4  -8 2697.46 708.303  39
  -4   4  -8 2094.87 631.150  32
   4  -4  -8 2695.97 356.640  26
   4  -4  -8 2394.81 642.004  28
  -4  -4  -8 2236.04 370.730  23
   4  -4  -8 582.336 982.057  15
  -4  -4  -7 2979.19 489.838   7
  -4  -4  -7 2691.98 412.117   6
   4  -4  -7 2958.69 377.965   1
   4  -4  -7 3897.57 827.412  39
  -4   4  -7 3159.80 727.899  32
  -4  -4  -7 3513.22 1027.35  15
   4  -4  -7 3308.57 736.799  28
   4  -4  -7 3191.02 390.007  26
  -4  -4  -7 2632.83 390.605  23
   4  -4  -7 1829.47 1110.70  15
  -4  -4  -6 4040.14 478.659   6
  -4  -4  -6 4691.07 441.345   9
  -4  -4  -6 3417.42 543.679   7
   4  -4  -6 3290.50 826.817  39
  -4  -4  -6 3709.74 1110.69  15
   4  -4  -6 3395.39 410.858   1
   4  -4  -6 3865.99 428.730  26
   4  -4  -6 3440.90 778.854  28
  -4  -4  -6 4088.30 453.621  23
   4  -4  -6 3835.96 1459.65  15
  -4  -4  -6 3864.22 388.077  17
  -4  -4  -5 10816.2 862.375   6
  -4  -4  -5 12089.7 810.114   9
  -4  -4  -5 10941.5 1026.87   7
   4  -4  -5 13496.7 1346.93  39
  -4  -4  -5 11761.1 1912.96  15
   4  -4  -5 11019.6 781.478   1
   4  -4  -5 11836.1 1415.35  28
   4  -4  -5 10241.5 787.698  26
  -4  -4  -5 11286.1 825.539  23
   4  -4  -5 8718.28 2189.79  15
  -4  -4  -5 10694.7 748.382  17
  -4  -4  -4 10168.8 799.151   6
  -4  -4  -4 10118.3 723.177   9
  -4  -4  -4 10133.1 969.683   7
   4  -4  -4 11441.3 1301.70  39
  -4  -4  -4 11908.5 1906.29  15
   4  -4  -4 9861.70 725.111   1
   4  -4  -4 8884.81 713.584  26
   4  -4  -4 8168.14 1186.30  28
  -4  -4  -4 10580.7 764.310  23
   4  -4  -4 8462.36 2150.38  15
  -4  -4  -4 8867.43 667.319  17
  -4  -4  -3 16092.6 1002.34   9
  -4  -4  -3 17069.7 1106.08   6
  -4  -4  -3 14431.7 1251.33   7
   4  -4  -3 17081.4 1615.84  39
  -4  -4  -3 15337.4 2205.53  15
  -4  -4  -3 13862.7 934.478   4
   4  -4  -3 13974.7 966.856   1
   4  -4  -3 13797.1 1592.31  28
   4  -4  -3 16511.0 1028.82  26
  -4  -4  -3 15119.8 1029.32  23
   4  -4  -3 10386.4 2434.48  15
  -4  -4  -3 15518.8 959.410  17
  -4   4  -2 12616.3 875.328  36
   4  -4  -2 14233.5 1556.68  39
  -4  -4  -2 14776.6 2215.87  15
  -4  -4  -2 12119.0 830.317  10
  -4  -4  -2 13091.3 844.390   4
   4  -4  -2 12329.9 1478.79  28
   4  -4  -2 12832.4 902.274  26
  -4  -4  -2 14408.1 983.788   6
  -4  -4  -2 14490.3 902.268   9
  -4  -4  -2 11724.8 1138.73   7
  -4  -4  -2 13245.3 849.820  17
  -4   4  -1 5454.03 458.256  36
   4  -4  -1 6279.93 1161.35  39
  -4  -4  -1 3471.53 390.428  11
  -4  -4  -1 6188.05 1502.33  15
  -4  -4  -1 3849.82 392.946  10
  -4  -4  -1 3867.50 381.710   4
   4  -4  -1 3740.78 440.122  26
   4  -4  -1 4311.44 895.532  28
  -4  -4  -1 3878.22 631.749   7
  -4  -4  -1 5070.05 443.580   9
  -4  -4  -1 5076.71 505.236   6
  -4  -4  -1 5283.70 422.116  17
  -4   4   0 3562.25 375.937  36
   4  -4   0 4981.52 1171.66  39
  -4  -4   0 3263.43 362.270  11
  -4  -4   0 3152.52 369.148  13
  -4  -4   0 3414.67 366.709  10
  -4  -4   0 4999.67 1639.72  15
  -4  -4   0 3680.18 358.284   4
   4  -4   0 2120.06 689.317  28
  -4  -4   0 3989.68 647.410   7
  -4  -4   0 3141.18 422.123   6
  -4  -4   0 3957.81 359.334  17
  -4  -4   1 6064.22 491.444  10
  -4  -4   1 5527.25 483.185  11
  -4  -4   1 5745.70 517.482  13
  -4  -4   1 5544.33 474.700   4
   4  -4   1 7009.87 562.131  25
  -4   4   1 5977.05 502.948  36
  -4  -4   1 6415.27 496.047  17
  -4  -4   2 10347.4 742.845  10
  -4  -4   2 11213.2 759.879  11
  -4  -4   2 11266.5 821.105  13
  -4  -4   2 11924.5 767.696   4
   4  -4   2 11719.9 821.408  25
   4  -4   2 14391.3 1597.52  28
  -4   4   2 11258.4 779.153  36
  -4  -4   2 11297.5 763.305  17
  -4  -4   3 13711.0 877.257  10
  -4  -4   3 12204.3 943.128  13
  -4  -4   3 13954.3 886.799  11
  -4  -4   3 13222.6 872.029   4
   4  -4   3 13791.3 1637.28  28
   4  -4   3 14058.0 943.698  25
  -4   4   3 14226.2 904.155  36
  -4  -4   3 14206.1 893.754  17
  -4   4   4 9293.95 653.622  36
  -4  -4   4 7979.14 705.327  13
  -4  -4   4 9266.57 642.532  10
  -4  -4   4 7972.46 620.092  11
  -4  -4   4 6764.93 1515.63  15
  -4  -4   4 8681.32 631.690   4
   4  -4   4 9319.95 701.228  25
   4  -4   4 6287.57 1146.78  28
  -4  -4   4 9538.45 668.584   9
  -4  -4   4 8523.82 703.599   6
  -4  -4   4 8192.79 858.892   7
   4  -4   4 8785.94 2246.50  15
  -4  -4   4 8275.77 628.430  17
  -4   4   5 12481.1 819.052  36
   4  -4   5 13001.4 1374.57  39
  -4  -4   5 9138.91 857.414  13
  -4  -4   5 10616.3 776.301  11
  -4  -4   5 11976.5 796.648  10
  -4  -4   5 11224.5 1846.37  15
  -4  -4   5 11387.7 793.264   4
   4  -4   5 11922.9 854.770  25
   4  -4   5 11925.3 1554.40  28
  -4  -4   5 12682.9 822.355   9
  -4  -4   5 12774.9 1082.92   7
  -4  -4   5 13363.2 900.829   6
   4  -4   5 11794.4 2436.35  15
  -4  -4   5 12545.7 811.617  17
  -4   4   6 5170.25 455.192  36
   4  -4   6 4782.39 937.273  39
  -4  -4   6 4863.17 437.901  11
  -4  -4   6 4628.06 435.505  10
  -4  -4   6 4552.32 554.882  13
  -4  -4   6 4984.12 1223.16  15
  -4  -4   6 4359.92 428.090   4
   4  -4   6 6115.87 1089.26  28
   4  -4   6 4582.86 486.165  25
   4  -4   6 3616.60 1634.42  15
  -4  -4   6 4935.62 440.643  17
  -4  -4   6 4270.43 429.156   9
  -4  -4   6 4500.90 475.584   6
  -4  -4   6 5137.52 639.745   7
  -4  -4   7 1913.53 305.864   6
  -4  -4   7 1850.76 265.366   9
  -4  -4   7 2029.90 286.278  10
  -4  -4   7 2423.64 449.858   7
  -4   4   7 1416.28 263.006  36
   4  -4   7 2302.50 809.203  39
  -4  -4   7 1417.67 360.207  13
  -4  -4   7 1905.95 267.349  11
  -4  -4   7 1434.97 820.245  15
  -4  -4   7 1560.74 263.741   4
   4  -4   7 2808.38 785.761  28
   4  -4   7 1784.73 311.410  25
   4  -4   7 1555.27 1204.10  15
  -4  -4   7 1299.70 242.652  17
  -4  -4   8 2313.69 424.433   7
  -4  -4   8 2519.32 327.079   9
  -4  -4   8 2477.48 366.912   6
  -4  -4   8 2618.79 330.004  10
  -4   4   8 2714.69 345.314  36
   4  -4   8 1743.67 666.004  39
  -4  -4   8 2675.89 324.511  11
  -4  -4   8 2327.44 867.087  15
  -4  -4   8 2425.58 426.983  13
  -4  -4   8 2929.82 332.987   4
   4  -4   8 2830.56 386.939  25
   4  -4   8 1178.10 1212.80  15
  -4  -4   8 2409.64 322.796  17
  -4  -4   9 6402.16 569.691   4
  -4  -4   9 5362.16 632.390  13
  -4  -4   9 6912.20 563.098  11
  -4  -4   9 7338.28 586.696  10
  -4   4   9 7678.17 598.482  36
  -4   4   9 5913.96 1239.39  38
   4  -4   9 7856.71 1030.54  39
   4  -4   9 8158.95 671.100  25
  -4  -4   9 8059.52 610.465   9
  -4  -4   9 7906.94 740.647   7
  -4  -4   9 8470.53 660.152   6
  -4  -4   9 7238.20 591.842  17
   4  -4   9 5860.57 1632.23  15
  -4  -4  10 7203.31 638.117   4
  -4  -4  10 8495.27 742.035  13
  -4  -4  10 7945.97 632.459  11
  -4  -4  10 8112.93 647.190  10
  -4   4  10 8426.50 654.600  36
  -4   4  10 8012.52 1371.36  38
   4  -4  10 9145.85 738.044  25
  -4  -4  10 9717.79 693.964   9
  -4  -4  10 10722.3 748.436   6
  -4  -4  10 8658.80 793.235   7
  -4  -4  10 8573.24 662.014  17
   4  -4  10 8467.44 1853.37  15
  -4  -4  11 4693.94 474.136   4
  -4   4  11 5796.74 507.790  36
  -4   4  11 4646.63 1069.66  38
   4  -4  11 6106.03 586.375  25
  -4  -4  11 4383.90 528.089  13
  -4  -4  11 4969.58 456.505  11
  -4  -4  11 4396.95 472.505  10
  -4  -4  11 5244.14 512.856  14
  -4  -4  11 5159.39 487.993   9
  -4  -4  11 5560.71 526.977   6
  -4  -4  11 4754.79 560.602   7
  -4  -4  11 5523.60 498.407  17
   4  -4  11 5533.69 1477.84  15
  -4   4  12 3856.13 435.145  36
  -4   4  12 4400.55 979.820  38
   4  -4  12 3711.90 480.751  25
  -4  -4  12 4557.53 499.092  13
  -4  -4  12 3615.64 394.241  11
  -4  -4  12 4162.51 444.477  10
  -4  -4  12 3900.46 488.274   7
  -4  -4  12 4062.65 435.883   9
  -4  -4  12 5583.83 512.883   6
  -4  -4  12 4021.73 429.214  17
   4  -4  12 2148.21 1023.60  15
  -4   4  13 6964.29 1273.40  38
  -4   4  13 7694.43 618.195  36
  -4  -4  13 7175.72 624.687  13
  -4  -4  13 7060.51 563.408  11
  -4  -4  13 5875.40 573.146  10
   4  -4  13 6256.77 640.894  25
  -4  -4  13 6445.44 591.374   6
  -4  -4  13 6444.99 579.854   9
  -4  -4  13 6247.60 636.970   7
  -4  -4  13 6677.96 583.171  17
   4  -4  13 4288.71 1235.81  15
  -4   4  14 7182.96 1302.32  38
  -4   4  14 11026.2 906.669  33
  -4  -4  14 10268.1 778.702  13
  -4  -4  14 9637.48 725.079  11
  -4  -4  14 10565.1 777.392  10
   4  -4  14 10839.3 873.029  25
  -4  -4  14 10482.1 780.081   9
   4  -4  14 8478.12 1555.31  15
  -4  -4  14 9922.80 758.626  17
  -4   4  15 5910.07 1155.55  38
  -4   4  15 6687.50 737.829  33
   4   4  15 6930.81 577.755  34
  -4  -4  15 6947.38 609.399  10
  -4  -4  15 6550.54 560.847  11
   4  -4  15 7621.46 713.842  25
  -4  -4  15 7177.62 608.836   9
   4  -4  15 4728.50 1247.72  15
  -4  -4  15 6768.06 599.727  17
  -4   4  16 9569.80 864.296  33
   4   4  16 9023.11 679.496  34
  -4  -4  16 8792.35 679.856  11
  -4  -4  16 9295.56 732.771  10
   4  -4  16 9769.82 819.523  25
  -4   4  16 9497.37 1403.83  38
  -4  -4  16 8271.33 707.491  17
   4  -4  17 10484.4 895.451  25
  -4  -4  17 9376.21 736.131  11
  -4  -4  17 10830.8 809.570  10
  -4  -4  17 10359.4 800.787  17
  -4   4  17 12487.9 999.067  33
   4   4  17 10587.9 749.080  34
  -4   4  18 2943.33 517.924  33
   4   4  18 3348.81 365.210  34
  -4  -4  18 2638.58 349.963  11
  -4  -4  18 3016.24 370.695  13
   4  -4  18 3248.89 485.061  25
  -4  -4  18 2445.33 363.127  17
  -4  -4  18 3266.28 431.919  10
   4   4  19 1306.85 254.609  34
  -4   4  19 874.456 382.529  33
  -4  -4  19 1292.56 302.483  14
  -4  -4  19 1775.38 281.638  13
   4  -4  19 1243.50 338.597  25
  -4  -4  19 973.594 245.211  17
  -4  -4  19 1333.26 312.190  10
  -4   4  20 1879.82 345.794  34
   4   4  20 2758.10 315.195  34
  -4   4  20 2502.63 460.691  33
  -4  -4  20 2575.48 322.342  13
  -4  -4  20 1927.21 334.436  14
   4  -4  20 2594.48 432.493  25
  -4  -4  20 2760.79 362.163  17
  -4   4  20 2032.54 326.438  19
  -4  -4  20 2892.42 403.163  10
  -4   4  21 5058.18 507.967  34
  -4   4  21 5656.75 644.493  33
   4   4  21 5352.00 453.573  34
  -4  -4  21 6740.18 503.816  13
  -4  -4  21 6089.09 554.259  10
   4  -4  21 5854.88 583.778  25
  -4   4  21 5020.39 479.435  19
  -4  -4  21 4932.29 500.544  17
   4  -4  22 4634.08 502.720  25
  -4  -4  22 5197.75 422.372  13
  -4  -4  22 4028.17 458.012  10
  -4  -4  22 3924.17 424.571  17
  -4   4  22 4760.89 554.665  33
  -4   4  22 4020.41 417.910  34
   4   4  22 4630.32 400.307  34
   4  -4  23 1355.22 282.693  25
  -4  -4  23 1293.52 217.881  13
   4  -4  23 849.119 219.555  13
  -4  -4  23 1066.63 207.483  17
  -4   4  23 1105.36 215.001  34
   4   4  23 1508.56 221.342  34
  -4   4  23 1127.73 298.712  33
   4   4  24 2912.89 290.749  34
  -4  -4  24 3904.68 330.765  13
   4  -4  24 2089.16 265.602  13
   4  -4  24 3707.88 389.526  25
   4   4  24 3056.01 296.067  35
  -4  -4  24 2682.03 296.928  17
   4   4  25 1315.09 196.444  34
   4   4  25 1679.85 213.158  35
  -4  -4  25 1585.47 219.471  13
   4   4  26 2581.92 249.527  34
  -4  -4  26 2844.39 273.057  13
   4   4  26 2611.40 253.250  35
  -4  -4  27 3864.76 310.283  13
  -4  -4  28 2043.54 198.255  13
   4  -5 -24 126.820 104.073   1
   4  -5 -23 808.231 168.726   1
  -4  -5 -23 562.850 130.590  23
  -4  -5 -22 330.019 81.0699   9
   4  -5 -22 372.553 162.796   1
  -4  -5 -22 440.476 134.022  23
  -4  -5 -21 800.650 129.818   9
   4  -5 -21 1033.27 225.234   1
  -4  -5 -21 1236.35 202.472  23
  -4  -5 -20-29.3203 86.0916   9
  -4  -5 -20 230.727 176.804  23
   4  -5 -20-51.2163 183.350   1
   4  -5 -19 760.107 254.635  27
  -4  -5 -19 905.312 166.282   9
  -4  -5 -19 1056.55 232.302  23
   4  -5 -19 887.432 263.885   1
   4  -5 -18 251.206 248.267  27
  -4  -5 -18 405.297 147.829   9
  -4  -5 -18 358.530 204.986  23
   4  -5 -18 879.188 298.122   1
   4  -5 -17 263.102 267.861  27
  -4  -5 -17 463.119 155.356   9
  -4  -5 -17 833.714 246.511  23
   4  -5 -17 610.569 271.241   1
   4  -5 -16 700.635 323.817  27
  -4  -5 -16 468.099 143.524   6
  -4  -5 -16 287.470 148.327   9
  -4  -5 -16 371.915 244.259  23
   4  -5 -16 270.551 249.372   1
   4  -5 -15 1236.23 354.716  27
  -4  -5 -15 1313.98 261.807   9
  -4  -5 -15 1641.10 229.830   6
  -4  -5 -15 2252.76 365.369  23
   4  -5 -15 1541.00 325.852   1
   4  -5 -14 627.655 252.979   1
   4  -5 -14 918.297 351.705  16
   4  -5 -14 728.152 321.927  27
  -4  -5 -14 1853.19 341.898  23
  -4  -5 -14 1023.41 254.827   9
  -4  -5 -14 1593.07 235.925   6
   4  -5 -13 552.371 246.157   1
   4  -5 -13-43.3947 336.003  16
   4  -5 -13 738.651 278.345  27
  -4  -5 -13 425.024 254.120  23
  -4  -5 -13 456.892 190.537   9
  -4  -5 -13 573.826 179.646   6
   4  -5 -12 700.562 245.123   1
   4  -5 -12 98.4700 371.974  16
   4  -5 -12 329.855 268.044  27
  -4  -5 -12 653.476 268.622  23
  -4  -5 -12 430.472 190.556   9
  -4  -5 -12 489.789 183.876   6
  -4  -5 -11 3170.63 389.573   9
  -4  -5 -11 2879.54 360.173   6
   4  -5 -11 2525.83 371.815   1
  -4   5 -11 2463.67 348.041  36
   4  -5 -11 3154.65 462.952  27
  -4  -5 -11 2473.73 404.901  23
   4  -5 -11 1834.09 518.687  16
  -4   5 -10 1389.32 285.034  36
  -4  -5 -10 1226.92 242.117   4
   4  -5 -10 1432.86 300.782   1
   4  -5 -10 2093.36 392.745  27
  -4  -5 -10 1958.59 354.828  23
  -4  -5 -10 1672.88 282.229   9
  -4  -5 -10 1558.95 295.355   6
  -4   5  -9 538.192 223.621  36
  -4  -5  -9 717.587 189.045   4
  -4  -5  -9 296.888 225.627  23
  -4  -5  -9 732.957 212.911   9
  -4  -5  -9 529.132 226.802   6
  -4  -5  -8 900.101 208.177   4
   4  -5  -8 988.252 596.813  31
  -4   5  -8 857.520 234.854  36
   4  -5  -8 1647.87 562.087  28
  -4  -5  -8 825.334 249.999   6
  -4  -5  -8 1193.11 252.211   9
   4  -5  -8 801.591 966.332  15
  -4  -5  -7 2562.07 317.110   4
   4  -5  -7 2735.80 772.857  31
  -4   5  -7 3041.76 367.670  36
   4  -5  -7 2710.71 379.546  26
   4  -5  -7 3007.42 766.165  28
  -4  -5  -7 2818.33 432.966   6
  -4  -5  -7 2694.26 348.738   9
   4  -5  -7 3679.03 1372.66  15
  -4   5  -6-86.8046 165.305  36
   4  -5  -6 139.950 205.497  26
   4  -5  -6 151.219 357.625  28
  -4  -5  -6 105.399 148.379   4
  -4  -5  -6-45.6550 197.152   6
  -4  -5  -6 260.530 198.882   9
   4  -5  -6 597.946 865.922  15
  -4   5  -5 85.8361 163.427  36
   4  -5  -5 35.1437 197.844  26
   4  -5  -5-304.572 388.986  28
  -4  -5  -5 26.2938 148.026   4
  -4  -5  -5 64.5275 149.391   9
  -4  -5  -5 273.552 252.858   6
  -4   5  -4-56.6931 187.775  36
  -4  -5  -4 157.640 152.386   4
   4  -5  -4 176.840 199.249  26
   4  -5  -4 307.311 392.557  28
  -4  -5  -4 223.825 180.165   9
[truncated: 259,305 more chars]
