# Supplementary material for: Halogen Bonding in Sulphonamide Co-Crystals: X···π Preferred over X···O/N?
Source: Molecules. 2023 Aug 6;28(15):5910. doi: 10.3390/molecules28155910 (PMC10420850; doi:10.3390/molecules28155910)
Supplement: Supplementary file 1 [file molecules-28-05910-s001.zip › 2-AK_PM1_1zu1_final.cif]

data_th_pm1_mo_autored
_audit_creation_date               2021-11-26
_audit_creation_method
;
Olex2 1.3
(compiled 2020.11.12 svn.r5f609507 for OlexSys, GUI svn.r6408)
;
_shelx_SHELXL_version_number       '2017/1'
_audit_contact_author_address      ?
_audit_contact_author_email        ?
_audit_contact_author_name         ''
_audit_contact_author_phone        ?
_publ_contact_author_id_orcid      ?
_publ_section_references
;
Dolomanov, O.V., Bourhis, L.J., Gildea, R.J, Howard, J.A.K. & Puschmann, H.
 (2009), J. Appl. Cryst. 42, 339-341.

Sheldrick, G.M. (2008). Acta Cryst. A64, 112-122.

Sheldrick, G.M. (2015). Acta Cryst. A71, 3-8.
;
_chemical_name_common              ?
_chemical_name_systematic          ?
_chemical_formula_moiety           'C6 F4 I2, C7 H9 N O2 S'
_chemical_formula_sum              'C13 H9 F4 I2 N O2 S'
_chemical_formula_weight           573.07
_chemical_melting_point            ?
_chemical_oxdiff_formula           C13H8SNO2I2F4
loop_
  _atom_type_symbol
  _atom_type_description
  _atom_type_scat_dispersion_real
  _atom_type_scat_dispersion_imag
  _atom_type_scat_source
 'C' 'C' 0.0033 0.0016 'International Tables Vol C Tables 4.2.6.8 and 6.1.1.4'
 'H' 'H' 0.0000 0.0000 'International Tables Vol C Tables 4.2.6.8 and 6.1.1.4'
 'F' 'F' 0.0171 0.0103 'International Tables Vol C Tables 4.2.6.8 and 6.1.1.4'
 'I' 'I' -0.4742 1.8119 'International Tables Vol C Tables 4.2.6.8 and 6.1.1.4'
 'N' 'N' 0.0061 0.0033 'International Tables Vol C Tables 4.2.6.8 and 6.1.1.4'
 'O' 'O' 0.0106 0.0060 'International Tables Vol C Tables 4.2.6.8 and 6.1.1.4'
 'S' 'S' 0.1246 0.1234 'International Tables Vol C Tables 4.2.6.8 and 6.1.1.4'

_shelx_space_group_comment
;
The symmetry employed for this shelxl refinement is uniquely defined
by the following loop, which should always be used as a source of
symmetry information in preference to the above space-group names.
They are only intended as comments.
;
_space_group_crystal_system        'monoclinic'
_space_group_IT_number             14
_space_group_name_H-M_alt          'P 1 21/n 1'
_space_group_name_Hall             '-P 2yn'
loop_
  _space_group_symop_operation_xyz
 'x, y, z'
 '-x+1/2, y+1/2, -z+1/2'
 '-x, -y, -z'
 'x-1/2, -y-1/2, z-1/2'

_cell_length_a                     5.6059(2)
_cell_length_b                     16.1462(4)
_cell_length_c                     18.2847(4)
_cell_angle_alpha                  90
_cell_angle_beta                   93.083(2)
_cell_angle_gamma                  90
_cell_volume                       1652.63(8)
_cell_formula_units_Z              4
_cell_measurement_reflns_used      10564
_cell_measurement_temperature      100.00(10)
_cell_measurement_theta_max        29.8410
_cell_measurement_theta_min        2.2340
_shelx_estimated_absorpt_T_max     0.857
_shelx_estimated_absorpt_T_min     0.587
_exptl_absorpt_coefficient_mu      3.979
_exptl_absorpt_correction_T_max    1.000
_exptl_absorpt_correction_T_min    0.531
_exptl_absorpt_correction_type     gaussian
_exptl_absorpt_process_details
;
CrysAlisPro 1.171.41.120a (Rigaku Oxford Diffraction, 2021)
Numerical absorption correction based on gaussian integration over
a multifaceted crystal model
Empirical absorption correction using spherical harmonics,
implemented in SCALE3 ABSPACK scaling algorithm.
;
_exptl_absorpt_special_details     ?
_exptl_crystal_colour              'clear colourless'
_exptl_crystal_colour_lustre       clear
_exptl_crystal_colour_primary      colourless
_exptl_crystal_density_diffrn      2.303
_exptl_crystal_density_meas        ?
_exptl_crystal_density_method      ?
_exptl_crystal_description         plate
_exptl_crystal_F_000               1072
loop_
  _exptl_crystal_face_index_h
  _exptl_crystal_face_index_k
  _exptl_crystal_face_index_l
  _exptl_crystal_face_perp_dist
 0 1 -1 0.0502
 -1 -2 -1 0.0375
 1 2 1 0.0584
 0 -1 1 0.0059
 0 2 1 0.0285
 0 -2 -1 0.0109
 1 2 -2 0.0664
 -2 2 -1 0.0611

_exptl_crystal_size_max            0.15
_exptl_crystal_size_mid            0.08
_exptl_crystal_size_min            0.04
loop_
  _exptl_oxdiff_crystal_face_indexfrac_h
  _exptl_oxdiff_crystal_face_indexfrac_k
  _exptl_oxdiff_crystal_face_indexfrac_l
  _exptl_oxdiff_crystal_face_x
  _exptl_oxdiff_crystal_face_y
  _exptl_oxdiff_crystal_face_z
 -0.0000 1.0000 -1.0000 0.0024 0.0134 -0.0570
 -1.0000 -2.0000 -1.0000 0.0279 0.1414 0.0711
 1.0000 2.0000 1.0000 -0.0279 -0.1414 -0.0711
 0.0000 -1.0000 1.0000 -0.0024 -0.0134 0.0570
 0.0000 2.0000 1.0000 0.0612 -0.0535 -0.0513
 -0.0000 -2.0000 -1.0000 -0.0612 0.0535 0.0513
 1.0000 2.0000 -2.0000 -0.0843 -0.0611 -0.1339
 -2.0000 2.0000 -1.0000 0.2017 0.1757 -0.0536

_exptl_transmission_factor_max     ?
_exptl_transmission_factor_min     ?
_diffrn_reflns_av_R_equivalents    0.0314
_diffrn_reflns_av_unetI/netI       0.0259
_diffrn_reflns_Laue_measured_fraction_full  0.997
_diffrn_reflns_Laue_measured_fraction_max  0.822
_diffrn_reflns_limit_h_max         7
_diffrn_reflns_limit_h_min         -7
_diffrn_reflns_limit_k_max         20
_diffrn_reflns_limit_k_min         -19
_diffrn_reflns_limit_l_max         25
_diffrn_reflns_limit_l_min         -25
_diffrn_reflns_number              15672
_diffrn_reflns_point_group_measured_fraction_full  0.997
_diffrn_reflns_point_group_measured_fraction_max  0.822
_diffrn_reflns_theta_full          25.242
_diffrn_reflns_theta_max           29.972
_diffrn_reflns_theta_min           2.231
_diffrn_ambient_environment        N~2~
_diffrn_ambient_temperature        100.00(10)
_diffrn_detector                   'Hybrid Pixel Array Detector'
_diffrn_detector_area_resol_mean   10.0000
_diffrn_detector_type              HyPix
_diffrn_measured_fraction_theta_full  0.997
_diffrn_measured_fraction_theta_max  0.822
_diffrn_measurement_details
;
List of Runs (angles in degrees, time in seconds):

  # Type    Start    End  Width  t~exp~   \w     \q     \k     \f   Frames
--------------------------------------------------------------------------
  1  \w    -69.00 -10.00   0.50    7.48    --    1.50 -46.00-106.00  118
  2  \w     -8.00  42.00   0.50    7.48    --    1.50  46.00  42.00  100
  3  \w    -23.00  33.00   0.50    7.48    --    1.50 -99.00  30.00  112
  4  \w      1.00  30.00   0.50    7.48    --    1.50 -99.00-180.00   58
  5  \w    -22.00   3.00   0.50    7.48    --    1.50 -99.00 -60.00   50
  6  \w    -17.00  30.00   0.50    7.48    --    1.50 -99.00 -90.00   94
;
_diffrn_measurement_device         'four-circle diffractometer'
_diffrn_measurement_device_type    'XtaLAB Synergy, Dualflex, HyPix'
_diffrn_measurement_method         '\w scans'
_diffrn_orient_matrix_type        
 'CrysAlisPro convention (1999,Acta A55,543-557)'
_diffrn_orient_matrix_UB_11        -0.0890745000
_diffrn_orient_matrix_UB_12        0.0211962000
_diffrn_orient_matrix_UB_13        0.0187987000
_diffrn_orient_matrix_UB_21        -0.0878696000
_diffrn_orient_matrix_UB_22        -0.0133787000
_diffrn_orient_matrix_UB_23        -0.0267664000
_diffrn_orient_matrix_UB_31        -0.0197894000
_diffrn_orient_matrix_UB_32        -0.0361036000
_diffrn_orient_matrix_UB_33        0.0209430000
_diffrn_radiation_monochromator    mirror
_diffrn_radiation_probe            x-ray
_diffrn_radiation_type             'Mo K\a'
_diffrn_radiation_wavelength       0.71073
_diffrn_source                     'micro-focus sealed X-ray tube'
_diffrn_source_type                'PhotonJet (Mo) X-ray Source'
_reflns_Friedel_coverage           0.000
_reflns_Friedel_fraction_full      .
_reflns_Friedel_fraction_max       .
_reflns_number_gt                  3519
_reflns_number_total               3945
_reflns_odcompleteness_completeness  99.74
_reflns_odcompleteness_iscentric   1
_reflns_odcompleteness_theta       25.07
_reflns_special_details
;
 Reflections were merged by SHELXL according to the crystal
 class for the calculation of statistics and refinement.
 
 _reflns_Friedel_fraction is defined as the number of unique
 Friedel pairs measured divided by the number that would be
 possible theoretically, ignoring centric projections and
 systematic absences.
;
_reflns_threshold_expression       'I > 2\s(I)'
_computing_cell_refinement         'CrysAlisPro 1.171.41.120a (Rigaku OD, 2021)'
_computing_data_collection         'CrysAlisPro 1.171.41.120a (Rigaku OD, 2021)'
_computing_data_reduction          'CrysAlisPro 1.171.41.120a (Rigaku OD, 2021)'
_computing_molecular_graphics      'Olex2 1.3 (Dolomanov et al., 2009)'
_computing_publication_material    'Olex2 1.3 (Dolomanov et al., 2009)'
_computing_structure_refinement    'XL  (Sheldrick, 2008)'
_computing_structure_solution      'SHELXT  (Sheldrick, 2015)'
_refine_diff_density_max           0.717
_refine_diff_density_min           -0.597
_refine_diff_density_rms           0.109
_refine_ls_extinction_coef         .
_refine_ls_extinction_method       none
_refine_ls_goodness_of_fit_ref     1.036
_refine_ls_hydrogen_treatment      refall
_refine_ls_matrix_type             full
_refine_ls_number_parameters       244
_refine_ls_number_reflns           3945
_refine_ls_number_restraints       0
_refine_ls_R_factor_all            0.0273
_refine_ls_R_factor_gt             0.0225
_refine_ls_restrained_S_all        1.036
_refine_ls_shift/su_max            0.004
_refine_ls_shift/su_mean           0.000
_refine_ls_structure_factor_coef   Fsqd
_refine_ls_weighting_details      
 'w=1/[\s^2^(Fo^2^)+(0.0251P)^2^+1.8250P] where P=(Fo^2^+2Fc^2^)/3'
_refine_ls_weighting_scheme        calc
_refine_ls_wR_factor_gt            0.0524
_refine_ls_wR_factor_ref           0.0545
_refine_special_details            ?
_olex2_refinement_description
;
;
_atom_sites_solution_hydrogens     difmap
_atom_sites_solution_primary       dual
_atom_sites_solution_secondary     ?
loop_
  _atom_site_label
  _atom_site_type_symbol
  _atom_site_fract_x
  _atom_site_fract_y
  _atom_site_fract_z
  _atom_site_U_iso_or_equiv
  _atom_site_adp_type
  _atom_site_occupancy
  _atom_site_site_symmetry_order
  _atom_site_calc_flag
  _atom_site_refinement_flags_posn
  _atom_site_refinement_flags_adp
  _atom_site_refinement_flags_occupancy
  _atom_site_disorder_assembly
  _atom_site_disorder_group
 I1 I 0.54461(3) 0.70489(2) 1.00473(2) 0.02078(6) Uani 1 1 d . . . . .
 I2 I 1.31790(3) 1.01439(2) 1.13727(2) 0.02263(6) Uani 1 1 d . . . . .
 S1 S 0.18645(12) 0.55147(4) 0.89719(3) 0.01967(14) Uani 1 1 d . . . . .
 F4 F 0.5938(3) 0.80067(11) 1.15695(9) 0.0269(4) Uani 1 1 d . . . . .
 F1 F 0.9763(3) 0.79917(10) 0.93283(8) 0.0257(4) Uani 1 1 d . . . . .
 F2 F 1.2706(3) 0.91888(11) 0.98280(9) 0.0289(4) Uani 1 1 d . . . . .
 F3 F 0.8976(3) 0.91615(11) 1.20863(8) 0.0271(4) Uani 1 1 d . . . . .
 O1 O 0.1591(4) 0.58008(13) 0.97117(10) 0.0267(5) Uani 1 1 d . . . . .
 O2 O 0.4197(4) 0.55610(14) 0.86918(11) 0.0269(4) Uani 1 1 d . . . . .
 N1 N 0.0953(5) 0.45613(15) 0.89644(12) 0.0212(5) Uani 1 1 d . . . . .
 C8 C 0.7770(5) 0.79691(16) 1.04334(14) 0.0173(5) Uani 1 1 d . . . . .
 C13 C 0.7610(5) 0.82861(17) 1.11336(14) 0.0189(5) Uani 1 1 d . . . . .
 C12 C 0.9172(5) 0.88930(17) 1.13982(14) 0.0185(5) Uani 1 1 d . . . . .
 C11 C 1.0908(5) 0.92157(17) 1.09721(14) 0.0194(5) Uani 1 1 d . . . . .
 C10 C 1.1047(5) 0.88993(18) 1.02706(14) 0.0207(5) Uani 1 1 d . . . . .
 C9 C 0.9533(5) 0.82816(17) 1.00109(13) 0.0186(5) Uani 1 1 d . . . . .
 C2 C 0.0787(5) 0.40382(16) 0.83370(13) 0.0179(5) Uani 1 1 d . . . . .
 C3 C 0.2488(5) 0.40468(17) 0.78117(15) 0.0212(5) Uani 1 1 d . . . . .
 C5 C 0.0337(6) 0.29605(19) 0.71459(15) 0.0256(6) Uani 1 1 d . . . . .
 C4 C 0.2225(5) 0.35143(19) 0.72139(15) 0.0236(6) Uani 1 1 d . . . . .
 C1 C -0.0111(6) 0.6072(2) 0.83773(16) 0.0254(6) Uani 1 1 d . . . . .
 C6 C -0.1325(6) 0.29478(19) 0.76805(16) 0.0264(6) Uani 1 1 d . . . . .
 C7 C -0.1127(5) 0.34912(19) 0.82686(15) 0.0231(6) Uani 1 1 d . . . . .
 H1A H -0.150(6) 0.601(2) 0.8547(18) 0.019(8) Uiso 1 1 d . . . . .
 H1B H 0.048(6) 0.662(2) 0.8355(17) 0.021(8) Uiso 1 1 d . . . . .
 H4 H 0.331(6) 0.355(2) 0.6898(19) 0.025(9) Uiso 1 1 d . . . . .
 H1C H -0.003(7) 0.583(2) 0.790(2) 0.037(10) Uiso 1 1 d . . . . .
 H3 H 0.369(6) 0.442(2) 0.7855(18) 0.026(9) Uiso 1 1 d . . . . .
 H6 H -0.269(7) 0.259(2) 0.7655(19) 0.031(9) Uiso 1 1 d . . . . .
 H7 H -0.220(7) 0.349(3) 0.860(2) 0.042(11) Uiso 1 1 d . . . . .
 H5 H 0.024(7) 0.260(2) 0.675(2) 0.035(10) Uiso 1 1 d . . . . .
 H1 H 0.012(7) 0.447(2) 0.928(2) 0.032(10) Uiso 1 1 d . . . . .

loop_
  _atom_site_aniso_label
  _atom_site_aniso_U_11
  _atom_site_aniso_U_22
  _atom_site_aniso_U_33
  _atom_site_aniso_U_23
  _atom_site_aniso_U_13
  _atom_site_aniso_U_12
 I1 0.02280(10) 0.02277(10) 0.01676(9) -0.00091(6) 0.00086(7) -0.00186(6)
 I2 0.02153(10) 0.02556(11) 0.02088(10) -0.00069(6) 0.00190(7) -0.00386(7)
 S1 0.0211(3) 0.0265(4) 0.0119(3) -0.0020(2) 0.0048(2) -0.0054(3)
 F4 0.0277(9) 0.0347(10) 0.0195(8) -0.0023(7) 0.0125(7) -0.0091(7)
 F1 0.0323(10) 0.0329(9) 0.0123(7) -0.0051(6) 0.0069(7) -0.0021(7)
 F2 0.0296(9) 0.0364(10) 0.0223(8) -0.0011(7) 0.0145(7) -0.0111(7)
 F3 0.0328(10) 0.0348(10) 0.0145(7) -0.0072(6) 0.0094(7) -0.0065(7)
 O1 0.0340(12) 0.0333(12) 0.0135(9) -0.0045(8) 0.0074(8) -0.0118(9)
 O2 0.0203(10) 0.0394(12) 0.0217(10) -0.0046(8) 0.0076(8) -0.0094(9)
 N1 0.0281(13) 0.0237(12) 0.0129(10) -0.0002(8) 0.0093(10) -0.0028(10)
 C8 0.0185(13) 0.0183(13) 0.0154(12) 0.0000(9) 0.0018(10) 0.0008(10)
 C13 0.0204(13) 0.0226(14) 0.0143(11) 0.0003(10) 0.0077(10) -0.0011(10)
 C12 0.0198(13) 0.0224(13) 0.0135(11) -0.0019(9) 0.0041(10) 0.0001(10)
 C11 0.0201(13) 0.0228(13) 0.0154(12) 0.0000(10) 0.0014(10) 0.0014(10)
 C10 0.0213(13) 0.0271(15) 0.0144(12) 0.0026(10) 0.0070(10) 0.0001(11)
 C9 0.0220(13) 0.0230(14) 0.0112(11) -0.0017(9) 0.0032(10) 0.0024(10)
 C2 0.0218(13) 0.0197(13) 0.0122(11) 0.0013(9) 0.0033(10) 0.0019(10)
 C3 0.0230(14) 0.0210(14) 0.0201(13) 0.0013(10) 0.0053(11) 0.0013(11)
 C5 0.0307(16) 0.0293(16) 0.0168(13) -0.0046(11) 0.0021(12) 0.0043(12)
 C4 0.0228(14) 0.0327(16) 0.0161(12) 0.0000(11) 0.0080(11) 0.0069(12)
 C1 0.0268(16) 0.0275(16) 0.0227(14) -0.0013(11) 0.0075(12) -0.0014(12)
 C6 0.0269(15) 0.0272(16) 0.0251(14) -0.0036(11) 0.0019(12) -0.0028(12)
 C7 0.0221(14) 0.0307(16) 0.0173(12) 0.0000(11) 0.0075(11) 0.0005(11)

_geom_special_details
;
 All esds (except the esd in the dihedral angle between two l.s. planes)
 are estimated using the full covariance matrix.  The cell esds are taken
 into account individually in the estimation of esds in distances, angles
 and torsion angles; correlations between esds in cell parameters are only
 used when they are defined by crystal symmetry.  An approximate (isotropic)
 treatment of cell esds is used for estimating esds involving l.s. planes.
;
loop_
  _geom_bond_atom_site_label_1
  _geom_bond_atom_site_label_2
  _geom_bond_distance
  _geom_bond_site_symmetry_2
  _geom_bond_publ_flag
 I1 C8 2.075(3) . ?
 I2 C11 2.074(3) . ?
 S1 O1 1.4453(19) . ?
 S1 O2 1.432(2) . ?
 S1 N1 1.622(3) . ?
 S1 C1 1.757(3) . ?
 F4 C13 1.341(3) . ?
 F1 C9 1.346(3) . ?
 F2 C10 1.349(3) . ?
 F3 C12 1.341(3) . ?
 N1 C2 1.424(3) . ?
 N1 H1 0.77(4) . ?
 C8 C13 1.386(4) . ?
 C8 C9 1.382(4) . ?
 C13 C12 1.384(4) . ?
 C12 C11 1.381(4) . ?
 C11 C10 1.387(4) . ?
 C10 C9 1.378(4) . ?
 C2 C3 1.390(4) . ?
 C2 C7 1.390(4) . ?
 C3 C4 1.392(4) . ?
 C3 H3 0.91(4) . ?
 C5 C4 1.386(5) . ?
 C5 C6 1.386(4) . ?
 C5 H5 0.93(4) . ?
 C4 H4 0.86(4) . ?
 C1 H1A 0.86(4) . ?
 C1 H1B 0.95(3) . ?
 C1 H1C 0.95(4) . ?
 C6 C7 1.388(4) . ?
 C6 H6 0.96(4) . ?
 C7 H7 0.87(4) . ?

loop_
  _geom_angle_atom_site_label_1
  _geom_angle_atom_site_label_2
  _geom_angle_atom_site_label_3
  _geom_angle
  _geom_angle_site_symmetry_1
  _geom_angle_site_symmetry_3
  _geom_angle_publ_flag
 O1 S1 N1 105.20(12) . . ?
 O1 S1 C1 108.68(14) . . ?
 O2 S1 O1 117.59(13) . . ?
 O2 S1 N1 109.88(13) . . ?
 O2 S1 C1 108.01(14) . . ?
 N1 S1 C1 107.02(14) . . ?
 S1 N1 H1 112(3) . . ?
 C2 N1 S1 125.23(19) . . ?
 C2 N1 H1 118(3) . . ?
 C13 C8 I1 120.5(2) . . ?
 C9 C8 I1 121.73(19) . . ?
 C9 C8 C13 117.7(2) . . ?
 F4 C13 C8 120.4(2) . . ?
 F4 C13 C12 118.7(2) . . ?
 C12 C13 C8 120.9(2) . . ?
 F3 C12 C13 118.3(2) . . ?
 F3 C12 C11 120.2(2) . . ?
 C11 C12 C13 121.4(2) . . ?
 C12 C11 I2 120.74(19) . . ?
 C12 C11 C10 117.3(3) . . ?
 C10 C11 I2 121.9(2) . . ?
 F2 C10 C11 120.2(3) . . ?
 F2 C10 C9 118.4(2) . . ?
 C9 C10 C11 121.4(3) . . ?
 F1 C9 C8 119.9(2) . . ?
 F1 C9 C10 118.9(2) . . ?
 C10 C9 C8 121.2(2) . . ?
 C3 C2 N1 122.2(3) . . ?
 C3 C2 C7 119.9(3) . . ?
 C7 C2 N1 117.8(2) . . ?
 C2 C3 C4 119.3(3) . . ?
 C2 C3 H3 119(2) . . ?
 C4 C3 H3 122(2) . . ?
 C4 C5 C6 119.0(3) . . ?
 C4 C5 H5 120(2) . . ?
 C6 C5 H5 121(2) . . ?
 C3 C4 H4 116(2) . . ?
 C5 C4 C3 121.1(3) . . ?
 C5 C4 H4 123(2) . . ?
 S1 C1 H1A 106(2) . . ?
 S1 C1 H1B 107(2) . . ?
 S1 C1 H1C 107(2) . . ?
 H1A C1 H1B 116(3) . . ?
 H1A C1 H1C 112(3) . . ?
 H1B C1 H1C 108(3) . . ?
 C5 C6 C7 120.5(3) . . ?
 C5 C6 H6 123(2) . . ?
 C7 C6 H6 117(2) . . ?
 C2 C7 H7 119(3) . . ?
 C6 C7 C2 120.1(3) . . ?
 C6 C7 H7 121(3) . . ?

loop_
  _geom_hbond_atom_site_label_D
  _geom_hbond_atom_site_label_H
  _geom_hbond_atom_site_label_A
  _geom_hbond_distance_DH
  _geom_hbond_distance_HA
  _geom_hbond_distance_DA
  _geom_hbond_angle_DHA
  _geom_hbond_site_symmetry_A
  _geom_hbond_publ_flag
 C1 H1A O2 0.86(4) 2.55(4) 3.375(4) 162(3) 1_455 yes
 C3 H3 O2 0.91(4) 2.40(3) 3.053(4) 129(3) . yes
 N1 H1 O1 0.77(4) 2.17(4) 2.934(3) 169(4) 3_567 yes

loop_
  _geom_torsion_atom_site_label_1
  _geom_torsion_atom_site_label_2
  _geom_torsion_atom_site_label_3
  _geom_torsion_atom_site_label_4
  _geom_torsion
  _geom_torsion_site_symmetry_1
  _geom_torsion_site_symmetry_2
  _geom_torsion_site_symmetry_3
  _geom_torsion_site_symmetry_4
  _geom_torsion_publ_flag
 I1 C8 C13 F4 -0.5(4) . . . . ?
 I1 C8 C13 C12 179.2(2) . . . . ?
 I1 C8 C9 F1 0.4(4) . . . . ?
 I1 C8 C9 C10 179.2(2) . . . . ?
 I2 C11 C10 F2 0.6(4) . . . . ?
 I2 C11 C10 C9 179.9(2) . . . . ?
 S1 N1 C2 C3 38.7(4) . . . . ?
 S1 N1 C2 C7 -142.9(2) . . . . ?
 F4 C13 C12 F3 1.5(4) . . . . ?
 F4 C13 C12 C11 -178.9(3) . . . . ?
 F2 C10 C9 F1 0.0(4) . . . . ?
 F2 C10 C9 C8 -178.9(2) . . . . ?
 F3 C12 C11 I2 -1.8(4) . . . . ?
 F3 C12 C11 C10 178.7(2) . . . . ?
 O1 S1 N1 C2 176.8(2) . . . . ?
 O2 S1 N1 C2 -55.8(3) . . . . ?
 N1 C2 C3 C4 179.5(3) . . . . ?
 N1 C2 C7 C6 -177.8(3) . . . . ?
 C8 C13 C12 F3 -178.3(2) . . . . ?
 C8 C13 C12 C11 1.3(4) . . . . ?
 C13 C8 C9 F1 179.8(2) . . . . ?
 C13 C8 C9 C10 -1.3(4) . . . . ?
 C13 C12 C11 I2 178.6(2) . . . . ?
 C13 C12 C11 C10 -0.9(4) . . . . ?
 C12 C11 C10 F2 -180.0(3) . . . . ?
 C12 C11 C10 C9 -0.7(4) . . . . ?
 C11 C10 C9 F1 -179.3(2) . . . . ?
 C11 C10 C9 C8 1.8(4) . . . . ?
 C9 C8 C13 F4 -179.9(2) . . . . ?
 C9 C8 C13 C12 -0.2(4) . . . . ?
 C2 C3 C4 C5 -1.9(4) . . . . ?
 C3 C2 C7 C6 0.7(4) . . . . ?
 C5 C6 C7 C2 -1.9(5) . . . . ?
 C4 C5 C6 C7 1.1(5) . . . . ?
 C1 S1 N1 C2 61.3(3) . . . . ?
 C6 C5 C4 C3 0.8(4) . . . . ?
 C7 C2 C3 C4 1.2(4) . . . . ?

_shelx_res_file
;
TITL th_pm1_mo_autored_a.res in P2(1)/n
    th_pm1_mo_autored.res
    created by SHELXL-2017/1 at 17:17:02 on 26-Nov-2021
REM Old TITL TH_PM1_mo_autored in P2(1)/n
REM SHELXT solution in P2(1)/n
REM R1 0.118, Rweak 0.004, Alpha 0.017, Orientation as input
REM Formula found by SHELXT: C7 N1 O1 I2
REM Instructions for potential hydrogen bonds
CELL 0.71073 5.6059 16.1462 18.2847 90 93.083 90
ZERR 4 0.0002 0.0004 0.0004 0 0.002 0
LATT 1
SYMM 0.5-X,0.5+Y,0.5-Z
SFAC C H F I N O S
UNIT 52 36 16 8 4 8 4
EQIV $1 -1+X,+Y,+Z
EQIV $2 -X,1-Y,2-Z

L.S. 200
PLAN  1
SIZE 0.04 0.08 0.15
TEMP -173.15(10)
CONF
HTAB C1 O2_$1
HTAB C3 O2
HTAB N1 O1_$2
LIST 6
MORE -1
BOND $H
fmap 2
acta
OMIT 3 17 1
REM <olex2.extras>
REM <HklSrc "%.\\TH_PM1_mo_autored.hkl">
REM </olex2.extras>

WGHT    0.025100    1.825000
FVAR       0.43752
I1    4    0.544612    0.704888    1.004734    11.00000    0.02280    0.02277 =
         0.01676   -0.00091    0.00086   -0.00186
I2    4    1.317901    1.014395    1.137270    11.00000    0.02153    0.02556 =
         0.02088   -0.00069    0.00190   -0.00386
S1    7    0.186452    0.551466    0.897194    11.00000    0.02106    0.02649 =
         0.01188   -0.00204    0.00484   -0.00545
F4    3    0.593848    0.800669    1.156947    11.00000    0.02774    0.03474 =
         0.01951   -0.00227    0.01252   -0.00912
F1    3    0.976283    0.799172    0.932827    11.00000    0.03233    0.03294 =
         0.01232   -0.00506    0.00689   -0.00213
F2    3    1.270586    0.918875    0.982801    11.00000    0.02961    0.03636 =
         0.02228   -0.00110    0.01451   -0.01115
F3    3    0.897633    0.916148    1.208631    11.00000    0.03282    0.03479 =
         0.01445   -0.00722    0.00940   -0.00646
O1    6    0.159082    0.580080    0.971168    11.00000    0.03396    0.03334 =
         0.01353   -0.00451    0.00739   -0.01178
O2    6    0.419701    0.556100    0.869181    11.00000    0.02029    0.03945 =
         0.02172   -0.00457    0.00756   -0.00944
N1    5    0.095280    0.456135    0.896438    11.00000    0.02807    0.02366 =
         0.01287   -0.00022    0.00925   -0.00279
C8    1    0.777015    0.796910    1.043344    11.00000    0.01845    0.01826 =
         0.01537   -0.00003    0.00180    0.00081
C13   1    0.761035    0.828607    1.113361    11.00000    0.02036    0.02258 =
         0.01434    0.00028    0.00766   -0.00114
C12   1    0.917241    0.889296    1.139824    11.00000    0.01984    0.02237 =
         0.01354   -0.00195    0.00408    0.00006
C11   1    1.090798    0.921571    1.097214    11.00000    0.02015    0.02278 =
         0.01541   -0.00004    0.00138    0.00139
C10   1    1.104735    0.889934    1.027056    11.00000    0.02135    0.02715 =
         0.01440    0.00256    0.00705    0.00005
C9    1    0.953278    0.828155    1.001089    11.00000    0.02195    0.02298 =
         0.01123   -0.00172    0.00323    0.00243
C2    1    0.078701    0.403819    0.833698    11.00000    0.02185    0.01975 =
         0.01222    0.00128    0.00329    0.00189
C3    1    0.248817    0.404682    0.781166    11.00000    0.02305    0.02099 =
         0.02009    0.00129    0.00533    0.00127
C5    1    0.033698    0.296046    0.714586    11.00000    0.03070    0.02933 =
         0.01683   -0.00461    0.00208    0.00433
C4    1    0.222463    0.351428    0.721389    11.00000    0.02279    0.03266 =
         0.01611   -0.00001    0.00803    0.00692
C1    1   -0.011116    0.607173    0.837726    11.00000    0.02682    0.02749 =
         0.02269   -0.00126    0.00747   -0.00136
C6    1   -0.132508    0.294776    0.768048    11.00000    0.02687    0.02720 =
         0.02506   -0.00363    0.00194   -0.00278
C7    1   -0.112665    0.349122    0.826858    11.00000    0.02210    0.03070 =
         0.01734   -0.00003    0.00747    0.00050
H1A   2   -0.149570    0.601245    0.854744    11.00000    0.01901
H1B   2    0.048359    0.662421    0.835462    11.00000    0.02091
H4    2    0.331494    0.354550    0.689841    11.00000    0.02490
H1C   2   -0.002966    0.583475    0.790373    11.00000    0.03723
H3    2    0.368897    0.442486    0.785544    11.00000    0.02615
H6    2   -0.269039    0.258636    0.765462    11.00000    0.03052
H7    2   -0.219592    0.349413    0.859630    11.00000    0.04192
H5    2    0.023917    0.259605    0.675438    11.00000    0.03463
H1    2    0.011927    0.447381    0.927793    11.00000    0.03237
HKLF 4


REM  th_pm1_mo_autored_a.res in P2(1)/n
REM R1 =  0.0225 for    3519 Fo > 4sig(Fo)  and  0.0273 for all    3945 data
REM    244 parameters refined using      0 restraints

END

WGHT      0.0251      1.8251

REM Highest difference peak  0.717,  deepest hole -0.597,  1-sigma level  0.109
Q1    1   0.5666  0.6406  1.0037  11.00000  0.05    0.72
;
_shelx_res_checksum                62954
_shelx_hkl_file
;
   0   0   2 5818.32 139.462   6
   0   0   2 6095.12 139.555   5
   0   0   3-0.21001 1.98457   6
   0   0   3 2.25617 1.90416   5
   0   0   4 139.840 8.05108   6
   0   0   4 126.261 7.37547   5
   0   0   5 4.28471 3.74611   6
   0   0   5 0.34343 3.46450   5
   0   0   6 14159.0 332.807   3
   0   0   6 14076.8 335.776   6
   0   0   6 14479.8 335.433   5
   0   0   7 2.53435 4.19583   6
   0   0   7-0.69320 2.57107   3
   0   0  -7-0.45013 3.24319   6
   0   0   8 19049.8 439.805   3
   0   0  -8 18483.6 442.425   6
   0   0   9-0.87679 3.12690   3
   0   0  -9 1.71138 3.63000   6
   0   0 -10 1103.78 37.7501   6
   0   0  10 1119.42 35.2203   3
   0   0  11 5.87138 3.44237   3
   0   0  12 163.376 11.7735   3
   0   0 -12 189.827 14.6830   5
   0   0 -13 7.40970 6.11672   5
   0   0  13 3.81192 4.04345   3
   0   0 -13 2.49253 6.71996   1
   0   0 -13 0.81123 4.74907   6
   0   0 -14 5963.70 160.542   6
   0   0  14 6196.37 156.765   3
   0   0 -14 6466.23 171.062   1
   0   0  15 7.33542 4.09487   3
   0   0 -15-2.82828 7.62518   1
   0   0 -15 0.92721 5.90076   6
   0   0 -16 546.593 28.3978   6
   0   0  16 566.841 25.8724   3
   0   0 -16 595.064 34.4239   1
   0   0  17 14.4277 5.47291   3
   0   0 -17-3.16940 9.27799   1
   0   0 -17 10.3694 7.47388   6
   0   0 -18 212.547 18.0479   6
   0   0  18 244.633 16.9560   3
   0   0  19 12.6051 6.17098   3
   0   0 -19-1.14208 7.45222   6
   0   0 -19-3.52936 9.68373   1
   0   0 -20 734.272 37.0864   6
   0   0  20 859.736 36.5035   3
   0   0 -20 764.618 44.5235   1
   0   0 -21 17.4570 9.88206   1
   0   0  21-5.39276 9.51749   3
   0   0 -21-1.24462 10.3029   6
   0   0  22 1632.31 56.4886   3
   0   0 -22 1320.51 55.6987   6
   0   0  23-4.61308 10.1091   3
   0   0 -23-2.68236 9.16771   6
   0   0  24 18.7402 11.0759   3
   0   1  -2 298.107 9.25348   3
   0  -1   2 267.184 10.2910   6
   0   1  -3 3576.79 84.7565   3
   0  -1   3 3514.26 86.9116   6
   0   1   3 3459.22 84.1263   6
   0   1   3 3553.56 85.0366   5
   0   1  -4 136.735 6.89145   3
   0  -1   4 155.245 8.81574   6
   0   1   4 135.381 7.17013   6
   0   1   4 133.570 7.45876   5
   0   1  -5 262.550 10.8339   3
   0  -1   5 265.468 13.0531   6
   0   1   5 258.025 11.4947   6
   0   1   5 263.723 11.8315   5
   0  -1   6 100.408 8.46024   6
   0   1   6 88.5163 7.26308   6
   0  -1  -6 98.1159 7.09353   6
   0  -1   6 109.309 6.91134   3
   0   1  -6 94.9018 6.59521   3
   0   1   6 99.0694 7.43628   5
   0  -1   7 1771.93 47.8556   3
   0  -1   7 1714.89 51.7322   6
   0   1   7 1764.98 49.6645   6
   0  -1  -7 1756.85 48.6262   6
   0   1   7 1738.52 49.7536   5
   0  -1   8 479.268 18.3916   3
   0  -1  -8 495.187 19.4117   6
   0   1   8 488.734 20.4723   5
   0  -1  -9 152.860 10.3147   6
   0   1  -9 147.452 11.3520   6
   0  -1   9 148.416 9.51068   3
   0   1   9 144.615 9.50161   3
   0  -1  -9 129.480 10.5397   5
   0   1   9 135.709 10.6742   5
   0  -1  10 250.755 12.1270   3
   0   1  10 255.016 12.3382   3
   0  -1 -10 268.726 13.5460   6
   0  -1 -11 5612.88 142.498   6
   0   1  11 5582.15 140.505   3
   0  -1  11 5574.73 140.200   3
   0   1  12 391.081 18.8108   3
   0  -1  12 429.586 19.3221   3
   0   1 -12 434.487 25.6880   1
   0   1 -13 50.5503 8.57686   6
   0  -1  13 55.4215 7.23557   3
   0   1 -13 59.2288 9.81396   5
   0   1  13 67.9759 7.98154   3
   0   1 -13 59.7678 10.9226   1
   0   1 -14 550.763 27.4358   6
   0  -1 -14 552.811 26.0857   6
   0  -1  14 562.860 24.5157   3
   0   1  14 536.036 24.1292   3
   0   1 -14 602.269 32.5826   1
   0   1 -14 575.696 28.9256   5
   0  -1 -15 2267.76 72.9601   6
   0   1 -15 2322.12 75.2988   6
   0  -1  15 2550.89 71.6985   3
   0   1  15 2480.77 71.2738   3
   0   1 -15 2460.11 82.9148   1
   0   1 -15 2445.85 77.6644   5
   0  -1  16 56.5852 8.15249   3
   0   1  16 43.5616 8.20914   3
   0   1 -16 42.8660 9.35035   6
   0  -1 -16 42.3666 8.96883   6
   0   1 -16 52.4046 12.6274   1
   0  -1  17 1088.44 40.6927   3
   0   1  17 1181.13 41.8010   3
   0   1 -17 1145.71 51.5492   1
   0   1 -17 1094.97 44.6854   6
   0  -1 -17 1018.37 42.1471   6
   0   1 -18 88.8294 13.6508   6
   0  -1 -18 121.589 13.8533   6
   0   1 -18 115.474 17.5820   1
   0  -1  18 107.757 11.7396   3
   0   1  18 132.459 12.7542   3
   0   1 -19 1233.87 51.3199   6
   0  -1 -19 1207.38 49.1813   6
   0   1 -19 1306.83 59.2215   1
   0  -1  19 1424.85 49.3713   3
   0   1  19 1449.93 49.7026   3
   0  -1 -20 236.524 20.0241   6
   0  -1  20 235.712 18.7491   3
   0   1  20 255.221 19.3320   3
   0   1 -20 201.514 23.9068   1
   0   1 -21 79.4254 17.7871   1
   0  -1 -21 82.3136 13.7075   6
   0   1 -21 101.793 15.1409   6
   0  -1  21 105.923 14.0011   3
   0   1  21 98.4609 13.6419   3
   0  -1  22 212.805 18.1817   3
   0  -1 -22 172.268 18.4875   6
   0   1 -22 171.937 19.3211   6
   0   1 -23 107.883 16.8646   6
   0  -1  23 71.4713 12.6666   3
   0   1  23 65.6788 13.3189   3
   0  -1  24 95.0578 14.7484   3
   0   1  24 119.002 16.0410   3
   0   2   0 691.199 19.2160   6
   0  -2   0 786.187 20.7714   4
   0  -2   1 1.43291 1.54720   4
   0  -2   2 4605.69 111.526   6
   0   2  -3 1374.89 36.1840   3
   0  -2   3 1352.43 38.5302   6
   0   2  -4 29573.3 640.539   3
   0   2   4 26975.2 637.858   6
   0  -2  -4 26829.3 637.448   6
   0  -2   4 29135.6 643.979   6
   0  -2  -5 352.744 12.0062   6
   0  -2   5 351.961 15.8677   6
   0   2   5 314.805 12.1920   6
   0   2  -5 349.667 13.4129   3
   0   2  -5 315.560 15.5115   1
   0   2   5 322.201 13.3695   5
   0  -2   6 1303.62 40.5980   6
   0  -2  -6 1243.03 35.2333   6
   0   2   6 1267.33 36.0844   6
   0   2  -6 1291.75 36.7632   3
   0  -2   6 1350.05 37.0338   3
   0   2  -6 1257.80 41.1298   1
   0   2   6 1281.50 37.3603   5
   0   2   7 114.754 8.08941   6
   0  -2  -7 112.958 7.46772   6
   0  -2   7 119.323 7.99010   3
   0   2  -7 109.660 7.80966   3
   0   2  -7 123.851 10.9897   1
   0   2   7 115.330 8.66676   5
   0  -2  -8 371.454 15.5457   6
   0  -2   8 383.137 16.1686   3
   0   2  -8 367.253 15.8810   3
   0   2  -8 353.339 20.1254   1
   0   2   8 366.955 17.2561   5
   0   2  -9 13.7918 3.90084   3
   0  -2   9 8.58700 3.61545   3
   0   2  -9 15.9159 6.18282   1
   0  -2  -9 14.1798 4.28053   6
   0   2   9 10.4225 4.69103   5
   0  -2 -10 3139.01 82.6207   6
   0  -2  10 3165.24 82.8007   3
   0   2 -10 3115.74 91.2239   1
   0   2  10 2943.92 84.6021   5
   0  -2 -11 76.3355 7.79301   6
   0  -2  11 68.3347 7.57518   3
   0   2 -11 73.4775 10.7597   1
   0   2  11 71.9853 8.83550   5
   0   2 -12 6320.77 169.621   1
   0  -2 -12 6177.66 159.344   6
   0   2 -12 6458.30 164.482   6
   0  -2  12 6523.66 159.129   3
   0   2  12 6171.46 158.838   3
   0  -2  13 2.62390 4.58253   3
   0   2  13-0.67263 4.22516   3
   0   2 -13 3.71484 5.18329   6
   0   2 -13 3.73146 6.82518   1
   0   2 -14 171.765 15.8143   5
   0  -2  14 195.122 13.5797   3
   0   2  14 190.423 13.6106   3
   0   2 -14 196.099 18.8218   1
   0   2 -14 194.959 16.0572   6
   0   2 -15 211.169 18.0632   5
   0   2  15 213.862 14.8813   3
   0  -2  15 205.127 14.4842   3
   0   2 -15 217.026 20.1774   1
   0   2 -15 221.298 17.7756   6
   0  -2 -15 209.631 15.5979   6
   0   2 -16 812.353 37.6122   5
   0  -2  16 820.292 32.7362   3
   0   2  16 825.548 32.9214   3
   0   2 -16 750.962 39.9518   1
   0   2 -16 796.389 36.5372   6
   0  -2 -16 761.259 32.9194   6
   0   2 -17 498.778 29.3346   5
   0  -2 -17 448.243 24.5115   6
   0   2 -17 402.148 25.7425   6
   0   2 -17 429.558 30.2482   1
   0   2  17 414.084 22.9120   3
   0  -2  17 496.977 24.4011   3
   0  -2 -18 3450.22 105.259   6
   0   2 -18 3485.33 109.471   6
   0   2 -18 3757.09 118.804   1
   0  -2  18 4008.53 106.165   3
   0   2  18 3895.43 105.833   3
   0   2 -19 485.528 29.9092   6
   0  -2 -19 493.573 27.4897   6
   0   2 -19 428.238 32.4536   1
   0   2  19 534.376 27.3982   3
   0  -2  19 570.466 27.8377   3
   0  -2 -20 251.271 19.5208   6
   0   2 -20 234.558 21.0938   6
   0  -2  20 252.516 19.4005   3
   0   2  20 214.068 18.5480   3
   0   2 -20 206.227 23.6649   1
   0   2  21 7.72774 8.26614   3
   0  -2  21-8.65040 10.0377   3
   0   2 -21-1.92862 10.9416   1
   0   2 -21 2.73256 8.46823   6
   0   2 -22 15.5533 10.8805   6
   0   2  22 5.78598 10.2150   3
   0  -2  22 15.8055 8.76490   3
   0   2  23 147.053 17.5860   3
   0  -2  23 167.631 18.2131   3
   0   2 -23 179.688 20.6954   6
   0   2  24 728.243 36.8696   3
   0  -2  24 779.330 37.7830   3
   0  -3   0 0.27526 2.17277   4
   0   3   0 2.61070 2.12835   6
   0  -3   1 2993.86 74.6248   4
   0   3  -1 2952.19 73.4405   6
   0   3  -2 793.457 22.6706   1
   0   3  -2 823.691 24.8054   6
   0   3  -3 24.6064 4.01466   1
   0   3  -3 25.6229 3.92210   3
   0   3  -4 395.496 16.0119   1
   0   3  -4 384.367 14.7551   3
   0  -3  -5 2302.74 54.1988   6
   0   3   5 2103.75 54.3058   6
   0   3  -5 2162.50 57.9446   3
   0   3  -5 2205.39 60.9397   1
   0   3   6 620.505 19.9988   6
   0  -3  -6 648.489 19.5388   6
   0   3  -6 667.071 22.6354   3
   0  -3   6 670.395 22.5697   3
   0   3  -6 633.507 25.4365   1
   0   3   6 662.061 22.2519   5
   0  -3  -7 12815.3 304.138   6
   0  -3   7 13234.0 307.798   3
   0   3  -7 12938.7 307.668   3
   0   3  -7 12760.6 313.050   1
   0   3   7 13235.1 307.898   5
   0  -3  -8 2226.03 59.4780   6
   0  -3   8 2311.70 62.4521   3
   0   3  -8 2276.75 62.1659   3
   0   3  -8 2231.64 67.7478   1
   0   3   8 2302.93 63.1045   5
   0  -3  -9 856.138 28.0738   6
   0   3  -9 877.219 29.7433   3
   0  -3   9 869.483 29.9219   3
   0   3  -9 904.418 35.5492   1
   0   3   9 860.497 30.7830   5
   0  -3 -10 1353.51 41.7326   6
   0   3 -10 1431.92 43.4806   3
   0  -3  10 1459.39 44.0527   3
   0   3 -10 1404.03 50.0375   1
   0   3  10 1386.55 45.1033   5
   0   3 -11 72.7642 10.9453   1
   0  -3 -11 72.3692 7.54566   6
   0   3 -11 84.8994 10.3729   6
   0  -3  11 76.0455 8.12981   3
   0   3 -11 79.3122 7.98306   3
   0   3  11 85.8458 9.73070   5
   0   3 -12 234.581 18.7544   1
   0   3 -12 230.274 16.7825   6
   0  -3 -12 226.313 13.6340   6
   0  -3  12 217.030 13.9042   3
   0   3 -12 243.715 14.3240   3
   0   3  12 208.634 15.0139   5
   0  -3  13 2003.22 59.3401   3
   0   3 -13 1921.88 67.8303   1
   0   3 -13 2010.14 64.4580   6
   0  -3 -13 1869.99 57.4925   6
   0   3 -14 253.251 21.4733   1
   0  -3 -14 291.048 22.3186   1
   0  -3  14 284.798 16.8965   3
   0   3  14 289.559 17.1961   3
   0   3 -14 328.586 21.1262   6
   0   3  15 4021.87 108.739   3
   0  -3  15 4095.03 108.718   3
   0   3 -15 3865.00 119.099   1
   0  -3 -15 3871.01 119.078   1
   0   3 -15 3915.51 114.160   6
   0   3 -16 161.708 16.9423   5
   0   3 -16 167.941 16.8866   6
   0  -3 -16 137.672 13.2695   6
   0  -3  16 188.614 14.6402   3
   0   3  16 161.849 14.1079   3
   0   3 -16 168.117 18.5107   1
   0  -3 -16 170.074 18.6839   1
   0   3 -17 66.5403 12.7674   5
   0  -3  17 69.5239 10.4420   3
   0   3  17 63.5205 9.87557   3
   0   3 -17 82.0434 15.3374   1
   0  -3 -17 99.5988 16.1902   1
   0  -3 -17 69.7833 10.3397   6
   0   3 -17 66.0158 12.0576   6
   0  -3 -18 196.543 16.7541   6
   0   3 -18 235.751 20.6815   6
   0  -3  18 229.978 17.3153   3
   0   3  18 216.516 17.0131   3
   0  -3 -18 220.603 22.4490   1
   0   3 -18 243.036 23.5552   1
   0   3 -18 217.565 20.7056   5
   0   3 -19 155.058 18.1033   6
   0  -3  19 166.425 15.9702   3
   0   3  19 189.449 16.6675   3
   0  -3 -19 191.263 22.0452   1
   0   3 -19 179.968 21.6641   1
   0  -3  20-1.05339 9.10774   3
   0   3  20 8.64055 7.62487   3
   0  -3 -20-3.68331 10.7800   1
   0   3 -20-1.83506 10.5775   1
   0   3 -20 9.66768 9.85095   6
   0   3  21 1228.15 47.7911   3
   0  -3  21 1285.21 48.3331   3
   0  -3 -21 1150.75 56.8731   1
   0   3 -21 1134.50 57.0293   1
   0   3 -21 1102.93 51.0534   6
   0   3 -22 309.471 26.2177   6
   0  -3  22 341.221 24.1515   3
   0   3  22 371.025 24.5032   3
   0   3  23 949.289 42.3894   3
   0   3  24 119.990 16.1784   3
   0  -4   0 3762.03 94.6915   4
   0   4   0 3775.93 91.6405   6
   0  -4   1 419.522 16.1044   4
   0   4  -1 383.264 14.4018   6
   0   4   1 369.767 12.0623   6
   0  -4  -2 833.417 23.4122   1
   0   4  -2 837.954 23.3907   1
   0   4  -2 864.614 26.8875   6
   0   4  -3 2.13770 3.59320   6
   0   4  -3 2.60954 2.78827   1
   0  -4  -3 5.52810 3.26203   1
   0   4  -4 2279.47 61.5682   6
   0   4  -4 2261.23 59.4705   3
   0  -4  -4 2174.35 59.3824   1
   0   4  -4 2183.16 59.2529   1
   0   4  -5 2364.08 62.9472   3
   0  -4  -5 2373.20 64.4646   1
   0   4  -5 2311.86 64.2138   1
   0   4  -6 631.856 23.0057   3
   0  -4  -6 624.941 24.9401   1
   0   4  -6 630.138 24.9387   1
   0   4   7 6.98315 3.64346   5
   0   4  -7 11.1738 4.02456   3
   0   4  -7 4.70414 4.38729   1
   0  -4  -7 2.71786 4.79915   1
   0   4  -8 4691.63 118.316   3
   0   4  -8 4635.09 123.415   1
   0  -4  -8 4830.37 124.261   1
   0   4   8 4508.81 117.720   5
   0  -4  -9 443.108 16.6362   6
   0   4  -9 434.622 19.4711   3
   0  -4   9 431.539 19.3156   3
   0   4  -9 451.808 23.0263   1
   0   4   9 433.180 19.4032   5
   0  -4 -10 172.512 10.1019   6
   0  -4  10 184.308 12.1862   3
   0   4 -10 166.801 11.6173   3
   0   4 -10 186.728 15.0392   1
   0   4  10 178.248 12.5433   5
   0  -4 -11 837.454 28.3192   6
   0  -4  11 825.300 31.1493   3
   0   4 -11 826.705 30.5915   3
   0  -4 -11 884.925 37.3639   1
   0   4 -11 760.842 35.1553   1
   0   4  11 842.658 32.1228   5
   0   4 -11 866.864 34.6391   5
   0  -4  12 30.9728 6.57474   3
   0   4 -12 23.8130 5.95111   3
   0   4 -12 23.6866 8.54895   1
   0  -4 -12 29.8031 8.44830   1
   0  -4 -12 28.7874 5.55611   6
   0   4 -12 27.1565 7.42041   5
   0   4  12 40.0947 7.85093   5
   0  -4 -13 583.960 31.6197   1
   0   4 -13 677.408 33.2407   1
   0   4 -13 642.737 30.5428   6
   0  -4 -13 589.789 24.2986   6
   0  -4  13 623.040 26.7043   3
   0   4 -13 606.008 25.7949   3
   0   4  13 549.158 26.6125   5
   0  -4  14 2259.90 63.4785   3
   0   4 -14 2088.44 71.0533   1
   0  -4 -14 2161.49 72.0493   1
   0   4 -14 2258.35 69.2727   6
   0  -4  15 173.671 14.0899   3
   0   4 -15 192.106 18.7548   1
   0  -4 -15 128.608 16.6843   1
   0   4 -15 175.897 16.7174   6
   0  -4 -16 1056.99 48.5969   1
   0   4 -16 1027.54 47.9409   1
   0   4 -16 1101.38 46.2673   6
   0  -4  16 1149.73 41.8000   3
   0   4  16 1082.94 41.2042   3
   0   4  17 0.94280 6.58879   3
   0  -4  17 14.8218 7.06623   3
   0  -4 -17 6.29853 8.49222   1
   0   4 -17 15.6063 10.6691   1
   0   4 -17 15.3858 8.76597   6
   0   4 -18 259.385 21.7875   6
   0   4  18 266.452 18.9877   3
   0  -4  18 243.769 18.4283   3
   0  -4 -18 218.999 22.9461   1
   0   4 -18 252.510 24.2740   1
   0   4 -18 236.783 21.9375   5
   0   4 -19 391.139 27.6663   6
   0  -4  19 334.109 22.5365   3
   0   4  19 361.915 23.0547   3
   0  -4 -19 366.617 29.2833   1
   0   4 -19 357.834 29.1487   1
   0   4 -19 393.179 27.9428   5
   0   4  20 332.697 22.1972   3
   0   4 -20 252.367 26.0619   1
   0  -4 -20 293.143 27.2822   1
   0   4 -20 265.883 23.5473   6
   0   4  21 417.561 25.7683   3
   0   4 -21 347.346 31.2912   1
   0  -4 -21 415.064 33.4023   1
   0   4 -21 379.933 28.8477   6
   0   4 -22 930.499 47.4050   6
   0   4  22 1062.22 44.3212   3
   0   4  23 128.819 16.0852   3
   0   4  24 1.24690 8.71028   3
   0   5   0 1.12502 2.57937   6
   0  -5   1 32.9271 5.32603   4
   0   5   1 34.5918 3.65431   6
   0  -5   2 3002.04 82.1048   4
   0   5   2 3098.16 74.8531   6
   0   5  -2 3101.85 80.6845   6
   0   5  -2 3187.57 75.6991   1
   0  -5  -2 3148.43 75.6948   1
   0   5  -3 19786.5 467.820   6
   0  -5  -3 19992.6 463.409   1
   0   5  -3 20007.1 463.366   1
   0  -5  -4 35.3879 5.02338   1
   0   5  -4 28.9881 4.85136   1
   0   5  -4 36.4982 5.71165   6
   0   5  -5 7776.53 185.977   3
   0  -5  -5 7571.87 185.641   1
   0   5  -5 7475.91 185.241   1
   0   5  -5 7682.78 188.336   6
   0   5  -6 2236.86 61.7811   3
   0   5  -6 2162.39 62.3716   1
   0  -5  -6 2214.38 63.0759   1
   0   5  -7 32.9508 6.30543   1
   0  -5  -7 53.6003 7.72691   1
   0   5  -7 46.8393 6.45241   3
   0   5  -8 843.323 30.1648   3
   0   5   8 831.392 28.8376   5
   0  -5  -8 823.733 32.6203   1
   0   5  -8 815.212 32.3891   1
   0   5  -9 5817.27 145.108   3
   0   5   9 5568.02 143.792   5
   0   5  -9 5823.21 149.835   1
   0   5 -10 650.434 26.1173   3
   0   5  10 624.142 25.5910   5
   0   5 -10 620.863 29.2568   1
   0   5 -11 9610.49 228.781   3
   0   5  11 8905.20 228.281   5
   0   5 -11 9349.39 233.032   5
   0   5 -11 9056.69 235.045   1
   0  -5 -11 9575.80 236.451   1
   0   5 -12 4.85802 5.68794   5
   0   5  12 6.80870 5.45156   5
   0  -5 -12 7.88785 6.18385   1
   0   5 -12 2.21412 6.28131   1
   0   5 -12 0.71388 4.54362   3
   0  -5 -13 633.013 32.3503   1
   0   5 -13 581.289 31.3017   1
   0   5 -13 626.622 26.9506   3
   0   5 -13 643.111 30.9137   5
   0   5  13 608.068 27.5727   5
   0   5 -14 93.0623 12.4901   5
   0   5 -14 68.8613 12.5798   1
   0  -5 -14 76.7429 12.4799   1
   0   5 -14 69.7110 9.22051   3
   0   5 -14 83.2341 12.3040   6
   0   5  14 65.3331 10.1625   5
   0   5 -15 32.6700 10.5203   1
   0  -5 -15 52.8539 11.4706   1
   0   5 -15 45.0674 8.30631   3
   0   5 -15 46.3913 10.5301   6
   0   5 -16 88.4524 14.6398   1
   0  -5 -16 65.1043 12.7156   1
   0   5 -16 61.8340 12.2074   6
   0   5 -17 1497.76 58.6671   6
   0   5  17 1550.83 53.6691   3
   0  -5 -17 1556.39 62.2022   1
   0   5 -17 1450.71 60.7548   1
   0   5  18 8.25932 7.13930   3
   0  -5 -18 11.5459 9.80311   1
   0   5 -18 12.9934 10.0698   1
   0   5 -18 14.0447 9.81423   6
   0   5 -19 1307.46 55.0744   6
   0   5  19 1294.86 49.0409   3
   0  -5 -19 1221.34 56.5938   1
   0   5 -19 1222.44 56.5877   1
   0   5 -20 178.076 20.3791   6
   0   5 -20 110.139 16.9636   5
   0   5  20 150.366 15.6189   3
   0  -5 -20 171.501 21.6203   1
   0   5 -20 138.547 20.6894   1
   0   5  21 183.834 17.7252   3
   0   5 -21 174.420 21.7672   1
   0  -5 -21 162.518 21.8598   1
   0   5 -21 148.881 19.0826   6
   0   5  22 6.05731 8.72968   3
   0   5  23 37.5567 11.4417   3
   0   5  24 34.0468 10.9304   3
   0   6   0 692.619 22.5066   6
   0   6  -1 401.258 18.4421   4
   0   6   1 403.914 14.5238   6
   0   6  -1 440.902 17.0007   6
   0   6  -2 35.1178 5.46396   6
   0  -6  -2 35.2043 3.58047   2
   0   6  -2 32.8698 5.71006   4
   0   6   2 31.9296 3.49413   6
   0  -6  -2 35.0924 3.22018   1
   0   6  -2 32.3140 2.98589   1
   0   6  -3 178.144 11.9392   4
   0  -6  -3 178.870 8.44934   1
   0   6  -3 184.621 8.49649   1
   0   6   3 161.937 6.26154   6
   0   6  -3 159.164 10.8843   6
   0   6  -4 2601.89 67.5921   1
   0  -6  -4 2581.42 67.5561   1
   0   6  -4 2622.44 72.2505   6
   0   6  -5 6.86357 4.08640   3
   0   6  -5 16.4623 5.24572   6
   0  -6  -5 10.2022 4.17987   1
   0   6  -5 10.1388 3.85093   1
   0   6  -6 682.896 26.5150   3
   0   6  -6 674.937 25.7039   1
   0  -6  -6 696.454 26.2571   1
   0   6  -6 681.128 28.3096   6
   0   6  -7 69.7034 7.63393   3
   0   6  -7 71.1921 8.16988   1
   0  -6  -7 61.4950 7.86931   1
   0   6  -8 1628.00 50.8558   3
   0  -6  -8 1658.38 52.8840   1
   0   6  -8 1650.92 52.7166   1
   0   6  -9 1545.06 48.9978   3
   0   6   9 1519.18 46.5556   5
   0   6  -9 1527.75 51.1035   1
   0   6 -10 1048.90 39.3439   5
   0   6  10 995.605 35.3324   5
   0   6 -10 1047.94 40.6257   6
   0   6 -10 1014.43 36.6304   3
   0   6 -10 1011.26 39.4877   1
   0   6  11 42.7729 7.57272   5
   0   6 -11 52.5702 7.67078   3
   0  -6 -11 62.2886 10.1010   1
   0   6 -11 53.0907 9.25948   1
   0   6 -11 48.4937 8.83757   5
   0   6 -12 75.3298 9.37877   3
   0  -6 -12 72.1078 11.0286   1
   0   6 -12 54.4114 9.99679   1
   0   6 -12 93.0490 11.4752   5
   0   6  12 74.8110 9.33050   5
   0   6 -13 275.085 16.9465   3
   0  -6 -13 241.924 19.5246   1
   0   6 -13 232.926 19.1910   1
   0   6 -13 217.299 17.8019   5
   0   6  13 224.002 15.7387   5
   0   6 -14 1532.53 50.6784   3
   0  -6 -14 1437.25 56.4688   1
   0   6 -14 1456.38 56.3666   1
   0   6  14 1510.33 51.0107   5
   0   6 -14 1496.20 55.1413   5
   0   6 -15 893.537 40.5006   6
   0   6 -15 870.100 34.7316   3
   0   6 -15 828.867 40.3882   1
   0  -6 -15 824.066 40.5151   1
   0   6 -15 876.903 39.5406   5
   0   6  15 778.215 34.2974   5
   0   6 -16 818.830 39.1484   5
   0   6 -16 887.121 41.3257   6
   0   6 -16 841.631 34.9054   3
   0  -6 -16 778.173 40.5669   1
   0   6 -16 836.913 41.4732   1
   0  -6 -17 1867.78 71.7603   1
   0   6 -17 1926.88 72.0485   1
   0   6 -17 2021.05 71.5869   6
   0  -6 -18 190.093 21.0624   1
   0   6 -18 195.711 21.4011   1
   0   6 -18 197.417 20.5891   6
   0   6 -19 114.370 16.9653   6
   0   6  19 133.148 15.1291   3
   0  -6 -19 113.682 17.5086   1
   0   6 -19 121.841 18.1346   1
   0   6 -20 11.0972 10.7160   6
   0   6  20 5.74334 7.85278   3
   0   6 -20 1.78681 10.6171   1
   0  -6 -20 7.26014 11.0974   1
   0   6 -21-2.54565 14.9013   2
   0  -6 -21 7.19470 14.6626   2
   0   6  21 8.32203 8.30597   3
   0   6  22 597.920 32.6031   3
   0   6  23 408.651 27.3995   3
   0   7   0-0.37968 3.32803   6
   0   7   1 7632.66 180.263   6
   0   7  -1 7437.72 183.001   6
   0   7  -2 2022.60 51.7936   2
   0  -7  -2 2049.72 51.6467   2
   0   7   2 2086.23 53.5474   6
   0   7  -2 2120.00 59.0074   6
   0   7  -2 2113.50 61.9399   4
   0  -7  -2 2175.78 51.4734   1
   0   7  -2 2138.22 51.4148   1
   0   7  -3 141.873 11.0813   4
   0   7  -3 144.815 10.7398   6
   0   7   3 136.712 6.25296   6
   0   7  -3 154.110 7.46181   1
   0  -7  -3 146.295 7.50323   1
   0  -7  -3 154.223 8.32474   2
   0  -7  -4 194.055 9.95408   1
   0   7  -4 206.116 10.0696   1
   0   7  -4 193.287 13.1345   6
   0  -7  -5 445.680 18.1165   1
   0   7  -5 452.547 18.0725   1
   0   7  -5 437.528 21.2257   6
   0   7  -6 1004.54 37.0717   6
   0   7  -6 987.391 33.4130   1
   0  -7  -6 1009.78 33.6858   1
   0   7  -6 997.908 36.2211   3
   0   7  -7 9832.53 242.840   6
   0   7  -7 9776.42 240.213   3
   0  -7  -7 9742.15 238.633   1
   0   7  -7 9769.75 238.631   1
   0   7  -8 37.8389 6.96468   3
   0   7  -8 49.3116 8.57246   6
   0   7  -8 45.4822 7.94405   1
   0  -7  -8 34.2849 7.38024   1
   0   7  -9 4812.55 126.683   3
   0   7  -9 4796.71 127.726   1
   0   7  -9 4780.11 130.627   6
   0   7 -10 425.389 23.0844   5
   0   7  10 401.291 19.1228   5
   0   7 -10 357.550 22.4409   6
   0   7 -10 392.593 20.6838   3
   0   7 -10 376.842 21.5601   1
   0   7  11 2.02857 4.67406   5
   0   7 -11 8.01765 5.54171   3
   0  -7 -11 4.01700 5.60555   1
   0   7 -11 8.86650 6.80900   1
   0   7 -11-0.98014 6.07568   5
   0   7 -11 6.49047 5.72823   6
   0   7 -12 791.648 36.7850   6
   0   7 -12 831.737 33.1243   3
   0  -7 -12 845.026 36.8772   1
   0   7 -12 725.025 34.6842   1
   0   7 -12 827.630 35.8018   5
   0   7  12 782.186 31.3214   5
   0   7 -13 1377.61 47.2529   3
   0   7 -13 1300.07 51.0236   1
   0  -7 -13 1349.13 51.8864   1
   0   7 -13 1312.57 50.5247   5
   0   7  13 1359.31 46.3210   5
   0   7 -14 419.864 22.5760   3
   0  -7 -14 392.947 25.6801   1
   0   7 -14 389.526 25.4848   1
   0   7  14 360.804 20.9116   5
   0   7 -14 395.286 25.1481   5
   0   7 -15 2423.36 71.8033   3
   0   7 -15 2176.95 76.6934   1
   0  -7 -15 2329.99 78.2293   1
   0   7 -15 2374.52 76.9342   5
   0   7  15 2089.15 69.3054   5
   0   7 -16 263.130 22.2976   6
   0   7 -16 276.020 18.8577   3
   0  -7 -16 246.373 22.3828   1
   0   7 -16 252.705 22.4759   1
   0   7  16 222.176 17.8408   5
   0   7 -16 287.106 22.3467   5
   0   7 -17 309.925 24.1260   5
   0   7 -17 310.046 24.8312   6
   0   7 -17 260.447 23.9045   1
   0  -7 -17 310.342 25.9131   1
   0   7 -17 331.871 21.3641   3
   0   7 -18 28.8797 11.8129   5
   0  -7 -18 56.7704 13.2595   1
   0   7 -18 54.0792 13.2044   1
   0   7 -18 39.4427 11.9151   6
   0  -7 -19 17.1526 12.3621   1
   0   7 -19 3.36757 10.5804   1
   0   7 -19 22.1132 11.6097   6
   0   7 -20 427.028 31.0370   6
   0   7  20 393.835 25.3900   3
   0  -7 -20 376.470 30.4500   1
   0   7 -20 378.450 30.4795   1
   0  -7 -20 357.606 32.9970   2
   0   7 -20 374.795 35.4361   2
   0   7  21 1311.42 51.3522   3
   0   7 -21 1245.77 67.8087   2
   0  -7 -21 1253.65 65.4690   2
   0   7  22 18.6620 10.3077   3
   0   7  23 454.817 29.0981   3
   0   8   0 2574.33 68.2942   6
   0   8  -1 1206.83 37.5671   6
   0   8   1 1201.27 35.0614   6
   0   8   2 3621.33 90.0630   6
   0   8  -2 3657.33 95.8282   6
   0   8  -2 3697.35 99.9564   4
   0  -8  -3 230.064 10.0828   2
   0   8  -3 229.109 10.0365   2
   0   8   3 237.311 9.37219   6
   0   8  -3 217.375 13.8333   6
   0   8  -3 246.482 9.63800   1
   0  -8  -3 241.889 9.64729   1
   0   8  -4 4307.41 109.522   2
   0  -8  -4 4369.17 110.230   2
   0   8  -4 4436.84 108.294   1
   0  -8  -4 4382.84 108.391   1
   0   8  -4 4460.51 115.963   6
   0   8   4 4403.85 103.437   6
   0   8  -5 2102.40 57.4396   1
   0  -8  -5 2126.20 57.6256   1
   0   8  -5 2056.18 63.1176   6
   0   8  -6 11.3972 5.42320   3
   0   8  -6 12.9839 5.23345   6
   0   8  -6 10.9338 4.31469   1
   0  -8  -6 4.22461 3.61520   1
   0   8  -7 0.92577 4.42469   4
   0   8  -7 1.55725 4.48817   3
   0  -8  -7 2.48975 3.85807   1
   0   8  -7 3.68589 3.90927   1
   0   8  -7-0.87421 4.87912   6
   0   8  -8 113.501 12.0007   6
   0   8  -8 102.925 10.8333   3
   0  -8  -8 103.942 10.3654   1
   0   8  -8 112.516 10.7357   1
   0   8  -8 106.449 11.6530   4
   0   8  -9 574.440 29.1422   6
   0   8  -9 672.647 28.6980   3
   0   8  -9 623.242 27.5870   1
   0   8 -10 4626.41 126.395   6
   0   8 -10 4522.56 121.348   3
   0   8 -10 4527.95 122.072   1
   0   8  10 4355.01 116.397   5
   0   8 -11 133.640 14.7641   6
   0   8 -11 152.217 13.6807   3
   0   8 -11 130.964 13.5693   1
   0  -8 -11 171.754 15.1841   1
   0   8 -11 158.677 15.3761   5
   0   8  11 148.632 11.9717   5
   0   8 -12 1695.16 60.5796   6
   0   8 -12 1690.81 55.4099   3
   0   8 -12 1588.07 57.2747   1
   0  -8 -12 1694.17 58.5637   1
   0   8  12 1585.94 52.0667   5
   0   8 -12 1720.80 59.1917   5
   0   8 -13 1375.73 53.6936   6
   0   8 -13 1426.88 49.2820   3
   0   8 -13 1469.73 53.5649   5
   0   8  13 1398.34 47.2217   5
   0   8 -13 1286.96 51.3821   1
   0  -8 -13 1334.92 51.9288   1
   0   8 -14 38.2372 10.3144   5
   0   8  14 29.9454 7.68600   5
   0   8 -14 38.6590 8.94856   3
   0  -8 -14 30.2412 9.80629   1
   0   8 -14 27.2406 9.04073   1
   0   8  15 3.61052 6.43858   5
   0   8 -15 2.59022 8.02747   5
   0   8 -15 6.62396 8.53780   1
   0  -8 -15 4.04503 8.12839   1
   0   8 -15 1.98864 6.32765   3
   0   8  16 48.3047 9.40606   5
   0   8 -16 41.8275 11.8800   5
   0  -8 -16 74.6540 13.6123   1
   0   8 -16 45.1434 11.2829   1
   0   8 -16 44.4984 9.78618   3
   0   8 -17-1.41522 8.88937   5
   0   8 -17 3.21499 6.55199   3
   0  -8 -17-1.52524 9.06218   1
   0   8 -17 8.96885 8.88140   1
   0   8 -18 1838.22 71.8140   6
   0  -8 -18 1695.77 75.6089   2
   0   8 -18 1981.71 71.6901   5
   0   8 -18 1841.46 71.7142   1
   0  -8 -18 1921.09 72.9274   1
   0   8 -18 2058.64 66.1924   3
   0   8 -19 855.714 51.1333   2
   0  -8 -19 783.645 48.9341   2
   0   8 -19 963.984 46.5140   5
   0   8 -19 907.524 46.7723   1
   0  -8 -19 878.695 46.1588   1
   0   8 -19 892.950 46.0028   6
   0   8 -20 449.101 38.3872   2
   0  -8 -20 547.767 36.3646   1
   0   8 -20 510.336 35.0947   1
   0   8  21 565.704 31.9212   3
   0   8  22 44.2551 11.7107   3
   0   8  23 10.2915 8.89345   3
   0   9   0 0.47250 3.63486   6
   0   9  -1 218.792 12.7480   6
   0   9   1 207.296 11.1260   6
   0   9   2 2464.71 64.0624   6
   0   9  -2 2480.03 69.4309   6
   0   9  -3 4683.46 121.274   4
   0  -9  -3 4180.57 106.145   2
   0   9  -3 4319.43 106.346   2
   0   9  -3 4438.76 116.262   6
   0   9   3 4527.72 107.465   6
   0  -9  -3 4464.04 106.193   1
   0   9  -3 4623.95 106.021   1
   0  -9  -4 682.104 23.0491   2
   0   9  -4 667.592 22.5939   2
   0   9  -4 683.087 21.8217   1
   0  -9  -4 697.303 22.0328   1
   0   9  -4 661.110 27.8639   6
   0   9   4 669.831 19.0624   6
   0   9  -4 713.942 30.8022   4
   0   9  -5 3785.07 101.976   2
   0  -9  -5 4029.73 103.359   2
   0   9  -5 4024.02 100.836   1
   0  -9  -5 4076.10 101.077   1
   0   9  -5 3989.59 108.621   6
   0   9  -5 4078.05 111.557   4
   0  -9  -6 832.394 30.8060   2
   0   9  -6 775.664 33.8363   4
   0   9  -6 763.871 27.2642   1
   0  -9  -6 756.980 27.3917   1
   0   9  -6 743.995 31.9481   6
   0   9  -7 45.6733 9.08722   4
   0   9  -7 33.4565 6.17433   1
   0  -9  -7 34.0804 6.34827   1
   0   9  -7 32.7810 7.34886   3
   0   9  -7 43.0911 8.70334   6
   0   9  -8 253.137 18.1259   6
   0   9  -8 258.443 17.5053   3
   0  -9  -8 255.260 15.6339   1
   0   9  -8 249.601 15.5140   1
   0   9  -8 276.665 19.4812   4
   0   9  -9 342.050 21.7510   6
   0   9  -9 351.713 20.6474   3
   0   9  -9 330.957 18.9498   1
   0   9  -9 324.080 21.8732   4
   0   9 -10 1276.14 46.0916   3
   0   9 -10 1257.31 45.1780   1
   0   9 -10 1240.49 48.7183   6
   0   9  11 2489.41 72.5407   5
   0   9 -11 2588.92 80.4303   5
   0   9 -11 2542.40 77.8105   3
   0   9 -11 2612.94 78.7452   1
   0  -9 -11 2568.76 78.3624   1
   0   9 -11 2588.12 82.3361   6
   0   9  12 285.479 16.9257   5
   0   9 -12 272.511 20.6156   5
   0   9 -12 282.667 18.8792   3
   0   9 -12 253.263 18.8833   1
   0  -9 -12 264.690 19.5645   1
   0   9 -12 295.660 21.9547   6
   0   9  13 658.537 28.1653   5
   0   9 -13 628.606 32.9268   5
   0   9 -13 634.967 34.1593   6
   0   9 -13 653.930 30.7100   3
   0   9 -13 685.723 33.2267   1
   0  -9 -13 666.219 33.0626   1
   0   9 -14 11.3735 7.59828   3
   0   9 -14 1.23282 7.43273   1
   0  -9 -14 6.24953 7.53574   1
   0   9  14 3.37094 6.65272   5
   0   9 -14 6.38740 8.23356   5
   0   9 -14 8.17961 8.89547   6
   0   9 -15 18.0119 8.36462   3
   0  -9 -15 6.70411 7.85064   1
   0   9 -15 7.91010 9.11282   1
   0   9 -15-4.04157 9.61083   5
   0   9 -15 12.8417 9.86255   6
   0   9  15 8.87328 6.52258   5
   0   9  16 620.276 29.4269   5
   0   9 -16 671.360 36.1668   5
   0   9 -16 618.577 31.1649   3
   0   9 -16 593.326 34.4417   1
   0  -9 -16 624.254 34.9133   1
   0   9 -17 1012.35 46.6307   5
   0   9 -17 944.831 50.7388   2
   0  -9 -17 918.892 49.6928   2
   0   9 -17 1004.85 41.6486   3
   0  -9 -17 946.097 45.8189   1
   0   9 -17 940.335 45.6895   1
   0  -9 -18-3.20820 11.9080   1
   0   9 -18 23.7418 11.5265   1
   0   9 -18 26.7370 13.4264   2
   0  -9 -18 13.9939 11.8864   2
   0   9 -18 35.9956 9.97975   3
   0   9 -18 22.9502 11.1428   5
   0   9 -19 578.945 41.9738   2
   0  -9 -19 454.606 37.2097   2
   0  -9 -19 491.111 34.5747   1
   0   9 -19 617.675 37.9010   1
   0   9 -19 636.769 32.2088   3
   0   9 -20 9.15393 13.4047   2
   0  -9 -20 28.2554 15.3518   2
   0  -9 -20 26.5703 13.2727   1
   0   9 -20 24.5281 12.8829   1
   0   9  22 143.989 17.0412   3
   0   9  23 53.5579 12.2606   3
   0  10   0 9255.73 223.831   6
   0  10   1 1695.58 48.3435   6
   0  10  -1 1692.67 50.8038   6
   0  10   2 1679.10 45.9772   6
   0  10  -2 1599.45 50.7552   6
   0  10  -3 573.363 15.7216   1
   0  10  -3 645.861 29.1557   4
   0  10  -3 633.109 25.9764   6
   0  10   3 613.529 19.0991   6
   0 -10  -3 513.898 15.5046   2
   0  10  -3 546.374 15.9009   2
   0  10  -4 1625.56 53.8087   4
   0  10   4 1494.15 38.6323   6
   0  10  -4 1425.30 48.7653   6
   0  10  -4 1545.21 40.1004   1
   0 -10  -4 1484.60 40.1106   1
   0 -10  -4 1408.13 40.5720   2
   0  10  -4 1483.42 40.7617   2
   0 -10  -5 924.808 30.4631   2
   0  10  -5 908.420 29.7929   2
   0  10  -5 901.843 35.6415   6
   0  10  -5 976.786 38.9152   4
   0 -10  -5 894.651 28.7028   1
   0  10  -5 907.730 28.7970   1
   0  10  -6 5243.56 138.878   4
   0 -10  -6 4981.33 129.856   2
   0  10  -6 4980.61 128.393   2
   0  10  -6 5067.94 135.332   6
   0  10  -6 5001.07 126.532   1
   0 -10  -6 5086.61 126.723   1
   0  10  -7 234.503 17.5812   6
   0  10  -7 291.758 20.0703   4
   0  10  -7 258.771 16.1520   2
   0 -10  -7 270.124 17.2983   2
   0  10  -7 261.486 18.1549   3
   0 -10  -7 260.766 14.8390   1
   0  10  -7 260.034 14.5598   1
   0  10  -8 2305.72 73.4849   6
   0  10  -8 2480.12 76.4674   4
   0 -10  -8 2298.32 72.0228   2
   0  10  -8 2131.45 68.9617   2
   0  10  -8 2345.92 73.2257   3
   0  10  -8 2350.41 67.7529   1
   0 -10  -8 2363.45 67.8117   1
   0  10  -9 770.544 35.9408   6
   0 -10  -9 829.891 36.4406   2
   0  10  -9 809.102 37.2754   4
   0  10  -9 814.743 35.2901   3
   0  10  -9 818.683 32.3178   1
   0  10 -10 4.60452 6.74000   6
   0  10 -10 6.00522 5.94885   3
   0  10 -10 6.11855 5.98214   4
   0 -10 -10 12.9758 8.41538   2
   0  10 -10 8.66470 5.99027   1
   0 -10 -11 89.0645 14.1578   2
   0  10 -11 111.281 12.5638   1
   0  10 -11 98.2036 13.3199   6
   0  10  11 106.111 10.2489   5
   0  10 -11 90.5072 13.2967   4
   0  10 -11 102.297 12.4024   3
   0 -10 -11 81.9077 10.9405   1
   0  10 -12 445.537 27.1656   6
   0  10  12 387.944 20.3345   5
   0  10 -12 400.332 25.4650   5
   0 -10 -12 356.399 26.1303   2
   0  10 -12 437.045 27.6055   4
   0  10 -12 423.955 24.4273   3
   0 -10 -12 416.790 24.3244   1
   0  10 -12 400.399 23.8113   1
   0  10 -13 577.070 32.8710   6
   0 -10 -13 563.086 34.2376   2
   0  10 -13 668.089 33.9226   5
   0  10  13 601.379 26.6488   5
   0  10 -13 603.661 30.0080   3
   0 -10 -13 583.806 30.7587   1
   0  10 -13 581.238 30.9140   1
   0  10 -14 3924.64 118.139   6
   0  10  14 3824.86 106.422   5
   0  10 -14 4348.10 118.828   5
   0 -10 -14 3564.19 118.821   2
   0  10 -14 3631.10 118.190   2
   0  10 -14 4025.73 112.288   3
   0 -10 -14 3886.93 114.449   1
   0  10 -14 3884.12 114.641   1
   0  10 -15 77.1046 14.2310   5
   0  10  15 52.6634 9.43074   5
   0  10 -15 73.8328 14.1249   6
   0  10 -15 69.9850 13.2112   1
   0 -10 -15 69.0627 12.3583   1
   0  10 -15 75.7937 12.1400   3
   0 -10 -15 84.9726 16.5959   2
   0  10 -15 81.2236 15.5624   2
   0  10 -16 636.494 37.5628   6
   0  10  16 705.768 31.3952   5
   0  10 -16 799.585 39.7348   5
   0  10 -16 749.841 34.7706   3
   0 -10 -16 685.354 36.9608   1
   0  10 -16 640.857 36.3785   1
   0 -10 -16 697.567 41.3127   2
   0  10 -16 651.485 40.2741   2
   0  10 -17 273.724 23.9582   5
   0  10  17 264.132 19.2799   5
   0  10 -17 273.559 24.5654   1
   0 -10 -17 264.647 23.8799   1
   0  10 -17 286.252 21.4023   3
   0  10 -17 241.830 25.8336   2
   0 -10 -17 255.472 26.1181   2
   0  10 -18 13.3378 7.62000   3
   0  10 -18 2.00343 13.2319   2
   0 -10 -18 25.5374 13.4295   2
   0  10 -18 1.57891 10.6745   1
   0 -10 -18 4.77547 10.2612   1
   0  10 -18 26.8956 12.6957   5
   0  10 -19 93.4141 13.8914   3
   0  10 -19 68.3046 14.9932   1
   0 -10 -19 63.6323 15.4508   1
   0 -10 -19 81.8750 17.6567   2
   0  10 -19 61.0726 16.7090   2
   0  10 -20 107.644 15.4472   3
   0 -10 -20 120.910 18.7363   1
   0  10 -20 136.117 19.4080   1
   0  10 -20 137.657 22.5459   2
   0 -10 -20 76.1084 18.8354   2
   0  10  22 374.269 26.9004   3
   0  11   0 2.23565 4.02728   6
   0  11  -1 1676.72 51.5718   6
   0  11   1 1705.97 49.2107   6
   0  11  -2 759.991 30.1316   6
   0  11   2 791.489 26.0887   6
   0  11   3 606.623 20.4385   6
   0  11  -3 614.480 26.7751   6
   0  11  -4 315.507 11.9890   2
   0 -11  -4 341.537 12.0263   1
   0  11  -4 361.624 12.0583   1
   0  11  -4 354.431 22.4560   4
   0  11  -4 382.071 20.3391   6
   0  11   4 346.158 12.4504   6
   0 -11  -4 323.737 12.0658   2
   0  11  -5 628.844 30.8852   4
   0  11  -5 638.244 28.4085   6
   0 -11  -5 563.592 19.8844   1
   0  11  -5 605.396 20.0708   1
   0  11  -5 569.712 20.6612   2
   0 -11  -5 572.027 20.8892   2
   0  11  -6 1517.30 45.8279   2
   0 -11  -6 1566.03 46.8739   2
   0  11  -6 1465.50 52.0213   6
   0  11  -6 1547.18 55.8575   4
   0  11  -6 1509.57 44.1316   1
   0 -11  -6 1472.51 44.0128   1
   0  11  -7 651.321 30.6555   6
   0 -11  -7 665.851 27.5048   2
   0  11  -7 647.133 26.2432   2
   0  11  -7 614.851 31.6512   4
   0  11  -7 626.223 31.3334   3
   0 -11  -7 620.413 24.4615   1
   0  11  -7 602.668 24.0045   1
   0  11  -8 11.6434 7.16162   3
   0  11  -8 17.1230 7.40299   6
   0  11  -8 21.4129 8.22756   4
   0 -11  -8 13.4736 6.60802   2
   0  11  -8 9.49956 5.71297   2
   0 -11  -8 15.8069 5.70374   1
   0  11  -8 14.2943 5.30637   1
   0  11  -9 410.432 25.2184   6
   0  11  -9 435.659 23.4292   2
   0 -11  -9 436.830 24.7112   2
   0  11  -9 418.338 26.1966   4
   0  11  -9 426.179 24.6449   3
   0  11  -9 460.275 22.1626   1
   0  11 -10 30.3379 8.42263   3
   0  11 -10 15.3441 8.25521   4
   0  11 -10 16.6439 7.67744   6
   0  11 -10 18.6464 6.81827   1
   0  11 -10 24.8877 8.06238   2
   0 -11 -10 27.7983 9.07892   2
   0  11 -11 63.1431 11.0596   3
   0  11 -11 48.8670 11.3322   6
   0  11  11 42.8361 7.94951   5
   0  11 -11 46.8536 11.2220   4
   0  11 -11 47.1519 10.1435   2
   0 -11 -11 44.5329 11.0587   2
   0  11 -11 47.1588 9.08581   1
   0 -11 -11 58.7254 9.71710   1
   0  11 -12 1403.30 55.2266   6
   0  11 -12 1508.36 55.8204   5
   0  11  12 1420.83 46.4246   5
   0  11 -12 1293.21 53.2701   2
   0 -11 -12 1452.19 56.7673   2
   0  11 -12 1318.73 55.5313   4
   0  11 -12 1412.54 52.5595   3
   0  11 -12 1354.73 50.8771   1
   0 -11 -12 1453.19 51.7497   1
   0  11 -13 10.3628 7.60442   3
   0  11 -13 7.82978 8.72017   5
   0  11 -13 9.67129 9.85524   6
   0  11  13 2.29437 6.18653   5
   0  11 -13 2.98422 8.86607   4
   0  11 -13 5.54024 9.25530   2
   0 -11 -13 5.93987 9.32816   2
   0 -11 -13 5.65604 7.55933   1
   0  11 -13 2.26053 7.19324   1
   0  11 -14 1082.37 48.3135   6
   0  11 -14 1176.62 48.8884   5
   0  11  14 987.868 38.1689   5
   0 -11 -14 955.445 47.3959   2
   0  11 -14 992.811 47.0774   2
   0  11 -14 1101.66 49.9171   4
   0  11 -14 1071.84 44.0459   3
   0 -11 -14 1048.07 44.9492   1
   0  11 -14 1054.19 44.9235   1
   0  11 -15 164.027 19.1986   6
   0  11 -15 199.266 21.0875   4
   0  11 -15 147.763 16.3623   3
   0 -11 -15 145.813 19.9047   2
   0  11 -15 153.210 19.1806   2
   0  11 -15 175.614 18.5002   1
   0 -11 -15 170.945 18.3165   1
   0  11  15 171.408 14.8438   5
   0  11 -15 155.367 18.5066   5
   0  11 -16 93.9660 13.3363   3
   0  11  16 69.3676 10.7335   5
   0  11 -16 77.0435 14.9496   5
   0  11 -16 87.2977 15.2747   6
   0 -11 -16 71.5052 13.4426   1
   0  11 -16 67.2293 13.5797   1
   0 -11 -16 88.1819 16.9506   2
   0  11 -16 74.0600 15.5012   2
   0  11 -17 44.5803 10.7227   3
   0  11 -17 37.5569 12.5689   5
   0  11 -17 32.9052 12.6470   2
   0 -11 -17 20.2797 12.1883   2
   0  11  17 25.7290 8.65012   5
   0  11 -17 11.5056 11.1248   6
   0  11 -17 23.7972 11.0485   1
   0 -11 -17 13.3797 9.95046   1
   0 -11 -18 59.6844 14.8055   1
   0  11 -18 61.1641 14.4341   1
   0 -11 -18 49.9950 15.4760   2
   0  11 -18 40.5911 14.9198   2
   0  11 -18 54.3380 12.0722   3
   0 -11 -19-13.2062 14.5671   1
   0  11 -19 6.48828 8.96810   3
   0 -11 -19-11.9804 14.8120   2
   0  11 -19 4.07583 14.2360   2
   0  11 -20 553.242 32.6655   3
   0  11 -20 513.261 35.6842   1
   0 -11 -20 542.689 36.7347   1
   0 -11 -20 514.404 39.0609   2
   0  11 -20 521.524 39.8118   2
   0  12   0 725.570 27.6063   6
   0  12   1 837.191 29.1682   6
   0  12  -1 831.196 31.2933   6
   0  12   2 2042.48 55.2495   6
   0  12  -2 1871.90 59.5866   6
   0  12  -3 770.796 31.4805   6
   0  12   3 752.186 24.6835   6
   0  12  -4 1885.63 60.0287   6
   0  12   4 1851.07 48.5295   6
   0  12  -4 1844.86 64.6565   4
   0  12  -5 739.351 35.4333   4
   0  12  -5 776.629 32.7839   6
   0  12  -5 681.121 22.3054   2
   0 -12  -5 708.185 22.6918   2
   0  12  -5 741.215 22.1978   1
   0 -12  -5 713.258 22.1369   1
   0  12  -6 257.145 20.2701   4
   0  12  -6 282.086 19.3184   6
   0  12  -6 276.300 12.6843   1
   0 -12  -6 261.868 12.9434   1
   0  12  -6 271.547 13.5134   2
   0 -12  -6 297.270 14.3478   2
   0 -12  -7 350.928 18.2230   2
   0  12  -7 356.325 17.5832   2
   0  12  -7 336.461 22.1114   6
   0  12  -7 365.004 24.0875   4
   0  12  -7 290.492 21.5438   3
   0 -12  -7 338.597 16.4572   1
   0  12  -7 371.150 16.5550   1
   0 -12  -8 458.684 20.7902   1
   0  12  -8 449.315 26.2235   6
   0  12  -8 452.918 27.4288   4
   0 -12  -8 506.407 24.2348   2
   0  12  -8 469.860 22.3340   2
   0  12  -8 415.123 25.5897   3
   0  12  -8 448.674 20.4837   1
   0  12  -9 722.182 33.9159   6
   0  12  -9 678.476 34.5827   4
   0  12  -9 748.502 30.2155   2
   0 -12  -9 744.940 31.6746   2
   0  12  -9 678.853 32.6962   3
   0  12  -9 725.025 27.8760   1
   0  12 -10 1458.64 55.9961   6
   0  12 -10 1444.21 52.1495   2
   0 -12 -10 1554.06 55.3940   2
   0  12 -10 1512.51 58.5683   4
   0  12 -10 1527.64 55.7362   3
   0  12 -10 1484.71 50.1210   1
   0  12 -11 47.5933 10.8831   3
   0  12 -11 65.8230 12.4410   6
   0  12 -11 30.9038 11.0331   4
   0  12 -11 35.3208 9.18365   2
   0 -12 -11 36.1160 10.6572   2
   0  12 -11 42.8995 8.92014   1
   0 -12 -11 34.7504 8.38548   1
   0  12 -12 1547.30 59.9115   6
   0  12 -12 1660.50 60.4936   5
   0  12  12 1496.59 49.6124   5
   0  12 -12 1553.98 57.8157   2
   0 -12 -12 1528.74 59.4391   2
   0  12 -12 1643.71 62.7918   4
   0  12 -12 1521.21 57.1506   3
   0  12 -12 1634.27 55.9176   1
   0 -12 -12 1580.00 55.0597   1
   0  12 -13 442.218 29.3234   6
   0  12 -13 511.184 30.0172   5
   0  12  13 420.015 21.5440   5
   0 -12 -13 412.237 28.6050   2
   0  12 -13 388.023 26.9914   2
   0  12 -13 440.220 29.9437   4
   0  12 -13 442.622 27.2067   3
   0  12 -13 439.906 26.0290   1
   0 -12 -13 419.596 25.2352   1
   0  12 -14 118.416 15.0132   3
   0  12 -14 101.311 16.1579   4
   0  12  14 96.4119 11.2825   5
   0  12 -14 109.799 16.2227   5
   0  12 -14 96.6601 15.4241   6
   0 -12 -14 100.215 14.0755   1
   0  12 -14 116.205 15.0512   1
   0 -12 -14 125.753 17.2132   2
   0  12 -14 112.265 15.5063   2
   0  12 -15 70.6920 12.8357   3
   0  12  15 64.3066 10.2202   5
   0  12 -15 83.9358 15.1949   6
   0  12 -15 80.7217 14.6989   5
   0  12 -15 85.6896 15.5871   4
   0 -12 -15 69.0861 14.8907   2
   0  12 -15 61.8116 13.9998   2
   0 -12 -15 61.6231 12.7855   1
   0  12 -15 70.8950 12.7690   1
   0  12 -16 326.431 27.0342   6
   0  12  16 299.702 19.6761   5
   0  12 -16 383.662 28.4683   5
   0  12 -16 309.356 26.7963   2
   0 -12 -16 242.504 25.3415   2
   0  12 -16 322.019 27.3041   4
   0  12 -16 332.582 24.5252   3
   0 -12 -16 298.206 24.3201   1
   0  12 -16 301.377 24.1486   1
   0  12  17 350.201 21.7933   5
   0  12 -17 371.739 30.5735   2
   0 -12 -17 352.440 27.4806   1
   0  12 -17 388.572 28.4828   1
   0  12 -17 398.096 26.6835   3
   0  12 -18 887.644 50.1153   2
   0 -12 -18 933.501 50.6003   2
   0  12 -18 1099.50 46.3996   3
   0 -12 -18 1018.25 48.6309   1
   0  12 -18 966.631 47.8181   1
   0  12 -19 57.9278 12.5587   3
   0  12 -19 29.5560 14.6619   2
   0 -12 -19 47.1192 15.1473   2
   0 -12 -19 63.6496 15.7306   1
   0  12 -19 52.1838 14.1465   1
   0  12 -20 506.083 34.6128   1
   0 -12 -20 451.981 36.0460   2
   0  12 -20 423.275 35.1537   2
   0  13   0-1.89738 5.11527   6
   0  13   1 1003.10 33.8771   6
   0  13  -1 988.394 35.8436   6
   0  13  -2 510.126 24.2120   6
   0  13   2 529.187 20.6834   6
   0  13   3 17.7418 4.34729   6
   0  13  -3 20.1413 6.90706   6
   0 -13  -4 66.8634 12.1756   4
   0  13   4 69.9704 5.70212   6
   0  13  -4 56.9653 9.56368   6
   0  13  -5 74.5419 11.1020   6
   0  13  -5 82.8539 12.4406   4
   0  13  -5 68.4354 4.46528   2
   0  13  -6 376.001 25.4218   4
   0  13  -6 373.029 22.8846   6
   0  13  -6 361.199 14.3853   1
   0 -13  -6 376.041 14.6348   1
   0  13  -6 358.735 14.8363   2
   0 -13  -6 367.372 15.2649   2
   0 -13  -7 645.263 25.6358   2
   0  13  -7 643.977 24.7352   2
   0  13  -7 729.291 33.5662   6
   0  13  -7 757.407 36.9307   4
   0  13  -7 684.088 34.2306   3
   0 -13  -7 670.259 24.2480   1
   0  13  -7 702.565 24.3245   1
   0  13  -8 1615.10 50.0438   2
   0 -13  -8 1595.86 51.1597   2
   0  13  -8 1567.54 57.4758   6
   0  13  -8 1675.16 61.7679   4
   0  13  -8 1629.70 59.7847   3
   0 -13  -8 1546.43 47.8382   1
   0  13  -8 1580.48 47.7544   1
   0 -13  -9 1439.64 48.7507   2
   0  13  -9 1312.24 45.7599   2
   0  13  -9 1383.93 52.6021   6
   0  13  -9 1348.16 54.7459   4
   0  13  -9 1320.38 52.2504   3
   0 -13  -9 1312.24 43.5103   1
   0  13  -9 1314.03 43.5717   1
   0  13 -10 495.238 26.1556   2
   0 -13 -10 599.344 29.5191   2
   0  13 -10 504.185 29.9774   6
   0  13 -10 541.045 32.1750   4
   0  13 -10 537.349 30.3145   3
   0  13 -10 567.417 25.6349   1
   0 -13 -11 150.220 14.1502   1
   0  13 -11 158.966 17.6451   6
   0  13 -11 176.431 15.6320   2
   0 -13 -11 188.179 18.2668   2
   0  13 -11 186.599 19.8419   4
   0  13 -11 166.848 17.5009   3
   0  13 -11 167.714 14.4843   1
   0  13 -12 226.766 21.1210   6
   0  13  12 237.722 15.7866   5
   0  13 -12 274.141 22.3274   5
   0 -13 -12 270.950 22.3082   2
   0  13 -12 254.994 20.1472   2
   0  13 -12 266.656 23.4967   4
   0  13 -12 279.219 21.9325   3
   0  13 -12 262.805 18.9673   1
   0 -13 -12 277.316 18.9877   1
   0  13 -13 199.058 20.6005   6
   0  13  13 197.425 14.7377   5
   0  13 -13 221.581 20.5682   5
   0 -13 -13 216.698 21.1673   2
   0  13 -13 187.396 18.7138   2
   0  13 -13 216.769 21.9859   4
   0  13 -13 214.033 19.7173   3
   0  13 -13 204.149 17.6746   1
   0 -13 -13 193.579 17.5499   1
   0  13 -14 3.98460 8.12016   3
   0  13 -14 1.52986 9.08953   6
   0  13 -14 2.89806 8.98106   5
   0  13 -14-3.32013 10.2891   4
   0  13  14-1.56847 6.39273   5
   0 -13 -14-1.52271 10.5232   2
   0  13 -14 8.33200 8.12840   2
   0  13 -14 1.16308 8.21072   1
   0 -13 -14-1.16298 8.37926   1
   0  13 -15 243.189 23.2543   6
   0  13  15 234.793 17.1930   5
   0  13 -15 258.190 23.8008   5
   0  13 -15 249.666 23.0392   2
   0 -13 -15 245.205 24.1471   2
   0  13 -15 260.608 24.9514   4
   0  13 -15 243.118 21.6591   3
   0  13 -15 256.043 21.7599   1
   0 -13 -15 242.113 21.2556   1
   0 -13 -16 890.611 46.9582   2
   0  13 -16 909.368 46.0479   2
   0  13 -16 960.937 43.6661   3
   0  13  16 833.721 35.4526   5
   0  13 -16 1051.69 48.4081   5
   0  13 -16 963.730 43.8645   1
   0 -13 -16 884.296 42.6507   1
   0  13  17 49.4373 9.77291   5
   0  13 -17 45.8342 12.7007   1
   0 -13 -17 50.2439 13.0608   1
   0  13 -17 70.2554 13.6660   3
   0 -13 -17 53.3755 14.6692   2
   0  13 -17 66.2421 14.7383   2
   0  13 -18 228.321 24.5375   2
   0 -13 -18 217.391 24.3842   2
   0  13 -18 260.069 22.2970   3
   0  13 -18 236.470 23.5688   1
   0 -13 -18 215.776 22.3191   1
   0 -13 -19 140.806 19.6236   1
   0  13 -19 78.2549 17.2894   1
   0  13 -19 108.263 19.3570   2
   0 -13 -19 144.941 21.2056   2
   0  13 -19 142.405 17.6979   3
   0  13 -20 173.711 23.7977   2
   0 -14   0 1445.41 57.4760   4
   0  14   0 1548.28 48.2800   6
   0 -14  -1 954.020 43.9073   4
   0  14   1 1008.81 34.3637   6
   0  14  -1 1000.25 36.5314   6
   0 -14  -2 498.827 29.6328   4
   0  14  -2 493.260 24.0745   6
   0  14   2 490.162 20.1754   6
   0 -14  -3 526.984 30.5496   4
   0  14   3 515.690 19.6870   6
   0  14  -3 516.302 25.7708   6
   0 -14  -4 630.085 33.7261   4
   0  14   4 559.426 19.3152   6
   0  14  -4 610.894 28.7208   6
   0 -14  -5 1927.60 70.8704   4
   0  14  -5 2034.28 65.5719   6
   0  14  -6 626.325 34.0179   4
   0  14  -6 655.318 30.9573   6
   0  14  -6 592.635 18.2585   2
   0  14  -7 136.263 15.4463   6
   0  14  -7 137.084 16.8055   4
   0 -14  -7 163.996 10.5432   2
   0  14  -7 171.982 10.1655   2
   0  14  -7 171.698 17.4200   3
   0  14  -7 158.037 9.36030   1
   0 -14  -7 167.610 9.85466   1
   0  14  -8 592.778 31.1696   6
   0  14  -8 567.864 33.0659   4
   0  14  -8 565.014 22.9077   2
   0 -14  -8 546.506 23.6201   2
   0  14  -8 553.963 31.4313   3
   0 -14  -8 539.955 21.8239   1
   0  14  -8 549.896 21.7072   1
   0  14  -9 804.595 38.1740   6
   0  14  -9 776.029 39.9291   4
   0 -14  -9 793.661 31.8217   2
   0  14  -9 752.480 30.0525   2
   0  14  -9 777.529 38.0613   3
   0 -14  -9 737.545 28.6841   1
   0  14  -9 732.574 28.0789   1
   0  14 -10 130.996 16.0693   6
   0 -14 -10 147.406 14.8173   2
   0  14 -10 152.311 14.1739   2
   0  14 -10 130.214 17.3776   4
   0  14 -10 164.125 17.9699   3
   0  14 -10 143.881 12.4283   1
   0  14 -11 58.5051 12.2360   3
   0  14 -11 45.6725 12.8593   4
   0  14 -11 55.3625 12.2026   6
   0  14 -11 48.9891 8.75931   1
   0 -14 -11 53.7413 9.44195   1
   0  14 -11 69.3722 10.7198   2
   0 -14 -11 76.4314 12.4048   2
   0  14 -12 113.210 15.6297   3
   0  14 -12 105.169 15.2767   5
   0  14 -12 83.8699 14.4534   6
   0  14  12 72.1880 9.99979   5
   0  14 -12 98.0264 16.2594   4
   0  14 -12 85.2204 12.7487   2
   0 -14 -12 118.267 15.5929   2
   0  14 -12 99.6275 12.0916   1
   0 -14 -12 117.660 12.7290   1
   0  14 -13 553.507 34.3652   6
   0  14  13 543.386 25.1756   5
   0  14 -13 597.449 34.1936   5
   0  14 -13 554.183 30.8509   2
   0 -14 -13 635.087 34.4736   2
   0  14 -13 626.191 36.9242   4
   0  14 -13 553.040 32.8767   3
   0  14 -13 543.828 28.6653   1
   0 -14 -13 577.262 29.1795   1
   0  14 -14 581.085 36.1697   6
   0  14 -14 635.878 36.3132   5
   0  14  14 563.395 26.4673   5
   0  14 -14 673.142 35.0663   2
   0 -14 -14 662.320 36.7450   2
   0  14 -14 614.080 38.8205   4
   0  14 -14 633.253 35.4637   3
   0 -14 -14 624.683 31.7957   1
   0  14 -14 630.272 32.0249   1
   0  14  15 4.83777 6.72494   5
   0  14 -15 9.44056 10.3902   5
   0  14 -15 1.41563 9.56819   3
   0 -14 -15-4.71083 10.6134   2
   0  14 -15 7.21663 9.18438   2
   0 -14 -15-1.19596 10.4119   1
   0  14 -15-1.19173 9.56150   1
   0 -14 -16 211.756 23.0298   2
   0  14 -16 182.224 21.3895   2
   0  14 -16 232.088 21.8746   3
   0 -14 -16 182.640 19.3793   1
   0  14 -16 217.573 20.4447   1
   0  14  16 202.350 16.1154   5
   0  14 -17 5.79136 10.1139   3
   0 -14 -17-5.50018 11.5537   1
   0  14 -17-1.36430 9.82979   1
   0  14 -17 1.64424 10.3278   2
   0 -14 -17 6.93825 11.1781   2
   0  14 -18 37.6475 12.3513   3
   0 -14 -18 19.8360 13.5088   2
   0  14 -18 12.1305 12.6170   2
   0 -14 -18 5.84903 12.5616   1
   0 -14 -19 335.729 28.4453   1
   0 -14 -19 396.866 32.8639   2
   0 -15   0 14.4277 7.92023   4
   0  15   0 8.40614 5.39409   6
   0 -15  -1 543.811 32.3895   4
   0 -15   1 526.929 31.8999   4
   0  15   1 505.269 22.4368   6
   0  15  -1 530.280 24.7125   6
   0 -15  -2 502.734 30.8367   4
   0 -15   2 505.349 31.8312   4
   0  15  -2 532.382 25.4543   6
   0  15   2 501.470 21.1269   6
   0 -15  -3 1808.09 68.6614   4
   0  15   3 1885.63 52.3050   6
   0  15  -3 1869.13 60.8963   6
   0 -15  -4 48.7908 11.2205   4
   0  15  -4 42.5587 9.72833   6
   0  15  -5 906.990 38.3859   6
   0 -15  -5 847.243 42.8134   4
   0  15  -6 514.904 28.3481   6
   0 -15  -6 490.554 31.6005   4
   0  15  -7 767.254 35.9696   6
   0  15  -7 802.407 40.3353   4
   0  15  -7 793.300 38.9888   3
   0  15  -7 683.757 21.6936   2
   0 -15  -8 538.155 20.7757   1
   0  15  -8 570.813 20.8345   1
   0  15  -8 574.010 21.5868   2
   0  15  -8 603.378 35.0695   4
   0  15  -8 563.063 32.7188   3
   0 -15  -8 577.955 22.3872   2
   0  15  -9 1330.26 51.8988   6
   0  15  -9 1237.09 53.6739   4
   0 -15  -9 1256.30 41.4236   2
   0  15  -9 1242.67 40.0344   2
   0  15  -9 1264.22 52.5784   3
   0  15  -9 1157.55 38.1916   1
   0 -15  -9 1154.46 38.4163   1
   0  15 -10 485.626 30.4770   6
   0  15 -10 469.798 31.4518   4
   0  15 -10 527.113 24.1556   2
   0 -15 -10 469.183 24.3405   2
   0  15 -10 468.833 30.4706   3
   0  15 -10 481.203 22.0364   1
   0  15 -11 784.861 40.9611   6
   0  15 -11 865.784 34.9971   2
   0 -15 -11 866.047 36.7507   2
   0  15 -11 831.933 43.5863   4
   0  15 -11 896.709 42.8471   3
   0  15 -11 833.612 32.8388   1
   0  15 -12 693.760 38.1261   6
   0  15  12 660.686 27.4426   5
   0  15 -12 696.993 37.3608   5
   0 -15 -12 638.470 32.8021   2
   0  15 -12 673.042 31.7777   2
   0  15 -12 640.434 38.1878   4
   0  15 -12 679.755 37.0973   3
   0 -15 -12 627.096 29.1569   1
   0  15 -12 639.878 29.2339   1
   0  15 -13 255.555 23.9033   6
   0  15 -13 228.932 22.3301   5
   0  15  13 221.343 15.6927   5
   0  15 -13 240.059 19.8147   2
   0 -15 -13 212.983 20.1247   2
   0  15 -13 276.719 25.6864   4
   0  15 -13 221.096 21.8472   3
   0 -15 -13 218.667 17.6948   1
   0  15 -13 250.895 18.4699   1
   0  15 -14 188.873 18.5801   2
   0 -15 -14 174.630 19.4858   2
   0  15  14 196.191 14.9802   5
   0  15 -14 233.145 22.5066   5
   0  15 -14 173.455 19.8110   3
   0 -15 -14 166.392 16.6765   1
   0  15 -14 201.180 17.4521   1
   0  15 -15 312.894 25.7091   3
   0 -15 -15 297.140 22.3380   1
   0  15 -15 318.972 22.6538   1
   0  15 -15 298.545 23.7330   2
   0 -15 -15 300.297 25.2467   2
   0  15 -16 465.908 31.5336   3
   0 -15 -16 443.091 28.3187   1
   0 -15 -16 456.424 32.1486   2
   0  15 -16 460.713 30.4453   2
   0  15 -17 393.876 29.3665   3
   0 -15 -17 419.694 31.3944   2
   0 -15 -17 401.104 28.1434   1
   0 -15 -18 10.3156 12.1389   2
   0 -15 -18 8.38527 10.7532   1
   0 -15 -19 89.4554 18.5250   2
   0 -16   0 70.9341 13.2057   4
   0  16   0 48.2456 8.42139   6
   0 -16   1 976.967 46.9738   4
   0  16  -1 953.044 37.1211   6
   0  16   1 1005.63 35.2477   6
   0 -16  -2 15.4786 7.72874   4
   0 -16   2 21.9614 10.3603   4
   0  16  -2-0.88245 6.03456   6
   0  16   2 7.78485 5.25759   6
   0 -16  -3 536.245 33.0997   4
   0  16  -3 533.432 27.0046   6
   0  16   3 509.599 20.2997   6
   0 -16  -4 214.434 21.5381   4
   0  16  -4 260.491 19.2732   6
   0 -16  -5 495.279 32.8793   4
   0  16  -5 461.986 26.5949   6
   0  16  -6 45.5259 10.5553   6
   0 -16  -6 44.2098 12.7480   4
   0  16  -7 59.1902 12.1743   6
   0 -16  -7 68.6477 13.5925   4
   0  16  -7 33.1786 11.2492   3
   0  16  -8 3.13656 9.98116   4
   0  16  -8 9.19987 3.59970   2
   0  16  -8 4.54413 9.88435   3
   0  16  -8 9.08936 9.45050   6
   0  16  -9 1005.41 32.1778   1
   0  16  -9 1077.04 50.4345   4
   0  16  -9 1108.98 49.5258   3
   0  16  -9 1032.43 33.3634   2
   0 -16  -9 1051.30 34.3019   2
   0  16 -10 17.0247 10.2566   6
   0 -16 -10 36.0410 7.56491   2
   0  16 -10 39.9957 7.25339   2
   0  16 -10 43.5439 12.7567   4
   0  16 -10 27.3909 11.1051   3
   0  16 -10 37.8049 6.86658   1
   0 -16 -10 44.2764 6.95904   1
   0  16 -11 94.0106 15.5203   5
   0  16 -11 82.7572 15.2587   6
   0  16 -11 77.3068 10.3354   2
   0 -16 -11 76.9904 10.8999   2
   0  16 -11 94.2948 15.8435   4
   0  16 -11 92.0165 15.9792   3
   0  16 -11 91.6402 10.2470   1
   0  16 -12 42.8577 12.2807   5
   0  16 -12 23.0167 11.2912   6
   0  16 -12 31.8382 8.26101   2
   0 -16 -12 30.2496 9.43623   2
   0  16  12 22.6359 7.38894   5
   0  16 -12 29.4692 11.7364   3
   0 -16 -12 19.2703 7.25133   1
   0 -16 -13 83.7233 13.2026   2
   0  16 -13 102.294 16.2117   5
   0  16 -13 90.5045 15.7371   3
   0 -16 -13 111.847 12.9892   1
   0  16 -14 17.3172 10.8838   3
   0 -16 -14 10.8742 7.40821   1
   0 -16 -14 13.8379 8.97783   2
   0 -16 -15 284.274 23.3300   2
   0 -16 -15 248.321 20.1630   1
   0  16 -15 288.743 25.6119   3
   0 -16 -16 4.35109 10.2392   2
   0 -17   0 1.64090 9.30947   4
   0  17   0 3.75319 5.51587   6
   0 -17   1 620.916 36.8991   4
   0 -17  -1 556.325 35.0936   4
   0  17   1 586.926 25.0493   6
   0  17  -1 566.870 27.0292   6
   0 -17  -2 624.659 36.8298   4
   0  17  -2 620.687 29.4063   6
   0  17   2 645.590 25.2855   6
   0 -17  -3 878.510 45.5474   4
   0  17  -3 930.601 38.2018   6
   0 -17  -4 53.6506 13.1934   4
   0  17  -4 64.8375 11.8444   6
   0  17  -5 1070.42 44.4768   6
   0 -17  -5 1108.57 52.0277   4
   0  17  -6 305.775 22.9705   6
   0 -17  -6 330.086 27.8331   4
   0  17  -7 1105.84 51.7390   3
   0  17  -7 1154.31 48.3935   6
   0 -17  -7 1177.92 55.0517   4
   0  17  -8 297.812 25.4626   3
   0  17  -8 324.631 24.8065   6
   0 -17  -8 285.527 26.7326   4
   0  17  -9 444.329 31.3952   3
   0  17  -9 428.267 29.0577   6
   0  17  -9 397.788 30.4630   4
   0  17 -10 281.159 24.1272   6
   0  17 -10 292.054 25.4035   3
   0 -17 -10 240.067 13.7729   2
   0 -17 -11 392.557 19.4773   1
   0  17 -11 448.479 30.9170   6
   0  17 -11 447.551 31.7428   3
   0 -17 -11 414.588 21.2463   2
   0  17 -12 317.443 27.3265   3
   0  17 -12 363.738 27.1783   5
   0 -17 -12 320.280 20.2179   2
   0 -17 -13 433.708 23.8458   1
   0 -17 -13 438.737 25.3690   2
   0 -17 -14 89.0654 13.6906   2
   0 -18   0 64.6972 15.8509   4
   0  18   0 92.3528 11.0603   6
   0  18   1 101.315 10.9785   6
   0  18  -1 111.873 12.4900   6
   0 -18   1 77.4851 16.6067   4
   0 -18  -1 102.777 17.7222   4
   0 -18  -2 28.0580 12.6753   4
   0  18   2 44.1457 7.82787   6
   0  18  -2 54.4332 10.1257   6
   0  18  -3 196.676 17.5257   6
   0 -18  -3 197.622 22.8339   4
   0  18  -4 373.627 24.3594   6
   0 -18  -4 368.081 30.1863   4
   0  18  -5 704.769 35.4210   6
   0 -18  -5 742.469 42.7588   4
   0  18  -6 123.916 17.9713   3
   0 -18  -6 81.9191 17.5679   4
   0  18  -6 110.559 15.5876   6
   0  18  -7 72.9670 14.8860   3
   0 -18  -7 66.5366 17.6609   4
   0  18  -7 97.1068 15.1793   6
   0  18  -8 3.41138 9.03092   3
   0 -18  -8-11.2696 15.0696   4
   0  18  -8 4.14005 9.74214   6
   0  18  -9 294.848 24.9936   6
   0  18 -10 15.1068 10.4457   6
   0  18 -11 59.8083 14.6463   5
   0 -19   0-7.42154 13.8925   4
   0  19   0 3.12546 6.46808   6
   0  19  -1 715.556 31.3221   6
   0  19   1 708.641 28.9143   6
   0 -19  -1 624.211 40.6610   4
   0  19  -2 566.291 28.7664   6
   0 -19  -2 574.394 38.3348   4
   0 -19  -3 39.1991 14.8047   4
   0  19  -3 80.7865 12.3934   6
   0 -19  -4 77.0004 17.7724   4
   0  19  -4 103.773 14.0429   6
   0  19  -5 121.042 15.5498   6
   0  19  -6 184.896 19.5595   6
   0  19  -7 349.109 26.3430   6
   0  19  -8 284.996 24.5780   6
   0  19  -9 579.365 35.4289   6
   0  19 -10 192.077 20.7777   5
   0  20  -2 163.333 16.0136   6
   0  20  -3 37.9028 10.0440   6
   0  20  -4 249.551 20.6255   6
   0  20  -5 158.117 17.5938   6
   0  20  -6 137.151 17.6720   6
   0  20  -7 12.3009 10.5181   6
   0  20  -8 105.008 16.4324   6
  -1   0  25 36.1980 14.7639   3
   1   0 -24 12.0350 9.54183   6
  -1   0  23 308.546 25.9126   3
   1   0 -23 306.668 24.4249   6
  -1   0  22-12.2642 12.0253   3
   1   0 -22 2.52061 9.34953   6
   1   0 -21 3533.33 106.693   6
   1   0 -21 3404.81 129.398   2
  -1   0  21 3761.39 109.489   3
   1   0 -21 3421.54 119.055   1
  -1   0  20 16.0643 8.35260   3
   1   0 -20-2.34076 8.26279   6
   1   0 -20 2.49062 12.1712   2
   1   0 -20-1.92174 14.1207   1
   1   0 -19 1100.02 45.8095   6
   1   0 -19 1142.62 48.9943   5
   1   0 -19 1149.26 62.7583   2
  -1   0  19 1134.77 46.4735   3
   1   0 -19 1238.38 57.2038   1
   1   0 -18-5.35365 7.40039   6
   1   0 -18-4.92147 8.12544   5
  -1   0  18-4.42593 8.20860   3
   1   0 -18-4.57212 11.8779   2
   1   0 -18-3.51629 10.5989   1
   1   0 -17 251.636 19.0258   6
   1   0 -17 268.303 20.5868   5
   1   0 -17 277.079 29.1250   2
  -1   0  17 274.077 19.7008   3
   1   0 -17 283.681 25.2811   1
   1   0 -16 0.97913 6.31075   6
   1   0 -16 1.09188 7.38071   5
  -1   0  16 5.00400 5.29989   3
   1   0 -16 15.8136 10.0632   1
   1   0 -16 12.3993 12.0968   2
   1   0 -15 3764.27 106.858   5
   1   0 -15 3769.32 124.832   2
  -1   0  15 3711.95 104.783   3
   1   0 -15 3581.47 104.141   6
   1   0 -14-0.88344 5.17108   6
   1   0 -14-0.93787 5.96792   5
  -1   0  14 0.89344 4.90249   3
   1   0 -14-1.83450 10.5741   2
   1   0 -13 10034.9 268.229   2
  -1   0  13 9952.72 248.080   3
   1   0 -13 10098.9 249.177   5
   1   0 -13 9908.98 247.920   6
  -1   0  12 0.79138 4.26697   3
   1   0 -12 1.57656 7.86983   2
   1   0 -12 0.79881 5.21179   5
  -1   0  11 2933.79 83.7978   3
   1   0 -11 3075.11 98.8714   2
   1   0 -10 2.79269 4.32753   6
  -1   0  10-0.69460 4.06604   3
   1   0 -10 10.3496 7.22028   2
  -1   0   9 237.504 14.4234   3
   1   0  -9 215.220 18.3651   2
   1   0  -9 246.115 14.0812   5
  -1   0   8 1.80229 4.01411   3
   1   0  -8-3.03337 6.26692   2
   1   0  -7 14861.6 361.035   2
   1   0  -6 6.85305 5.37770   2
   1   0  -5 16909.5 402.671   2
  -1   0   4 2.00485 3.13835   3
   1   0  -4-0.52761 4.36759   2
  -1   0   3 1858.65 50.8604   3
   1   0  -3 1951.38 53.2161   2
  -1   0   2 2.37287 2.60028   3
   1   0  -2 1.52134 3.31146   2
  -1   0   1 1727.16 44.8679   3
  -1   0   0 0.37680 1.88092   3
  -1   0  -1 1686.88 41.8130   3
   1   0   2 4.01146 3.04295   1
   1   0   3 3098.36 79.9728   1
   1   0   4-0.97398 3.50882   1
   1   0   5 109.495 8.18027   6
   1   0   5 93.6893 8.69373   1
   1   0   6 3.58777 3.80238   5
   1   0   6 0.48682 3.29077   6
   1   0   6 4.55025 4.86754   1
   1   0   7 7669.88 187.807   5
   1   0   7 7840.75 187.344   6
   1   0   7 7451.08 177.499   3
   1   0   7 8132.81 192.330   1
   1   0   8 0.64405 3.99187   5
   1   0   8 1.12448 1.72942   3
   1   0   8 5.10844 4.83028   1
   1   0   8-1.20340 3.82885   6
   1   0   9 8995.82 220.830   6
   1   0   9 8813.93 210.646   3
   1   0   9 9264.67 227.595   1
   1   0   9 9170.28 221.926   5
   1   0  10-1.56691 5.04888   5
   1   0  10 2.20608 4.17189   6
   1   0  10 0.84087 2.01955   3
   1   0  11 702.074 29.5961   6
   1   0  11 668.469 21.8970   3
   1   0  11 677.679 29.9778   5
   1   0  12 0.87388 5.26912   6
  -1   0 -12 0.83578 4.74297   6
   1   0  12 7.27311 6.41904   5
   1   0  12 7.12989 2.53896   3
  -1   0 -12 3.75930 6.51163   1
   1   0  13 16.0938 7.16426   6
  -1   0 -13 16.1048 6.89368   6
   1   0  13 17.7317 7.58799   5
   1   0  13 19.0062 4.38470   3
  -1   0 -13 10.7323 7.97998   1
  -1   0 -14-4.27084 6.95679   1
   1   0  14-4.09465 7.66488   6
   1   0  14 6.56824 3.60929   3
   1   0  14-2.11027 6.96762   5
   1   0  15 3795.87 113.264   6
   1   0  15 4093.28 102.854   3
  -1   0 -15 3896.29 121.046   1
  -1   0 -16 6.37518 9.04196   1
   1   0  16-3.94709 5.35906   3
   1   0  16 5.85566 7.05975   6
   1   0  17 3770.99 97.2567   3
  -1   0 -17 3344.02 114.678   1
   1   0  18-1.93811 5.54670   3
  -1   0 -18 7.03290 10.8974   1
  -1   0 -19 110.432 17.5098   1
   1   0  19 125.162 11.7208   3
  -1   0 -20-1.92308 12.0795   1
   1   0  20 5.63215 5.82843   3
  -1   1  25-21.2455 17.5632   3
   1  -1 -25 2.63430 9.49152   6
  -1   1  24 827.886 42.0712   3
  -1  -1  24 808.499 41.5998   3
   1  -1 -24 768.629 39.3376   6
   1   1 -24 688.797 39.3449   6
  -1   1  23-11.4703 15.5987   3
   1  -1 -23 6.16430 9.14535   6
   1   1 -23 5.49856 9.18486   6
  -1   1  22 91.8074 15.6910   3
  -1  -1  22 89.3616 15.0721   3
   1   1 -22 109.104 15.7777   6
   1  -1 -22 83.3774 13.3526   6
   1  -1 -21 188.236 18.0414   6
   1   1 -21 225.123 20.5886   6
  -1  -1  21 242.160 20.5302   3
  -1   1  21 214.920 19.5692   3
   1   1 -21 161.418 26.2756   2
   1   1 -21 172.333 23.2122   1
   1   1 -20 378.280 25.6288   6
   1  -1 -20 349.452 23.4786   6
   1   1 -20 302.696 25.2810   5
   1   1 -20 357.669 35.0491   2
  -1   1  20 400.125 25.6015   3
  -1  -1  20 440.933 26.3458   3
   1   1 -20 376.353 31.7833   1
   1   1 -19 27.7452 10.5422   5
   1   1 -19 27.3404 10.4475   6
   1  -1 -19 30.6402 9.41647   6
  -1  -1  19 47.9114 9.55632   3
  -1   1  19 24.7923 8.95404   3
   1   1 -19 38.4923 13.3599   1
   1   1 -19 50.2334 16.9040   2
   1   1 -18 90.3585 13.7544   5
   1  -1 -18 76.0790 11.2969   6
   1   1 -18 59.5059 11.4269   6
  -1  -1  18 67.5665 11.3524   3
  -1   1  18 79.0383 12.2891   3
   1   1 -18 86.0618 16.1925   1
   1   1 -18 52.6862 16.7517   2
  -1   1  17 84.2036 11.9159   3
   1  -1 -17 83.9674 11.5537   6
   1   1 -17 98.9902 13.5498   6
   1   1 -17 78.1706 13.1504   5
   1  -1 -17 82.5985 13.0945   5
  -1  -1  17 91.2856 11.9287   3
   1   1 -17 88.3360 14.9393   1
   1   1 -17 95.9843 18.4379   2
   1   1 -16 1363.12 50.8211   6
   1  -1 -16 1332.68 48.1081   6
   1   1 -16 1387.49 51.4912   5
   1  -1 -16 1298.83 50.4383   5
   1   1 -16 1364.42 65.1778   2
  -1  -1  16 1352.89 49.3986   3
  -1   1  16 1306.81 48.9980   3
   1   1 -16 1418.21 58.5721   1
   1  -1 -15 32.6902 7.68622   6
   1   1 -15 25.0603 7.95471   6
  -1   1  15 40.8330 7.90403   3
  -1  -1  15 43.1081 7.91737   3
   1   1 -15 31.0405 12.3726   2
   1  -1 -15 41.3606 9.17891   5
   1   1 -15 37.1188 9.01432   5
   1  -1 -14 16.2867 6.26547   6
   1   1 -14 5.74048 6.08899   6
  -1   1  14 4.48987 5.17703   3
  -1  -1  14 0.88601 5.02766   3
   1   1 -14 16.3359 8.87045   2
   1   1 -14-1.92369 5.79912   5
   1  -1 -14 0.92082 6.00876   5
   1   1 -13 57.9340 9.41551   6
   1   1 -13 33.1380 7.75587   5
   1  -1 -13 46.9939 8.30786   5
  -1  -1  13 46.9621 8.12452   3
  -1   1  13 42.5134 7.81485   3
   1   1 -13 40.3993 12.0489   2
   1   1 -12 108.779 15.5684   2
  -1   1  12 78.6170 9.68098   3
  -1  -1  12 85.1955 9.57758   3
   1   1 -12 94.4745 10.4997   5
   1   1 -12 93.5282 10.6536   6
   1  -1 -11 84.1592 8.87476   6
  -1   1  11 70.9235 9.00570   3
  -1  -1  11 95.3561 9.68574   3
   1   1 -11 89.3464 13.7668   2
   1   1 -10 5365.92 146.284   2
  -1  -1  10 5333.85 133.751   3
   1  -1 -10 5460.36 132.370   5
   1  -1 -10 5112.80 131.709   6
   1  -1  -9 53.0603 6.87359   5
  -1  -1   9 51.6645 7.14070   3
  -1   1   9 53.6952 7.29851   3
   1   1  -9 42.0714 9.19144   2
   1  -1  -9 34.9439 9.63418   2
  -1  -1   8 327.639 17.0937   3
   1  -1  -8 334.376 21.7847   2
   1  -1  -8 368.358 16.4656   5
   1  -1  -7 37.3298 7.98234   2
   1   1  -7 28.7558 7.51909   2
   1   1  -6 6186.24 149.713   2
   1   1  -6 5941.43 143.316   3
   1  -1  -5 2.55897 4.17673   2
   1   1  -5 8.21720 4.69135   2
   1   1  -5 8.53778 3.36809   3
   1   1  -4 4364.82 105.827   2
  -1  -1   4 4226.19 102.794   3
   1  -1  -3 410.272 17.6135   2
   1   1  -3 464.842 18.3043   2
  -1  -1   3 473.916 17.1183   3
  -1  -1   2 18060.4 422.853   3
   1  -1  -2 17161.7 424.115   2
  -1  -1   1 2026.66 52.2525   3
   1  -1   0 337.311 10.8602   4
  -1  -1   0 357.429 12.1903   3
  -1  -1  -1 66.5470 4.13384   3
   1   1   2 3950.32 91.5549   1
   1  -1   2 3314.93 90.3262   1
   1   1   3 902.434 22.7432   3
   1   1   3 981.489 29.5055   1
   1  -1   4 3019.68 74.5655   6
   1   1   4 3015.40 76.0038   1
   1   1   5 397.529 15.9384   6
   1  -1   5 365.974 16.5036   6
   1   1   5 374.155 17.8595   1
   1  -1   5 371.641 16.5522   5
   1  -1   6 5476.47 137.770   6
   1   1   6 5470.39 135.980   6
   1   1   6 5418.95 140.584   1
   1  -1   6 5590.14 137.927   5
   1   1   7 2020.83 57.8230   6
   1  -1   7 2050.37 59.4909   6
   1   1   7 2094.73 62.7677   1
   1   1   7 2053.88 59.4232   5
   1  -1   7 2070.35 59.6816   5
   1   1   8 369.768 20.4189   1
   1  -1   8 344.611 17.9328   6
   1   1   8 362.610 17.2192   6
   1  -1   8 344.669 11.8287   3
   1   1   8 335.362 12.0492   3
   1   1   8 346.230 17.8267   5
   1  -1   8 377.905 18.7575   5
   1  -1   9 190.265 13.5934   6
   1   1   9 220.982 13.6526   6
   1  -1   9 203.641 14.3038   5
   1   1   9 211.584 14.4231   5
   1   1   9 191.379 8.77699   3
   1  -1   9 199.491 8.90072   3
   1   1   9 217.595 16.3413   1
   1  -1  10 60.5207 8.41276   5
   1  -1  10 47.9385 8.06133   6
   1   1  10 55.5289 8.03083   5
   1   1  10 49.6176 4.65506   3
   1  -1  10 52.8529 4.78489   3
   1   1  10 64.9588 7.94694   6
   1   1  11 20.9576 6.73449   5
  -1   1 -11 12.6571 6.43077   1
   1  -1  11 16.1005 3.31362   3
   1   1  11 11.3667 3.45724   3
   1  -1  11 16.2676 6.30024   5
   1  -1  11 14.6323 6.39395   6
   1   1  11 17.9661 6.20613   6
   1   1  12 1011.46 39.6891   5
   1  -1  12 979.978 39.6894   5
   1  -1  12 1032.19 31.2033   3
   1   1  12 997.720 30.9198   3
  -1   1 -12 1100.73 45.2073   1
  -1   1 -12 1006.72 39.1651   6
   1  -1  12 1061.11 40.5395   6
   1   1  12 985.643 37.9416   6
   1  -1  13 959.351 40.1594   5
   1   1  13 1018.96 40.7118   5
   1   1  13 1020.67 32.0108   3
   1  -1  13 1034.88 32.2226   3
  -1   1 -13 1009.73 45.0261   1
  -1   1 -13 1031.90 40.5536   6
   1  -1  13 1037.30 41.3023   6
   1   1  13 1015.63 39.5685   6
   1   1  14 539.851 28.2702   5
   1   1  14 558.087 21.2386   3
   1  -1  14 549.655 21.2079   3
  -1   1 -14 525.549 31.9123   1
   1   1  14 544.482 27.6830   6
   1  -1  14 598.186 30.1377   6
  -1   1 -14 534.074 27.9865   6
   1   1  15 1128.47 46.5613   5
  -1   1 -15 1245.81 48.0106   6
   1   1  15 1202.95 46.9278   6
   1  -1  15 1280.23 49.1231   6
   1  -1  15 1282.44 39.2343   3
   1   1  15 1235.04 39.0075   3
  -1   1 -15 1148.71 52.2301   1
  -1   1 -16 90.9401 14.9856   1
   1  -1  16 71.4154 12.7105   6
   1   1  16 78.4419 12.3335   6
   1   1  16 71.8122 8.35094   3
   1  -1  16 67.2723 8.07993   3
  -1   1 -16 53.8459 10.9021   6
  -1   1 -17 586.940 37.0532   1
   1  -1  17 652.833 25.8553   3
   1   1  17 676.108 26.2324   3
  -1   1 -18 196.946 22.2812   1
   1  -1  18 181.547 13.1610   3
   1   1  18 228.818 14.5991   3
   1  -1  19 923.592 33.2856   3
   1   1  19 884.578 33.1010   3
  -1   1 -20 795.505 47.5588   1
   1   1  20 969.255 34.9800   3
   1   1  21 924.349 34.8298   3
   1   1  22 66.3067 9.88271   3
  -1  -2  25 769.651 42.4953   3
  -1   2  25 762.916 41.8845   3
   1  -2 -24 47.4698 12.5704   6
  -1  -2  24 42.2667 13.6521   3
  -1   2  24 49.1090 14.3443   3
  -1   2  23 529.333 32.4183   3
  -1  -2  23 484.785 31.8287   3
   1   2 -23 405.639 30.0660   6
   1  -2 -23 466.445 28.8523   6
  -1  -2  22 71.3177 14.0925   3
  -1   2  22 65.9543 13.9006   3
   1  -2 -22 93.5701 13.3635   6
   1   2 -22 74.3543 14.2598   6
   1   2 -21 46.4171 11.9840   6
   1  -2 -21 18.4186 9.12670   6
  -1  -2  21 48.8923 11.1432   3
  -1   2  21 34.1802 10.9837   3
   1   2 -21 18.2585 15.0485   2
   1   2 -21 19.8885 14.7675   1
   1   2 -21 11.9112 10.9593   5
   1   2 -20 74.9116 14.0519   6
   1  -2 -20 77.8355 12.5291   6
   1   2 -20 84.8098 15.4333   5
  -1   2  20 84.7132 14.0704   3
  -1  -2  20 99.2976 13.1260   3
   1   2 -20 82.6375 19.6954   2
   1   2 -20 91.6469 18.4563   1
   1  -2 -19 853.875 36.3838   6
   1   2 -19 812.471 39.2541   6
   1   2 -19 810.723 40.7023   5
   1   2 -19 862.368 53.0422   2
  -1  -2  19 845.777 38.2248   3
  -1   2  19 783.441 37.8007   3
   1   2 -19 860.338 46.3035   1
   1  -2 -18 99.7076 12.1134   6
   1   2 -18 85.3984 13.5498   6
   1   2 -18 97.2635 15.0136   5
  -1   2  18 86.2985 13.0516   3
  -1  -2  18 104.986 13.3440   3
   1   2 -18 89.0210 15.7456   1
   1   2 -18 63.5528 16.6473   2
   1  -2 -17 2986.16 90.0088   6
   1   2 -17 3067.83 95.3834   6
   1   2 -17 3084.95 112.614   2
   1   2 -17 3148.09 96.3347   5
  -1   2  17 3335.94 95.4416   3
  -1  -2  17 3190.05 94.0620   3
   1   2 -17 3118.67 103.786   1
   1  -2 -16 336.550 19.7376   6
   1   2 -16 353.198 22.8502   6
   1   2 -16 347.460 30.6794   2
   1   2 -16 321.699 22.0971   5
  -1   2  16 272.242 19.5733   3
  -1  -2  16 303.111 20.3064   3
   1   2 -16 350.362 26.6455   1
   1   2 -15 252.951 18.7199   5
   1  -2 -15 247.542 17.8028   5
   1   2 -15 230.648 23.8216   2
  -1   2  15 254.811 18.1660   3
  -1  -2  15 284.225 18.5270   3
   1   2 -15 208.451 17.5560   6
   1  -2 -15 243.310 16.4655   6
   1   2 -14 1.02173 5.98110   6
   1   2 -14 1.98220 6.05974   5
   1  -2 -14 0.87767 5.65657   5
  -1  -2  14 9.88374 6.00411   3
  -1   2  14 2.75731 5.61962   3
   1   2 -14 5.32258 8.85670   2
   1   2 -13 401.396 29.9421   2
  -1   2  13 365.149 21.3907   3
  -1  -2  13 416.356 22.1724   3
   1  -2 -13 379.861 21.0980   5
   1   2 -13 385.412 21.8950   5
   1   2 -13 415.920 23.1391   6
  -1   2  12 0.82395 4.75013   3
  -1  -2  12 3.21709 4.98572   3
   1   2 -12 13.7168 8.21802   2
   1   2 -12 3.38216 5.31179   5
   1  -2 -12 4.55977 3.63660   6
   1   2 -12 4.59743 5.54356   6
   1  -2 -11 2851.61 79.3753   6
   1   2 -11 2952.64 94.8019   2
  -1  -2  11 2888.67 82.4374   3
  -1   2  11 2899.32 82.8465   3
   1   2 -10 288.168 21.5010   2
   1  -2 -10 240.674 13.9519   6
  -1  -2  10 260.453 15.8574   3
   1  -2 -10 261.990 14.7633   5
   1  -2  -9 12846.9 303.000   5
   1  -2  -9 12281.3 302.481   6
   1   2  -9 12844.1 316.596   2
  -1  -2   9 12845.3 306.023   3
   1   2  -9 12776.3 305.727   3
   1  -2  -8 26.0174 5.21994   5
   1   2  -8 14.6111 4.53912   3
  -1  -2   8 21.1620 5.24970   3
   1   2  -8 19.7459 6.68866   2
   1   2  -7 856.755 30.5546   3
   1   2  -7 917.217 35.7002   2
   1  -2  -7 869.295 27.8588   5
   1   2  -6 81.4011 7.65680   3
   1   2  -6 88.6929 9.83761   2
   1  -2  -6 89.1394 6.48836   5
   1   2  -5 54.3445 6.25998   3
  -1   2   5 52.7415 7.46846   2
   1   2  -5 60.5994 7.45127   2
  -1   2   4 2637.56 72.2555   2
   1   2  -4 2613.88 71.3137   2
  -1  -2   4 2619.41 69.5938   3
  -1   2   3 10203.3 248.698   2
   1   2  -3 10678.2 248.452   2
  -1  -2   3 10332.1 247.361   3
  -1   2   2 8.14918 3.54873   2
   1   2  -2 9.67706 3.54545   2
  -1  -2   2 13.2182 3.35231   3
   1   2  -1 7963.60 187.506   4
  -1   2   1 8202.80 191.186   2
  -1  -2   1 8014.00 190.938   3
  -1  -2   0 414.955 14.4532   3
   1  -2   0 414.341 14.1654   4
   1  -2   1 270.380 10.8629   4
  -1   2  -2 454.239 17.5453   1
   1   2   2 479.182 17.6543   1
   1  -2   3 1379.56 40.4220   6
  -1   2  -3 1442.13 41.3672   1
   1   2   3 1370.00 40.5553   1
   1  -2   4 2983.78 79.2850   6
   1   2   4 3047.62 79.9437   1
  -1   2  -4 3011.96 79.6944   1
   1  -2   5 17972.0 417.803   6
  -1   2  -5 17595.1 409.254   3
   1   2   5 17823.1 418.910   1
  -1   2  -5 17737.1 419.015   1
  -1   2  -6 553.011 16.6968   3
  -1   2  -6 570.767 24.6194   1
   1   2   6 583.128 24.6136   1
   1   2   6 583.859 21.0083   6
   1  -2   6 562.914 22.9776   6
   1  -2   7 488.849 21.6989   5
   1   2   7 512.973 20.0193   6
   1  -2   7 524.255 22.4719   6
  -1   2  -7 483.327 15.4170   3
  -1   2  -7 489.768 23.8545   1
   1   2   7 497.628 23.7506   1
   1  -2   8 3.47900 4.59634   6
   1   2   8 7.27440 3.92835   6
   1  -2   8 4.62694 4.26141   5
  -1   2  -8 4.25571 5.48642   1
   1   2   8 7.66530 5.62552   1
  -1   2  -8 5.31783 2.32352   3
   1   2   9 40.5795 7.12717   5
  -1   2  -9 27.4805 7.75557   1
   1   2   9 23.8503 7.30747   1
   1  -2   9 37.4289 6.84810   5
   1   2   9 26.9450 5.27082   6
   1  -2   9 27.4979 6.77595   6
  -1   2 -10 2180.16 71.1131   1
   1   2  10 2163.47 63.3343   6
   1  -2  10 2260.30 67.8882   6
   1  -2  10 2207.10 66.6516   5
   1   2  10 2123.99 65.8335   5
   1  -2  11 6594.04 168.251   6
  -1   2 -11 6467.75 167.254   6
   1   2  11 6470.26 163.216   6
   1   2  11 6278.30 155.916   3
   1   2  11 6323.81 165.995   5
   1  -2  11 6607.74 167.247   5
  -1   2 -11 6556.09 172.775   1
   1   2  12 1061.57 40.8404   5
   1   2  12 1087.89 33.0837   3
  -1   2 -12 1070.99 45.4899   1
   1  -2  12 1093.28 42.5943   6
  -1   2 -12 1065.43 41.4168   6
   1   2  12 1016.43 38.3706   6
   1   2  13 4924.06 133.400   5
   1   2  13 4908.40 122.574   3
  -1   2 -13 4730.16 139.299   1
   1  -2  13 5256.59 136.733   6
   1   2  13 4739.09 130.184   6
  -1   2 -13 4863.51 134.104   6
   1   2  14 324.154 21.4059   5
   1   2  14 324.233 20.2623   6
   1  -2  14 372.462 23.6624   6
  -1   2 -14 371.377 22.7832   6
   1   2  14 323.760 15.7433   3
  -1   2 -14 321.986 24.3049   1
  -1   2 -15 138.994 17.2075   1
   1   2  15 179.161 11.5317   3
   1   2  15 173.705 15.7622   5
   1   2  15 165.761 15.1554   6
   1  -2  15 178.218 17.0997   6
  -1   2 -15 185.847 16.9164   6
   1   2  16 336.942 23.2931   5
   1   2  16 321.529 21.4696   6
  -1   2 -16 308.175 22.6817   6
   1  -2  16 330.447 24.0066   6
   1   2  16 357.075 17.3023   3
  -1   2 -16 329.329 26.2367   1
  -1   2 -17 85.1827 15.8076   1
   1   2  17 85.9033 9.72472   3
  -1   2 -17 79.1083 13.1085   6
  -1   2 -18 59.7899 15.6958   1
  -1   2 -18 59.2866 12.7568   6
   1   2  18 73.7650 9.59957   3
   1   2  19 3297.80 87.8726   3
  -1   2 -19 2779.17 103.815   1
   1   2  20 12.1236 6.69387   3
  -1   2 -20 19.1949 11.9011   1
   1   2  21 728.075 30.3650   3
   1   2  22 88.0353 11.1714   3
  -1  -3  25 69.7345 18.0665   3
  -1   3  25 110.143 17.6877   3
   1  -3 -24 89.2654 14.4870   6
  -1   3  24 99.5410 16.3097   3
  -1  -3  24 98.9213 17.2253   3
  -1  -3  23 253.780 23.9033   3
  -1   3  23 300.549 24.7056   3
   1  -3 -23 250.472 21.3068   6
  -1  -3  22 439.645 29.1355   3
  -1   3  22 412.742 28.4803   3
   1   3 -22 450.261 30.6838   6
   1  -3 -22 419.417 25.9076   6
   1   3 -21 48.8712 13.4741   6
   1  -3 -21 49.9831 10.7646   6
   1   3 -21 45.0281 13.2961   5
  -1   3  21 51.9835 12.2037   3
  -1  -3  21 72.3174 13.4053   3
   1   3 -21 53.2742 15.3559   1
   1  -3 -21 55.7611 18.4804   2
   1   3 -21 41.4214 16.5148   2
   1  -3 -21 35.3207 16.1621   1
   1   3 -20 2207.28 76.6246   6
   1  -3 -20 2087.16 69.2862   6
   1   3 -20 2158.71 77.1408   5
   1  -3 -20 2052.82 89.8547   2
   1   3 -20 2147.80 92.4671   2
  -1  -3  20 2208.62 73.8221   3
  -1   3  20 2234.17 74.6925   3
   1   3 -20 2103.05 82.8616   1
   1  -3 -20 2172.27 83.8641   1
   1   3 -19 1.36645 8.80622   5
  -1   3  19 1.20518 7.26537   3
  -1  -3  19 4.69248 7.36894   3
   1   3 -19 1.33617 8.82367   6
   1  -3 -19 2.78088 6.33645   6
   1   3 -19 2.35236 11.4954   2
   1   3 -19 12.6889 12.2521   1
   1  -3 -19 9.05616 10.6021   1
   1  -3 -19-2.34800 12.8841   2
   1  -3 -18 146.951 13.6878   6
   1   3 -18 134.219 16.4437   6
   1   3 -18 132.845 16.6426   5
  -1  -3  18 164.980 16.2044   3
  -1   3  18 144.742 15.4415   3
   1   3 -18 153.907 23.3036   2
   1  -3 -18 179.704 21.3141   1
   1   3 -18 140.179 19.7577   1
   1  -3 -18 107.865 20.7471   2
   1   3 -17 165.362 17.1502   5
   1  -3 -17 168.153 14.0621   6
   1   3 -17 153.493 16.9369   6
  -1   3  17 156.724 15.8565   3
  -1  -3  17 150.728 14.9598   3
   1   3 -17 134.763 21.8672   2
   1  -3 -17 171.357 20.4033   1
   1   3 -17 166.436 19.9164   1
   1  -3 -17 156.131 22.6255   2
   1   3 -16 534.686 29.0557   5
   1  -3 -16 504.030 24.2763   6
   1   3 -16 490.540 28.3624   6
   1   3 -16 546.520 37.8113   2
   1  -3 -16 493.498 36.2145   2
  -1   3  16 478.808 26.6054   3
  -1  -3  16 501.876 26.9049   3
   1   3 -16 518.183 32.5905   1
   1  -3 -16 505.432 32.3812   1
   1   3 -15 1071.53 43.6928   5
   1   3 -15 1105.35 44.6701   6
   1   3 -15 1046.49 53.6993   2
  -1  -3  15 1063.98 41.8302   3
  -1   3  15 1081.03 42.5497   3
   1   3 -14 3788.78 108.357   5
   1   3 -14 3994.89 110.835   6
   1   3 -14 3873.52 123.075   2
  -1  -3  14 3715.86 106.343   3
  -1   3  14 3700.43 107.166   3
  -1  -3  13 13.8818 6.44376   3
  -1   3  13 13.4745 6.41504   3
   1   3 -13 17.7908 10.4275   2
   1   3 -13 10.2887 6.38481   6
   1  -3 -13 15.6719 4.99886   6
   1   3 -13 13.1979 7.13078   5
   1  -3 -12 2983.04 80.9110   6
   1   3 -12 3084.18 88.8377   6
   1   3 -12 2958.90 97.6799   2
   1   3 -12 2844.81 85.5540   5
  -1  -3  12 3014.83 86.1810   3
   1   3 -12 2969.72 85.2120   3
   1  -3 -11 563.933 22.7012   6
   1   3 -11 614.708 28.3263   6
   1  -3 -11 601.747 24.5873   5
   1   3 -11 540.662 25.4016   3
  -1  -3  11 568.695 25.9828   3
   1   3 -11 576.556 32.9282   2
   1  -3 -10 35.5147 5.55025   6
   1   3 -10 25.7714 9.13042   2
   1   3 -10 26.0124 6.15587   3
  -1  -3  10 31.0880 6.56922   3
   1  -3 -10 30.9685 5.67834   5
   1  -3  -9 10.3401 3.97305   6
   1  -3  -9 11.1613 4.14265   5
   1   3  -9 5.44130 4.49667   3
  -1  -3   9 8.37910 4.44849   3
   1   3  -9 14.2984 7.00216   2
  -1  -3   8 2294.61 66.9266   3
   1   3  -8 2382.98 66.8506   3
   1  -3  -8 2303.59 62.4797   5
   1   3  -8 2331.26 73.2658   2
   1   3  -7 89.2654 8.45535   3
   1  -3  -7 91.7745 6.96328   5
   1   3  -7 106.109 11.5759   2
   1   3  -6 11845.1 289.703   3
   1  -3  -6 12114.8 283.704   5
   1   3  -6 12443.2 294.630   2
   1   3  -5 403.560 17.5452   3
   1  -3  -5 375.277 12.9765   5
   1   3  -5 425.227 19.5109   2
  -1  -3   4 3038.90 83.8787   3
   1  -3  -4 3249.01 77.1214   5
  -1   3   4 3290.17 86.4767   2
   1   3  -4 3303.66 85.4661   2
   1   3  -3 959.716 30.9770   2
  -1   3   3 1011.34 32.0006   2
  -1  -3   3 967.913 30.8721   3
  -1   3   2 325.663 13.8785   2
  -1  -3   2 334.891 14.3086   3
   1   3  -2 307.733 13.5494   2
   1   3  -1 267.117 10.3881   4
  -1   3   1 274.569 11.7056   2
   1  -3   0 7140.54 169.199   5
   1  -3   0 7502.81 173.788   4
   1   3   1 5822.71 141.750   1
   1  -3   1 5883.54 141.995   4
   1   3   2 38645.8 891.672   1
  -1   3  -2 38469.8 891.941   1
  -1   3  -3 7525.92 180.670   5
  -1   3  -3 7562.92 182.682   1
   1   3   3 7536.02 182.229   1
   1  -3   4 31.8067 5.59811   6
   1   3   4 32.3457 5.28606   1
  -1   3  -4 31.6214 5.58805   1
  -1   3  -4 29.7467 4.65321   5
  -1   3  -5 17.5647 4.46109   5
  -1   3  -5 16.3335 5.01593   1
   1   3   5 18.0082 5.01177   1
   1  -3   5 11.5327 4.38513   6
  -1   3  -6 444.155 19.5523   5
   1  -3   6 449.793 20.3560   6
  -1   3  -6 437.243 20.9109   1
  -1   3  -6 436.845 14.9851   3
   1   3   6 424.524 20.5893   1
   1  -3   7 496.678 23.0517   6
   1   3   7 546.403 20.1726   6
  -1   3  -7 515.977 17.4132   3
  -1   3  -7 515.852 24.7155   1
   1   3   7 521.301 24.4977   1
  -1   3  -7 537.799 22.9226   5
   1   3   8 6777.51 165.416   6
   1  -3   8 6793.48 171.343   6
  -1   3  -8 6755.82 173.518   1
   1   3   8 6850.83 174.159   1
  -1   3  -8 6645.79 161.223   3
   1  -3   9 767.456 30.9085   6
   1   3   9 648.250 25.1274   6
  -1   3  -9 671.514 22.1422   3
   1   3   9 743.739 32.5358   1
  -1   3  -9 665.835 30.8545   1
   1  -3  10 5464.53 142.673   6
   1   3  10 5323.39 135.685   6
  -1   3 -10 5236.45 130.240   3
  -1   3 -10 5601.96 145.653   1
   1   3  10 5322.07 139.465   5
   1   3  11 1379.07 45.1407   6
   1  -3  11 1428.24 51.0519   6
   1   3  11 1414.92 48.5763   5
  -1   3 -11 1438.58 53.0349   1
  -1   3 -11 1419.46 40.4612   3
  -1   3 -12 94.5275 13.5513   1
   1   3  12 88.2176 11.2069   5
   1  -3  12 134.951 13.8411   6
  -1   3 -12 99.2642 12.1842   6
   1   3  12 94.4835 10.0035   6
   1   3  13 29.6082 8.17125   5
  -1   3 -13 37.7081 10.5386   1
  -1   3 -13 22.1177 7.76920   6
   1   3  13 27.8379 6.94803   6
   1  -3  13 39.6490 9.25980   6
   1   3  14 719.372 33.2354   5
   1   3  14 765.778 31.6251   6
  -1   3 -14 706.077 34.4007   6
   1  -3  14 735.040 35.5402   6
   1   3  14 716.864 26.7825   3
  -1   3 -14 721.082 37.4775   1
  -1  -3 -14 717.736 37.5898   1
  -1   3 -15-4.42304 8.88851   1
  -1  -3 -15 8.95466 8.73678   1
   1  -3  15 21.8484 7.52386   6
   1   3  15 3.65284 6.31233   6
   1   3  15 4.17367 4.54819   3
  -1   3 -15 4.69953 6.98163   6
   1   3  15 4.34567 7.42708   5
   1   3  16 2494.31 81.3503   5
   1   3  16 2654.98 72.9346   3
  -1  -3 -16 2555.87 88.9171   1
  -1   3 -16 2541.79 88.2552   1
   1   3  16 2629.07 79.3108   6
  -1   3 -16 2577.12 84.1778   6
   1  -3  16 2569.10 85.6546   6
   1   3  17 670.537 34.0302   5
  -1   3 -17 653.223 35.0939   6
   1   3  17 734.797 28.0635   3
  -1   3 -17 617.975 37.4949   1
  -1  -3 -17 657.022 38.7776   1
  -1  -3 -18-1.75654 10.1255   1
  -1   3 -18 13.8618 9.83095   1
   1   3  18 5.85155 6.19225   3
  -1   3 -18 5.40588 8.60075   6
  -1   3 -19 317.518 25.9087   6
   1   3  19 415.172 21.0497   3
  -1  -3 -19 360.736 30.3386   1
  -1   3 -19 365.735 30.2494   1
  -1   3 -20 2.90784 9.25274   6
   1   3  20 7.96020 6.43940   3
  -1  -3 -20-3.84666 10.7350   1
  -1   3 -20 19.0690 11.3305   1
   1   3  21 125.499 13.0239   3
   1   3  22 732.710 31.1853   3
  -1   4  25 15.2382 11.5203   3
  -1  -4  24 253.852 24.5607   3
  -1   4  24 251.698 23.7313   3
  -1  -4  23 2.86824 10.9365   3
  -1   4  23 7.28978 9.74296   3
   1  -4 -23 10.4925 8.55457   6
  -1   4  22 1.39616 9.43945   3
  -1  -4  22 12.4235 9.94853   3
   1  -4 -22 16.0532 8.55669   6
   1   4 -22 10.9125 11.7827   6
   1  -4 -21 836.251 36.6198   6
   1   4 -21 820.771 43.2154   6
   1   4 -21 825.824 43.5985   5
   1  -4 -21 822.363 53.9796   2
   1   4 -21 847.975 55.2641   2
  -1  -4  21 946.474 42.8576   3
  -1   4  21 868.783 41.2276   3
   1  -4 -21 893.773 49.6410   1
   1   4 -21 884.726 49.3908   1
   1   4 -20 33.4226 11.9456   6
   1  -4 -20 14.5710 7.94029   6
   1   4 -20 20.5084 11.1784   5
  -1  -4  20 26.3000 9.89426   3
  -1   4  20 30.7235 11.3798   3
   1   4 -20 7.30621 12.9018   2
   1  -4 -20 21.7442 15.1817   2
   1   4 -20 7.52198 11.9741   1
   1  -4 -20 7.49396 13.2330   1
   1   4 -19 199.303 20.1269   5
   1  -4 -19 212.703 16.4335   6
   1   4 -19 206.722 21.0245   6
   1  -4 -19 262.965 29.8513   2
  -1  -4  19 211.607 18.9675   3
  -1   4  19 248.024 20.2552   3
   1   4 -19 187.667 25.9175   2
   1   4 -19 239.666 25.2747   1
   1  -4 -19 233.112 24.6869   1
   1   4 -18 571.862 32.2887   5
   1   4 -18 573.603 32.6033   6
   1  -4 -18 547.311 26.1036   6
   1  -4 -18 554.592 40.8103   2
   1   4 -18 536.575 39.9696   2
  -1   4  18 567.512 30.5224   3
  -1  -4  18 557.693 30.1664   3
   1  -4 -18 529.275 35.4813   1
   1   4 -18 581.536 36.7258   1
   1   4 -17 578.216 31.8115   5
   1  -4 -17 553.938 25.7156   6
   1   4 -17 594.796 32.8910   6
   1  -4 -17 576.251 40.1260   2
   1   4 -17 521.638 38.6954   2
  -1  -4  17 589.604 30.1820   3
  -1   4  17 567.300 30.1795   3
   1  -4 -17 615.883 36.5948   1
   1   4 -17 646.182 37.5093   1
  -1   4  16 1.07280 6.73946   3
  -1  -4  16 1.02949 6.87965   3
   1  -4 -16 16.9763 8.61389   1
   1  -4 -16-1.99693 10.5735   2
   1   4 -16 13.9447 9.86004   1
   1   4 -16 3.89037 10.2996   2
   1   4 -16 8.72878 8.23518   6
   1   4 -16 2.37468 7.65252   5
  -1   4  15 67.6441 11.1853   3
  -1  -4  15 87.3276 11.0866   3
   1   4 -15 77.3620 12.3531   5
   1   4 -15 64.2995 11.7640   6
   1   4 -15 93.2331 16.7494   2
   1  -4 -15 62.2156 14.2211   2
   1  -4 -15 80.1389 14.1896   1
   1   4 -14 71.7619 11.7757   6
   1   4 -14 96.0209 12.6949   5
   1  -4 -14 78.7256 8.19511   6
  -1  -4  14 96.4919 11.2679   3
   1   4 -14 90.1392 15.0395   2
   1  -4 -14 109.582 16.1301   2
   1   4 -13 5323.50 138.897   6
   1  -4 -13 4830.89 126.786   6
  -1  -4  13 5031.32 134.392   3
   1   4 -13 5038.43 133.826   3
   1   4 -13 4880.48 147.521   2
   1  -4 -13 4945.18 149.369   2
   1   4 -12 851.372 42.2612   2
   1  -4 -12 858.239 43.0027   2
  -1  -4  12 847.292 34.6274   3
   1   4 -12 819.424 33.8366   3
   1   4 -12 859.571 36.7861   6
   1  -4 -12 846.895 29.2508   6
   1   4 -11 10.4067 5.16281   3
  -1  -4  11 3.26267 4.99082   3
   1  -4 -11 12.6122 9.14526   2
   1  -4 -11 7.39807 3.80385   6
   1   4 -10 6.81643 4.30104   3
  -1  -4  10 10.8569 5.12452   3
   1  -4 -10 5.84886 3.56670   6
   1   4 -10 14.4305 7.75196   2
   1  -4 -10 12.7373 7.22866   2
   1  -4  -9 1099.59 45.0543   2
   1   4  -9 1111.31 44.2650   2
   1  -4  -9 1050.62 32.4628   6
   1   4  -9 1060.82 38.0693   3
  -1  -4   9 1094.66 38.6199   3
  -1  -4   8 551.859 24.8959   3
   1   4  -8 577.454 24.8180   3
   1  -4  -8 605.366 29.4949   2
   1   4  -8 590.847 28.4393   2
   1   4  -7 6102.01 156.883   3
   1  -4  -7 6320.86 162.729   2
   1   4  -7 6336.38 161.816   2
   1   4  -6 71.9319 7.70630   3
   1  -4  -6 81.9790 9.64901   2
   1   4  -6 85.9251 9.43146   2
   1   4  -5 7090.41 175.744   3
   1  -4  -5 7041.52 176.882   2
   1   4  -5 7232.54 176.827   2
  -1  -4   4 396.829 18.2317   3
   1  -4  -4 386.805 17.7696   2
   1   4  -4 424.925 18.1765   2
  -1   4   4 426.190 19.1917   2
  -1  -4   4 471.072 19.7200   2
  -1  -4   3 870.914 29.7660   3
  -1   4   3 879.810 29.4737   2
  -1  -4   3 937.178 29.8984   2
   1   4  -3 896.581 28.9924   2
   1  -4  -3 881.352 28.8976   2
   1   4  -2 1343.83 38.8481   4
  -1  -4   2 1408.99 39.4409   2
  -1   4   2 1370.98 39.3892   2
   1  -4  -2 1311.11 38.6200   2
   1   4  -2 1440.78 39.1939   2
  -1  -4   1 104.977 6.87383   2
  -1   4   1 94.8177 6.67187   2
   1   4  -1 96.1956 6.68216   4
  -1  -4   1 105.319 7.04075   4
   1  -4   0 699.994 24.2846   4
  -1  -4   0 674.093 22.2090   4
  -1   4   0 721.715 19.6133   5
   1  -4   1 16937.0 399.667   4
   1   4   1 17112.8 397.113   1
   1  -4   1 16860.7 396.918   1
  -1   4  -1 17079.3 394.869   5
   1  -4   2 383.106 16.7666   4
   1  -4   2 386.489 15.2119   1
   1   4   2 408.691 15.6151   1
  -1   4  -2 382.169 14.4760   5
  -1   4  -3 16.7250 3.86961   5
  -1   4  -3 21.1685 4.72728   1
  -1  -4  -3 19.3855 4.54152   1
   1  -4   3 17.6883 4.02357   1
   1   4   3 22.5437 4.25628   1
  -1   4  -3 21.6378 4.66851   6
  -1   4  -4 108.834 8.61108   1
  -1  -4  -4 127.255 9.15653   1
  -1   4  -4 91.0749 7.65343   5
  -1   4  -4 111.917 9.24869   6
   1  -4   4 112.296 8.52436   1
   1   4   4 99.4246 8.40407   1
   1  -4   5 44.0620 6.20398   1
   1   4   5 42.0919 6.39900   1
  -1   4  -5 44.8612 6.70821   1
  -1  -4  -5 42.8987 6.72374   1
  -1   4  -5 49.3888 6.37353   5
   1  -4   5 45.1834 6.74198   6
  -1   4  -6 242.631 14.8253   1
  -1  -4  -6 257.814 15.2013   1
  -1   4  -6 258.941 14.5175   5
   1  -4   6 251.898 15.2804   6
   1  -4   6 263.054 15.4247   1
   1   4   6 224.333 14.4589   1
   1   4   7 2519.48 65.5002   6
   1  -4   7 2426.18 71.9261   6
  -1  -4  -7 2379.63 71.8262   1
  -1   4  -7 2443.88 64.3958   3
   1   4   7 2327.58 71.9612   1
  -1   4  -7 2406.85 72.5782   1
  -1   4  -7 2544.71 70.9239   5
   1   4   8 1374.96 41.4883   6
   1  -4   8 1428.64 48.0330   6
  -1   4  -8 1402.87 40.4012   3
  -1   4  -8 1441.95 49.0893   1
   1  -4   8 1529.80 49.8845   1
   1   4   8 1356.53 48.4300   1
  -1   4  -8 1449.04 47.1297   5
   1   4   9 4391.30 113.419   6
   1  -4   9 4612.38 122.293   6
  -1   4  -9 4459.60 111.677   3
   1   4   9 4497.82 123.681   1
  -1   4  -9 4434.60 122.647   1
  -1   4  -9 4578.19 120.438   5
   1  -4  10 795.414 34.4349   6
   1   4  10 799.542 28.7337   6
  -1   4 -10 815.804 33.4261   5
  -1   4 -10 798.166 26.7237   3
  -1   4 -10 805.022 35.4450   1
  -1  -4 -10 799.690 35.2519   1
  -1   4 -11 2.78994 5.36149   5
   1   4  11 6.60108 5.51430   5
  -1   4 -11 8.85099 6.27762   1
  -1  -4 -11 4.46497 6.63291   1
  -1   4 -11 2.69739 3.20836   3
   1  -4  11 4.09553 5.71527   6
   1   4  11 7.12319 4.52750   6
   1   4  12 199.388 13.4341   6
   1  -4  12 163.731 15.5576   6
  -1   4 -12 182.852 10.8966   3
  -1  -4 -12 173.916 16.3480   1
  -1   4 -12 177.883 16.8433   1
  -1   4 -12 151.558 14.6487   5
   1   4  12 155.849 14.0512   5
   1  -4  13 509.394 28.2886   6
   1   4  13 495.965 22.8370   6
  -1   4 -13 483.412 27.2225   6
  -1   4 -13 448.344 27.8866   1
  -1  -4 -13 490.491 29.0493   1
  -1   4 -13 440.534 19.0245   3
  -1   4 -13 460.964 26.2888   5
   1   4  13 482.355 25.5217   5
  -1   4 -14 778.802 39.1277   1
  -1  -4 -14 803.486 39.6576   1
  -1   4 -14 819.135 37.5251   6
   1   4  14 774.820 31.7296   6
   1  -4  14 863.553 39.2631   6
   1   4  14 711.212 33.6629   5
   1  -4  15 1839.61 66.0578   6
  -1   4 -15 1746.11 63.6528   6
   1   4  15 1774.14 57.2074   6
   1   4  15 1761.65 53.9691   3
   1   4  15 1778.25 61.4699   5
  -1  -4 -15 1777.13 67.1836   1
  -1   4 -15 1718.45 66.2408   1
   1   4  16 371.687 23.9936   5
   1   4  16 359.272 18.8679   3
  -1   4 -16 351.306 27.1712   1
  -1  -4 -16 329.559 26.6387   1
  -1   4 -16 372.456 25.4177   6
   1   4  16 365.308 21.4646   6
   1   4  17 654.801 33.5804   5
  -1   4 -17 667.561 36.0039   6
   1   4  17 695.968 28.5149   3
  -1  -4 -17 720.903 40.3596   1
  -1   4 -17 690.755 39.1436   1
  -1   4 -18 104.325 17.1207   1
  -1  -4 -18 136.238 19.2027   1
   1   4  18 126.305 12.0921   3
  -1   4 -18 131.373 17.1941   6
   1   4  18 108.011 14.8516   5
  -1  -4 -19 78.9596 16.1975   1
  -1   4 -19 82.6210 16.4696   1
   1   4  19 84.2002 10.4625   3
  -1   4 -19 67.5554 14.4675   6
  -1   4 -20 592.395 36.5100   6
  -1  -4 -20 548.746 38.6055   1
  -1   4 -20 571.983 39.0576   1
   1   4  21 30.1146 8.75109   3
  -1   4 -21 31.3011 12.8758   6
   1   4  22 409.124 23.0980   3
  -1   5  25 7.65300 9.48824   3
  -1   5  24 1678.23 65.8536   3
  -1   5  23 154.160 18.4300   3
  -1   5  22 302.102 24.6615   3
  -1  -5  22 313.855 25.3940   3
   1  -5 -21 5.32366 7.06124   6
   1   5 -21 3.15364 10.6576   6
  -1   5  21 2.70119 8.48342   3
  -1  -5  21 2.68103 8.95694   3
   1   5 -21-3.86156 13.3433   1
   1  -5 -21-2.46986 13.7843   2
   1   5 -21-2.50412 12.7578   2
   1  -5 -20 6.69913 6.33020   6
   1   5 -20 4.55508 9.78633   6
   1   5 -20 4.44418 9.18324   5
  -1   5  20 18.2205 9.92523   3
  -1  -5  20 14.1034 8.86216   3
   1   5 -20 11.9324 12.6365   2
   1  -5 -20 2.37897 12.1214   2
   1   5 -20-1.86447 11.8654   1
   1  -5 -20 5.53235 11.2756   1
   1   5 -19 308.116 24.5719   5
   1  -5 -19 329.146 19.3744   6
   1   5 -19 300.942 24.7728   6
   1  -5 -19 266.819 29.7257   2
   1   5 -19 295.740 31.3312   2
  -1  -5  19 365.072 24.3471   3
  -1   5  19 302.403 22.5670   3
   1   5 -19 301.954 26.9856   1
   1  -5 -19 335.837 27.7300   1
   1   5 -18 3228.06 105.412   1
   1  -5 -18 3298.53 105.767   1
   1   5 -18 3039.61 98.0200   5
   1   5 -18 3231.20 100.479   6
   1  -5 -18 3077.24 87.6199   6
   1   5 -18 3013.80 111.285   2
   1  -5 -18 2988.34 111.454   2
  -1  -5  18 3097.94 95.4055   3
  -1   5  18 3025.19 95.3800   3
  -1  -5  17 6.71738 8.38612   3
  -1   5  17 11.5521 9.27131   3
   1   5 -17 2.03174 11.1509   2
   1  -5 -17 24.0905 10.2223   1
   1   5 -17 14.6241 9.36878   1
   1  -5 -17 8.32645 11.2259   2
   1   5 -17 12.2408 9.70369   6
   1   5 -17 3.87076 8.62415   5
   1   5 -16 6298.69 173.764   5
   1   5 -16 6188.15 187.559   2
   1  -5 -16 6464.15 189.741   2
   1   5 -16 6739.17 177.365   6
  -1  -5  16 6413.81 171.758   3
   1  -5 -16 6550.92 180.706   1
   1   5 -16 6525.71 181.125   1
   1   5 -15 562.974 33.8884   1
   1  -5 -15 556.445 33.3159   1
   1   5 -15 578.304 31.5095   6
   1  -5 -15 569.581 23.7447   6
   1   5 -15 591.965 37.9177   2
   1  -5 -15 578.872 37.9435   2
  -1  -5  15 543.749 28.7488   3
   1   5 -15 629.031 29.6823   3
  -1  -5  14 10.7734 6.40280   3
   1   5 -14 16.4850 6.49186   3
   1   5 -14 18.2689 10.4397   2
   1  -5 -14 26.2017 10.3862   2
   1   5 -14 21.5072 9.28086   6
   1  -5 -14 19.5354 5.26113   6
  -1  -5  13 10.3201 6.04928   3
   1   5 -13 19.3529 6.77428   3
   1   5 -13 4.61614 8.44550   2
   1  -5 -13 4.89252 7.79672   2
   1   5 -13 13.6463 8.11355   6
   1  -5 -13 4.87936 4.01328   6
   1  -5 -12 1671.39 65.9189   2
   1   5 -12 1757.13 65.3607   2
   1  -5 -12 1685.93 47.9338   6
  -1  -5  12 1623.89 55.8655   3
   1   5 -12 1691.02 55.9260   3
   1  -5 -11 797.584 39.4377   2
   1   5 -11 741.722 37.2668   2
   1  -5 -11 701.044 24.2362   6
  -1  -5  11 731.792 31.6902   3
   1   5 -11 768.770 31.5755   3
   1  -5 -10 7160.58 190.487   2
   1   5 -10 7291.98 189.298   2
  -1  -5  10 6989.31 181.069   3
   1   5 -10 7039.38 180.789   3
   1  -5 -10 7082.07 170.339   6
   1   5  -9 23.0422 5.84608   3
  -1  -5   9 26.6851 6.67970   3
   1   5  -9 30.6665 8.02148   2
   1  -5  -9 28.2319 8.16645   2
   1  -5  -9 36.8315 4.33695   6
   1   5  -8 2552.78 76.3154   3
  -1  -5   8 2639.32 77.0336   3
   1  -5  -8 2676.67 67.2242   6
   1  -5  -8 2668.12 81.7882   2
   1   5  -7 10.2652 4.78172   3
   1  -5  -7 2.59296 5.13640   2
   1   5  -7 1.63386 4.63588   2
   1   5  -6 3.89781 3.68663   3
   1   5  -6 11.1182 5.00750   2
   1  -5  -6-0.73142 4.59509   2
   1   5  -5 6.68401 4.01476   3
   1   5  -5 9.30546 4.39693   2
   1  -5  -5 3.03303 3.81255   2
  -1   5   4 5410.37 140.465   2
   1   5  -4 5723.89 139.805   2
   1  -5  -4 5397.03 139.350   2
   1  -5  -3 496.346 19.0943   2
   1   5  -3 512.023 19.2442   2
  -1   5   3 499.656 19.8134   2
  -1  -5   3 513.620 19.9981   2
   1   5  -3 482.258 19.8300   4
  -1   5   2 19560.0 464.141   2
  -1  -5   2 20016.7 464.228   2
   1  -5  -2 19706.8 461.031   6
   1   5  -2 20310.9 463.405   2
   1   5  -2 19951.5 465.662   4
  -1   5   1 178.537 6.48415   5
   1  -5  -1 180.668 8.84989   6
  -1  -5   1 189.070 9.31729   2
  -1   5   1 198.872 9.53194   2
  -1  -5   1 187.263 10.6310   4
   1   5  -1 176.962 10.1129   4
   1  -5   0 933.232 31.5444   4
  -1  -5   0 968.672 29.9098   4
   1  -5   0 919.340 28.4308   6
  -1   5   0 939.899 25.5881   5
   1  -5   1 472.280 20.2714   4
   1   5   1 481.405 17.2158   1
   1  -5   1 479.412 17.1103   1
   1  -5   1 480.794 18.2747   6
  -1   5  -1 489.714 16.2700   5
   1  -5   2 3047.85 82.0703   4
  -1   5  -2 3089.71 80.4125   6
   1   5   2 3000.16 77.6507   1
   1  -5   2 3072.16 77.6096   1
  -1   5  -2 3057.49 77.2775   5
  -1   5  -3 1508.55 43.5859   1
  -1  -5  -3 1468.52 43.3949   1
  -1   5  -3 1476.00 42.8366   5
  -1   5  -3 1532.71 45.5979   6
   1   5   3 1484.71 43.2153   1
   1  -5   3 1562.84 43.3787   1
  -1  -5  -4 11228.5 264.726   1
  -1   5  -4 10947.0 264.461   1
  -1   5  -4 11166.3 263.994   5
  -1   5  -4 10969.6 266.823   6
   1  -5   4 11323.8 264.464   1
   1   5   4 10701.1 264.019   1
  -1   5  -5 1032.91 33.3276   1
  -1  -5  -5 919.271 32.7415   1
  -1   5  -5 987.386 32.6255   5
  -1   5  -5 983.354 34.8892   6
   1  -5   5 922.960 32.6562   1
   1   5   5 930.908 32.9204   1
  -1  -5  -6 9140.69 227.478   1
  -1   5  -6 9496.60 227.667   1
  -1   5  -6 9419.54 226.931   5
   1  -5   6 9528.49 228.531   1
   1   5   6 8873.58 227.819   1
   1   5   7 510.816 18.7509   6
   1  -5   7 534.827 24.7206   6
  -1   5  -7 548.888 23.6308   5
  -1  -5  -7 496.985 23.5500   1
  -1   5  -7 497.575 23.8063   1
  -1   5  -7 504.043 19.7852   3
   1  -5   7 538.796 24.6640   1
   1   5   7 549.009 24.6839   1
   1   5   8 2.41635 3.25736   6
   1  -5   8 11.0777 5.95271   6
  -1   5  -8-2.48542 5.40547   1
  -1   5  -8-0.74500 4.80121   5
  -1   5  -8 2.70470 3.28050   3
   1   5   8 5.09266 5.33149   1
   1  -5   8 0.86300 4.65326   1
   1   5   9 269.300 13.3045   6
   1  -5   9 259.452 18.1137   6
  -1   5  -9 284.529 13.8920   3
  -1   5  -9 267.636 18.3262   1
  -1   5  -9 304.687 18.3024   5
   1  -5  10 683.927 31.8265   6
   1   5  10 658.861 24.5734   6
  -1   5 -10 682.094 24.8820   3
  -1   5 -10 723.182 32.4970   1
  -1  -5 -10 653.659 31.2940   1
  -1   5 -10 698.078 30.5978   5
   1  -5  11 561.405 28.9653   6
   1   5  11 516.169 21.4988   6
  -1   5 -11 537.167 21.4228   3
  -1   5 -11 527.458 28.1504   1
  -1  -5 -11 508.727 27.7698   1
  -1   5 -11 501.960 26.3143   5
   1   5  11 516.246 25.4117   5
   1  -5  12 7422.82 188.876   6
   1   5  12 6875.77 175.299   6
  -1   5 -12 7140.93 174.365   3
  -1  -5 -12 7340.97 189.046   1
  -1   5 -12 6859.15 187.190   1
   1   5  12 6820.72 181.371   5
  -1   5 -12 7261.09 185.379   5
   1   5  13 787.067 30.2924   6
   1  -5  13 855.088 39.0292   6
  -1   5 -13 802.200 28.8245   3
  -1  -5 -13 756.024 37.7947   1
  -1   5 -13 791.818 38.2261   1
  -1   5 -13 809.107 36.4948   5
   1   5  13 774.563 34.0455   5
   1   5  14 1196.13 45.8320   5
  -1   5 -14 1195.83 48.0906   5
  -1   5 -14 1258.16 51.4170   1
  -1  -5 -14 1137.98 50.1023   1
  -1   5 -14 1212.28 39.5440   3
  -1   5 -14 1233.40 49.9414   6
   1   5  14 1193.86 41.4676   6
   1  -5  14 1265.64 51.3434   6
   1  -5  15 431.768 28.5971   6
  -1   5 -15 474.205 28.7997   6
   1   5  15 446.922 22.3585   6
  -1   5 -15 453.742 27.5133   5
   1   5  15 437.450 25.3121   5
  -1   5 -15 400.874 28.0514   1
  -1  -5 -15 461.467 29.7529   1
  -1   5 -16 21.2884 10.4070   1
  -1  -5 -16 31.0934 11.2137   1
   1   5  16 28.5803 8.96296   5
  -1   5 -16 13.5083 8.93569   6
  -1   5 -17 86.7183 15.4863   1
  -1  -5 -17 65.8026 14.5644   1
   1   5  17 94.6931 10.7726   3
   1   5  17 114.076 14.2168   5
  -1   5 -17 80.3847 14.5152   6
   1   5  18 751.248 37.2489   5
  -1   5 -18 775.127 40.7499   6
   1   5  18 844.731 33.1849   3
  -1  -5 -18 830.195 44.4127   1
  -1   5 -18 754.476 42.9106   1
  -1   5 -19 26.6095 11.8608   1
  -1  -5 -19 29.1255 12.7233   1
   1   5  19 12.8602 6.83639   3
   1   5  19 18.4677 10.2454   5
  -1   5 -19 19.8153 11.2080   6
  -1   5 -20 1056.47 51.1986   6
  -1   5 -20 1068.18 54.0941   1
  -1  -5 -20 1002.11 53.6211   1
   1   5  21 59.2818 10.6914   3
  -1   5 -21 68.4159 15.0063   6
   1   5  22 6.40549 6.85330   3
  -1   6  24 127.258 18.0918   3
  -1   6  23 82.8055 14.9234   3
  -1   6  22 309.797 25.3875   3
   1  -6 -21 244.573 30.4323   2
  -1   6  21 260.653 22.5379   3
   1   6 -21 216.197 28.3193   2
   1   6 -20 53.0676 13.5088   5
  -1   6  20 46.2747 12.1695   3
   1  -6 -20 45.2702 14.0906   1
   1   6 -20 49.4891 14.0151   1
   1  -6 -20 27.9564 14.2812   2
   1   6 -20 46.8630 15.6909   2
   1   6 -20 48.9092 13.7750   6
   1   6 -19 126.969 21.3155   2
   1   6 -19 130.002 19.7336   1
   1  -6 -19 172.793 21.6777   1
   1  -6 -19 152.332 23.6302   2
   1   6 -19 187.650 20.3681   6
   1   6 -19 151.937 18.1900   5
  -1  -6  19 136.208 16.2473   3
  -1   6  19 133.397 16.3563   3
  -1  -6  18 12.0859 7.88998   3
  -1   6  18 21.0114 9.75881   3
   1  -6 -18 2.14630 11.1546   2
   1   6 -18 12.6476 11.9619   2
   1   6 -18 10.0668 11.4713   1
   1  -6 -18 11.6537 11.7558   1
   1   6 -18 9.77093 9.11109   5
   1   6 -18 13.2756 10.9454   6
   1   6 -17 1272.23 53.1101   6
   1   6 -17 1215.25 59.4585   2
   1  -6 -17 1146.32 59.1340   2
  -1  -6  17 1239.78 49.3386   3
   1   6 -17 1276.10 55.5305   1
   1  -6 -17 1338.38 56.4591   1
   1   6 -16 15.3923 7.78357   3
  -1  -6  16 29.9756 9.48274   3
   1   6 -16 28.7214 10.4631   1
   1  -6 -16 19.5278 11.7862   2
   1  -6 -16 49.7317 11.6081   1
   1   6 -16 31.7139 12.7648   2
   1   6 -16 24.4164 9.69287   6
   1  -6 -16 23.1341 6.00358   6
   1   6 -15 110.178 17.4421   2
   1   6 -15 92.6614 14.6498   1
   1  -6 -15 130.908 18.7517   2
   1  -6 -15 96.7336 14.2559   1
   1  -6 -15 99.1585 8.74303   6
   1   6 -15 110.740 13.0277   3
   1   6 -15 124.569 15.3782   6
  -1  -6  15 96.9661 13.0228   3
   1  -6 -14 87.7075 8.16895   6
   1   6 -14 82.7007 11.1013   3
  -1  -6  14 91.1343 12.4589   3
   1  -6 -14 86.6287 15.8150   2
   1   6 -14 76.4705 14.5872   2
   1  -6 -14 89.6922 13.0192   1
   1   6 -13 998.343 47.2658   2
   1  -6 -13 999.524 48.5840   2
  -1  -6  13 954.021 39.6623   3
   1   6 -13 1010.95 39.8201   3
   1  -6 -13 983.773 30.9284   6
   1   6 -12 34.1849 8.17126   3
  -1  -6  12 15.1301 6.41482   3
   1  -6 -12 25.4720 10.3693   2
   1   6 -12 42.9313 10.3839   2
   1  -6 -12 21.5876 4.23158   6
  -1  -6  11 484.186 25.2865   3
   1   6 -11 483.577 24.8248   3
   1  -6 -11 518.389 17.6847   6
   1   6 -11 480.291 29.0117   2
   1  -6 -11 530.663 31.4733   2
   1  -6 -10 50.4231 4.54055   6
   1   6 -10 39.0024 8.42772   6
   1   6 -10 36.0140 7.48270   3
  -1  -6  10 35.7388 7.60438   3
   1   6 -10 41.3411 8.81481   2
   1  -6 -10 56.0350 10.9617   2
  -1  -6   9 1237.92 45.1241   3
   1   6  -9 1297.28 45.0920   3
   1  -6  -9 1271.40 33.8988   6
   1   6  -9 1269.76 48.1321   2
   1  -6  -9 1331.63 50.3347   2
   1   6  -8 318.927 18.2620   3
   1  -6  -8 291.673 10.2807   6
   1   6  -8 335.680 20.0559   2
   1  -6  -8 305.344 19.9672   2
   1   6  -7 299.958 17.4922   3
   1  -6  -7 278.696 9.63134   6
   1   6  -7 333.250 18.8567   2
   1  -6  -7 312.552 18.8226   2
   1   6  -6 28.9757 6.23461   3
   1   6  -6 27.6171 6.25500   2
   1  -6  -6 36.8687 6.88986   2
   1   6  -5 1665.80 51.7784   3
   1  -6  -5 1572.08 49.5354   2
   1   6  -5 1746.46 50.4148   2
   1  -6  -4 2489.21 62.7715   6
   1  -6  -4 2668.07 70.1558   2
   1   6  -4 2764.37 70.2174   2
   1   6  -4 2641.51 72.4573   4
  -1   6   3 2836.07 77.3871   2
  -1  -6   3 3018.55 78.0635   2
   1  -6  -3 2837.15 72.1686   6
   1  -6  -3 3019.82 76.7596   2
   1   6  -3 3186.28 77.3033   2
   1   6  -3 2955.54 79.8659   4
   1   6  -2 730.246 26.7188   4
  -1  -6   2 808.663 24.9846   2
  -1   6   2 738.942 24.5010   2
   1  -6  -2 719.352 22.3403   6
   1  -6  -1 353.790 17.9626   4
  -1  -6   1 381.960 17.0502   4
   1  -6  -1 366.481 14.1228   6
  -1  -6   1 348.127 13.7012   2
  -1   6   1 343.662 13.7764   2
  -1   6   0 2500.16 63.1580   5
   1  -6   0 2512.92 71.1766   4
  -1  -6   0 2573.76 69.1923   4
   1  -6   0 2643.34 66.6164   6
  -1   6   0 2549.70 64.2668   2
  -1  -6   0 2478.14 64.0064   2
  -1  -6  -1 6905.29 171.093   4
   1  -6   1 7167.29 174.350   4
   1  -6   1 6990.12 166.696   1
   1   6   1 7028.40 167.091   1
  -1   6  -1 6840.51 166.266   5
   1  -6   1 6973.06 169.433   6
   1  -6   2 188.028 13.0382   4
  -1   6  -2 191.448 10.1423   5
  -1   6  -2 204.268 12.1919   6
   1  -6   2 227.445 12.5234   6
   1   6   2 199.173 10.2385   1
   1  -6   2 218.236 10.3830   1
   1  -6   3 5.59227 4.30253   6
  -1   6  -3 4.71747 3.81009   5
  -1   6  -3 0.58932 3.75059   6
  -1  -6  -3 3.42989 3.21089   1
  -1   6  -3 4.13600 3.45020   1
   1  -6   3 0.81229 3.12509   1
   1   6   3 2.46463 3.16068   1
  -1   6  -4 2093.06 58.1133   5
   1   6   4 1968.43 57.0749   1
   1  -6   4 2099.97 57.7590   1
  -1   6  -4 2096.17 61.1416   6
  -1  -6  -4 2167.78 58.1429   1
  -1   6  -4 1965.61 57.7375   1
  -1   6  -5 1271.33 41.0637   5
   1  -6   5 1400.89 42.0073   1
   1   6   5 1273.77 40.9681   1
  -1   6  -5 1284.07 43.7759   6
  -1  -6  -5 1359.73 41.8756   1
  -1   6  -5 1263.73 40.9122   1
  -1   6  -6 317.156 16.7346   5
   1   6   6 281.113 16.4040   1
   1  -6   6 304.845 16.8688   1
  -1   6  -6 298.262 17.7975   6
  -1   6  -6 304.585 16.5550   1
  -1  -6  -6 280.673 15.8718   1
  -1  -6  -7 403.044 20.9185   1
  -1   6  -7 425.016 21.2784   1
   1  -6   7 442.137 21.8275   1
   1   6   7 443.643 21.7815   1
  -1   6  -7 410.515 20.5573   5
  -1   6  -8 19.3393 6.27236   5
  -1   6  -8 20.2454 6.08017   1
  -1   6  -8 14.4575 4.71481   3
   1  -6   8 20.9678 7.20925   6
   1   6   8 22.8316 4.13477   6
   1   6   9 2744.50 71.5532   6
  -1   6  -9 2778.31 83.1125   6
   1  -6   9 2708.14 82.9096   6
  -1   6  -9 2626.13 74.0399   3
  -1   6  -9 2832.41 82.0124   1
  -1   6  -9 2760.61 80.3743   5
   1  -6  10 2422.99 74.5232   6
  -1   6 -10 2318.96 73.2849   6
   1   6  10 2232.20 61.6429   6
  -1   6 -10 2271.24 70.5991   5
  -1   6 -10 2262.91 64.1997   3
  -1   6 -10 2282.12 72.2293   1
  -1  -6 -10 2201.26 71.8791   1
  -1   6 -11 66.1196 10.8628   6
  -1  -6 -11 52.5786 9.83271   1
  -1   6 -11 65.7531 10.6296   1
  -1   6 -11 62.1474 10.5413   5
   1  -6  11 58.5843 10.8837   6
   1   6  11 69.4891 7.32936   6
  -1   6 -11 56.5233 7.48749   3
  -1   6 -12 2191.43 70.7034   5
   1   6  12 2015.90 66.3458   5
  -1   6 -12 2285.93 63.0835   3
  -1   6 -12 2193.69 72.5534   1
  -1  -6 -12 2220.71 72.6652   1
   1  -6  12 2336.07 74.5267   6
   1   6  12 2009.75 60.3420   6
   1   6  13 501.090 26.1205   5
  -1   6 -13 560.440 29.4379   5
   1   6  13 487.892 21.6402   6
   1  -6  13 546.601 30.7903   6
  -1   6 -13 523.424 22.4983   3
  -1   6 -13 470.846 28.4745   1
  -1  -6 -13 456.243 28.2769   1
  -1   6 -14 140.082 15.4820   5
   1   6  14 164.581 15.0786   5
   1  -6  14 155.117 17.1530   6
   1   6  14 165.599 12.1544   6
  -1   6 -14 120.340 15.4839   1
  -1   6 -14 137.227 11.4452   3
  -1  -6 -14 148.695 17.1326   1
   1   6  15 469.305 22.5259   6
  -1   6 -15 493.655 22.5224   3
  -1   6 -15 486.643 30.7253   1
  -1  -6 -15 510.193 31.1933   1
   1   6  15 504.330 27.0302   5
  -1   6 -15 496.760 29.1692   5
   1   6  16 753.617 36.0589   5
  -1   6 -16 811.020 39.6917   5
  -1   6 -16 768.968 40.1638   6
  -1   6 -16 777.763 41.1441   1
  -1  -6 -16 830.038 42.4462   1
  -1   6 -16 878.222 32.2988   3
  -1   6 -17 117.815 18.5473   1
  -1  -6 -17 89.7204 16.2549   1
  -1   6 -17 100.875 15.7674   6
   1   6  17 77.5913 12.8177   5
   1   6  18 639.664 33.1955   5
  -1   6 -18 628.368 36.8049   6
   1   6  18 633.258 28.9154   3
  -1  -6 -18 666.617 39.4764   1
  -1   6 -18 624.854 37.8656   1
   1   6  19 143.646 14.1361   3
  -1   6 -19 137.225 19.2554   1
  -1  -6 -19 133.785 19.6860   1
  -1   6 -19 144.726 18.8453   6
   1   6  19 157.080 17.5486   5
   1   6  20 158.966 14.9168   3
  -1  -6 -20 143.760 21.1045   1
  -1   6 -20 136.282 20.2156   1
  -1   6 -20 122.645 19.1345   6
   1   6  21 31.1562 8.89795   3
   1   6  22 82.2876 11.4006   3
  -1   7  24 47.8093 13.1413   3
  -1   7  23 20.5640 10.8030   3
  -1   7  22 626.069 35.9196   3
   1   7 -21 16.9056 14.3492   2
  -1   7  21-1.39198 8.74367   3
   1   7 -20 1639.94 65.4246   6
   1   7 -20 1499.15 65.3461   1
   1  -7 -20 1428.52 64.0278   1
  -1   7  20 1504.51 59.2725   3
   1  -7 -20 1600.34 73.1440   2
   1   7 -20 1491.95 71.8746   2
   1   7 -19 498.925 33.0163   6
   1   7 -19 487.930 37.8514   2
   1  -7 -19 408.257 35.7782   2
  -1   7  19 507.453 30.4855   3
   1   7 -19 515.298 34.9734   1
   1  -7 -19 526.445 34.8445   1
   1  -7 -18 97.3248 18.7411   2
   1   7 -18 57.7455 15.8098   2
   1   7 -18 62.7141 14.5576   1
   1  -7 -18 64.1320 14.4086   1
   1   7 -18 84.0016 15.3349   6
   1   7 -17 19.0065 8.65615   3
   1   7 -17 29.2726 10.8669   6
   1  -7 -17 20.2398 12.2094   2
   1  -7 -17 14.1124 10.9631   1
   1   7 -17 27.1997 12.0504   2
   1   7 -17 12.5426 10.4856   1
   1   7 -16 192.446 19.6059   6
   1   7 -16 166.329 15.9197   3
   1  -7 -16 138.037 17.9545   1
   1  -7 -16 155.898 21.0793   2
   1   7 -16 137.113 19.8818   2
   1   7 -16 176.909 20.1484   1
   1   7 -15 266.345 19.5523   3
   1  -7 -15 267.550 25.8953   2
   1   7 -15 245.645 23.6642   2
   1  -7 -15 240.518 21.2911   1
   1   7 -15 258.540 21.9819   1
   1   7 -14 4216.33 131.953   2
   1  -7 -14 4188.76 133.949   2
   1   7 -14 4454.39 122.850   3
   1  -7 -14 4419.89 108.616   6
   1   7 -14 4354.29 127.681   1
   1  -7 -14 4459.10 128.314   1
   1  -7 -13 87.0171 6.51543   6
   1   7 -13 95.1613 11.8385   3
   1   7 -13 88.4438 14.7738   2
   1  -7 -13 73.7297 15.0111   2
   1  -7 -13 84.2324 12.7773   1
   1   7 -12 3522.03 100.304   3
   1  -7 -12 3586.49 110.525   2
   1   7 -12 3508.99 107.332   2
   1  -7 -12 3403.61 84.7694   6
   1   7 -11 493.422 25.2642   3
   1   7 -11 451.307 27.7048   2
   1  -7 -11 494.163 29.9647   2
   1  -7 -11 462.970 14.7547   6
   1   7 -11 462.067 26.5125   6
   1   7 -10 88.7224 10.4414   3
   1   7 -10 87.0855 11.5743   6
   1  -7 -10 91.8652 4.53342   6
   1   7 -10 82.2673 11.9501   2
   1  -7 -10 103.691 13.4150   2
   1   7  -9 52.4820 9.02622   6
   1   7  -9 55.9612 8.53245   3
   1   7  -9 73.7836 10.1969   2
   1  -7  -9 85.4361 11.4217   2
   1   7  -8 285.810 17.8104   3
   1   7  -8 280.846 18.6736   6
   1   7  -8 295.830 18.5552   2
   1  -7  -8 268.294 18.5945   2
   1  -7  -7 912.211 34.9219   2
   1   7  -7 902.168 34.3459   2
   1   7  -7 862.161 34.7002   3
  -1   7   7 854.836 25.3091   5
   1   7  -6 5346.85 138.262   4
   1  -7  -6 5210.03 136.345   2
   1   7  -6 5571.96 136.419   2
   1   7  -6 5555.16 139.370   3
  -1   7   6 5161.49 125.589   5
   1   7  -5 363.799 19.0063   4
   1  -7  -5 373.792 17.3237   2
   1   7  -5 347.545 16.6879   2
  -1   7   5 324.797 10.5641   5
   1   7  -4 2196.11 63.6606   4
   1  -7  -4 2061.85 52.6628   6
   1  -7  -4 2251.70 59.6610   2
   1   7  -4 2211.20 59.3171   2
   1   7  -3 0.63678 4.05219   4
   1  -7  -3 4.92613 2.88963   2
   1   7  -3-0.75023 2.35645   2
  -1   7   3 2.24017 3.22831   2
   1  -7  -3 1.83399 2.14122   6
   1   7  -2 616.370 24.8470   4
  -1  -7   2 652.096 21.7408   2
  -1   7   2 581.097 20.9718   2
   1  -7  -2 624.584 20.1359   6
  -1  -7   1 1535.90 47.2367   4
   1  -7  -1 1457.04 48.4152   4
  -1  -7   1 1538.89 41.4187   2
  -1   7   1 1497.84 41.3919   2
   1  -7  -1 1530.17 42.4026   6
   1  -7   0 5286.71 129.515   1
   1   7   0 5351.29 129.660   1
   1  -7   0 5400.02 132.574   6
  -1   7   0 5552.12 129.630   2
  -1  -7   0 5228.37 129.127   2
  -1  -7   0 5315.66 136.363   4
   1  -7   0 5545.64 139.291   4
  -1  -7  -1 872.362 31.6821   4
   1  -7   1 981.262 34.9794   4
  -1   7  -1 959.790 31.0203   6
   1  -7   1 911.212 30.2411   6
   1  -7   1 896.123 26.5874   1
   1   7   1 866.500 26.6707   1
  -1   7  -2 6157.19 151.765   5
   1  -7   2 6453.06 159.729   4
   1  -7   2 6249.16 155.229   6
  -1   7  -2 6344.91 155.793   6
   1  -7   2 6139.09 150.404   1
   1   7   2 6201.63 150.451   1
   1  -7   3 2.36158 2.80870   1
   1   7   3 1.99713 3.25710   1
   1  -7   3 4.89524 4.58255   6
  -1   7  -3 3.83155 4.06446   6
  -1   7  -3 7.92133 3.73948   5
  -1  -7  -4 79.3260 7.39506   1
  -1   7  -4 69.9329 7.00772   1
  -1   7  -4 78.9309 7.79644   5
   1  -7   4 69.3714 8.23568   6
  -1   7  -4 78.4930 8.61162   6
   1  -7   4 55.1880 6.35595   1
   1   7   4 63.8208 6.52112   1
  -1   7  -5 237.584 13.2762   1
  -1  -7  -5 209.813 12.9210   1
  -1   7  -5 204.976 13.1530   5
  -1   7  -5 235.815 15.3052   6
   1  -7   5 222.415 13.3967   1
   1   7   5 205.670 12.7080   1
  -1  -7  -6 581.692 24.4645   1
  -1   7  -6 577.813 24.2548   1
  -1   7  -6 594.626 25.0408   5
  -1   7  -6 606.086 27.3084   6
   1  -7   6 594.418 24.8700   1
   1   7   6 553.961 24.2817   1
  -1  -7  -7 2862.19 84.8363   1
  -1   7  -7 2947.49 84.8668   1
  -1   7  -7 3260.84 86.8589   5
  -1   7  -7 3192.76 89.9897   6
   1   7   7 3080.51 86.2835   1
  -1   7  -8 6569.31 161.801   5
  -1   7  -8 6323.18 161.043   1
  -1   7  -8 5956.83 156.448   3
  -1   7  -8 6467.69 165.258   6
   1   7   8 6150.64 150.455   6
  -1   7  -9 49.7658 8.61195   5
  -1   7  -9 53.6896 8.77262   1
  -1   7  -9 51.6075 7.17815   3
   1   7   9 43.5867 5.27169   6
  -1   7 -10 2490.59 77.9264   6
   1  -7  10 2451.73 77.8378   6
   1   7  10 2389.34 63.8471   6
  -1  -7 -10 2333.60 74.6807   1
  -1   7 -10 2396.12 68.7918   3
  -1   7 -10 2415.27 75.3821   1
  -1   7 -10 2438.57 74.7243   5
   1  -7  11 235.932 19.4387   6
   1   7  11 236.895 12.2265   6
  -1   7 -11 234.963 18.9707   6
  -1   7 -11 241.356 17.9575   5
  -1   7 -11 241.963 14.6579   3
  -1  -7 -11 209.587 17.3748   1
  -1   7 -11 235.628 18.4507   1
   1   7  12 114.521 8.83597   6
   1  -7  12 145.108 15.6338   6
  -1  -7 -12 89.3325 12.7591   1
  -1   7 -12 107.622 10.2376   3
  -1   7 -12 110.809 13.8491   1
  -1   7 -12 98.5450 13.4769   6
  -1   7 -12 119.061 13.9545   5
   1  -7  13 499.596 29.8572   6
   1   7  13 416.830 18.9072   6
  -1   7 -13 500.445 22.5391   3
  -1   7 -13 461.454 28.0812   1
  -1  -7 -13 442.902 27.5626   1
   1   7  13 441.133 24.2814   5
  -1   7 -13 456.389 26.8561   5
   1   7  14 816.637 29.8190   6
  -1   7 -14 821.965 38.9303   5
   1   7  14 832.395 36.3417   5
  -1   7 -14 822.439 40.0686   1
  -1  -7 -14 884.827 41.2893   1
  -1   7 -14 888.486 33.0714   3
  -1   7 -15 949.735 43.0901   5
   1   7  15 915.657 39.2506   5
  -1   7 -15 909.318 43.7966   1
  -1  -7 -15 918.775 44.1682   1
  -1   7 -15 1036.00 36.6357   3
   1   7  16 3725.16 112.200   5
  -1   7 -16 3891.96 117.675   5
  -1   7 -16 4142.61 107.665   3
  -1   7 -16 3804.42 119.280   1
  -1  -7 -16 3930.84 120.779   1
  -1   7 -17 17.1597 9.77950   5
  -1   7 -17 3.03009 9.13850   6
   1   7  17 11.8948 8.91218   5
  -1   7 -17 16.5369 6.85203   3
  -1   7 -17 15.8357 10.2101   1
  -1  -7 -17 25.9223 11.4418   1
   1   7  18 177.562 17.8709   5
  -1   7 -18 187.354 21.1436   6
  -1   7 -18 136.598 18.8326   1
  -1  -7 -18 172.223 21.0564   1
  -1  -7 -19 12.5095 10.6228   1
  -1   7 -19 10.4804 11.1198   1
   1   7  19 11.6304 9.22306   5
  -1   7 -19 17.9569 10.7849   6
   1   7  19 17.1792 7.47700   3
  -1  -7 -20 16.7920 12.4725   1
  -1   7 -20 14.5879 12.6077   1
   1   7  20 17.4771 10.3494   5
   1   7  20 17.5680 8.02717   3
   1   7  21 427.857 24.8891   3
   1   7  22 454.573 25.5968   3
  -1   8  23 469.155 31.4586   3
  -1   8  22 39.2294 11.6917   3
  -1   8  21 8.54176 9.40294   3
   1  -8 -20 77.3384 17.9540   1
   1  -8 -20 86.0943 19.8454   2
   1   8 -20 88.5292 17.4425   1
  -1   8  20 98.7395 15.0224   3
   1   8 -19 35.7324 10.4881   3
   1  -8 -19 41.5753 16.5624   2
   1   8 -19 40.6568 14.6569   2
   1   8 -19 44.1488 14.6096   1
   1  -8 -19 30.3966 12.9112   1
   1   8 -19 66.7183 15.4946   6
   1   8 -18 119.986 15.4947   3
   1  -8 -18 130.164 20.1607   2
   1   8 -18 143.511 20.5921   2
   1  -8 -18 116.362 17.3553   1
   1   8 -18 125.442 18.4118   1
   1   8 -18 129.103 18.6561   6
   1   8 -17 825.188 43.1732   6
   1  -8 -17 892.634 49.2677   2
   1   8 -17 890.813 48.5341   2
   1   8 -17 946.078 41.2246   3
   1   8 -17 951.786 45.7780   1
   1  -8 -17 872.973 44.4038   1
   1   8 -16 34.3688 9.62088   3
   1   8 -16 33.9406 12.3731   2
   1  -8 -16 27.9355 11.2419   1
   1   8 -16 46.8763 11.8766   1
   1  -8 -16 34.3625 12.9297   2
   1   8 -16 42.2700 12.2200   5
   1   8 -15 436.119 31.0114   2
   1  -8 -15 475.626 33.4715   2
   1   8 -15 511.619 27.6376   3
   1  -8 -15 436.331 28.8513   1
   1   8 -15 449.180 29.1818   1
   1   8 -15 497.579 29.6904   5
   1   8 -14 37.5037 9.18554   3
   1  -8 -14 57.9653 12.9218   2
   1   8 -14 45.5902 10.8289   1
   1   8 -14 46.6585 11.5803   2
   1  -8 -14 37.8525 10.6867   1
   1   8 -13 139.899 16.9117   2
   1   8 -13 126.940 15.8194   6
   1   8 -13 138.282 14.1582   3
   1  -8 -13 122.919 17.7900   2
   1  -8 -13 140.544 15.6117   1
   1   8 -13 138.841 15.5105   1
   1  -8 -12 707.996 38.2323   2
   1   8 -12 709.668 36.4920   2
   1   8 -12 668.169 34.3987   6
   1   8 -12 698.326 32.5531   3
   1  -8 -12 755.290 34.8144   1
   1   8 -11 1983.03 66.6025   3
   1  -8 -11 2190.67 74.2010   2
   1   8 -11 1998.60 70.3076   2
   1   8 -11 2149.45 70.5482   6
   1   8 -10 108.259 12.7184   2
   1   8 -10 97.6190 12.6976   6
   1   8 -10 75.7850 10.2963   3
   1  -8 -10 78.7555 12.2639   2
   1   8  -9 3177.26 93.8885   3
   1   8  -9 3262.05 96.2780   6
   1   8  -9 3240.55 94.6696   2
   1  -8  -9 3273.58 96.4285   2
  -1   8   8 1713.72 47.5131   5
   1  -8  -8 1925.15 60.2809   2
   1   8  -8 1930.03 59.0865   2
   1   8  -8 1779.60 58.7230   3
   1   8  -8 1773.05 60.1457   6
  -1   8   7 729.982 22.3096   5
   1   8  -7 754.070 32.1500   4
   1   8  -7 766.010 30.1785   2
   1  -8  -7 738.414 30.5828   2
   1   8  -7 773.398 32.3946   3
   1   8  -7 781.666 33.3635   6
   1   8  -6 23.3676 6.26910   4
  -1   8   6 20.4734 2.94965   5
   1   8  -6 25.6862 5.55121   2
   1  -8  -6 21.8113 5.93103   2
   1   8  -6 22.8928 6.06849   3
   1   8  -5 265.768 16.8921   3
   1   8  -5 242.780 13.3190   2
   1  -8  -5 233.648 13.4923   2
   1   8  -5 276.189 16.9656   4
   1   8  -4 1160.81 40.2303   4
   1  -8  -4 1158.88 35.0077   2
   1   8  -4 1225.70 35.0158   2
   1   8  -3 5956.52 146.891   4
   1  -8  -3 5570.17 135.990   6
   1   8  -2 311.579 17.2225   4
  -1  -8   2 304.689 17.5062   4
   1  -8  -2 311.108 12.9574   6
  -1  -8   2 301.683 13.3303   2
  -1   8   2 294.398 13.0736   2
  -1  -8   1 3796.59 100.780   4
   1  -8  -1 3787.86 102.965   4
   1  -8  -1 3664.48 94.0326   6
  -1   8   1 3743.04 91.8551   2
  -1  -8   1 3663.12 91.7711   2
  -1  -8   0 2774.22 72.2130   2
   1  -8   0 2825.60 83.1593   4
  -1  -8   0 3006.22 82.0816   4
   1   8   0 2900.04 72.5777   1
   1  -8   0 3015.17 72.3853   1
   1  -8   0 2894.28 76.8200   6
  -1   8   0 2929.26 72.6488   2
   1   8   1 805.136 24.7473   1
   1  -8   1 840.826 29.3561   6
  -1   8  -1 855.238 29.6376   6
   1  -8   1 846.993 24.7465   1
  -1  -8  -1 832.550 31.7515   4
   1  -8   1 849.301 33.9456   4
  -1   8  -2 137.385 10.6644   6
   1  -8   2 133.374 10.5222   6
   1  -8   2 128.904 12.0289   4
   1  -8   2 136.547 7.79118   1
   1   8   2 138.938 8.04338   1
   1  -8   3 51.7447 5.44253   1
   1   8   3 51.0361 5.46974   1
  -1   8  -3 58.8743 7.73982   6
   1  -8   3 57.5335 7.50642   6
  -1   8  -3 54.2291 6.66720   5
  -1  -8  -4 619.393 23.1362   1
  -1   8  -4 644.457 23.1295   1
  -1   8  -4 610.366 24.5847   5
  -1   8  -4 647.288 27.3646   6
   1  -8   4 637.901 26.9923   6
   1  -8   4 634.872 23.1600   1
   1   8   4 591.616 22.6722   1
  -1  -8  -5 6260.69 159.075   1
  -1   8  -5 6706.02 159.441   1
  -1   8  -5 6596.57 161.486   5
   1  -8   5 6451.83 164.860   6
  -1   8  -5 6421.78 165.225   6
   1   8   5 6109.42 158.773   1
   1  -8   5 6341.01 159.276   1
  -1   8  -6 2511.85 70.3710   1
  -1  -8  -6 2454.35 70.3321   1
  -1   8  -6 2437.60 71.4967   5
   1  -8   6 2628.28 75.8166   6
  -1   8  -6 2526.93 75.5739   6
   1   8   6 2368.08 70.0157   1
  -1   8  -7 1495.77 48.6752   1
  -1  -8  -7 1470.42 48.5068   1
  -1   8  -7 1570.15 50.5912   5
  -1   8  -7 1532.50 53.2385   6
  -1   8  -8 1616.47 52.3558   1
  -1   8  -8 1701.22 54.2157   5
  -1   8  -8 1603.95 51.1797   3
   1   8   8 1582.74 43.4570   6
  -1   8  -8 1600.33 56.4392   6
  -1   8  -9 396.332 21.7656   1
  -1   8  -9 363.180 21.6416   5
  -1   8  -9 399.092 20.0758   3
   1   8   9 392.300 15.0157   6
  -1   8  -9 417.710 24.4436   6
  -1   8 -10 170.170 15.3919   1
  -1  -8 -10 201.939 15.8193   1
  -1   8 -10 175.144 15.2981   5
  -1   8 -10 171.468 13.1191   3
  -1   8 -10 208.765 17.9221   6
   1   8  10 180.131 9.44829   6
  -1  -8 -11 142.017 14.3309   1
  -1   8 -11 161.805 15.2450   1
  -1   8 -11 147.986 14.7528   5
  -1   8 -11 157.043 12.4661   3
   1   8  11 144.867 8.81673   6
  -1   8 -11 156.033 16.5701   6
   1   8  12 589.421 22.1502   6
   1  -8  12 721.257 36.0970   6
  -1   8 -12 639.396 33.7004   6
  -1  -8 -12 687.067 33.2253   1
  -1   8 -12 742.638 34.0208   5
  -1   8 -12 696.498 28.4984   3
  -1   8 -12 637.612 32.4419   1
  -1   8 -13 1117.14 48.5701   6
   1   8  13 1112.65 34.9783   6
  -1  -8 -13 1113.92 46.8376   1
  -1   8 -13 1227.36 41.4977   3
  -1   8 -13 1135.97 47.1916   1
   1   8  13 1057.33 42.7248   5
  -1   8 -13 1175.93 47.3722   5
  -1   8 -14 1147.29 49.6069   6
  -1   8 -14 1126.56 47.7367   5
   1   8  14 1143.61 44.2393   5
  -1   8 -14 1186.60 41.7823   3
  -1  -8 -14 1138.25 48.7768   1
  -1   8 -14 1103.70 48.0223   1
  -1   8 -15-2.64865 9.82388   5
   1   8  15 5.31635 7.50612   5
  -1   8 -15 2.80879 8.46593   1
  -1  -8 -15 12.8293 9.95774   1
  -1   8 -15-3.38379 6.15576   3
   1   8  16 433.303 25.4706   5
  -1   8 -16 363.635 26.8159   5
  -1   8 -16 429.733 22.7035   3
  -1  -8 -16 416.281 29.0864   1
  -1   8 -16 379.963 27.9454   1
  -1   8 -17 10.2074 9.52134   5
  -1  -8 -17 19.1655 10.9232   1
  -1   8 -17 22.0005 12.0948   1
  -1   8 -17 28.5980 8.40387   3
   1   8  17 5.89708 7.98040   5
  -1   8 -18 6.10960 9.96540   5
   1   8  18 3.68349 8.39256   5
  -1   8 -18-3.25104 10.4755   6
  -1   8 -18 0.91794 6.34374   3
  -1   8 -18-8.26764 12.1496   1
  -1  -8 -18-5.04475 11.2358   1
   1   8  19 584.081 32.6345   5
  -1   8 -19 532.142 36.0101   6
  -1   8 -19 549.952 36.8583   1
  -1  -8 -19 580.664 37.5520   1
  -1   8 -20 355.161 30.0338   1
  -1  -8 -20 383.675 30.7731   1
   1   8  20 306.675 24.6390   5
   1   8  20 346.295 22.6267   3
   1   8  21 13.4088 8.14664   3
   1   8  22 330.371 22.1594   3
  -1   9  22 4.45644 9.33110   3
  -1   9  21 191.328 20.6030   3
   1   9 -20 3.51269 12.0064   1
   1   9 -20 8.74653 12.6050   2
   1  -9 -20 11.0759 12.5685   2
   1  -9 -20 8.69947 12.0254   1
   1   9 -19 240.917 21.3700   3
   1  -9 -19 222.848 27.4286   2
   1   9 -19 231.184 26.5197   2
   1  -9 -19 217.873 23.6439   1
   1   9 -19 233.102 24.4359   1
   1   9 -18 874.204 48.5816   2
   1  -9 -18 838.298 48.8752   2
   1   9 -18 918.117 41.4672   3
   1   9 -18 755.681 42.1708   1
   1  -9 -18 822.783 43.9314   1
   1   9 -18 873.662 44.1215   5
   1   9 -17 36.9232 10.4795   3
   1   9 -17 44.7598 13.4529   2
   1  -9 -17 9.90427 11.4361   2
   1  -9 -17 28.8814 10.2945   1
   1   9 -17 21.4280 10.0072   1
   1   9 -17 33.7763 10.8099   5
   1  -9 -16 1208.19 57.4912   2
   1   9 -16 1140.51 54.8533   2
   1   9 -16 1243.26 52.6118   1
   1  -9 -16 1222.71 52.3097   1
   1   9 -16 1195.48 48.6422   3
   1   9 -16 1190.16 51.4457   5
   1   9 -15 698.434 39.6469   2
   1  -9 -15 784.498 42.8567   2
   1   9 -15 707.552 34.5430   3
   1  -9 -15 664.898 36.1108   1
   1   9 -15 657.575 35.9818   1
   1   9 -14 38.4577 9.93751   3
   1   9 -14 63.7989 12.7267   2
   1  -9 -14 53.8449 13.8756   2
   1   9 -14 66.8698 12.5579   1
   1  -9 -14 60.3229 11.6130   1
   1   9 -14 42.8949 11.6037   6
   1   9 -13 5.70202 6.25784   3
   1   9 -13 2.81943 7.18230   2
   1  -9 -13 9.41745 9.59599   2
   1  -9 -13-1.20452 7.36420   1
   1   9 -13 3.61150 7.25710   1
   1   9 -13-1.32838 7.77572   6
   1   9 -12-3.29780 5.92706   3
   1   9 -12-1.26445 7.94231   6
   1  -9 -12 2.23786 7.02829   1
   1   9 -12 7.74779 6.96243   2
   1  -9 -12 1.45121 7.53999   2
   1   9 -12 5.59264 7.11760   1
   1   9 -11 1118.04 46.8215   6
   1   9 -11 1128.00 45.0162   3
   1  -9 -11 1179.95 45.1024   1
   1  -9 -11 1194.37 49.5728   2
   1   9 -11 1175.55 47.2503   2
   1  -9 -10 2968.91 89.7468   2
   1   9 -10 2796.42 86.3818   2
   1   9 -10 2820.60 86.7762   3
   1   9 -10 2783.99 87.9402   6
  -1   9   9 494.704 18.6835   5
   1   9  -9 537.905 26.6545   2
   1  -9  -9 593.176 28.9136   2
   1   9  -9 526.529 27.7339   4
   1   9  -9 562.044 28.1013   3
   1   9  -9 552.209 28.8208   6
  -1   9   8 1166.44 35.0442   5
   1   9  -8 1343.96 45.1233   2
   1  -9  -8 1351.36 46.5763   2
   1   9  -8 1291.46 47.5370   4
   1   9  -8 1305.69 47.6306   3
   1   9  -8 1374.39 49.0979   6
  -1   9   7 1523.63 41.5003   5
   1   9  -7 1601.33 54.4638   4
   1   9  -7 1551.71 54.5400   6
   1   9  -7 1622.55 55.5032   3
   1   9  -7 1656.48 50.7300   2
   1  -9  -7 1615.34 51.2877   2
   1   9  -6 33.9741 7.73727   4
  -1   9   6 23.2153 3.44872   5
   1   9  -6 31.5544 7.76242   6
   1   9  -6 26.0347 7.42257   3
   1  -9  -6 19.6515 5.66119   2
   1   9  -6 29.3134 5.58395   2
   1   9  -5 1377.04 50.5672   3
   1   9  -5 1499.35 44.1735   2
   1  -9  -5 1508.30 44.6969   2
   1   9  -5 1413.89 49.9158   4
   1   9  -4 439.432 23.6489   3
   1   9  -4 466.676 23.6109   4
   1   9  -4 456.326 17.8644   2
   1  -9  -4 454.244 18.0007   2
   1   9  -3 20.0062 6.17320   4
   1  -9  -2 3398.51 87.1376   6
  -1  -9   2 3456.33 96.6406   4
   1  -9  -2 3469.51 98.1020   4
  -1  -9   1 470.431 16.5707   2
  -1   9   1 488.052 16.7330   2
   1  -9  -1 518.053 16.1519   1
   1  -9  -1 487.821 19.3484   6
  -1  -9   1 533.801 24.6734   4
   1  -9  -1 443.725 23.9695   4
  -1   9   0 175.431 8.16764   2
  -1  -9   0 166.487 7.99667   2
  -1  -9   0 170.652 13.3457   4
   1  -9   0 191.000 14.9789   4
   1   9   0 179.734 8.12101   1
   1  -9   0 164.892 7.57724   1
   1  -9   0 178.947 11.3107   6
  -1   9  -1-2.35023 4.27556   6
  -1  -9  -1 3.89952 4.42464   4
   1  -9   1 3.66541 4.47799   4
  -1  -9  -1 0.73510 2.14796   2
  -1   9  -1 1.51397 2.12033   2
   1  -9   1 1.18088 4.16824   6
   1   9   1 0.51243 2.23071   1
   1  -9   1 1.88553 2.21428   1
   1  -9   2 407.705 19.6806   6
  -1   9  -2 440.537 20.2053   6
   1   9   2 361.263 14.3121   1
   1  -9   2 385.783 14.4115   1
  -1  -9  -2 415.618 21.3908   4
   1  -9   2 418.741 23.0274   4
  -1   9  -3 2263.18 66.3675   6
   1  -9   3 2321.31 66.7709   6
   1  -9   3 2191.42 58.9554   1
   1   9   3 2170.58 59.0273   1
   1  -9   3 2272.99 70.6525   4
  -1   9  -4 3143.35 84.0500   5
   1  -9   4 3129.63 87.6549   6
  -1   9  -4 3043.56 87.2821   6
   1  -9   4 3024.41 80.2414   1
   1   9   4 3049.88 80.4679   1
  -1   9  -5 248.568 15.4990   5
   1  -9   5 264.817 17.4021   6
  -1   9  -5 272.577 17.6341   6
  -1   9  -5 248.550 13.5484   1
  -1  -9  -5 261.163 14.0643   1
  -1   9  -6 492.509 23.1725   5
  -1   9  -6 503.984 25.4900   6
   1  -9   6 501.398 25.6869   6
  -1  -9  -6 456.650 21.0257   1
  -1   9  -6 474.186 20.9943   1
  -1   9  -7 308.836 18.4071   5
   1  -9   7 297.109 19.7299   6
  -1   9  -7 293.835 19.9260   6
  -1  -9  -7 287.830 16.6991   1
  -1   9  -7 286.356 16.4248   1
  -1   9  -8 200.194 15.3896   5
   1  -9   8 196.106 16.5677   6
   1   9   8 181.699 8.76748   6
  -1   9  -8 209.553 17.2875   6
  -1   9  -8 193.383 13.8239   1
  -1   9  -9 923.829 37.2925   5
  -1   9  -9 853.349 34.1390   3
  -1   9  -9 850.217 38.7150   6
   1   9   9 881.682 25.7185   6
  -1   9  -9 868.743 34.7473   1
  -1   9 -10 241.794 18.0805   5
  -1   9 -10 248.040 16.4972   3
   1   9  10 227.806 10.2348   6
  -1   9 -10 265.422 20.5559   6
  -1   9 -10 269.817 18.2682   1
  -1  -9 -10 261.786 17.9668   1
  -1   9 -11 961.562 40.1011   5
  -1   9 -11 1001.06 36.6830   3
  -1   9 -11 934.231 42.2459   6
   1   9  11 889.498 27.2553   6
  -1   9 -11 975.934 39.7054   1
  -1  -9 -11 898.116 38.4870   1
  -1   9 -12 2027.33 66.2606   5
  -1  -9 -12 1981.04 65.0078   1
  -1   9 -12 1847.75 63.8786   1
  -1   9 -12 1915.40 59.7057   3
   1   9  12 1739.22 49.5177   6
  -1   9 -12 2042.91 69.2143   6
  -1   9 -13 68.4977 12.6265   5
   1   9  13 67.5793 11.1996   5
  -1   9 -13 65.6466 9.89891   3
  -1   9 -13 87.8835 13.3075   1
  -1  -9 -13 59.7520 11.2271   1
  -1   9 -13 77.0998 14.1187   6
  -1   9 -14 98.5582 14.9066   5
  -1   9 -14 120.280 14.9262   1
  -1  -9 -14 124.159 15.4268   1
  -1   9 -14 106.350 11.9419   3
  -1   9 -14 142.070 17.5761   6
   1   9  14 136.216 14.2476   5
   1   9  15-3.20263 7.61468   5
  -1   9 -15-6.83208 10.2315   5
  -1   9 -15-1.49303 9.00047   6
  -1  -9 -15 2.78957 8.64514   1
  -1   9 -15-1.38333 8.80282   1
  -1   9 -15-4.63294 7.19070   3
  -1   9 -16 189.470 20.4326   1
  -1  -9 -16 157.012 18.9872   1
  -1   9 -16 213.775 21.1399   5
   1   9  16 183.050 17.3186   5
  -1   9 -16 204.258 16.2761   3
  -1   9 -17 1368.43 58.6270   1
  -1  -9 -17 1437.47 59.6340   1
  -1   9 -17 1423.85 50.3357   3
  -1   9 -17 1491.73 59.7403   5
   1   9  17 1364.68 52.9249   5
  -1   9 -18 32.8590 12.3669   5
  -1   9 -18 30.3989 9.76049   3
   1   9  18 18.3205 9.82073   5
  -1  -9 -18 31.3527 12.9314   1
  -1   9 -18 34.2607 12.7854   1
  -1   9 -19 1319.68 47.3107   3
   1   9  19 1104.24 48.2073   5
  -1   9 -19 1204.74 56.1524   1
  -1  -9 -19 1208.52 56.4107   1
   1   9  20 431.925 28.5183   5
  -1   9 -20 433.675 33.2467   1
  -1  -9 -20 447.000 33.5194   1
   1   9  21 3.21071 7.39654   3
   1  10 -20 37.4800 11.5052   3
   1  10 -20 40.3138 15.6146   2
   1  10 -20 36.6415 14.6868   1
   1 -10 -20 36.9744 16.0048   2
   1 -10 -20 39.6340 13.9640   1
   1  10 -19 1292.00 53.6644   3
   1 -10 -19 1296.32 62.9992   2
   1  10 -19 1210.35 59.9960   2
   1 -10 -19 1211.62 55.9557   1
   1  10 -19 1243.40 56.7655   1
   1 -10 -18 140.108 21.9154   2
   1  10 -18 107.391 17.8199   1
   1 -10 -18 161.504 19.4816   1
   1  10 -18 135.832 20.7653   2
   1  10 -18 132.097 16.7023   3
   1  10 -17 181.609 20.4704   5
   1  10 -17 197.126 19.0500   3
   1 -10 -17 206.386 24.2557   2
   1  10 -17 174.744 20.3912   1
   1  10 -17 158.767 20.3231   2
   1 -10 -17 186.556 20.8855   1
   1  10 -16 309.246 25.7440   6
   1 -10 -16 302.906 28.0950   2
   1  10 -16 295.169 25.6252   2
   1  10 -16 319.645 25.0222   5
   1  10 -16 309.618 23.0675   3
   1  10 -16 292.344 24.6127   1
   1 -10 -16 273.759 23.3305   1
   1  10 -15 845.735 42.2380   6
   1  10 -15 861.413 39.6106   3
   1 -10 -15 830.353 40.7563   1
   1  10 -15 804.921 40.3085   1
   1 -10 -15 852.995 45.4281   2
   1  10 -15 825.818 42.9138   2
   1  10 -14 365.809 26.5101   6
   1  10 -14 337.317 23.7075   3
   1  10 -14 368.768 25.1574   1
   1 -10 -14 379.099 25.2165   1
   1 -10 -14 448.199 30.3428   2
   1  10 -14 382.592 26.9082   2
   1  10 -13 1867.63 67.5478   6
   1  10 -13 1832.05 64.6269   3
   1  10 -13 1824.59 64.6720   1
   1 -10 -13 1817.31 64.3359   1
   1 -10 -13 1923.21 70.8069   2
   1  10 -13 1844.66 67.2442   2
   1  10 -12 602.050 32.9236   6
   1  10 -12 593.942 32.0807   2
   1 -10 -12 584.749 33.4989   2
   1  10 -12 606.687 31.1534   3
   1  10 -12 620.392 31.3864   1
   1 -10 -12 616.823 31.0038   1
   1  10 -11 906.238 41.4270   6
   1 -10 -11 968.878 42.8316   2
   1  10 -11 940.073 40.5572   2
   1  10 -11 903.429 41.0977   4
   1  10 -11 939.936 40.4869   3
   1  10 -11 948.742 39.1841   1
   1 -10 -11 925.248 38.6811   1
   1  10 -10 270.655 20.6502   6
  -1  10  10 226.066 11.8904   5
   1  10 -10 276.893 19.0507   2
   1 -10 -10 250.336 19.3796   2
   1  10 -10 232.277 18.9617   4
   1  10 -10 262.046 19.8900   3
   1  10 -10 268.076 18.0693   1
  -1  10   9 1051.99 31.6073   5
   1  10  -9 1081.86 40.8889   2
   1 -10  -9 1177.41 43.6267   2
   1  10  -9 1058.33 43.6871   4
   1  10  -9 1049.30 43.5055   3
   1  10  -9 1079.80 44.2153   6
  -1  10   8 1571.72 43.7609   5
   1 -10  -8 1698.11 54.9045   2
   1  10  -8 1757.60 54.0236   2
   1  10  -8 1614.73 57.5894   4
   1  10  -8 1667.05 58.3334   3
   1  10  -8 1685.37 58.5103   6
   1  10  -7 7430.97 186.302   4
   1  10  -7 7556.40 178.291   2
   1 -10  -7 7416.19 179.095   2
   1  10  -7 7370.16 186.229   3
   1  10  -7 7349.85 185.913   6
   1  10  -6 15.9161 7.24971   4
   1 -10  -6 12.9817 5.20970   2
   1  10  -6 19.0634 5.07943   2
   1  10  -6 21.4363 7.89063   6
   1  10  -6 21.3841 6.97187   3
   1  10  -5 3485.94 102.130   6
   1  10  -5 3448.29 104.084   3
   1 -10  -5 3635.14 94.3613   2
   1  10  -5 3806.34 94.4303   2
   1  10  -5 3610.29 103.808   4
   1  10  -4 1650.11 55.3359   4
   1  10  -4 1586.72 56.2065   3
   1  10  -3 59.4110 9.35782   4
  -1 -10   2 23.9719 6.80446   4
   1 -10  -2 33.3594 8.13552   4
  -1 -10   1 651.795 29.4731   4
   1 -10  -1 591.799 29.7278   4
   1 -10  -1 650.852 18.1898   1
   1  10  -1 614.284 18.6420   1
   1 -10   0 697.101 31.7454   4
  -1 -10   0 701.907 30.3571   4
  -1  10   0 655.367 19.3146   2
  -1 -10   0 588.668 18.7737   2
   1 -10   0 631.974 18.0733   1
   1  10   0 657.442 18.9142   1
   1 -10   0 773.806 26.6715   6
   1 -10   1 5167.23 122.611   6
  -1  10  -1 5284.96 122.859   6
   1 -10   1 5190.75 131.110   4
  -1 -10  -1 5109.41 128.043   4
   1 -10   1 4680.02 111.286   1
   1  10   1 4851.67 111.931   1
  -1  10  -1 4647.18 112.022   2
  -1 -10  -2 443.408 23.6571   4
   1 -10   2 466.703 25.8438   4
   1 -10   2 443.437 15.4717   1
   1  10   2 452.562 15.8277   1
   1 -10   2 500.377 22.5294   6
  -1  10  -2 504.700 22.6736   6
   1 -10   3 3258.08 94.7261   4
  -1  10  -3 2993.26 91.9073   4
  -1  10  -3 3272.53 89.4925   6
   1 -10   3 3177.76 89.2218   6
   1  10   3 3105.22 80.0111   1
   1 -10   4 757.887 31.8339   6
  -1  10  -4 721.684 31.1079   6
  -1  10  -5 93.2224 9.79268   5
   1 -10   5 117.444 12.1582   6
  -1  10  -5 131.472 12.7613   6
  -1  10  -5 106.457 8.70109   1
  -1  10  -6 774.285 31.5324   5
   1 -10   6 833.369 35.4181   6
  -1  10  -6 826.179 34.9023   6
  -1  10  -6 782.690 28.5376   1
  -1 -10  -6 716.250 28.2143   1
  -1  10  -7 545.595 26.3088   5
   1 -10   7 569.611 29.0904   6
  -1  10  -7 545.017 28.4889   6
  -1  10  -7 602.227 24.7930   1
  -1 -10  -7 529.146 23.9911   1
  -1  10  -8 14.4934 7.36361   6
  -1  10  -8 12.9683 6.87299   5
   1  10   8 4.49964 2.77650   6
   1 -10   8 4.63044 6.87946   6
  -1  10  -8 7.41787 5.60745   1
  -1  10  -9 3432.44 96.1010   5
  -1  10  -9 3278.01 93.3018   3
   1  10   9 3169.44 79.0025   6
  -1  10  -9 3392.17 99.6181   6
  -1  10  -9 3269.76 92.1291   1
  -1  10 -10 1217.42 45.2477   5
  -1  10 -10 1178.47 41.9648   3
   1  10  10 1009.57 28.9469   6
  -1  10 -10 1172.00 47.4293   6
  -1 -10 -10 1141.42 42.2222   1
  -1  10 -10 1159.62 42.1073   1
  -1  10 -11 1386.64 49.7940   5
  -1 -10 -11 1381.03 47.7813   1
  -1  10 -11 1312.27 47.0260   1
  -1  10 -11 1389.29 46.0819   3
  -1  10 -11 1403.40 52.9020   6
  -1  10 -12 4.76452 7.07726   5
  -1  10 -12-1.08694 6.82758   1
  -1 -10 -12-1.10679 6.95220   1
  -1  10 -12 8.19758 8.80491   6
  -1  10 -12 5.59486 6.08419   3
  -1  10 -13 167.596 17.8208   5
  -1  10 -13 180.419 15.5486   3
  -1  10 -13 211.122 20.3128   6
  -1  10 -13 199.565 18.0126   1
  -1 -10 -13 164.716 17.2792   1
   1  10  14 432.573 24.6548   5
  -1  10 -14 468.454 29.2169   5
  -1  10 -14 438.275 24.4815   3
  -1  10 -14 481.626 31.0383   6
  -1  10 -14 442.991 27.8613   1
  -1 -10 -14 486.634 28.9695   1
  -1  10 -15 714.358 37.4174   5
   1  10  15 647.552 31.6509   5
  -1  10 -15 682.578 36.4147   1
  -1 -10 -15 649.234 35.3288   1
  -1  10 -15 647.595 30.6392   3
  -1  10 -15 664.565 38.0241   6
   1  10  16 60.7252 11.8878   5
  -1  10 -16 58.7878 13.5554   5
  -1  10 -16 67.7341 11.1412   3
  -1  10 -16 72.4529 13.8479   1
  -1 -10 -16 56.8384 13.1111   1
  -1  10 -16 62.4108 13.9116   6
  -1  10 -17 502.897 27.0516   3
  -1 -10 -17 476.781 32.2982   1
  -1  10 -17 507.796 33.4778   1
   1  10  17 537.169 29.3950   5
  -1  10 -17 518.800 33.3332   5
  -1  10 -18 743.508 34.0353   3
  -1 -10 -18 692.055 39.7344   1
  -1  10 -18 709.013 40.0175   1
   1  10  18 671.820 34.7381   5
  -1  10 -19 89.8033 17.9146   1
  -1 -10 -19 90.4326 18.2878   1
   1  10  19 96.7108 14.2997   5
  -1  10 -19 106.154 13.7351   3
   1  10  20-1.28953 10.3462   5
   1  11 -20 68.2879 14.3166   3
   1 -11 -20 42.3897 15.7645   2
   1 -11 -20 37.5801 14.5038   1
   1  11 -20 36.6864 15.0198   2
   1  11 -20 68.9848 16.9857   1
   1  11 -19 523.563 37.9042   2
   1 -11 -19 627.924 42.3049   2
   1  11 -19 616.448 35.0398   3
   1  11 -19 554.975 36.0859   1
   1 -11 -19 536.527 35.6261   1
   1  11 -18 203.997 20.4484   3
   1  11 -18 176.953 20.6599   1
   1 -11 -18 188.498 24.3255   2
   1 -11 -18 211.555 22.5134   1
   1  11 -18 182.561 22.3524   2
   1  11 -17 138.643 17.2440   3
   1  11 -17 110.448 17.3562   6
   1  11 -17 105.664 17.3091   5
   1 -11 -17 127.676 19.6172   2
   1  11 -17 113.250 17.7067   2
   1 -11 -17 126.880 17.9425   1
   1  11 -17 133.364 17.7645   1
   1  11 -16 143.094 18.4902   5
   1  11 -16 115.648 17.6729   6
   1  11 -16 110.501 15.4103   3
   1  11 -16 150.953 19.2570   2
   1 -11 -16 120.264 18.9496   2
   1  11 -16 99.6304 15.5087   1
   1 -11 -16 112.805 15.7189   1
   1  11 -15 154.976 19.0373   6
   1  11 -15 178.515 19.7761   2
   1 -11 -15 189.752 21.9409   2
   1  11 -15 180.322 18.2341   3
   1  11 -15 140.579 17.6789   1
   1 -11 -15 176.343 18.6904   1
   1  11 -14 200.034 20.5091   6
   1  11 -14 196.039 19.5294   2
   1 -11 -14 170.377 20.5388   2
   1  11 -14 179.923 19.7310   4
   1  11 -14 206.579 19.2941   3
   1  11 -14 206.072 18.9330   1
   1 -11 -14 203.716 18.8130   1
   1  11 -13 72.8347 13.7688   6
   1  11 -13 72.2899 13.4219   4
   1  11 -13 62.0577 12.0583   3
   1 -11 -13 70.6554 14.4452   2
   1  11 -13 64.6464 12.4091   2
   1  11 -13 61.7912 12.1467   1
   1 -11 -13 54.5077 11.2458   1
   1  11 -12 443.911 28.6629   6
   1  11 -12 491.688 29.7971   4
   1 -11 -12 513.335 30.2884   2
   1  11 -12 485.846 27.9241   2
   1  11 -12 474.895 28.0437   3
   1  11 -12 465.184 26.4630   1
   1 -11 -12 446.296 25.9135   1
   1  11 -11 326.962 24.1640   6
   1 -11 -11 368.077 24.5003   2
   1  11 -11 350.192 22.6413   2
   1  11 -11 342.450 24.2021   4
   1  11 -11 417.254 25.6131   3
   1  11 -11 397.858 23.1630   1
   1 -11 -11 380.799 22.6283   1
   1  11 -10 723.987 35.9778   6
   1 -11 -10 804.811 35.6191   2
   1  11 -10 768.930 33.3591   2
   1  11 -10 800.784 36.8925   4
   1  11 -10 844.321 37.7008   3
   1  11 -10 783.221 32.8308   1
   1  11  -9 347.913 23.3502   6
  -1  11   9 356.468 14.3818   5
   1  11  -9 372.626 20.8915   2
   1 -11  -9 384.573 22.3350   2
   1  11  -9 370.389 23.9947   4
   1  11  -9 384.966 24.3931   3
   1  11  -9 393.593 21.0000   1
   1  11  -8 131.841 14.6483   6
  -1  11   8 115.564 7.35874   5
   1 -11  -8 139.353 12.5081   2
   1  11  -8 143.365 11.9037   2
   1  11  -8 144.344 14.6977   4
   1  11  -8 147.844 15.2947   3
   1  11  -8 130.589 11.6758   1
   1 -11  -8 132.323 11.8439   1
   1  11  -7 921.254 39.5689   6
  -1  11   7 888.251 26.7789   5
   1  11  -7 928.963 40.1641   4
   1 -11  -7 982.287 34.0308   1
   1  11  -7 911.240 40.4181   3
   1 -11  -7 1058.72 35.6888   2
   1  11  -7 970.628 33.8526   2
   1 -11  -6 505.523 21.4662   1
   1  11  -6 559.039 28.2344   6
   1  11  -6 538.797 29.1123   3
   1 -11  -6 541.810 22.4616   2
   1  11  -6 528.717 21.5816   2
   1  11  -6 509.294 27.8538   4
   1  11  -5 256.895 17.8808   6
   1  11  -5 200.614 17.1992   3
   1  11  -5 212.615 17.5249   4
   1  11  -5 225.608 11.7895   2
   1  11  -4 33.2815 8.45759   4
   1  11  -4 44.6540 8.75521   6
   1  11  -4 37.9202 8.73714   3
   1  11  -3 473.652 24.0378   6
   1 -11  -3 474.209 27.0686   4
   1 -11  -2 169.737 6.74851   1
   1  11  -2 154.793 7.17272   1
  -1 -11   2 167.484 15.0158   4
   1 -11  -2 200.120 16.9094   4
  -1 -11   1 3245.74 83.4659   4
   1 -11  -1 3096.53 84.8161   4
   1 -11   0 29.4694 8.28100   4
  -1 -11   0 34.5380 7.21875   4
   1 -11   1 1987.31 61.3029   4
  -1 -11  -1 1946.42 58.2386   4
  -1  11  -1 1967.27 52.6669   6
   1 -11   2 59.4286 10.5666   4
  -1 -11  -2 59.6881 9.22987   4
  -1 -11  -2 26.8837 3.41234   2
  -1  11  -2 50.5227 7.98370   6
  -1  11  -2 38.4972 3.66900   2
  -1 -11  -3 295.688 19.7739   4
   1 -11   3 287.479 21.1278   4
  -1  11  -3 298.644 18.0747   6
  -1  11  -4 541.093 29.3785   4
  -1  11  -4 600.641 27.8235   6
  -1  11  -5 133.768 14.5256   4
  -1  11  -5 139.653 13.5686   6
  -1  11  -5 144.523 12.3426   5
  -1  11  -6 94.8554 13.4258   4
  -1  11  -6 124.883 9.66023   1
  -1 -11  -6 101.033 9.38269   1
  -1  11  -6 107.386 12.8508   6
  -1  11  -6 129.924 12.5511   5
  -1  11  -7 3722.42 97.9989   1
  -1 -11  -7 3526.59 97.8773   1
  -1  11  -7 3721.42 106.940   6
  -1  11  -7 3688.93 102.640   5
  -1  11  -8 760.908 28.8781   1
   1  11   8 687.626 19.0933   6
  -1  11  -8 763.944 34.5773   6
  -1  11  -8 758.796 32.1069   5
  -1  11  -9 11.8632 6.97980   3
  -1  11  -9 15.2638 6.18106   1
   1  11   9 3.32202 1.84903   6
  -1  11  -9 1.03428 6.74898   5
  -1  11  -9 12.1159 7.71048   6
  -1  11 -10 84.7775 10.9770   3
  -1  11 -10 93.3247 12.8545   5
  -1  11 -10 89.0716 13.6139   6
  -1 -11 -10 88.9276 11.4146   1
  -1  11 -10 73.9739 10.4570   1
  -1  11 -11 260.163 20.0631   5
  -1  11 -11 241.940 18.0181   3
  -1  11 -11 212.461 17.0183   1
  -1 -11 -11 188.755 16.5161   1
  -1  11 -11 221.435 20.0205   6
  -1  11 -12 810.734 38.1391   5
  -1  11 -12 809.617 34.8565   3
  -1 -11 -12 725.413 34.6942   1
  -1  11 -12 752.850 35.1943   1
  -1  11 -12 850.856 40.9724   6
  -1  11 -13 1203.95 49.2951   5
  -1  11 -13 1122.56 50.6294   6
  -1  11 -13 1141.52 44.4007   3
  -1 -11 -13 1162.02 46.8101   1
  -1  11 -13 1122.19 46.2565   1
   1  11  14 6.10134 7.10574   5
  -1  11 -14 5.46700 9.34381   5
  -1  11 -14 8.40099 7.64352   3
  -1  11 -14 1.52641 9.07079   6
  -1  11 -14 9.93992 8.30380   1
  -1 -11 -14 15.0319 8.65871   1
   1  11  15 876.212 38.4824   5
  -1  11 -15 955.117 44.7953   5
  -1  11 -15 927.424 39.0595   3
  -1  11 -15 964.164 43.3188   1
  -1 -11 -15 934.044 42.9640   1
  -1  11 -15 845.593 44.8141   6
  -1  11 -16 379.719 28.3809   5
   1  11  16 351.065 23.1231   5
  -1  11 -16 317.469 27.6999   6
  -1  11 -16 354.533 23.3060   3
  -1 -11 -16 300.494 24.7622   1
  -1  11 -16 316.322 25.3624   1
  -1  11 -17 5.47690 8.05159   3
  -1  11 -17 15.1083 10.3294   1
  -1 -11 -17 10.5778 8.98085   1
  -1  11 -17 4.71265 11.0918   5
   1  11  17 12.5576 9.01303   5
  -1  11 -18-1.10219 7.36449   3
   1  11  18 5.97581 8.52464   5
  -1  11 -18 3.18755 11.4832   1
  -1 -11 -18-3.18326 12.3511   1
   1  11  19 212.656 19.9995   5
  -1  11 -19 210.790 22.9384   1
  -1 -11 -19 210.866 23.5096   1
   1  11  20 239.193 21.9185   5
   1  11  21 992.042 45.1878   5
   1  12 -20 37.3583 15.2869   2
   1 -12 -20 45.4867 16.7481   2
   1  12 -19 209.059 22.6965   1
   1  12 -19 159.432 19.2041   3
   1 -12 -19 161.550 20.4242   1
   1 -12 -19 168.946 23.3518   2
   1  12 -19 188.108 23.3484   2
   1  12 -18 182.128 22.5887   2
   1 -12 -18 168.929 23.2004   2
   1  12 -18 124.746 18.9336   1
   1 -12 -18 175.100 20.8572   1
   1  12 -18 169.136 19.0386   3
   1  12 -17 554.140 35.7765   2
   1 -12 -17 552.599 37.8706   2
   1  12 -17 567.194 33.4600   3
   1  12 -17 542.536 33.5722   1
   1 -12 -17 520.452 33.3698   1
   1  12 -16 462.465 32.3107   6
   1  12 -16 545.244 34.0618   5
   1  12 -16 515.140 34.5944   4
   1  12 -16 499.168 32.8977   2
   1 -12 -16 416.476 32.7509   2
   1  12 -16 518.933 31.3487   3
   1 -12 -16 485.199 30.8418   1
   1  12 -16 477.896 30.5100   1
   1  12 -15 499.295 32.9284   6
   1  12 -15 471.828 32.3773   4
   1  12 -15 484.574 31.5913   2
   1 -12 -15 493.162 33.4295   2
   1  12 -15 519.838 31.1480   3
   1  12 -15 510.874 30.3600   1
   1 -12 -15 458.979 29.3217   1
   1  12 -14 403.317 28.8959   6
   1  12 -14 383.635 28.2591   4
   1 -12 -14 432.591 30.1884   2
   1  12 -14 405.135 27.4256   2
   1  12 -14 437.095 27.9846   3
   1  12 -14 416.817 26.6313   1
   1 -12 -14 365.742 25.1257   1
   1  12 -13 466.476 30.7204   6
   1  12 -13 491.502 31.4174   4
   1 -12 -13 582.796 33.4112   2
   1  12 -13 476.550 28.7487   2
   1  12 -13 519.439 30.5730   3
   1  12 -13 513.912 28.6726   1
   1 -12 -13 528.066 28.8320   1
   1  12 -12 608.015 34.1654   6
   1  12 -12 604.658 33.9989   4
   1 -12 -12 659.480 34.6288   2
   1  12 -12 608.739 31.3184   2
   1  12 -12 644.997 33.8937   3
   1  12 -12 608.816 30.8001   1
   1 -12 -12 630.411 30.8558   1
   1  12 -11 1272.28 51.6033   6
   1  12 -11 1282.48 47.8986   2
   1 -12 -11 1272.73 49.8725   2
   1  12 -11 1261.77 51.7517   4
   1  12 -11 1184.45 50.1102   3
   1  12 -11 1257.38 46.4788   1
   1 -12 -11 1218.92 45.7641   1
   1  12 -10 79.1141 13.3550   6
  -1  12  10 77.7022 6.94661   5
   1 -12 -10 129.254 14.0600   2
   1  12 -10 96.4940 11.6773   2
   1  12 -10 103.840 14.4532   4
   1  12 -10 95.8959 13.5703   3
   1  12 -10 87.6017 11.1241   1
   1  12  -9 1984.83 68.7943   6
   1 -12  -9 2192.19 65.1927   2
   1  12  -9 2150.21 63.1629   2
   1  12  -9 2061.83 70.0958   4
   1  12  -9 2016.80 69.6579   3
   1  12  -9 2155.94 62.6591   1
   1  12  -8 1339.12 50.9985   6
  -1  12   8 1190.36 35.2251   5
   1  12  -8 1242.60 50.3033   4
   1  12  -8 1345.72 43.5411   1
   1 -12  -8 1288.58 42.8994   1
   1  12  -8 1314.79 51.4959   3
   1 -12  -8 1417.35 45.7034   2
   1  12  -8 1393.75 44.2063   2
   1  12  -7 467.661 20.7704   1
   1 -12  -7 440.405 20.2954   1
   1  12  -7 473.417 26.9664   6
   1  12  -7 475.415 27.7027   4
   1  12  -7 469.974 27.6149   3
   1 -12  -7 513.566 22.3632   2
   1  12  -7 440.675 20.4823   2
   1  12  -6 0.97454 3.51107   2
   1 -12  -6 2.09733 3.74012   2
   1  12  -6 1.15724 6.56543   4
   1  12  -6-1.06342 6.67970   6
   1  12  -6 1.20587 5.63086   3
   1  12  -6 3.04295 4.19847   1
   1 -12  -6 4.86160 4.23268   1
   1  12  -5 946.974 41.4736   4
   1  12  -5 1004.47 40.5511   6
   1  12  -5 1042.54 43.8082   3
   1  12  -5 977.340 30.9897   1
   1 -12  -5 1020.02 30.8955   1
   1 -12  -4 1297.81 52.6421   4
   1  12  -4 1349.49 48.8013   6
   1  12  -4 1418.54 53.1577   3
   1 -12  -4 1356.93 36.8118   1
   1  12  -4 1327.86 37.3300   1
   1  12  -3 3388.23 85.9271   1
   1 -12  -3 3564.53 84.8236   1
   1 -12  -3 3972.77 109.372   4
   1  12  -3 4062.01 102.882   6
  -1 -12   2 33.5406 8.57462   4
   1 -12  -2 50.8305 9.67537   4
   1  12  -2 38.7350 8.32554   6
  -1 -12   1 2445.02 76.9555   4
   1 -12  -1 2335.80 77.9357   4
   1  12  -1 2401.87 71.2579   6
  -1 -12   0 655.172 31.3564   4
   1 -12   0 555.881 30.8260   4
   1  12   0 622.337 26.6105   6
  -1 -12  -1 474.947 26.0263   4
   1 -12   1 430.602 26.5401   4
  -1  12  -1 433.610 21.4178   6
  -1 -12  -2 640.423 31.6250   4
   1 -12   2 673.734 33.9763   4
  -1  12  -2 686.388 28.9605   6
  -1 -12  -3 388.421 23.2319   4
   1 -12   3 401.587 25.0375   4
  -1  12  -3 393.479 21.1294   6
  -1  12  -4 543.242 26.7324   6
  -1 -12  -4 486.228 27.2311   4
  -1  12  -5 5619.56 146.494   5
  -1  12  -5 5766.35 151.313   6
  -1  12  -5 5475.10 155.018   4
  -1  12  -6 501.057 24.8106   5
  -1  12  -6 461.992 26.2200   6
  -1  12  -6 457.803 27.7543   4
  -1  12  -7 1809.81 64.0653   4
  -1  12  -7 1801.70 62.0309   6
  -1  12  -7 1800.03 58.3875   5
  -1  12  -7 1795.97 52.7970   1
  -1 -12  -7 1608.45 52.0525   1
  -1  12  -8 18.2829 7.76501   4
   1  12   8 16.5368 2.31980   6
  -1  12  -8 24.8725 8.70802   6
  -1  12  -8 13.8376 7.93596   5
  -1 -12  -8 18.3241 5.49672   1
  -1  12  -8 11.0594 5.18463   1
   1  12   8 8.86954 2.23306   6
  -1  12  -9 590.586 29.7408   5
  -1  12  -9 510.311 28.0911   3
  -1  12  -9 569.935 25.9929   1
  -1  12  -9 560.760 30.9990   6
  -1  12 -10 1887.40 64.4992   5
  -1  12 -10 1847.62 62.9805   3
  -1  12 -10 1810.59 59.6365   1
  -1 -12 -10 1858.69 60.3376   1
  -1  12 -10 1867.42 66.8042   6
  -1  12 -11 1626.33 57.4742   5
  -1  12 -11 1427.72 53.0730   3
  -1 -12 -11 1474.93 52.3514   1
  -1  12 -11 1414.05 51.4171   1
  -1  12 -11 1483.01 58.1437   6
  -1  12 -12 117.792 14.0927   3
  -1  12 -12 135.212 16.1948   5
  -1  12 -12 127.586 17.4085   6
  -1 -12 -12 122.318 14.1370   1
  -1  12 -12 141.077 15.1185   1
  -1  12 -13 1098.61 46.3831   5
  -1  12 -13 969.609 41.0057   3
  -1  12 -13 927.250 41.0514   1
  -1 -12 -13 932.841 41.4496   1
  -1  12 -13 977.945 46.3460   6
  -1  12 -14 729.414 37.6322   5
   1  12  14 660.255 31.8995   5
  -1  12 -14 686.266 33.4905   3
  -1  12 -14 696.611 34.7233   1
  -1 -12 -14 708.045 35.3466   1
  -1  12 -14 670.949 38.4716   6
   1  12  15 336.385 22.3981   5
  -1  12 -15 338.510 26.9655   5
  -1  12 -15 335.172 27.4722   6
  -1  12 -15 325.307 23.0662   3
  -1 -12 -15 315.658 24.4272   1
  -1  12 -15 344.862 24.9253   1
  -1  12 -16 63.6831 14.4548   5
   1  12  16 49.2546 11.1437   5
  -1  12 -16 31.9837 12.0499   6
  -1 -12 -16 54.5765 12.5538   1
  -1  12 -16 47.3428 12.0821   1
  -1  12 -16 32.1059 9.96618   3
  -1  12 -17 257.343 23.5444   1
  -1 -12 -17 249.095 22.9133   1
   1  12  17 242.862 20.1595   5
  -1  12 -17 242.209 20.0914   3
  -1  12 -18 666.986 38.4616   1
  -1 -12 -18 615.569 36.9675   1
   1  12  18 599.629 32.6556   5
  -1  12 -18 644.066 33.3221   3
   1  12  19 1001.37 44.3918   5
  -1 -12 -19 1010.12 49.9782   1
  -1  12 -19 1061.55 50.9544   1
   1  12  20 11.2503 10.7356   5
   1 -13 -19 20.8481 12.0201   1
   1  13 -19 28.6185 13.1723   1
   1 -13 -19 29.1132 14.4076   2
   1  13 -19 17.9874 12.3067   2
   1  13 -18 12.1427 10.0232   3
   1  13 -18-9.04442 12.3834   1
   1 -13 -18-7.60276 12.1010   1
   1 -13 -18-5.62816 12.3887   2
   1  13 -18-1.71065 11.2965   2
   1 -13 -17 25.7285 10.7111   1
   1  13 -17 16.1993 10.4482   2
   1 -13 -17 5.40930 11.0319   2
   1  13 -17 17.0665 10.5587   1
   1  13 -17 28.5337 10.6103   3
   1  13 -16 127.596 17.5214   2
   1 -13 -16 108.623 18.5464   2
   1  13 -16 162.560 18.6282   3
   1 -13 -16 94.2273 15.5791   1
   1  13 -16 117.903 16.4984   1
   1  13 -15 471.914 32.8731   6
   1  13 -15 508.861 33.7710   4
   1  13 -15 445.846 29.3830   2
   1 -13 -15 481.898 33.2255   2
   1  13 -15 445.667 30.0882   3
   1 -13 -15 466.188 28.8610   1
   1  13 -15 507.173 30.3057   1
   1  13 -14 693.584 38.9352   6
   1  13 -14 697.634 36.2825   2
   1 -13 -14 768.548 39.9474   2
   1  13 -14 654.787 38.5013   4
   1  13 -14 686.730 37.2695   3
   1 -13 -14 701.894 34.7245   1
   1  13 -14 686.408 34.3310   1
   1  13 -13 11.8906 10.1594   6
   1  13 -13-6.12677 9.99339   4
   1  13 -13-4.27822 9.30429   3
   1 -13 -13-5.64070 8.85756   2
   1  13 -13 3.67722 8.09417   2
   1  13 -13 1.08999 7.61417   1
   1 -13 -13 1.08457 7.65644   1
   1  13 -12 713.014 37.9540   6
   1  13 -12 740.632 39.0276   4
   1 -13 -12 739.615 36.3896   2
   1  13 -12 740.672 34.4194   2
   1  13 -12 654.425 36.0927   3
   1 -13 -12 694.836 32.4121   1
   1  13 -12 675.959 32.2491   1
   1  13 -11 562.481 32.6741   6
   1 -13 -11 614.707 31.1495   2
   1  13 -11 610.384 29.5318   2
   1  13 -11 553.875 32.9484   4
   1  13 -11 558.124 32.6819   3
   1  13 -11 575.570 28.0025   1
   1 -13 -11 651.133 29.2334   1
  -1  13  10-1.95373 4.09064   5
   1  13 -10 3.96975 8.20150   6
   1 -13 -10 10.1116 7.21221   2
   1  13 -10 3.53311 5.69219   2
   1  13 -10-1.35616 7.44149   4
   1  13 -10 2.72948 6.81249   3
   1  13 -10-0.82160 5.91969   1
   1  13  -9 623.610 26.4725   1
   1  13  -9 631.638 33.1338   6
  -1  13   9 541.055 19.2967   5
   1  13  -9 689.199 27.9585   2
   1  13  -9 588.718 32.7952   4
   1  13  -9 642.532 34.0934   3
   1 -13  -9 671.657 29.1736   2
   1  13  -8 54.6000 11.2399   6
   1  13  -8 42.6126 10.9752   4
  -1  13   8 42.2364 5.14259   5
   1  13  -8 47.5215 11.2978   3
   1  13  -8 53.4722 8.00686   1
   1 -13  -8 45.0809 7.27122   1
   1  13  -8 38.7460 7.36784   2
   1 -13  -8 35.5870 7.70285   2
   1  13  -7 415.606 18.8736   1
   1 -13  -7 422.386 18.8889   1
   1  13  -7 447.747 27.5517   4
   1  13  -7 415.888 25.9940   6
   1  13  -7 470.728 28.1335   3
   1  13  -7 459.503 19.5358   2
   1 -13  -7 486.027 20.5759   2
   1  13  -6 1373.27 50.6511   6
   1  13  -6 1278.56 52.4667   3
   1 -13  -6 1299.40 38.6079   1
   1  13  -6 1304.28 38.9780   1
   1  13  -6 1331.65 52.4359   4
   1  13  -5 1228.10 46.6460   6
   1  13  -5 1254.39 50.1334   3
   1 -13  -5 1193.53 33.7667   1
   1  13  -5 1179.21 34.1148   1
   1  13  -5 1156.05 48.0762   4
   1  13  -4 514.844 26.3537   6
   1  13  -4 538.387 29.9053   3
   1  13  -4 417.521 14.0586   1
   1 -13  -4 456.389 13.5010   1
   1 -13  -4 523.031 30.4796   4
   1 -13  -3 1063.76 46.6475   4
   1  13  -3 1065.99 41.2886   6
  -1 -13   2 320.457 22.8896   4
   1  13  -2 331.041 20.1847   6
  -1 -13   1 1031.08 43.5829   4
   1 -13  -1 942.122 43.2376   4
   1  13  -1 1041.38 38.4240   6
   1 -13   0 530.777 30.7511   4
  -1 -13   0 544.819 29.8733   4
   1  13   0 543.351 24.8839   6
   1 -13   1 36.3730 8.98993   4
  -1 -13  -1 17.6137 7.58215   4
   1  13   1 15.8713 6.26756   6
  -1  13  -1 20.1078 6.54503   6
   1 -13   2 1268.85 51.2943   4
  -1 -13  -2 1197.71 48.2943   4
   1  13   2 1195.39 39.9447   6
  -1  13  -2 1232.09 43.6116   6
  -1 -13  -3 3914.35 115.626   4
   1  13   3 4040.79 103.798   6
  -1  13  -3 3979.52 110.622   6
  -1 -13  -4 140.970 15.1487   4
   1  13   4 150.721 10.3144   6
  -1  13  -4 153.301 14.8042   6
  -1 -13  -5 336.855 23.2947   4
   1  13   5 349.173 15.0561   6
  -1  13  -5 351.769 22.1038   6
  -1  13  -5 346.680 20.3262   5
  -1  13  -6 136.271 15.6750   4
   1  13   6 118.312 7.54678   6
  -1  13  -6 130.204 14.2837   6
  -1  13  -6 111.090 12.3882   5
  -1  13  -7 129.318 15.7308   4
   1  13   7 134.668 6.71420   6
  -1  13  -7 165.641 16.4493   6
  -1  13  -7 148.219 14.3075   5
  -1  13  -8 1053.68 47.2223   4
  -1  13  -8 1120.94 46.2547   6
  -1  13  -8 1151.12 43.7439   5
  -1  13  -8 1071.11 37.2723   1
  -1 -13  -8 1023.84 37.1115   1
  -1  13  -9 45.3947 11.6283   4
  -1  13  -9 46.9448 10.8321   3
  -1  13  -9 68.0026 12.7344   6
  -1  13  -9 54.0615 11.1961   5
  -1  13  -9 55.0633 8.63171   1
  -1  13 -10 89.3032 15.2253   4
  -1  13 -10 68.5415 12.1493   3
  -1  13 -10 59.1467 12.3571   6
  -1  13 -10 70.3108 12.5136   5
  -1  13 -10 71.6083 10.4128   1
  -1  13 -11 1432.12 53.5517   5
  -1  13 -11 1337.66 54.7049   6
  -1  13 -11 1257.42 50.2151   3
  -1 -13 -11 1255.15 47.3445   1
  -1  13 -11 1333.23 48.0085   1
  -1  13 -12 53.1342 12.0731   5
  -1  13 -12 38.0809 11.5081   6
  -1  13 -12 51.0340 10.6601   3
  -1  13 -12 43.6486 9.42092   1
  -1 -13 -12 37.9322 9.95029   1
  -1  13 -13 17.7791 9.66138   5
  -1  13 -13 15.2660 9.72093   6
  -1  13 -13 21.5738 8.46876   3
  -1  13 -13 17.6915 8.58800   1
  -1 -13 -13 7.92801 8.00348   1
   1  13  14 101.559 13.1189   5
  -1  13 -14 104.899 15.8236   5
  -1  13 -14 74.5999 15.1258   6
  -1  13 -14 64.1529 12.0546   3
  -1 -13 -14 90.2570 13.7546   1
  -1  13 -14 86.0975 13.2687   1
   1  13  15 8.44572 9.06635   5
  -1  13 -15 6.05045 9.37731   5
  -1  13 -15 4.94270 9.49873   6
  -1 -13 -15 7.81721 8.60585   1
  -1  13 -15 12.8582 9.35870   1
  -1  13 -15 12.1745 8.50687   3
   1  13  16 555.364 29.4201   5
  -1 -13 -16 452.173 30.4201   1
  -1  13 -16 517.676 31.7928   1
  -1  13 -16 526.541 30.3125   3
   1  13  17 548.554 30.6936   5
  -1  13 -17 639.249 36.2815   1
  -1 -13 -17 559.247 34.2931   1
  -1  13 -17 545.851 31.5677   3
  -1  13 -18 9.21634 11.5017   1
  -1 -13 -18-1.55174 10.2471   1
   1  13  18 2.33499 9.21489   5
  -1  13 -19 242.787 26.7520   2
  -1 -13 -19 232.015 24.9378   1
  -1  13 -19 221.486 24.1862   1
  -1 -13 -19 198.446 24.1027   2
   1 -14 -19 248.126 26.9282   2
   1 -14 -19 222.334 23.7270   1
   1 -14 -18 442.612 33.9114   2
   1  14 -18 380.275 30.3053   2
   1 -14 -18 442.781 30.7624   1
   1 -14 -17 148.701 20.1270   2
   1  14 -17 120.464 17.8306   2
   1  14 -17 104.433 15.9048   1
   1 -14 -17 127.947 17.4789   1
   1  14 -16 351.732 26.2037   1
   1 -14 -16 380.690 26.9147   1
   1 -14 -16 411.262 30.5486   2
   1  14 -16 293.216 25.5247   2
   1  14 -16 370.598 28.0681   3
   1  14 -15 353.954 25.0677   1
   1 -14 -15 371.856 25.8441   1
   1  14 -15 406.815 29.0559   3
   1 -14 -15 449.038 30.9068   2
   1  14 -15 378.413 26.6231   2
   1 -14 -14 134.191 16.0490   1
   1  14 -14 175.172 20.6536   6
   1  14 -14 157.879 19.7190   4
   1  14 -14 171.250 17.8118   2
   1 -14 -14 161.936 19.6632   2
   1  14 -14 162.321 19.2149   3
   1  14 -14 159.020 17.1212   1
   1  14 -13 748.453 40.3925   6
   1  14 -13 699.885 39.7398   4
   1 -14 -13 793.043 38.3582   2
   1  14 -13 706.622 34.7109   2
   1  14 -13 705.104 38.4499   3
   1 -14 -13 704.742 33.6342   1
   1  14 -13 714.531 33.8400   1
   1  14 -12 906.480 44.9975   6
   1  14 -12 927.702 45.6676   4
   1 -14 -12 1029.51 43.0703   2
   1  14 -12 971.239 40.0236   2
   1  14 -12 1037.07 46.7463   3
   1  14 -12 928.050 38.3759   1
   1 -14 -12 931.006 38.4780   1
   1  14 -11 383.048 27.6476   6
   1  14 -11 367.155 21.9912   2
   1 -14 -11 389.543 24.3112   2
   1  14 -11 369.822 26.9850   4
   1  14 -11 424.052 28.5243   3
   1  14 -11 368.475 21.4643   1
   1 -14 -11 381.204 21.5026   1
   1  14 -10 105.496 15.3692   4
   1  14 -10 130.952 12.4503   2
   1 -14 -10 135.739 13.9983   2
   1  14 -10 124.687 16.4404   3
   1  14 -10 121.011 11.9971   1
   1  14 -10 123.060 16.2597   6
  -1  14  10 88.7360 6.93991   5
   1  14  -9 408.168 19.7876   1
   1 -14  -9 431.231 20.1884   1
  -1  14   9 322.151 13.4301   5
   1  14  -9 418.149 26.8145   6
   1  14  -9 367.231 26.1823   4
   1  14  -9 378.465 26.7249   3
   1 -14  -9 451.570 22.6101   2
   1  14  -9 447.089 21.0823   2
   1  14  -8 685.365 25.5629   1
   1 -14  -8 701.350 25.8109   1
  -1  14   8 583.737 20.0762   5
   1  14  -8 645.531 35.0630   4
   1  14  -8 771.524 36.5723   6
   1  14  -8 670.298 36.4900   3
   1 -14  -8 700.380 27.0743   2
   1  14  -8 671.287 25.8269   2
   1  14  -7 2229.34 75.6441   4
   1  14  -7 2240.07 73.1711   6
   1  14  -7 2284.44 76.9058   3
   1  14  -7 2044.59 58.9652   1
   1 -14  -7 2191.43 59.3035   1
   1  14  -6 106.022 14.7554   4
   1  14  -6 139.686 15.3694   6
   1  14  -6 143.612 16.0149   3
   1  14  -6 96.3618 7.33101   1
   1 -14  -6 108.579 7.54144   1
   1 -14  -5 1184.50 30.6054   1
   1  14  -5 1466.45 50.0315   6
   1  14  -5 1477.36 54.8763   3
   1 -14  -5 1450.36 56.6695   4
   1  14  -4 474.975 29.6211   3
   1 -14  -4 451.643 29.9158   4
   1  14  -4 443.056 25.3208   6
   1  14  -3 78.6186 11.7649   6
   1 -14  -3 114.860 15.4868   4
   1  14  -2 337.496 20.7214   6
   1 -14  -2 345.097 25.3026   4
   1  14  -1 492.472 24.3996   6
  -1 -14   1 467.167 28.2792   4
   1 -14  -1 469.735 29.4153   4
   1  14   0 611.786 27.0424   6
  -1 -14   0 618.831 32.6300   4
   1 -14   0 582.404 33.2908   4
   1  14   1 1683.11 53.3712   6
  -1  14  -1 1792.83 55.4278   6
   1 -14   1 1692.07 64.2116   4
  -1 -14  -1 1662.58 62.0705   4
   1  14   2 244.431 14.9345   6
  -1  14  -2 215.077 16.0477   6
  -1 -14  -2 232.583 19.3310   4
   1 -14   2 283.405 22.6762   4
   1  14   3 563.298 22.8671   6
  -1  14  -3 560.590 27.5654   6
  -1 -14  -3 519.568 29.9283   4
   1  14   4 118.556 9.20279   6
  -1  14  -4 122.079 13.4407   6
  -1 -14  -4 102.984 13.8253   4
  -1  14  -5 65.7947 10.1734   5
  -1  14  -5 60.7585 11.3043   6
  -1  14  -5 55.7711 5.70642   2
  -1 -14  -5 62.9505 12.2383   4
   1  14   5 64.1191 6.64037   6
  -1 -14  -5 42.4402 5.19051   2
  -1  14  -6 1522.89 57.9315   4
  -1  14  -6 1478.37 49.9440   5
  -1  14  -6 1514.66 53.4141   6
   1  14   6 1411.09 37.5218   6
  -1  14  -7 458.066 29.3753   4
  -1 -14  -7 381.697 19.8518   2
  -1  14  -7 471.208 27.3641   6
   1  14   7 416.787 12.7981   6
  -1  14  -7 451.113 24.9638   5
  -1  14  -8 538.952 33.0513   4
  -1  14  -8 573.537 29.5235   5
  -1  14  -8 616.863 32.5966   6
  -1  14  -9 537.607 29.2325   5
  -1  14  -9 487.449 23.0001   1
  -1  14  -9 508.627 32.2453   4
  -1  14  -9 488.634 29.5267   3
  -1  14  -9 525.656 30.8318   6
  -1  14 -10 245.696 20.6041   5
  -1  14 -10 241.241 16.5879   1
  -1  14 -10 232.869 22.2026   4
  -1  14 -10 216.610 19.6370   3
  -1  14 -10 262.060 22.2284   6
  -1  14 -11 80.6577 14.8087   4
  -1 -14 -11 79.4905 11.5823   1
  -1  14 -11 75.5711 10.9912   1
  -1  14 -11 97.9357 15.4434   6
  -1  14 -11 92.5556 14.6305   5
  -1  14 -11 92.6625 14.0049   3
  -1  14 -12 102.900 16.6012   4
  -1  14 -12 98.1774 14.9487   5
  -1 -14 -12 77.4703 11.7904   1
  -1  14 -12 91.6319 12.1739   1
  -1  14 -12 85.4652 14.7954   6
  -1  14 -12 87.8549 13.6362   3
  -1  14 -13 201.324 20.4544   5
  -1  14 -13 170.741 18.3536   3
  -1  14 -13 195.036 21.2323   6
  -1 -14 -13 192.625 17.7142   1
  -1  14 -13 186.148 17.2924   1
  -1  14 -14 1619.76 61.8508   5
  -1  14 -14 1467.06 56.8002   3
  -1  14 -14 1368.91 60.5989   6
  -1 -14 -14 1417.74 55.0159   1
  -1  14 -14 1527.54 56.1492   1
  -1 -14 -15 191.933 19.3521   1
  -1  14 -15 197.475 19.3976   1
  -1  14 -15 178.876 18.5870   3
   1  14  15 169.107 16.7625   5
  -1  14 -15 181.982 20.8533   5
  -1  14 -16 140.769 17.0144   3
  -1 -14 -16 108.366 17.1725   1
  -1  14 -16 139.654 17.4050   1
  -1 -14 -16 83.4893 16.7305   2
   1  14  16 117.078 14.8987   5
  -1  14 -17 73.8309 14.8326   3
   1  14  17 101.066 14.0495   5
  -1 -14 -17 87.7200 16.8381   2
  -1  14 -17 69.4722 15.8564   2
  -1  14 -17 102.165 16.8561   1
  -1 -14 -17 90.5241 16.2292   1
  -1 -14 -18 102.528 19.0179   2
  -1  14 -18 100.867 17.9827   2
  -1 -14 -18 106.450 17.0683   1
  -1 -14 -19 39.2399 14.4169   2
  -1 -14 -19 57.7211 14.8352   1
   1 -15 -19 79.2346 17.4052   2
   1 -15 -18 440.291 33.7346   2
   1 -15 -18 455.233 31.5143   1
   1 -15 -17 120.984 18.4271   2
   1 -15 -17 136.832 17.7103   1
   1 -15 -16 579.680 36.6482   2
   1 -15 -16 575.139 33.6700   1
   1  15 -15 289.575 25.8901   3
   1 -15 -15 276.306 23.2805   1
   1 -15 -15 356.356 27.8223   2
   1  15 -15 290.458 23.2205   2
   1  15 -14 104.013 17.3739   3
   1 -15 -14 106.725 16.5828   2
   1  15 -14 128.518 16.1130   2
   1 -15 -14 96.6632 14.2375   1
   1  15 -14 132.080 15.1813   1
   1  15 -13 44.3306 13.2320   6
   1  15 -13 47.2299 12.7748   4
   1  15 -13 34.9136 8.71278   1
   1 -15 -13 45.6009 10.0354   1
   1  15 -13 27.0339 11.3742   3
   1  15 -13 34.8874 9.52924   2
   1 -15 -13 30.2585 10.7816   2
   1 -15 -12 678.862 31.0990   1
   1  15 -12 648.980 30.3377   1
   1  15 -12 779.594 33.6172   2
   1  15 -12 714.804 39.7889   4
   1  15 -12 707.842 38.7785   6
   1  15 -12 603.465 37.0551   3
   1 -15 -12 787.033 35.7745   2
   1  15 -11 443.275 22.9333   1
   1  15 -11 442.023 30.8827   4
   1  15 -11 486.123 31.4482   6
   1  15 -11 452.139 31.1541   3
   1  15 -11 477.867 24.4044   2
   1 -15 -11 490.296 26.2587   2
   1  15 -10 745.865 30.5256   1
   1  15 -10 830.481 41.0849   6
   1  15 -10 738.862 40.3501   4
   1  15 -10 857.191 42.4834   3
   1  15 -10 859.779 32.6773   2
   1 -15 -10 821.177 33.7600   2
  -1  15   9 53.2563 5.40674   5
   1  15  -9 90.9235 14.5841   6
   1  15  -9 71.8010 8.73331   2
   1 -15  -9 81.2815 10.1285   2
   1  15  -9 74.7487 13.3628   4
   1  15  -9 68.6336 8.79757   1
   1 -15  -9 74.9557 8.73684   1
   1  15  -9 74.3249 13.5616   3
   1  15  -8 387.477 26.3595   6
  -1  15   8 316.799 12.6404   5
   1  15  -8 370.518 26.8604   4
   1  15  -8 396.114 27.9686   3
   1  15  -8 388.250 16.7862   1
   1 -15  -8 359.374 16.3908   1
   1 -15  -7 319.859 13.4475   1
   1  15  -7 353.860 24.3401   6
   1  15  -7 326.214 25.0275   4
   1  15  -7 330.577 25.6031   3
   1  15  -7 315.844 13.6476   1
   1 -15  -6 95.7160 4.86419   1
   1  15  -6 97.0976 5.36771   1
   1  15  -6 123.462 16.4123   3
   1  15  -5 744.958 39.4655   3
   1  15  -5 809.929 36.7228   6
   1  15  -4 792.732 40.2354   3
   1  15  -4 791.691 35.3964   6
   1 -15  -4 705.387 39.7787   4
   1  15  -3 526.210 27.4285   6
   1 -15  -3 526.526 32.4991   4
   1  15  -2 1436.08 50.2986   6
   1 -15  -2 1375.16 57.6640   4
   1  15  -1 1498.87 50.9130   6
  -1 -15   1 1497.75 58.5830   4
   1 -15  -1 1448.89 59.5095   4
   1  15   0 663.646 28.9066   6
   1 -15   0 658.587 36.8251   4
  -1 -15   0 711.031 36.5539   4
   1 -15   1 73.4607 13.1376   4
  -1 -15  -1 74.2546 12.3064   4
   1  15   1 57.5295 8.78218   6
   1  15   2 666.962 26.7023   6
  -1  15  -2 655.549 29.7410   6
  -1 -15  -2 611.164 33.7837   4
   1 -15   2 663.183 37.0045   4
   1  15   3 734.495 27.4723   6
  -1  15  -3 765.034 33.3317   6
  -1 -15  -3 701.070 36.5676   4
   1  15   4 569.283 21.8180   6
  -1  15  -4 550.581 28.8519   6
  -1 -15  -4 557.795 32.2274   4
  -1  15  -5 1.79898 6.48112   5
   1  15   5 0.38439 3.95619   6
  -1  15  -5 13.1989 8.31185   6
  -1 -15  -5 4.19331 8.42618   4
  -1 -15  -6 1061.89 45.4377   4
  -1  15  -6 1164.26 40.6630   5
  -1  15  -6 1205.58 44.0435   6
   1  15   6 1069.49 26.5721   6
  -1  15  -7 1002.03 46.3447   4
  -1  15  -7 885.161 30.3071   2
  -1 -15  -7 822.381 30.1206   2
  -1  15  -7 1046.64 40.1178   5
  -1  15  -7 965.850 41.8059   6
  -1  15  -8 173.543 19.7123   4
  -1  15  -8 144.235 12.3930   2
  -1 -15  -8 151.386 13.0298   2
  -1  15  -8 203.045 17.4899   5
  -1  15  -8 175.777 18.2966   6
  -1  15  -9 25.7535 10.3766   6
  -1  15  -9 63.1596 12.3049   5
  -1  15  -9 56.2317 13.1570   4
  -1  15  -9 47.7323 11.4120   3
  -1 -15  -9 31.5743 8.39128   2
  -1  15  -9 37.9168 8.26028   2
  -1  15 -10 324.151 23.8814   5
  -1  15 -10 277.609 19.4347   2
  -1 -15 -10 274.220 20.0208   2
  -1  15 -10 344.399 27.2200   4
  -1  15 -10 311.986 24.3033   3
  -1  15 -10 331.395 25.5782   6
  -1  15 -11 136.214 17.0306   3
  -1  15 -11 191.955 19.7853   5
  -1  15 -11 131.323 17.2568   6
  -1  15 -11 134.215 14.7908   2
  -1  15 -11 172.872 20.7375   4
  -1 -15 -11 120.378 15.3662   2
  -1 -15 -11 129.524 13.4232   1
  -1  15 -11 159.444 14.2232   1
  -1  15 -12 488.423 32.5716   6
  -1  15 -12 544.042 31.6356   5
  -1 -15 -12 413.734 27.4314   2
  -1  15 -12 491.855 28.0844   2
  -1  15 -12 572.302 35.9741   4
  -1  15 -12 456.841 30.1036   3
  -1  15 -12 502.966 26.3298   1
  -1 -15 -12 430.580 25.4767   1
  -1  15 -13 160.944 18.8866   5
  -1  15 -13 121.208 17.9696   6
  -1 -15 -13 140.110 16.8951   2
  -1  15 -13 132.918 16.3083   2
  -1  15 -13 161.558 18.3388   3
  -1  15 -13 129.916 14.5747   1
  -1 -15 -13 192.853 17.4404   1
  -1  15 -14 203.825 20.0568   2
  -1 -15 -14 175.630 20.0915   2
  -1  15 -14 219.920 19.0518   1
  -1 -15 -14 233.622 19.7509   1
  -1  15 -14 253.537 22.1064   3
  -1  15 -14 292.697 24.6985   5
  -1  15 -15 255.376 23.0490   2
  -1 -15 -15 250.619 23.4294   2
  -1  15 -15 285.659 23.5799   3
  -1 -15 -15 249.344 21.3861   1
   1  15  15 269.745 20.4395   5
  -1  15 -16 101.412 15.6116   3
  -1 -15 -16 64.7162 14.8718   2
  -1 -15 -16 93.7128 15.1053   1
  -1 -15 -17 3.31142 10.9335   2
  -1 -15 -17-4.21784 13.8894   1
  -1 -15 -18 93.1384 17.1721   2
   1 -16 -16 291.835 25.2707   2
   1 -16 -15 75.5001 14.5118   2
   1 -16 -15 80.4841 13.1272   1
   1 -16 -14 171.646 18.5999   2
   1 -16 -14 170.280 16.4435   1
   1 -16 -13-1.82218 6.82192   1
   1 -16 -13 3.45469 9.01287   2
   1 -16 -12 194.892 16.1866   1
   1  16 -12 231.698 22.5970   6
   1  16 -12 191.226 21.2842   4
   1  16 -12 200.406 21.8168   3
   1  16 -12 221.275 16.8009   2
   1 -16 -12 223.178 18.6337   2
   1  16 -11 54.5943 13.5960   6
   1  16 -11 62.2118 13.6355   4
   1  16 -11 35.3761 7.51306   1
   1 -16 -11 42.6168 9.22114   2
   1  16 -11 46.4552 8.30900   2
   1  16 -11 37.6762 11.7264   3
   1  16 -10 161.232 12.1498   1
   1  16 -10 185.188 20.2908   6
   1 -16 -10 143.270 11.7226   1
   1  16 -10 165.424 19.4543   4
   1  16 -10 214.189 22.2592   3
   1  16 -10 174.551 12.8804   2
   1  16  -9 96.5315 15.1276   6
  -1  16   9 69.0137 5.34471   5
   1 -16  -9 85.6705 8.53419   1
   1  16  -9 88.0391 14.8744   4
   1  16  -9 88.1949 15.0844   3
   1  16  -9 89.2450 8.44656   1
   1  16  -8 103.315 16.5502   3
   1  16  -8 88.6398 15.2212   4
   1 -16  -8 80.3138 6.88509   1
   1  16  -8 77.7356 6.75951   1
  -1  16   8 86.3663 5.84010   5
   1  16  -8 109.998 15.7633   6
   1  16  -7 9.53471 2.09571   1
   1  16  -7 15.4054 8.87443   6
   1  16  -6 37.9837 11.7546   3
   1  16  -6 18.3558 8.83610   6
   1  16  -5 17.2503 10.1156   3
   1  16  -5 20.8753 9.53734   6
   1  16  -4 650.966 32.4408   6
   1  16  -4 686.222 38.3395   3
   1  16  -3 70.1102 11.5244   6
   1  16  -2 28.8728 8.34737   6
  -1 -16   1 19.3917 10.5393   4
   1  16  -1 18.7354 7.67216   6
   1  16   0 214.015 15.7034   6
  -1 -16   0 198.463 19.9344   4
   1 -16   0 166.755 20.4484   4
   1 -16   1-1.60656 10.0953   4
  -1 -16  -1 14.7080 8.99672   4
   1  16   1 19.3165 6.94436   6
   1  16   2 607.695 25.6804   6
  -1 -16  -2 659.650 35.8632   4
   1 -16   2 603.939 36.6333   4
  -1  16  -3 248.895 19.1136   6
   1  16   3 285.247 15.5316   6
  -1 -16  -3 289.866 23.2927   4
  -1 -16  -4 588.221 34.2403   4
   1  16   4 601.083 22.7770   6
  -1  16  -4 600.704 30.4059   6
  -1  16  -4 631.743 28.4924   5
  -1 -16  -5 7.45348 9.72597   4
  -1  16  -5-0.92691 7.37660   5
   1  16   5 2.99105 3.57393   6
  -1  16  -5-3.38971 8.69223   6
  -1 -16  -6 108.890 16.3355   4
  -1  16  -6 107.891 13.4762   5
  -1  16  -6 138.890 15.7556   6
   1  16   6 96.7058 6.46976   6
  -1 -16  -7 15.4409 8.76027   4
  -1  16  -7-1.26489 7.94529   6
  -1  16  -7 4.19591 7.99883   5
  -1  16  -7 1.99779 3.30366   2
  -1 -16  -7 2.98148 2.98437   2
  -1  16  -8-1.32749 8.22825   6
  -1  16  -8 3.35808 7.65163   5
  -1 -16  -8 4.67243 5.26416   2
  -1  16  -8-3.22612 8.54092   4
  -1  16  -8 8.51119 4.92042   2
  -1  16  -9 25.0648 11.3681   6
  -1  16  -9 21.5541 10.3000   5
  -1  16  -9 22.9729 10.7243   4
  -1  16  -9 35.0508 13.0731   3
  -1 -16  -9 25.4425 7.91331   2
  -1  16  -9 32.6766 7.56193   2
  -1  16 -10 2707.05 81.5329   5
  -1 -16 -10 2136.67 70.1725   2
  -1  16 -10 2240.41 69.8441   2
  -1  16 -10 2527.37 87.1853   4
  -1  16 -10 2367.41 81.9361   3
  -1  16 -10 2554.02 83.5565   6
  -1  16 -11 48.4581 12.3840   6
  -1  16 -11 50.0911 12.2771   5
  -1  16 -11 37.8359 12.0873   3
  -1  16 -11 47.4198 10.0757   2
  -1 -16 -11 36.7393 9.32618   2
  -1  16 -12 639.377 34.8527   5
  -1  16 -12 575.658 29.5772   2
  -1  16 -12 570.684 34.0568   3
  -1  16 -12 590.487 36.2144   6
  -1 -16 -13 37.5763 9.28033   1
  -1 -16 -13 43.8009 11.3319   2
  -1  16 -13 46.6621 12.6410   3
  -1  16 -13 34.6794 11.9060   5
  -1 -16 -14 87.9852 13.0904   1
  -1  16 -14 80.1324 14.1306   3
  -1 -16 -14 77.4770 13.4453   2
  -1 -16 -15 5.87515 8.46610   1
  -1 -16 -15 1.40578 10.0269   2
  -1  16 -15-11.6558 11.3062   3
  -1 -16 -16 205.536 21.6554   2
   1 -17 -13 21.6659 9.26481   2
   1 -17 -12 319.440 20.6686   2
   1  17 -11 297.994 25.6053   6
   1  17 -10 514.337 33.1894   6
   1  17 -10 511.296 34.1298   4
   1  17 -10 563.725 36.2115   3
   1 -17 -10 503.770 20.2861   1
   1  17  -9 35.5120 12.3487   3
   1  17  -9 48.5582 13.2347   4
   1 -17  -9 44.7566 5.47752   1
   1  17  -9 56.2463 13.5879   6
   1  17  -8 509.114 34.5263   3
   1  17  -8 522.243 31.9635   6
   1  17  -7 168.988 20.9911   3
   1  17  -7 182.182 19.2126   6
   1  17  -6 268.158 24.5909   3
   1  17  -6 257.477 21.6427   6
   1  17  -5 417.789 30.9046   3
   1  17  -5 465.563 27.7571   6
   1  17  -4 518.276 34.5521   3
   1  17  -4 567.224 30.0618   6
   1  17  -3 305.425 21.2984   6
   1  17  -2 554.222 28.2346   6
   1  17  -1 598.214 28.7171   6
  -1 -17   1 592.790 35.7307   4
   1  17   0 591.448 27.4828   6
  -1 -17   0 588.969 35.4485   4
   1  17   1 110.956 11.6342   6
  -1 -17  -1 109.664 16.0040   4
   1  17   2 1224.42 40.5649   6
  -1 -17  -2 1125.02 51.9271   4
  -1 -17  -3 525.420 33.5333   4
  -1  17  -3 594.542 29.8432   6
   1  17   3 623.994 24.3337   6
  -1  17  -3 575.832 26.8630   5
  -1 -17  -4 441.970 30.3734   4
  -1  17  -4 416.347 25.8909   6
   1  17   4 503.357 19.8538   6
  -1  17  -4 460.877 24.6372   5
  -1 -17  -5-1.58651 10.8449   4
  -1  17  -5 12.2946 8.00565   5
  -1  17  -5 5.80606 8.36744   6
   1  17   5 5.03305 3.99790   6
  -1 -17  -6 283.924 25.6411   4
   1  17   6 311.671 11.0627   6
  -1  17  -6 331.087 24.0241   6
  -1  17  -6 317.524 21.2480   5
  -1 -17  -7 690.101 39.7503   4
  -1  17  -7 677.914 35.9664   6
  -1  17  -7 690.563 33.2998   5
  -1 -17  -8 276.485 25.9767   4
  -1  17  -8 309.277 24.7075   6
  -1  17  -8 348.018 23.7872   5
  -1 -17  -9-1.73870 5.51417   2
  -1  17  -9 6.22803 9.77984   3
  -1 -17  -9-1.68700 12.7481   4
  -1  17  -9-2.44193 8.97128   5
  -1  17  -9 1.42792 9.42927   6
  -1  17 -10 663.330 36.5313   6
  -1  17 -10 618.629 36.1983   3
  -1  17 -10 673.043 34.2442   5
  -1 -17 -11 200.236 16.3134   2
  -1  17 -11 262.394 24.3186   6
  -1  17 -11 256.746 22.6453   5
  -1  17 -11 247.696 23.6274   3
  -1 -17 -12 288.079 20.5903   2
  -1  17 -12 288.570 25.5742   3
  -1  17 -12 346.359 26.4649   5
  -1 -17 -13 105.156 13.9820   2
  -1  17 -13 118.904 18.1850   3
  -1  17 -14 249.644 24.0325   3
   1  18 -10 82.9095 16.0668   6
   1  18  -9 177.451 20.2308   6
   1  18  -8 590.983 34.6827   6
   1  18  -7 787.836 39.7940   6
   1  18  -6 17.6685 10.9541   3
   1  18  -6 7.73838 8.81960   6
   1  18  -5 239.167 24.5655   3
   1  18  -5 297.053 22.7886   6
   1  18  -4 236.975 24.7030   3
   1  18  -4 314.783 22.9796   6
   1  18  -3 6.49321 7.87496   6
   1  18  -3-10.5259 12.6399   3
   1  18  -2 147.226 15.5069   6
   1  18  -1 76.4543 11.6120   6
  -1 -18   0 711.459 41.5234   4
   1  18   0 839.969 33.6547   6
  -1 -18  -1 223.667 23.2728   4
   1  18   1 238.299 16.3017   6
  -1 -18  -2 99.3193 17.2460   4
  -1  18  -2 110.315 12.5302   5
   1  18   2 132.955 12.0564   6
  -1 -18  -3 212.100 23.3174   4
  -1  18  -3 194.759 16.4467   5
   1  18   3 213.522 13.8067   6
  -1 -18  -4 19.9905 12.5048   4
  -1  18  -4 44.1817 9.76315   5
   1  18   4 48.3926 6.95970   6
  -1  18  -4 25.5293 9.50373   6
  -1 -18  -5-11.7299 12.4311   4
  -1  18  -5 10.5509 8.17805   5
  -1  18  -5 17.8052 10.0477   6
  -1 -18  -6 795.526 44.0191   4
  -1  18  -6 841.130 37.0654   5
  -1  18  -6 920.394 41.5588   6
  -1 -18  -7-20.5510 15.4129   4
  -1  18  -7-3.28831 8.72521   5
  -1  18  -7-6.64672 9.95560   6
  -1 -18  -8 429.172 32.4998   4
  -1  18  -8 421.456 26.9820   5
  -1  18  -8 451.720 32.0778   3
  -1  18  -8 410.979 28.9663   6
  -1  18  -9 14.8928 11.1887   3
  -1  18  -9 13.5256 9.79049   5
  -1  18  -9 21.9126 11.1434   6
  -1 -18  -9 3.52877 13.2149   4
  -1  18 -10-13.2486 13.7089   3
  -1  18 -10 3.04919 9.94712   6
  -1  18 -10 7.75545 10.0304   5
  -1  18 -11 80.9767 15.6080   5
   1  19  -8 162.799 19.6650   6
   1  19  -7 262.873 23.3159   6
   1  19  -6 324.900 25.1537   6
   1  19  -5 345.134 24.9510   6
   1  19  -4 531.406 30.3629   6
   1  19  -3 96.5556 14.1379   6
   1  19  -2 551.622 28.9386   6
   1  19  -1 181.656 16.3876   6
   1  19   0 177.235 15.7725   6
  -1 -19   0 154.174 22.0875   4
  -1  19  -1 5.85270 6.32668   5
   1  19   1 8.42065 6.75640   6
  -1 -19  -1-1.75617 13.9766   4
  -1  19  -2 413.036 22.6682   5
  -1 -19  -2 412.438 31.9632   4
  -1  19  -3 827.285 34.6879   5
  -1 -19  -3 873.020 47.0362   4
  -1  19  -4 234.675 18.2010   5
  -1 -19  -4 217.308 24.5158   4
  -1  19  -5 56.3845 11.2495   5
  -1 -19  -5 22.9510 13.4972   4
  -1  19  -6 365.236 26.0382   6
  -1  19  -6 297.543 22.3112   5
  -1  19  -7 158.659 18.7840   6
  -1  19  -7 136.099 15.8561   5
  -1  19  -8 492.707 32.0196   6
  -1  19  -8 478.191 29.0399   5
  -1  19  -9 169.527 18.7115   5
  -1  19  -9 127.399 18.3854   6
  -1  19 -10 64.6399 13.6428   5
   1  20  -7 96.2315 16.2280   6
   1  20  -6 7.96731 9.85194   6
   1  20  -5 296.717 23.9373   6
   1  20  -4 545.686 31.1110   6
   1  20  -3 698.799 34.5497   6
   1  20  -2 29.8606 9.40902   6
   2   0 -24 359.515 27.1855   6
  -2   0  23-4.83371 12.8225   3
   2   0 -23 3.97583 9.45266   6
   2   0 -22 1.49470 11.1918   5
  -2   0  22-1.54925 9.20476   3
   2   0 -22 3.87959 9.03367   6
   2   0 -21 1.42040 9.49091   5
   2   0 -21 1.26466 8.64460   6
  -2   0  21-10.4156 11.6458   3
   2   0 -20 2173.26 76.0956   5
   2   0 -20 2002.17 90.0634   2
  -2   0  20 2179.86 76.0656   3
   2   0 -20 2111.38 72.4275   6
   2   0 -19-1.19775 8.09558   6
   2   0 -19-2.57437 8.60060   5
  -2   0  19 8.19725 7.75092   3
   2   0 -19 4.86472 12.1419   2
   2   0 -18 3539.32 106.660   5
   2   0 -18 3682.31 127.020   2
  -2   0  18 3548.74 108.552   3
   2   0 -18 3519.76 105.773   6
   2   0 -17-3.41451 7.33583   6
   2   0 -17 6.82408 8.35781   5
  -2   0  17 12.6382 7.28571   3
   2   0 -17 13.2438 12.1125   2
   2   0 -16 344.067 30.6880   2
  -2   0  16 320.232 23.0838   3
   2   0 -16 311.181 21.6941   5
   2   0 -16 321.783 22.1554   6
   2   0 -15 5.98991 7.40598   5
   2   0 -15 3.21583 7.48853   6
  -2   0  15 6.98889 6.60877   3
   2   0 -15-5.79412 9.43834   2
   2   0 -14 3457.68 114.809   2
   2   0 -14 3486.97 101.282   6
  -2   0  14 3318.87 101.718   3
   2   0 -14 3607.00 100.129   5
   2   0 -13 1.65835 8.10407   2
   2   0 -13 1.71956 6.13282   5
  -2   0  13 5.30644 6.66647   3
  -2   0  12 7772.92 199.558   3
   2   0 -12 7653.25 209.817   2
  -2   0  11 5.76024 5.53461   3
   2   0 -11 2.77681 6.63632   2
   2   0 -10 699.415 35.3237   2
   2   0  -9-1.14598 5.22212   2
   2   0  -8 7.28194 5.99847   2
  -2   0   7-1.51913 4.64376   3
   2   0  -7 4.71892 5.35434   2
  -2   0   6 10648.8 256.923   3
   2   0  -6 10329.4 260.303   2
  -2   0   5-0.65235 4.04324   3
   2   0  -5 0.81646 4.55662   2
  -2   0   4 8312.40 205.067   3
   2   0  -4 8417.03 208.480   2
  -2   0   3 0.54088 3.48561   3
  -2   0   2 5.32934 3.82584   3
  -2   0   1 0.42756 3.26016   3
  -2   0   0 284.321 12.8097   3
  -2   0  -1 0.63064 2.50942   3
  -2   0  -2 10936.9 256.273   3
   2   0   2 10886.3 265.556   1
  -2   0  -3-0.20947 1.82367   3
   2   0   3 5.46602 5.11597   1
   2   0   4 5144.04 136.020   1
  -2   0  -4 5224.50 122.776   3
   2   0   5 2.27550 4.70145   1
   2   0   6 0.83475 5.17380   1
   2   0   7-1.80327 4.94754   1
   2   0   7-1.41879 4.08910   6
   2   0   8 39.8677 8.20992   1
   2   0   8 32.4088 6.29074   6
   2   0   9 0.83428 5.30879   5
   2   0   9-3.13660 6.48021   1
   2   0   9 0.80170 4.62103   6
   2   0  10 5247.54 142.994   5
  -2   0 -10 5511.51 149.703   1
   2   0  10 5346.47 142.709   6
   2   0  10 5547.08 148.873   1
   2   0  11 2.90104 6.30939   5
   2   0  11-2.47700 7.35858   1
   2   0  11 3.65436 6.03310   6
  -2   0 -11 6.31974 6.69226   1
   2   0  12 2033.85 68.1328   5
  -2   0 -12 2086.21 73.9664   1
   2   0  12 2138.12 67.8040   6
   2   0  12 2245.02 74.6629   1
   2   0  13 5.43642 6.91952   5
   2   0  13 8.64011 7.90234   1
  -2   0 -13 12.9812 8.05045   1
   2   0  13-3.07275 6.92362   6
   2   0  14 4.62349 9.29210   1
   2   0  14 16.1989 7.38381   6
   2   0  14 9.29792 7.76779   5
  -2   0 -14 1.53757 7.83557   1
   2   0  15-2.28447 7.45250   6
   2   0  15-1.22516 7.06191   5
  -2   0 -15-1.62986 9.82510   1
   2   0  16 1584.47 59.7630   5
   2   0  16 1647.97 59.3516   6
  -2   0 -16 1633.71 66.9378   1
   2   0  17 6.76723 9.94948   5
   2   0  17 24.3003 10.6715   6
  -2   0 -17 10.8747 9.77709   1
   2   0  18 562.463 32.9996   5
   2   0  18 550.418 32.3785   6
  -2   0 -18 593.167 38.4986   1
   2   0  19 11.3955 9.73870   6
  -2   0 -19 5.85154 11.9266   1
   2   0  20 22.3259 10.9482   6
   2  -1 -24 159.502 18.4784   6
  -2   1  23 567.441 35.5977   3
   2  -1 -23 576.910 33.0947   6
   2   1 -23 577.666 35.0849   6
  -2  -1  22 83.2150 15.0334   3
  -2   1  22 55.6909 13.0611   3
   2   1 -22 48.2275 12.3866   6
   2  -1 -22 52.0961 11.9736   6
   2   1 -22 47.2661 14.2117   5
  -2  -1  21 31.2002 11.5709   3
  -2   1  21 43.0947 12.7962   3
   2   1 -21 60.4157 13.1580   6
   2  -1 -21 37.8617 10.4171   6
   2   1 -21 36.6763 12.5451   5
   2  -1 -21 55.1590 13.4396   5
   2  -1 -20 13.7783 8.19166   6
   2   1 -20 5.23342 8.94485   6
   2   1 -20 5.54564 9.89040   5
   2  -1 -20 9.12880 9.39795   5
  -2  -1  20 9.98376 8.96043   3
  -2   1  20 5.71645 8.73904   3
   2   1 -20 2.51896 13.5828   2
   2  -1 -19 584.359 32.4463   5
   2   1 -19 653.922 34.6451   5
   2   1 -19 609.740 43.8557   2
  -2  -1  19 529.800 32.3214   3
  -2   1  19 591.983 33.9685   3
   2   1 -19 626.930 33.8495   6
   2  -1 -19 596.566 31.0490   6
   2   1 -18 8.69795 8.58835   6
   2  -1 -18-1.09023 6.93899   6
   2  -1 -18 1.17695 8.13500   5
   2   1 -18-1.24175 8.48892   5
  -2  -1  18 15.7466 6.81934   3
  -2   1  18 9.29122 7.02910   3
   2   1 -18 11.4546 12.5715   2
   2   1 -17 1510.82 56.6597   5
   2  -1 -17 1517.41 55.3675   5
   2   1 -17 1547.42 70.5155   2
  -2  -1  17 1506.16 57.3364   3
  -2   1  17 1412.58 56.3474   3
   2   1 -17 1545.19 57.1216   6
   2  -1 -17 1532.44 54.7239   6
   2   1 -16 93.0379 12.9636   6
   2   1 -16 78.1448 12.1356   5
   2  -1 -16 93.7427 12.3545   6
   2  -1 -16 94.6062 12.6844   5
  -2   1  16 78.8294 11.8237   3
  -2  -1  16 81.9084 12.1864   3
   2   1 -16 83.8992 18.2841   2
   2   1 -15 2413.81 88.5210   2
   2  -1 -15 2374.24 72.4380   5
   2   1 -15 2282.44 72.9940   5
  -2  -1  15 2242.95 74.3956   3
  -2   1  15 2179.99 74.0494   3
   2   1 -15 2251.50 74.3215   6
   2  -1 -15 2173.07 71.5098   6
   2   1 -14 233.731 23.3366   2
   2  -1 -14 195.597 15.7793   5
   2   1 -14 211.669 16.8873   5
  -2   1  14 228.163 17.9032   3
  -2  -1  14 218.233 17.7386   3
   2  -1 -14 217.499 16.9029   6
   2   1 -14 200.341 17.1401   6
  -2   1  13 1445.15 54.0572   3
  -2  -1  13 1460.95 54.4593   3
   2  -1 -13 1536.97 51.1550   5
  -2   1  12 60.7328 9.72762   3
  -2  -1  12 63.4506 9.77730   3
   2   1 -12 66.0697 12.7909   2
   2   1 -11 1031.89 46.7863   2
  -2   1  11 1100.87 42.2191   3
  -2  -1  11 1069.58 42.0794   3
   2   1 -10 11.2619 7.32898   2
   2   1  -9 2760.10 81.4987   2
   2  -1  -9 2238.13 78.1677   2
   2   1  -8 147.832 14.0711   2
   2  -1  -8 134.779 14.1331   2
   2   1  -7 4196.90 114.734   2
  -2   1   7 4199.13 111.353   3
  -2  -1   7 4333.44 111.675   3
   2   1  -6 1695.50 54.2150   2
  -2   1   6 1641.44 51.0418   3
  -2  -1   6 1651.14 51.1595   3
   2   1  -5 2507.63 73.3193   2
  -2   1   5 2515.81 70.0620   3
  -2  -1   5 2461.41 69.7150   3
  -2   1   4 936.363 32.4107   3
   2  -1  -4 846.060 33.2397   2
   2   1  -4 900.818 33.9305   2
  -2  -1   4 901.148 32.0174   3
  -2  -1   3 675.444 25.5000   3
  -2  -1   2 1283.29 39.5435   3
  -2  -1   1 7594.92 183.925   3
   2  -1   0 2038.62 52.0597   4
  -2  -1   0 2175.35 56.2353   3
   2   1   0 2050.55 55.7085   3
   2   1   1 24.4650 3.91819   3
  -2  -1  -1 29.1139 4.14125   3
  -2   1  -2 1119.04 30.4440   4
  -2  -1  -2 1093.17 30.9750   3
   2   1   2 1063.31 30.6674   3
   2   1   2 1091.69 37.7171   1
  -2   1  -2 1054.55 30.6272   3
   2   1   3 351.508 12.6998   3
  -2  -1  -3 384.668 13.0374   3
   2   1   3 366.871 19.1464   1
  -2   1  -3 369.333 12.7066   3
  -2   1  -4 566.831 16.0672   3
   2   1   4 540.594 16.3447   3
   2   1   4 561.082 25.3419   1
   2   1   5 3813.32 103.719   1
   2   1   6 1167.75 42.1733   1
   2  -1   6 1170.99 40.4251   6
   2   1   7 4402.04 121.135   1
   2  -1   7 4492.62 118.478   6
   2   1   8 2491.55 75.8238   1
   2   1   8 2411.36 71.1207   6
   2  -1   8 2429.92 72.4830   6
  -2   1  -9 1408.65 51.1616   1
   2  -1   9 1349.35 46.8573   6
   2   1   9 1323.98 45.2885   6
   2   1   9 1351.23 49.5984   1
   2  -1   9 1222.21 45.4827   5
  -2   1 -10 1273.57 50.2043   1
   2  -1  10 1285.74 46.1507   6
   2   1  10 1270.12 45.0730   6
   2   1  10 1352.62 50.3951   1
   2  -1  10 1256.72 45.8878   5
   2   1  10 1244.99 45.9119   5
  -2   1 -11 194.732 17.7927   1
   2  -1  11 217.281 16.6228   6
   2   1  11 223.759 16.1796   6
   2   1  11 219.363 18.8833   1
   2  -1  11 231.899 17.2596   5
   2   1  11 217.875 16.7693   5
  -2   1 -12 2395.81 80.1114   1
   2   1  12 2217.22 71.4720   6
   2  -1  12 2376.75 74.0522   6
   2   1  12 2540.85 80.7714   1
   2  -1  12 2284.02 73.8379   5
   2   1  12 2307.88 74.1168   5
  -2   1 -13 4545.01 134.600   1
   2  -1  13 4589.65 128.000   6
   2   1  13 4528.14 125.812   6
   2   1  13 4795.53 135.926   1
   2  -1  13 4580.31 128.475   5
   2   1  13 4539.22 127.808   5
  -2   1 -14 1037.43 46.8089   1
   2  -1  14 870.912 39.3070   6
   2   1  14 877.318 38.5468   6
   2   1  14 986.475 46.3163   1
   2  -1  14 968.225 41.1763   5
   2   1  14 889.826 39.8469   5
   2  -1  15 398.475 25.6238   6
   2   1  15 435.589 25.5428   6
  -2   1 -15 402.196 29.2402   1
   2   1  15 460.183 27.3472   5
   2  -1  15 410.812 25.7738   5
   2  -1  16 765.613 37.0104   6
   2   1  16 718.777 34.9539   6
  -2   1 -16 730.204 41.3454   1
   2   1  16 742.169 36.8716   5
   2  -1  16 789.738 37.8269   5
   2   1  17 1136.86 46.6944   6
   2  -1  17 1206.54 49.3386   6
  -2   1 -17 1085.99 53.4941   1
   2   1  17 1140.63 48.5107   5
   2  -1  17 1103.52 48.2155   5
   2   1  18 534.055 30.6449   6
   2  -1  18 519.405 31.7325   6
  -2   1 -18 517.833 36.9988   1
   2   1  18 501.980 30.6896   5
   2   1  19 9.56206 9.54566   6
   2  -1  19 17.7883 10.3582   6
  -2   1 -19 1.95379 14.0794   1
   2   1  19 14.7290 10.5087   5
   2  -1  20 368.170 28.5914   6
   2   1  20 337.115 26.1799   6
   2  -2 -24 322.227 24.3885   6
   2  -2 -23 11.7914 9.07118   6
  -2  -2  23 1.59433 12.5837   3
  -2   2  23-6.43253 12.5864   3
   2  -2 -22 1343.69 52.9018   6
   2   2 -22 1462.34 58.9273   6
  -2   2  22 1365.02 58.9186   3
  -2  -2  22 1526.59 60.9543   3
   2   2 -22 1397.10 60.0991   5
   2   2 -21 77.1341 15.2643   5
  -2  -2  21 53.0575 13.4324   3
  -2   2  21 70.7601 13.7179   3
   2   2 -21 73.8415 13.8847   6
   2  -2 -21 59.5066 11.6039   6
   2   2 -20 195.407 26.2028   2
   2   2 -20 162.497 19.0136   5
   2   2 -20 137.253 17.3958   6
   2  -2 -20 177.620 16.7898   6
  -2  -2  20 156.012 17.9541   3
  -2   2  20 144.724 17.4542   3
   2  -2 -19 27.2186 10.3248   5
   2   2 -19 20.0943 10.8554   5
  -2   2  19 15.1921 9.03621   3
  -2  -2  19 50.5952 10.5412   3
   2   2 -19 25.6599 10.7690   6
   2  -2 -19 44.4161 10.2267   6
   2   2 -19 26.0231 12.9988   2
   2  -2 -18 44.6187 10.6639   5
  -2   2  18 51.6685 11.5123   3
  -2  -2  18 55.2382 10.8655   3
   2   2 -18 42.6892 14.8814   2
   2   2 -18 70.9441 13.3021   6
   2   2 -18 34.5503 11.1997   5
   2  -2 -18 55.1388 10.8238   6
   2   2 -17 114.951 20.0433   2
   2  -2 -17 116.971 13.2372   6
   2   2 -17 104.682 14.9371   6
   2   2 -17 94.7622 13.2980   5
   2  -2 -17 112.062 13.7373   5
  -2  -2  17 126.283 14.6682   3
  -2   2  17 115.298 14.3134   3
   2   2 -16 2975.95 105.857   2
   2   2 -16 3060.82 93.3279   6
   2  -2 -16 2907.28 87.1590   6
  -2  -2  16 2834.98 91.3350   3
  -2   2  16 2831.03 91.2512   3
   2  -2 -16 3022.50 88.6910   5
   2   2 -16 2946.43 90.4990   5
   2   2 -15 304.467 27.5022   2
   2   2 -15 314.084 22.3423   6
   2  -2 -15 312.100 19.8067   6
  -2   2  15 306.851 21.7713   3
  -2  -2  15 300.436 21.4072   3
   2  -2 -15 295.450 19.5794   5
   2   2 -15 299.082 20.6428   5
   2   2 -14 3283.12 112.044   2
   2   2 -14 3548.34 102.396   6
   2  -2 -14 3375.58 96.7602   6
  -2   2  14 3322.00 100.793   3
  -2  -2  14 3287.98 100.665   3
   2  -2 -14 3507.64 96.5956   5
   2   2 -13 93.4160 15.0470   2
   2  -2 -13 67.1242 9.60310   5
  -2   2  13 66.2532 10.7470   3
  -2  -2  13 81.1686 11.2790   3
  -2   2  12 27.6241 7.90819   3
  -2  -2  12 34.7812 8.04337   3
   2   2 -12 41.4396 10.0326   2
  -2  -2  11 153.256 13.9366   3
  -2   2  11 160.182 14.4328   3
   2   2 -11 141.965 15.9728   2
   2   2 -10 3047.94 95.4451   2
   2   2  -9 1822.77 63.5152   2
  -2   2   8 8293.83 212.256   2
   2   2  -8 7994.76 209.013   2
  -2  -2   7 7.01902 4.56899   3
  -2   2   7 9.46420 6.77943   2
   2   2  -7 9.32885 5.03349   2
   2   2  -6 940.283 36.7560   2
  -2   2   6 976.161 38.5196   2
  -2  -2   6 872.955 34.0767   3
  -2   2   5 492.120 24.5119   2
   2   2  -5 486.463 23.8561   2
  -2  -2   5 455.189 21.7459   3
  -2  -2   4 29.2609 5.52890   3
  -2   2   4 25.3167 6.51225   2
   2   2  -4 26.2127 6.28245   2
  -2   2   3 120.500 10.6241   2
  -2  -2   3 101.929 8.95373   3
  -2   2   2 17597.9 419.276   2
  -2  -2   2 17751.8 416.993   3
  -2  -2   1 1668.69 48.0266   3
   2   2   0 12837.2 298.050   3
  -2  -2   0 12740.0 298.121   3
   2  -2   0 12307.2 295.003   4
  -2  -2  -1 46.5336 5.22128   3
   2   2   1 44.0260 5.20534   3
  -2  -2  -2 570.625 19.1525   3
   2   2   2 541.305 18.9666   3
  -2   2  -2 551.819 19.0907   4
   2   2   2 551.497 24.1379   1
   2   2   3 2398.40 61.4339   3
  -2   2  -3 2394.73 63.4259   4
   2   2   3 2424.87 69.7644   1
   2   2   4 908.281 26.1723   3
   2   2   4 940.942 34.3248   1
   2   2   5 2761.25 69.1002   3
   2  -2   5 2865.41 79.1376   6
  -2   2  -5 2836.02 82.1620   1
   2   2   5 2917.36 80.9677   1
   2  -2   6 7855.22 189.771   6
  -2   2  -6 7435.03 194.112   1
   2   2   6 7392.08 176.530   3
   2   2   6 7971.22 192.526   1
   2   2   7 17.2121 6.60231   1
  -2   2  -7 20.8870 7.37671   1
   2   2   7 15.0327 2.16582   3
   2  -2   7 20.7081 5.91172   6
   2   2   8 1978.57 54.5232   6
   2  -2   8 1995.80 57.2362   6
   2   2   8 2133.20 60.9718   1
  -2   2  -8 2192.00 62.3553   1
   2   2   9 282.267 19.4702   1
   2   2   9 233.015 15.5000   6
   2  -2   9 265.866 17.6124   6
  -2   2  -9 246.519 19.2123   1
   2  -2  10 128.594 13.0821   6
   2   2  10 152.772 12.7765   6
  -2   2 -10 138.897 15.1733   1
   2   2  11 546.600 27.8657   5
   2   2  11 578.986 31.1898   1
   2   2  11 543.731 26.0186   6
   2  -2  11 558.918 28.0520   6
  -2   2 -11 595.838 31.6974   1
   2   2  12 1211.45 47.1070   5
   2  -2  12 1222.16 47.6221   5
   2   2  12 1333.07 52.8249   1
   2   2  12 1276.51 45.8660   6
   2  -2  12 1326.82 48.9591   6
  -2   2 -12 1280.72 52.2561   1
   2  -2  13 648.803 31.8253   5
   2   2  13 611.932 31.2970   5
   2   2  13 660.773 35.8769   1
   2  -2  13 671.029 32.5110   6
   2   2  13 586.522 28.8422   6
  -2   2 -13 680.872 36.0904   1
   2  -2  14 2379.62 77.2534   6
   2   2  14 2281.02 73.1753   6
   2   2  14 2282.25 75.7477   5
   2  -2  14 2434.23 77.4382   5
  -2   2 -14 2396.93 82.9295   1
   2   2  15 10.8867 8.72538   5
  -2   2 -15 17.6997 9.13805   1
   2  -2  15 33.9008 9.23505   6
   2   2  15 7.28636 7.43604   6
   2  -2  15 24.8075 7.59463   5
  -2   2 -16 1.68798 9.42460   1
   2  -2  16 3.96488 8.41443   6
   2   2  16 19.2616 9.43926   5
   2   2  16 24.2672 8.99583   6
  -2   2 -17 132.570 18.2184   1
   2   2  17 106.209 15.6195   5
   2   2  17 109.618 14.2255   6
   2  -2  17 139.467 17.0367   6
  -2   2 -18-1.84722 10.6475   1
   2  -2  18 1.47732 9.40072   6
   2   2  18-1.23438 8.53068   6
   2   2  18-5.57079 10.5242   5
  -2   2 -19 368.039 30.6599   1
   2  -2  19 404.022 28.9434   6
   2   2  19 321.085 24.8711   6
   2   2  19 333.027 26.3226   5
   2  -2  20 575.609 35.8079   6
   2   2  20 567.797 32.8464   6
   2   2  20 526.431 33.6253   5
  -2  -3  23 1.58807 11.6693   3
  -2   3  23 8.09373 10.4324   3
   2  -3 -23 5.54367 8.22545   6
  -2  -3  22 6.11582 9.85356   3
  -2   3  22 1.57142 9.74007   3
   2   3 -22 4.59643 10.4730   6
   2  -3 -22 4.29433 8.61402   6
   2   3 -21 508.546 32.6753   5
  -2  -3  21 449.125 30.7928   3
  -2   3  21 501.297 32.1696   3
   2  -3 -21 469.361 26.9212   6
   2   3 -21 493.773 31.9127   6
   2   3 -20 4.37020 9.84676   6
   2  -3 -20 3.96250 7.48696   6
   2  -3 -20 12.4090 13.8515   2
   2   3 -20 8.60333 9.69237   5
  -2   3  20-1.44513 9.19668   3
  -2  -3  20 4.25227 9.47160   3
   2   3 -20 21.7923 12.8208   2
   2   3 -19 2607.78 100.928   2
   2  -3 -19 2554.11 100.920   2
  -2   3  19 2571.87 86.0271   3
  -2  -3  19 2555.00 85.3060   3
   2   3 -19 2557.83 85.9485   5
   2   3 -19 2656.15 87.1331   6
   2  -3 -19 2500.75 78.0724   6
   2  -3 -18 47.8072 15.7518   2
   2   3 -18 35.1062 13.8036   2
   2   3 -18 44.0897 11.8549   6
   2  -3 -18 29.5701 7.97169   6
   2   3 -18 31.2975 10.8228   5
  -2  -3  18 36.6903 10.5419   3
  -2   3  18 26.6183 10.2679   3
   2   3 -17 105.719 15.1714   6
   2  -3 -17 116.627 13.4346   5
   2   3 -17 115.154 15.0064   5
   2  -3 -17 123.549 12.7217   6
   2   3 -17 128.829 19.8134   2
   2  -3 -17 103.892 19.5338   2
  -2   3  17 116.553 15.2275   3
  -2  -3  17 114.821 14.5040   3
   2  -3 -16 90.9683 11.5893   6
   2   3 -16 83.9289 13.2534   5
   2  -3 -16 102.214 12.5051   5
   2   3 -16 114.827 15.8882   6
   2  -3 -16 88.0169 18.1990   2
  -2   3  16 97.3617 13.7068   3
  -2  -3  16 96.1239 12.8379   3
   2   3 -16 115.711 18.6651   2
   2   3 -15 607.760 38.2616   2
   2  -3 -15 576.949 38.6662   2
   2   3 -15 692.658 34.3278   6
   2  -3 -15 607.062 27.9392   6
  -2   3  15 579.329 31.4137   3
  -2  -3  15 616.922 32.0578   3
   2  -3 -15 605.399 28.3151   5
   2  -3 -14 300.652 18.4500   5
   2   3 -14 381.859 24.2396   6
   2   3 -14 329.860 26.9323   2
  -2   3  14 323.992 22.0214   3
  -2  -3  14 298.501 21.3017   3
   2   3 -13 3035.85 98.8549   2
  -2   3  13 2885.07 88.9258   3
  -2  -3  13 2828.66 88.7294   3
   2   3 -12 319.994 24.6799   2
  -2  -3  12 331.822 21.2985   3
  -2   3  12 290.299 20.2145   3
   2   3 -11 6048.00 168.460   2
   2  -3 -11 6112.39 153.681   5
  -2  -3  11 6136.39 161.935   3
   2   3 -11 6075.10 160.705   3
   2   3 -10 454.466 27.5146   2
   2  -3 -10 443.587 19.6051   5
   2   3 -10 493.996 24.8306   3
   2   3  -9 17.7677 7.26035   2
   2   3  -9 22.6416 6.59720   3
   2   3  -8 70.5404 8.70759   3
   2   3  -8 81.9600 11.0077   2
  -2   3   8 87.2055 12.1123   2
   2   3  -7 6.48488 5.58550   2
  -2   3   7 2.08489 5.72102   2
  -2  -3   7 4.86574 5.16139   3
  -2   3   6 789.226 34.0225   2
   2   3  -6 758.166 32.4896   2
  -2  -3   6 763.818 30.7492   3
  -2   3   5 9502.86 241.921   2
   2   3  -5 9931.92 241.723   2
  -2  -3   5 9749.60 239.064   3
  -2   3   4 1863.94 57.1595   2
   2   3  -4 1833.68 56.5025   2
  -2  -3   4 1801.24 55.2198   3
  -2  -3   3 2949.78 80.0725   3
  -2   3   3 2892.69 81.2254   2
  -2  -3   2 659.041 25.2430   3
  -2   3   2 647.197 26.0666   2
   2   3  -2 649.397 19.7237   4
   2   3  -1 420.839 13.0014   4
  -2  -3   1 417.009 18.2511   3
   2  -3   0 310.904 14.2684   4
   2   3   0 349.671 15.4988   3
  -2  -3   0 349.755 15.5797   3
  -2  -3  -1 1841.29 46.3659   4
   2  -3   1 1891.36 52.0071   4
   2   3   1 1937.74 52.3367   3
  -2  -3  -1 1926.97 52.2989   3
  -2   3  -2 1397.17 40.5796   4
   2   3   2 1307.38 44.5584   1
   2   3   2 1405.95 39.8321   3
  -2   3  -3 7661.10 182.719   4
   2   3   3 7362.87 179.788   3
   2   3   3 7571.60 187.852   1
   2  -3   4 144.201 10.1618   5
   2   3   4 159.864 12.3268   1
  -2   3  -4 124.370 9.53827   4
   2   3   4 134.325 7.86621   3
   2  -3   4 136.633 11.3004   6
   2  -3   5-0.58547 4.08989   5
  -2   3  -5 4.86031 5.28520   1
   2   3   5 5.33519 5.09264   1
   2   3   5 0.29013 2.42002   3
   2  -3   5 2.79178 4.55379   6
   2  -3   6 1038.26 36.8541   5
   2  -3   6 1162.85 39.7207   6
  -2   3  -6 1141.84 41.2505   1
   2   3   6 1049.50 30.2973   3
   2   3   6 1084.50 40.2128   1
  -2   3  -7 10.3479 5.17070   1
   2   3   7 12.6757 5.61979   1
   2   3   7 13.0636 2.66504   3
  -2   3  -7 13.4904 2.40167   3
   2  -3   7 16.1072 5.86812   6
   2  -3   8 318.325 18.9828   6
   2   3   8 363.610 21.0990   1
  -2   3  -8 313.545 20.5363   1
   2  -3   9 4833.13 114.946   6
   2   3   9 4609.20 109.004   6
  -2   3  -9 4756.23 118.085   1
   2   3   9 4729.25 116.887   1
  -2   3 -10 84.2599 12.1055   1
   2   3  10 108.018 12.7570   1
   2   3  10 89.3000 9.89431   6
   2  -3  10 86.2449 11.2348   6
  -2   3 -11 1945.86 68.4201   1
   2   3  11 1927.62 60.8671   6
   2  -3  11 1957.36 64.8749   6
   2   3  11 1969.95 68.3878   1
   2   3  12 407.001 21.5989   6
   2  -3  12 388.669 23.7323   6
  -2   3 -12 403.199 26.9444   1
   2   3  12 422.899 24.0677   5
   2   3  12 363.537 13.2516   3
   2   3  12 462.324 27.9935   1
   2  -3  13 1129.35 45.1193   6
   2   3  13 1076.95 40.3010   6
  -2   3 -13 1195.99 49.6746   1
  -2  -3 -13 1119.79 48.3992   1
   2   3  13 1194.39 44.9003   5
   2   3  13 1177.91 49.5109   1
   2   3  14 837.863 37.5737   5
   2  -3  14 908.057 39.7581   6
   2   3  14 817.973 34.6019   6
   2   3  14 773.778 23.6268   3
  -2   3 -14 817.540 41.5488   1
  -2  -3 -14 815.851 41.4367   1
   2   3  15 4.84680 7.71486   5
   2   3  15 9.75613 3.27784   3
  -2   3 -15 28.5251 9.41914   1
  -2  -3 -15 23.9268 9.48086   1
   2   3  15 13.8821 7.36023   6
   2  -3  15 5.23082 7.77404   6
   2  -3  16 349.312 25.1675   6
   2   3  16 327.414 21.6738   6
   2   3  16 287.997 11.9091   3
  -2  -3 -16 360.742 28.2693   1
  -2   3 -16 334.418 27.5298   1
   2   3  16 340.851 23.6945   5
   2  -3  17 2144.63 71.2439   6
   2   3  17 2051.74 64.5888   6
  -2  -3 -17 2170.26 76.9123   1
  -2   3 -17 1922.72 73.5842   1
   2   3  17 2027.62 68.2071   5
   2  -3  18 685.828 37.5899   6
   2   3  18 692.903 33.0918   6
  -2  -3 -18 691.947 40.8302   1
  -2   3 -18 646.377 40.0452   1
   2   3  18 688.772 35.3000   5
  -2   3 -19 182.190 23.2191   1
  -2  -3 -19 192.678 23.3942   1
   2   3  19 214.562 21.3342   5
   2  -3  19 208.394 21.9540   6
   2   3  19 241.470 20.6596   6
   2   3  20 246.051 23.8667   5
   2  -3  20 257.663 25.3669   6
   2   3  20 251.101 22.1373   6
  -2   4  23 48.7907 13.9102   3
  -2  -4  23 55.7979 13.9244   3
   2  -4 -23 44.8571 11.1034   6
  -2   4  22 56.3651 13.7989   3
  -2  -4  22 44.3992 13.3150   3
   2  -4 -22 84.1191 12.4549   6
   2   4 -21 117.714 18.0047   5
  -2  -4  21 113.518 16.9150   3
  -2   4  21 120.381 16.9826   3
   2   4 -21 133.852 18.2554   6
   2  -4 -21 86.8939 12.5025   6
   2   4 -20 576.607 34.1017   5
   2  -4 -20 520.529 27.0128   6
   2   4 -20 502.854 32.5571   6
   2  -4 -20 570.233 42.7767   2
   2   4 -20 545.066 41.5308   2
  -2  -4  20 531.310 32.4547   3
  -2   4  20 507.978 31.9625   3
   2   4 -20 501.933 37.5144   1
   2  -4 -20 493.378 36.5718   1
   2  -4 -19 220.762 27.4495   2
   2   4 -19 246.720 27.7726   2
   2   4 -19 255.775 22.6938   5
  -2   4  19 232.929 21.8535   3
  -2  -4  19 241.790 21.4049   3
   2   4 -19 296.351 24.9010   6
   2  -4 -19 239.874 17.8264   6
   2   4 -18 743.614 46.6217   2
   2  -4 -18 671.345 45.7392   2
   2   4 -18 791.961 38.8408   5
  -2  -4  18 805.983 39.2707   3
  -2   4  18 779.832 39.0123   3
   2   4 -18 855.370 41.4590   6
   2  -4 -18 769.850 32.7121   6
  -2  -4  17 59.7450 11.9107   3
  -2   4  17 81.7645 13.5184   3
   2  -4 -17 70.5639 16.3848   2
   2   4 -17 81.3845 17.2967   2
   2  -4 -17 61.5253 9.64959   6
   2   4 -17 77.4163 12.7076   5
   2   4 -17 78.0636 13.7930   6
   2   4 -16 74.5983 15.9076   2
   2  -4 -16 76.9970 15.7980   2
   2  -4 -16 71.0090 9.59754   6
   2   4 -16 73.0296 13.0900   6
  -2  -4  16 53.9749 11.1448   3
  -2   4  16 60.2651 11.6150   3
   2  -4 -15 138.923 19.6285   2
   2   4 -15 93.6153 16.3699   2
   2  -4 -15 107.215 11.6821   5
   2   4 -15 101.939 14.5939   6
  -2   4  15 92.8386 13.0968   3
  -2  -4  15 96.0946 13.0063   3
   2   4 -14 134.392 15.4063   6
  -2  -4  14 106.304 12.9030   3
  -2   4  14 93.8037 12.7423   3
   2  -4 -14 144.050 19.0012   2
   2   4 -14 95.3198 15.8210   2
  -2  -4  13 1346.77 51.8921   3
   2   4 -13 1374.29 51.4550   3
   2   4 -13 1408.78 58.9086   2
   2  -4 -13 1489.50 61.0585   2
   2  -4 -12 1703.59 52.1445   5
   2  -4 -12 1757.69 67.0142   2
   2   4 -12 1712.45 65.3840   2
  -2  -4  12 1742.80 60.2805   3
   2   4 -12 1736.22 59.4638   3
   2  -4 -11 30.6752 5.75008   5
   2  -4 -11 27.9078 10.2669   2
   2   4 -11 15.7647 7.22856   2
   2   4 -11 14.7951 6.29927   3
  -2  -4  11 30.5028 8.30549   3
   2   4 -10 469.053 24.8567   3
   2   4 -10 474.996 27.9192   2
   2  -4 -10 481.113 28.5959   2
   2  -4 -10 483.853 19.5901   5
   2   4  -9 1.09354 6.10350   2
   2  -4  -9 11.4729 7.48580   2
   2  -4  -9 2.08587 3.70655   5
   2   4  -9 5.35353 5.60497   3
   2   4  -8 524.204 25.3384   3
   2   4  -8 535.404 27.3142   2
  -2   4   8 530.924 29.2543   2
   2  -4  -8 504.690 27.0645   2
   2  -4  -8 541.115 19.0963   5
  -2  -4   7 494.335 25.2218   3
   2   4  -7 585.794 27.6031   2
  -2   4   7 540.127 27.8506   2
   2  -4  -7 598.887 28.0650   2
  -2  -4   6 1439.02 50.7119   3
   2  -4  -6 1551.96 52.4590   2
   2   4  -6 1600.22 52.4573   2
  -2   4   6 1588.07 54.3127   2
  -2  -4   6 1623.54 54.2256   2
   2   4  -5 75.5942 9.29519   2
  -2  -4   5 81.2010 9.22528   3
  -2  -4   5 67.7162 9.00432   2
  -2   4   5 76.6057 9.84315   2
   2  -4  -5 61.3272 8.43829   2
  -2  -4   4 5301.13 136.900   2
  -2   4   4 5323.26 137.370   2
   2  -4  -4 5349.87 136.233   2
   2   4  -4 5257.18 136.298   2
  -2  -4   4 5075.91 135.521   3
  -2   4   3 1.34380 4.43706   2
  -2  -4   3 1.33163 4.34421   2
  -2  -4   3 2.58988 4.06705   3
   2   4  -2 206.546 9.72144   4
  -2   4   2 220.784 13.7363   2
  -2  -4   2 205.314 13.3700   2
  -2  -4   2 220.894 13.4227   3
   2  -4  -1 401.043 17.8000   4
  -2   4   1 415.096 19.0947   2
  -2  -4   1 418.053 19.1355   2
  -2  -4   1 436.236 19.2693   3
   2   4   0 155.884 10.4369   3
   2  -4   0 156.982 10.3727   4
   2   4   1 4352.72 108.486   3
  -2  -4  -1 4207.73 103.222   4
   2  -4   1 4305.39 109.248   4
  -2   4  -2 4881.27 120.155   4
   2  -4   2 4821.07 123.819   1
   2   4   2 4560.90 123.222   1
   2   4   2 4638.37 118.213   3
   2  -4   2 4767.70 117.624   5
  -2   4  -3 947.436 32.3506   4
   2  -4   3 915.452 34.4276   1
   2   4   3 994.901 35.3022   1
   2   4   3 954.183 30.1623   3
   2  -4   3 953.676 31.0783   5
  -2   4  -4 4016.73 104.437   4
   2  -4   4 3830.73 105.936   1
   2   4   4 4078.92 107.145   1
   2   4   4 3858.38 99.9344   3
   2  -4   4 4203.38 103.696   5
  -2   4  -5 558.291 23.4308   4
  -2   4  -5 558.466 25.7047   1
   2   4   5 565.580 25.2478   1
  -2  -4  -5 555.055 25.5700   1
   2  -4   5 578.511 25.3379   1
   2   4   5 533.563 19.4779   3
   2  -4   5 501.353 22.1007   5
  -2   4  -6 1863.78 59.6325   1
   2  -4   6 1877.17 58.6202   6
   2  -4   6 1809.69 55.5337   5
   2  -4   6 1845.87 58.7406   1
   2   4   6 1856.13 59.0431   1
  -2   4  -7 3183.15 90.7619   1
   2  -4   7 3018.15 88.4759   6
   2   4   7 3021.98 89.1100   1
   2  -4   7 3192.32 89.9389   1
   2  -4   7 3034.76 86.0198   5
   2  -4   8 81.1002 9.78191   5
   2  -4   8 97.9947 11.0127   6
  -2   4  -8 78.5547 5.55395   3
   2   4   8 99.7281 11.8347   1
   2  -4   8 70.0299 10.1570   1
  -2   4  -8 115.448 12.7455   1
  -2  -4  -8 88.6698 11.7578   1
   2  -4   9 2562.91 76.3138   6
   2   4   9 2385.24 70.4760   6
  -2   4  -9 2309.51 61.4595   3
   2   4   9 2568.91 77.7805   1
   2  -4   9 2603.44 77.9606   1
  -2   4  -9 2576.78 78.7053   1
  -2  -4  -9 2559.86 78.4539   1
   2   4  10 3234.78 88.8961   6
   2  -4  10 3364.63 95.1719   6
   2  -4  10 3520.86 98.5959   1
   2   4  10 3401.15 97.7744   1
  -2  -4 -10 3331.91 97.8912   1
  -2   4 -10 3375.71 97.8470   1
   2   4  11 354.258 19.3826   6
   2  -4  11 397.997 23.6466   6
  -2   4 -11 404.814 25.3696   1
  -2  -4 -11 370.980 24.5644   1
   2  -4  11 426.318 25.7611   1
   2   4  11 383.239 24.8003   1
  -2  -4 -12 48.2930 11.9066   1
  -2   4 -12 51.5179 11.4136   1
   2  -4  12 50.8903 11.7291   1
   2   4  12 48.2725 11.3393   1
   2  -4  12 76.7315 11.3261   6
   2   4  12 57.6032 9.02137   6
  -2   4 -13 201.026 19.6098   1
  -2  -4 -13 202.559 20.0635   1
   2   4  13 226.756 16.0126   6
   2  -4  13 236.786 18.9933   6
   2  -4  13 227.559 20.6933   1
   2   4  13 266.452 22.1028   1
   2   4  13 196.500 16.9405   5
  -2   4 -14 207.649 20.5884   1
  -2  -4 -14 196.122 19.9730   1
   2   4  14 179.677 17.0781   5
   2  -4  14 246.587 20.2657   6
   2   4  14 187.551 15.2458   6
   2   4  14 185.076 10.0716   3
  -2   4 -15 2038.87 74.7868   1
  -2  -4 -15 2005.24 74.5631   1
   2   4  15 1989.60 68.4615   5
   2   4  15 1931.82 53.6893   3
   2  -4  15 2141.08 72.5067   6
   2   4  15 2048.06 64.7073   6
  -2  -4 -16 361.126 27.8572   1
  -2   4 -16 430.586 29.9777   1
   2   4  16 360.245 25.0206   5
   2   4  16 335.502 14.6615   3
   2  -4  16 370.290 26.6100   6
   2   4  16 349.316 22.1552   6
  -2   4 -17 1927.06 74.8426   1
  -2  -4 -17 1931.04 75.1137   1
   2   4  17 2069.21 70.1883   5
   2   4  17 1779.50 51.2660   3
   2  -4  17 2112.77 73.2753   6
   2   4  17 1950.73 64.1561   6
  -2   4 -18 739.548 42.5037   1
  -2  -4 -18 651.464 40.2577   1
   2   4  18 637.105 35.3874   5
   2   4  18 642.800 22.3712   3
   2  -4  18 751.273 40.1834   6
   2   4  18 654.376 32.7338   6
  -2   4 -19 144.248 21.2419   1
  -2  -4 -19 147.181 21.2217   1
   2   4  19 122.311 8.60819   3
   2   4  19 159.113 18.6874   5
   2  -4  19 183.336 21.9847   6
   2   4  19 174.842 17.6968   6
   2   4  20 271.737 24.0161   5
   2  -4  20 282.629 26.2126   6
   2   4  20 191.258 18.9894   6
   2  -5 -22-2.77798 7.95037   6
  -2  -5  22 1.55328 9.75643   3
  -2   5  22-1.56544 9.30092   3
  -2  -5  21 544.514 33.9692   3
  -2   5  21 520.359 33.5885   3
   2  -5 -21 536.594 27.4039   6
   2   5 -21 615.526 37.0775   6
   2  -5 -20 55.3611 17.5869   2
   2   5 -20 92.6088 19.6602   2
  -2  -5  20 83.0737 14.2386   3
  -2   5  20 63.1973 13.7354   3
   2   5 -20 69.3802 14.8109   6
   2  -5 -20 63.7999 10.1955   6
   2   5 -20 81.6768 15.0264   5
   2   5 -20 66.9152 16.9720   1
   2  -5 -20 58.4041 16.0716   1
   2   5 -19 22.0438 12.5146   2
   2  -5 -19 11.5643 13.5459   2
   2  -5 -19 33.7909 8.37306   6
   2   5 -19 17.2291 10.9576   5
   2   5 -19 18.4039 10.8367   6
  -2  -5  19 9.64231 8.66460   3
  -2   5  19 22.7423 9.72667   3
   2   5 -18-2.09164 10.6564   2
   2  -5 -18 11.0699 12.9593   2
   2   5 -18 1.48885 9.83172   6
   2  -5 -18 7.69337 6.41672   6
   2   5 -18 12.3278 9.96742   5
  -2  -5  18-2.65820 8.45754   3
  -2   5  18-5.48767 8.95104   3
   2   5 -17 1457.70 57.2878   6
   2  -5 -17 1307.45 45.0323   6
   2  -5 -17 1474.39 66.5292   2
   2   5 -17 1305.15 61.9370   2
   2   5 -17 1338.98 54.0199   5
  -2  -5  17 1378.68 54.4185   3
  -2   5  17 1305.61 54.3152   3
   2   5 -16 30.7824 10.7807   6
  -2  -5  16 23.5888 9.31555   3
  -2   5  16 33.3381 9.79567   3
   2  -5 -16 13.9666 10.7746   2
   2   5 -16 29.9074 11.7563   2
  -2  -5  15 3005.30 94.2356   3
   2   5 -15 3190.27 97.7199   6
   2   5 -15 2991.07 103.163   2
   2  -5 -15 2918.09 104.134   2
   2   5 -14 33.9024 9.90055   6
  -2  -5  14 38.2949 9.05666   3
   2   5 -14 49.2574 9.74352   3
   2   5 -14 47.5003 11.1126   2
   2  -5 -14 43.8275 11.7533   2
   2  -5 -13 405.418 19.6390   6
  -2  -5  13 423.865 25.2855   3
   2   5 -13 423.637 25.1140   3
   2   5 -13 441.880 29.2805   2
   2  -5 -13 447.861 30.7785   2
   2   5 -12 150.576 14.4847   3
  -2  -5  12 151.759 15.1695   3
   2  -5 -12 177.243 18.7155   2
   2   5 -12 156.935 17.2134   2
  -2  -5  11 263.116 19.0391   3
   2   5 -11 250.710 18.2572   3
   2  -5 -11 210.910 19.5242   2
   2   5 -11 263.846 20.8129   2
   2   5 -10 179.021 15.0673   3
   2  -5 -10 179.938 10.4950   5
   2  -5 -10 171.224 16.8706   2
   2   5 -10 191.966 17.2995   2
   2   5  -9 10178.6 257.401   3
   2  -5  -9 10349.5 244.616   5
   2  -5  -9 10156.7 261.573   2
   2   5  -9 10560.7 261.287   2
   2   5  -8 317.620 19.5978   3
   2  -5  -8 372.736 13.8502   5
   2   5  -8 362.086 21.9335   2
   2  -5  -8 344.519 21.9802   2
   2  -5  -7 4975.05 117.710   5
  -2   5   7 4997.61 135.131   2
   2  -5  -7 5111.02 133.842   2
   2   5  -7 5131.42 133.271   2
   2  -5  -6 579.785 17.0714   5
  -2  -5   6 600.324 27.1694   3
   2   5  -6 618.530 27.8322   2
   2  -5  -6 590.444 27.5810   2
  -2   5   6 645.458 29.3944   2
  -2  -5   6 595.869 28.1988   2
   2  -5  -5 173.918 6.25510   5
  -2   5   5 197.134 14.5888   2
  -2  -5   5 184.454 14.2271   2
   2  -5  -5 186.983 13.7534   2
   2   5  -5 196.672 13.8073   2
  -2  -5   5 187.526 13.9458   3
  -2  -5   4 565.183 25.0511   2
  -2   5   4 596.913 25.6860   2
  -2  -5   4 564.425 25.5618   3
   2  -5  -4 545.427 24.1433   2
   2   5  -4 542.518 24.0935   2
   2   5  -3 2652.07 70.1398   4
  -2  -5   3 2620.64 75.4818   3
  -2  -5   3 2611.11 74.3552   2
  -2   5   3 2660.84 74.6475   2
   2  -5  -2 367.535 11.5211   5
  -2  -5   2 399.872 19.3840   3
  -2   5   2 407.152 19.0888   2
  -2  -5   2 381.533 18.5357   2
   2   5  -2 360.485 15.0539   4
   2  -5  -1 7624.89 182.273   5
  -2  -5   1 7815.29 190.908   2
  -2   5   1 8090.38 191.055   2
   2  -5  -1 7714.48 190.958   4
  -2  -5   0 567.103 18.9908   4
   2  -5   0 489.893 22.0411   4
   2  -5   0 524.512 17.5662   5
   2   5   0 532.949 22.0765   3
  -2  -5  -1 1710.84 46.8133   4
   2  -5   1 1733.77 52.0181   4
   2   5   1 1737.04 50.7708   3
   2  -5   1 1728.66 46.8875   5
   2  -5   2 1945.35 52.5302   5
   2   5   2 1860.99 57.2359   1
   2  -5   2 1891.28 57.2800   1
  -2   5  -2 1982.43 56.7157   4
   2  -5   2 1903.51 56.4272   4
   2   5   2 1925.40 54.6189   3
   2  -5   2 1813.45 55.8361   6
  -2   5  -3 124.008 10.1496   4
   2  -5   3 106.060 9.87860   1
   2   5   3 92.1654 9.43631   1
   2   5   3 92.3820 8.09606   3
   2  -5   3 93.8795 7.97224   5
  -2   5  -4 0.65839 4.02593   4
   2  -5   4 6.86115 4.84420   1
   2   5   4 3.48707 4.49505   1
   2  -5   4 4.30601 3.83991   5
   2   5   4 2.90306 3.34465   3
  -2   5  -5 1563.06 50.8917   4
   2  -5   5 1678.10 49.8519   5
   2   5   5 1601.26 52.1035   1
   2  -5   5 1628.21 52.1336   1
  -2   5  -6 492.230 24.3143   1
   2  -5   6 445.158 22.8898   1
   2   5   6 477.514 23.5548   1
   2  -5   6 427.526 20.7285   5
  -2   5  -7 5015.39 130.404   1
   2  -5   7 4822.18 128.670   1
   2   5   7 4892.93 129.128   1
   2  -5   7 4870.96 125.692   5
  -2  -5  -8 752.926 33.9459   1
  -2   5  -8 762.527 33.9999   1
   2  -5   8 765.276 33.0394   6
   2  -5   8 760.973 31.2364   5
   2  -5   8 754.227 33.1472   1
   2   5   8 711.751 32.4787   1
  -2   5  -9 21.5457 7.84815   1
  -2  -5  -9 15.5903 7.09616   1
  -2   5  -9 17.3445 3.94928   3
   2  -5   9 22.8805 7.57733   1
   2   5   9 9.40804 6.31275   1
   2  -5   9 17.9274 6.89329   6
   2  -5   9 13.0821 6.41931   5
   2   5  10 139.371 11.6334   6
   2  -5  10 140.523 14.8568   6
  -2   5 -10 150.197 8.74572   3
   2  -5  10 167.244 16.0158   1
   2   5  10 128.123 14.4792   1
  -2   5 -10 162.260 15.6969   1
  -2  -5 -10 141.712 15.0673   1
   2  -5  11 90.1717 11.7346   6
   2   5  11 83.0373 9.41730   6
  -2   5 -11 74.0757 12.0658   1
  -2  -5 -11 71.7657 12.0973   1
  -2   5 -11 73.2041 6.38387   3
   2  -5  11 75.5775 12.5600   1
   2   5  11 84.1726 13.1672   1
  -2   5 -12 44.7764 11.1031   1
  -2  -5 -12 36.0858 10.5000   1
  -2   5 -12 32.1160 4.63922   3
   2   5  12 46.4737 8.00674   6
   2  -5  12 68.2409 10.8809   6
   2  -5  12 38.9430 10.3706   1
   2   5  12 42.8370 10.5168   1
   2  -5  13 763.479 36.1055   6
   2   5  13 693.307 29.1053   6
  -2   5 -13 618.125 34.7127   1
  -2  -5 -13 739.997 37.4623   1
   2   5  13 612.460 31.5030   5
  -2   5 -13 612.563 21.4646   3
   2  -5  13 702.595 37.1063   1
   2   5  13 745.442 37.8283   1
   2   5  14 105.029 11.6184   6
   2  -5  14 84.6885 13.9329   6
   2   5  14 113.613 14.3379   5
  -2   5 -14 111.461 16.2383   1
  -2  -5 -14 62.4167 12.7614   1
   2  -5  15 854.540 41.2203   6
   2   5  15 846.381 34.2992   6
   2   5  15 814.666 38.2619   5
  -2  -5 -15 707.478 39.9380   1
  -2   5 -15 805.182 41.9121   1
   2   5  16 21.6749 9.20728   5
  -2  -5 -16 37.9776 10.2529   1
  -2   5 -16 35.6853 10.4716   1
   2   5  16 35.9448 9.16478   6
   2  -5  16 31.4980 11.8546   6
   2   5  16 18.9961 5.68316   3
  -2   5 -17 158.038 20.4527   1
  -2  -5 -17 162.821 20.6848   1
   2   5  17 184.844 18.9887   5
   2   5  17 144.577 10.7554   3
   2   5  17 193.919 16.5199   6
   2  -5  17 147.493 19.6057   6
  -2   5 -18 26.6421 12.6832   1
  -2  -5 -18 21.7782 12.2816   1
   2   5  18 19.6239 10.6098   5
   2   5  18 27.4770 9.46880   6
   2  -5  18 29.7719 12.2845   6
   2   5  18 29.0906 6.10117   3
  -2   5 -19 51.8679 14.8036   1
  -2  -5 -19 75.9122 16.4639   1
   2   5  19 58.3766 13.6958   5
   2   5  19 52.2464 6.95447   3
   2   5  19 82.4707 13.0672   6
   2  -5  19 53.7641 15.3636   6
   2   5  20 44.8043 13.7984   5
   2   5  20 28.8795 6.14570   3
   2   5  20 29.0723 10.9474   6
  -2   6  22 150.122 19.7290   3
  -2  -6  22 169.250 20.5870   3
  -2  -6  21 282.950 24.7652   3
  -2   6  21 305.821 25.6556   3
   2  -6 -21 293.209 19.1016   6
   2   6 -20 596.857 36.0847   5
   2  -6 -20 565.843 26.6628   6
   2   6 -20 610.281 37.2677   6
   2  -6 -20 575.060 42.8820   2
   2   6 -20 562.182 41.6222   2
  -2  -6  20 598.244 35.1901   3
  -2   6  20 578.647 34.7089   3
   2  -6 -20 651.276 41.1133   1
   2   6 -20 592.298 40.4688   1
   2  -6 -19-2.27575 11.3607   2
   2   6 -19 6.46496 11.6198   2
  -2   6  19 10.1601 9.69885   3
  -2  -6  19 4.23369 8.74765   3
   2   6 -19 3.16194 9.66630   6
   2  -6 -19 8.75327 6.17520   6
   2   6 -19 2.93502 9.21854   5
   2  -6 -19 3.68119 10.4428   1
   2   6 -18 71.6049 16.1418   2
   2  -6 -18 102.589 20.2433   2
   2   6 -18 93.6366 15.6178   6
   2  -6 -18 85.2146 10.0381   6
   2   6 -18 96.3690 15.2822   5
  -2  -6  18 89.9566 14.2419   3
  -2   6  18 94.1292 15.1521   3
   2   6 -17 846.274 41.9849   6
   2  -6 -17 860.501 48.9396   2
   2   6 -17 693.353 43.0744   2
   2   6 -17 809.304 39.9484   5
  -2  -6  17 778.933 39.0943   3
  -2   6  17 738.006 38.5538   3
   2   6 -16 507.860 31.4462   6
  -2  -6  16 496.539 29.8380   3
   2   6 -16 499.131 28.9777   3
   2   6 -16 495.943 34.6584   2
   2  -6 -16 547.386 36.9647   2
   2  -6 -15 123.559 10.1645   6
   2   6 -15 153.289 17.5283   6
   2  -6 -15 155.423 20.1892   2
   2   6 -15 136.750 18.1955   2
  -2  -6  15 147.057 16.1742   3
   2   6 -15 123.532 14.8047   3
   2   6 -14 19.1425 10.5367   2
   2  -6 -14 10.3514 9.63148   2
   2  -6 -14 6.67459 4.91406   6
  -2  -6  14 10.7422 7.50088   3
   2   6 -14 8.24757 6.79552   3
   2   6 -14 23.0552 10.0631   6
  -2  -6  13 184.010 16.8894   3
   2   6 -13 198.839 16.7508   3
   2  -6 -13 165.797 19.2867   2
   2   6 -13 166.162 18.7831   2
   2  -6 -13 177.762 11.8300   6
   2  -6 -12 2135.11 76.2293   2
   2   6 -12 2007.67 73.3617   2
  -2  -6  12 2112.11 70.2559   3
   2   6 -12 2095.68 69.0803   3
   2   6 -11 568.002 31.4569   2
   2  -6 -11 554.884 32.0756   2
  -2  -6  11 531.216 29.0857   3
   2   6 -11 590.385 29.2259   3
   2   6 -10 46.0839 8.51920   3
   2   6 -10 69.4973 10.7675   2
   2  -6 -10 62.7920 10.5778   2
   2   6  -9 2134.41 69.0766   2
   2  -6  -9 2061.60 69.2449   2
   2   6  -9 2088.33 67.1294   3
   2   6  -8 997.343 39.6797   2
   2  -6  -8 970.489 39.9408   2
   2   6  -8 970.206 38.9058   3
  -2   6   7 237.416 18.4042   2
   2  -6  -7 242.604 17.4085   2
   2   6  -7 253.827 17.2753   2
   2   6  -7 268.737 17.4599   3
  -2   6   6 1791.59 58.6229   2
  -2  -6   6 1666.86 57.1511   2
  -2  -6   6 1767.93 58.1303   3
   2   6  -6 1718.49 56.3495   2
   2  -6  -6 1729.00 56.7965   2
   2   6  -5-0.60772 3.86714   4
   2  -6  -5 1.50358 4.12526   2
   2   6  -5 0.73741 4.11551   2
  -2  -6   5 2.52354 4.92380   3
  -2  -6   5 0.84601 4.72163   2
  -2   6   5 3.35932 4.84084   2
   2   6  -4 2904.15 78.1876   4
  -2   6   4 2784.58 81.3326   2
  -2  -6   4 2932.30 81.9175   2
   2   6  -3 3300.19 85.6418   4
  -2   6   3 3214.19 88.6751   2
  -2  -6   3 3216.05 88.8481   2
   2   6  -2 6.72530 3.42150   4
  -2  -6   2 6.20620 4.29119   2
  -2   6   2 5.00791 3.82956   2
  -2   6   1 204.759 12.7181   2
  -2  -6   1 209.175 12.8255   2
   2  -6  -1 192.145 13.4467   4
   2   6   0 470.017 21.2593   3
  -2  -6   0 472.480 18.7364   4
   2  -6   0 460.509 21.8803   4
   2  -6   1 586.227 24.5056   1
   2   6   1 555.234 24.2259   1
   2  -6   1 608.727 25.6801   4
  -2  -6  -1 583.098 21.7141   4
   2   6   1 575.956 24.1911   3
   2  -6   1 595.753 23.9151   6
   2  -6   2 2549.72 69.4239   5
   2  -6   2 2628.33 74.6595   1
   2   6   2 2549.63 74.5011   1
   2  -6   2 2710.23 76.1462   4
  -2   6  -2 2733.28 75.5727   4
   2   6   2 2592.17 73.5905   3
   2  -6   2 2873.77 75.3948   6
   2  -6   3 4772.42 119.712   5
   2  -6   3 4781.52 124.070   1
   2   6   3 4540.67 124.193   1
  -2   6  -3 4821.09 124.892   4
   2   6   3 4657.30 122.017   3
   2  -6   3 4999.36 124.987   6
   2  -6   4 2726.84 74.6013   1
   2  -6   4 2615.82 71.3924   5
   2  -6   5 6086.43 155.828   1
   2   6   5 6041.57 155.756   1
  -2   6  -6 2042.16 63.2745   1
   2  -6   6 2008.12 62.5308   1
   2   6   6 1938.95 62.0823   1
  -2   6  -7 3.49681 4.36525   4
   2   6   7 4.45518 5.29518   1
  -2   6  -7 9.22624 5.40162   1
   2  -6   7 3.52614 5.08240   1
   2  -6   8 28.8004 7.83628   1
   2   6   8 21.1362 7.07107   1
  -2   6  -8 19.8239 7.29451   1
  -2  -6  -8 9.25936 5.56220   1
   2  -6   9 296.953 20.3327   6
  -2   6  -9 288.959 13.8937   3
   2  -6   9 293.410 19.9768   1
   2   6   9 317.221 20.5726   1
  -2   6  -9 272.157 20.0526   1
  -2  -6  -9 284.189 20.1261   1
   2  -6  10 2060.77 68.1293   6
   2   6  10 1904.75 59.0622   6
  -2   6 -10 1912.19 55.1991   3
   2  -6  10 2080.94 68.7543   1
   2   6  10 2108.27 68.7688   1
  -2   6 -10 2204.67 69.7610   1
  -2  -6 -10 2018.49 68.3574   1
   2  -6  11 3163.41 99.0793   6
   2   6  11 3251.80 90.5719   6
  -2   6 -11 3526.71 102.253   1
  -2  -6 -11 3193.45 100.215   1
  -2   6 -11 3271.59 86.0001   3
   2  -6  11 3523.75 102.727   1
   2   6  11 3432.32 101.904   1
  -2   6 -12 1.30364 7.15338   1
  -2  -6 -12 6.64750 7.89917   1
  -2   6 -12 0.46660 3.42865   3
   2  -6  12 5.00424 7.32300   6
   2   6  12 0.72353 5.10786   6
   2   6  12-1.33196 7.91376   1
   2  -6  12 5.38471 7.63725   1
  -2   6 -13 1273.52 39.6434   3
  -2   6 -13 1473.39 56.3906   1
  -2  -6 -13 1335.08 54.8102   1
   2   6  13 1360.53 45.3675   6
   2  -6  13 1397.17 54.4103   6
   2   6  14 624.605 31.5755   5
   2  -6  14 627.181 34.4599   6
   2   6  14 568.502 26.2331   6
  -2   6 -14 558.934 21.4334   3
  -2   6 -14 588.710 34.0394   1
  -2  -6 -14 624.086 35.0676   1
   2   6  15 69.9887 11.9428   5
  -2   6 -15 45.8937 12.6366   1
  -2  -6 -15 40.6746 11.5707   1
   2   6  15 57.9590 9.54578   6
   2  -6  15 84.3647 15.2140   6
   2  -6  16 250.741 23.6390   6
   2   6  16 271.012 18.4498   6
  -2   6 -16 300.489 25.0122   1
  -2  -6 -16 262.430 23.6792   1
   2   6  16 324.979 23.4878   5
  -2   6 -17 200.591 22.3349   1
  -2  -6 -17 201.230 22.6321   1
   2   6  17 223.265 20.5185   5
   2  -6  17 205.178 22.1594   6
   2   6  17 208.936 16.9926   6
   2   6  17 224.128 14.0045   3
   2   6  18 459.113 29.5443   5
   2   6  18 407.619 19.4340   3
   2   6  18 413.415 24.1926   6
   2  -6  18 445.921 31.8497   6
  -2   6 -18 463.422 33.5183   1
  -2  -6 -18 416.241 32.3386   1
   2   6  19 1548.35 59.7833   5
   2   6  19 1301.16 43.4531   3
   2   6  19 1494.82 52.7783   6
   2  -6  19 1670.24 66.1470   6
  -2  -6 -19 1484.87 64.7563   1
  -2   6 -19 1372.65 63.1519   1
   2   6  20 215.800 22.2468   5
   2   6  20 212.750 13.8255   3
  -2   7  21 422.350 30.3157   3
   2  -7 -21 383.824 20.5895   6
   2  -7 -20 148.493 23.5476   2
   2   7 -20 131.706 21.7255   2
  -2  -7  20 104.069 15.9557   3
  -2   7  20 112.978 16.5942   3
   2   7 -20 112.173 18.9773   1
   2  -7 -20 92.4337 18.8159   1
   2   7 -19 1327.21 61.4235   1
   2  -7 -19 1402.26 62.8238   1
   2   7 -19 1379.37 59.1591   6
   2  -7 -19 1369.60 66.4696   2
   2   7 -19 1352.20 64.6583   2
   2   7 -19 1441.03 58.7273   5
  -2  -7  19 1385.91 56.6609   3
  -2   7  19 1292.59 55.9481   3
   2  -7 -18-19.3386 13.1368   2
   2   7 -18-1.99485 10.7560   2
   2   7 -18-1.58110 10.1895   6
   2   7 -18-2.92948 10.7627   5
  -2  -7  18 1.39029 8.38123   3
  -2   7  18-1.44190 8.93724   3
   2  -7 -17 803.274 28.9559   6
   2   7 -17 841.962 42.5672   6
   2  -7 -17 901.090 49.2447   2
   2   7 -17 795.652 45.2802   2
  -2  -7  17 736.498 38.8556   3
   2   7 -17 790.468 39.0259   3
   2  -7 -16 23.2542 11.6886   2
   2   7 -16 17.7522 10.3989   2
   2  -7 -16 17.8251 5.71794   6
   2   7 -16 17.9212 10.6597   6
  -2  -7  16 11.7879 8.01764   3
   2   7 -16 20.8308 9.00638   3
   2   7 -15 134.303 15.3609   3
  -2  -7  15 147.742 16.4193   3
   2  -7 -15 145.610 10.2690   6
   2   7 -15 161.567 18.5629   6
   2  -7 -15 128.100 19.1019   2
   2   7 -15 111.410 16.9063   2
  -2  -7  14 218.003 19.3968   3
   2   7 -14 204.889 18.1111   3
   2  -7 -14 242.159 12.9054   6
   2  -7 -14 219.479 22.6438   2
   2   7 -14 242.184 22.1639   2
  -2  -7  13 965.166 43.7521   3
   2   7 -13 1077.27 44.0971   3
   2  -7 -13 1018.87 32.7029   6
   2  -7 -13 1090.50 49.8097   2
   2   7 -13 1082.06 48.1628   2
   2  -7 -12 69.0025 7.23423   6
   2   7 -12 74.3141 11.4472   3
  -2  -7  12 64.2959 10.8152   3
   2  -7 -12 32.1837 11.1465   2
   2   7 -12 63.3839 12.6002   2
   2   7 -11 4160.70 119.684   2
   2  -7 -11 4109.95 121.430   2
  -2  -7  11 4049.23 117.384   3
   2   7 -11 3961.67 115.972   3
   2   7 -10 339.502 22.6712   2
   2  -7 -10 367.375 24.2900   2
   2   7 -10 365.946 22.4876   3
   2   7  -9 35.7807 8.24599   3
   2   7  -9 37.2689 8.73995   2
   2  -7  -9 38.4537 8.85571   2
   2   7  -8 337.772 20.7460   2
   2  -7  -8 354.690 21.7315   2
   2   7  -8 293.531 19.7379   3
  -2   7   7 1593.56 58.1309   2
   2   7  -7 1756.10 58.1304   3
   2   7  -7 1820.43 57.6753   2
   2  -7  -7 1726.85 57.4548   2
   2   7  -6 2043.64 62.6968   4
  -2  -7   6 2121.17 66.7538   2
  -2   7   6 2035.16 66.0960   2
   2   7  -6 2009.38 65.6136   3
   2  -7  -6 2191.62 65.4490   2
   2   7  -6 2170.16 65.0062   2
   2   7  -5 9701.55 240.904   2
   2  -7  -5 9857.85 241.246   2
  -2   7   5 9639.67 243.722   2
  -2  -7   5 10132.8 244.641   2
   2   7  -5 9720.93 240.023   4
  -2   7   4 70.4303 8.74437   2
  -2  -7   4 94.4008 9.67588   2
   2   7  -4 68.2064 7.94154   4
  -2   7   3 2084.99 60.5112   2
  -2  -7   3 1999.98 60.0649   2
   2   7  -3 1970.60 58.2316   4
  -2   7   2 984.526 34.0815   2
  -2  -7   2 962.225 33.7667   2
   2   7  -2 936.457 32.3172   4
   2  -7  -1 112.287 11.1846   4
  -2  -7   1 126.035 9.99576   2
  -2   7   1 134.025 10.3928   2
   2  -7  -1 125.143 9.46150   6
  -2  -7   0 1880.42 53.2751   4
   2  -7   0 1793.59 57.4510   4
   2  -7   0 1857.59 54.0613   6
  -2  -7   0 1774.10 53.4485   2
   2  -7   1 2621.88 72.2327   6
   2  -7   1 2617.38 75.5768   4
  -2  -7  -1 2560.95 70.0805   4
   2  -7   1 2602.66 72.2507   1
   2   7   1 2415.65 71.5155   1
   2  -7   2 240.919 14.6855   6
  -2  -7  -2 211.551 12.7769   4
   2  -7   2 207.428 15.2916   4
   2   7   2 246.037 14.9814   1
   2  -7   2 213.744 14.0013   1
   2  -7   3 12545.9 305.924   1
   2   7   3 12650.8 306.103   1
   2  -7   3 12996.3 308.364   6
   2   7   4 858.136 32.5424   1
   2  -7   4 855.780 32.4196   1
   2  -7   4 917.398 34.5989   6
   2  -7   5 272.725 17.4088   6
   2   7   5 279.470 16.7532   1
   2  -7   5 260.595 16.2353   1
  -2   7  -6 25.2068 6.76114   4
   2  -7   6 25.1800 6.37891   1
   2   7   6 22.8937 6.47466   1
  -2   7  -6 18.7750 6.35235   1
  -2   7  -7 491.815 25.0077   4
  -2   7  -7 486.480 24.9398   1
   2  -7   7 452.271 23.5796   1
   2   7   7 441.328 23.6022   1
  -2   7  -8 946.616 39.1437   4
  -2   7  -8 982.993 39.4007   1
  -2  -7  -8 946.921 39.0681   1
   2  -7   8 998.155 39.1260   1
   2   7   8 923.602 38.0541   1
  -2   7  -9 2074.71 68.4664   4
  -2   7  -9 1999.11 58.8468   3
   2  -7   9 2156.43 68.9620   1
   2   7   9 2124.28 68.5714   1
  -2  -7  -9 2110.24 69.2741   1
  -2   7  -9 2097.76 68.6334   1
   2   7  10 85.9577 9.29562   6
  -2   7 -10 82.4382 8.10483   3
   2  -7  10 70.8982 11.2709   1
   2   7  10 85.2749 12.4562   1
  -2   7 -10 77.7040 11.7923   1
  -2  -7 -10 84.7444 12.0781   1
   2  -7  11 1831.74 63.8261   6
   2   7  11 1724.47 53.4002   6
  -2   7 -11 1838.34 63.7855   1
  -2  -7 -11 1646.36 61.9802   1
  -2   7 -11 1693.55 51.1056   3
   2  -7  11 1874.96 64.5058   1
   2   7  11 1760.22 63.1718   1
  -2   7 -12-1.12938 3.86016   3
  -2  -7 -12 10.5622 8.29307   1
  -2   7 -12 7.74866 7.44407   1
   2   7  12 2.05531 4.73491   6
   2  -7  12 3.91706 7.87103   6
  -2   7 -13 72.8389 7.95265   3
  -2  -7 -13 54.6090 11.7804   1
  -2   7 -13 72.6018 13.0361   1
   2   7  13 68.3129 9.07205   6
   2  -7  13 62.3429 12.7204   6
   2  -7  14 654.462 36.0007   6
   2   7  14 619.180 26.8955   6
  -2   7 -14 625.065 24.3215   3
  -2   7 -14 612.217 35.0699   1
  -2  -7 -14 656.740 36.3111   1
   2  -7  15 166.901 19.4094   6
   2   7  15 149.353 13.3804   6
  -2   7 -15 154.905 11.4255   3
  -2   7 -15 137.230 18.1232   1
  -2  -7 -15 155.862 19.3108   1
   2   7  15 153.713 16.6131   5
   2  -7  16 302.000 25.5454   6
   2   7  16 242.548 17.1262   6
  -2   7 -16 264.742 24.7790   1
  -2  -7 -16 281.556 25.1423   1
  -2   7 -16 227.837 13.8979   3
   2   7  16 289.841 22.4349   5
   2   7  17 791.378 39.4530   5
   2  -7  17 791.006 43.3512   6
   2   7  17 812.933 33.6383   6
  -2  -7 -17 782.549 43.8227   1
  -2   7 -17 812.808 43.7488   1
   2   7  18 1.38471 8.92400   5
   2   7  18 11.1013 7.83059   6
   2  -7  18 3.55130 11.8646   6
  -2   7 -18 3.51265 11.1764   1
  -2  -7 -18-3.60199 10.7008   1
   2   7  19 37.6997 12.3703   5
   2   7  19 5.77814 7.98591   6
   2   7  19 28.8992 7.06641   3
  -2   7 -19 21.9879 12.8085   1
  -2  -7 -19 16.9330 12.1339   1
   2   7  20 37.6154 7.46469   3
   2   7  20 32.9910 13.1708   5
   2  -8 -20 18.2929 14.1740   2
   2   8 -20-2.13919 12.5234   2
   2  -8 -20 16.7257 12.9838   1
  -2   8  20 14.0191 10.5304   3
   2  -8 -19 35.3209 16.5704   2
   2   8 -19 42.8162 14.8819   2
   2   8 -19 47.7919 14.4336   1
   2  -8 -19 53.6016 14.1500   1
   2  -8 -19 56.2347 7.62633   6
   2   8 -18 138.753 18.3149   5
   2   8 -18 159.755 20.3547   6
   2  -8 -18 164.235 11.0198   6
   2  -8 -18 171.316 20.9966   1
   2   8 -18 193.739 22.9927   2
   2  -8 -18 165.619 23.4068   2
   2   8 -18 174.550 19.0475   3
   2  -8 -17 645.663 40.8530   2
   2   8 -17 618.880 39.0342   2
   2   8 -17 641.723 34.7536   3
   2   8 -17 643.171 37.1336   6
   2  -8 -17 587.909 22.1559   6
   2   8 -16 2695.51 88.4762   3
   2  -8 -16 2894.27 99.7508   2
   2   8 -16 2797.47 96.3042   2
   2  -8 -16 2709.28 71.6822   6
   2   8 -15 551.216 31.0142   3
   2   8 -15 521.823 33.9420   2
   2  -8 -15 514.592 35.1873   2
   2  -8 -15 569.634 20.1510   6
   2   8 -14 1733.32 62.4917   3
   2   8 -14 1674.22 66.1609   2
   2  -8 -14 1722.21 68.9864   2
   2  -8 -14 1721.95 47.0940   6
   2   8 -13 962.778 41.7261   3
   2  -8 -13 1025.18 47.6330   2
   2   8 -13 995.213 45.1009   2
   2  -8 -13 901.085 28.1907   6
   2   8 -12 351.293 23.6026   3
   2  -8 -12 420.706 27.9921   2
   2   8 -12 435.566 27.3160   2
   2  -8 -12 381.530 14.9544   6
   2   8 -12 436.199 27.5888   6
   2   8 -11 195.133 17.0686   3
   2   8 -11 153.044 16.1327   2
   2  -8 -11 141.737 16.2480   2
   2  -8 -11 160.680 8.87281   6
   2  -8 -10 488.270 28.0396   2
   2   8 -10 470.129 26.8711   2
   2   8 -10 490.143 27.2602   3
   2  -8  -9-4.37064 5.99561   2
   2   8  -9 1.02449 5.71766   2
   2   8  -9 3.21517 5.67432   3
   2  -8  -8 3857.21 109.203   2
   2   8  -8 3864.93 108.407   2
   2   8  -8 3813.03 110.172   3
   2   8  -7 542.540 25.9110   4
   2   8  -7 541.642 27.4249   3
   2  -8  -7 549.220 26.7733   2
   2   8  -7 544.359 26.2422   2
   2   8  -6 30.3256 6.98145   4
   2   8  -6 40.9165 8.09353   3
   2  -8  -6 27.3165 6.88358   2
   2   8  -6 33.1943 6.84651   2
  -2   8   6 26.3934 7.50802   2
  -2  -8   6 24.4888 6.68445   2
   2   8  -5 589.502 28.4089   3
  -2  -8   5 618.419 27.7166   2
  -2   8   5 569.331 26.8555   2
   2   8  -5 589.638 26.2666   4
   2   8  -4 78.8387 8.97031   4
   2  -8  -4 91.3430 7.33138   6
  -2   8   4 75.8516 9.29411   2
  -2  -8   4 92.1959 9.69040   2
   2   8  -3 10.4437 4.89830   4
  -2   8   3 12.8047 4.91483   2
  -2  -8   3 16.3735 5.34951   2
   2  -8  -3 16.8622 4.26849   6
  -2   8   2 2081.90 61.5346   2
  -2  -8   2 2196.65 62.2594   2
   2  -8  -2 2154.89 66.9130   4
   2  -8  -2 2108.42 59.5247   6
  -2  -8   1 583.611 24.2777   4
   2  -8  -1 524.561 26.1814   4
  -2  -8   1 541.694 22.9083   2
  -2   8   1 576.085 23.5645   2
   2  -8  -1 566.658 22.5624   6
  -2  -8   0 2437.81 68.4792   4
   2  -8   0 2449.30 73.1416   4
   2  -8   0 2446.57 68.0046   6
  -2   8   0 2421.52 67.1009   2
  -2  -8   0 2273.16 66.5515   2
   2  -8   1 2383.65 67.4222   6
   2   8   1 2269.71 66.0135   1
   2  -8   1 2465.81 66.6925   1
   2  -8   1 2258.24 71.2459   4
  -2  -8  -1 2294.04 66.5697   4
   2  -8   2 242.610 14.9970   6
   2  -8   2 235.481 14.2637   1
   2   8   2 214.404 13.7329   1
  -2  -8  -2 199.395 13.3697   4
   2  -8   2 229.179 16.3739   4
   2  -8   3 247.430 15.9279   6
   2   8   3 225.873 14.0172   1
   2  -8   3 248.950 14.6052   1
  -2   8  -3 245.380 16.8524   4
  -2   8  -4 561.625 27.3534   4
   2  -8   4 606.662 26.9916   6
   2   8   4 593.321 25.2009   1
   2  -8   4 574.784 24.8716   1
  -2   8  -5 28.8405 7.56540   4
   2  -8   5 38.3924 7.37479   1
   2   8   5 36.5485 7.01016   1
   2  -8   5 33.3752 7.68684   6
  -2   8  -6 3556.55 101.667   4
   2  -8   6 3571.35 101.211   6
   2  -8   6 3511.26 98.1042   1
   2   8   6 3534.76 98.2418   1
  -2   8  -7 1566.98 55.8934   4
  -2   8  -7 1656.51 54.7318   1
   2  -8   7 1586.26 55.7383   6
   2  -8   7 1664.13 54.3413   1
   2   8   7 1563.58 53.2880   1
  -2   8  -8 96.4914 12.1799   4
  -2   8  -8 119.844 12.5908   1
  -2  -8  -8 87.2662 11.6271   1
   2   8   8 76.7681 10.4952   1
   2  -8   8 105.976 12.4217   1
  -2   8  -9 2739.38 84.8545   4
  -2   8  -9 2773.47 83.6496   1
  -2  -8  -9 2548.24 82.4954   1
   2  -8   9 2730.92 83.4286   1
   2   8   9 2712.89 82.9701   1
   2   8  10 177.450 12.2364   6
  -2   8 -10 176.583 16.7838   4
  -2  -8 -10 192.525 17.0300   1
  -2   8 -10 189.114 16.9115   1
  -2   8 -10 172.450 12.2647   3
   2  -8  10 206.014 17.0593   1
   2   8  10 134.584 15.1252   1
   2   8  11 243.541 14.4006   6
  -2   8 -11 219.904 19.3040   4
  -2   8 -11 252.233 14.7316   3
   2  -8  11 231.661 20.2059   1
   2   8  11 232.549 19.7859   1
  -2   8 -11 252.589 20.3919   1
  -2  -8 -11 250.082 20.4446   1
   2  -8  12 1350.13 54.9867   6
   2   8  12 1341.57 43.9023   6
  -2   8 -12 1413.90 44.3757   3
  -2   8 -12 1414.33 54.8005   1
  -2  -8 -12 1343.53 53.9766   1
  -2   8 -13 0.65909 5.02571   3
   2  -8  13 11.5643 9.98984   6
   2   8  13-1.99238 5.74210   6
  -2  -8 -13 6.95149 8.26036   1
  -2   8 -13-2.71102 8.28717   1
  -2   8 -14 2237.84 64.9873   3
  -2   8 -14 2332.22 80.0700   1
  -2  -8 -14 2281.50 79.2212   1
   2  -8  14 2403.75 81.4665   6
   2   8  14 2129.00 65.2219   6
   2   8  15 1938.60 67.7949   5
   2  -8  15 2076.17 74.9191   6
   2   8  15 1867.30 58.9187   6
  -2   8 -15 1978.71 58.1794   3
  -2   8 -15 1974.15 72.7992   1
  -2  -8 -15 1949.87 72.6357   1
   2   8  16 8.39892 6.50982   6
   2  -8  16 6.73544 11.3814   6
   2   8  16 2.57760 8.09565   5
  -2   8 -16 14.3732 10.2922   1
  -2  -8 -16-4.89476 10.3826   1
  -2   8 -16 1.30086 5.09146   3
   2   8  17 505.380 30.4695   5
   2  -8  17 523.008 35.1959   6
   2   8  17 506.091 24.5257   6
  -2   8 -17 468.945 33.0885   1
  -2  -8 -17 489.154 34.1565   1
  -2   8 -17 481.487 22.0134   3
   2   8  18 124.439 16.3488   5
  -2   8 -18 138.522 19.8068   1
  -2  -8 -18 141.439 20.6218   1
   2   8  18 132.364 13.5704   6
  -2   8 -19-3.65903 10.7091   1
  -2  -8 -19-3.74278 10.9542   1
   2   8  19-2.86930 9.91487   5
   2   8  20 290.314 24.9025   5
   2   8  20 248.310 16.6617   3
   2  -9 -20 49.6682 16.8079   2
   2   9 -20 75.5309 17.1620   2
   2   9 -19 16.0130 12.8993   2
   2  -9 -19 2.18423 12.3918   2
   2   9 -19-3.02039 9.97279   3
   2   9 -19 3.63899 12.4369   1
   2  -9 -19 5.29587 10.9414   1
   2  -9 -18 92.4379 18.5594   2
   2   9 -18 117.891 19.1239   2
   2   9 -18 107.004 15.9049   3
   2  -9 -18 91.4921 16.8971   1
   2   9 -18 89.0164 17.8463   1
   2   9 -18 109.033 17.4165   6
   2   9 -17 212.797 19.8995   3
   2  -9 -17 175.000 22.5673   2
   2   9 -17 156.894 20.8920   2
   2  -9 -17 187.845 21.7987   1
   2   9 -16 9.67112 7.96595   3
   2  -9 -16 11.4233 9.70174   2
   2   9 -16 5.10666 8.84628   2
   2   9 -15 755.723 37.5354   3
   2   9 -15 696.877 39.1158   2
   2  -9 -15 768.530 42.6853   2
   2   9 -14 782.561 38.2833   3
   2  -9 -14 877.692 44.1392   2
   2   9 -14 853.613 42.0735   2
   2   9 -14 870.101 42.5613   6
   2  -9 -14 777.592 21.7035   6
   2  -9 -13 89.6764 15.1053   2
   2   9 -13 68.0790 12.6743   2
   2  -9 -13 63.3007 4.28914   6
   2   9 -13 75.2023 13.9068   6
   2   9 -13 71.1016 12.5017   3
   2  -9 -12-4.25145 8.16921   2
   2   9 -12 1.28598 7.29649   2
   2  -9 -12 4.99949 2.24281   6
   2   9 -12 11.2045 9.35869   6
   2   9 -12 14.8739 8.18574   3
   2  -9 -11 466.842 28.1192   2
   2   9 -11 423.907 26.2357   2
   2  -9 -11 443.603 13.6999   6
   2   9 -11 441.790 26.7032   3
   2   9 -10 861.396 39.5849   3
   2   9 -10 963.916 40.3698   2
   2  -9 -10 966.920 41.4632   2
   2   9  -9 1326.72 50.6738   4
   2   9  -9 1533.19 54.9472   3
   2   9  -9 1552.86 53.2295   2
   2  -9  -9 1412.74 52.7657   2
   2   9  -8 2.85889 5.82682   4
   2  -9  -8 7.93789 6.39499   2
   2   9  -8 0.92705 5.42716   2
   2   9  -8 5.54031 5.53198   3
   2  -9  -7 594.534 19.5282   6
   2   9  -7 631.750 30.9602   3
   2  -9  -7 619.402 28.4457   2
   2   9  -7 662.660 28.5635   2
   2   9  -7 632.487 29.0211   4
   2  -9  -6 189.997 9.61973   6
   2   9  -6 187.912 15.0601   4
   2   9  -6 214.855 17.1060   3
   2  -9  -6 220.386 15.0334   2
   2   9  -6 226.478 14.7618   2
   2  -9  -5 39.1615 5.12072   6
   2   9  -5 33.2839 7.72772   4
  -2   9   5 30.1404 7.47581   2
  -2  -9   5 37.6624 7.85024   2
   2   9  -5 56.8950 9.35832   3
   2   9  -4 1188.00 41.6548   4
   2  -9  -4 1089.78 34.4305   6
  -2   9   4 1134.44 40.4776   2
  -2  -9   4 1244.76 41.7159   2
   2   9  -3 926.330 35.5435   4
   2  -9  -3 929.970 31.0401   6
  -2  -9   3 1012.84 35.2938   2
  -2   9   3 984.377 34.9098   2
   2  -9  -2 3197.06 93.7937   4
   2  -9  -2 3235.68 85.0899   6
  -2   9   2 3298.63 87.3615   2
  -2  -9   2 3112.41 86.6241   2
  -2  -9   1 3918.28 106.354   4
   2  -9  -1 3902.16 110.590   4
  -2  -9   1 3965.30 102.843   2
  -2   9   1 3988.46 103.121   2
   2  -9  -1 3846.39 102.424   6
   2  -9   0 16.2951 5.36979   6
  -2  -9   0 27.3257 6.10997   4
   2  -9   0 26.7747 7.24585   4
   2   9   0 30.0829 7.27447   3
  -2   9   0 22.5070 5.12400   2
  -2  -9   0 26.7581 5.18387   2
   2  -9   0 28.0918 5.74981   1
   2   9   0 17.6882 4.53525   1
   2  -9   1 260.672 14.4772   1
   2   9   1 257.391 14.5542   1
  -2  -9  -1 257.117 15.9822   4
   2  -9   1 286.990 19.2558   4
   2   9   1 304.562 18.6441   3
   2  -9   1 257.973 15.5969   6
   2  -9   2 12.8766 5.53049   4
  -2  -9  -2 5.01515 4.32205   4
   2  -9   2 5.66194 4.20330   1
   2   9   2 8.16478 4.32935   1
   2  -9   2 6.65098 4.99756   6
   2  -9   3 135.940 11.9948   6
  -2  -9  -3 147.376 12.2804   4
   2   9   3 144.177 11.0410   1
   2  -9   3 137.311 10.8595   1
  -2   9  -4 2502.14 76.0188   4
   2   9   4 2423.06 69.6607   1
   2  -9   4 2434.82 69.5692   1
   2  -9   4 2323.86 72.6401   6
  -2   9  -5 850.000 36.7102   4
   2  -9   5 844.043 32.5035   1
   2   9   5 840.827 32.5163   1
   2  -9   5 894.800 35.9801   6
  -2   9  -6 737.043 33.9891   4
   2  -9   6 718.514 30.0442   1
   2   9   6 742.564 30.4277   1
   2  -9   6 734.525 32.8796   6
  -2   9  -7 3601.05 106.602   4
   2  -9   7 3798.85 106.487   6
   2  -9   7 3526.42 101.540   1
   2   9   7 3721.62 102.338   1
  -2   9  -8 234.388 18.7519   4
  -2   9  -8 242.260 17.5901   1
  -2  -9  -8 257.327 18.1720   1
   2  -9   8 273.698 19.9143   6
   2  -9   8 230.034 17.3585   1
   2   9   8 244.620 17.6561   1
  -2   9  -9-1.18522 6.83319   4
  -2   9  -9 7.22989 6.48911   1
  -2  -9  -9 15.0923 6.40665   1
   2  -9   9 3.14560 6.67372   1
   2   9   9 10.2978 7.04035   1
   2   9  10 466.152 20.3640   6
  -2   9 -10 426.528 25.8218   1
  -2  -9 -10 445.902 26.5502   1
  -2   9 -10 481.035 28.0962   4
  -2   9 -10 445.766 21.6814   3
   2  -9  10 502.219 27.4736   1
   2   9  10 467.698 26.7120   1
  -2   9 -11 39.0275 10.6302   4
  -2   9 -11 41.5319 7.75095   3
  -2   9 -11 33.2642 10.0095   1
  -2  -9 -11 41.8064 10.2820   1
   2   9  11 21.0380 6.02983   6
   2   9  12 3173.86 86.8439   6
  -2   9 -12 3195.94 89.3312   3
  -2  -9 -12 3219.75 100.213   1
  -2   9 -12 3348.70 100.931   1
  -2   9 -12 3352.24 102.601   4
   2   9  13 686.192 26.5849   6
  -2   9 -13 687.323 28.3677   3
  -2   9 -13 686.458 36.3133   1
  -2  -9 -13 635.618 35.4056   1
  -2   9 -13 706.768 37.4143   4
   2  -9  14 276.404 24.3093   6
   2   9  14 219.381 14.2234   6
  -2   9 -14 218.655 21.1936   4
  -2   9 -14 250.340 16.0276   3
  -2   9 -14 216.942 21.1287   1
  -2  -9 -14 205.421 21.1635   1
   2  -9  15 88.2900 16.1009   6
   2   9  15 77.5671 13.1081   5
   2   9  15 58.7506 8.54053   6
  -2   9 -15 106.832 15.4233   1
  -2  -9 -15 87.6375 14.0252   1
  -2   9 -15 65.2441 9.39504   3
   2  -9  16 10.4789 11.8059   6
   2   9  16 1.28880 8.51294   5
   2   9  16 13.1461 6.61653   6
  -2  -9 -16 4.85125 10.8066   1
  -2   9 -16 17.4509 11.0839   1
  -2   9 -16 7.42862 5.76807   3
   2   9  17 5.08494 6.74338   6
   2  -9  17 5.46436 12.3110   6
   2   9  17-5.40683 10.5793   5
  -2   9 -17 0.73255 5.97144   3
  -2  -9 -17-6.78692 12.5864   1
  -2   9 -17-6.69171 12.0535   1
  -2  -9 -18 780.841 44.1096   1
  -2   9 -18 825.608 45.2985   1
   2   9  18 752.269 30.8885   6
   2   9  18 804.941 39.7304   5
  -2   9 -19 261.760 26.5077   1
  -2  -9 -19 258.259 26.4833   1
   2   9  19 253.315 23.1338   5
   2  10 -19-1.54800 10.1003   3
   2 -10 -19 17.4189 11.2258   1
   2  10 -19 1.79688 11.7241   1
   2 -10 -19-2.14041 13.4447   2
   2  10 -19 11.6744 11.5609   2
   2  10 -18 975.963 46.1819   3
   2  10 -18 971.261 49.1016   1
   2 -10 -18 964.884 48.6529   1
   2 -10 -18 953.205 52.2812   2
   2  10 -18 868.497 48.5168   2
   2  10 -17 394.353 27.7497   3
   2 -10 -17 464.664 31.5831   1
   2  10 -17 374.112 29.7839   1
   2 -10 -17 378.907 31.9165   2
   2  10 -17 355.681 29.2418   2
   2  10 -16 4.28778 7.70670   3
   2 -10 -16 7.49963 11.6210   2
   2  10 -16 1.65480 9.53869   2
   2  10 -15 135.642 18.3732   2
   2 -10 -15 153.780 20.5907   2
   2  10 -15 175.546 20.2315   6
   2  10 -15 146.019 17.1791   3
   2 -10 -14 1389.39 58.0953   2
   2  10 -14 1271.57 54.0566   2
   2  10 -14 1257.15 55.1374   6
   2  10 -14 1278.59 53.0139   3
   2 -10 -13 225.325 21.3090   2
   2  10 -13 221.226 19.5665   2
   2  10 -13 200.540 21.0759   6
   2  10 -13 197.411 19.2983   3
   2  10 -12 4312.21 128.192   2
   2 -10 -12 4472.45 131.275   2
   2  10 -12 4547.38 130.211   3
   2  10 -12 4618.03 133.351   6
   2  10 -11 314.038 22.1350   4
   2 -10 -11 308.167 22.7787   2
   2  10 -11 320.234 22.2481   2
   2  10 -11 311.876 22.6568   3
   2  10 -11 304.879 24.1059   6
   2  10 -10 1431.07 51.8493   2
   2  10 -10 1327.41 50.9436   4
   2 -10 -10 1403.19 52.8592   2
   2  10 -10 1318.75 52.6579   3
   2  10  -9 326.385 21.3106   4
   2  10  -9 332.178 23.0818   3
   2  10  -9 310.215 20.5746   2
   2 -10  -9 331.091 21.6302   2
   2  10  -8-3.08447 7.10538   4
   2 -10  -8 9.69036 6.24480   2
   2  10  -8 2.72295 5.54905   2
   2 -10  -8-1.14006 2.37025   6
   2  10  -8 2.37325 5.67119   3
   2 -10  -7 626.814 19.6464   6
   2 -10  -7 664.325 29.2050   2
   2  10  -7 675.426 28.7737   2
   2  10  -7 649.648 30.8204   4
   2  10  -6 1390.61 52.1249   3
   2 -10  -6 1288.76 37.2749   6
  -2  10   5 430.329 22.9769   2
   2  10  -5 453.357 25.9708   3
   2 -10  -5 444.673 16.8933   6
   2  10  -5 460.353 24.1366   4
   2  10  -4 3618.83 101.927   4
   2 -10  -4 3592.20 92.3322   6
  -2  10   4 3459.09 98.5378   2
   2 -10  -3 1223.44 48.1674   4
   2 -10  -3 1199.82 38.2034   6
  -2  10   3 1273.27 42.1030   2
  -2 -10   3 1350.95 43.0877   2
   2 -10  -2 491.277 27.2128   4
  -2 -10   2 527.587 22.3532   2
  -2  10   2 509.246 22.0456   2
   2 -10  -2 488.805 20.7740   6
   2 -10  -1 1.05039 4.28269   4
  -2 -10   1 8.33487 4.72996   4
  -2  10   1 10.2383 4.29972   2
  -2 -10   1 2.89436 3.00979   2
   2 -10  -1 5.37379 4.03729   6
   2 -10   0 1237.99 41.5809   6
  -2 -10   0 1215.61 43.9192   4
   2 -10   0 1348.01 49.1102   4
   2 -10   0 1256.33 39.6753   1
   2  10   0 1235.71 39.7088   1
   2  10   0 1260.74 47.3808   3
  -2 -10   0 1242.83 39.7602   2
  -2  10   0 1303.67 40.4261   2
   2 -10   1 1170.53 36.6634   1
   2  10   1 1105.80 36.6089   1
   2 -10   1 1152.62 39.7160   6
  -2 -10  -1 1111.47 36.3040   2
  -2  10  -1 1140.34 36.6371   2
  -2 -10  -1 1048.56 40.0953   4
   2 -10   1 1101.36 44.3248   4
  -2 -10  -2 2071.43 65.3642   4
   2 -10   2 2262.65 71.6010   4
   2 -10   2 2105.66 64.9014   6
   2 -10   2 2156.48 61.0111   1
   2  10   2 2158.24 61.1298   1
  -2  10  -3 74.9795 8.38961   5
   2 -10   3 103.350 11.1843   6
   2  10   3 81.1775 8.50038   1
   2 -10   3 78.4972 8.35857   1
  -2 -10  -3 73.4423 9.76307   4
  -2  10  -4 521.608 22.7447   5
   2 -10   4 520.697 25.7058   6
   2  10   4 479.927 21.9349   1
   2 -10   4 497.166 22.1099   1
  -2  10  -4 495.084 27.2661   4
  -2  10  -5 1084.05 38.6274   5
   2 -10   5 1101.33 42.1991   6
  -2  10  -5 1072.54 43.6777   4
   2 -10   5 1068.89 37.8465   1
   2  10   5 1050.95 37.6195   1
  -2  10  -6 19.4694 6.78166   5
  -2  10  -6 25.8282 8.42102   4
   2 -10   6 19.7620 8.08443   6
   2 -10   6 16.2457 5.81085   1
   2  10   6 22.4167 6.31792   1
  -2  10  -7 35.4069 8.64078   5
  -2  10  -7 34.8684 9.05445   4
   2 -10   7 31.8550 7.78858   1
   2  10   7 37.6483 7.98282   1
   2 -10   7 34.4068 8.94046   6
  -2  10  -8 1014.02 40.6753   5
  -2  10  -8 1058.43 41.1628   1
  -2  10  -8 1040.00 44.2668   4
   2 -10   8 1086.77 44.3157   6
   2 -10   8 1033.02 40.5007   1
   2  10   8 1027.08 40.2480   1
  -2  10  -9 334.605 21.9774   5
  -2 -10  -9 335.582 21.8131   1
  -2  10  -9 351.967 22.4007   1
  -2  10  -9 362.157 24.7150   4
   2 -10   9 376.188 25.0895   6
   2 -10   9 385.853 23.1395   1
   2  10   9 373.370 22.8917   1
  -2  10 -10 2257.48 72.6643   5
   2 -10  10 2312.42 76.8741   6
   2  10  10 2137.02 61.7261   6
  -2  10 -10 2134.62 66.5363   3
  -2  10 -10 2284.23 72.6729   1
  -2 -10 -10 2163.51 72.2066   1
  -2  10 -10 2243.34 75.9872   4
   2  10  11 771.503 28.0031   6
  -2  10 -11 782.884 31.8686   3
  -2  10 -11 748.985 36.1007   1
  -2 -10 -11 820.314 37.7521   1
  -2  10 -11 784.313 39.1090   4
   2  10  12 137.159 10.6430   6
  -2  10 -12 138.871 12.8331   3
  -2 -10 -12 135.798 16.0871   1
  -2  10 -12 153.513 17.2253   1
  -2  10 -12 150.882 17.3422   4
   2  10  13 504.627 21.2194   6
  -2  10 -13 517.138 32.2563   4
  -2  10 -13 500.731 24.4831   3
  -2 -10 -13 535.370 31.3208   1
  -2  10 -13 528.206 31.3945   1
  -2  10 -14 41.5858 11.6940   4
  -2  10 -14 51.1236 9.22768   3
   2  10  14 47.5704 7.20401   6
  -2  10 -14 62.5226 12.9998   1
  -2 -10 -14 49.4908 12.2831   1
  -2  10 -15 57.2671 13.4663   4
  -2  10 -15 88.5969 11.0618   3
  -2  10 -15 66.0959 13.9571   1
  -2 -10 -15 78.4388 14.7923   1
   2  10  15 66.8179 8.72715   6
   2  10  16 479.899 29.0963   5
  -2  10 -16 459.444 31.7821   4
   2  10  16 387.456 19.5388   6
   2 -10  16 496.264 34.7636   6
  -2  10 -16 418.352 22.6473   3
  -2  10 -16 424.691 30.6734   1
  -2 -10 -16 432.937 31.1904   1
   2  10  17 22.6052 7.11573   6
  -2  10 -17 24.9520 12.8078   1
  -2 -10 -17 13.5393 11.9593   1
  -2  10 -17 21.2775 7.66094   3
   2  10  17 43.0956 12.5880   5
  -2  10 -17 19.7378 11.7438   4
   2  10  18 863.938 42.2731   5
  -2  10 -18 934.376 48.5836   1
  -2 -10 -18 880.061 47.9761   1
   2  10  19 409.582 28.7073   5
   2  11 -19 116.661 19.2873   1
   2 -11 -19 129.019 19.8951   1
   2  11 -19 125.028 19.7162   2
   2 -11 -19 149.752 22.5281   2
   2  11 -18 335.928 26.6982   3
   2  11 -18 313.774 27.7533   1
   2 -11 -18 296.801 26.9309   1
   2 -11 -18 314.835 30.0263   2
   2  11 -18 335.419 28.8097   2
   2  11 -17-1.51341 8.58594   3
   2  11 -17 1.62471 11.3494   1
   2 -11 -17 1.58198 10.3215   1
   2  11 -17 5.13092 10.1617   2
   2 -11 -17 1.94345 11.8816   2
   2  11 -16 30.0458 12.3964   6
   2  11 -16 26.6408 9.79144   3
   2 -11 -16 16.5935 10.3280   1
   2  11 -16 27.8543 11.9191   1
   2 -11 -16 25.8048 13.1601   2
   2  11 -16 30.7168 11.0663   2
   2  11 -15 13.0075 10.6087   6
   2  11 -15 4.34852 8.09016   3
   2 -11 -15 4.29830 10.2197   1
   2 -11 -15-1.73389 9.99454   2
   2  11 -15 1.51982 9.42022   2
   2  11 -14 1287.87 55.0411   4
   2 -11 -14 1467.23 59.5063   2
   2  11 -14 1345.32 55.2888   2
   2  11 -14 1265.27 53.9987   3
   2  11 -14 1363.21 57.7916   6
   2  11 -13 314.108 23.8384   4
   2 -11 -13 297.416 24.2354   2
   2  11 -13 281.775 22.7335   2
   2  11 -13 274.469 22.9959   3
   2  11 -13 309.154 25.5364   6
   2  11 -12 48.2139 10.6849   4
   2 -11 -12 55.9269 12.1438   2
   2  11 -12 43.4786 10.2704   2
   2  11 -12 53.8243 12.8888   6
   2  11 -12 54.7813 11.7326   3
   2  11 -11 6.13869 7.51115   4
   2 -11 -11 19.2115 9.04579   2
   2  11 -11 8.07068 6.75444   2
   2  11 -11 21.6989 10.0010   6
   2  11 -11 13.3856 8.41233   3
   2  11 -10 485.966 30.0461   6
   2  11 -10 460.013 27.2675   4
   2  11 -10 527.245 30.1530   3
   2 -11 -10 491.335 27.8617   2
   2  11 -10 454.562 25.8672   2
   2  11  -9 44.4260 10.1040   4
   2 -11  -9 40.1232 9.97175   2
   2  11  -9 47.7887 9.53491   2
   2  11  -9 46.4563 10.8115   3
   2  11  -8 369.782 23.4491   4
   2  11  -8 327.383 23.5274   3
   2  11  -8 367.089 20.7870   2
   2 -11  -8 383.039 21.7934   2
   2  11  -7 1.06691 6.87598   4
   2  11  -7 10.7279 5.41006   2
   2 -11  -7 2.85163 2.56371   6
   2  11  -7-1.23229 6.87782   3
   2  11  -6 4095.71 113.562   3
   2  11  -6 4039.09 109.528   4
   2  11  -5 785.621 36.7636   3
   2  11  -5 834.121 34.9126   4
   2 -11  -5 724.793 24.3803   6
   2 -11  -4 204.977 11.3385   6
  -2  11   4 186.166 13.7292   2
   2 -11  -3 1.19568 7.20783   4
  -2  11   3 1.98007 4.41022   2
  -2 -11   3 1.40748 5.01966   2
   2 -11  -3 2.01578 4.10812   6
   2 -11  -2 31.4413 8.33048   4
   2 -11  -2 34.6516 6.26688   6
  -2  11   2 15.6991 5.22359   2
  -2 -11   2 37.8840 6.54126   2
  -2 -11   1 754.290 33.4335   4
   2 -11  -1 859.831 37.9818   4
  -2 -11   1 811.022 28.9564   2
  -2  11   1 794.661 28.4863   2
   2 -11  -1 784.346 29.7396   6
   2 -11  -1 803.727 28.0648   1
   2  11  -1 769.082 27.7693   1
   2 -11   0 2249.32 65.4711   6
  -2 -11   0 2134.22 61.9631   2
  -2  11   0 2255.19 62.5098   2
  -2 -11   0 2309.27 69.7624   4
   2 -11   0 2174.49 73.3490   4
   2  11   0 2329.35 73.9968   3
   2 -11   0 2203.33 61.3519   1
   2  11   0 2206.96 61.7156   1
   2 -11   1 32.5882 8.65936   4
  -2 -11  -1 44.6025 7.21534   4
  -2  11  -1 30.3554 5.25330   2
  -2 -11  -1 29.2504 5.52165   2
   2 -11   1 24.8310 5.22238   1
   2  11   1 23.7639 4.95980   1
   2 -11   1 28.8571 7.57140   6
  -2  11  -2 1135.17 35.9418   5
   2 -11   2 1106.63 40.1985   6
   2  11   2 1060.26 35.3227   1
   2 -11   2 1094.25 35.4954   1
   2 -11   2 1035.05 44.6299   4
  -2 -11  -2 1075.27 41.0771   4
  -2  11  -3 522.362 22.6470   5
  -2 -11  -3 570.610 27.2063   4
   2 -11   3 552.667 26.4635   6
   2  11   3 508.478 21.9366   1
   2 -11   3 518.784 22.0197   1
  -2  11  -4 4.82490 5.02029   5
  -2 -11  -4 12.1355 6.24104   4
   2  11   4 9.39291 4.77967   1
   2 -11   4 9.89311 4.50453   1
   2 -11   4 15.3301 7.81321   6
   2  11   5 1.37480 4.53985   1
   2 -11   5 2.05082 5.02349   1
   2 -11   5 3.07163 7.07620   6
  -2  11  -5 6.11409 5.77576   5
  -2  11  -5 5.89372 6.46840   4
   2 -11   6 79.5698 9.82182   1
   2  11   6 98.9394 10.4271   1
   2 -11   6 85.2959 12.4479   6
  -2  11  -6 70.4979 10.2176   5
  -2  11  -6 73.1973 11.7485   4
  -2  11  -7 1053.28 39.2588   5
   2 -11   7 922.249 40.8502   6
   2 -11   7 887.451 36.3359   1
   2  11   7 947.607 36.8099   1
  -2  11  -7 980.214 43.0813   4
  -2  11  -8 4159.16 114.648   5
  -2  11  -8 4120.92 119.908   4
   2 -11   8 4302.70 120.139   6
   2  11   8 3877.80 111.798   1
   2 -11   8 3941.79 112.364   1
  -2  11  -9 35.0898 10.1078   5
  -2  11  -9 47.4709 10.9710   4
  -2  11  -9 45.8500 9.85601   1
   2 -11   9 74.9947 13.1131   6
  -2  11 -10 545.445 28.9516   5
  -2  11 -10 508.760 30.6703   4
   2 -11  10 476.343 30.1763   6
   2  11  10 501.416 20.4341   6
  -2  11 -10 477.246 24.8936   3
  -2 -11 -10 452.574 26.5377   1
  -2  11 -10 472.496 26.8665   1
   2 -11  11 126.850 16.8101   6
   2  11  11 121.370 9.60674   6
  -2  11 -11 114.036 15.0170   5
  -2  11 -11 136.609 16.5941   4
  -2  11 -11 146.849 15.6455   1
  -2 -11 -11 93.9383 13.6457   1
  -2  11 -11 91.8941 11.4291   3
   2  11  12 0.97863 4.70370   6
   2 -11  12-1.54871 9.59890   6
  -2  11 -12 2.98397 8.18681   4
  -2  11 -12 2.72920 5.93552   3
  -2  11 -12-1.22579 8.19034   1
  -2 -11 -12 1.27576 8.81657   1
  -2  11 -13 80.3529 14.6680   4
  -2  11 -13 48.5579 9.48527   3
  -2  11 -13 58.9973 12.6092   1
  -2 -11 -13 60.9029 12.7905   1
   2  11  13 64.4998 7.62304   6
   2  11  14 1055.91 34.2717   6
  -2  11 -14 1140.70 51.6886   4
  -2  11 -14 1069.34 41.0757   3
  -2  11 -14 1181.91 49.7075   1
  -2 -11 -14 1050.28 48.0652   1
  -2  11 -15 8.20997 10.1783   4
   2  11  15 12.8193 5.96776   6
  -2  11 -15 2.74962 7.41439   3
  -2  11 -15 10.3892 11.3180   1
  -2 -11 -15-3.02413 10.6755   1
   2  11  16 1763.66 65.3701   5
  -2  11 -16 1878.38 72.7999   4
  -2  11 -16 1843.26 70.8043   1
  -2 -11 -16 1837.78 70.8249   1
  -2  11 -16 1817.04 59.6916   3
  -2  11 -17 33.1728 12.8903   1
  -2 -11 -17 55.3216 15.2945   1
   2  11  17 17.4833 10.5493   5
  -2  11 -18 92.4553 18.5192   1
  -2 -11 -18 107.254 18.9200   1
   2  11  18 92.2642 15.9670   5
   2  11  19 25.4640 11.8133   5
   2  12 -19 8.64794 12.0845   1
   2 -12 -19 6.78514 12.8205   1
   2 -12 -19 18.5590 12.9547   2
   2  12 -19 9.19982 10.6083   2
   2  12 -18 373.332 29.7199   1
   2 -12 -18 348.084 28.8965   1
   2 -12 -18 359.832 31.6242   2
   2  12 -18 366.407 29.7580   2
   2  12 -17 189.713 21.3360   2
   2 -12 -17 256.769 26.1888   2
   2  12 -17 189.847 20.9813   3
   2  12 -17 195.029 22.2739   1
   2 -12 -17 189.514 21.8408   1
   2  12 -16 1639.13 66.1222   2
   2 -12 -16 1778.30 71.5470   2
   2  12 -16 1681.34 68.5378   4
   2  12 -16 1734.23 67.0949   3
   2  12 -16 1725.36 67.1545   1
   2 -12 -16 1773.00 67.3505   1
   2  12 -15 6.66163 10.7327   6
   2  12 -15 4.79458 9.49574   4
   2  12 -15 12.1690 8.34690   3
   2  12 -15-5.94212 9.33111   2
   2 -12 -15 1.71482 10.6286   2
   2 -12 -15 4.23258 9.96009   1
   2  12 -15-1.43579 11.9753   1
   2  12 -14 1224.83 56.2440   6
   2 -12 -14 1415.22 58.3775   2
   2  12 -14 1318.46 54.0440   2
   2  12 -14 1227.84 54.1046   4
   2  12 -14 1295.28 55.0500   3
   2 -12 -14 1299.52 53.1818   1
   2  12 -13 137.241 16.9332   4
   2 -12 -13 136.316 17.7626   2
   2  12 -13 134.112 16.6657   2
   2  12 -13 165.249 18.6300   3
   2  12 -13 131.159 18.2862   6
   2  12 -12 12.1079 8.11248   4
   2  12 -12 16.9644 10.5435   6
   2  12 -12 8.64685 8.43809   3
   2 -12 -12 8.27890 8.89445   2
   2  12 -12 3.65150 7.34019   2
   2  12 -11 247.734 22.7028   6
   2  12 -11 256.128 22.2188   3
   2  12 -11 254.164 19.7310   2
   2 -12 -11 260.921 21.2353   2
   2  12 -11 221.197 20.3125   4
   2  12 -10 1090.80 49.4431   6
   2  12 -10 1149.22 49.2066   3
   2  12 -10 1165.17 44.6122   2
   2 -12 -10 1156.88 46.0138   2
   2  12 -10 1072.87 46.2831   4
   2  12  -9 544.361 32.3468   6
   2  12  -9 604.538 33.1034   3
   2 -12  -9 575.729 28.7221   2
   2  12  -9 576.352 27.6415   2
   2  12  -9 506.871 29.3336   4
   2  12  -8 3198.81 102.370   3
   2 -12  -8 3515.76 95.7116   2
   2  12  -8 3305.96 93.2451   2
   2  12  -8 3181.06 99.0275   4
   2  12  -7 701.071 33.9191   4
   2  12  -7 694.672 36.0115   3
   2  12  -6 1641.38 58.5277   4
   2  12  -6 1666.84 61.8961   3
   2  12  -5 169.009 15.9130   4
   2 -12  -5 159.564 9.49122   6
   2  12  -5 188.218 18.0303   3
   2 -12  -4 170.665 10.7255   6
   2 -12  -4 176.009 17.8644   4
   2 -12  -3 1806.63 52.7238   6
  -2  12   3 1830.33 54.8547   2
   2 -12  -3 1819.76 65.7326   4
  -2  12   2 1861.36 55.9450   2
  -2 -12   2 1994.27 57.6453   2
   2 -12  -2 2000.63 68.6517   4
   2 -12  -2 1938.96 56.7767   6
   2  12  -2 1882.84 54.6635   1
   2 -12  -2 1935.28 54.6749   1
   2  12  -1 31.7848 9.51204   3
   2 -12  -1 23.5749 6.76047   6
  -2 -12   1 33.8475 8.25856   4
   2 -12  -1 41.1053 8.91164   4
  -2 -12   1 29.9477 5.90935   2
  -2  12   1 34.6315 5.69249   2
   2 -12  -1 28.8634 5.34505   1
   2  12  -1 27.4805 4.97227   1
   2 -12   0 2425.99 69.9658   6
  -2  12   0 2386.12 65.4246   2
  -2 -12   0 2341.33 65.7164   2
  -2 -12   0 2403.50 74.6929   4
   2 -12   0 2431.63 79.4017   4
   2  12   0 2472.56 79.5933   3
   2  12   0 2312.63 64.2742   1
   2 -12   0 2381.32 64.0322   1
   2 -12   1 1204.33 42.2571   6
  -2  12  -1 1239.25 37.1257   5
   2  12   1 1130.15 36.2373   1
   2 -12   1 1195.26 48.8218   4
  -2 -12  -1 1248.42 45.7408   4
   2 -12   1 1169.68 36.2896   1
  -2 -12  -1 1137.53 36.9695   2
  -2  12  -1 1167.08 37.1562   2
   2 -12   2 292.158 18.3256   6
   2 -12   2 235.066 19.8419   4
  -2 -12  -2 262.540 18.2755   4
  -2  12  -2 269.520 14.7804   5
   2  12   2 262.069 13.6487   1
   2 -12   2 233.958 12.9263   1
  -2  12  -2 258.673 13.6216   2
  -2 -12  -2 239.719 13.2964   2
  -2 -12  -3 318.158 20.3178   4
  -2  12  -3 314.336 17.0624   5
   2 -12   3 314.405 15.6301   1
   2  12   3 286.037 15.4096   1
   2 -12   3 338.465 20.6051   6
  -2 -12  -4 1309.65 48.3465   4
  -2  12  -4 1365.23 44.6029   5
   2 -12   4 1330.38 41.9745   1
   2  12   4 1237.92 41.3353   1
   2 -12   4 1331.71 48.6755   6
  -2 -12  -5 1499.33 53.2957   4
  -2  12  -5 1543.38 50.1509   5
   2 -12   5 1445.26 47.0619   1
   2  12   5 1397.84 46.8102   1
   2 -12   5 1590.10 55.0578   6
  -2  12  -6 1208.52 49.0408   4
  -2  12  -6 1166.24 42.5269   5
   2 -12   6 1123.18 45.7223   6
   2 -12   6 1097.04 39.8157   1
   2  12   6 1120.49 39.6811   1
  -2  12  -7 72.2252 12.8187   4
  -2  12  -7 87.0560 12.0974   5
   2  12   7 82.1855 10.4774   1
   2 -12   7 67.6804 12.2868   6
  -2  12  -8 294.366 20.7266   5
   2 -12   8 315.285 23.4455   6
  -2  12  -8 271.175 22.5397   4
  -2  12  -9 149.543 15.8902   5
   2 -12   9 131.243 16.5028   6
  -2  12  -9 109.935 15.1644   4
  -2  12 -10-2.87758 7.47587   4
  -2  12 -10-6.98547 9.71064   5
   2 -12  10 18.8959 9.71235   6
  -2  12 -10 12.2220 6.22737   3
   2  12  10 4.70054 4.12104   6
  -2  12 -11 419.961 26.5347   5
   2 -12  11 421.754 29.3064   6
   2  12  11 396.670 17.0413   6
  -2  12 -11 407.052 28.4925   4
  -2  12 -11 384.228 23.3543   3
  -2  12 -11 395.461 24.9658   1
  -2 -12 -11 410.506 25.5574   1
  -2  12 -12 743.913 36.9851   5
  -2  12 -12 672.074 38.6053   4
  -2  12 -12 710.489 35.4688   1
  -2 -12 -12 721.499 36.1235   1
  -2  12 -12 696.097 32.1805   3
   2 -12  12 826.677 41.7365   6
   2  12  12 667.924 23.8893   6
  -2  12 -13 271.810 25.1372   4
  -2  12 -13 240.070 21.2010   1
  -2 -12 -13 233.454 21.7676   1
  -2  12 -13 232.976 18.3246   3
   2 -12  13 281.543 25.6911   6
   2  12  13 215.775 11.8643   6
  -2  12 -14 1043.54 49.1868   4
  -2  12 -14 966.228 44.2247   1
  -2 -12 -14 976.844 44.5612   1
  -2  12 -14 934.944 38.0817   3
  -2  12 -15 35.9471 12.4693   4
  -2 -12 -15 17.8455 10.7302   1
  -2  12 -15 18.8886 9.94815   1
  -2  12 -15 30.0262 9.13986   3
   2  12  16 1.31123 9.90879   5
  -2  12 -16-4.62037 11.9516   1
  -2 -12 -16 9.41566 10.1132   1
  -2  12 -16 6.93598 8.20256   3
   2  12  17 21.4846 11.4523   5
  -2 -12 -17 16.4896 13.2341   1
  -2  12 -17 6.50125 13.2530   1
   2  12  18-1.37894 10.7017   5
  -2 -12 -18-15.4826 15.3822   1
  -2  12 -18-6.85332 16.0011   1
   2 -13 -19 233.924 26.7807   2
   2  13 -19 244.688 25.3973   2
   2  13 -19 225.649 24.3322   1
   2 -13 -19 236.991 24.6551   1
   2  13 -18 663.908 39.9606   2
   2 -13 -18 712.853 44.4138   2
   2  13 -18 679.017 40.2983   1
   2 -13 -18 668.903 39.6666   1
   2  13 -17 187.405 21.5834   2
   2 -13 -17 161.123 21.6408   2
   2  13 -17 188.150 20.9557   1
   2 -13 -17 171.117 20.5221   1
   2 -13 -16 148.490 20.4749   2
   2  13 -16 146.744 18.4379   2
   2  13 -16 126.376 17.4994   1
   2 -13 -16 147.000 18.3898   1
   2  13 -15 17.8119 10.8258   4
   2  13 -15 19.0965 10.6396   3
   2  13 -15 8.30400 10.1761   1
   2 -13 -15 9.64114 9.83084   1
   2 -13 -15 16.9069 11.5623   2
   2  13 -15 29.2798 11.1692   2
   2  13 -14 516.036 31.7184   1
   2 -13 -14 572.569 32.6902   1
   2  13 -14 545.767 34.1621   4
   2  13 -14 674.090 39.0887   6
   2  13 -14 566.286 35.1054   3
   2  13 -14 580.080 33.2130   2
   2 -13 -14 610.146 36.3294   2
   2  13 -13 242.302 20.4261   1
   2 -13 -13 232.044 20.7343   1
   2  13 -13 222.152 23.1153   6
   2  13 -13 227.551 21.8870   4
   2  13 -13 223.392 22.5244   3
   2 -13 -13 280.115 23.7271   2
   2  13 -13 231.154 20.5457   2
   2  13 -12 17.3368 11.3578   6
   2  13 -12 7.05902 8.51349   4
   2  13 -12 6.07281 9.28446   3
   2 -13 -12 6.88743 7.84944   1
   2 -13 -12 5.47524 8.37141   2
   2  13 -12 19.0442 8.40556   2
   2  13 -11 434.699 30.5338   6
   2  13 -11 390.247 28.5083   3
   2 -13 -11 460.029 27.6998   2
   2  13 -11 449.753 26.0241   2
   2  13 -11 410.790 27.7602   4
   2  13 -10 1388.44 58.1344   6
   2  13 -10 1403.78 55.6775   4
   2  13 -10 1459.46 58.7480   3
   2  13 -10 1424.60 50.9991   2
   2 -13 -10 1525.93 53.9672   2
   2  13  -9 52.5606 10.9960   4
   2  13  -9 50.0884 12.1734   6
   2  13  -9 45.1946 11.8531   3
   2 -13  -9 57.3697 10.2727   2
   2  13  -9 56.0249 9.12315   2
   2  13  -8 190.151 19.2938   3
   2  13  -8 171.178 18.6047   6
   2  13  -8 161.391 17.1823   4
   2  13  -7 128.211 16.3877   3
   2  13  -7 131.839 15.6715   4
   2  13  -6 66.6021 12.3710   3
   2  13  -6 89.2261 13.1751   4
   2 -13  -5 1104.66 50.3521   4
   2  13  -5 1170.14 49.5983   3
   2 -13  -4 807.671 40.5818   4
   2 -13  -3 303.872 23.0959   4
   2 -13  -3 278.557 15.1844   6
   2 -13  -2 1050.01 46.1087   4
  -2  13   2 988.762 33.5921   2
   2  13  -2 997.275 32.0234   1
   2 -13  -2 1029.94 31.8173   1
   2 -13  -2 1065.82 36.1001   6
   2 -13  -1 73.2017 9.66449   6
   2 -13  -1 74.3483 12.1267   4
  -2  13   1 74.5526 7.84940   2
  -2 -13   1 75.7174 7.82640   2
   2 -13  -1 75.3588 6.73598   1
   2  13  -1 70.7374 6.75061   1
   2  13  -1 75.4551 12.6229   3
   2 -13   0 6.38134 5.91934   6
  -2 -13   0 12.1560 4.25891   2
  -2  13   0 1.42089 4.47841   2
  -2 -13   0 3.31067 6.36299   4
   2 -13   0 10.8318 7.55823   4
   2  13   0 13.1535 7.81673   3
   2 -13   0 9.02497 3.47350   1
   2  13   0 6.88698 3.12074   1
  -2  13  -1 429.033 17.7970   5
  -2 -13  -1 342.117 15.9664   2
  -2  13  -1 360.338 16.0145   2
   2  13   1 343.391 15.3264   1
   2 -13   1 335.321 14.7985   1
   2 -13   1 427.997 22.1418   6
   2 -13   1 367.463 25.7384   4
  -2 -13  -1 350.688 22.9243   4
  -2 -13  -2-4.49059 5.33221   2
  -2  13  -2-1.47671 4.51407   2
  -2  13  -2 0.58966 4.84405   5
  -2 -13  -2 21.9944 6.99784   4
   2 -13   2-1.38274 7.97014   4
   2  13   2 0.90502 4.01965   1
   2 -13   2-0.42858 3.95446   1
   2 -13   2 5.62879 7.27994   6
  -2  13  -3 836.374 30.5019   5
   2 -13   3 803.514 34.4963   6
  -2 -13  -3 744.289 34.5051   4
   2 -13   3 743.703 26.3358   1
   2  13   3 767.341 26.6704   1
  -2  13  -3 744.622 26.4404   2
  -2 -13  -4 1869.72 63.9054   4
  -2  13  -4 2025.75 59.4690   5
   2 -13   4 1813.81 54.6134   1
   2  13   4 1787.11 54.7443   1
   2 -13   4 2036.27 65.0652   6
  -2 -13  -5 23.7467 7.73344   4
  -2  13  -5 4.97551 6.97233   5
   2 -13   5 9.17872 7.58071   6
   2  13   5 5.76058 5.22369   1
   2 -13   5 15.6766 5.64869   1
  -2  13  -6 489.772 30.0009   4
  -2  13  -6 499.351 25.4791   5
   2  13   6 477.622 22.6882   1
   2 -13   6 507.510 28.9069   6
  -2  13  -7 8.38632 8.43585   4
  -2  13  -7 18.5707 8.34278   5
   2 -13   7 30.9639 9.93367   6
  -2  13  -8 204.830 19.8786   4
   2 -13   8 216.803 20.3764   6
  -2  13  -8 211.429 17.8307   5
  -2  13  -9 76.8552 12.6536   5
  -2  13  -9 93.7635 15.0699   4
   2 -13   9 107.834 16.2467   6
  -2  13 -10 744.869 39.4514   4
   2 -13  10 755.559 39.2276   6
   2  13  10 672.078 23.7408   6
  -2  13 -10 633.685 32.2956   3
  -2  13 -10 739.510 35.5645   5
  -2  13 -11 257.146 23.7479   4
   2 -13  11 230.403 23.1431   6
   2  13  11 194.062 10.8932   6
  -2  13 -11 192.318 17.5627   3
  -2  13 -11 201.025 19.6378   5
  -2  13 -12 2988.18 90.3222   5
   2  13  12 2535.74 68.4229   6
  -2  13 -12 2936.72 94.7302   4
  -2  13 -12 2671.55 83.4857   3
  -2  13 -12 2856.60 86.3292   1
  -2 -13 -12 2803.24 86.8411   1
  -2  13 -13 1.66698 9.75852   4
   2  13  13 7.77680 4.11347   6
  -2  13 -13 6.50331 7.49193   3
  -2  13 -13 3.73222 8.69172   1
  -2 -13 -13 6.49713 8.37524   1
  -2  13 -14 135.304 14.7744   3
  -2  13 -14 148.400 17.7894   1
  -2 -13 -14 130.095 16.6954   1
  -2  13 -14 151.951 19.9302   4
  -2  13 -15-1.42024 11.1161   1
  -2  13 -15 7.57703 7.31668   3
   2  13  16 56.4587 13.6317   5
  -2 -13 -16 55.4382 14.5171   1
  -2  13 -16 46.6344 14.1007   1
   2  13  17 93.8320 15.7665   5
  -2  13 -17 90.5221 16.7075   1
  -2 -13 -17 83.8628 16.1473   1
  -2  13 -18 854.973 45.7686   1
  -2 -13 -18 757.340 43.9653   1
   2  13  18 752.257 40.0946   5
   2 -14 -19 9.86581 12.3958   2
   2 -14 -18 287.403 26.1123   1
   2 -14 -18 316.944 29.5997   2
   2 -14 -17 63.4837 15.0096   1
   2 -14 -17 82.3841 17.3003   2
   2  14 -17 103.629 16.5132   2
   2 -14 -16 35.1486 12.1042   1
   2  14 -16 37.2471 12.1249   1
   2  14 -16 36.2062 12.3298   2
   2 -14 -16 52.0597 15.0302   2
   2  14 -15-1.30879 11.7057   1
   2 -14 -15 13.3530 11.0573   1
   2 -14 -15 16.3809 10.4277   2
   2  14 -15 28.3367 10.4145   2
   2  14 -14 370.884 28.3319   4
   2 -14 -14 339.851 27.5063   2
   2  14 -14 323.293 24.3944   2
   2  14 -14 303.415 26.4475   3
   2  14 -14 299.596 23.6550   1
   2 -14 -14 289.615 23.9408   1
   2  14 -13 359.195 25.5278   1
   2 -14 -13 421.310 26.9740   1
   2  14 -13 363.026 28.4129   4
   2  14 -13 432.754 31.4816   6
   2  14 -13 423.985 30.3029   3
   2 -14 -13 487.448 30.7271   2
   2  14 -13 386.621 26.5478   2
   2  14 -12 363.487 24.4103   1
   2 -14 -12 409.329 25.5543   1
   2  14 -12 412.036 28.8148   4
   2  14 -12 397.033 29.8182   6
   2  14 -12 442.166 30.6669   3
   2 -14 -12 454.174 28.1343   2
   2  14 -12 419.448 25.4540   2
   2  14 -11 228.705 18.4176   1
   2 -14 -11 265.814 19.7237   1
   2  14 -11 236.135 21.7386   4
   2  14 -11 227.060 22.6747   6
   2  14 -11 250.424 23.3845   3
   2 -14 -11 240.667 20.1767   2
   2  14 -11 237.905 18.5696   2
   2 -14 -10 359.839 22.0828   1
   2  14 -10 347.737 26.9433   6
   2  14 -10 343.622 27.2057   3
   2  14 -10 330.022 20.5457   2
   2  14 -10 354.064 25.9709   4
   2  14  -9-4.40840 9.23021   6
   2  14  -9-3.08347 9.29402   3
   2  14  -9-1.35248 8.15321   4
   2  14  -8 36.6954 11.2707   6
   2  14  -8 48.6325 12.0314   3
   2  14  -8 38.4047 10.6661   4
   2  14  -7 1118.65 48.5294   6
   2  14  -7 1038.63 46.4207   4
   2  14  -6 124.630 16.2460   6
   2 -14  -6 84.0744 15.1983   4
   2  14  -6 87.2707 14.5488   3
   2 -14  -5-8.06641 10.7798   4
   2  14  -5 1.46174 7.88184   3
   2 -14  -4 457.166 30.5767   4
   2 -14  -3 542.966 32.4706   4
   2 -14  -3 520.414 18.9551   1
   2  14  -3 529.045 19.5473   1
   2 -14  -2 274.321 22.6263   4
   2  14  -2 243.647 11.6427   1
   2 -14  -2 254.234 11.1944   1
   2 -14  -1 32.1839 9.56656   4
   2  14  -1 19.9413 9.75755   3
   2 -14  -1 28.7794 3.90990   1
   2  14  -1 28.5167 4.16833   1
   2 -14   0 123.048 12.4727   6
  -2 -14   0 104.646 7.95691   2
  -2  14   0 114.519 8.17339   2
  -2 -14   0 120.445 13.6050   4
   2 -14   0 145.407 16.4766   4
   2 -14   0 101.902 6.53544   1
   2  14   0 92.8457 6.91954   1
   2  14   0 92.1742 14.9330   3
  -2  14  -1 2832.67 67.8623   5
  -2  14  -1 2441.34 63.5272   2
   2 -14   1 2679.29 84.9587   4
  -2 -14  -1 2780.10 80.8950   4
   2 -14   1 2216.29 60.8683   1
   2  14   1 2317.05 62.1457   1
   2 -14   1 2738.19 75.5113   6
  -2  14  -2 353.318 17.4187   5
  -2  14  -2 299.036 13.7563   2
  -2 -14  -2 246.391 13.0729   2
   2 -14   2 359.516 25.7471   4
  -2 -14  -2 373.636 23.4958   4
   2 -14   2 279.565 12.7095   1
   2  14   2 307.463 13.6074   1
   2 -14   2 337.851 21.3154   6
  -2  14  -3 147.554 12.2026   5
   2 -14   3 135.616 14.7555   6
  -2 -14  -3 143.411 14.9813   4
   2  14   3 117.611 9.07190   1
  -2  14  -3 135.199 9.52732   2
  -2 -14  -3 96.9752 8.55059   2
  -2 -14  -4 341.431 23.3538   4
  -2  14  -4 373.294 20.0882   5
  -2  14  -4 302.771 14.9755   2
  -2 -14  -4 279.808 14.5206   2
   2 -14   4 339.040 22.4177   6
  -2  14  -5 93.0860 11.5915   5
  -2 -14  -5 97.3505 14.2518   4
   2 -14   5 97.4064 13.9810   6
  -2  14  -6 31.6770 8.73177   5
  -2 -14  -6 28.5618 8.42553   4
   2 -14   6 39.5490 11.4306   6
  -2  14  -7 511.274 32.7970   4
  -2  14  -7 612.411 29.6958   5
   2 -14   7 554.235 32.2601   6
  -2  14  -8 352.317 26.7592   4
  -2  14  -8 331.284 22.3445   5
   2 -14   8 350.973 25.6340   6
  -2  14  -9 1016.74 49.7323   4
  -2  14  -9 1248.08 47.6913   5
  -2  14 -10 711.845 39.7402   4
  -2  14 -10 742.375 35.9086   5
  -2  14 -10 688.168 34.9458   3
   2  14  10 685.331 22.8041   6
   2  14  11 33.1625 4.76071   6
  -2  14 -11 27.5441 9.79121   3
  -2  14 -11 28.0930 11.0664   5
  -2  14 -11 48.7379 13.2645   4
  -2  14 -12 51.9236 11.0882   3
  -2  14 -12 48.4830 12.3347   5
  -2  14 -12 62.0114 13.8224   4
  -2  14 -13 10.8849 9.30807   1
  -2  14 -13 12.8666 8.17550   3
  -2 -14 -14 5.38101 9.19529   1
  -2  14 -14-1.28300 8.96255   1
  -2  14 -14 2.33190 7.60730   3
  -2 -14 -15 894.995 43.8596   1
  -2  14 -15 903.289 43.4005   1
  -2  14 -15 864.512 39.8572   3
  -2  14 -16 271.148 24.3759   1
  -2 -14 -16 255.041 24.1918   1
   2  14  16 238.342 22.1998   5
  -2 -14 -17 192.821 22.2587   1
   2  14  17 157.524 19.4974   5
  -2 -14 -18 98.0627 17.4985   1
   2 -15 -18 431.745 33.9719   2
   2 -15 -17 318.039 26.9233   1
   2 -15 -17 361.095 31.0691   2
   2 -15 -16 58.7214 15.2375   2
   2 -15 -16 44.2093 12.1864   1
   2 -15 -15 493.936 30.8332   1
   2 -15 -15 496.158 35.0295   2
   2  15 -15 506.423 31.6476   2
   2  15 -14 369.046 25.4808   1
   2 -15 -14 425.110 27.6964   1
   2 -15 -14 420.922 30.0850   2
   2  15 -14 404.181 27.2782   2
   2  15 -13 320.976 26.5358   4
   2 -15 -13 364.409 26.5010   2
   2  15 -13 328.940 23.5845   2
   2  15 -13 293.431 22.1650   1
   2 -15 -13 325.880 23.1794   1
   2  15 -12 64.1808 14.2962   6
   2  15 -12 62.2655 13.3840   4
   2  15 -12 60.5677 14.8124   3
   2  15 -12 50.5931 10.2034   1
   2 -15 -12 68.9495 11.4272   1
   2 -15 -12 79.1305 13.4547   2
   2  15 -12 50.6993 10.5291   2
   2  15 -11 291.430 24.7210   4
   2  15 -11 318.192 26.5123   6
   2  15 -11 303.773 26.6882   3
   2  15 -11 289.862 20.2227   1
   2 -15 -11 339.732 21.6405   1
   2  15 -10 711.172 39.2336   4
   2  15 -10 799.742 41.7851   6
   2  15 -10 758.672 41.9611   3
   2  15 -10 768.227 32.7910   1
   2 -15 -10 875.591 34.5467   1
   2  15  -9 1086.68 49.3969   4
   2  15  -9 1186.26 51.7392   6
   2  15  -9 1244.67 54.1138   3
   2  15  -9 1094.81 40.1272   1
   2  15  -8 30.9550 11.3100   4
   2  15  -8 36.0917 11.6033   6
   2  15  -8 37.0707 11.9760   3
   2 -15  -8 26.0421 6.43707   1
   2 -15  -7 844.689 45.9086   4
   2  15  -7 836.929 40.8570   6
   2  15  -7 795.916 42.3453   3
   2 -15  -7 837.341 30.3783   1
   2 -15  -6 925.488 47.5512   4
   2  15  -6 902.003 41.9878   6
   2  15  -6 897.260 44.4852   3
   2 -15  -6 873.096 30.2050   1
   2  15  -5 758.819 40.3115   3
   2 -15  -5 793.980 42.7179   4
   2  15  -5 696.540 35.9287   6
   2  15  -4 48.8457 6.00271   1
   2 -15  -4 52.7259 5.72039   1
   2 -15  -4 48.0687 12.9181   4
   2  15  -4 69.7103 12.6654   6
   2 -15  -3 685.512 19.9498   1
   2  15  -3 678.650 21.2962   1
   2 -15  -3 755.368 40.4347   4
   2  15  -2 139.530 7.12163   1
   2 -15  -2 193.112 19.7677   4
   2  15  -1 773.598 38.6847   3
   2 -15  -1 832.111 40.3686   4
   2  15   0 863.790 40.9476   3
  -2 -15   0 846.431 37.5639   4
   2 -15   0 840.720 40.7710   4
  -2  15  -1 382.883 17.8795   5
   2 -15   1 330.064 26.1022   4
  -2 -15  -1 356.400 24.5127   4
  -2  15  -2 494.050 20.4357   5
   2 -15   2 455.854 30.1446   4
  -2 -15  -2 483.945 27.8084   4
  -2  15  -3 564.339 23.9523   5
  -2 -15  -3 559.591 30.4922   4
  -2 -15  -4 523.232 29.4940   4
  -2  15  -4 554.435 25.0171   5
  -2  15  -4 477.836 18.5135   2
  -2 -15  -5 665.909 34.0928   4
  -2  15  -5 737.662 30.1861   5
  -2 -15  -6 50.2712 12.2326   4
  -2  15  -6 86.8636 12.3257   5
  -2 -15  -7 489.627 30.1780   4
  -2  15  -7 517.703 27.4671   5
  -2  15  -8 1642.01 64.9053   4
  -2  15  -8 1538.99 56.3521   5
  -2  15  -9 142.225 18.9940   4
  -2  15  -9 145.918 16.5558   5
  -2  15 -10 6.12483 9.17405   5
  -2  15 -10 6.59619 8.89321   4
   2  15  10 10.3196 3.49338   6
  -2  15 -10-1.30851 9.42969   3
  -2  15 -11 71.1770 12.9730   3
  -2  15 -11 77.7878 14.0912   5
  -2  15 -11 84.5921 15.6149   4
  -2  15 -12 154.033 17.0965   3
  -2  15 -12 139.255 17.6428   5
  -2  15 -13 189.827 18.7174   3
  -2  15 -14 223.482 20.2821   3
   2  15  16 746.014 38.6734   5
  -2 -15 -16 743.594 40.1350   1
   2 -16 -16 10.7411 10.4912   2
   2 -16 -15 40.1800 12.9464   2
   2 -16 -14-5.51629 8.63521   1
   2 -16 -14-1.31561 9.38411   2
   2 -16 -13 21.3401 9.57312   1
   2 -16 -13 48.1885 12.4786   2
   2  16 -12 31.5037 12.0411   4
   2 -16 -12 40.8317 9.49412   1
   2  16 -11 509.711 33.2513   4
   2 -16 -11 537.073 26.4518   1
   2  16 -11 501.314 34.5576   6
   2  16 -10 53.3141 12.7371   4
   2  16 -10 34.7348 13.5078   3
   2  16 -10 35.6620 8.10685   1
   2  16 -10 40.7147 12.5968   6
   2  16  -9 258.373 24.4200   6
   2  16  -9 242.142 22.9219   4
   2  16  -9 272.604 25.2756   3
   2  16  -9 256.997 15.9679   1
   2  16  -8 11.6505 10.4962   6
   2  16  -8-1.70302 8.85233   3
   2 -16  -8 20.1372 13.3003   4
   2 -16  -8 14.4883 5.59867   1
   2  16  -8 13.0733 5.65153   1
   2 -16  -7 775.935 44.8837   4
   2  16  -7 717.010 37.5724   6
   2  16  -7 745.690 41.4911   3
   2  16  -7 660.815 24.8061   1
   2 -16  -7 694.215 24.8356   1
   2  16  -6 18.8429 10.8862   6
   2 -16  -6 7.53473 11.8326   4
   2 -16  -6 7.75269 4.34679   1
   2  16  -6 2.69282 4.22412   1
   2  16  -6 6.65939 10.1793   3
   2 -16  -5 62.9450 4.88154   1
   2  16  -5 50.9516 5.54511   1
   2  16  -5 93.5809 14.9038   6
   2 -16  -5 71.1376 16.6845   4
   2  16  -5 58.9813 6.04148   1
   2 -16  -5 67.3337 5.08960   1
   2  16  -5 72.7416 14.7542   3
   2  16  -4 10.9640 9.03797   6
   2  16  -4 4.15868 2.16656   1
   2  16  -4 8.00994 2.33636   1
   2  16  -3 2158.42 72.8900   6
   2 -16  -3 2250.58 82.0698   4
   2  16  -2 90.9185 13.5800   6
   2 -16  -2 78.2058 14.2070   4
   2  16  -1 282.754 25.1824   3
   2  16  -1 293.762 20.8736   6
   2 -16  -1 298.785 26.0108   4
   2  16   0 30.2210 8.56084   6
   2 -16   0 24.8602 11.0860   4
  -2 -16   0 8.38657 10.0843   4
   2  16   0 27.5277 10.8319   3
  -2 -16  -1 142.368 17.2224   4
   2 -16   1 136.496 18.7730   4
  -2  16  -1 171.790 11.9037   5
  -2  16  -2 12.2359 6.66871   5
  -2 -16  -2 19.3868 9.88312   4
   2 -16   2 18.3840 11.6799   4
  -2 -16  -3 620.474 34.5803   4
  -2  16  -3 642.405 27.5459   5
  -2  16  -4 5.67837 6.86622   5
  -2  16  -4 3.25921 3.69279   2
  -2 -16  -4 0.38389 2.71079   2
  -2 -16  -5 2740.13 80.3056   4
  -2  16  -5 2828.97 71.3849   5
  -2 -16  -6 64.8978 13.3166   4
  -2 -16  -6 45.1854 6.74406   2
  -2 -16  -7 57.1339 13.0348   4
  -2  16  -7 81.7466 12.4892   5
   2  16   8 16.7537 4.97603   6
  -2 -16  -8 5.84613 10.7457   4
  -2  16  -8 28.7902 10.6511   5
  -2  16  -9-1.17648 8.39172   5
  -2 -16  -9-5.97504 10.9760   4
  -2  16 -10 2.48649 9.39598   5
  -2  16 -10 11.2489 10.1321   3
  -2  16 -11 442.514 30.0549   3
  -2  16 -11 513.135 30.8336   5
  -2  16 -12 2.76789 9.66788   5
  -2  16 -12 4.09818 9.94071   3
  -2  16 -13 282.147 23.5642   3
   2 -17 -11 715.416 29.9976   1
   2  17 -10 562.913 35.4690   4
   2  17 -10 568.031 36.0326   6
   2 -17  -9 314.427 16.5210   1
   2  17  -9 347.610 27.5527   6
   2 -17  -8 17.7782 5.20553   1
   2  17  -8 27.8619 11.8681   6
   2 -17  -7 500.119 17.0997   1
   2  17  -7 571.984 33.4325   6
   2  17  -7 581.584 37.1828   3
   2 -17  -7 502.160 16.7596   1
   2 -17  -7 626.659 41.6242   4
   2  17  -6 546.778 36.3815   3
   2  17  -6 533.753 32.2883   6
   2 -17  -6 537.299 38.9764   4
   2  17  -5 844.255 46.1329   3
   2  17  -5 889.577 41.4580   6
   2 -17  -5 920.837 50.5084   4
   2  17  -4 103.477 15.1387   6
   2 -17  -4 99.7871 18.2485   4
   2  17  -3 723.302 35.3205   6
   2 -17  -3 657.157 40.9316   4
   2  17  -2 244.503 20.0550   6
   2 -17  -2 259.758 24.9422   4
   2  17  -1 668.707 40.0332   3
   2  17  -1 643.093 31.9794   6
   2 -17  -1 709.301 40.9197   4
   2  17   0 470.882 33.4173   3
   2  17   0 547.062 27.9101   6
   2 -17   0 572.691 36.1709   4
  -2  17  -1 696.324 25.6529   5
   2  17   1 565.381 37.0187   3
   2  17   1 637.419 29.7809   6
  -2 -17  -1 586.823 35.3279   4
   2 -17   1 602.227 38.1228   4
  -2 -17  -2 168.039 19.6126   4
   2  17   2 149.430 14.4914   6
  -2  17  -2 182.981 13.6847   5
  -2 -17  -3 624.783 36.7978   4
  -2  17  -3 695.546 29.3006   5
  -2 -17  -4 561.797 34.5961   4
   2  17   4 592.470 26.3760   6
  -2  17  -4 630.392 27.9959   5
  -2 -17  -5 176.440 19.7750   4
  -2  17  -5 165.037 15.7244   5
   2  17   5 190.227 14.0211   6
  -2 -17  -6 4.28238 2.80366   2
  -2  17  -6 5.79622 7.75078   5
  -2 -17  -6-4.49825 10.6948   4
  -2 -17  -6-0.46438 2.78964   2
   2  17   6 3.83844 5.38841   6
  -2 -17  -7 499.853 31.9197   4
  -2  17  -7 579.207 28.2528   5
  -2 -17  -8 833.573 43.7863   4
  -2  17  -8 949.621 40.5915   5
  -2 -17  -9 367.841 29.4195   4
  -2  17  -9 459.267 28.1273   5
  -2  17 -10 8.75710 9.70812   5
  -2  17 -10-1.50578 9.70402   3
  -2  17 -11 136.851 18.1211   3
  -2  17 -11 157.831 18.5404   5
  -2  17 -12 223.273 21.8089   3
  -2  17 -12 228.983 22.4153   5
  -2  17 -13 34.3952 11.7087   3
   2  18  -8-1.47372 10.6182   6
   2  18  -7 437.792 30.3055   6
   2  18  -6 31.0973 11.7115   6
   2  18  -5 190.360 19.5230   6
   2  18  -4 18.4939 9.65894   6
   2  18  -3 338.670 24.1498   6
   2 -18  -3 316.307 29.7090   4
   2  18  -2 149.878 16.2819   6
   2 -18  -2 126.828 20.6035   4
   2 -18  -1 85.0193 18.0111   4
   2  18  -1 112.252 13.9772   6
   2  18  -1 109.378 17.9752   3
   2 -18   0 31.9671 14.1090   4
   2  18   0 40.3992 10.2789   6
   2  18   0 45.3895 13.9963   3
   2 -18   1 1169.59 57.5565   4
  -2 -18  -1 1175.12 53.5796   4
   2  18   1 1189.28 56.9277   3
   2  18   1 1309.04 46.3146   6
   2  18   2 4.24638 6.81435   6
  -2  18  -2-5.84173 7.03097   5
  -2 -18  -2-12.5064 12.6436   4
   2  18   3 120.588 12.6076   6
  -2  18  -3 103.098 11.6066   5
  -2 -18  -3 104.748 17.9876   4
  -2  18  -4-0.81704 7.25813   5
  -2 -18  -4-9.44631 13.4220   4
  -2  18  -5 16.0891 7.94669   5
  -2 -18  -5 11.0374 12.1343   4
  -2 -18  -6-4.75427 14.3526   4
  -2  18  -6 8.71208 8.82249   5
  -2  18  -7 464.457 26.7407   5
  -2 -18  -7 435.001 32.2016   4
  -2  18  -8 26.6606 10.8027   5
  -2 -18  -8-1.61761 16.0686   4
  -2  18  -9 835.554 38.9961   5
  -2 -18  -9 781.940 43.4403   4
  -2  18 -10 133.295 18.8565   3
  -2  18 -10 143.890 17.3518   5
  -2  18 -11 1.32306 9.90664   5
   2  19  -7 283.757 24.8487   6
   2  19  -6 29.8705 12.1591   6
   2  19  -5 362.856 26.5278   6
   2  19  -4 293.161 23.1637   6
   2  19  -3 237.494 20.6754   6
   2  19  -2 451.098 27.3074   6
   2  19  -1 84.6684 12.9711   6
   2  19   0 62.6518 11.2882   6
  -2 -19  -1 136.491 20.0963   4
  -2 -19  -3 311.315 28.3859   4
  -2 -19  -4 489.447 34.4162   4
  -2 -19  -5 153.728 21.6891   4
  -2 -19  -6 91.8490 18.3686   4
   2  20  -6 440.048 29.7762   6
   2  20  -5 55.5338 12.8892   6
   2  20  -4 20.8907 10.3365   6
   2  20  -3 397.891 26.8429   6
   3   0 -23 40.8855 12.8830   6
   3   0 -22 1.50415 10.9453   5
   3   0 -22-2.78015 10.6936   6
   3   0 -21 82.9505 15.1830   5
  -3   0  21 85.4228 15.9309   3
   3   0 -21 70.0109 15.1741   6
   3   0 -20-4.10085 10.2353   5
  -3   0  20-1.61887 10.4326   3
   3   0 -20 1.35626 9.16688   6
   3   0 -19 1362.38 69.2457   2
   3   0 -19 1461.87 57.5774   6
  -3   0  19 1388.60 59.5747   3
   3   0 -19 1560.01 58.9043   5
   3   0 -18 4.57442 10.1588   2
   3   0 -18 5.25603 9.56192   6
  -3   0  18-1.52297 9.31118   3
   3   0 -18 6.24152 8.34105   5
   3   0 -17 2240.30 91.5799   2
   3   0 -17 2418.56 79.0196   6
  -3   0  17 2330.74 82.0560   3
   3   0 -17 2350.67 77.1617   5
  -3   0  16 1.43650 8.27999   3
   3   0 -16-2.03019 10.3432   2
   3   0 -16-1.10936 7.23790   5
  -3   0  15 68.2082 12.4744   3
   3   0 -15 78.0677 15.8478   2
  -3   0  14 21.4102 8.40880   3
   3   0 -14-1.78045 9.25391   2
   3   0 -13 298.982 25.5960   2
   3   0 -12 1.57170 8.47427   2
   3   0 -11 4921.56 146.999   2
  -3   0  11 5299.01 152.556   2
  -3   0  10 1.12834 6.19154   3
  -3   0  10-3.09796 7.56948   2
   3   0 -10-4.17826 7.23633   2
  -3   0   9 5450.35 146.626   3
   3   0  -9 5207.56 150.675   2
  -3   0   9 5412.71 154.106   2
  -3   0   8-1.02020 5.19773   3
  -3   0   8-2.68560 6.11904   2
   3   0  -8-1.25109 6.98242   2
   3   0  -7 269.751 19.9182   2
  -3   0   7 248.535 18.1321   3
  -3   0   6 1.81116 4.12713   3
   3   0  -6 5.42403 6.25318   2
  -3   0   5 63.4830 8.99791   3
  -3   0   4 3.93346 4.67491   3
  -3   0   3 7124.61 179.613   3
  -3   0   2 1.33397 3.96293   3
   3   0  -1 1130.33 29.2468   4
  -3   0   1 1181.38 38.5803   3
  -3   0   0-1.10216 3.41566   3
  -3   0  -1 82.1731 7.49699   3
  -3   0  -2-0.43859 2.99790   3
   3   0   2 6.73015 6.03906   1
  -3   0  -3 5287.72 125.368   4
  -3   0  -3 5077.59 127.860   3
   3   0   3 5297.54 141.514   1
   3   0   4 5.01667 6.46590   1
  -3   0  -4 0.65681 3.17470   3
  -3   0  -5 7412.38 174.015   3
   3   0   5 7048.98 190.009   1
   3   0   6 1.05568 6.27227   1
   3   0   7 595.766 30.4039   1
   3   0   8 8.34079 6.86893   1
  -3   0  -8-11.7065 7.49820   1
   3   0   9 288.819 21.5806   1
   3   0   9 290.256 19.7704   6
  -3   0  -9 321.295 23.7134   1
   3   0  10-2.07502 6.68612   6
  -3   0 -10 5.78089 8.06577   1
   3   0  10 3.95803 7.23948   1
  -3   0 -11 4445.24 129.653   1
   3   0  11 4314.76 126.367   1
   3   0  11 4078.21 119.454   6
   3   0  12 2.32948 7.50612   5
   3   0  12-5.86451 8.18253   1
   3   0  12-1.13261 7.29904   6
  -3   0 -12-1.59790 9.06533   1
   3   0  13 151.513 16.4642   5
  -3   0 -13 146.483 18.8183   1
   3   0  13 161.521 18.4601   1
   3   0  13 162.141 16.4528   6
   3   0  14-1.28246 8.05691   5
   3   0  14 3.31187 9.24309   1
   3   0  14 7.31789 8.15081   6
  -3   0 -14 26.5085 10.1876   1
   3   0  15 1586.82 60.9651   5
   3   0  15 1642.20 67.5719   1
   3   0  15 1635.20 60.3724   6
  -3   0 -15 1660.37 69.4854   1
   3   0  16-3.70502 10.6781   1
   3   0  16 7.06910 8.88079   5
   3   0  16 5.29653 8.74424   6
  -3   0 -16 3.89901 10.8804   1
   3   0  17 19.2260 10.8692   5
   3   0  17 2.74748 8.63186   6
  -3   0 -17 16.3330 11.9527   1
   3   0  18-1.43082 9.67091   6
   3   0  18 3.04472 9.43568   5
  -3   0 -18-8.52667 13.3895   1
   3   0  19 1067.44 48.9680   6
   3   0  20 20.2389 11.3381   6
   3  -1 -23 9.33306 10.0775   6
   3   1 -22 611.277 36.5089   6
   3  -1 -22 594.588 34.3646   6
   3  -1 -22 666.346 36.9631   5
   3   1 -22 613.887 37.5123   5
   3  -1 -21 49.4574 12.9777   5
   3   1 -21 66.4855 14.6593   5
  -3  -1  21 90.8837 15.8694   3
  -3   1  21 63.3987 14.5886   3
   3   1 -21 53.4959 13.8088   6
   3  -1 -21 46.7819 12.4255   6
   3   1 -20 298.295 24.9902   5
   3  -1 -20 278.973 23.4746   5
  -3  -1  20 252.503 23.9978   3
  -3   1  20 246.082 23.6867   3
   3   1 -20 280.436 23.7032   6
   3  -1 -20 225.708 21.1915   6
   3   1 -19 105.852 16.6955   5
   3   1 -19 88.2190 18.4862   2
   3  -1 -19 116.907 15.6394   5
   3   1 -19 115.349 16.5664   6
   3  -1 -19 87.4511 14.6212   6
  -3  -1  19 96.2510 15.5924   3
  -3   1  19 94.7909 16.0210   3
   3   1 -18 81.2253 18.4936   2
   3  -1 -18 118.909 14.9649   5
   3   1 -18 77.6080 13.7335   5
   3   1 -18 67.1319 13.1641   6
   3  -1 -18 95.9965 13.9344   6
  -3  -1  18 93.2933 14.9102   3
  -3   1  18 65.9482 13.4008   3
   3   1 -17 12.8010 11.2982   2
   3   1 -17 2.43154 8.84967   5
   3  -1 -17 15.8193 8.38500   5
   3  -1 -17 8.53737 8.87769   6
  -3  -1  17 4.43868 8.79354   3
  -3   1  17 17.7372 8.38863   3
   3  -1 -16 27.4032 9.14144   5
  -3   1  16 42.7071 11.5361   3
  -3  -1  16 32.9197 10.4403   3
   3   1 -16 24.0694 13.2650   2
  -3   1  15 283.048 22.4578   3
  -3  -1  15 305.220 23.3956   3
   3  -1 -15 271.566 19.8664   5
   3   1 -15 271.094 26.1861   2
   3   1 -14 1494.06 63.9494   2
  -3   1  14 1401.09 56.5027   3
  -3  -1  14 1536.04 58.5665   3
   3   1 -13 1322.40 58.2352   2
   3   1 -12 74.8220 13.2092   2
   3   1 -11 1195.89 52.5473   2
  -3   1  11 1277.66 56.0523   2
  -3   1  10 133.908 16.7287   2
   3   1 -10 138.481 15.7136   2
  -3   1  10 113.662 13.5230   3
  -3  -1  10 115.165 13.8252   3
  -3   1   9 395.308 26.7195   2
   3   1  -9 321.680 23.4190   2
  -3   1   9 358.300 22.5542   3
  -3  -1   9 326.099 21.9264   3
  -3   1   8 4033.39 120.041   2
   3   1  -8 4013.94 118.334   2
  -3   1   8 4004.92 113.753   3
  -3  -1   8 4028.34 114.250   3
  -3   1   7 1091.79 46.2524   2
   3  -1  -7 1004.44 44.4224   2
   3   1  -7 1240.29 47.2886   2
  -3   1   7 1143.99 43.7012   3
  -3  -1   7 1140.17 43.7488   3
   3   1  -6 1240.39 46.8305   2
  -3  -1   6 1164.26 43.3910   3
  -3   1   6 1203.36 43.8584   3
  -3   1   5 1344.18 47.9728   3
  -3  -1   5 1440.40 48.8166   3
  -3  -1   4 474.777 23.4727   3
  -3   1   4 475.924 23.2668   3
  -3   1   3 933.674 34.7636   3
  -3  -1   3 887.714 34.0438   3
  -3  -1   2 82.5464 8.84046   3
  -3   1   2 81.5499 8.87755   3
  -3  -1   1 1201.17 39.3765   3
  -3   1   1 1231.78 39.8048   3
   3  -1  -1 1162.93 32.5877   4
  -3  -1   0 7284.00 179.850   3
  -3   1   0 7310.91 179.928   3
  -3  -1  -1 3108.95 82.1632   3
  -3   1  -1 3094.89 81.9628   3
  -3  -1  -2 585.009 21.6770   3
  -3   1  -2 567.794 21.2116   3
   3   1   2 547.109 27.7216   1
  -3   1  -3 1936.01 51.4501   3
  -3  -1  -3 1898.80 51.8758   3
  -3  -1  -3 1862.70 47.2730   4
  -3   1  -3 1865.98 50.3499   4
   3   1   3 1833.16 61.8196   1
  -3  -1  -4 4553.49 109.607   3
  -3   1  -4 4350.63 108.713   3
  -3   1  -4 4372.77 110.384   4
   3   1   4 4503.93 123.465   1
  -3   1  -5 2531.55 63.8501   3
   3   1   5 2546.77 78.8524   1
  -3   1  -6 180.596 7.24313   3
   3   1   6 166.687 15.2584   1
   3   1   7 2464.89 78.5369   1
   3  -1   8 2504.99 78.3338   6
   3   1   8 2659.24 82.8958   1
  -3   1  -8 2510.88 83.4560   1
   3   1   9 1569.19 54.4840   6
   3  -1   9 1512.13 54.6010   6
   3   1   9 1543.06 58.4160   1
  -3   1  -9 1618.76 60.5841   1
   3  -1  10 91.4066 12.0932   6
   3   1  10 82.1179 11.8257   6
   3   1  10 110.992 14.8946   1
  -3   1 -10 84.7657 13.8120   1
   3   1  11 1150.01 46.0930   6
   3  -1  11 1220.82 48.0283   6
   3   1  11 1319.85 52.9165   1
  -3   1 -11 1256.90 53.7033   1
   3   1  12 960.278 42.0781   5
   3  -1  12 963.401 42.0983   6
   3   1  12 1016.61 42.4626   6
   3   1  12 1044.21 46.9362   1
  -3   1 -12 1049.59 48.5933   1
   3   1  13 1453.19 55.8525   5
   3  -1  13 1444.98 55.6113   6
   3   1  13 1464.99 54.6615   6
   3   1  13 1604.66 62.7589   1
  -3   1 -13 1521.70 62.9655   1
   3   1  14 244.260 20.9328   5
   3  -1  14 261.649 21.3847   6
   3   1  14 268.822 20.7636   6
   3   1  14 256.973 24.1453   1
  -3   1 -14 262.038 24.6955   1
   3  -1  15 1199.22 51.0468   5
   3   1  15 1226.99 51.0987   5
   3  -1  15 1246.83 50.8327   6
   3   1  15 1265.97 49.8041   6
   3   1  15 1217.19 56.3024   1
  -3   1 -15 1213.10 57.5743   1
   3  -1  16 269.260 22.9083   5
   3   1  16 279.343 23.2866   5
   3  -1  16 272.320 22.8313   6
   3   1  16 287.707 22.5738   6
   3   1  16 300.212 27.1351   1
  -3   1 -16 273.531 27.7795   1
   3  -1  17 1048.66 46.7190   6
   3   1  17 984.069 44.3743   6
  -3   1 -17 928.263 52.1479   1
   3  -1  17 988.025 46.2980   5
   3   1  17 984.016 46.4186   5
   3  -1  18 466.383 31.2867   6
   3   1  18 539.257 31.8593   6
  -3   1 -18 464.420 37.7140   1
   3   1  18 524.280 33.4467   5
   3  -1  18 522.559 33.1785   5
   3  -1  19 1003.08 48.1166   6
   3   1  19 1019.31 47.2565   6
   3   1  20 16.5412 10.7258   6
   3  -1  20-9.65937 11.2461   6
   3   1  21 312.573 26.8936   6
   3  -2 -23 942.878 43.6246   6
   3  -2 -22 6.67807 9.90889   5
   3  -2 -22 7.40800 9.82702   6
   3   2 -21 1866.48 70.0004   5
   3  -2 -21 1680.53 64.7505   5
  -3   2  21 1724.51 70.0603   3
  -3  -2  21 1878.45 72.0638   3
   3   2 -21 1748.41 68.3029   6
   3  -2 -21 1761.21 64.0768   6
   3  -2 -20 29.5040 10.6484   5
  -3  -2  20 26.0519 11.2710   3
  -3   2  20 11.4501 10.9484   3
   3  -2 -20 28.7772 10.1692   6
   3   2 -20 40.9235 12.4765   5
   3   2 -20 37.0904 12.4826   6
   3   2 -19 2.74707 9.17749   5
   3   2 -19-2.34296 12.1731   2
   3  -2 -19-1.17372 9.18633   5
   3   2 -19 1.46429 9.31771   6
   3  -2 -19 2.37476 8.02539   6
  -3  -2  19 4.75560 8.84698   3
  -3   2  19-1.57615 10.7734   3
   3   2 -18 5.27767 9.01920   5
   3   2 -18 6.67947 12.2176   2
   3   2 -18 1.42631 9.74978   6
   3  -2 -18 4.69924 8.03084   6
  -3   2  18 1.52328 9.31342   3
  -3  -2  18 24.6131 10.5153   3
   3  -2 -18-1.11245 8.63328   5
   3   2 -17 16.8176 12.6730   2
   3  -2 -17 7.38712 7.68017   5
   3   2 -17-4.17109 8.96089   6
   3  -2 -17 8.06159 8.38121   6
  -3  -2  17 7.46310 9.61980   3
  -3   2  17 5.88123 8.47581   3
   3  -2 -16 130.359 14.2210   5
  -3   2  16 124.817 16.2136   3
  -3  -2  16 133.091 16.3285   3
   3   2 -16 100.932 18.1468   2
  -3  -2  15 4280.76 127.739   3
  -3   2  15 4225.41 127.121   3
   3  -2 -15 4530.94 120.293   5
   3   2 -15 4122.28 135.020   2
  -3   2  14 176.038 17.8213   3
  -3  -2  14 193.058 18.9735   3
   3  -2 -14 183.131 15.1376   5
   3   2 -14 177.788 20.7531   2
   3   2 -13 3764.51 119.381   2
   3   2 -12 230.601 21.4615   2
   3   2 -11 294.775 23.8883   2
  -3   2  11 334.167 26.7041   2
   3   2 -10 908.405 43.0646   2
  -3   2  10 957.623 45.8470   2
  -3   2  10 910.364 40.1627   3
   3   2  -9 417.656 27.2159   2
  -3   2   9 432.022 25.2423   3
  -3   2   9 442.214 28.6711   2
  -3  -2   9 439.420 25.6328   3
  -3   2   8 207.903 16.6739   3
   3   2  -8 230.020 19.1829   2
  -3   2   8 210.969 19.3529   2
  -3  -2   8 209.409 17.0600   3
  -3   2   7 8795.36 219.871   3
   3   2  -7 8413.32 222.830   2
  -3   2   7 8602.18 224.915   2
  -3  -2   7 8624.45 219.719   3
   3   2  -6 3.21360 5.56704   2
  -3   2   6 11.2872 7.36540   2
  -3   2   6 1.84455 4.40971   3
  -3  -2   6 12.0060 6.02695   3
  -3   2   5 1815.34 58.5912   3
  -3   2   5 1769.11 60.6672   2
  -3  -2   5 1746.20 57.7696   3
  -3   2   4 403.582 21.4339   3
  -3   2   4 390.883 22.8388   2
  -3  -2   4 395.270 21.0532   3
  -3   2   3 573.430 26.0515   3
  -3   2   3 596.728 28.7894   2
  -3  -2   3 625.125 26.7336   3
  -3   2   2 2987.68 86.8978   2
  -3  -2   2 2939.06 82.6525   3
   3  -2  -1 1151.17 34.2579   4
   3   2  -1 1182.77 39.1727   3
  -3  -2   1 1190.32 39.4977   3
   3  -2   0 67.9217 5.77626   4
   3   2   0 65.7622 7.43078   3
  -3  -2   0 73.4303 7.98359   3
   3   2   1 4574.52 115.969   3
  -3   2  -1 4521.14 115.996   3
  -3  -2  -1 4514.78 115.986   3
   3   2   2 295.861 19.3278   1
  -3  -2  -2 281.453 14.1143   3
  -3   2  -2 268.438 13.7198   3
   3   2   2 275.181 13.8479   3
  -3   2  -3 58.4036 5.93258   4
   3   2   3 59.3215 9.37446   1
  -3  -2  -3 64.5633 6.28708   3
   3   2   3 49.7571 5.69391   3
  -3   2  -3 41.2926 5.36175   3
  -3   2  -4 60.6122 6.37895   4
   3   2   4 84.0112 11.0341   1
  -3   2  -4 64.1498 5.89048   3
   3   2   4 69.5038 6.19453   3
  -3   2  -5 53.7657 6.53962   4
  -3   2  -5 61.9971 4.97534   3
   3   2   5 54.5210 5.09776   3
   3   2   5 61.4890 9.77351   1
   3   2   6 265.549 19.0946   1
  -3   2  -6 236.033 9.26622   3
   3   2   7 3623.26 105.602   1
   3  -2   7 3540.07 102.228   6
   3  -2   8 493.179 25.0811   5
   3   2   8 460.230 27.3406   1
  -3   2  -8 550.590 30.3190   1
   3  -2   8 453.498 25.2390   6
   3  -2   9 799.236 35.2912   5
   3  -2   9 846.762 36.9730   6
  -3   2  -9 945.229 42.4532   1
   3   2   9 891.711 40.5758   1
   3   2  10 112.443 13.0118   6
   3  -2  10 131.876 13.9771   6
  -3   2 -10 132.884 16.1948   1
   3   2  10 117.617 14.8342   1
   3   2  11 975.672 40.4539   6
   3  -2  11 936.213 41.4078   6
  -3   2 -11 1024.78 47.0679   1
   3  -2  12 316.449 22.5961   6
   3   2  12 308.924 21.2424   6
   3   2  12 353.729 25.9212   1
  -3   2 -12 321.243 25.3413   1
   3   2  13 19.8744 8.31788   5
  -3   2 -13 28.3639 11.0314   1
   3   2  13 37.4025 10.9004   1
   3  -2  13 21.1413 8.97711   6
   3   2  13 21.0196 7.74766   6
   3   2  14 41.6209 10.4629   5
   3   2  14 33.2374 11.2580   1
   3  -2  14 25.9757 9.84380   6
   3   2  14 39.0318 9.60480   6
  -3   2 -14 24.5255 11.3149   1
   3   2  15 1239.09 51.6005   5
   3   2  15 1195.42 48.6289   6
   3  -2  15 1272.92 52.1660   6
   3   2  15 1254.30 57.2526   1
  -3   2 -15 1326.54 59.3805   1
   3   2  16 89.0762 15.0799   5
  -3   2 -16 81.0692 15.9585   1
   3   2  16 66.8273 16.0392   1
   3  -2  16 66.4499 13.7093   6
   3   2  16 88.9815 13.7970   6
  -3   2 -17 2.01858 11.0785   1
   3   2  17 14.6675 10.3568   5
   3  -2  17 11.7958 10.5191   6
   3   2  17 12.8286 9.05893   6
   3  -2  17 4.41331 10.4950   5
   3   2  18 207.871 22.0344   5
   3  -2  18 220.763 22.2211   5
   3  -2  18 270.889 24.3083   6
   3   2  18 296.417 23.3515   6
  -3   2 -18 266.566 28.4634   1
   3  -2  19 404.841 30.4186   6
   3   2  19 378.691 27.5703   6
   3   2  20 360.444 27.2899   6
   3   2  21 58.7015 14.6920   6
   3  -3 -23 10.5845 8.89033   6
   3  -3 -22-1.15077 9.30696   6
   3   3 -21-4.69306 10.4537   6
   3  -3 -21-9.05555 11.1240   6
   3  -3 -20 54.2613 12.2866   5
  -3   3  20 63.4862 14.8226   3
  -3  -3  20 66.6315 14.4230   3
   3   3 -20 83.1174 15.5229   6
   3  -3 -20 72.4823 12.7456   6
   3   3 -20 68.2195 14.9620   5
   3  -3 -19 22.0593 9.01627   6
   3   3 -19 39.6790 13.0930   5
   3   3 -19 27.4729 13.6191   2
   3  -3 -19 23.9134 13.5834   2
   3  -3 -19 29.0405 9.51524   5
   3   3 -19 31.9060 11.8094   6
  -3  -3  19 39.4697 11.7310   3
  -3   3  19 28.3184 11.7993   3
   3  -3 -18 2144.18 89.5802   2
   3   3 -18 2184.02 88.5070   2
   3   3 -18 2244.34 76.7763   5
   3  -3 -18 2260.75 71.9343   5
  -3   3  18 2029.88 77.3906   3
  -3  -3  18 2256.62 79.8550   3
   3  -3 -18 2242.90 72.4213   6
   3   3 -18 2174.26 77.8644   6
   3   3 -17 254.268 26.4499   2
   3  -3 -17 349.155 31.4752   2
   3  -3 -17 250.032 19.0839   5
  -3   3  17 254.642 22.8009   3
  -3  -3  17 290.290 24.0381   3
   3   3 -17 252.984 22.8761   6
   3  -3 -17 287.605 20.6498   6
  -3   3  16 583.355 34.8034   3
  -3  -3  16 715.201 38.0065   3
   3  -3 -16 704.430 31.3257   5
   3   3 -16 691.361 42.3723   2
   3  -3 -16 749.369 44.9521   2
  -3   3  15 562.764 32.8010   3
  -3  -3  15 589.714 33.4078   3
   3  -3 -15 545.856 26.7948   5
   3  -3 -15 562.006 37.7865   2
   3   3 -15 604.484 38.0495   2
   3  -3 -14 8.05999 6.36256   5
  -3   3  14 6.65628 7.67425   3
  -3  -3  14-1.37265 7.40189   3
   3  -3 -14 9.11811 9.65600   2
   3   3 -14 5.16441 8.03903   2
  -3  -3  13 5.29134 7.97772   3
   3   3 -13 17.8664 9.79385   2
   3   3 -12 2627.49 89.5539   2
   3   3 -11 1.44788 7.80664   2
   3   3 -10 3713.51 113.320   2
  -3   3  10 3946.46 118.001   2
  -3  -3  10 3894.62 117.172   2
  -3   3   9 477.394 29.8664   2
  -3  -3   9 423.455 28.1920   2
  -3   3   9 410.861 25.1224   3
   3   3  -9 478.035 28.6931   2
   3   3  -9 440.707 25.0788   3
  -3  -3   9 493.295 27.2447   3
   3   3  -8 100.548 13.0343   2
  -3   3   8 126.045 15.4383   2
  -3  -3   8 118.956 14.7752   2
   3   3  -8 104.289 11.6925   3
  -3  -3   8 129.946 13.3728   3
  -3   3   7 1263.85 50.4011   2
   3   3  -7 1226.69 48.7084   2
  -3  -3   7 1275.80 47.6804   3
  -3  -3   6 42.7869 8.24825   3
  -3   3   6 27.0518 8.38824   2
   3   3  -6 21.2272 7.04085   2
  -3   3   5 146.894 14.4960   2
  -3  -3   5 152.788 13.6029   3
  -3   3   4 10089.6 257.952   2
  -3  -3   4 10471.2 255.054   3
  -3  -3   3 111.718 11.0064   3
  -3   3   3 128.798 12.8729   2
  -3  -3   2 2060.56 60.6151   3
  -3   3   2 2074.17 64.1654   2
   3   3  -2 1945.84 47.8326   4
   3   3  -1 1105.52 38.0157   3
  -3  -3   1 1167.83 38.9177   3
  -3   3   1 1125.72 41.6043   2
   3  -3  -1 1059.28 34.3693   4
   3  -3   0 594.278 22.2502   4
   3   3   0 632.542 25.3271   3
  -3  -3   0 638.569 25.3864   3
  -3  -3  -1 275.035 14.6422   3
   3   3   1 232.357 13.5905   3
   3   3   2 484.085 25.1894   1
  -3  -3  -2 486.976 20.4638   3
   3   3   2 471.146 20.0715   3
  -3   3  -3 1272.19 39.5180   4
   3   3   3 1277.87 47.1324   1
   3   3   3 1296.24 39.3790   3
  -3   3  -4 4663.50 118.470   4
   3   3   4 4725.99 128.000   1
   3   3   4 4575.67 115.964   3
  -3   3  -5 1458.43 45.3923   4
   3   3   5 1453.38 41.4605   3
   3   3   5 1434.03 52.0949   1
  -3   3  -6 63.6833 8.07953   4
   3   3   6 59.6250 5.42718   3
   3   3   6 78.9718 11.1429   1
   3  -3   6 67.6820 9.73690   6
   3   3   7 928.746 37.9136   1
  -3   3  -7 661.590 21.0487   3
   3   3   7 790.369 23.0368   3
   3  -3   7 815.093 34.4226   6
   3  -3   7 787.328 32.1105   5
   3  -3   8 568.690 28.3383   6
   3  -3   8 546.555 26.3569   5
   3   3   8 616.699 30.8976   1
   3  -3   9 68.0804 10.7419   5
   3  -3   9 54.6662 9.95348   6
   3   3   9 75.4220 12.0490   1
  -3   3  -9 85.9637 13.7754   1
   3  -3  10 557.309 28.3855   5
   3   3  10 566.859 31.6455   1
  -3   3 -10 572.138 33.0511   1
   3   3  10 566.873 28.0669   6
   3  -3  10 551.064 29.3589   6
   3  -3  11 557.184 28.8330   5
   3   3  11 530.935 31.6105   1
  -3   3 -11 555.397 33.2354   1
  -3  -3 -11 503.711 32.1911   1
   3  -3  11 546.862 29.7400   6
   3   3  11 561.141 28.2350   6
   3  -3  12 1368.80 53.6043   5
   3  -3  12 1458.20 58.8686   1
   3   3  12 1557.10 60.2691   1
  -3   3 -12 1536.53 61.4924   1
  -3  -3 -12 1429.57 60.5638   1
   3   3  12 1496.75 53.3022   6
   3  -3  12 1524.24 56.5744   6
   3   3  13 1534.90 57.8868   5
   3  -3  13 1572.62 58.5642   6
   3   3  13 1484.38 54.8171   6
   3  -3  13 1578.47 62.6469   1
   3   3  13 1556.06 62.6706   1
  -3   3 -13 1559.43 63.9866   1
  -3  -3 -13 1544.59 64.3049   1
   3   3  14 20.9134 8.42619   5
   3  -3  14 3.30031 10.5027   1
   3   3  14 3.32900 9.59668   1
   3  -3  14 12.0646 9.26657   6
   3   3  14 9.97566 7.23501   6
  -3   3 -14 8.70687 11.7718   1
  -3  -3 -14 3.54161 9.88523   1
   3   3  15 324.911 24.6238   5
   3   3  15 324.287 22.8538   6
   3  -3  15 291.288 24.1121   6
   3  -3  15 342.233 28.0582   1
   3   3  15 364.645 29.2414   1
  -3   3 -15 356.460 29.4600   1
  -3  -3 -15 308.034 27.4213   1
   3   3  16-2.83797 9.14445   5
  -3   3 -16-5.75035 11.7185   1
  -3  -3 -16 5.79148 10.5929   1
   3   3  16-3.71634 11.6715   1
   3  -3  16-5.52920 11.1103   1
   3  -3  16 11.6978 9.88300   6
   3   3  16 4.75903 8.57222   6
  -3   3 -17 53.8470 15.5538   1
  -3  -3 -17 56.2573 15.6685   1
   3   3  17 76.6998 14.5767   5
   3  -3  17 68.7259 14.4310   6
   3   3  17 77.9501 13.1937   6
  -3   3 -18 603.920 41.7808   1
  -3  -3 -18 597.030 41.6943   1
   3   3  18 643.074 36.6953   5
   3  -3  18 589.015 36.3456   6
   3   3  18 642.797 34.0996   6
   3  -3  19 74.6793 16.0986   6
   3   3  19 114.073 16.0350   6
   3   3  20-1.39212 10.2289   6
   3   3  21 380.124 28.0179   6
   3   3  22 213.497 22.4206   6
   3  -4 -22 18.2005 9.76615   6
   3  -4 -21 32.4369 10.5268   6
   3   4 -20 33.4039 12.6730   6
   3  -4 -20 26.7783 9.52202   6
   3   4 -20 30.1362 12.9510   5
  -3   4  20 22.7690 11.7332   3
  -3  -4  20 19.4920 11.6012   3
   3   4 -19 1277.67 53.8717   5
   3  -4 -19 1164.37 62.6266   2
   3   4 -19 1098.54 60.1732   2
  -3  -4  19 1189.68 54.1491   3
  -3   4  19 1214.71 54.4701   3
   3   4 -19 1231.91 54.4873   6
   3  -4 -19 1295.42 47.5982   6
   3  -4 -18 97.1666 18.7682   2
   3   4 -18 74.5787 17.3012   2
   3  -4 -18 72.1642 11.3768   5
   3  -4 -18 63.4575 11.2068   6
   3   4 -18 48.8193 12.8161   6
  -3   4  18 52.1681 13.3543   3
  -3  -4  18 81.6705 14.5569   3
   3  -4 -17 932.251 52.5689   2
   3   4 -17 973.764 51.9627   2
   3   4 -17 975.252 46.1401   6
   3  -4 -17 942.598 39.4883   6
  -3   4  17 953.210 46.0206   3
  -3  -4  17 1005.10 46.7895   3
   3  -4 -17 950.666 37.7181   5
   3  -4 -16 97.5967 18.4469   2
   3   4 -16 70.8702 16.6113   2
   3  -4 -16 111.148 12.2968   5
  -3   4  16 100.736 15.0651   3
  -3  -4  16 122.591 16.3903   3
   3  -4 -15 159.113 20.7333   2
   3   4 -15 142.529 19.1935   2
   3  -4 -15 142.283 12.7943   5
  -3   4  15 121.359 16.2079   3
  -3  -4  15 137.714 16.2291   3
   3   4 -14 192.635 20.5874   2
   3  -4 -14 231.827 22.4980   2
  -3   4  14 182.708 18.5456   3
  -3  -4  14 232.404 20.5213   3
  -3  -4  13 65.2951 12.2835   3
   3  -4 -13 46.0495 11.5947   2
   3   4 -13 52.9740 12.3036   2
   3  -4 -12 70.5534 13.6765   2
   3   4 -12 94.1349 14.4364   2
   3   4 -11 3564.50 106.399   3
   3  -4 -11 3685.64 112.968   2
   3   4 -11 3553.70 110.911   2
   3  -4 -10 4.19045 7.25767   2
   3   4 -10-1.34816 6.73013   2
  -3   4  10 1.53371 8.26968   2
  -3  -4  10 7.61592 7.76053   2
   3   4 -10 4.50144 5.84739   3
  -3  -4   9 1193.11 50.1339   2
  -3   4   9 1130.23 49.4656   2
   3   4  -9 1097.41 44.1806   3
   3  -4  -9 1168.36 48.7663   2
   3   4  -9 1124.62 47.7476   2
  -3  -4   9 1032.23 44.8979   3
  -3   4   8 520.673 30.9326   2
  -3  -4   8 593.233 32.2202   2
   3  -4  -8 512.777 29.3940   2
   3   4  -8 562.424 30.1901   2
   3   4  -8 513.132 27.1040   3
  -3  -4   8 498.706 27.8298   3
  -3   4   7 785.673 37.8887   2
  -3  -4   7 813.276 37.8702   2
   3  -4  -7 836.324 37.2904   2
   3   4  -7 747.128 35.8367   2
  -3  -4   7 837.850 36.3566   3
  -3  -4   6 2017.61 66.3137   3
  -3   4   6 2121.99 69.7444   2
  -3  -4   6 2064.75 68.9560   2
  -3  -4   5 675.826 30.6419   3
  -3   4   5 698.084 32.7985   2
  -3  -4   5 672.971 32.0007   2
  -3  -4   4 3523.51 98.5587   3
  -3   4   4 3443.21 100.531   2
   3   4  -3 3691.41 92.1450   4
  -3   4   3 3833.64 106.536   2
  -3  -4   3 3838.59 103.900   3
  -3   4   2 37.6394 7.61198   2
   3  -4  -2 26.5446 5.52665   4
  -3  -4   2 22.7431 6.40178   3
   3  -4  -1 0.55135 3.12800   4
  -3   4   1 1.71861 4.87507   2
  -3  -4   1 0.71091 4.28550   3
   3  -4   0 714.310 25.8212   4
  -3  -4   0 697.790 27.3522   3
   3  -4   1 902.270 31.5135   4
  -3  -4  -1 956.236 33.1165   3
   3   4   1 885.107 32.6247   3
   3  -4   2 4586.23 118.702   1
   3   4   2 4543.09 118.548   1
   3   4   2 4643.54 111.399   3
  -3   4  -3 1801.41 53.6411   4
   3  -4   3 1857.76 60.7887   1
   3   4   3 1743.30 59.5213   1
   3   4   3 1829.23 53.0756   3
  -3   4  -4 2460.05 68.9559   4
   3   4   4 2378.17 66.4128   3
   3  -4   4 2417.31 75.6313   1
   3   4   4 2462.66 75.8228   1
  -3   4  -5 1364.29 44.8863   4
   3   4   5 1383.21 41.5782   3
   3  -4   5 1416.29 50.7829   1
   3   4   5 1367.63 50.2079   1
   3  -4   5 1420.87 46.3746   5
   3  -4   6 535.986 27.4433   1
   3   4   6 493.925 27.3670   1
   3  -4   6 518.480 24.3406   5
   3   4   6 504.743 19.3912   3
   3  -4   6 476.757 25.6322   6
   3  -4   7 658.990 32.3580   1
   3   4   7 664.008 32.4064   1
   3   4   7 650.729 22.5819   3
   3  -4   7 659.520 31.0874   6
   3  -4   7 690.554 29.6921   5
   3  -4   8 1417.35 50.7742   6
   3  -4   8 1341.41 47.5676   5
   3   4   8 1293.63 37.8172   3
   3   4   8 1384.90 52.3067   1
   3  -4   8 1389.63 52.4141   1
   3  -4   9 9.66187 6.67724   5
   3  -4   9-16.1285 7.47896   1
  -3   4  -9 6.68826 7.94762   1
   3   4   9-1.25218 6.87104   1
  -3  -4  -9-1.37582 7.54947   1
  -3   4  -9 2.03698 1.68952   3
   3   4   9 4.81690 2.87794   3
   3  -4   9 2.21556 6.18262   6
  -3   4 -10 3425.77 98.7103   1
  -3  -4 -10 3315.49 98.3078   1
   3  -4  10 3162.95 91.9049   6
   3  -4  10 3398.78 96.4525   1
   3   4  10 3240.88 95.4889   1
   3  -4  10 3248.41 89.8989   5
  -3   4 -11 1438.40 54.0911   1
  -3  -4 -11 1533.72 55.9480   1
   3  -4  11 1456.22 49.9266   6
   3   4  11 1393.90 45.3086   6
   3  -4  11 1531.36 48.6501   5
   3  -4  11 1499.39 52.9146   1
   3   4  11 1511.17 53.4407   1
   3  -4  12 383.310 24.3046   5
  -3   4 -12 356.780 27.7905   1
  -3  -4 -12 346.878 27.4460   1
   3  -4  12 400.391 27.5150   1
   3   4  12 425.564 28.3888   1
   3  -4  12 366.133 24.8525   6
   3   4  12 351.788 22.1200   6
  -3   4 -13 55.7799 11.9697   1
  -3  -4 -13 56.9758 11.9841   1
   3  -4  13 38.8748 10.7553   5
   3  -4  13 30.3404 9.63835   6
   3   4  13 33.3322 8.66629   6
   3  -4  13 31.1314 11.3600   1
   3   4  13 29.7988 11.1058   1
   3  -4  14 1267.60 51.1825   5
   3   4  14 1266.31 51.7657   5
  -3   4 -14 1282.01 57.6389   1
  -3  -4 -14 1128.01 55.2881   1
   3  -4  14 1279.78 56.3008   1
   3   4  14 1312.31 56.8329   1
   3   4  14 1294.61 48.5382   6
   3  -4  14 1358.73 53.9398   6
   3   4  15 785.292 39.4672   5
   3  -4  15 810.119 39.7418   5
  -3  -4 -15 788.451 44.5676   1
  -3   4 -15 832.792 45.6301   1
   3  -4  15 852.860 45.3693   1
   3   4  15 951.970 47.3284   1
   3   4  15 795.592 36.5420   6
   3  -4  15 830.495 41.3713   6
   3   4  16 1194.81 52.5882   5
   3  -4  16 1309.33 54.9975   6
   3   4  16 1229.92 49.0480   6
  -3   4 -16 1228.24 58.8304   1
  -3  -4 -16 1289.25 60.4356   1
   3  -4  16 1388.29 61.0162   1
   3   4  16 1448.23 61.8505   1
  -3   4 -17 141.750 20.9953   1
  -3  -4 -17 165.171 22.6235   1
   3   4  17 143.963 18.1135   5
   3  -4  17 128.050 18.3614   6
   3   4  17 131.184 15.7464   6
   3   4  18 259.675 23.8054   5
   3  -4  18 225.698 23.4091   6
   3   4  18 254.902 21.4093   6
  -3  -4 -18 252.564 27.4438   1
  -3   4 -18 249.004 27.9385   1
   3   4  19 436.458 28.4421   6
   3   4  20 89.4153 15.0977   6
   3   4  21 30.5182 11.8465   6
   3  -5 -21 14.4314 8.55257   6
  -3  -5  20 684.796 39.7607   3
  -3   5  20 696.479 39.9892   3
   3  -5 -20 654.086 31.2716   6
   3  -5 -19 242.942 28.4799   2
   3   5 -19 185.667 24.5599   2
   3   5 -19 173.742 20.9781   6
   3  -5 -19 187.590 16.7810   6
  -3  -5  19 221.768 22.6003   3
  -3   5  19 254.169 23.8775   3
   3   5 -19 263.088 23.3792   5
   3  -5 -18 15.6281 12.6698   2
   3   5 -18 14.5879 10.6218   2
   3   5 -18 4.72584 9.76851   6
  -3   5  18 14.0015 9.90441   3
  -3  -5  18 16.9741 10.4343   3
   3  -5 -18 15.5324 7.39593   6
   3   5 -17 204.045 23.8982   2
   3  -5 -17 280.244 28.3086   2
  -3  -5  17 259.137 23.0475   3
  -3   5  17 209.425 21.4046   3
   3   5 -17 284.672 24.5860   6
   3  -5 -17 218.188 17.2321   6
   3  -5 -16 1124.38 40.4609   5
   3  -5 -16 1200.88 43.8652   6
   3   5 -16 1155.14 55.9911   2
   3  -5 -16 1179.52 58.2036   2
  -3  -5  16 1103.37 50.3539   3
  -3   5  16 1158.40 51.5417   3
   3  -5 -15 309.117 28.2110   2
   3   5 -15 295.515 26.2675   2
   3  -5 -15 324.626 17.8250   5
  -3   5  15 328.448 25.0173   3
  -3  -5  15 354.636 25.4833   3
   3   5 -14 2685.01 93.5853   2
   3  -5 -14 2759.15 95.8776   2
  -3  -5  14 2630.12 88.5254   3
  -3   5  14 2672.55 89.1579   3
   3  -5 -13 260.290 24.0248   2
   3   5 -13 278.399 24.2047   2
  -3  -5  13 289.039 22.6808   3
   3   5 -13 329.244 22.8229   3
   3   5 -12 552.137 30.1455   3
   3  -5 -12 516.101 32.9465   2
   3   5 -12 538.127 32.8119   2
   3  -5 -12 525.879 21.6084   5
   3   5 -11 820.698 38.0691   3
   3   5 -11 830.398 40.9894   2
   3  -5 -11 876.082 42.4614   2
   3  -5 -11 834.368 28.6379   5
   3  -5 -10 7.00828 7.55758   2
   3   5 -10-1.33886 7.21898   2
   3  -5 -10 3.37966 4.03848   5
  -3   5  10 3.03828 8.19101   2
  -3  -5  10 6.05748 8.16528   2
   3   5 -10 1.14385 6.16761   3
   3   5  -9 193.108 16.7361   3
  -3  -5   9 196.680 18.1085   3
  -3   5   9 211.978 19.8121   2
  -3  -5   9 200.258 19.1366   2
   3   5  -9 203.006 18.2126   2
   3  -5  -9 210.036 18.8800   2
   3   5  -8 1872.07 63.1025   3
  -3  -5   8 1884.08 64.9780   3
  -3   5   8 1878.17 68.0055   2
  -3  -5   8 1943.01 68.1542   2
   3  -5  -8 1907.50 66.2310   2
   3   5  -8 1819.71 64.9008   2
   3  -5  -7 80.9046 11.1492   2
   3   5  -7 72.6478 10.9699   2
  -3   5   7 72.6670 12.4871   2
  -3  -5   7 84.4977 12.0996   2
  -3  -5   7 77.3680 11.1553   3
  -3  -5   6 4480.59 125.297   3
  -3   5   6 4557.38 128.014   2
  -3  -5   6 4537.33 127.403   2
  -3  -5   5 527.826 27.2310   3
  -3   5   5 548.182 28.4477   2
  -3  -5   5 544.215 28.0662   2
   3   5  -4 15.4637 4.12042   4
  -3   5   4 13.6523 6.29320   2
  -3  -5   4 13.4909 6.80465   3
   3   5  -3 134.182 8.12080   4
  -3   5   3 154.165 13.7331   2
  -3  -5   3 144.581 12.8401   3
   3   5  -3 152.084 12.8464   3
   3  -5  -2 76.7358 8.62899   4
  -3  -5   2 80.2166 9.70092   3
  -3   5   2 89.0451 10.7183   2
   3  -5  -1 12.9551 4.76203   4
  -3   5   1 6.01261 4.63377   2
  -3  -5   1 2.28620 4.32615   3
   3  -5   0 7215.75 180.195   4
   3  -5   1 145.813 11.1588   4
  -3  -5  -2 1111.25 31.3310   4
   3   5   2 1191.65 39.0458   3
   3   5   2 1171.65 43.8185   1
   3  -5   2 1153.49 43.1768   1
  -3   5  -3 128.215 10.6271   4
   3  -5   3 146.492 13.4665   1
   3   5   3 135.442 13.0972   1
   3   5   3 132.596 10.5148   3
   3  -5   3 123.159 10.1471   5
   3  -5   4 463.777 24.9329   1
   3   5   4 451.545 24.6541   1
   3  -5   4 494.028 21.7185   5
   3   5   4 473.210 20.3730   3
   3  -5   5 131.343 13.1348   1
   3   5   5 123.697 12.8087   1
   3  -5   5 108.248 10.6426   5
   3   5   5 133.070 9.74446   3
   3   5   6 722.526 33.6352   1
   3  -5   6 714.219 33.3259   1
   3   5   6 747.561 26.5447   3
   3  -5   6 721.171 30.1282   5
   3  -5   7 9.27063 5.69852   5
   3  -5   7 17.8482 7.27982   1
   3   5   7 5.62178 6.97055   1
   3   5   7 3.45020 3.76166   3
   3  -5   8 4098.62 116.442   6
   3  -5   8 4222.59 113.285   5
  -3   5  -8 4014.98 112.584   4
   3   5   8 3925.66 102.913   3
   3  -5   8 4188.68 118.563   1
   3   5   8 4189.89 118.552   1
   3  -5   9 685.608 32.9729   6
   3  -5   9 663.635 30.5590   5
  -3   5  -9 640.253 34.2048   1
  -3  -5  -9 620.801 34.2302   1
  -3   5  -9 616.658 29.7152   4
   3   5   9 617.651 22.1927   3
   3  -5   9 612.554 32.8928   1
   3   5   9 626.001 32.9559   1
   3   5  10 13.0648 7.99515   1
  -3   5 -10 29.2591 9.84216   1
  -3  -5 -10 14.4073 8.18121   1
  -3   5 -10 12.7826 2.92336   3
   3   5  10 15.8481 4.29294   3
   3  -5  10 24.5727 8.94469   1
   3  -5  10 10.7399 7.60167   6
   3  -5  10 26.1844 8.20501   5
   3  -5  11 187.352 16.3998   5
   3  -5  11 144.622 15.9968   6
   3   5  11 164.903 14.7920   6
  -3   5 -11 173.782 18.6478   1
  -3  -5 -11 171.094 18.7136   1
   3   5  11 132.920 8.27418   3
   3  -5  11 165.679 17.5525   1
   3   5  11 160.385 17.4917   1
  -3   5 -12-4.65351 8.94113   1
  -3  -5 -12 3.18532 8.58739   1
   3   5  12 2.56741 2.80373   3
   3  -5  12 13.0573 9.58057   1
   3   5  12-5.85932 8.95563   1
   3  -5  12 1.30265 7.73978   6
   3   5  12-0.97542 5.96365   6
   3  -5  12 12.8348 6.51212   5
  -3   5 -13 677.602 37.1113   1
  -3  -5 -13 642.136 36.4866   1
   3   5  13 606.780 28.3843   6
   3  -5  13 680.074 34.2848   6
   3  -5  13 649.936 35.4860   1
   3   5  13 713.937 37.0809   1
   3  -5  13 717.902 33.1314   5
   3   5  14 2167.87 71.2227   6
   3  -5  14 2254.23 77.9786   6
   3  -5  14 2258.53 75.9409   5
   3  -5  14 2206.99 80.8288   1
   3   5  14 2276.35 81.9212   1
  -3   5 -14 2214.86 82.3327   1
  -3  -5 -14 2241.55 82.8598   1
   3   5  15 12.5205 10.1235   5
   3  -5  15 5.22710 10.7995   1
   3   5  15-8.78496 11.1806   1
  -3  -5 -15 7.27018 11.2654   1
  -3   5 -15-5.38062 11.8439   1
   3  -5  15 2.98077 9.11207   6
   3   5  15 9.64221 7.64199   6
   3  -5  16 533.869 33.9986   6
   3   5  16 549.768 29.4133   6
   3  -5  16 543.561 36.7830   1
   3   5  16 566.197 37.6959   1
   3   5  16 569.724 33.4701   5
  -3  -5 -16 558.717 38.1462   1
  -3   5 -16 533.960 37.5185   1
   3   5  17 565.461 34.1903   5
  -3   5 -17 540.589 38.2551   1
  -3  -5 -17 499.073 37.1221   1
   3  -5  17 553.260 34.8396   6
   3   5  17 517.897 29.3725   6
  -3  -5 -18 116.875 19.8598   1
  -3   5 -18 120.824 20.7641   1
   3  -5  18 88.4981 16.7205   6
   3   5  18 112.517 14.6849   6
   3   5  18 98.9716 16.7045   5
   3   5  19 24.6366 10.4414   6
   3   5  20 10.2322 9.40079   6
   3   5  21 62.2322 14.1576   6
   3  -6 -21 98.5551 12.5192   6
   3  -6 -20 23.8361 8.42757   6
   3  -6 -19 113.066 20.8060   2
   3   6 -19 121.706 21.3752   2
   3   6 -19 123.980 19.0229   6
   3  -6 -19 124.666 12.9290   6
  -3  -6  19 127.836 18.1842   3
  -3   6  19 92.4836 16.4202   3
   3  -6 -18 24.3048 13.3510   2
   3   6 -18 48.8379 14.5433   2
   3  -6 -18 40.0988 9.14248   6
   3   6 -18 45.5587 13.6017   6
  -3   6  18 41.1839 12.3262   3
  -3  -6  18 42.0475 12.5283   3
   3   6 -17 603.692 36.0350   6
   3  -6 -17 598.053 27.3903   6
  -3  -6  17 552.856 34.3906   3
  -3   6  17 536.804 34.4566   3
   3  -6 -17 608.681 40.9927   2
   3   6 -17 552.843 37.3267   2
   3  -6 -16 224.943 16.0789   6
   3  -6 -16 224.439 25.2300   2
   3   6 -16 195.714 23.2470   2
  -3   6  16 199.233 20.8258   3
  -3  -6  16 208.957 21.2684   3
  -3  -6  15 78.0859 13.6520   3
  -3   6  15 97.5960 15.1962   3
   3   6 -15 89.6286 16.0418   2
   3  -6 -15 87.1458 16.9473   2
  -3  -6  14 15.5014 8.62318   3
   3   6 -14 8.12255 8.39849   3
   3   6 -14 18.2853 10.3094   2
   3  -6 -14 30.4004 12.3637   2
  -3  -6  13 5.48158 7.89973   3
   3   6 -13 10.4675 8.21928   3
   3  -6 -13 1.68043 8.56202   2
   3   6 -13 1.57256 8.01252   2
   3  -6 -12-0.42653 4.53754   5
   3  -6 -12-1.56878 8.45849   2
   3   6 -12 1.47738 7.67591   2
   3   6 -12-3.78898 7.27994   3
   3  -6 -11 1351.29 39.6010   5
   3   6 -11 1395.97 53.3605   3
   3   6 -11 1467.23 57.1371   2
   3  -6 -11 1399.00 57.1885   2
  -3   6  10 1159.90 52.8986   2
  -3  -6  10 1319.48 55.1088   2
   3  -6 -10 1273.79 36.2468   5
   3   6 -10 1289.63 49.9442   3
   3  -6 -10 1299.53 53.4600   2
   3   6 -10 1303.80 52.7087   2
   3  -6  -9 50.9430 10.5245   2
   3   6  -9 63.8947 10.9028   2
   3  -6  -9 43.6250 4.75118   5
  -3  -6   9 50.1500 10.4577   3
   3   6  -9 45.0092 9.17176   3
  -3   6   9 63.1033 12.2615   2
  -3  -6   9 70.5118 12.5790   2
   3  -6  -8 1535.22 40.7715   5
  -3   6   8 1640.75 60.6277   2
  -3  -6   8 1677.45 60.5504   2
   3   6  -8 1529.16 56.7970   2
   3  -6  -8 1534.96 57.2377   2
  -3  -6   8 1592.89 57.9480   3
   3   6  -8 1540.40 55.7011   3
  -3   6   7 892.418 40.6250   2
  -3  -6   7 953.045 41.3791   2
   3  -6  -7 915.856 39.3325   2
   3   6  -7 874.549 38.6190   2
  -3  -6   7 888.226 39.6485   3
  -3  -6   6 51.9194 10.2212   2
  -3   6   6 47.4725 9.90639   2
  -3  -6   6 50.4963 9.65560   3
  -3  -6   5 338.384 21.6644   3
  -3   6   5 346.847 22.0549   2
  -3  -6   5 309.156 20.8761   2
   3   6  -5 376.921 17.4122   4
  -3  -6   4 865.614 36.1966   3
  -3   6   4 808.144 35.6302   2
   3   6  -4 857.875 28.9241   4
   3   6  -3 2022.87 62.3696   3
  -3  -6   3 1965.30 62.8341   3
  -3   6   3 1938.12 63.2401   2
   3   6  -3 1888.30 53.2235   4
   3   6  -2 5092.75 131.675   3
  -3   6   2 5114.41 134.105   2
   3  -6  -1 1007.17 37.1705   4
   3  -6  -1 1004.57 30.6957   5
  -3   6   1 1067.95 39.8316   2
   3  -6   0 2134.88 58.8027   5
   3  -6   0 2252.57 66.0802   4
   3  -6   1 879.241 29.4781   5
   3  -6   1 863.980 33.8049   4
   3   6   2 6.51325 5.92484   1
   3  -6   2 15.8907 5.79766   1
   3  -6   2 16.4696 4.99570   5
  -3  -6  -2 6.49713 2.83910   4
  -3  -6  -3 467.861 17.7159   4
   3  -6   3 470.690 20.8514   5
   3  -6   3 450.646 23.8434   6
   3  -6   3 502.006 25.7065   1
   3   6   3 475.661 25.1719   1
   3  -6   4 574.470 24.5172   5
   3   6   4 590.908 24.6490   3
   3  -6   4 577.697 28.0309   6
   3  -6   4 584.929 28.6485   1
   3   6   4 628.634 29.2899   1
   3   6   5 436.043 24.1603   1
   3  -6   5 427.105 24.2169   1
   3   6   5 420.138 19.9938   3
   3  -6   5 480.450 22.2659   5
  -3   6  -6 3103.41 88.3665   4
   3  -6   6 3144.42 92.3386   1
   3   6   6 3094.81 92.0156   1
   3   6   6 2875.03 82.3842   3
   3  -6   6 3178.39 87.2797   5
   3  -6   7 682.078 29.7487   5
   3   6   7 685.436 25.8213   3
   3   6   7 687.069 33.0730   1
   3  -6   7 654.909 32.4542   1
  -3   6  -7 665.099 30.2786   4
   3  -6   8 1299.38 46.0474   5
   3   6   8 1209.73 39.1982   3
   3  -6   8 1249.19 49.2705   1
   3   6   8 1224.60 49.1141   1
  -3   6  -8 1281.22 46.6241   4
   3  -6   9 323.701 20.5182   5
  -3   6  -9 364.112 22.0908   4
   3   6   9 328.666 15.8047   3
   3  -6   9 359.542 23.9445   1
   3   6   9 343.854 23.5824   1
   3  -6  10 1101.60 45.4881   6
   3  -6  10 1189.19 43.9655   5
  -3   6 -10 1138.38 48.1141   1
  -3  -6 -10 1089.77 47.8020   1
  -3   6 -10 1102.13 43.5790   4
   3   6  10 996.973 33.1898   3
  -3   6 -10 950.845 30.4671   3
   3  -6  10 1115.84 46.5114   1
   3   6  10 1084.78 46.1726   1
   3   6  11 840.237 34.1110   6
   3  -6  11 843.089 38.6501   6
   3  -6  11 824.430 36.1926   5
  -3  -6 -11 870.344 41.9010   1
  -3   6 -11 917.085 42.1522   1
  -3   6 -11 807.211 36.5770   4
   3   6  11 716.884 25.5152   3
  -3   6 -11 629.732 22.3438   3
   3  -6  11 822.598 39.0988   1
   3   6  11 770.703 38.2138   1
   3  -6  12 934.031 38.0957   5
   3   6  12 908.954 34.7289   6
   3  -6  12 887.146 39.6718   6
  -3   6 -12 841.114 41.3934   1
  -3  -6 -12 909.475 43.2494   1
   3   6  12 751.482 24.5465   3
   3  -6  12 946.837 42.3140   1
   3   6  12 922.285 41.8056   1
  -3   6 -13 9.69987 10.1568   1
  -3  -6 -13 14.8832 10.2519   1
   3   6  13 6.98499 4.24589   3
   3  -6  13 9.31103 8.80664   1
   3   6  13 20.2903 10.7885   1
   3  -6  13 12.6770 9.73672   6
   3   6  13 7.77383 7.54381   6
  -3   6 -14 1445.85 59.5268   1
  -3  -6 -14 1395.83 58.6452   1
   3   6  14 1405.94 48.2586   6
   3  -6  14 1462.30 56.0537   6
   3  -6  14 1553.51 59.8582   1
   3   6  14 1498.24 59.4399   1
  -3   6 -15 734.848 40.8975   1
  -3  -6 -15 660.212 39.0528   1
   3   6  15 734.547 31.2291   6
   3  -6  15 758.338 38.0864   6
   3  -6  15 729.874 39.9801   1
   3   6  15 754.969 40.6500   1
   3   6  15 686.607 34.9562   5
   3   6  16 281.416 24.1010   5
   3  -6  16 334.874 27.0028   6
   3   6  16 317.089 21.6288   6
  -3  -6 -16 268.405 27.2805   1
  -3   6 -16 263.755 26.3723   1
  -3   6 -17 67.0924 16.2813   1
  -3  -6 -17 62.6127 16.2536   1
   3  -6  17 72.3221 15.5779   6
   3   6  17 39.4306 10.8477   6
   3   6  17 75.6761 15.0924   5
  -3   6 -18 616.883 41.5413   1
  -3  -6 -18 627.692 42.0567   1
   3   6  18 607.527 31.7085   6
   3   6  18 578.731 35.8036   5
   3   6  19 251.245 20.8624   6
   3   6  20 1095.07 46.6803   6
   3  -7 -20 143.599 13.1895   6
   3  -7 -19 278.566 17.5339   6
  -3  -7  19 276.134 25.2388   3
  -3   7  19 245.733 24.2206   3
   3  -7 -19 290.953 30.0586   2
   3   7 -19 230.009 26.1092   2
   3   7 -18 2378.06 84.5247   6
   3  -7 -18 2299.74 67.6951   6
  -3  -7  18 2236.17 82.1336   3
  -3   7  18 2161.96 81.5599   3
   3  -7 -18 2373.25 91.8684   2
   3   7 -18 2237.66 87.5593   2
   3   7 -17 175.633 20.9237   6
   3  -7 -17 230.796 15.5531   6
  -3  -7  17 229.903 22.7452   3
  -3   7  17 189.716 21.0142   3
   3  -7 -17 216.200 24.8690   2
   3   7 -17 227.407 24.4970   2
   3   7 -16 447.607 31.7524   6
  -3  -7  16 459.701 30.8925   3
   3   7 -16 486.768 30.6595   3
   3  -7 -16 524.070 36.7027   2
   3   7 -16 520.196 35.1017   2
  -3  -7  15 103.760 16.1603   3
   3   7 -15 123.908 16.0141   3
   3  -7 -15 143.338 19.7997   2
   3   7 -15 129.793 18.4568   2
   3   7 -14 22.1326 8.84586   3
  -3  -7  14 33.2722 10.9668   3
   3  -7 -14 63.9272 13.2017   2
   3   7 -14 54.3435 12.4750   2
  -3  -7  13 1069.92 48.2988   3
   3   7 -13 1022.52 45.6868   3
   3   7 -13 1057.37 49.1504   2
   3  -7 -13 1169.35 52.5201   2
   3   7 -12 2530.62 83.3486   3
   3  -7 -12 2525.86 87.8808   2
   3   7 -12 2579.11 86.9899   2
   3   7 -11 864.290 40.2769   3
   3  -7 -11 946.845 44.6032   2
   3   7 -11 924.652 43.3223   2
   3   7 -10 3020.67 93.9486   3
   3   7 -10 3079.37 96.5380   2
   3  -7 -10 3068.86 97.1121   2
   3   7  -9 103.171 13.2569   3
   3  -7  -9 108.802 14.3676   2
   3   7  -9 141.300 15.7955   2
  -3  -7   9 144.438 15.8552   3
  -3   7   9 133.932 16.4014   2
  -3  -7   9 140.590 16.8732   2
  -3   7   8 727.822 37.3657   2
  -3  -7   8 808.960 38.5612   2
   3   7  -8 765.430 35.4115   3
  -3  -7   8 734.946 36.2463   3
   3   7  -8 737.522 35.1695   2
   3  -7  -8 764.396 36.0060   2
   3   7  -7-3.68441 5.41441   4
  -3   7   7 3.69425 7.20796   2
  -3  -7   7 7.43809 7.68354   2
  -3  -7   7 5.73639 6.91598   3
   3   7  -6 7.45909 4.98501   4
  -3  -7   6 6.58973 5.92382   3
  -3   7   6 3.40800 6.54984   2
  -3  -7   6 10.2550 6.67150   2
   3   7  -5 922.933 32.8846   4
  -3   7   5 922.628 38.9258   2
  -3  -7   5 878.159 38.0775   2
  -3  -7   5 934.255 39.8345   3
   3   7  -4 5289.15 132.757   4
  -3   7   4 5189.01 141.613   2
  -3   7   3 385.053 21.6722   2
   3   7  -3 388.562 21.3556   3
   3  -7  -2 3447.03 86.8721   5
   3  -7  -2 3647.82 100.194   4
   3   7  -2 3698.66 101.126   3
  -3   7   2 3811.68 102.383   2
   3  -7  -1 10.8701 5.32625   4
  -3   7   1 20.8654 6.26866   2
   3  -7  -1 5.88660 3.18191   5
   3   7  -1 17.3728 5.87604   3
   3  -7   0 15.2586 5.93379   4
   3   7   0 15.9584 5.62490   3
   3  -7   0 17.5978 4.12445   5
  -3  -7  -1 751.443 25.5573   4
   3  -7   1 780.834 32.2058   4
   3  -7   1 805.362 33.4849   1
   3   7   1 748.237 32.4468   1
   3  -7   1 722.244 25.8768   5
  -3  -7  -2 916.145 30.6618   4
   3  -7   2 1005.18 39.2855   1
   3   7   2 1000.97 39.0307   1
   3  -7   2 956.438 37.6130   6
   3  -7   2 1040.87 33.2505   5
  -3  -7  -3 1566.29 46.7349   4
   3  -7   3 1680.98 56.0841   1
   3   7   3 1710.61 56.1836   1
   3  -7   3 1603.80 54.5855   6
   3  -7   3 1643.48 49.5660   5
  -3   7  -4 1825.69 58.4558   4
   3  -7   4 1808.97 59.7072   1
   3   7   4 1738.25 58.8107   1
   3  -7   4 1784.80 58.9821   6
   3  -7   4 1730.22 53.7485   5
  -3   7  -5 2.69751 5.49797   4
   3   7   5 0.98402 5.76055   1
   3  -7   5 7.85836 6.56398   1
   3  -7   5 6.94843 6.15299   6
   3  -7   5 3.60172 4.92458   5
  -3   7  -6 142.392 13.4763   4
   3   7   6 147.486 14.6250   1
   3  -7   6 169.224 15.2516   1
   3  -7   6 165.556 15.0329   6
   3  -7   6 193.175 14.0526   5
  -3   7  -7 0.97822 5.36817   4
   3  -7   7 4.39484 6.81019   1
   3   7   7 1.10698 6.57744   1
   3  -7   7 1.72299 5.75669   5
   3   7   7 5.34318 3.47093   3
   3  -7   8 375.437 21.7174   5
  -3   7  -8 377.042 23.0035   4
   3  -7   8 371.411 24.1671   1
   3   7   8 394.846 24.6226   1
   3   7   8 364.189 18.1634   3
  -3   7  -9 1789.95 60.9766   4
   3   7   9 1706.19 52.2480   3
   3  -7   9 1796.47 63.0285   1
   3   7   9 1699.26 62.1623   1
  -3   7 -10 1146.05 45.9450   4
  -3   7 -10 1277.75 50.9253   1
  -3   7 -10 1036.89 34.3776   3
   3   7  10 1131.46 37.4697   3
   3  -7  10 1144.35 47.8893   1
   3   7  10 1208.78 48.9090   1
   3  -7  11 481.097 28.6754   6
  -3   7 -11 396.188 25.4066   4
  -3   7 -11 408.795 27.8786   1
  -3  -7 -11 406.026 27.8733   1
   3   7  11 356.416 17.7699   3
  -3   7 -11 341.687 15.5562   3
   3  -7  11 392.960 26.7530   1
   3   7  11 435.388 28.2372   1
   3   7  12 944.527 36.8704   6
   3  -7  12 993.867 43.8667   6
  -3  -7 -12 902.832 44.5249   1
  -3   7 -12 883.892 43.7521   1
  -3   7 -12 933.875 41.6785   4
   3   7  12 841.362 30.0351   3
  -3   7 -12 755.402 26.7906   3
   3  -7  12 975.228 44.6102   1
   3   7  12 945.737 44.1007   1
   3   7  13 64.1034 7.69504   3
   3  -7  13 90.1526 14.7896   6
   3   7  13 107.013 12.7591   6
  -3   7 -13 126.916 16.0459   4
  -3   7 -13 73.2071 6.57655   3
   3  -7  13 116.325 16.9804   1
   3   7  13 74.5394 14.8805   1
  -3   7 -13 113.687 17.2169   1
  -3  -7 -13 93.4707 16.2250   1
   3   7  14 157.250 14.6576   6
   3  -7  14 181.020 19.1441   6
  -3   7 -14 154.095 20.0563   1
  -3  -7 -14 138.883 19.2185   1
   3   7  14 133.600 9.90371   3
   3  -7  14 155.062 19.1031   1
   3   7  14 187.772 20.8393   1
   3  -7  15 22.3369 11.0410   6
   3   7  15 31.6819 8.45978   6
  -3   7 -15 31.4439 12.3453   1
  -3  -7 -15 14.3148 10.6467   1
   3   7  15 25.8431 5.38775   3
   3  -7  15 26.1420 12.0578   1
   3   7  15 19.1380 11.0858   1
   3   7  16 60.0602 13.4468   5
   3   7  16 19.4391 4.76312   3
   3  -7  16 23.3016 11.7648   6
   3   7  16 36.3109 9.43813   6
  -3   7 -16 30.9462 12.9975   1
  -3  -7 -16 22.3071 12.1429   1
   3   7  17 819.268 39.4488   5
   3  -7  17 757.988 41.0157   6
   3   7  17 818.450 33.1696   6
  -3   7 -17 759.643 43.1317   1
  -3  -7 -17 811.037 45.0090   1
   3   7  18 240.569 19.7989   6
   3   7  19 73.1977 12.7452   6
   3   8 -19 108.996 20.0356   2
   3  -8 -18 194.538 24.8843   2
   3   8 -18 165.349 22.2889   2
  -3   8  18 156.196 19.6651   3
  -3  -8  18 151.297 19.2815   3
   3  -8 -17-2.08925 11.2648   2
   3   8 -17 7.52403 10.1420   2
   3   8 -17-7.72059 10.6712   3
  -3  -8  17 4.72634 9.89581   3
   3   8 -17-8.48831 11.2106   6
   3  -8 -16 3.97869 11.4670   2
   3   8 -16 7.18462 10.1904   2
   3   8 -16 1.50032 10.4809   3
  -3  -8  16 10.8034 10.0698   3
   3   8 -16-1.67158 10.0769   6
   3   8 -15 720.643 41.1721   2
   3  -8 -15 701.191 42.0681   2
   3   8 -15 760.868 38.8473   3
  -3  -8  15 680.033 39.0605   3
  -3  -8  14 31.0303 11.2992   3
   3   8 -14 56.4073 12.4730   3
   3  -8 -14 40.5423 13.3474   2
   3   8 -14 25.8984 10.9734   2
   3  -8 -13 308.860 26.2205   2
   3   8 -13 313.600 24.9649   2
  -3  -8  13 257.073 22.6976   3
   3   8 -13 331.767 24.1265   3
   3   8 -12 1594.17 62.3565   2
   3   8 -12 1502.80 59.5563   3
   3   8 -11 33.4349 9.37411   3
   3  -8 -11 26.0744 10.2413   2
   3   8 -11 16.4050 8.14151   2
   3   8 -10 9.97319 6.96838   3
   3  -8 -10 21.2263 9.27543   2
   3   8 -10 23.9075 8.51353   2
  -3   8   9 809.565 40.4556   2
  -3  -8   9 844.818 41.1886   2
  -3  -8   9 871.642 40.9156   3
   3   8  -9 817.393 38.2418   3
   3   8  -9 841.704 38.5235   2
   3  -8  -9 840.372 39.1750   2
   3   8  -8-3.41517 5.83590   4
   3  -8  -8 3.42106 6.36428   2
   3   8  -8 1.08696 5.96432   2
  -3  -8   8-1.24409 6.58692   3
   3   8  -8 4.70920 5.87681   3
  -3   8   8-2.59182 7.35200   2
  -3  -8   8 1.32673 7.52681   2
  -3   8   7 3156.57 96.0760   2
  -3  -8   7 3103.33 95.5116   2
   3   8  -7 3028.47 87.3564   4
  -3   8   6 2998.35 92.6816   2
  -3  -8   6 3078.97 92.9645   2
   3   8  -6 3013.70 85.2570   4
  -3  -8   5 7.46867 6.79298   2
  -3   8   5 12.6902 7.15108   2
   3   8  -5 9.48970 5.17333   4
  -3   8   4 2381.16 72.8342   2
   3   8  -4 2217.54 64.9120   4
   3   8  -3 659.580 31.1621   3
  -3   8   3 692.093 30.9766   2
   3  -8  -3 673.390 31.0551   4
  -3   8   2 15.3942 5.84832   2
   3   8  -2 9.71617 6.11504   3
   3  -8  -2 27.9473 6.92118   4
   3  -8  -1 2037.71 65.6667   4
   3   8  -1 2043.84 65.4483   3
  -3   8   1 2048.32 65.0014   2
   3  -8   0 59.5235 9.05048   4
  -3   8   0 64.0132 8.74113   2
   3  -8   0 34.2912 7.66303   6
   3   8   0 45.4131 8.30303   3
   3  -8   1 2275.22 70.1650   1
   3   8   1 2260.29 69.9848   1
   3   8   1 2206.74 69.3230   3
   3  -8   1 2352.76 69.3796   6
  -3  -8  -1 2202.67 62.6541   4
   3  -8   1 2238.54 70.8791   4
   3  -8   2 3616.95 99.4806   1
   3   8   2 3615.56 99.1258   1
  -3  -8  -2 3307.89 90.7651   4
   3   8   2 3461.24 97.7250   3
   3  -8   2 3475.19 98.0499   6
  -3  -8  -3 18.1229 5.19041   4
   3  -8   3 33.0179 7.95021   1
   3   8   3 34.8663 7.89827   1
   3  -8   3 18.4804 7.00568   6
   3   8   3 29.3457 6.96393   3
   3  -8   4 577.581 27.4889   1
   3   8   4 522.987 26.4310   1
  -3  -8  -4 508.530 21.9627   4
   3   8   4 542.530 25.2113   3
   3  -8   4 554.975 27.4893   6
  -3   8  -5 4.91185 5.57691   4
   3  -8   5 12.7122 6.38320   1
   3   8   5 11.7470 5.98819   1
   3  -8   5 7.19092 6.01645   6
  -3   8  -6 10.1221 6.10458   4
   3  -8   6 5.19760 6.44560   1
   3   8   6 8.34210 6.37779   1
   3  -8   6 8.62749 6.59580   6
  -3   8  -7 953.682 40.1486   4
   3  -8   7 929.034 40.2428   1
   3   8   7 944.139 40.3522   1
   3  -8   7 1061.12 42.4268   6
  -3   8  -8 345.887 22.7000   4
   3  -8   8 346.741 23.0661   1
   3   8   8 301.181 21.6909   1
  -3   8  -9 689.377 34.2335   4
   3  -8   9 713.494 35.2193   1
   3   8   9 743.476 35.7981   1
  -3   8 -10 1727.72 62.8725   4
   3   8  10 1788.25 64.3459   1
   3  -8  10 1777.29 64.1406   1
  -3   8 -11 213.626 18.8992   4
  -3  -8 -11 220.366 21.1940   1
  -3   8 -11 177.971 19.2780   1
  -3   8 -11 180.323 11.7120   3
   3  -8  11 166.101 17.9675   1
   3   8  11 202.886 19.9494   1
   3   8  12 243.586 17.1069   6
  -3   8 -12 274.411 22.8769   1
  -3  -8 -12 255.556 22.7286   1
  -3   8 -12 233.097 20.5821   4
  -3   8 -12 205.264 12.3988   3
   3  -8  12 251.805 22.7318   1
   3   8  12 237.164 21.9866   1
   3  -8  13-1.50263 9.06226   6
   3   8  13 20.7898 7.65555   6
  -3   8 -13 25.1760 9.62376   1
  -3  -8 -13 37.2066 10.5580   1
  -3   8 -13 11.1354 8.63151   4
   3   8  13 6.47179 3.96618   3
  -3   8 -13 12.4996 4.80751   3
   3  -8  13 15.4963 9.86460   1
   3   8  13 7.72460 9.83461   1
   3  -8  14 61.5452 14.3432   6
   3   8  14 63.7433 10.4251   6
  -3   8 -14 77.8271 15.0455   1
  -3  -8 -14 71.4379 15.3544   1
  -3   8 -14 45.1101 12.5523   4
   3   8  14 47.2443 7.12146   3
  -3   8 -14 35.3065 5.79362   3
   3  -8  14 90.1230 14.2190   1
   3   8  14 99.7140 15.5830   1
   3  -8  15 117.033 17.9352   6
   3   8  15 110.407 12.9051   6
  -3   8 -15 51.1554 6.00491   3
  -3   8 -15 75.3196 14.0033   4
   3   8  15 92.0185 9.18138   3
  -3   8 -15 89.9747 16.7196   1
  -3  -8 -15 95.8429 17.8011   1
   3   8  16 836.308 41.1321   5
   3  -8  16 918.150 46.0390   6
   3   8  16 849.539 34.5304   6
  -3   8 -16 851.093 42.6665   4
  -3   8 -16 852.625 46.0730   1
  -3  -8 -16 836.466 45.7755   1
   3   8  17 22.6890 11.1270   5
   3   8  17 21.8811 5.56122   3
   3   8  17 29.5543 9.48495   6
  -3   8 -17 28.1688 13.2678   1
  -3  -8 -17 17.2779 11.9107   1
   3   8  18 286.600 13.7482   3
   3   8  18 442.425 24.5917   6
   3  -9 -18 63.1982 17.2889   2
   3   9 -18 68.0237 15.8156   2
   3  -9 -18 81.6078 8.31785   6
   3  -9 -17 293.675 29.0072   2
   3   9 -17 293.799 27.4123   2
   3   9 -17 289.230 25.1067   3
   3  -9 -17 289.184 14.7507   6
   3   9 -16 315.577 27.7779   2
   3   9 -16 360.776 27.2571   3
   3  -9 -16 338.340 30.1344   2
   3  -9 -16 372.691 16.8166   6
   3   9 -15 827.344 41.6447   3
   3   9 -15 860.465 44.5961   2
   3  -9 -15 902.694 47.5783   2
   3  -9 -15 782.266 27.9083   6
   3   9 -14 2040.77 72.8793   3
   3  -9 -14 2193.41 79.2864   2
   3   9 -14 1938.79 74.4027   2
   3  -9 -14 1959.49 56.4306   6
   3   9 -13-2.83550 8.42350   3
   3  -9 -13-3.31738 9.10159   2
   3   9 -13 1.51911 8.19070   2
   3  -9 -12 207.393 20.3439   2
   3   9 -12 212.446 20.2716   2
   3   9 -12 155.215 17.3919   3
   3  -9 -11 157.192 17.7417   2
   3   9 -11 139.380 17.0494   2
   3   9 -11 135.266 16.3635   3
   3   9 -10 504.473 26.3311   4
   3  -9 -10 515.063 30.0324   2
   3   9 -10 432.738 27.5341   2
   3   9 -10 459.609 28.4260   3
   3   9  -9 1165.42 45.2838   4
   3   9  -9 1303.22 51.3253   3
   3  -9  -9 1290.54 50.3602   2
   3   9  -9 1264.04 49.1740   2
   3   9  -8 1153.99 48.8371   3
  -3   9   8 1188.66 50.3615   2
  -3  -9   8 1341.60 52.6894   2
   3   9  -8 1277.22 45.9051   4
  -3   9   7 1275.65 50.7627   2
  -3  -9   7 1300.44 51.2829   2
   3   9  -7 1274.38 45.7602   4
  -3   9   6 2078.80 69.2330   2
  -3  -9   6 2072.52 69.3745   2
   3   9  -6 1999.14 62.9988   4
  -3   9   5 8.51401 7.19317   2
  -3  -9   5 2.16649 5.84058   2
   3   9  -5-5.21401 5.87894   4
  -3   9   4 29.7968 8.24217   2
   3   9  -4 22.7099 6.18023   4
   3  -9  -3 576.340 29.4510   4
   3   9  -3 609.560 30.2568   3
  -3   9   3 574.251 28.0942   2
   3  -9  -2 19.4869 6.37876   4
  -3   9   2 28.9258 6.85115   2
   3  -9  -2 19.0837 6.09888   6
   3   9  -2 27.1390 7.46380   3
   3  -9  -1 2862.73 82.2335   6
   3  -9  -1 2789.70 86.4641   4
   3   9  -1 2849.86 86.7774   3
  -3   9   1 3028.92 85.6904   2
   3  -9   0 967.853 35.8616   6
   3  -9   0 911.047 38.3621   4
   3  -9   0 926.790 36.7203   1
   3   9   0 843.945 35.6371   1
   3   9   0 861.868 36.9948   3
  -3   9   0 860.370 35.2569   2
   3  -9   1 313.656 19.1491   1
   3   9   1 324.874 19.6167   1
   3   9   1 303.710 19.8626   3
   3  -9   1 298.134 18.7058   6
  -3  -9  -1 303.293 16.2292   4
   3  -9   1 324.176 21.1280   4
   3   9   2 445.857 23.6821   1
   3  -9   2 493.627 24.8433   1
   3  -9   2 477.939 26.3048   4
  -3  -9  -2 476.271 21.0288   4
   3   9   2 451.560 24.4032   3
   3  -9   2 445.566 23.7839   6
  -3  -9  -3 60.2085 7.63591   4
   3  -9   3 62.7792 9.49607   1
   3   9   3 37.7778 8.14464   1
   3  -9   3 63.1580 9.78675   6
   3   9   3 62.4524 9.86290   3
  -3  -9  -4 173.057 12.5030   4
   3  -9   4 162.893 14.5395   1
   3   9   4 131.191 13.2216   1
   3   9   4 170.240 14.1474   3
   3  -9   4 188.973 16.3029   6
  -3   9  -5 4046.57 113.196   4
   3   9   5 3912.52 110.428   1
   3  -9   5 3826.83 110.213   1
   3   9   5 3918.11 108.939   3
   3  -9   5 3937.51 112.135   6
   3  -9   6 173.526 16.5052   6
   3   9   6 160.284 13.9890   3
   3   9   6 143.816 14.5404   1
   3  -9   6 177.220 15.8139   1
  -3   9  -6 174.874 16.1178   4
   3  -9   7 2228.03 73.8979   6
   3   9   7 2165.15 68.6431   3
   3   9   7 2229.05 72.6125   1
   3  -9   7 2402.32 73.9207   1
  -3   9  -7 2261.81 74.0622   4
   3  -9   8 595.955 31.4054   6
  -3   9  -8 568.488 30.4698   4
   3   9   8 527.035 25.9271   3
   3  -9   8 565.496 29.8989   1
   3   9   8 582.516 30.3154   1
  -3   9  -9 64.3700 11.7157   4
   3  -9   9 58.1750 12.3874   6
   3   9   9 71.6413 9.57082   3
   3  -9   9 72.8711 11.9685   1
   3   9   9 75.4317 12.3015   1
   3   9  10 11.7063 6.21257   3
  -3   9 -10 17.8539 8.01792   4
   3  -9  10 15.2324 8.58666   1
   3   9  10 18.9816 8.16249   1
  -3   9 -11 370.297 18.9769   3
  -3   9 -11 465.952 28.7022   4
   3  -9  11 442.578 28.1057   1
   3   9  11 439.770 28.5089   1
  -3  -9 -12 276.690 24.3426   1
  -3   9 -12 253.195 23.6051   1
  -3   9 -12 255.539 22.0220   4
   3   9  12 264.037 17.8606   6
  -3   9 -12 233.449 14.3304   3
   3  -9  12 247.667 22.5652   1
   3   9  12 307.453 24.2524   1
  -3   9 -13 2331.12 81.2175   1
  -3  -9 -13 2249.51 80.6458   1
  -3   9 -13 2359.58 79.6145   4
   3   9  13 2308.76 68.7619   6
  -3   9 -13 1993.56 61.9465   3
   3  -9  13 2241.41 79.8195   1
   3   9  13 2347.38 80.8745   1
  -3   9 -14 542.414 34.7016   1
  -3  -9 -14 567.182 36.0054   1
  -3   9 -14 578.831 34.1629   4
   3   9  14 547.538 26.7190   6
  -3   9 -14 461.530 21.0434   3
   3   9  14 604.573 36.4831   1
   3   9  15 655.758 28.8547   6
   3  -9  15 666.896 38.7901   6
  -3   9 -15 612.163 37.9553   1
  -3  -9 -15 590.738 37.6461   1
  -3   9 -15 631.712 36.6809   4
  -3   9 -16 428.170 33.1562   1
  -3  -9 -16 401.295 32.6900   1
   3   9  16 452.021 24.5111   6
  -3   9 -16 481.927 32.5087   4
   3   9  17 31.9367 11.9222   5
   3   9  17 34.0782 9.45623   6
  -3   9 -17 29.8258 14.1030   1
  -3  -9 -17 19.0450 13.0356   1
   3 -10 -18 2.16388 14.1180   2
   3  10 -18-1.91523 12.4958   2
   3 -10 -17 503.921 37.7682   2
   3  10 -17 489.958 34.7531   2
   3 -10 -17 453.081 15.3418   6
   3  10 -16 403.187 29.1578   3
   3  10 -16 383.031 30.5691   2
   3 -10 -16 367.534 31.7856   2
   3 -10 -16 421.148 15.0756   6
   3  10 -15 351.112 27.4689   3
   3  10 -15 339.960 27.9536   2
   3 -10 -15 371.882 30.8905   2
   3  10 -15 372.525 30.0470   6
   3 -10 -15 360.045 14.3671   6
   3 -10 -14 3.52603 10.1620   2
   3  10 -14 1.58214 8.53047   2
   3  10 -14 1.50533 8.25997   3
   3 -10 -14-1.37635 4.37905   6
   3 -10 -13 545.764 34.5150   2
   3  10 -13 452.761 30.7321   2
   3  10 -13 461.322 30.1630   3
   3  10 -12 533.292 29.6718   4
   3 -10 -12 583.758 33.9245   2
   3  10 -12 542.642 31.8157   2
   3  10 -12 515.253 31.7305   3
   3  10 -11 951.382 39.9286   4
   3 -10 -11 858.698 41.9254   2
   3  10 -11 916.695 41.8288   2
   3  10 -11 839.082 41.6022   3
   3  10 -10 253.443 19.1894   4
   3  10 -10 277.352 20.9091   2
   3 -10 -10 253.381 21.0215   2
   3  10 -10 275.335 22.1607   3
   3  10  -9 750.910 37.8612   3
   3  10  -9 786.552 34.7321   4
   3  10  -8 841.997 39.3808   3
  -3  10   8 785.843 38.5635   2
   3  10  -8 792.164 34.7531   4
  -3  10   7 38.7146 10.4989   2
  -3 -10   7 52.0477 10.5470   2
   3  10  -7 31.8069 8.35864   4
  -3  10   6 79.5322 12.5873   2
  -3 -10   6 70.9837 11.4340   2
   3  10  -6 100.802 11.4867   4
   3 -10  -6 103.243 9.42538   6
   3  10  -5 1186.11 43.1308   4
   3 -10  -5 1228.11 40.1179   6
  -3  10   5 1223.91 47.2689   2
  -3 -10   5 1253.70 47.7190   2
   3 -10  -4 11.8633 7.15137   4
  -3  10   4-5.98072 7.25331   2
   3 -10  -4-1.31573 4.83379   6
   3  10  -4 2.37073 6.39116   3
   3 -10  -3 2640.29 84.9152   4
  -3  10   3 2668.35 81.4911   2
   3  10  -3 2818.42 86.2587   3
   3 -10  -3 2757.82 77.1826   6
   3 -10  -2 1139.77 46.2834   4
  -3  10   2 1145.81 42.8914   2
   3  10  -2 1210.93 47.1163   3
   3 -10  -2 1177.67 40.7723   6
   3 -10  -1 105.987 11.0989   6
   3 -10  -1 102.772 12.6592   4
   3  10  -1 103.940 13.0806   3
  -3  10   1 116.733 11.7833   2
   3 -10   0 658.367 29.1353   1
   3  10   0 618.976 28.6392   1
   3 -10   0 624.159 28.1600   6
   3 -10   0 650.032 32.5720   4
   3  10   0 652.934 31.9230   3
  -3  10   0 671.914 29.4849   2
   3  10   1 131.123 12.3517   1
   3 -10   1 143.120 12.8826   1
   3 -10   1 150.323 13.5394   6
  -3 -10  -1 144.038 11.7943   4
   3 -10   1 126.429 14.4827   4
   3  10   1 134.949 14.0283   3
  -3  10  -1 153.149 12.9862   2
   3 -10   2 176.654 16.7986   4
  -3 -10  -2 185.467 13.3199   4
   3 -10   2 141.176 12.9815   1
   3  10   2 182.160 14.4905   1
   3  10   2 180.078 15.8890   3
   3 -10   2 183.630 15.2693   6
  -3 -10  -3 2303.31 69.5566   4
   3 -10   3 2472.86 72.9882   1
   3  10   3 2311.96 72.0373   1
   3  10   3 2395.63 75.4175   3
   3 -10   3 2506.48 75.4016   6
  -3 -10  -4 340.862 18.6713   4
   3 -10   4 326.213 20.3013   1
   3  10   4 301.049 19.5346   1
   3  10   4 364.370 22.0252   3
   3 -10   4 311.151 20.9893   6
   3 -10   5 3378.80 96.2046   6
   3  10   5 3320.10 94.4913   3
   3  10   5 3067.65 92.2756   1
   3 -10   5 3223.77 93.2036   1
  -3 -10  -5 2992.06 88.6469   4
   3 -10   6 2147.68 70.6323   6
  -3  10  -6 2129.11 71.4853   4
   3  10   6 2188.25 68.6699   3
   3 -10   6 2029.16 67.5660   1
   3  10   6 2072.84 67.9190   1
  -3  10  -7 37.3597 9.70329   4
   3 -10   7 32.7024 8.83595   1
   3  10   7 42.3612 9.86458   1
   3 -10   7 31.5445 9.61030   6
   3  10   7 34.8090 8.45701   3
  -3  10  -8-1.24478 7.61058   4
   3  10   8 11.7730 5.91469   3
   3  10   8-2.22675 6.31697   1
   3 -10   8 11.0960 7.23997   1
   3 -10   8 1.27170 7.66643   6
  -3  10  -9 145.621 16.2445   4
   3 -10   9 113.010 14.3961   1
   3  10   9 124.952 14.7121   1
   3  10   9 144.220 13.8407   3
   3 -10   9 117.305 15.1076   6
  -3  10 -10 55.9700 11.9747   4
   3  10  10 53.2064 9.89735   3
   3 -10  10 42.0305 11.5709   6
   3  10  10 50.3061 11.4522   1
   3 -10  10 59.7346 12.4111   1
   3 -10  11 465.427 30.5743   6
   3  10  11 462.651 24.4181   3
  -3  10 -11 417.622 21.4301   3
   3 -10  11 454.252 29.1109   1
   3  10  11 485.799 29.6990   1
  -3  10 -11 536.754 31.3520   4
   3  10  12 473.366 23.9155   6
  -3  10 -12 483.767 30.6761   4
  -3  10 -12 428.292 21.3065   3
   3 -10  12 445.507 29.6713   1
   3  10  12 455.224 30.0580   1
   3  10  13 54.3374 9.43142   6
  -3  10 -13 45.3663 12.5852   4
  -3  10 -13 45.6824 8.17608   3
  -3  10 -13 86.2666 16.0600   1
   3  10  13 66.7253 13.7086   1
   3 -10  13 82.5396 16.0121   1
   3  10  14 761.974 31.4525   6
  -3  10 -14 771.134 41.1171   4
  -3  10 -14 697.668 28.4468   3
  -3  10 -14 773.604 42.1493   1
  -3 -10 -14 709.010 41.2216   1
  -3  10 -15 20.1762 11.7878   1
  -3 -10 -15 48.4697 14.4725   1
   3  10  15 58.3523 9.91980   6
  -3  10 -15 43.5076 13.2754   4
  -3  10 -16 51.0692 14.9579   1
  -3 -10 -16 57.6286 15.9411   1
   3  10  16 55.4601 9.73044   6
  -3  10 -16 54.6253 13.5516   4
  -3  10 -17 97.4560 18.0721   1
  -3 -10 -17 116.489 19.4288   1
   3  10  17 71.1057 9.78584   3
   3  11 -18 170.878 22.3990   2
   3 -11 -18 164.915 23.6165   2
   3 -11 -17 8.21184 11.2650   2
   3  11 -17-1.79700 11.1379   2
   3  11 -16-3.16843 9.95097   4
   3 -11 -16-3.92656 11.8351   2
   3  11 -16-1.72274 9.45320   2
   3  11 -15-2.97992 8.31583   4
   3 -11 -15 11.1864 11.8640   2
   3  11 -15 1.64647 9.78267   2
   3  11 -15 9.55747 9.18191   3
   3  11 -14 563.979 37.2500   6
   3  11 -14 583.483 35.1978   3
   3 -11 -14 585.599 37.5082   2
   3  11 -14 538.532 34.3511   2
   3  11 -14 581.987 33.4299   4
   3  11 -13 937.489 40.7349   4
   3  11 -13 913.491 42.7927   3
   3 -11 -13 1006.81 45.9389   2
   3  11 -13 941.598 42.8747   2
   3  11 -12 9.92012 8.47685   4
   3 -11 -12 25.2134 9.43856   2
   3  11 -12 25.6026 9.90192   2
   3 -11 -12 0.92720 3.73680   6
   3  11 -12 4.50318 9.04955   3
   3 -11 -11 711.892 23.1540   6
   3  11 -11 771.188 39.5206   3
   3  11 -11 806.249 38.0409   2
   3  11 -11 795.283 36.7781   4
   3 -11 -10 636.623 22.2455   6
   3  11 -10 765.562 38.6202   3
   3  11 -10 766.280 35.6971   2
   3  11 -10 710.169 34.1861   4
   3  11  -9 403.747 27.0056   3
   3 -11  -9 353.048 15.3789   6
   3  11  -9 403.306 24.4206   4
   3  11  -8 246.824 21.0820   3
   3 -11  -8 205.647 12.2449   6
   3  11  -8 263.666 19.2867   4
   3  11  -7 748.739 33.4134   4
   3 -11  -7 703.916 25.8544   6
  -3  11   7 717.893 35.6345   2
  -3 -11   7 742.113 36.5187   2
   3  11  -6 222.874 16.9591   4
   3 -11  -6 197.314 12.7674   6
  -3  11   6 226.798 19.0089   2
  -3 -11   6 237.371 19.2859   2
   3 -11  -5 1157.04 49.5954   4
  -3  11   5 1188.61 46.3512   2
  -3 -11   5 1242.73 47.4366   2
   3 -11  -5 1167.36 38.7027   6
   3 -11  -4 3.93666 4.77506   6
   3 -11  -4 3.85323 7.16875   4
   3  11  -4 3.79809 6.82662   3
  -3  11   4 3.00980 6.38463   2
   3 -11  -3 3.73267 7.72383   4
  -3  11   3 20.6147 6.89861   2
   3  11  -3 28.4916 8.09380   3
   3 -11  -3 21.8903 6.40982   6
   3 -11  -2 12.2072 7.25990   4
  -3  11   2 24.9934 6.43938   2
   3  11  -2 12.1935 7.14455   3
   3 -11  -2 8.30517 5.44938   6
   3 -11  -1 5.62353 5.61813   6
   3 -11  -1 9.74686 5.41777   4
   3  11  -1 4.78365 6.33738   3
   3 -11  -1 22.1382 6.01672   1
   3  11  -1 11.1642 5.18363   1
  -3  11   1 16.4724 5.86574   2
   3 -11   0 143.828 13.1662   6
   3 -11   0 129.839 14.1345   4
   3 -11   0 142.123 12.5206   1
   3  11   0 126.907 12.2098   1
   3  11   0 142.396 15.3924   3
  -3  11   0 134.649 12.4251   2
   3 -11   1 2279.47 69.5945   6
   3 -11   1 2205.87 67.8467   1
   3  11   1 2166.28 67.7112   1
  -3 -11  -1 2251.40 67.9719   4
   3 -11   1 2262.88 75.1842   4
   3  11   1 2241.32 73.7122   3
  -3  11  -1 2236.60 68.1755   2
  -3 -11  -2 16.2893 6.10393   4
   3 -11   2 21.4468 7.27633   4
   3 -11   2 11.4392 4.86153   1
   3  11   2 11.6627 6.24296   1
   3 -11   2 8.64238 7.26103   6
   3  11   2 1.14537 6.81003   3
  -3 -11  -3 2366.01 71.0732   4
   3 -11   3 2343.46 71.5349   1
   3  11   3 2253.75 70.9284   1
   3  11   3 2520.53 77.7401   3
   3 -11   3 2427.84 74.7594   6
   3 -11   4 370.302 22.5375   6
  -3 -11  -4 311.689 18.7511   4
   3  11   4 310.374 21.5744   3
   3  11   4 299.726 19.3420   1
   3 -11   4 304.350 19.3954   1
  -3 -11  -5 8.64718 6.35622   4
   3 -11   5 3.71663 5.91523   1
   3  11   5 13.1414 6.62892   1
   3  11   5 12.3526 7.05581   3
   3 -11   5 2.26880 7.03327   6
   3 -11   6 172.824 16.7187   6
   3  11   6 135.333 14.8659   3
   3 -11   6 175.858 15.4271   1
   3  11   6 161.797 15.0413   1
  -3  11  -6 179.746 17.5868   4
   3 -11   7 490.557 28.7670   6
  -3  11  -7 481.211 28.9935   4
   3  11   7 478.123 26.6041   3
   3 -11   7 446.117 25.6270   1
   3  11   7 472.907 26.0639   1
  -3  11  -8 56.7521 11.9017   4
   3  11   8 64.2409 11.2019   3
   3  11   8 62.3739 11.4213   1
   3 -11   8 80.9120 12.3525   1
   3 -11   8 77.6734 13.5033   6
   3 -11   9 2159.83 74.5084   6
   3  11   9 2064.63 68.8542   3
   3 -11   9 2062.23 70.5815   1
   3  11   9 2165.15 71.3999   1
  -3  11  -9 2117.77 74.2186   4
   3 -11  10 167.460 18.9897   6
   3 -11  10 122.159 15.8423   1
   3  11  10 149.846 16.8571   1
  -3  11 -10 136.376 17.2592   4
   3 -11  11 1300.98 54.4640   6
  -3  11 -11 1141.06 42.7952   3
   3 -11  11 1291.30 52.2384   1
   3  11  11 1223.54 51.0214   1
  -3  11 -11 1306.04 54.0150   4
   3 -11  12 320.409 27.6618   6
   3  11  12 409.697 21.3356   6
  -3  11 -12 331.711 26.8792   4
  -3  11 -12 356.412 20.3662   3
   3 -11  12 354.169 26.6112   1
   3  11  12 368.572 27.1938   1
  -3  11 -13 103.738 16.4897   4
  -3  11 -13 95.0222 11.0891   3
   3 -11  13 110.132 18.2161   6
   3  11  13 97.0986 11.5034   6
  -3  11 -14 98.6719 11.0376   3
   3  11  14 101.397 11.5196   6
  -3  11 -14 135.465 18.8223   4
  -3  11 -15 504.229 34.3060   4
  -3  11 -15 537.053 34.9925   1
  -3 -11 -15 528.626 36.0479   1
   3  11  15 479.040 24.0630   6
  -3 -11 -16 160.671 22.1014   1
  -3  11 -16 180.817 22.0467   1
  -3 -11 -17 1504.61 65.7233   1
  -3  11 -17 1402.51 63.8290   1
   3 -12 -18 38.3301 15.8091   2
   3  12 -18 20.3488 13.3437   2
   3 -12 -17 290.791 29.2278   2
   3  12 -17 213.990 24.0028   2
   3  12 -16 689.388 39.6765   4
   3 -12 -16 789.951 45.5618   2
   3  12 -16 669.648 40.3515   2
   3  12 -15 816.222 42.2330   4
   3 -12 -15 845.200 46.2418   2
   3  12 -15 800.945 42.9415   2
   3  12 -14 68.3359 13.8391   4
   3 -12 -14 59.2079 14.2887   2
   3  12 -14 47.7836 13.0816   2
   3  12 -14 84.1138 14.9056   3
   3  12 -13 881.313 47.2837   6
   3  12 -13 864.651 44.3116   3
   3 -12 -13 976.791 46.1028   2
   3  12 -13 907.892 42.3423   4
   3  12 -12 574.548 34.9269   3
   3  12 -12 532.382 31.3291   2
   3 -12 -12 639.155 35.2223   2
   3  12 -12 539.638 31.2953   4
   3  12 -11 298.916 24.8815   3
   3  12 -11 237.159 20.5210   2
   3  12 -11 265.792 21.4623   4
   3 -12 -10 96.3626 6.55046   6
   3  12 -10 119.184 16.5881   3
   3  12  -9 1510.12 53.3371   4
   3  12  -9 1504.57 57.5122   3
   3  12  -8 959.719 40.3329   4
   3 -12  -8 866.511 28.7333   6
   3  12  -8 1019.55 45.4904   3
   3 -12  -7 1150.83 36.6809   6
   3  12  -7 1306.39 47.8413   4
   3  12  -6 29.6835 9.05653   4
  -3  12   6 22.5141 8.68519   2
  -3 -12   6 38.0108 10.0170   2
   3 -12  -6 28.3762 6.30273   6
   3 -12  -5 153.239 17.8426   4
  -3  12   5 159.436 15.3561   2
  -3 -12   5 158.779 15.9660   2
   3 -12  -5 148.624 11.5544   6
   3 -12  -4 51.5301 7.78560   6
   3 -12  -4 49.7896 11.6157   4
   3  12  -4 72.9948 12.3949   3
  -3  12   4 74.1887 10.9446   2
   3 -12  -3 145.426 16.6585   4
   3 -12  -3 155.863 12.6520   6
   3  12  -3 133.352 15.8191   3
  -3  12   3 166.617 14.6763   2
   3 -12  -2 775.710 38.7743   4
   3 -12  -2 848.544 32.7077   6
   3  12  -2 890.940 40.6209   3
  -3  12   2 823.155 34.2151   2
  -3  12   1 1393.27 47.8858   2
   3 -12  -1 1374.07 54.6101   4
   3 -12  -1 1394.08 47.8192   1
   3  12  -1 1335.77 47.0229   1
   3  12  -1 1435.39 55.0846   3
   3 -12  -1 1372.07 47.0345   6
   3 -12   0 318.847 19.6758   6
   3 -12   0 335.172 23.5906   4
   3 -12   0 292.993 18.3865   1
   3  12   0 328.911 19.2935   1
   3  12   0 340.229 23.9435   3
  -3  12   0 354.679 19.9636   2
   3 -12   1 1242.26 45.1830   6
   3 -12   1 1282.02 51.7317   4
  -3 -12  -1 1223.79 44.7749   4
   3 -12   1 1175.32 42.7706   1
   3  12   1 1150.18 42.4472   1
   3  12   1 1366.47 51.5224   3
  -3  12  -1 1261.20 44.1937   2
   3 -12   2 276.355 19.5579   6
   3 -12   2 241.610 16.7451   1
   3  12   2 284.681 17.5944   1
  -3 -12  -2 302.279 19.0436   4
   3 -12   2 325.165 23.6110   4
   3  12   2 347.319 23.3860   3
  -3  12  -2 278.781 17.4703   2
  -3 -12  -3 11.0275 6.14989   4
   3 -12   3 21.2716 6.46655   1
   3  12   3 14.8800 6.08393   1
   3 -12   3 16.8429 8.03418   6
   3  12   3 11.2164 7.93788   3
  -3 -12  -4 58.7401 9.75756   4
   3 -12   4 67.5260 10.3404   1
   3  12   4 61.6465 9.48192   1
   3  12   4 66.8735 11.4551   3
   3 -12   4 77.6580 12.2145   6
   3 -12   5 140.520 15.7434   6
   3  12   5 180.112 17.2640   3
   3  12   5 173.992 14.7840   1
   3 -12   5 159.444 14.4273   1
  -3 -12  -5 175.737 15.3452   4
   3 -12   6 1296.42 50.6241   6
   3  12   6 1248.24 49.7180   3
   3 -12   6 1244.31 45.9723   1
   3  12   6 1229.19 45.9095   1
  -3 -12  -6 1246.71 46.2883   4
   3 -12   7 1083.84 45.9404   6
  -3  12  -7 1020.95 45.9709   4
   3  12   7 1044.42 44.0183   3
   3  12   7 973.084 40.3361   1
   3 -12   7 1020.80 41.1191   1
  -3  12  -8 54.5907 12.1506   4
   3  12   8 35.7578 10.1462   3
   3 -12   8 56.0464 10.8703   1
   3  12   8 36.4857 9.83961   1
   3 -12   8 65.6213 13.6204   6
   3 -12   9 558.058 33.1057   6
   3  12   9 537.871 29.8498   3
  -3  12  -9 569.239 33.4037   4
   3 -12   9 578.691 30.6752   1
   3  12   9 526.737 29.2681   1
  -3  12 -10 176.795 19.5679   4
   3 -12  10 169.067 18.1409   1
   3  12  10 206.384 18.9990   1
   3 -12  10 186.628 20.8349   6
  -3  12 -11 1.52211 9.04405   4
  -3  12 -11-1.85409 6.94213   3
   3  12  11 3.93103 8.44492   1
   3 -12  11 6.62314 8.95359   1
   3 -12  11 15.8038 8.96642   6
  -3  12 -12 396.632 29.4359   4
  -3  12 -12 411.933 23.0058   3
   3 -12  12 419.279 31.0881   6
   3  12  12 437.978 21.9664   6
  -3  12 -13 38.9860 12.4297   4
   3  12  13 36.7523 8.04360   6
   3 -12  13 50.0997 14.8688   6
  -3  12 -13 60.1881 9.87197   3
  -3  12 -14 397.864 30.7599   4
  -3  12 -17 12.5625 12.4057   1
   3  13 -18 383.959 31.9267   2
   3 -13 -17 138.304 21.5798   2
   3  13 -17 108.842 18.4198   2
   3 -13 -16 97.0970 17.4990   2
   3  13 -16 112.302 17.3216   2
   3  13 -15 234.384 22.7929   4
   3 -13 -15 280.229 26.4109   2
   3  13 -15 247.426 23.7242   2
   3  13 -14 2.94438 10.0631   4
   3 -13 -14 1.65234 10.5146   2
   3  13 -14 5.78112 9.07842   2
   3  13 -13 60.7309 13.4931   4
   3 -13 -13 60.0096 13.5569   2
   3  13 -13 59.3372 12.2133   2
   3  13 -12 389.880 29.5143   3
   3  13 -12 384.762 31.0341   6
   3  13 -12 346.510 25.9443   4
   3  13 -11 111.877 17.1077   3
   3  13 -11 104.492 14.7260   4
   3  13 -10 451.429 28.3802   4
   3  13 -10 452.139 31.1342   3
   3  13  -9 1585.34 54.2187   4
   3  13  -9 1527.11 58.6596   3
   3  13  -8 19.0681 8.67513   4
   3 -13  -8 7.32326 3.94765   6
   3  13  -8 15.3953 9.01445   3
   3 -13  -7 48.5583 6.76679   6
   3  13  -7 39.0992 9.64760   4
   3 -13  -6 0.51510 4.66529   6
   3 -13  -6-11.3789 11.5945   4
  -3  13   5 501.568 27.3130   2
   3 -13  -5 491.588 21.3734   6
   3 -13  -5 509.341 32.5665   4
  -3  13   4 294.725 20.4745   2
   3  13  -4 324.378 24.8355   3
   3 -13  -4 328.691 17.6204   6
   3 -13  -4 321.933 25.3637   4
  -3  13   3 863.344 35.8682   2
   3 -13  -3 814.932 41.4786   4
   3  13  -3 923.373 42.9102   3
   3 -13  -3 859.187 32.6448   6
   3 -13  -2 85.7780 10.6783   6
   3 -13  -2 116.522 14.1565   4
   3  13  -2 112.694 15.8955   3
  -3  13   2 109.409 11.3105   2
   3 -13  -2 116.168 11.6312   1
   3  13  -2 88.6699 9.82554   1
   3 -13  -1 2745.66 79.1920   6
  -3  13   1 2664.02 78.7498   2
   3 -13  -1 2703.52 89.2406   4
   3  13  -1 2849.40 89.8219   3
   3  13  -1 2581.03 77.0890   1
   3 -13  -1 2684.20 77.5827   1
   3 -13   0-4.50724 6.23202   6
  -3  13   0-0.81033 5.60255   2
   3 -13   0 15.5391 7.05365   4
   3  13   0-1.37578 8.64320   3
   3  13   0 17.9522 5.22798   1
   3 -13   0 15.2641 5.29187   1
   3 -13   1-2.88841 6.50934   6
  -3 -13  -1 2.00978 7.16915   4
   3 -13   1 7.14658 6.51503   4
   3  13   1 6.80801 8.09132   3
   3 -13   1 8.60054 5.00902   1
   3  13   1 16.9184 4.74290   1
  -3  13  -1 2.44340 5.87029   2
   3 -13   2 143.916 12.8738   1
   3  13   2 159.116 13.1022   1
   3 -13   2 149.726 14.9473   6
  -3 -13  -2 168.754 14.8563   4
   3  13   2 134.160 16.1077   3
  -3  13  -2 137.106 12.7788   2
   3 -13   3 25.0295 9.22695   6
  -3 -13  -3 35.5423 8.36006   4
   3 -13   3 21.7749 6.97467   1
   3  13   3 21.5148 6.76648   1
   3  13   3 16.2265 8.94594   3
  -3  13  -3 24.0724 6.81346   2
   3 -13   4 152.033 16.5763   6
   3  13   4 159.667 17.7593   3
   3  13   4 170.788 14.3328   1
   3 -13   4 158.725 13.9453   1
  -3 -13  -4 189.734 16.5126   4
   3 -13   5 1604.15 58.5077   6
  -3 -13  -5 1614.69 55.5316   4
   3  13   5 1542.32 59.4193   3
   3 -13   5 1537.41 52.2117   1
   3  13   5 1550.55 52.5662   1
  -3 -13  -6 110.974 12.4923   4
   3  13   6 93.3790 14.3898   3
   3  13   6 76.4232 11.0888   1
   3 -13   6 72.2251 10.9338   1
   3 -13   6 106.701 15.2989   6
   3 -13   7 1392.82 55.2813   6
  -3 -13  -7 1386.21 51.3183   4
   3  13   7 1388.55 54.5261   3
   3 -13   7 1332.68 49.4381   1
   3  13   7 1394.88 49.8305   1
   3 -13   8 11.3455 8.55136   6
   3  13   8 20.6447 8.91923   3
  -3  13  -8 5.90664 9.27732   4
   3 -13   8-1.06250 7.34549   1
   3  13   8 14.7543 7.44250   1
  -3  13  -9 15.0786 9.22337   4
   3  13   9 21.7524 9.58554   3
   3 -13   9 10.2594 8.69719   1
   3  13   9 10.1415 7.17665   1
   3 -13   9 10.4556 10.7660   6
   3 -13  10 277.603 21.8898   1
   3  13  10 272.210 21.9850   1
  -3  13 -10 271.338 24.1027   4
   3 -13  10 293.755 25.5227   6
  -3  13 -11 106.469 17.1700   4
   3 -13  11 134.156 19.1025   6
  -3  13 -11 102.242 13.0082   3
  -3  13 -12 98.1434 16.3762   4
   3 -13  12 113.434 18.4002   6
  -3  13 -12 82.5197 12.2477   3
   3  13  12 85.7240 10.2880   6
  -3  13 -13 908.807 37.6309   3
   3 -14 -17 275.638 27.5155   1
   3 -14 -17 267.506 27.7021   2
   3 -14 -16 386.647 31.2889   1
   3 -14 -16 454.317 34.3775   2
   3  14 -16 442.770 31.4207   2
   3 -14 -15 35.7281 13.4622   2
   3  14 -15 47.1571 12.6886   2
   3  14 -14 65.1002 14.0520   4
   3 -14 -14 68.8398 15.8048   2
   3  14 -14 66.2195 13.1998   2
   3  14 -13 95.7972 15.7355   4
   3  14 -12 817.251 40.9913   4
   3  14 -11 657.255 38.3438   3
   3  14 -11 577.349 37.6643   6
   3  14 -11 578.844 33.9827   4
   3  14 -10 23.3221 10.7430   3
   3  14 -10 13.3855 9.35922   4
   3  14  -9 161.487 19.9212   3
   3  14  -9 159.111 17.5602   4
   3  14  -8 145.694 17.1692   4
   3  14  -8 176.021 20.1191   3
   3 -14  -7 62.6715 7.07222   6
   3 -14  -7 41.8157 14.5310   4
   3 -14  -6 632.142 37.1764   4
   3 -14  -6 476.176 20.1633   6
   3 -14  -5 543.225 34.2418   4
   3 -14  -5 477.167 21.2528   6
   3 -14  -4 2237.07 79.8400   4
  -3  14   4 2148.43 68.0935   2
   3  14  -4 2282.97 79.1374   3
   3 -14  -4 2072.88 62.6286   6
   3 -14  -3 425.003 21.4401   6
  -3  14   3 414.627 23.3421   2
   3 -14  -3 479.606 31.4338   4
   3  14  -3 421.726 29.5397   3
   3  14  -3 422.451 21.9920   1
   3 -14  -3 438.487 22.4709   1
   3  14  -2 4.53312 8.71003   3
   3 -14  -2 6.39950 6.41855   6
   3 -14  -2-1.53422 10.2515   4
   3 -14  -2-9.89330 7.68846   1
   3  14  -2-3.63811 7.56131   1
  -3  14   2-6.84200 8.40435   2
   3 -14  -1 55.4898 9.44199   6
   3 -14  -1 83.5530 14.7439   4
   3  14  -1 58.1811 12.6040   3
  -3  14   1 64.8929 10.0396   2
   3  14  -1 50.5188 8.70931   1
   3 -14  -1 51.7603 8.60149   1
   3 -14   0 166.519 15.2040   6
  -3  14   0 132.172 12.6476   2
   3 -14   0 146.552 18.4087   4
   3  14   0 184.989 19.4962   3
   3 -14   0 111.222 10.9609   1
   3  14   0 121.986 11.6746   1
   3  14   1 118.789 16.3443   3
   3 -14   1 96.2337 12.7427   6
  -3 -14  -1 105.373 12.4393   4
   3 -14   1 123.942 16.8226   4
   3  14   1 94.4819 10.2272   1
   3 -14   1 114.226 10.8586   1
  -3  14  -1 104.958 11.1628   2
   3  14   2 1544.64 50.2097   1
   3 -14   2 1573.77 50.2850   1
  -3 -14  -2 1546.98 55.8744   4
   3 -14   2 1557.72 55.9496   6
   3  14   2 1673.59 63.0793   3
  -3  14  -2 1616.49 51.6844   2
   3  14   3 402.713 21.1384   1
   3 -14   3 388.860 20.7488   1
  -3 -14  -3 447.415 25.4627   4
   3 -14   3 438.041 26.1565   6
   3  14   3 462.812 29.9743   3
  -3  14  -3 435.547 22.0173   2
   3 -14   4 409.430 21.5263   1
   3  14   4 396.231 21.4226   1
  -3 -14  -4 403.626 24.5589   4
   3 -14   4 423.164 26.2526   6
   3  14   4 434.067 29.1080   3
  -3  14  -4 423.598 21.7575   2
   3 -14   5 406.040 26.5948   6
  -3 -14  -5 378.831 23.7853   4
   3  14   5 427.174 28.2899   3
   3 -14   5 365.353 20.9150   1
   3  14   5 375.544 21.0774   1
  -3 -14  -6 19.3948 7.54337   4
   3  14   6 14.1633 9.02059   3
   3 -14   6 16.0567 9.64822   6
   3  14   6 13.2744 7.16733   1
   3 -14   6 19.5784 7.37661   1
  -3 -14  -7 26.8292 9.21979   4
   3  14   7 18.2586 9.50557   3
   3 -14   7 25.7486 8.25985   1
   3  14   7 14.3224 7.16624   1
   3 -14   7 26.6881 10.6257   6
  -3 -14  -8 821.875 37.7036   4
   3  14   8 785.433 39.4942   3
   3 -14   8 775.942 35.0519   1
   3  14   8 704.510 33.7365   1
   3 -14   8 812.428 41.2338   6
   3  14   9 64.7294 12.2103   1
   3 -14   9 55.7384 14.0802   6
  -3  14  -9 50.6734 13.7507   4
   3  14   9 50.9563 12.0575   3
  -3  14 -10 2403.93 85.9761   4
   3 -14  10 2427.24 85.7958   6
  -3  14 -11 92.5963 16.9713   4
  -3  14 -11 114.070 13.9744   3
  -3  14 -12 6.51993 8.21284   3
   3 -15 -17 23.3158 13.3151   2
   3 -15 -16 357.759 30.3641   2
   3 -15 -15 1.45682 10.3910   1
   3  15 -13 302.233 25.5440   4
   3  15 -12 193.801 20.7184   4
   3  15 -11 11.4762 9.80890   4
   3  15 -10 115.036 18.0504   6
   3  15 -10 175.878 18.9810   4
   3  15  -9 144.083 19.8352   3
   3  15  -9 154.163 18.2308   4
   3 -15  -8 441.789 35.0815   4
   3  15  -8 385.278 30.2316   3
   3 -15  -7 181.066 23.0118   4
   3 -15  -6 506.076 35.0988   4
   3 -15  -6 402.550 18.1855   6
   3 -15  -5 1546.13 65.0608   4
   3 -15  -5 1479.67 46.0727   6
   3 -15  -4 154.051 20.1818   4
   3  15  -4 163.021 19.8679   3
   3 -15  -4 150.675 12.6984   6
   3  15  -4 157.177 13.1088   1
   3 -15  -4 137.474 12.7056   1
   3 -15  -3 6.02871 6.37844   6
   3 -15  -3-1.30979 7.37063   1
   3  15  -3 0.68023 6.27653   1
   3  15  -3 1.62607 8.76737   3
  -3  15   3-11.7541 9.17404   2
  -3 -15   2 244.143 17.2531   2
  -3  15   2 229.764 15.9323   2
   3 -15  -2 231.654 14.4340   1
   3  15  -2 219.858 14.5419   1
   3 -15  -2 235.610 22.9357   4
   3  15  -2 199.791 21.3478   3
   3 -15  -2 227.403 16.5602   6
  -3  15   1 532.001 24.4130   2
  -3 -15   1 489.071 25.5067   2
   3 -15  -1 479.092 21.5321   1
   3  15  -1 472.088 21.7619   1
   3 -15  -1 514.826 33.0911   4
   3  15  -1 588.480 34.9613   3
   3 -15  -1 508.662 25.8734   6
   3 -15   0 639.406 30.3986   6
  -3  15   0 674.241 27.4484   2
  -3 -15   0 609.094 28.2156   2
   3  15   0 579.245 24.7339   1
   3 -15   0 613.655 36.5590   4
   3  15   0 681.648 38.5491   3
   3 -15   0 592.254 24.6406   1
  -3  15  -1 576.246 25.6324   2
  -3 -15  -1 568.177 26.5742   2
   3 -15   1 656.172 31.2800   6
   3 -15   1 639.071 37.1541   4
   3  15   1 612.308 36.1564   3
   3 -15   1 596.729 24.4620   1
   3  15   1 603.236 24.9465   1
  -3  15  -2 216.222 14.8285   2
  -3 -15  -2 236.300 18.7533   4
   3 -15   2 202.030 18.4819   6
   3  15   2 219.188 22.6753   3
   3 -15   2 188.465 13.4074   1
   3  15   2 181.124 13.4349   1
   3  15   3 1124.79 40.0420   1
   3 -15   3 1170.80 40.1261   1
   3 -15   3 1331.39 49.8304   6
  -3 -15  -3 1178.45 47.7993   4
   3  15   3 1263.35 54.1771   3
  -3  15  -3 1224.02 41.7335   2
   3 -15   4 13.7473 9.00653   6
  -3  15  -4 6.78955 5.85721   2
  -3 -15  -4 15.7209 8.44970   4
   3 -15   4 7.09910 5.92399   1
   3  15   4 2.90432 6.01344   1
   3  15   4 13.8916 9.03673   3
   3 -15   5-1.31931 8.50380   6
  -3 -15  -5 8.45672 8.16720   4
   3  15   5 10.7065 8.67884   3
   3 -15   5 7.72787 6.35069   1
   3  15   5 9.45635 5.84807   1
  -3  15  -5 7.67953 5.80565   2
  -3 -15  -6 90.8464 13.7836   4
   3 -15   6 100.290 15.9096   6
   3 -15   6 104.004 11.6342   1
   3  15   6 92.3536 11.4263   1
   3  15   6 130.304 17.0694   3
  -3 -15  -7 85.0228 14.2561   4
   3 -15   7 77.8345 15.4502   6
   3  15   7 94.6119 16.0880   3
   3  15   7 81.5286 11.7373   1
   3 -15   7 78.9805 11.8892   1
  -3 -15  -8 176.191 18.1525   4
   3 -15   8 206.262 21.9046   6
   3  15   8 209.482 22.0749   3
  -3 -15  -9 587.424 33.3961   4
   3 -15   9 644.490 37.5742   6
   3  15   9 553.183 34.3048   3
   3 -15  10 23.4472 12.6673   6
  -3  15 -11 163.777 17.2709   3
   3  16 -12 154.373 19.3363   4
   3  16 -11 7.51772 9.93014   4
   3  16 -10 224.202 21.9693   4
   3  16  -9-3.22967 10.7900   6
   3  16  -8 1363.94 59.1927   6
   3 -16  -8 1518.13 68.7931   4
   3 -16  -7 54.8014 16.5925   4
   3 -16  -6 15.6337 13.2132   4
   3 -16  -5 17.1840 7.01328   1
   3  16  -5 21.6506 7.01132   1
   3 -16  -5 22.6123 13.1710   4
   3  16  -4 16.1290 6.26853   1
   3 -16  -4 17.0273 6.48202   1
   3  16  -4 17.4229 11.5112   3
   3 -16  -4 12.7437 12.7228   4
   3 -16  -3 23.1628 11.3450   4
   3 -16  -3 12.3505 7.13373   6
   3  16  -3 18.9855 11.8042   3
   3 -16  -3 21.0830 5.94574   1
   3  16  -3 16.0699 5.80326   1
   3 -16  -2 1576.56 63.3282   4
   3 -16  -2 1429.27 47.8392   6
   3  16  -2 1582.27 62.5484   3
   3 -16  -2 1313.20 40.5608   1
   3  16  -2 1179.04 40.1965   1
   3 -16  -1 0.93347 7.84339   6
   3 -16  -1 3.88495 5.42045   1
   3  16  -1-5.33261 6.38305   1
   3 -16  -1 17.2200 9.44887   4
   3  16  -1-1.69411 11.1870   3
  -3  16   1 0.67254 7.08861   2
  -3 -16   1-10.4944 9.78141   2
   3 -16   0 332.800 21.6147   6
  -3  16   0 287.110 17.0549   2
  -3 -16   0 253.504 17.5497   2
   3 -16   0 335.924 27.5875   4
   3  16   0 343.070 27.0458   3
   3  16   0 281.678 15.3243   1
   3 -16   0 285.330 14.6885   1
   3 -16   1 24.9836 9.13640   6
  -3  16  -1 31.0443 6.98650   2
   3  16   1 6.59101 5.61178   1
   3 -16   1 13.7976 11.6644   4
   3 -16   1 24.5438 5.58291   1
  -3 -16  -1 10.0923 8.25549   2
   3  16   1 18.3792 11.4281   3
  -3 -16  -2-4.27046 6.60718   2
   3 -16   2 4.63506 8.43203   6
  -3 -16  -2-5.13608 9.79078   4
   3  16   2 0.57417 5.55032   1
   3 -16   2 0.53268 5.74423   1
   3  16   2-8.33239 10.1883   3
  -3  16  -3 1.31942 5.03056   2
  -3 -16  -3-3.54831 5.64785   2
  -3 -16  -3-14.0902 11.3785   4
   3 -16   3-1.23171 8.78539   6
   3  16   3-1.65740 8.44410   3
   3  16   3-0.61457 5.27678   1
   3 -16   3-2.32258 5.15806   1
   3 -16   4 330.911 18.6304   1
   3  16   4 385.040 19.8836   1
   3 -16   4 434.416 27.9914   6
  -3 -16  -4 376.773 26.1565   4
   3  16   4 410.933 29.9603   3
  -3  16  -4 397.818 19.9964   2
  -3  16  -5 23.6974 6.87813   2
  -3 -16  -5 1.30269 10.4610   4
   3 -16   5 20.5739 10.9243   6
   3  16   5 8.13288 10.3597   3
   3  16   5 32.7483 7.85990   1
   3 -16   6 1586.47 60.3265   6
   3  16   6 1475.24 61.3287   3
  -3  16  -6 1359.21 47.0143   2
  -3 -16  -6 1508.54 57.3183   4
   3 -16   7 43.9542 13.2959   6
   3  16   7 36.7135 13.8114   3
  -3 -16  -7 2.66377 11.3670   4
   3 -16   8 49.1917 13.5621   6
   3  16   8 45.6289 11.7112   3
  -3 -16  -8 33.8413 11.2467   4
   3 -16   9 6.64299 10.8355   6
   3  16   9-1.54242 8.75056   3
   3  16  10 6.05817 9.13044   3
  -3 -16 -10-11.3443 11.3776   4
  -3 -16 -11-13.0832 11.1837   4
  -3  16 -11 2.61545 8.10626   3
   3  17  -8 226.298 23.0069   6
   3  17  -7 39.4787 13.0198   6
   3  17  -6 436.709 29.7622   6
   3 -17  -6 444.499 20.5635   1
   3 -17  -5 811.926 28.5642   1
   3 -17  -4 779.994 44.5765   4
   3 -17  -4 669.920 23.9501   1
   3 -17  -3 3.80793 14.3883   4
   3 -17  -3 6.65793 5.27840   1
   3 -17  -2 159.778 22.8620   4
   3 -17  -2 126.661 8.90162   1
   3  17  -1 421.364 32.6088   3
   3 -17  -1 417.140 32.5970   4
   3 -17  -1 345.657 14.4175   1
   3 -17   0 136.549 8.99967   1
   3 -17   0 162.579 22.1253   4
   3 -17   1 139.993 21.1824   4
   3  17   1 159.284 21.0996   3
  -3 -17  -1 114.606 10.7618   2
   3 -17   1 130.183 9.08463   1
  -3 -17  -2 222.466 21.4777   4
   3  17   2 280.779 26.1007   3
   3 -17   2 237.864 20.2338   6
  -3 -17  -3 533.027 31.9346   4
   3  17   3 593.398 37.0596   3
   3 -17   3 593.407 32.1651   6
  -3 -17  -4 93.2693 16.0855   4
  -3 -17  -4 103.960 10.7519   2
   3 -17   4 137.080 18.0432   6
   3  17   4 155.088 20.8695   3
  -3 -17  -5 43.0944 12.1504   4
  -3 -17  -5 46.5976 8.12474   2
   3 -17   5 46.8256 12.6507   6
   3  17   5 55.1197 14.4068   3
   3 -17   6 114.727 17.2345   6
   3  17   6 146.645 19.0294   3
  -3 -17  -6 132.750 16.9310   4
   3  17   7 133.909 18.5514   3
  -3 -17  -7 136.862 17.5877   4
   3  17   8 29.5888 11.8634   3
  -3 -17  -8 30.0705 11.6924   4
   3  17   9 208.240 22.6325   3
  -3 -17  -9 230.104 22.1830   4
  -3 -17 -10 1.48072 14.3963   4
   3  17  10 30.0408 12.0603   3
  -3 -17 -11 9.11285 11.9930   4
   3  17  11 23.2791 12.1519   3
   3  18  -6 646.271 36.2006   6
   3  18  -5 78.5636 14.4819   6
   3  18  -4 650.898 34.8333   6
   3  18  -3 32.0994 11.4518   6
  -3 -18  -3 23.4272 11.5689   4
  -3 -18  -4 79.9472 15.0702   4
  -3 -18  -5 152.480 19.2167   4
  -3 -18  -6-13.3778 12.3083   4
  -3 -18  -7-2.98494 12.3547   4
  -3 -18  -8 489.923 33.1348   4
  -3 -18  -9-9.18498 14.7993   4
   3  19  -5 220.557 20.9689   6
   3  19  -4 58.1655 12.6173   6
   3  19  -3 71.9772 13.4357   6
   3  19  -2 85.7987 13.6067   6
   3  19  -1 704.461 34.8915   6
  -3 -19  -3 21.5961 12.7789   4
  -3 -19  -4 16.9984 14.3503   4
  -3 -19  -5 396.461 30.4538   4
  -3 -19  -6-9.34580 14.5479   4
  -3 -19  -7 301.220 27.3853   4
   4   0 -21-4.34776 11.2467   5
   4   0 -20 15.5016 11.2188   5
   4   0 -20 10.2994 10.9184   6
   4   0 -19 4.00414 10.0864   5
  -4   0  18 823.317 45.5986   3
   4   0 -18 916.686 42.2161   5
  -4   0  17 8.46635 10.2103   3
   4   0 -17 13.5031 10.7587   2
  -4   0  16 2204.86 80.1763   3
   4   0 -16 2079.90 85.6407   2
   4   0 -15 12.3316 9.82666   2
   4   0 -14 206.831 23.4131   2
  -4   0  13 2.03916 10.5947   2
   4   0 -13-1.83875 8.58583   2
  -4   0  12 92.2728 14.2065   3
  -4   0  12 89.3619 15.5760   2
   4   0 -12 67.1978 14.6013   2
  -4   0  11 11.2612 7.98729   3
  -4   0  11 7.32334 9.87249   2
   4   0 -11 1.63878 7.65354   2
  -4   0  10 3406.10 107.054   3
   4   0 -10 3453.48 111.478   2
  -4   0  10 3674.07 115.673   2
  -4   0   9 9.02126 6.29776   3
  -4   0   9 1.63783 8.34432   2
   4   0  -9-4.48918 8.62525   2
  -4   0   8 1706.48 66.4379   2
  -4   0   8 1714.31 62.0529   3
  -4   0   7 10.5068 6.18836   3
  -4   0   7 17.2654 7.62373   2
  -4   0   6 845.859 41.3734   2
  -4   0   6 933.559 39.7417   3
  -4   0   5 6.25307 4.98297   3
  -4   0   5 6.53142 6.24476   2
  -4   0   4 1696.40 57.4993   3
  -4   0   4 1632.80 61.6126   2
  -4   0   3 7.62332 5.79009   2
  -4   0   3 6.42325 5.98720   3
   4   0  -3 0.98111 2.80616   4
  -4   0   2 9233.86 246.388   2
  -4   0   2 9865.84 239.742   3
  -4   0   1 6.37293 4.73589   3
  -4   0   1 8.21777 5.21674   2
  -4   0   0 109.370 10.4500   3
  -4   0  -1 4.70315 3.93423   3
   4   0   2 1365.02 55.2809   1
  -4   0  -2 1526.69 46.4563   3
   4   0   3 7.65767 7.12287   1
  -4   0  -3-1.69508 3.94699   3
  -4   0  -4 849.166 29.1249   3
   4   0   4 812.360 39.3198   1
  -4   0  -5-1.06729 3.14001   4
  -4   0  -5 8.69081 3.54276   3
   4   0   5 1.31406 6.82764   1
  -4   0  -6 2359.09 59.7804   3
   4   0   6 2258.08 77.8395   1
  -4   0  -6 2170.24 61.3918   4
   4   0   7 6.80292 8.08526   1
   4   0   8 250.736 21.9500   1
   4   0   9-7.49838 8.50973   1
   4   0  10 296.613 22.4623   6
   4   0  10 335.890 26.2499   1
   4   0  11 7.76060 7.45581   6
   4   0  11-1.61633 9.31689   1
   4   0  12 420.139 30.8460   1
   4   0  12 446.747 28.1268   6
   4   0  13 1.73663 10.1654   1
   4   0  13 4.12118 8.85302   6
   4   0  14 227.021 21.4405   6
   4   0  14 258.983 25.8288   1
  -4   0 -14 241.940 27.2529   1
   4   0  15 1.89983 10.9510   1
   4   0  15 7.25150 9.11007   6
  -4   0 -15 2.10876 11.3703   1
   4   0  16 245.059 22.8909   6
  -4   0 -16 224.461 26.4120   1
   4   0  16 207.988 24.7493   1
   4   0  17 4.57971 10.0812   6
   4   0  18 63.0032 14.3376   6
   4  -1 -22 28.0611 12.8031   5
   4  -1 -21 463.277 32.0350   6
   4   1 -21 573.857 35.6124   5
   4  -1 -21 566.434 33.8849   5
   4   1 -20 193.161 21.3274   6
   4  -1 -20 177.316 19.8071   6
   4   1 -20 228.255 22.7759   5
   4  -1 -20 240.301 21.9606   5
   4  -1 -19 327.502 25.2537   5
   4   1 -19 388.012 28.1969   5
   4  -1 -18 256.314 21.0787   5
  -4  -1  18 197.916 22.5869   3
  -4   1  18 208.690 22.9885   3
   4  -1 -17 699.037 34.5126   5
   4   1 -17 630.996 43.1920   2
  -4  -1  17 633.779 38.7551   3
  -4   1  17 632.114 38.5909   3
   4   1 -16 193.543 24.4210   2
  -4  -1  16 194.261 21.9401   3
  -4   1  16 245.855 23.0087   3
   4   1 -15 14.2582 10.5879   2
   4   1 -14 594.145 39.1728   2
   4   1 -13 2011.07 78.4199   2
  -4   1  13 1957.26 79.8863   2
  -4   1  12 378.781 30.3968   2
   4   1 -12 337.400 27.5677   2
  -4   1  12 428.523 28.0872   3
  -4  -1  12 396.398 27.5337   3
  -4   1  11 241.683 23.8431   2
   4   1 -11 223.434 21.8097   2
  -4   1  11 194.194 18.8451   3
  -4  -1  11 234.888 20.7077   3
  -4   1  10 351.425 27.9750   2
   4   1 -10 398.722 28.2104   2
  -4   1  10 371.551 25.5533   3
  -4  -1  10 338.851 24.6893   3
  -4   1   9 1058.10 49.9383   2
  -4   1   9 998.470 44.1341   3
  -4  -1   9 1002.47 44.8046   3
  -4   1   8 712.502 39.3069   2
  -4  -1   8 776.248 37.1172   3
  -4   1   8 756.145 36.4016   3
  -4   1   7 107.894 14.9919   2
  -4  -1   7 123.704 14.3237   3
  -4   1   7 131.296 14.0842   3
  -4   1   6 1851.46 68.5234   2
  -4  -1   6 1927.27 65.5494   3
  -4   1   6 1943.19 65.5449   3
  -4  -1   5 2314.02 73.0553   3
  -4   1   5 2370.11 73.5008   3
  -4   1   4 1096.58 47.7075   2
  -4  -1   4 1181.00 44.7113   3
  -4   1   4 1208.73 44.9911   3
   4   1  -3 520.439 14.9901   4
   4  -1  -3 519.981 18.9405   4
  -4   1   3 598.799 31.6225   2
  -4  -1   3 619.438 27.9289   3
  -4   1   3 566.274 27.2144   3
   4  -1  -2 2314.09 61.0735   4
  -4   1   2 2442.01 79.1833   2
  -4  -1   2 2495.13 72.9671   3
  -4   1   2 2530.22 73.4053   3
  -4   1   1 556.327 30.2465   2
  -4  -1   1 560.032 26.0302   3
  -4   1   1 638.530 27.4485   3
  -4  -1   0 834.382 32.1483   3
  -4   1   0 797.077 31.6415   3
  -4   1  -1 795.292 30.6346   3
  -4  -1  -1 813.742 30.9077   3
  -4  -1  -2 900.985 32.3547   3
  -4   1  -2 899.721 32.0054   3
   4   1   2 824.085 39.9384   1
  -4   1  -3 94.6409 8.36198   3
  -4  -1  -3 89.7705 8.58958   3
   4   1   3 93.0257 13.0917   1
  -4   1  -4 2823.37 75.6488   3
  -4  -1  -4 2848.29 76.3592   3
   4   1   4 2771.59 90.1255   1
  -4  -1  -5 1269.38 37.5398   3
  -4   1  -5 1269.58 37.1164   3
  -4  -1  -5 1195.75 34.1808   4
  -4   1  -5 1176.78 36.7571   4
   4   1   5 1172.88 49.9104   1
  -4   1  -6 1160.96 33.2883   3
   4   1   6 1092.82 47.8780   1
  -4   1  -6 1110.08 36.1146   4
   4   1   7 4.07444 7.45244   1
  -4   1  -7 0.58295 4.24208   4
   4   1   8 972.888 45.2382   1
   4   1   9 1270.02 53.6449   1
   4  -1   9 1198.72 49.3072   6
   4   1  10 1270.99 54.9044   1
   4   1  10 1228.75 50.2202   6
   4  -1  10 1292.41 51.3102   6
   4   1  11 321.285 26.1164   1
   4  -1  11 254.803 21.3756   5
   4  -1  11 277.661 22.4042   6
   4   1  11 275.012 21.9461   6
   4   1  12 1431.41 60.6939   1
   4  -1  12 1348.05 54.5514   5
   4   1  12 1425.74 55.2130   6
   4  -1  12 1418.42 55.9506   6
   4  -1  13 761.922 38.4339   6
   4   1  13 684.693 36.1596   6
   4   1  13 717.153 40.9521   1
   4  -1  14 263.356 22.8512   6
   4   1  14 271.712 22.5410   6
   4   1  14 219.009 24.4684   1
  -4   1 -14 263.080 27.9717   1
   4  -1  15 176.442 19.8900   6
   4   1  15 179.531 19.0580   6
   4   1  15 160.928 19.7449   5
   4   1  15 217.180 24.5876   1
  -4   1 -15 169.975 23.6808   1
   4   1  16 441.162 31.0315   5
   4   1  16 430.757 29.5148   6
   4  -1  16 419.375 29.8569   6
  -4   1 -16 403.882 35.8826   1
   4   1  16 470.108 35.8648   1
   4  -1  17 179.049 21.3641   6
   4   1  17 196.324 21.3807   6
   4   1  18 454.401 31.4113   6
   4  -2 -22 136.056 18.2636   6
   4  -2 -22 112.793 17.4060   5
   4  -2 -21 82.4100 14.6348   6
   4  -2 -21 60.5134 14.0485   5
   4  -2 -20 1733.06 66.1756   6
   4  -2 -20 1790.71 64.6834   5
   4   2 -20 1854.43 69.8508   5
   4  -2 -19 7.06398 8.97782   5
   4   2 -19 1.44090 10.0660   5
   4  -2 -18 191.834 18.2881   5
  -4  -2  18 175.262 21.4211   3
  -4   2  18 157.582 20.7462   3
   4   2 -17 4.40781 11.6788   2
   4  -2 -17 16.2203 8.89651   5
  -4   2  17 31.9317 11.2397   3
  -4  -2  17 36.2319 11.6714   3
   4   2 -16 2.11200 11.1822   2
   4  -2 -16-4.18035 8.51911   5
  -4   2  16 6.53783 8.65381   3
  -4  -2  16 1.68190 11.8733   3
   4   2 -15 343.469 30.6457   2
   4   2 -14 1410.09 63.7004   2
   4   2 -13 640.875 39.4276   2
  -4  -2  12 808.884 40.9543   3
  -4   2  12 782.899 40.0810   3
   4   2 -12 726.310 41.3430   2
  -4   2  12 820.936 45.6144   2
  -4   2  11 37.3385 9.47185   3
  -4  -2  11 22.8072 8.97390   3
  -4   2  11 14.6343 10.8854   2
   4   2 -11 29.0706 10.9326   2
  -4   2  10 83.9302 12.7292   3
  -4  -2  10 82.0201 13.2021   3
  -4   2  10 69.4238 14.4905   2
   4   2 -10 93.7023 14.3840   2
  -4   2   9 70.3125 11.3175   3
  -4  -2   9 62.6786 11.9322   3
  -4   2   9 76.8532 13.8308   2
  -4   2   8 89.3984 12.4519   3
  -4  -2   8 111.798 13.8366   3
  -4  -2   7 324.989 22.1824   3
  -4   2   7 305.527 21.4430   3
  -4   2   6 3917.81 120.389   2
  -4   2   6 3994.62 116.259   3
  -4  -2   6 4181.52 116.994   3
  -4   2   5 198.991 18.2297   2
  -4   2   5 207.994 16.8579   3
  -4  -2   5 199.609 16.5399   3
  -4  -2   4 316.890 20.1040   3
  -4   2   4 303.324 20.2164   3
  -4   2   4 305.596 22.6112   2
  -4  -2   3 285.183 18.4522   3
  -4   2   3 284.809 18.9178   3
  -4   2   3 317.644 22.4342   2
   4  -2  -3 265.834 13.6075   4
  -4   2   2 606.780 27.9202   3
  -4  -2   2 626.185 27.8564   3
  -4   2   2 589.559 31.2456   2
   4  -2  -2 522.973 20.2666   4
  -4   2   1 35.0508 7.94717   2
  -4   2   1 37.8157 7.40442   3
  -4  -2   1 46.9910 7.57383   3
   4  -2  -1 37.5866 5.10641   4
  -4   2   0 1090.62 39.1474   3
  -4  -2   0 1080.12 39.0528   3
  -4   2  -1 436.717 21.1663   3
  -4  -2  -1 432.898 21.2425   3
   4   2   2 4337.19 127.371   1
  -4  -2  -2 4539.26 115.954   3
  -4   2  -2 4330.41 114.837   3
   4   2   3 349.606 24.0970   1
  -4  -2  -3 343.429 17.2858   3
  -4   2  -3 311.421 16.0817   3
  -4   2  -4 16.9119 4.79722   3
  -4  -2  -4 9.34649 4.56300   3
   4   2   4 24.3797 8.77678   1
  -4   2  -5 1398.68 41.0155   3
  -4   2  -5 1386.53 42.6647   4
  -4  -2  -5 1390.48 37.0838   4
   4   2   5 1376.70 54.9284   1
  -4   2  -6 1535.72 43.2833   3
  -4   2  -6 1618.05 47.9531   4
   4   2   6 1488.39 58.6782   1
  -4   2  -7 756.756 22.3957   3
   4   2   7 754.576 38.0721   1
  -4   2  -7 719.027 28.4655   4
   4  -2   8 581.516 31.2562   6
   4   2   8 596.667 33.7512   1
   4  -2   9 417.973 26.3268   6
   4   2   9 372.316 27.1441   1
   4  -2  10 1165.05 47.3151   5
   4  -2  10 1197.11 49.3198   6
   4   2  10 1163.77 52.4354   1
   4  -2  11 312.655 22.6582   5
   4   2  11 293.705 22.3960   6
   4  -2  11 278.823 22.4799   6
   4   2  11 288.885 25.1406   1
   4  -2  12 448.229 27.8870   5
   4   2  12 494.469 29.0613   6
   4  -2  12 479.352 29.7052   6
   4   2  12 438.465 31.2026   1
   4  -2  13 312.744 24.3210   5
   4   2  13 344.027 28.7850   1
   4   2  13 291.895 22.8614   6
   4  -2  13 314.397 24.7441   6
   4  -2  14 37.0102 11.1824   5
   4   2  14 42.9077 12.4691   5
   4   2  14 45.2544 14.4378   1
   4  -2  14 39.7563 12.3184   6
   4   2  14 39.1250 11.4595   6
  -4   2 -14 54.3666 14.9677   1
   4   2  15 1989.10 71.5025   5
   4  -2  15 1811.60 68.7019   5
   4   2  15 1907.78 76.1726   1
   4  -2  15 1789.88 68.8447   6
   4   2  15 1841.61 67.5264   6
  -4   2 -15 1749.33 76.6491   1
   4   2  16 421.799 30.8209   5
   4   2  16 438.322 34.8025   1
   4   2  16 454.713 29.8387   6
   4  -2  16 385.761 29.5796   6
  -4   2 -16 397.618 35.4405   1
   4   2  17 177.697 20.5899   6
   4  -2  17 255.036 24.3133   6
   4   2  18-1.49054 10.5224   6
   4  -3 -21 3.40035 10.4584   5
   4  -3 -21 1.29424 10.2999   6
   4  -3 -20 93.2239 14.2551   5
   4  -3 -20 103.206 16.0398   6
   4  -3 -19 29.7207 10.4557   5
   4  -3 -19 34.5393 11.6084   6
  -4  -3  18 88.4831 17.4868   3
   4  -3 -18 76.5298 12.4830   5
   4  -3 -17 1390.74 49.5963   5
  -4   3  17 1232.32 56.9907   3
  -4  -3  17 1319.59 59.1218   3
   4  -3 -17 1293.78 65.3205   2
   4   3 -17 1277.67 63.6305   2
  -4   3  16 9.76887 9.11526   3
  -4  -3  16 32.2289 12.2428   3
   4  -3 -16 68.5263 16.5674   2
   4   3 -16 56.3366 14.4377   2
   4  -3 -16 31.8935 9.19619   5
   4  -3 -15 612.246 40.6794   2
   4   3 -15 539.299 38.2455   2
   4  -3 -15 567.024 28.0702   5
   4  -3 -14 92.5915 17.0413   2
   4   3 -14 88.7956 17.2359   2
   4  -3 -13 260.395 25.0964   2
[truncated: 151,842 more chars]
