# Supplementary material for: Halogen Bonding in Sulphonamide Co-Crystals: X···π Preferred over X···O/N?
Source: Molecules. 2023 Aug 6;28(15):5910. doi: 10.3390/molecules28155910 (PMC10420850; doi:10.3390/molecules28155910)
Supplement: Supplementary file 1 [file molecules-28-05910-s001.zip › 3-AK-PM1_2zu1_final.cif]

data_ak-pm1_final
_audit_creation_date               2022-02-04
_audit_creation_method
;
Olex2 1.3
(compiled 2020.11.12 svn.r5f609507 for OlexSys, GUI svn.r6408)
;
_shelx_SHELXL_version_number       '2017/1'
_audit_contact_author_address      ?
_audit_contact_author_email        ?
_audit_contact_author_name         ''
_audit_contact_author_phone        ?
_publ_contact_author_id_orcid      ?
_publ_section_references
;
Bourhis, L.J., Dolomanov, O.V., Gildea, R.J., Howard, J.A.K., Puschmann, H.
 (2015). Acta Cryst. A71, 59-75.

Dolomanov, O.V., Bourhis, L.J., Gildea, R.J, Howard, J.A.K. & Puschmann, H.
 (2009), J. Appl. Cryst. 42, 339-341.

Sheldrick, G.M. (2008). Acta Cryst. A64, 112-122.
;
_chemical_name_common              ?
_chemical_name_systematic          ?
_chemical_formula_moiety           'C3 F2 I, C7 H9 N O2 S'
_chemical_formula_sum              'C10 H9 F2 I N O2 S'
_chemical_formula_weight           372.14
_chemical_melting_point            ?
loop_
  _atom_type_symbol
  _atom_type_description
  _atom_type_scat_dispersion_real
  _atom_type_scat_dispersion_imag
  _atom_type_scat_source
 'C' 'C' 0.0181 0.0091 'International Tables Vol C Tables 4.2.6.8 and 6.1.1.4'
 'H' 'H' 0.0000 0.0000 'International Tables Vol C Tables 4.2.6.8 and 6.1.1.4'
 'F' 'F' 0.0727 0.0534 'International Tables Vol C Tables 4.2.6.8 and 6.1.1.4'
 'I' 'I' -0.3257 6.8362 'International Tables Vol C Tables 4.2.6.8 and 6.1.1.4'
 'N' 'N' 0.0311 0.0180 'International Tables Vol C Tables 4.2.6.8 and 6.1.1.4'
 'O' 'O' 0.0492 0.0322 'International Tables Vol C Tables 4.2.6.8 and 6.1.1.4'
 'S' 'S' 0.3331 0.5567 'International Tables Vol C Tables 4.2.6.8 and 6.1.1.4'

_shelx_space_group_comment
;
The symmetry employed for this shelxl refinement is uniquely defined
by the following loop, which should always be used as a source of
symmetry information in preference to the above space-group names.
They are only intended as comments.
;
_space_group_crystal_system        'monoclinic'
_space_group_IT_number             14
_space_group_name_H-M_alt          'P 1 21/c 1'
_space_group_name_Hall             '-P 2ybc'
loop_
  _space_group_symop_operation_xyz
 'x, y, z'
 '-x, y+1/2, -z+1/2'
 '-x, -y, -z'
 'x, -y-1/2, z-1/2'

_cell_length_a                     11.4061(3)
_cell_length_b                     5.74650(10)
_cell_length_c                     18.4124(4)
_cell_angle_alpha                  90
_cell_angle_beta                   90.479(2)
_cell_angle_gamma                  90
_cell_volume                       1206.80(5)
_cell_formula_units_Z              4
_cell_measurement_reflns_used      5970
_cell_measurement_temperature      100.01(10)
_cell_measurement_theta_max        76.0710
_cell_measurement_theta_min        4.7750
_shelx_estimated_absorpt_T_max     0.397
_shelx_estimated_absorpt_T_min     0.172
_exptl_absorpt_coefficient_mu      22.656
_exptl_absorpt_correction_T_max    0.517
_exptl_absorpt_correction_T_min    0.222
_exptl_absorpt_correction_type     gaussian
_exptl_absorpt_process_details
;
CrysAlisPro 1.171.41.92a (Rigaku Oxford Diffraction, 2020)
Numerical absorption correction based on gaussian integration over
a multifaceted crystal model
Empirical absorption correction using spherical harmonics,
implemented in SCALE3 ABSPACK scaling algorithm.
;
_exptl_absorpt_special_details     ?
_exptl_crystal_colour              'clear colourless'
_exptl_crystal_colour_lustre       clear
_exptl_crystal_colour_primary      colourless
_exptl_crystal_density_diffrn      2.048
_exptl_crystal_density_meas        ?
_exptl_crystal_density_method      ?
_exptl_crystal_description         block
_exptl_crystal_F_000               716
loop_
  _exptl_crystal_face_index_h
  _exptl_crystal_face_index_k
  _exptl_crystal_face_index_l
  _exptl_crystal_face_perp_dist
 -2 1 -2 0.0285
 1 2 -2 0.0443
 1 0 0 0.0490
 -2 1 -1 0.0295
 1 1 -2 0.0393
 1 -1 1 0.0430
 -1 1 -1 0.0260
 0 0 -1 0.0250
 0 0 1 0.0267
 0 -1 2 0.0417
 1 0 2 0.0350
 -1 0 2 0.0366
 1 -1 -2 0.0336
 -2 -1 1 0.0522
 -2 1 2 0.0285
 -1 1 2 0.0362

_exptl_crystal_size_max            0.12
_exptl_crystal_size_mid            0.07
_exptl_crystal_size_min            0.05
_exptl_transmission_factor_max     ?
_exptl_transmission_factor_min     ?
_diffrn_reflns_av_R_equivalents    0.0386
_diffrn_reflns_av_unetI/netI       0.0328
_diffrn_reflns_Laue_measured_fraction_full  0.998
_diffrn_reflns_Laue_measured_fraction_max  0.898
_diffrn_reflns_limit_h_max         14
_diffrn_reflns_limit_h_min         -13
_diffrn_reflns_limit_k_max         6
_diffrn_reflns_limit_k_min         -4
_diffrn_reflns_limit_l_max         22
_diffrn_reflns_limit_l_min         -22
_diffrn_reflns_number              8322
_diffrn_reflns_point_group_measured_fraction_full  0.998
_diffrn_reflns_point_group_measured_fraction_max  0.898
_diffrn_reflns_theta_full          67.684
_diffrn_reflns_theta_max           76.849
_diffrn_reflns_theta_min           3.876
_diffrn_ambient_temperature        100.15
_diffrn_detector_area_resol_mean   10.0000
_diffrn_detector_type              HyPix
_diffrn_measured_fraction_theta_full  0.998
_diffrn_measured_fraction_theta_max  0.898
_diffrn_measurement_details
;
List of Runs (angles in degrees, time in seconds):

  # Type    Start    End  Width  t~exp~   \w     \q     \k     \f   Frames
--------------------------------------------------------------------------
  1  \w    128.00 155.00   0.50    1.27    --  109.96  36.00 -36.00   54
  2  \w    113.00 174.00   0.50    1.27    --  109.96  19.00 -90.00  122
  3  \w     53.00  85.00   0.50    0.32    --   51.23  36.00 -36.00   64
  4  \w    -19.00  13.00   0.50    0.32    --   51.23 -19.00  60.00   64
  5  \w    -14.00  13.00   0.50    0.32    --   51.23 -19.00-180.00   54
  6  \w    -16.00  10.00   0.50    0.32    --   51.23 -19.00  30.00   52
  7  \w    -16.00   9.00   0.50    0.32    --   51.23 -36.00 166.00   50
  8  \w   -119.00 -49.00   0.50    0.32    --  -51.23 -36.00 166.00  140
  9  \w   -161.00 -99.00   0.50    1.27    --  -90.00 -36.00 166.00  124
 10  \w   -103.00 -75.00   0.50    0.32    --  -51.23-125.00 120.00   56
 11  \w    -52.00 -25.00   0.50    1.27    --  -90.00 125.00  30.00   54
 12  \w    -82.00 -55.00   0.50    1.27    --  -90.00 125.00  30.00   54
 13  \w    -67.00 -28.00   0.50    1.27    --  -90.00  57.00 120.00   78
 14  \w    -70.00 -26.00   0.50    1.27    --  -90.00  57.00 150.00   88
 15  \w    -59.00 -34.00   0.50    1.27    --  -90.00  57.00  90.00   50
 16  \w    -66.00 -18.00   0.50    1.27    --  -90.00  57.00  60.00   96
 17  \w    -69.00 -19.00   0.50    1.27    --  -90.00  57.00  30.00  100
 18  \w    -60.00 -24.00   0.50    1.27    --  -90.00  57.00 -30.00   72
 19  \w    -65.00 -40.00   0.50    1.27    --  -90.00  57.00 -60.00   50
 20  \w    -67.00 -37.00   0.50    1.27    --  -90.00  57.00 -90.00   60
 21  \w    -66.00 -37.00   0.50    1.27    --  -90.00  57.00-120.00   58
 22  \w    -48.00 -20.00   0.50    1.27    --  -90.00  38.00-120.00   56
 23  \w    -44.00  11.00   0.50    0.32    --  -51.23  36.00 -36.00  110
 24  \w    -46.00 -21.00   0.50    1.27    --  -90.00  36.00 -36.00   50
 25  \w    -47.00 -20.00   0.50    1.27    --  -90.00  38.00  30.00   54
 26  \w    -48.00 -22.00   0.50    1.27    --  -90.00  38.00  60.00   52
 27  \w   -131.00 -89.00   0.50    1.27    --  -90.00   0.00  30.00   84
;
_diffrn_measurement_device         'four-circle diffractometer'
_diffrn_measurement_device_type    'XtaLAB Synergy, Dualflex, HyPix'
_diffrn_measurement_method         '\w scans'
_diffrn_radiation_type             CuK\a
_diffrn_radiation_wavelength       1.54184
_diffrn_source                     ?
_reflns_Friedel_coverage           0.000
_reflns_Friedel_fraction_full      .
_reflns_Friedel_fraction_max       .
_reflns_number_gt                  2119
_reflns_number_total               2285
_reflns_special_details
;
 Reflections were merged by SHELXL according to the crystal
 class for the calculation of statistics and refinement.
 
 _reflns_Friedel_fraction is defined as the number of unique
 Friedel pairs measured divided by the number that would be
 possible theoretically, ignoring centric projections and
 systematic absences.
;
_reflns_threshold_expression       'I > 2\s(I)'
_computing_cell_refinement         'CrysAlisPro 1.171.41.92a (Rigaku OD, 2020)'
_computing_data_collection         'CrysAlisPro 1.171.41.92a (Rigaku OD, 2020)'
_computing_data_reduction          'CrysAlisPro 1.171.41.92a (Rigaku OD, 2020)'
_computing_molecular_graphics      'Olex2 1.3 (Dolomanov et al., 2009)'
_computing_publication_material    'Olex2 1.3 (Dolomanov et al., 2009)'
_computing_structure_refinement    'XL  (Sheldrick, 2008)'
_computing_structure_solution      'olex2.solve 1.3 (Bourhis et al., 2015)'
_refine_diff_density_max           0.632
_refine_diff_density_min           -0.730
_refine_diff_density_rms           0.115
_refine_ls_extinction_coef         .
_refine_ls_extinction_method       none
_refine_ls_goodness_of_fit_ref     1.076
_refine_ls_hydrogen_treatment      refall
_refine_ls_matrix_type             full
_refine_ls_number_parameters       190
_refine_ls_number_reflns           2285
_refine_ls_number_restraints       0
_refine_ls_R_factor_all            0.0292
_refine_ls_R_factor_gt             0.0271
_refine_ls_restrained_S_all        1.076
_refine_ls_shift/su_max            0.001
_refine_ls_shift/su_mean           0.000
_refine_ls_structure_factor_coef   Fsqd
_refine_ls_weighting_details      
 'w=1/[\s^2^(Fo^2^)+(0.0480P)^2^+0.4645P] where P=(Fo^2^+2Fc^2^)/3'
_refine_ls_weighting_scheme        calc
_refine_ls_wR_factor_gt            0.0735
_refine_ls_wR_factor_ref           0.0749
_refine_special_details            ?
_olex2_refinement_description
;
;
_atom_sites_solution_hydrogens     difmap
_atom_sites_solution_primary       iterative
_atom_sites_solution_secondary     ?
loop_
  _atom_site_label
  _atom_site_type_symbol
  _atom_site_fract_x
  _atom_site_fract_y
  _atom_site_fract_z
  _atom_site_U_iso_or_equiv
  _atom_site_adp_type
  _atom_site_occupancy
  _atom_site_site_symmetry_order
  _atom_site_calc_flag
  _atom_site_refinement_flags_posn
  _atom_site_refinement_flags_adp
  _atom_site_refinement_flags_occupancy
  _atom_site_disorder_assembly
  _atom_site_disorder_group
 I1 I 0.77323(2) 0.39085(4) 0.46258(2) 0.02440(11) Uani 1 1 d . . . . .
 S1 S 0.52319(7) 0.77228(15) 0.39136(4) 0.02312(19) Uani 1 1 d . . . . .
 F2 F 0.87118(18) -0.0560(4) 0.37642(11) 0.0279(4) Uani 1 1 d . . . . .
 F1 F 0.95598(19) 0.3527(4) 0.59362(12) 0.0299(5) Uani 1 1 d . . . . .
 O1 O 0.5944(2) 0.7940(5) 0.45644(13) 0.0282(5) Uani 1 1 d . . . . .
 O2 O 0.4914(2) 0.5437(5) 0.36756(15) 0.0320(6) Uani 1 1 d . . . . .
 N1 N 0.4065(3) 0.9247(6) 0.40749(17) 0.0252(6) Uani 1 1 d . . . . .
 C9 C 0.9765(3) 0.1777(6) 0.54671(18) 0.0234(7) Uani 1 1 d . . . . .
 C2 C 0.3135(3) 0.9658(6) 0.35737(17) 0.0216(7) Uani 1 1 d . . . . .
 C8 C 0.9084(3) 0.1575(6) 0.48452(19) 0.0226(7) Uani 1 1 d . . . . .
 C5 C 0.1264(3) 1.0591(7) 0.2630(2) 0.0256(7) Uani 1 1 d . . . . .
 C6 C 0.1590(3) 1.2201(7) 0.3157(2) 0.0307(8) Uani 1 1 d . . . . .
 C3 C 0.2798(3) 0.8036(7) 0.3050(2) 0.0275(7) Uani 1 1 d . . . . .
 C10 C 0.9343(3) -0.0259(6) 0.43774(18) 0.0231(7) Uani 1 1 d . . . . .
 C7 C 0.2527(3) 1.1753(7) 0.3627(2) 0.0281(7) Uani 1 1 d . . . . .
 C4 C 0.1872(3) 0.8544(7) 0.2577(2) 0.0284(8) Uani 1 1 d . . . . .
 C1 C 0.5951(4) 0.9122(9) 0.3191(2) 0.0341(9) Uani 1 1 d . . . . .
 H5 H 0.064(4) 1.098(6) 0.231(3) 0.024(11) Uiso 1 1 d . . . . .
 H1A H 0.542(4) 0.919(7) 0.280(2) 0.025(11) Uiso 1 1 d . . . . .
 H7 H 0.282(3) 1.288(8) 0.398(2) 0.029(10) Uiso 1 1 d . . . . .
 H4 H 0.161(3) 0.741(7) 0.216(2) 0.029(10) Uiso 1 1 d . . . . .
 H6 H 0.119(4) 1.362(7) 0.319(3) 0.030(11) Uiso 1 1 d . . . . .
 H3 H 0.323(5) 0.632(9) 0.304(3) 0.058(17) Uiso 1 1 d . . . . .
 H1B H 0.665(4) 0.813(9) 0.306(3) 0.046(13) Uiso 1 1 d . . . . .
 H1C H 0.611(5) 1.062(11) 0.336(3) 0.054(16) Uiso 1 1 d . . . . .
 H1 H 0.416(4) 1.023(9) 0.440(3) 0.035(12) Uiso 1 1 d . . . . .

loop_
  _atom_site_aniso_label
  _atom_site_aniso_U_11
  _atom_site_aniso_U_22
  _atom_site_aniso_U_33
  _atom_site_aniso_U_23
  _atom_site_aniso_U_13
  _atom_site_aniso_U_12
 I1 0.02299(15) 0.02247(16) 0.02772(15) 0.00258(7) -0.00199(9) 0.00289(7)
 S1 0.0203(4) 0.0273(4) 0.0218(4) 0.0006(3) -0.0027(3) 0.0020(3)
 F2 0.0308(10) 0.0277(10) 0.0252(10) -0.0009(8) -0.0098(8) 0.0029(9)
 F1 0.0361(12) 0.0264(10) 0.0271(10) -0.0057(8) -0.0031(9) 0.0050(9)
 O1 0.0249(12) 0.0366(15) 0.0231(12) -0.0006(11) -0.0051(9) 0.0061(11)
 O2 0.0304(13) 0.0280(13) 0.0376(14) -0.0044(12) -0.0048(11) 0.0050(11)
 N1 0.0239(15) 0.0295(16) 0.0222(15) -0.0060(12) -0.0046(12) 0.0033(12)
 C9 0.0245(16) 0.0212(16) 0.0247(16) 0.0000(13) -0.0002(13) -0.0014(14)
 C2 0.0195(15) 0.0246(17) 0.0207(16) 0.0013(13) -0.0022(12) -0.0024(14)
 C8 0.0214(15) 0.0198(16) 0.0265(17) 0.0033(14) -0.0002(13) 0.0025(13)
 C5 0.0176(15) 0.0309(18) 0.0281(18) 0.0032(15) -0.0065(13) 0.0004(14)
 C6 0.0292(18) 0.026(2) 0.037(2) -0.0022(16) -0.0070(15) 0.0045(16)
 C3 0.0284(17) 0.0238(18) 0.0303(18) -0.0030(15) -0.0042(14) 0.0044(15)
 C10 0.0259(16) 0.0225(17) 0.0209(15) -0.0002(13) -0.0025(12) -0.0020(14)
 C7 0.0278(17) 0.0260(18) 0.0303(18) -0.0077(16) -0.0034(14) -0.0006(15)
 C4 0.0289(18) 0.0277(19) 0.0284(18) -0.0038(15) -0.0058(15) -0.0021(15)
 C1 0.0258(19) 0.051(3) 0.0254(19) 0.0029(17) -0.0001(15) -0.0058(18)

_geom_special_details
;
 All esds (except the esd in the dihedral angle between two l.s. planes)
 are estimated using the full covariance matrix.  The cell esds are taken
 into account individually in the estimation of esds in distances, angles
 and torsion angles; correlations between esds in cell parameters are only
 used when they are defined by crystal symmetry.  An approximate (isotropic)
 treatment of cell esds is used for estimating esds involving l.s. planes.
;
loop_
  _geom_bond_atom_site_label_1
  _geom_bond_atom_site_label_2
  _geom_bond_distance
  _geom_bond_site_symmetry_2
  _geom_bond_publ_flag
 I1 C8 2.080(3) . ?
 S1 O1 1.447(2) . ?
 S1 O2 1.430(3) . ?
 S1 N1 1.623(3) . ?
 S1 C1 1.763(4) . ?
 F2 C10 1.345(4) . ?
 F1 C9 1.347(4) . ?
 N1 C2 1.420(4) . ?
 N1 H1 0.82(5) . ?
 C9 C8 1.383(5) . ?
 C9 C10 1.369(5) 3_756 ?
 C2 C3 1.393(5) . ?
 C2 C7 1.393(5) . ?
 C8 C10 1.394(5) . ?
 C5 C6 1.389(5) . ?
 C5 C4 1.370(6) . ?
 C5 H5 0.94(5) . ?
 C6 C7 1.393(5) . ?
 C6 H6 0.94(4) . ?
 C3 C4 1.394(5) . ?
 C3 H3 1.10(5) . ?
 C7 H7 0.97(4) . ?
 C4 H4 1.05(4) . ?
 C1 H1A 0.94(4) . ?
 C1 H1B 1.01(5) . ?
 C1 H1C 0.93(6) . ?

loop_
  _geom_angle_atom_site_label_1
  _geom_angle_atom_site_label_2
  _geom_angle_atom_site_label_3
  _geom_angle
  _geom_angle_site_symmetry_1
  _geom_angle_site_symmetry_3
  _geom_angle_publ_flag
 O1 S1 N1 104.90(15) . . ?
 O1 S1 C1 108.91(18) . . ?
 O2 S1 O1 118.17(16) . . ?
 O2 S1 N1 110.21(16) . . ?
 O2 S1 C1 107.8(2) . . ?
 N1 S1 C1 106.2(2) . . ?
 S1 N1 H1 114(3) . . ?
 C2 N1 S1 125.5(3) . . ?
 C2 N1 H1 116(3) . . ?
 F1 C9 C8 119.6(3) . . ?
 F1 C9 C10 118.3(3) . 3_756 ?
 C10 C9 C8 122.1(3) 3_756 . ?
 C3 C2 N1 122.6(3) . . ?
 C7 C2 N1 117.9(3) . . ?
 C7 C2 C3 119.5(3) . . ?
 C9 C8 I1 121.1(3) . . ?
 C9 C8 C10 117.0(3) . . ?
 C10 C8 I1 121.8(3) . . ?
 C6 C5 H5 118(2) . . ?
 C4 C5 C6 119.3(3) . . ?
 C4 C5 H5 122(2) . . ?
 C5 C6 C7 120.7(4) . . ?
 C5 C6 H6 120(3) . . ?
 C7 C6 H6 119(3) . . ?
 C2 C3 C4 119.7(3) . . ?
 C2 C3 H3 120(3) . . ?
 C4 C3 H3 121(3) . . ?
 F2 C10 C9 119.0(3) . 3_756 ?
 F2 C10 C8 120.1(3) . . ?
 C9 C10 C8 120.9(3) 3_756 . ?
 C2 C7 H7 117(2) . . ?
 C6 C7 C2 119.7(3) . . ?
 C6 C7 H7 123(2) . . ?
 C5 C4 C3 121.1(3) . . ?
 C5 C4 H4 116(2) . . ?
 C3 C4 H4 123(2) . . ?
 S1 C1 H1A 108(3) . . ?
 S1 C1 H1B 107(3) . . ?
 S1 C1 H1C 105(4) . . ?
 H1A C1 H1B 110(4) . . ?
 H1A C1 H1C 110(4) . . ?
 H1B C1 H1C 117(5) . . ?

loop_
  _geom_hbond_atom_site_label_D
  _geom_hbond_atom_site_label_H
  _geom_hbond_atom_site_label_A
  _geom_hbond_distance_DH
  _geom_hbond_distance_HA
  _geom_hbond_distance_DA
  _geom_hbond_angle_DHA
  _geom_hbond_site_symmetry_A
  _geom_hbond_publ_flag
 C3 H3 O2 1.10(5) 2.30(6) 3.056(4) 124(4) . yes
 N1 H1 O1 0.82(5) 2.19(5) 2.982(4) 162(4) 3_676 yes

loop_
  _geom_torsion_atom_site_label_1
  _geom_torsion_atom_site_label_2
  _geom_torsion_atom_site_label_3
  _geom_torsion_atom_site_label_4
  _geom_torsion
  _geom_torsion_site_symmetry_1
  _geom_torsion_site_symmetry_2
  _geom_torsion_site_symmetry_3
  _geom_torsion_site_symmetry_4
  _geom_torsion_publ_flag
 I1 C8 C10 F2 0.0(4) . . . . ?
 I1 C8 C10 C9 -179.8(3) . . . 3_756 ?
 S1 N1 C2 C3 32.4(5) . . . . ?
 S1 N1 C2 C7 -149.1(3) . . . . ?
 F1 C9 C8 I1 -0.7(4) . . . . ?
 F1 C9 C8 C10 179.5(3) . . . . ?
 O1 S1 N1 C2 176.3(3) . . . . ?
 O2 S1 N1 C2 -55.5(3) . . . . ?
 N1 C2 C3 C4 179.6(3) . . . . ?
 N1 C2 C7 C6 -178.5(3) . . . . ?
 C9 C8 C10 F2 179.7(3) . . . . ?
 C9 C8 C10 C9 -0.1(6) . . . 3_756 ?
 C2 C3 C4 C5 -1.7(6) . . . . ?
 C5 C6 C7 C2 -0.7(6) . . . . ?
 C6 C5 C4 C3 1.1(6) . . . . ?
 C3 C2 C7 C6 0.0(5) . . . . ?
 C10 C9 C8 I1 179.8(3) 3_756 . . . ?
 C10 C9 C8 C10 0.1(6) 3_756 . . . ?
 C7 C2 C3 C4 1.1(5) . . . . ?
 C4 C5 C6 C7 0.1(6) . . . . ?
 C1 S1 N1 C2 61.1(3) . . . . ?

_shelx_res_file
;
TITL th_ak-pm1-an2zu1_autored_a.res in P2(1)/c
    ak-pm1_final.res
    created by SHELXL-2017/1 at 14:16:00 on 04-Feb-2022
REM Old TITL TH_AK-PM1-AN2zu1_autored in P2(1)/c
REM SHELXT solution in P2(1)/c
REM R1 0.057, Rweak 0.013, Alpha 0.026, Orientation as input
REM Formula found by SHELXT: C10 N O2 F2 S I
REM Instructions for potential hydrogen bonds
CELL 1.54184 11.4061 5.7465 18.4124 90 90.479 90
ZERR 4 0.0003 0.0001 0.0004 0 0.002 0
LATT 1
SYMM -X,0.5+Y,0.5-Z
SFAC C H F I N O S
UNIT 40 36 8 4 4 8 4
EQIV $1 1-X,2-Y,1-Z

L.S. 100 0 0
PLAN  1
SIZE 0.05 0.07 0.12
TEMP -173
CONF
HTAB C3 O2
HTAB N1 O1_$1
BOND $H
list 4
MORE -1
fmap 2 53
acta
OMIT -14 0 6
OMIT -13 2 5
REM <olex2.extras>
REM <HklSrc "%.\\AK-PM1_final.hkl">
REM </olex2.extras>

WGHT    0.048000    0.464500
FVAR       0.32599
I1    4    0.773230    0.390845    0.462575    11.00000    0.02299    0.02247 =
         0.02772    0.00258   -0.00199    0.00289
S1    7    0.523192    0.772279    0.391364    11.00000    0.02026    0.02726 =
         0.02179    0.00062   -0.00275    0.00204
F2    3    0.871176   -0.055967    0.376416    11.00000    0.03083    0.02765 =
         0.02517   -0.00085   -0.00979    0.00291
F1    3    0.955979    0.352715    0.593623    11.00000    0.03606    0.02639 =
         0.02711   -0.00571   -0.00314    0.00496
O1    6    0.594373    0.794040    0.456439    11.00000    0.02491    0.03664 =
         0.02308   -0.00061   -0.00514    0.00613
O2    6    0.491395    0.543740    0.367560    11.00000    0.03036    0.02804 =
         0.03761   -0.00444   -0.00485    0.00500
N1    5    0.406534    0.924708    0.407486    11.00000    0.02388    0.02946 =
         0.02220   -0.00599   -0.00464    0.00333
C9    1    0.976491    0.177740    0.546708    11.00000    0.02447    0.02120 =
         0.02467    0.00005   -0.00022   -0.00139
C2    1    0.313500    0.965788    0.357366    11.00000    0.01951    0.02455 =
         0.02065    0.00132   -0.00222   -0.00235
C8    1    0.908425    0.157528    0.484521    11.00000    0.02139    0.01976 =
         0.02650    0.00333   -0.00020    0.00250
C5    1    0.126367    1.059141    0.263028    11.00000    0.01765    0.03088 =
         0.02807    0.00322   -0.00648    0.00035
C6    1    0.159042    1.220101    0.315693    11.00000    0.02915    0.02610 =
         0.03671   -0.00217   -0.00699    0.00446
C3    1    0.279822    0.803625    0.304952    11.00000    0.02836    0.02376 =
         0.03030   -0.00302   -0.00418    0.00440
C10   1    0.934339   -0.025853    0.437738    11.00000    0.02590    0.02253 =
         0.02092   -0.00023   -0.00251   -0.00201
C7    1    0.252675    1.175260    0.362704    11.00000    0.02777    0.02604 =
         0.03030   -0.00774   -0.00339   -0.00061
C4    1    0.187213    0.854358    0.257695    11.00000    0.02885    0.02771 =
         0.02843   -0.00379   -0.00578   -0.00211
C1    1    0.595116    0.912154    0.319112    11.00000    0.02578    0.05100 =
         0.02542    0.00289   -0.00007   -0.00581
H5    2    0.064405    1.097787    0.230932    11.00000    0.02406
H1A   2    0.542458    0.918643    0.279701    11.00000    0.02543
H7    2    0.282476    1.288496    0.397585    11.00000    0.02883
H4    2    0.160552    0.740771    0.216396    11.00000    0.02919
H6    2    0.119288    1.362299    0.319387    11.00000    0.02985
H3    2    0.322793    0.632030    0.303600    11.00000    0.05757
H1B   2    0.664746    0.813408    0.305878    11.00000    0.04582
H1C   2    0.611218    1.061579    0.336026    11.00000    0.05417
H1    2    0.415844    1.022654    0.439601    11.00000    0.03533
HKLF 4


REM  th_ak-pm1-an2zu1_autored_a.res in P2(1)/c
REM R1 =  0.0271 for    2119 Fo > 4sig(Fo)  and  0.0292 for all    2285 data
REM    190 parameters refined using      0 restraints

END

WGHT      0.0480      0.4645

REM Highest difference peak  0.632,  deepest hole -0.730,  1-sigma level  0.115
Q1    1   0.7771  0.4048  0.5158  11.00000  0.05    0.63
;
_shelx_res_checksum                10460
_shelx_hkl_file
;
   0   0  -1   -0.11    1.45
   0   0  -2 3352.17  139.88
   0   0  -3    6.07    4.48
   0   0  -3    0.38    2.66
   0   0  -4   20.86    3.95
   0   0  -4   30.59    5.97
   0   0  -5    0.83    3.45
   0   0  -6   49.89    5.28
   0   0  -6   54.32    6.06
   0   0  -7    2.90    3.20
   0   0  -8    1.21    3.20
   0   0  -9    0.91    2.96
   0   0  -9   -0.53    3.27
   0   0  -9    1.58    1.74
   0   0  -9    0.25    2.16
   0   0 -10  583.34   25.21
   0   0 -10  597.83   29.22
   0   0 -10  555.30   25.03
   0   0 -10  605.23   30.09
   0   0 -11   -1.91    3.35
   0   0 -11   -0.77    2.25
   0   0 -11   -1.73    3.08
   0   0 -11    1.00    1.67
   0   0 -12 1789.19   76.65
   0   0 -12 1881.13   82.89
   0   0 -12 1824.73   76.91
   0   0 -12 1941.95   82.51
   0   0 -13   -0.77    2.59
   0   0 -13    1.20    1.82
   0   0 -13   -0.78    3.75
   0   0 -14 1990.31   90.54
   0   0 -14 1991.83   82.99
   0   0 -14 1942.45   83.31
   0   0 -15   -3.11    2.26
   0   0 -15   -1.88    4.33
   0   0 -16  287.04   14.45
   0   0 -16  289.06   14.14
   0   0 -16  299.34   20.88
   0   0  17   -0.93    4.09
   0   0 -17   -1.37    2.41
   0   0 -17   -0.40    2.12
   0   0  18   92.54   11.38
   0   0 -18  116.75    7.12
   0   0 -19    0.20    2.16
   0   0 -20   21.60    2.84
   0   0 -21   -0.94    1.71
   0   0 -21   -0.55    1.49
   0   0 -22  102.23    5.28
   0   0 -22   92.36    5.14
   0  -1   0    0.50    0.72
   0   1   0   -1.06    1.31
   0   1  -1  334.68   14.44
   0   1  -2  401.20   17.08
   0   1  -3 1766.13   73.08
   0   1  -3 1705.24   74.05
   0   1  -4   62.44    5.14
   0   1  -5  163.75    9.80
   0   1  -6 1300.37   57.20
   0   1  -7    0.39    3.12
   0  -1  -7   -2.74    4.00
   0  -1  -8 1981.98   83.95
   0   1  -8 1809.69   81.74
   0  -1  -9  285.58   17.24
   0   1  -9  299.78   16.31
   0   1  -9  258.41   12.75
   0   1 -10  198.28   12.42
   0  -1 -10  189.42   13.32
   0  -1 -10  162.41   12.92
   0   1 -10  164.31    8.91
   0  -1 -10  167.46    8.54
   0  -1 -11  358.06   17.02
   0   1 -11  350.01   17.05
   0  -1 -11  394.62   16.85
   0  -1 -11  404.28   22.44
   0   1 -11  359.29   16.49
   0   1 -11  363.31   20.92
   0  -1 -11  383.22   22.20
   0  -1 -12   15.38    2.66
   0  -1 -12   13.98    4.97
   0   1 -12   11.78    2.01
   0  -1 -12   15.33    4.50
   0   1 -12   13.75    4.15
   0  -1 -12   12.46    2.55
   0   1 -12   10.88    2.90
   0   1 -13  518.57   29.58
   0   1 -13  526.91   24.90
   0   1 -13  539.64   24.13
   0  -1 -13  595.47   31.54
   0  -1 -13  618.35   31.15
   0  -1 -13  566.34   24.87
   0  -1 -14    1.92    2.33
   0   1 -14    3.24    2.65
   0   1 -14    2.09    3.02
   0   1 -14    2.89    1.67
   0   1 -14   -4.70    4.81
   0  -1 -14    2.41    3.45
   0  -1 -14    2.75    4.23
   0   1 -15  406.30   19.64
   0  -1 -15  431.80   19.62
   0  -1 -15  378.20   24.62
   0  -1 -16   10.52    2.67
   0   1 -16   10.66    3.03
   0  -1 -16    3.64    2.52
   0   1  16    5.32    4.82
   0  -1  16    7.20    5.12
   0  -1  17  326.38   22.29
   0  -1 -17  323.50   16.15
   0   1  17  320.06   22.06
   0   1 -17  334.85   16.52
   0  -1 -17  346.48   16.02
   0   1  18   18.24    5.48
   0  -1 -18   31.66    3.49
   0  -1  18   25.60    6.06
   0  -1 -18   34.15    3.65
   0   1 -18   33.42    4.01
   0   1 -19    4.29    2.61
   0  -1 -19    6.41    2.22
   0   1 -19    3.27    2.20
   0  -1 -20  164.89    8.35
   0   1 -20  162.27    8.80
   0   1 -20  170.53    8.63
   0   1 -21   -1.16    1.73
   0   1 -21    1.58    1.41
   0   2   0    5.17    2.06
   0   2  -1  475.01   20.64
   0   2   1  450.14   21.70
   0  -2  -2   10.94    2.35
   0  -2   2    3.98    0.86
   0  -2  -3 1491.15   58.87
   0  -2   3 1329.12   56.69
   0   2   3 1306.28   56.42
   0  -2  -4    5.82    4.19
   0  -2  -5 2035.77   90.26
   0  -2  -6    8.70    2.49
   0   2   6    7.01    3.09
   0  -2  -6   12.00    5.29
   0   2  -7 2183.77   85.88
   0   2   7 1956.87   86.29
   0  -2  -7 2240.84   85.84
   0  -2  -7 2280.11   92.56
   0   2   8   13.86    3.16
   0   2  -8   19.14    3.42
   0  -2  -8   16.75    5.14
   0   2  -8   18.21    3.35
   0  -2  -8   17.93    2.81
   0  -2  -9 1012.58   44.54
   0  -2  -9 1085.65   51.05
   0   2   9 1030.06   45.13
   0   2  -9 1112.92   45.22
   0   2  -9  999.97   44.63
   0   2 -10  312.33   14.34
   0  -2 -10  293.48   19.12
   0   2 -10  268.55   13.83
   0  -2 -10  269.63   13.67
   0   2  10  286.71   14.06
   0   2 -11  356.99   17.62
   0  -2 -11  370.87   17.56
   0   2 -11  391.84   17.92
   0  -2 -11  393.96   23.37
   0   2  11  363.89   17.54
   0   2 -12    8.19    2.82
   0  -2 -12    7.97    2.49
   0  -2 -12   11.02    4.96
   0  -2 -12    4.35    4.10
   0   2 -12    9.46    3.16
   0  -2 -13    1.69    4.22
   0   2 -13    2.90    2.05
   0   2  13    4.42    3.94
   0   2 -13    1.64    2.54
   0  -2  13    4.70    4.12
   0  -2 -13    0.90    4.13
   0  -2 -13    0.67    2.34
   0   2 -14   55.03    4.44
   0  -2 -14   62.90    5.14
   0  -2 -14   38.45    7.76
   0  -2 -14   57.76    8.39
   0  -2  14   52.53    8.16
   0   2  14   57.81    8.08
   0  -2 -15  329.34   22.50
   0   2 -15  374.62   17.30
   0   2  15  397.10   23.56
   0  -2  15  355.82   23.25
   0  -2 -16   -3.82    3.81
   0  -2  16    8.14    4.55
   0   2  16    0.77    3.56
   0   2 -16    1.71    1.99
   0   2  17  338.01   22.44
   0   2 -17  414.90   17.66
   0  -2 -17  328.33   21.86
   0   2  17  388.77   25.07
   0  -2  17  320.54   22.18
   0   2 -18   66.14    4.91
   0   2 -18   54.27    4.32
   0   2 -19  405.50   18.82
   0   2 -20   41.12    3.55
   0   2 -21  201.71    9.69
   0   3   0   -0.54    1.66
   0   3   0   -1.34    3.98
   0   3   0    0.22    1.94
   0   3   0    0.49    2.13
   0   3   1  181.44   10.74
   0   3   1  172.08    9.09
   0   3  -1  178.20    9.08
   0   3   1  181.31   10.08
   0   3  -1  185.29   11.08
   0   3   1  160.36   10.93
   0   3   1  170.61    8.73
   0   3  -2   81.74    5.16
   0   3   2   73.53    5.15
   0   3   2   72.54    4.72
   0   3  -2   82.82    6.58
   0   3   2   80.70    6.74
   0   3  -3  201.00   10.19
   0   3   3  209.98   12.85
   0   3  -3  199.60   11.14
   0   3   3  205.05    9.92
   0   3   4 1290.74   52.62
   0   3  -4 1166.52   52.69
   0   3   4 1254.19   54.75
   0   3  -4 1199.48   52.35
   0   3   4 1388.94   57.37
   0   3  -4 1273.99   52.56
   0   3   4 1311.44   53.53
   0  -3  -4 1198.62   52.70
   0   3  -5   14.37    2.25
   0   3  -5   15.81    2.31
   0   3  -5   14.11    2.32
   0   3  -5   17.18    2.56
   0   3   5   14.96    3.14
   0   3   5   14.19    2.30
   0  -3  -5   14.33    2.84
   0   3   5   23.16    5.13
   0   3   5   12.46    4.06
   0  -3  -6 1604.33   66.79
   0  -3  -6 1801.39   72.86
   0   3   6 1503.70   68.11
   0   3  -6 1555.13   66.34
   0   3  -6 1509.12   66.22
   0   3  -6 1582.98   66.41
   0   3   6 1622.28   66.45
   0  -3  -7   36.46    3.81
   0   3   7   38.36    4.93
   0   3  -7   38.49    3.61
   0  -3  -7   29.62    6.65
   0   3  -7   37.52    3.94
   0   3   7   42.01    3.59
   0   3  -8  819.08   35.53
   0   3   8  839.00   36.90
   0   3  -8  808.93   35.81
   0  -3  -8  828.84   35.59
   0   3   8  834.97   35.49
   0  -3  -9   75.12   10.56
   0   3  -9   92.13    6.16
   0   3   9   95.17    6.95
   0  -3  -9   96.13    5.96
   0  -3 -10  686.22   28.81
   0   3  10  682.18   29.72
   0  -3 -10  652.63   36.78
   0   3 -10  631.39   29.35
   0   3 -10  562.29   28.77
   0   3 -11   86.14    6.26
   0  -3 -11   78.42   10.64
   0   3  11   74.13    5.47
   0   3 -11   58.15    5.69
   0  -3 -11   76.82    5.54
   0   3  11   76.12    6.06
   0  -3 -12  173.62    9.74
   0   3  12  176.61    9.62
   0   3 -12  182.43   10.29
   0   3 -12  167.48   10.04
   0   3  13   42.45    3.92
   0  -3 -13   43.10    4.23
   0   3 -13   44.63    4.61
   0   3 -13   36.80    4.35
   0   3  13   41.88    3.76
   0  -3 -14    8.61    2.76
   0  -3 -14    8.04    4.46
   0   3 -14    8.02    2.91
   0   3 -14    6.55    2.60
   0   3  14    5.51    1.83
   0   3  14    3.35    1.84
   0   3 -15   88.80    6.37
   0   3 -15   96.55    6.38
   0   3  15   95.97   11.28
   0  -3 -15   94.19   10.01
   0  -3 -15   92.25    6.34
   0   3 -16  359.81   16.90
   0  -3 -16  370.25   17.07
   0   3 -16  330.32   16.95
   0   3 -17   52.13    4.31
   0  -3 -17   52.14    4.34
   0   3 -18  358.07   15.43
   0   3  18  303.33   14.70
   0   3 -19    2.57    1.82
   0   4   0  778.95   34.08
   0   4   0  802.18   34.67
   0   4   0  790.38   35.53
   0   4   0  787.91   37.35
   0   4  -1    9.91    1.62
   0   4   1   10.08    1.89
   0   4  -1    9.23    2.10
   0   4  -1   10.01    2.59
   0   4   1   10.91    5.50
   0   4  -1    6.73    4.23
   0   4   1   11.29    3.22
   0   4  -1   13.30    3.07
   0   4  -2  770.96   34.11
   0   4   2  830.96   34.86
   0   4  -2  814.38   34.72
   0   4  -2  784.11   35.01
   0   4   2  761.89   35.96
   0   4   2  806.23   38.17
   0   4  -2  815.35   36.67
   0   4   2  824.45   35.11
   0   4  -2  794.39   35.82
   0   4  -3  172.45    8.74
   0   4   3  167.11   12.29
   0   4   3  182.08    9.33
   0   4  -3  170.80   10.35
   0   4   3  167.18   10.20
   0   4  -3  163.94    9.97
   0   4  -4  746.58   33.63
   0   4   4  767.22   33.21
   0   4  -4  719.40   33.62
   0   4   4  802.75   36.71
   0   4   4  758.02   37.52
   0   4   5   23.30    5.01
   0   4  -5   18.45    3.03
   0   4   5   14.37    4.93
   0   4   5   14.50    2.61
   0   4  -5   19.89    3.08
   0   4   6   19.35    5.00
   0   4   6   19.48    2.88
   0   4   6   29.23    5.04
   0   4   7  150.83    8.27
   0  -4  -7  129.53    8.11
   0   4   7  123.49   12.36
   0   4   7  129.61    9.70
   0  -4  -8  110.65    7.41
   0   4   8  110.76    7.33
   0   4   8  137.50    9.04
   0   4   8  118.89   12.77
   0   4   9   50.19    5.63
   0   4   9   57.04    5.00
   0   4   9   51.34    9.29
   0  -4  -9   55.19    4.92
   0  -4 -10  385.52   17.67
   0   4  10  339.97   17.44
   0   4  10  387.33   18.84
   0  -4 -11   26.70    3.60
   0   4  11   17.91    3.22
   0   4  11   26.41    3.45
   0   4  11   22.67    4.10
   0   4  11   19.58    7.03
   0  -4 -12  263.42   12.70
   0   4  12  241.82   12.30
   0   4  12  231.03   20.14
   0   4  12  232.53   12.42
   0  -4 -13    7.06    2.51
   0   4  13   12.11    2.54
   0   4  13    5.48    2.03
   0   4  13    9.06    5.22
   0   4  14  312.45   15.02
   0  -4 -14  324.68   15.31
   0  -4 -15   13.10    2.49
   0   4  15   11.05    1.92
   0   4  16  263.87   12.59
   0   4  17    1.64    1.18
   0   5   0    1.02    1.41
   0   5   0    2.17    1.94
   0   5   0    5.76    4.19
   0   5   0   -1.22    2.52
   0   5   1 1281.49   56.23
   0   5  -1 1291.74   55.93
   0   5  -1 1345.65   56.57
   0   5   1 1376.14   59.13
   0   5  -1 1284.11   57.62
   0   5   1 1293.12   56.39
   0   5   1 1314.84   55.76
   0   5   2  235.15   11.47
   0   5   2  228.37   12.00
   0   5  -2  220.14   11.32
   0   5  -2  210.35   12.47
   0   5  -2  221.45   12.02
   0   5   2  223.52   14.41
   0   5   2  239.20   12.05
   0   5   3  388.97   18.63
   0   5  -3  353.04   18.77
   0   5   3  392.91   18.26
   0   5   3  402.08   19.06
   0   5   4   81.28    5.56
   0   5   4   89.23    6.58
   0   5  -4   79.69    5.96
   0   5   4   84.39    6.01
   0   5   5   94.63    6.14
   0   5   5   90.63    6.41
   0   5   5   89.32    6.90
   0   5   6   12.28    2.62
   0   5   6   13.48    4.32
   0   5   6   11.61    2.95
   0   5   7    6.34    2.43
   0   5   7    8.78    4.12
   0   5   8   72.12    6.77
   0   5   8   72.69    5.96
   0   5   8   76.59    5.90
   0   5   9  147.09    9.21
   0   5   9  157.38    9.19
   0   5  10   94.81    6.99
   0   5  10  107.82    6.96
   0   5  10  113.90    6.77
   0   5  11  363.56   17.19
   0   5  11  358.27   16.74
   0   5  12   11.08    1.95
   0   5  12   12.58    2.31
   0   5  13  517.86   22.91
   0   5  13  499.11   22.55
   0   5  14   34.60    2.76
   0   5  14   32.78    2.84
   0   5  15  213.12    9.99
   0   6   0  162.35    9.08
   0   6   1    0.89    1.63
   0   6   1    0.85    2.08
   0   6   2   72.18    5.07
   0   6   2   79.71    5.45
   0   6   3   10.70    2.51
   0   6   3    9.40    2.35
   0   6   4   10.21    2.51
   0   6   4   16.37    2.80
   0   6   5  247.53   12.20
   0   6   5  230.86   11.61
   0   6   5  253.92   12.57
   0   6   6   -0.33    1.53
   0   6   6    2.57    2.20
   0   6   6   -1.20    2.36
   0   6   7  306.96   15.20
   0   6   7  336.30   15.20
   0   6   7  324.36   15.74
   0   6   8    1.27    1.74
   0   6   8    1.56    1.62
   0   6   9  196.62   10.01
   0   6   9  200.62    9.61
   0   6  10    5.31    1.62
   0   6  10    5.74    1.64
   0   6  11    3.68    1.48
   1   0 -22  228.95   10.78
   1   0 -22  239.16   10.81
   1   0 -21    0.29    1.62
   1   0 -21   -0.84    1.48
   1   0 -20  197.77   10.46
   1   0 -20  224.97   10.71
   1   0 -19   -2.39    2.37
   1   0 -18  547.40   24.79
  -1   0  18  525.99   31.15
   1   0 -17   -0.97    3.83
  -1   0  17    1.83    4.21
   1   0 -17    0.22    2.52
  -1   0  16  355.23   24.21
   1   0 -16  406.00   18.73
   1   0 -16  378.73   25.19
   1   0 -15    0.21    2.34
  -1   0  15    0.88    4.22
   1   0 -15    2.77    4.25
   1   0 -15    2.00    2.16
   1   0 -14   55.68    4.47
   1   0 -14   57.18    7.89
  -1   0  14   38.07    7.27
   1   0 -14   47.97    4.08
   1   0 -13    1.10    2.07
   1   0 -13   -0.70    1.93
   1   0 -13    0.80    3.70
   1   0 -12  283.27   13.52
   1   0 -12  284.91   18.51
   1   0 -11    1.41    1.81
   1   0 -11    1.05    2.97
   1   0 -11   -1.94    2.53
   1   0 -11    2.07    4.03
   1   0 -10  487.98   25.49
   1   0 -10  518.14   22.41
   1   0 -10  493.82   22.62
   1   0  -9   -0.61    2.68
   1   0  -9   -0.58    4.23
   1   0  -9    0.85    2.92
   1   0  -9    0.42    1.98
   1   0  -8 2043.66   89.52
   1   0  -8 2134.90   91.64
   1   0  -7    0.33    2.77
   1   0  -7   -1.01    4.32
   1   0  -6 2646.89  101.14
   1   0  -6 2035.81  101.97
   1   0  -5   -0.25    3.16
   1   0  -4 9999.00  412.56
   1   0  -3    0.15    2.41
  -1   0   2  759.90   30.86
   1   0  -2  689.04   30.28
  -1   0   1    0.32    1.10
  -1   0   0    8.29    1.25
   1   0   0    6.65    1.10
   1   0   1    0.71    0.86
  -1   0  -2   35.15    3.06
  -1   0  -3    0.51    2.60
  -1   0  -4  905.07   41.92
  -1   0  -4  987.36   41.92
  -1   0  -5   -0.63    3.49
  -1   0  -5   -1.81    4.44
  -1   0  -6 3286.67  128.76
  -1   0  -6 2744.02  129.26
  -1   0  -7    0.80    3.27
  -1   0  -7   -2.63    5.45
  -1   0  -8 3420.00  148.31
  -1   0  -8 3486.49  147.01
  -1   0  -9    0.77    1.76
  -1   0  -9    2.96    4.06
  -1   0  -9   -1.50    3.46
  -1   0  -9    0.69    2.34
  -1   0 -10 1867.85   78.56
  -1   0 -10 1862.74   78.65
  -1   0 -10 1910.49   83.38
  -1   0 -10 1946.09   84.40
  -1   0 -11   -0.75    1.85
  -1   0 -11    2.10    3.97
  -1   0 -11    4.41    3.68
  -1   0 -11    2.81    2.34
  -1   0 -12  144.97    8.14
  -1   0 -12  145.63    7.84
  -1   0 -12  164.56   12.49
  -1   0 -12  142.94   12.26
  -1   0 -13    0.82    4.18
  -1   0 -13    1.21    1.95
  -1   0 -13   -0.19    2.43
  -1   0 -13    2.32    3.85
  -1   0 -14  126.65    7.94
  -1   0 -14  140.04    7.64
  -1   0 -15   -1.14    2.93
  -1   0 -15   -0.59    2.06
  -1   0 -16  371.39   17.43
  -1   0 -17    0.45    2.67
  -1   0 -17    0.19    1.96
  -1   0 -18  185.97    9.64
  -1   0 -18  194.87   10.17
  -1   0 -19    1.19    2.15
  -1   0 -20   86.44    5.48
  -1   0 -21   -0.67    1.68
  -1   0 -22  386.55   16.29
  -1   0 -22  353.78   16.23
   1   1 -22    0.86    1.25
   1  -1 -22    2.48    1.14
   1  -1 -21   97.17    5.23
   1   1 -21   88.14    5.33
   1   1 -21   83.17    5.13
   1   1 -20    0.51    1.74
   1   1 -20   -0.37    1.88
   1   1 -20   -0.55    2.13
   1   1 -19  316.25   15.73
   1  -1 -19  328.45   15.14
   1   1 -19  332.90   15.67
  -1   1  18   31.52    6.77
   1  -1 -18   47.42    4.02
   1   1 -18   41.69    4.34
  -1  -1  18   31.22    6.74
   1   1 -18   49.32    4.31
   1  -1 -17  443.74   19.76
  -1   1  17  389.28   25.65
   1  -1 -17  438.08   20.21
   1   1 -17  415.45   20.30
  -1  -1  17  401.01   25.93
  -1  -1  16   46.88    8.05
  -1   1  16   48.09    7.83
   1   1 -16   62.05    5.09
   1  -1 -16   55.89    4.76
   1   1 -16   39.47    7.15
   1  -1 -16   58.11    4.60
   1  -1 -15  242.91   11.64
  -1   1  15  227.26   17.19
   1   1 -15  210.24   11.95
   1  -1 -15  235.94   11.98
  -1  -1  15  244.45   17.57
   1   1 -15  198.15   16.52
   1  -1 -14  218.49   11.28
   1  -1 -14  224.34   10.91
  -1   1  14  234.49   16.82
   1   1 -14  220.35   11.50
   1   1 -14  207.66   15.99
   1  -1 -14  198.97   15.28
   1  -1 -14  199.33   16.62
  -1  -1  14  188.38   15.88
   1  -1 -13   -0.40    2.08
  -1  -1  13   -0.78    4.18
   1   1 -13    1.71    2.44
   1   1 -13   -0.71    3.68
   1  -1 -13    1.39    3.40
  -1   1  13   -0.77    4.25
   1  -1 -13   -1.69    3.90
   1  -1 -12  799.96   40.44
   1  -1 -12  783.58   34.21
   1   1 -12  725.95   38.49
   1   1 -12  784.48   34.46
   1  -1 -12  811.79   39.27
   1   1 -11  437.57   19.96
   1  -1 -11  452.56   24.26
   1   1 -11  429.39   19.34
   1  -1 -11  485.93   25.67
   1   1 -11  420.90   23.62
   1   1 -11  405.87   19.87
   1  -1 -10  564.38   29.08
   1   1 -10  542.44   28.50
   1   1 -10  585.09   25.25
   1   1 -10  563.16   24.60
   1   1 -10  533.10   25.05
   1  -1  -9  871.06   40.46
   1   1  -9  847.17   40.40
   1   1  -9  850.14   36.34
   1   1  -9  800.08   36.16
   1  -1  -8  158.23    8.31
   1   1  -8  166.66   11.83
   1  -1  -8  157.68   11.58
   1   1  -7  544.30   28.08
   1  -1  -7  568.81   28.20
   1   1  -6   15.70    5.09
   1  -1  -6    4.05    4.42
   1   1  -5 1469.88   65.81
   1  -1  -5 1519.42   66.02
   1   1  -4  958.47   44.03
   1  -1  -4 1024.47   44.34
  -1  -1   3  513.30   22.81
  -1   1   3  498.79   22.64
  -1   1   2  113.76    6.01
  -1  -1   2  108.93    5.99
  -1   1   1  435.68   18.78
   1   1  -1  445.42   19.49
  -1  -1   1  432.67   18.80
   1   1   0 1044.88   44.71
  -1  -1   0 1047.95   43.97
   1   1   0 1084.68   44.91
   1  -1   0 1058.57   43.95
   1   1   0 1047.93   43.95
  -1  -1  -1  224.51   10.58
  -1   1  -1  244.14   10.69
  -1  -1  -2 2781.41  115.72
  -1  -1  -2 2727.03  115.19
  -1   1  -2 2823.42  115.31
  -1  -1  -3  294.54   14.25
  -1  -1  -3  280.66   13.88
  -1   1  -3  270.38   13.83
  -1  -1  -4 1014.37   47.19
  -1   1  -4 1015.36   47.19
  -1  -1  -5 1649.05   67.08
  -1   1  -5 1363.65   65.58
  -1  -1  -5 1395.04   65.80
  -1   1  -5 1577.01   64.40
  -1   1  -6    5.13    3.10
  -1   1  -6    7.83    4.96
  -1  -1  -6    5.54    4.78
  -1  -1  -6    4.48    4.34
  -1   1  -7 1748.32   71.99
  -1  -1  -7 1584.07   72.83
  -1  -1  -7 1767.11   72.19
  -1   1  -8   24.26    4.93
  -1  -1  -8   31.27    6.45
  -1  -1  -8   27.87    3.04
  -1   1  -8   27.31    3.04
  -1  -1  -9 1216.62   51.89
  -1   1  -9 1234.35   56.76
  -1  -1  -9 1341.84   58.98
  -1  -1 -10   36.31    6.74
  -1   1 -10   28.95    4.90
  -1   1 -10   23.59    3.18
  -1  -1 -10   27.22    2.81
  -1  -1 -10   36.27    6.01
  -1  -1 -11   13.46    2.58
  -1  -1 -11   17.98    5.50
  -1  -1 -11   16.50    4.74
  -1   1 -11   13.06    2.80
  -1   1 -11    9.99    1.86
  -1   1 -11   12.59    4.00
  -1  -1 -11   15.85    2.45
  -1  -1 -12   24.10    3.03
  -1  -1 -12   28.66    3.35
  -1   1 -12   22.76    2.44
  -1  -1 -12   37.75    6.17
  -1  -1 -12   28.48    6.57
  -1   1 -12   27.92    3.48
  -1   1 -13   42.88    4.19
  -1  -1 -13   44.25    3.88
  -1   1 -13   37.09    3.18
  -1  -1 -13   35.14    6.68
  -1  -1 -13   42.14    4.02
  -1  -1 -13   46.39    7.60
  -1   1 -14  400.01   18.10
  -1  -1 -14  401.96   23.91
  -1  -1 -14  374.70   17.43
  -1  -1 -14  374.13   17.71
  -1  -1 -14  372.26   24.17
  -1   1 -14  349.42   16.83
  -1  -1 -15   36.51    3.84
  -1  -1 -15   30.64    6.38
  -1   1 -15   30.12    4.30
  -1  -1 -16  441.72   28.64
   1   1  16  509.94   29.88
  -1  -1 -16  519.67   23.51
  -1   1 -16  522.34   23.79
  -1   1 -17   39.04    4.36
  -1  -1 -17   34.06    3.80
   1   1  17   31.39    6.20
   1   1  17   26.22    7.06
  -1  -1 -17   36.80    3.82
  -1   1 -18  114.07    6.99
   1   1  18   75.97    9.90
  -1  -1 -18   98.48    6.33
   1  -1  18   88.24    9.84
  -1  -1 -18  111.21    6.45
  -1  -1 -19  502.02   22.47
  -1  -1 -19  484.55   22.50
  -1   1 -19  522.61   23.08
  -1  -1 -20   14.14    2.34
  -1   1 -20   14.47    2.65
  -1   1 -20   19.57    2.35
  -1   1 -21  247.87   11.40
  -1   1 -21  229.69   11.34
  -1  -1 -22   21.43    1.99
  -1   1 -22   19.54    1.98
   1   2 -21   34.73    2.92
   1  -2 -21   33.12    2.53
   1   2 -20    4.40    2.02
   1   2 -19   21.34    3.10
   1   2 -19   17.97    2.59
   1   2 -18   64.90    4.88
   1   2 -18   58.66    4.46
   1   2 -17  150.23    8.00
   1   2 -17  148.94    8.42
  -1   2  17  103.09   11.60
  -1  -2  17  107.66   11.83
   1  -2 -16    0.97    3.59
   1   2 -16    0.49    2.57
  -1   2  16   -1.52    3.85
   1   2 -16   -0.62    2.06
  -1  -2  16   -0.81    3.88
   1  -2 -15  296.98   22.02
  -1   2  15  354.14   21.99
   1  -2 -15  361.07   16.82
   1   2 -15  340.83   16.25
  -1  -2  15  325.96   21.89
   1  -2 -15  308.35   20.51
   1  -2 -14  163.33   14.47
   1  -2 -14  166.72   13.50
  -1  -2  14  179.54   14.64
   1  -2 -14  169.27    9.55
   1   2 -14  166.16    9.23
  -1   2  14  172.64   14.00
   1  -2 -13  449.53   27.62
   1  -2 -13  493.01   27.44
  -1   2  13  466.21   27.40
   1  -2 -13  472.37   22.21
   1   2 -13  490.21   22.13
  -1  -2  13  482.97   27.97
   1  -2 -12    1.91    2.35
   1  -2 -12    1.61    3.45
  -1  -2  12   -0.82    4.64
   1   2 -12   -1.07    2.61
   1   2 -12    1.74    2.29
  -1   2  12    2.65    1.65
  -1   2  12   -0.75    3.98
   1  -2 -12    3.09    3.71
   1  -2 -11  848.27   45.67
  -1   2  11  908.32   45.82
   1   2 -11  933.21   40.65
   1   2 -11  806.86   42.82
  -1  -2  11 1043.17   47.60
   1   2 -11  992.68   41.34
   1  -2 -11  946.37   40.53
  -1   2  10   21.96    5.03
  -1  -2  10   38.23    6.93
   1  -2 -10   24.98    3.16
   1   2 -10   16.42    3.56
   1   2 -10   23.96    4.06
   1   2 -10   16.26    3.08
   1  -2 -10   30.08    5.74
   1   2  -9 1162.59   51.25
   1  -2  -9 1208.91   56.16
   1   2  -9 1122.88   50.45
   1  -2  -9 1266.54   50.67
  -1  -2   9 1312.01   57.59
  -1   2   9 1140.54   54.95
   1   2  -9 1121.19   52.44
  -1   2   9 1176.78   50.73
  -1  -2   8   85.90   10.33
   1   2  -8  128.84    6.77
  -1   2   8  116.73    7.09
  -1   2   8   98.59    9.43
   1  -2  -8  132.44    7.08
   1  -2  -8  127.69   10.74
   1   2  -8   96.85    7.78
   1   2  -8  112.57    7.38
   1  -2  -7  132.76    7.38
  -1   2   7  131.94    9.57
   1   2  -7  135.44    7.66
  -1  -2   7  134.08   10.96
   1   2  -7  136.87    6.92
   1   2  -7  101.82    7.89
  -1   2   7  131.02    7.73
  -1  -2   6   10.30    3.86
   1   2  -6    9.62    2.27
   1   2  -6    9.20    2.55
  -1   2   6   11.98    3.18
  -1   2   6   13.78    3.46
   1   2  -6    9.11    2.52
   1  -2  -6    9.45    2.44
   1   2  -5  136.39    9.00
  -1  -2   5  160.59    8.86
  -1   2   5  133.15    7.87
   1  -2  -4   13.96    4.10
  -1  -2   4   14.83    2.78
   1   2  -4    6.76    1.56
  -1   2   4   13.14    2.47
   1   2  -4   16.64    3.87
   1   2  -3 1147.81   47.70
   1  -2  -3 1019.38   47.94
  -1  -2   3 1065.65   46.49
  -1   2   3 1137.77   46.50
  -1  -2   2  270.37   12.18
   1   2  -2  266.53   12.93
  -1   2   2  280.69   12.14
   1   2  -1 3881.63  161.66
   1   2   0   83.37    5.75
  -1   2  -1 2170.76   91.45
   1   2   1 2309.24   93.67
   1   2   2    9.62    1.49
   1  -2   2    8.56    1.41
   1   2   2    8.83    2.93
   1   2   3  851.07   38.97
  -1  -2  -4    6.34    3.15
  -1  -2  -5  241.02   14.89
   1   2   6  423.02   19.72
   1   2   6  439.16   20.25
  -1  -2  -6  489.33   25.29
  -1   2  -7   85.30    5.33
  -1  -2  -7   75.79    9.89
   1   2   7   86.28    6.04
   1   2   7   82.49    5.60
  -1   2  -7   80.33    5.25
  -1  -2  -8   12.76    6.26
   1   2   8    6.73    3.11
  -1   2  -8    9.84    2.64
   1   2   9   32.74    4.19
  -1   2  -9   33.87    3.53
  -1  -2  -9   42.15    3.77
   1   2  10    0.95    2.43
  -1  -2 -10    1.59    2.24
  -1  -2 -10    2.88    4.88
  -1   2 -10   -0.69    2.35
  -1   2 -11  989.17   45.44
  -1  -2 -11 1144.72   54.29
  -1  -2 -11 1082.48   45.90
   1   2  11 1095.38   45.91
  -1   2 -12  144.39    8.27
  -1  -2 -12  141.40   13.51
  -1   2 -12  134.49    8.18
  -1  -2 -12  150.95    8.43
  -1  -2 -13 1747.19   85.06
  -1  -2 -13 1862.10   78.18
  -1   2 -13 1790.66   77.97
  -1   2 -13 1882.85   77.99
  -1   2 -14    5.62    2.89
   1   2  14   12.59    5.43
  -1  -2 -14    7.31    4.65
  -1   2 -15  791.49   34.09
  -1  -2 -15  754.72   40.25
   1   2  15  759.11   41.63
  -1   2 -15  738.72   33.08
  -1   2 -16    4.68    1.93
   1   2  16    3.13    3.69
  -1   2 -16    3.51    2.98
  -1  -2 -16    5.92    4.06
   1  -2  16   10.09    4.34
   1   2  16    1.01    3.88
  -1   2 -17  129.37    6.84
   1  -2  17   86.67    9.98
   1   2  17  135.65   12.80
   1   2  17  107.40   11.21
  -1  -2 -17  108.47   11.01
  -1   2 -18   53.47    4.54
  -1  -2 -18   55.79    4.47
  -1  -2 -19   35.24    3.41
  -1   2 -19   37.95    3.60
  -1   2 -20   29.53    2.91
  -1   2 -21   -0.54    1.32
   1   3 -19   39.18    3.44
  -1   3  18   54.78    3.67
   1   3 -18   68.12    4.69
  -1   3  17   12.95    2.00
   1   3 -17   10.97    2.63
   1   3 -16  561.37   26.29
   1  -3 -16  599.00   26.37
   1  -3 -15  112.04    7.11
   1   3 -15  110.10    7.22
  -1   3  14  632.90   28.29
   1   3 -14  606.78   28.62
   1  -3 -14  585.36   33.67
   1   3 -14  702.36   29.59
   1   3 -14  624.31   29.32
   1  -3 -14  680.09   29.13
   1   3 -13   48.53    4.63
   1   3 -13   56.50    5.29
   1  -3 -13   44.25    7.28
  -1   3  13   46.66    4.09
   1  -3 -13   58.58    4.74
   1   3 -13   56.15    5.35
   1   3 -12  284.96   14.46
   1  -3 -12  276.72   13.71
   1   3 -12  253.99   14.23
  -1   3  12  269.67   13.27
   1  -3 -12  231.44   18.51
   1   3 -12  267.14   13.79
   1   3 -11   18.48    3.46
   1  -3 -11   23.42    3.51
   1   3 -11   20.74    4.08
   1  -3 -11   24.25    5.97
   1   3 -11   23.04    4.34
  -1   3  11   19.92    2.95
  -1   3  11   19.77    2.78
  -1   3  10  316.01   16.27
   1   3 -10  356.68   17.53
   1  -3 -10  382.51   17.02
   1   3 -10  327.55   16.72
   1   3 -10  315.03   17.38
  -1   3  10  400.76   17.82
   1  -3 -10  369.27   23.03
  -1   3   9  301.04   14.91
   1   3  -9  242.66   14.40
   1  -3  -9  268.79   19.37
  -1   3   9  282.38   13.78
   1   3  -9  268.14   13.93
   1   3  -9  313.56   14.87
   1  -3  -9  313.31   14.38
   1   3  -8  450.80   20.23
   1   3  -8  438.07   20.41
   1  -3  -8  394.63   25.30
  -1   3   8  442.24   20.81
   1  -3  -8  407.60   19.91
  -1   3   8  417.17   19.48
  -1   3   7  201.66    9.66
   1  -3  -7  173.91    9.89
   1   3  -7  185.99    9.39
  -1   3   7  206.84   11.20
   1   3  -7  196.92   10.01
   1   3  -7  188.20   10.02
   1  -3  -6   15.79    2.83
   1  -3  -6   19.25    5.41
  -1   3   6   25.45    4.22
  -1   3   6   22.54    2.53
   1   3  -6   24.01    2.94
   1   3  -6   23.69    2.79
   1   3  -6   20.57    2.62
   1  -3  -5   10.34    4.08
   1  -3  -5   11.81    2.41
  -1   3   5    8.95    3.90
   1   3  -5   11.07    2.12
   1   3  -5   12.98    2.52
   1   3  -5   13.40    2.56
  -1   3   5   11.62    2.06
   1  -3  -4  613.99   27.67
  -1   3   4  554.73   24.17
  -1   3   4  620.53   26.75
   1   3  -4  589.46   25.20
   1   3  -4  504.83   24.36
   1   3  -4  524.78   24.08
   1   3  -3   17.42    3.57
   1   3  -3   17.08    2.58
   1   3  -3   14.35    2.31
  -1   3   3   16.43    2.24
  -1   3   2 2022.93   84.35
  -1   3   2 2069.20   87.17
   1   3  -2 2001.06   84.64
  -1   3   2 2045.53   86.96
  -1   3   2 1993.25   85.24
  -1   3   1  516.03   23.35
  -1   3   1  523.41   24.10
  -1   3   1  564.38   25.34
  -1   3   1  484.08   25.61
   1   3  -1  541.61   23.69
  -1   3   1  552.83   23.34
  -1   3   0 1631.60   72.45
  -1   3   0 1788.21   73.95
   1   3   0 1627.70   73.33
  -1   3   0 1752.47   71.45
  -1   3   0 1682.68   72.27
   1   3   0 1732.20   71.87
  -1   3  -1    6.00    1.42
   1   3   1   11.66    2.15
  -1   3  -1    8.27    2.74
  -1   3  -1    8.86    2.09
  -1   3  -1    7.18    1.76
  -1   3  -1    9.69    3.71
   1   3   1    9.00    2.99
   1   3   1    7.28    2.39
   1   3   2 1048.69   47.08
   1   3   2 1028.54   44.30
  -1   3  -2 1070.90   45.48
   1   3   2 1121.31   47.95
  -1   3  -2 1039.57   44.20
  -1   3  -2 1045.46   44.05
  -1   3  -2  985.70   44.68
   1   3   3  242.26   12.94
  -1   3  -3  230.53   11.04
  -1   3  -3  230.57   11.73
   1   3   3  223.35   11.08
  -1   3  -3  217.79   10.67
   1   3   3  250.63   14.54
   1   3   3  240.41   11.56
   1   3   4  294.05   13.76
   1   3   4  263.54   16.57
   1   3   4  272.24   14.78
   1   3   4  276.00   13.19
   1   3   5  814.75   39.68
   1   3   5  797.12   35.22
   1   3   5  793.81   36.29
   1   3   6  262.95   16.55
   1   3   6  207.27   12.29
   1   3   6  237.11   11.71
  -1  -3  -6  246.23   11.38
  -1   3  -6  222.30   10.60
  -1   3  -6  171.56   10.66
  -1   3  -6  209.37   10.22
  -1   3  -7  400.15   18.13
  -1   3  -7  377.38   18.17
  -1  -3  -7  420.71   18.44
   1   3   7  366.57   19.50
   1   3   7  395.96   18.96
  -1   3  -7  372.51   17.59
   1   3   7  401.92   24.84
  -1   3  -8   -1.53    2.59
  -1  -3  -8    1.44    2.25
   1   3   8    1.09    4.66
   1   3   8    1.37    3.74
  -1   3  -8   -0.61    2.83
  -1   3  -8   -0.35    2.01
  -1   3  -9   91.43    6.06
   1   3   9   84.56   12.01
  -1  -3  -9   87.57    5.85
  -1   3  -9   81.78    5.82
  -1   3  -9   74.89    6.09
   1   3   9   85.28    7.03
  -1   3 -10  426.79   19.44
  -1  -3 -10  431.41   19.46
  -1   3 -10  438.27   19.81
  -1   3 -10  367.77   19.19
   1   3  10  434.37   20.62
   1   3  11   55.53    5.12
  -1   3 -11   44.47    4.64
  -1   3 -11   38.08    4.37
  -1  -3 -11   47.49    4.41
  -1   3 -12  758.62   33.76
  -1   3 -12  757.26   33.70
   1   3  12  754.41   33.96
  -1  -3 -12  750.23   33.66
  -1   3 -13    4.88    2.58
  -1  -3 -13    5.18    2.80
  -1   3 -13    3.59    2.67
  -1  -3 -14  408.52   18.80
  -1  -3 -14  342.25   24.88
  -1   3 -14  394.46   18.67
   1   3  14  376.04   26.08
  -1   3 -14  383.95   18.42
   1   3  15   22.79    5.89
   1   3  15   25.96    2.96
   1   3  15   24.20    2.74
  -1  -3 -15   26.88    3.64
  -1  -3 -15   24.81    6.38
  -1   3 -15   28.40    3.35
  -1   3 -15   24.92    3.51
  -1   3 -16  206.60   10.84
  -1  -3 -16  212.58   10.96
  -1   3 -16  196.95   10.50
  -1   3 -17   20.85    3.22
  -1   3 -17   22.43    2.91
  -1  -3 -17   27.36    3.23
  -1  -3 -18   98.82    5.97
   1   3  19   56.49    3.39
   1   3  21   35.37    1.99
  -1   4  17    2.34    1.19
  -1   4  16  164.06    8.36
  -1   4  15   18.14    2.16
  -1   4  15   14.39    2.33
  -1   4  14  141.68    7.98
  -1   4  14  137.38    7.61
  -1   4  13   77.53    5.51
   1  -4 -13   96.04    6.06
   1  -4 -12   11.36    2.83
  -1   4  12    7.99    2.38
  -1   4  12    7.21    5.04
  -1   4  11  251.36   13.15
   1  -4 -11  284.17   13.52
  -1   4  11  254.96   12.72
   1  -4 -10  381.60   17.36
  -1   4  10  293.73   24.27
  -1   4  10  356.25   17.17
  -1   4  10  325.30   16.59
  -1   4   9   38.86    8.30
  -1   4   9   32.20    4.00
  -1   4   9   23.65    3.52
   1  -4  -9   24.15    3.74
  -1   4   9   34.29    4.69
  -1   4   8 1442.88   65.50
  -1   4   8 1388.46   57.19
  -1   4   8 1304.19   57.69
   1  -4  -8 1262.21   56.49
  -1   4   8 1272.71   56.28
   1  -4  -7    0.24    2.61
  -1   4   7   -2.47    3.49
  -1   4   7   -0.30    2.59
  -1   4   7    0.88    3.36
  -1   4   7   -0.66    2.25
   1   4  -6  697.93   30.16
  -1   4   6  647.51   30.95
   1   4  -6  661.93   29.89
  -1   4   6  703.94   32.06
  -1   4   6  639.32   35.01
  -1   4   6  678.34   30.06
  -1   4   5  161.51   10.27
  -1   4   5  135.68   11.28
   1   4  -5  116.97    8.37
   1   4  -5  146.02    8.07
   1   4  -5  136.52    8.29
  -1   4   5  153.38    8.11
  -1   4   4  292.62   14.08
   1   4  -4  286.48   14.52
   1   4  -4  268.05   14.95
  -1   4   4  256.93   16.94
   1   4  -4  308.85   14.10
  -1   4   3    5.20    4.10
   1   4  -3    5.80    2.34
  -1   4   3    4.54    2.49
   1   4  -3    6.14    1.71
   1   4  -3    6.61    2.80
   1   4  -3    5.42    3.49
  -1   4   3    8.84    2.01
  -1   4   3    7.07    2.71
  -1   4   2  505.54   23.39
  -1   4   2  533.15   24.02
  -1   4   2  498.89   26.08
  -1   4   2  509.17   23.50
   1   4  -2  549.28   24.36
   1   4  -2  540.36   25.74
  -1   4   1   31.89    2.82
  -1   4   1   36.42    3.57
   1   4  -1   32.04    5.95
   1   4  -1   35.42    2.70
  -1   4   1   40.66    3.73
   1   4  -1   47.26    4.50
  -1   4   1   31.38    5.56
  -1   4   1   42.18    3.25
  -1   4   0  303.05   15.89
  -1   4   0  300.59   14.18
  -1   4   0  303.86   14.59
  -1   4   0  343.38   17.09
  -1   4   0  292.60   13.81
   1   4   0  318.87   15.34
   1   4   0  297.58   17.42
   1   4   0  288.92   13.91
  -1   4   0  305.14   14.56
  -1   4  -1  386.22   18.18
   1   4   1  351.19   16.41
   1   4   1  287.31   18.57
   1   4   1  346.11   16.94
  -1   4  -1  321.12   17.24
  -1   4  -1  336.27   15.64
  -1   4  -1  342.06   16.01
  -1   4  -1  343.58   16.23
   1   4   2   29.14    3.30
   1   4   2   25.24    5.91
  -1   4  -2   28.91    3.29
  -1   4  -2   24.38    2.43
   1   4   2   22.22    3.98
  -1   4  -2   24.79    2.82
  -1   4  -2   22.24    3.96
  -1   4  -2   22.18    4.19
   1   4   2   27.07    3.95
   1   4   3  574.14   25.18
  -1   4  -3  544.90   25.86
  -1   4  -3  534.06   24.48
  -1   4  -3  592.52   25.24
  -1   4  -3  538.33   24.22
   1   4   3  561.87   28.60
  -1   4  -3  560.01   25.55
   1   4   4  681.93   29.08
  -1   4  -4  599.01   28.83
   1   4   4  707.80   33.39
  -1   4  -4  643.54   29.35
  -1   4  -4  651.84   29.01
   1   4   5   41.43    5.02
   1   4   5   38.72    6.30
   1   4   5   42.74    6.24
   1   4   5   41.77    3.94
   1   4   5   44.76    6.25
   1   4   6 1258.00   52.80
   1   4   6 1279.59   59.39
  -1  -4  -6 1179.93   52.74
   1   4   6 1180.53   55.01
   1   4   6 1245.98   54.15
   1   4   7   22.44    6.07
  -1  -4  -7   21.16    3.42
   1   4   7   17.83    5.17
   1   4   7   19.96    3.27
   1   4   8  564.84   25.92
  -1  -4  -8  569.40   25.68
   1   4   8  532.39   27.31
   1   4   8  562.40   33.61
  -1  -4  -9    1.66    2.49
   1   4   9    1.23    4.56
   1   4   9    5.22    2.73
   1   4   9    1.16    3.61
  -1  -4 -10  210.75   10.62
   1   4  10  193.73   11.64
   1   4  10  174.16   10.70
   1   4  10  158.58   17.43
   1   4  11    1.35    5.79
  -1  -4 -11    2.76    2.33
   1   4  11    1.59    2.48
   1   4  11    0.65    3.12
  -1  -4 -12  186.28    9.95
   1   4  12  173.94   10.50
   1   4  12  191.17   10.11
  -1  -4 -13  115.02    6.77
   1   4  13   99.96    6.50
   1   4  13  107.68    6.67
   1   4  14   16.54    2.47
  -1  -4 -14   22.37    3.05
   1   4  14   17.57    2.45
   1   4  15   74.54    4.78
  -1  -4 -15   82.49    5.23
  -1  -4 -16   15.94    2.39
   1   4  17    8.03    1.55
   1   4  18  159.75    7.61
  -1   5  15   27.71    2.32
  -1   5  15   26.46    2.25
  -1   5  14   37.37    3.01
  -1   5  13   11.03    1.99
  -1   5  13   10.79    2.08
  -1   5  12    1.91    1.86
  -1   5  12    1.81    1.70
  -1   5  11   78.59    5.45
  -1   5  10    5.72    2.09
  -1   5  10    9.90    2.64
  -1   5   9  181.22   10.02
  -1   5   9  175.30   10.13
  -1   5   9  165.63    9.34
  -1   5   8   61.27    5.05
  -1   5   8   67.32    5.42
  -1   5   8   66.47    5.67
  -1   5   7  372.80   18.30
  -1   5   7  392.71   18.66
  -1   5   6   72.05    5.57
  -1   5   6   72.75    5.55
  -1   5   6   89.99    7.51
  -1   5   5 1114.04   48.29
  -1   5   5 1082.65   46.65
   1   5  -5  986.76   47.33
  -1   5   5 1144.72   47.46
  -1   5   5 1129.64   47.39
  -1   5   4   69.56    4.66
  -1   5   4   66.44    4.66
  -1   5   4   80.21    5.28
  -1   5   4   79.28    7.85
   1   5  -4   59.64    5.45
  -1   5   4   77.46    6.05
  -1   5   4   74.15    5.46
   1   5  -4   71.82    5.57
   1   5  -4   68.68    6.10
   1   5  -3  574.86   25.67
   1   5  -3  536.08   26.05
  -1   5   3  579.35   25.48
  -1   5   3  547.61   27.79
   1   5  -3  510.99   26.33
  -1   5   3  549.74   25.82
  -1   5   3  571.12   25.23
   1   5  -2  218.14   11.62
  -1   5   2  252.96   14.85
  -1   5   2  251.30   12.07
  -1   5   2  243.58   12.32
   1   5  -2  239.64   13.61
  -1   5   2  242.85   12.48
   1   5  -2  222.05   13.54
   1   5  -1   42.45    6.02
  -1   5   1   39.12    5.82
   1   5  -1   44.83    5.94
  -1   5   1   51.33    3.89
   1   5  -1   42.39    3.92
  -1   5   1   48.36    4.24
  -1   5   1   42.37    4.22
   1   5   0  207.74   12.71
  -1   5   0  192.00   10.69
  -1   5   0  209.71   10.49
  -1   5   0  227.82   12.69
  -1   5   0  208.64   11.10
   1   5   0  198.56   10.69
   1   5   0  197.50   13.23
   1   5   0  213.11   11.38
   1   5   1   -0.17    1.38
   1   5   1    0.74    2.44
   1   5   1    0.46    2.08
  -1   5  -1   -0.21    1.89
   1   5   1    0.39    3.89
  -1   5  -1   -0.33    3.05
  -1   5  -1    2.25    1.45
  -1   5  -1   -0.48    2.38
   1   5   1    4.71    4.94
   1   5   2   15.00    3.24
   1   5   2   13.11    2.76
  -1   5  -2   15.75    3.32
   1   5   2   10.53    2.14
   1   5   2    8.57    4.07
   1   5   2    9.24    5.34
   1   5   3  228.11   12.37
  -1   5  -3  242.36   12.42
   1   5   3  218.25   11.41
   1   5   3  242.64   15.14
   1   5   3  219.97   12.02
   1   5   4   27.19    3.14
   1   5   4   35.00    4.36
   1   5   5  528.93   24.25
   1   5   6   12.61    4.65
   1   5   6   11.16    2.55
   1   5   7  588.82   27.26
   1   5   7  599.05   28.81
   1   5   8   24.01    3.81
   1   5   8   24.28    4.54
   1   5   8   30.81    3.91
   1   5   9  768.57   33.40
   1   5   9  676.26   32.95
   1   5   9  782.20   34.18
   1   5  10   27.44    4.32
   1   5  10   36.09    3.93
   1   5  11  143.88    8.39
   1   5  11  155.06    8.92
   1   5  12   68.26    4.74
   1   5  13    6.55    1.78
   1   5  13    8.45    1.65
   1   5  14   90.58    5.13
   1   5  15   25.62    2.20
  -1   6  11  171.13    8.45
  -1   6  10   14.00    2.09
  -1   6   9   86.32    5.42
  -1   6   8   88.02    5.24
  -1   6   8   71.69    4.67
  -1   6   7    1.12    2.12
  -1   6   7    3.29    2.01
  -1   6   7    6.26    1.84
  -1   6   6  132.06    7.77
  -1   6   6  146.68    7.72
  -1   6   6  146.02    8.34
  -1   6   5   21.83    3.01
  -1   6   5   15.73    2.40
  -1   6   5   20.17    3.08
  -1   6   4  153.17    8.36
  -1   6   4  148.90    7.84
  -1   6   4  144.66    8.41
  -1   6   3  170.45    9.22
  -1   6   2   27.12    3.24
  -1   6   1  204.16   10.69
   1   6   0   37.89    3.88
   1   6   0   36.15    4.40
   1   6   1  352.18   16.19
   1   6   1  323.27   17.22
   1   6   1  323.19   15.52
   1   6   2  108.78    6.61
   1   6   2   98.61    8.07
   1   6   2   98.82    6.21
   1   6   3  196.62   10.38
   1   6   3  217.04   10.66
   1   6   4   15.76    4.22
   1   6   4   10.17    2.51
   1   6   4   19.33    2.96
   1   6   5  106.80    7.76
   1   6   5   97.16    6.12
   1   6   6   29.47    3.40
   1   6   6   28.45    3.58
   1   6   7    2.49    2.12
   1   6   7   -0.20    2.02
   1   6   8  115.51    6.61
   1   6   8  124.30    6.93
   1   6   9   54.94    3.78
   1   6   9   43.58    3.54
   1   6  10  171.98    8.12
   1   6  10  161.48    7.68
   1   6  11   54.11    3.46
   2   0 -22  145.53    7.40
   2   0 -22  162.72    7.54
   2   0 -21    2.02    1.57
   2   0 -20    6.30    2.13
   2   0 -19   -0.38    2.15
   2   0 -18  199.10   16.78
  -2   0  18  225.89   17.24
   2   0 -18  240.71   11.87
  -2   0  17   -7.94    4.48
   2   0 -17   -1.11    2.71
   2   0 -17   -2.78    3.67
   2   0 -16  463.05   29.29
  -2   0  16  503.05   29.69
   2   0 -16  516.52   23.30
  -2   0  15    3.54    4.58
   2   0 -15    0.92    3.95
   2   0 -15    0.22    2.34
  -2   0  14  226.97   17.34
   2   0 -14  218.06   17.17
   2   0 -14  234.45   11.85
   2   0 -13   -1.75    4.19
   2   0 -13    0.61    2.45
   2   0 -13   -1.17    2.13
  -2   0  13    0.84    4.64
   2   0 -12  859.28   37.52
   2   0 -12  860.08   37.60
  -2   0  12  872.29   44.25
   2   0 -11    0.80    4.46
   2   0 -11    1.84    2.19
  -2   0  11    3.18    4.70
   2   0 -11   -0.19    2.36
   2   0 -10 2932.26  126.65
   2   0 -10 2886.74  119.91
  -2   0  10 2859.51  126.58
   2   0 -10 2845.83  119.90
   2   0  -9   -0.74    5.02
   2   0  -9    0.18    2.26
   2   0  -9   -1.74    2.49
  -2   0   9    5.73    5.27
   2   0  -8  889.03   45.93
   2   0  -8 1012.16   43.27
  -2   0   8  895.80   45.64
  -2   0   7    6.45    4.34
   2   0  -7    2.29    4.82
   2   0  -7   -0.67    2.89
   2   0  -6  955.22   43.85
  -2   0   6 1046.26   45.72
  -2   0   5    2.91    3.35
   2   0  -5    0.23    2.55
  -2   0   4  902.34   39.91
  -2   0   3    1.22    2.67
  -2   0   2  130.62    7.37
  -2   0   1    1.23    1.99
   2   0   0  796.41   33.73
  -2   0   0  769.98   33.69
   2   0   1    1.48    1.92
   2   0   2  968.57   41.41
   2   0   3    1.32    2.01
  -2   0  -3    0.79    2.68
   2   0   4 5003.57  210.13
  -2   0  -4 5140.60  210.65
  -2   0  -5    1.27    3.43
  -2   0  -6  643.07   31.16
  -2   0  -7    0.45    3.58
  -2   0  -7   -1.12    5.23
  -2   0  -8   13.72    3.26
  -2   0  -8   21.38    3.16
  -2   0  -8   16.33    4.51
  -2   0  -8   16.76    6.47
  -2   0  -9   -2.19    3.83
  -2   0  -9    1.69    2.27
  -2   0  -9   -0.77    5.84
  -2   0  -9   -0.52    2.84
  -2   0 -10  472.81   27.75
  -2   0 -10  525.27   26.47
  -2   0 -10  466.95   21.75
  -2   0 -11   -0.38    2.69
  -2   0 -11   -2.05    3.88
  -2   0 -11   -0.34    2.03
  -2   0 -12  841.95   36.59
  -2   0 -12  880.86   42.80
  -2   0 -12  824.20   36.35
  -2   0 -13    0.83    3.97
   2   0  13    1.34    2.95
  -2   0 -13   -1.28    2.02
  -2   0 -13    1.59    2.64
   2   0  14  510.79   28.84
  -2   0 -14  537.79   24.63
  -2   0 -14  553.29   24.40
  -2   0 -15   -0.39    2.03
   2   0  15   -0.69    2.72
  -2   0 -15   -1.55    2.82
  -2   0 -16  104.13    6.52
  -2   0 -16  110.20    7.18
  -2   0 -17    2.31    3.07
  -2   0 -17    7.23    1.86
  -2   0 -18  548.28   24.42
  -2   0 -18  526.37   23.83
  -2   0 -19    1.33    2.12
  -2   0 -20   17.16    2.65
  -2   0 -21    0.26    1.61
   2   1 -22   21.14    2.07
   2  -1 -22   22.94    1.96
   2  -1 -21   22.39    2.36
   2   1 -21   28.22    2.68
   2  -1 -21   22.04    2.25
   2   1 -21   24.26    2.60
   2   1 -20   44.46    3.80
   2  -1 -20   49.12    3.72
   2   1 -20   47.47    3.93
   2   1 -19   23.41    3.25
   2   1 -19   23.06    3.16
   2  -1 -18  212.41   11.04
   2   1 -18  224.71   11.85
  -2  -1  18  227.22   16.77
  -2   1  18  196.97   15.92
   2   1 -18  257.12   11.99
   2   1 -17    5.77    2.85
   2  -1 -17    6.54    2.34
   2   1 -17   15.66    4.69
  -2  -1  17   10.14    4.67
   2   1 -17    6.44    2.60
  -2   1  17    8.34    4.74
   2   1 -16  558.52   26.32
   2   1 -16  565.74   32.25
   2  -1 -16  584.20   25.72
  -2  -1  16  579.92   32.38
  -2   1  16  584.51   32.52
   2   1 -15  236.70   12.52
  -2   1  15  231.23   17.39
  -2  -1  15  241.16   17.79
   2  -1 -15  243.10   11.92
   2  -1 -15  240.42   12.34
   2   1 -15  210.30   16.79
  -2  -1  14  202.25   16.12
   2  -1 -14  194.85   16.42
   2  -1 -14  203.89   10.59
   2   1 -14  213.63   11.37
   2   1 -14  225.66   16.10
   2  -1 -14  202.30   10.99
  -2   1  14  217.25   16.28
   2   1 -13  932.67   40.62
   2  -1 -13  915.65   40.29
   2  -1 -13  879.70   47.14
   2  -1 -13  947.51   39.98
   2  -1 -13  910.57   44.16
   2   1 -13  895.76   45.74
  -2  -1  13  913.60   46.87
  -2   1  13  902.89   46.57
  -2   1  12   38.64    7.10
   2  -1 -12   35.30    5.36
   2  -1 -12   37.02    3.52
   2   1 -12   33.39    6.25
   2   1 -12   31.90    4.08
  -2  -1  12   49.04    8.09
   2  -1 -11  339.33   20.19
   2  -1 -11  368.65   22.45
   2   1 -11  382.86   23.00
   2   1 -11  381.99   18.06
   2  -1 -11  379.13   17.22
  -2   1  11  351.73   22.80
  -2  -1  11  380.06   23.73
  -2  -1  10  263.57   18.55
   2   1 -10  263.71   17.61
   2   1 -10  253.90   13.20
  -2   1  10  214.97   16.85
   2  -1 -10  248.44   15.35
   2  -1 -10  265.91   12.40
   2  -1 -10  262.05   17.36
   2  -1  -9  988.90   44.29
   2  -1  -9  917.96   41.28
   2   1  -9  827.51   38.56
  -2  -1   9  879.54   44.82
  -2   1   9  822.14   43.17
   2   1  -9  967.33   44.44
  -2  -1   8  334.28   20.70
   2  -1  -8  361.71   15.68
   2   1  -8  314.19   20.04
   2  -1  -8  309.99   19.80
   2   1  -8  298.21   15.58
  -2   1   8  327.48   19.55
   2  -1  -7  829.35   43.81
   2   1  -7  885.77   44.43
   2   1  -7 1002.28   40.15
  -2   1   7 1042.30   44.24
   2  -1  -7  832.38   39.90
  -2  -1   7 1109.87   45.76
  -2  -1   6  203.21   12.71
  -2   1   6  181.88   11.81
  -2   1   5    2.41    3.12
  -2  -1   5    8.30    3.53
  -2   1   4 3290.59  141.40
  -2  -1   4 3478.64  141.66
  -2   1   3 4529.00  188.11
  -2  -1   3 4528.60  188.16
  -2   1   2 5206.53  215.24
  -2  -1   2 5196.15  215.29
  -2  -1   1 1423.26   60.92
  -2   1   1 1470.90   60.99
  -2  -1   0  481.94   21.58
   2  -1   0  474.30   21.52
  -2   1   0  519.42   21.75
   2   1   0  483.38   21.60
   2  -1   1 1794.07   74.22
   2   1   1 1745.03   74.16
  -2  -1  -2  568.24   26.19
  -2   1  -2  614.46   26.35
  -2   1  -3  890.81   38.04
  -2  -1  -3  870.73   37.96
   2  -1   3  856.77   36.37
   2   1   3  861.51   38.66
   2   1   4 1009.13   46.13
  -2  -1  -4 1023.27   45.48
  -2   1  -4 1074.35   45.67
  -2  -1  -5 1518.57   64.81
   2  -1   5 1453.82   62.06
   2   1   5 1447.49   65.27
  -2   1  -5 1572.35   65.02
   2  -1   6  336.14   15.98
  -2  -1  -6  360.70   19.41
  -2   1  -6  366.69   19.59
  -2  -1  -7   23.11    6.44
   2  -1   7   25.64    3.15
  -2   1  -7   26.13    6.60
   2  -1   8  320.46   16.77
  -2  -1  -8  329.21   15.33
  -2  -1  -8  296.11   20.78
  -2   1  -8  342.17   20.81
  -2   1  -8  327.53   15.36
  -2  -1  -8  354.68   20.96
   2  -1   9  123.29    9.32
  -2  -1  -9  155.09   12.84
  -2   1  -9  141.58    7.86
  -2   1  -9  160.59   13.08
  -2  -1  -9  144.04    7.90
  -2  -1 -10  808.96   40.45
  -2   1 -10  776.59   34.05
  -2   1 -10  770.18   33.29
  -2  -1 -10  787.15   34.07
   2  -1  10  810.91   36.99
  -2   1 -11  349.78   16.34
  -2  -1 -11  398.58   23.15
  -2   1 -11  392.04   17.46
  -2  -1 -12  425.02   19.58
  -2  -1 -12  429.40   19.05
  -2   1 -12  426.96   19.48
  -2   1 -12  387.60   18.44
  -2   1 -13  439.40   20.82
  -2  -1 -13  467.28   27.71
  -2  -1 -13  464.87   21.32
  -2  -1 -13  517.47   22.10
  -2   1 -13  492.67   21.93
   2   1  13  492.98   28.28
  -2  -1 -14   41.16    7.63
  -2  -1 -14   27.32    3.66
  -2   1 -14   26.77    3.92
  -2  -1 -14   32.34    3.57
   2   1  14   28.96    6.31
  -2  -1 -15  820.33   42.15
  -2  -1 -15  781.78   34.88
  -2   1 -15  798.21   35.16
  -2  -1 -15  776.93   34.62
   2   1  15  806.26   41.57
  -2  -1 -16  132.17   12.99
  -2  -1 -16  147.47    8.26
   2   1  16  134.44   12.53
  -2   1 -16  138.98    8.71
  -2  -1 -16  141.49    8.28
  -2   1 -17  217.23   11.40
   2   1  17  186.29   15.26
  -2   1 -17  213.34   11.23
  -2  -1 -17  196.74   10.68
  -2   1 -18  331.87   15.58
  -2  -1 -18  317.18   14.97
  -2  -1 -18  296.83   14.87
  -2  -1 -19   23.14    2.78
  -2   1 -19   25.32    3.39
  -2  -1 -19   27.23    3.00
  -2   1 -20  138.20    7.55
  -2  -1 -20  134.33    7.16
  -2  -1 -21   15.67    1.95
  -2   1 -21   13.89    2.16
  -2   1 -22   46.58    3.13
   2  -2 -21  141.30    6.87
   2  -2 -20   16.28    2.13
   2   2 -19  427.86   19.57
   2   2 -18   50.51    4.24
   2   2 -17  337.60   16.21
  -2   2  16    6.04    5.89
   2   2 -16   19.97    3.75
  -2  -2  16    7.23    6.17
   2  -2 -16   28.54    6.50
  -2   2  16   19.06    2.34
   2   2 -16   27.86    3.38
   2   2 -15  141.66    8.17
   2   2 -15  138.74    8.69
   2  -2 -15  123.30   12.80
  -2  -2  15  107.26   11.73
  -2   2  15  120.14   11.70
   2  -2 -15  146.33    8.42
  -2  -2  14   69.71    9.12
   2   2 -14   65.83    5.36
   2  -2 -14   85.11    5.76
   2  -2 -14   60.65    8.61
  -2   2  14   52.78    8.00
   2  -2 -13    3.85    3.32
  -2   2  13    7.23    4.56
   2   2 -13    1.76    2.52
   2  -2 -13    7.06    4.32
   2   2 -13    3.89    2.81
   2  -2 -13    6.92    2.73
  -2  -2  13    0.89    4.42
   2   2 -12   95.11    6.33
   2   2 -12   72.68    7.60
   2  -2 -12   97.15    6.16
  -2  -2  12   92.64   10.94
   2  -2 -12   85.12    9.84
  -2   2  12   76.41    5.04
  -2   2  12   80.45    9.44
   2  -2 -12   74.44    8.36
   2  -2 -11   73.98    8.79
   2  -2 -11  110.51    6.53
  -2  -2  11  108.38   11.86
   2   2 -11   74.80    7.66
   2  -2 -11   91.50   10.10
   2   2 -11   99.88    6.75
  -2   2  11   94.47    5.60
  -2   2  11   83.85    9.89
   2   2 -10    7.78    2.78
   2  -2 -10    8.16    2.71
  -2   2  10   11.65    2.10
  -2   2  10   11.19    4.76
   2   2 -10    8.71    3.11
  -2  -2  10   12.66    5.64
   2   2  -9  848.52   37.14
   2   2  -9  891.39   41.43
  -2  -2   9  750.62   42.48
   2   2  -9  685.32   37.29
  -2   2   9  919.91   36.75
   2   2  -9  868.12   37.58
   2   2  -9  824.71   39.26
  -2   2   9  876.64   41.47
   2  -2  -9  904.66   37.34
  -2   2   8    5.51    3.66
   2   2  -8    5.45    2.47
  -2   2   8    5.02    1.97
  -2  -2   8    2.67    4.10
   2  -2  -8    7.61    3.97
   2  -2  -8    4.47    2.61
   2   2  -8    2.80    3.99
   2   2  -8    0.82    2.48
   2   2  -8    3.02    3.10
   2  -2  -7 1062.70   47.82
   2   2  -7 1023.13   43.67
   2   2  -7 1101.21   44.30
  -2   2   7 1039.40   44.33
  -2   2   7 1018.74   46.34
   2   2  -7 1003.94   47.58
  -2   2   7 1113.32   44.14
  -2  -2   7 1108.14   48.07
   2   2  -7 1024.50   43.89
  -2   2   6    9.04    3.08
  -2   2   6    6.72    2.65
   2   2  -6    5.55    1.89
   2  -2  -6    5.04    2.53
   2   2  -6    7.78    2.17
   2   2  -6    4.41    4.27
  -2  -2   6    7.03    3.28
   2   2  -6    5.33    2.46
   2  -2  -6   13.66    4.62
   2   2  -5  936.01   40.40
   2   2  -5  813.77   43.13
   2  -2  -5  793.95   43.14
   2   2  -5  952.56   40.31
  -2   2   5  967.06   41.89
  -2  -2   5  961.46   42.21
  -2   2   5 1110.80   41.80
   2  -2  -4  164.55   10.44
  -2   2   4  167.40    9.05
   2   2  -4  161.39   10.41
  -2  -2   4  151.63    9.00
  -2   2   3  767.80   33.10
  -2  -2   3  744.06   33.14
  -2   2   2   14.36    2.20
  -2  -2   2   15.37    2.41
   2   2  -1 1009.99   44.65
   2   2   0  141.57    8.77
  -2  -2  -1    1.31    1.75
   2   2   1    0.30    2.71
   2  -2   1    3.13    1.54
   2   2   1    1.90    1.47
  -2   2  -1    4.22    1.98
  -2  -2  -2 1788.16   77.46
   2  -2   2 1822.96   77.25
   2   2   2 1953.68   79.89
   2   2   2 1836.71   77.24
  -2   2  -2 1871.10   77.63
  -2  -2  -3  606.10   28.32
   2   2   3  611.34   29.89
  -2   2  -3  644.56   28.46
  -2  -2  -4  191.09   11.90
  -2   2  -4  197.01   11.97
  -2  -2  -5 2108.03  103.96
  -2   2  -5 2032.61  103.65
   2   2   6   86.89    5.04
  -2   2  -6   75.29    8.22
  -2   2  -6   74.36    4.96
  -2  -2  -6   69.03    7.99
  -2   2  -7 1305.50   59.25
  -2   2  -7 1252.58   55.08
  -2  -2  -7 1403.61   59.96
   2   2   7 1263.74   54.98
  -2   2  -8   60.07    4.92
   2   2   8   68.97    9.38
   2   2   8   63.75    4.66
   2   2   8   69.92    5.37
  -2   2  -8   54.46    4.19
  -2   2  -9  891.68   37.76
   2   2   9  831.18   38.04
  -2   2  -9  891.42   37.27
  -2   2 -10   34.90    3.56
   2   2  10   25.35    7.03
   2   2  10   23.01    3.77
  -2   2 -11  471.48   22.80
  -2  -2 -11  550.39   23.62
   2   2  11  496.19   31.24
  -2  -2 -12   27.91    3.79
  -2  -2 -12   29.01    6.96
  -2   2 -12   30.55    3.85
   2   2  12   35.38    7.82
  -2  -2 -13  127.96   12.97
   2   2  13  138.64   14.18
  -2  -2 -13  145.93    8.42
  -2   2 -13  120.35    7.99
  -2   2 -14  405.50   19.59
   2   2  14  405.73   26.60
  -2  -2 -14  402.57   25.81
  -2   2 -14  411.92   19.41
   2   2  15   -3.05    3.91
  -2  -2 -15   -1.87    5.23
  -2   2 -15    0.16    1.52
  -2   2 -15    3.92    2.92
  -2  -2 -16  144.63   13.39
  -2   2 -16  141.78    7.97
   2   2  16  159.29   14.51
  -2   2 -16  181.31    9.42
  -2  -2 -17   42.80    7.21
  -2   2 -17   49.54    4.54
  -2  -2 -17   42.28    4.08
  -2  -2 -18    3.27    2.03
  -2   2 -18    5.54    2.68
  -2   2 -19  320.11   15.04
  -2  -2 -19  293.41   14.56
  -2   2 -19  327.34   14.72
  -2   2 -20    0.61    1.73
  -2   2 -20    1.14    1.54
  -2  -2 -20    3.04    1.56
   2   2  22    5.84    0.95
   2  -3 -19   18.00    1.86
   2   3 -19   18.08    2.57
   2   3 -18  261.91   12.90
  -2   3  17    0.42    1.28
   2   3 -17   -1.50    2.33
  -2   3  16   47.11    3.78
   2   3 -16   57.48    4.93
   2   3 -15   20.38    3.50
   2  -3 -15   13.48    4.95
  -2   3  15   12.70    2.32
   2   3 -14   67.72    5.74
   2  -3 -14   46.94    7.77
   2  -3 -14   70.23    5.27
  -2   3  14   54.47    4.20
  -2   3  13  126.95    7.31
   2  -3 -13  142.09    8.23
   2   3 -13  143.90    8.46
   2   3 -13  126.26    8.70
   2  -3 -12    0.25    2.57
   2   3 -12   -1.73    3.05
   2   3 -12    0.67    3.40
  -2   3  12    2.99    1.79
   2  -3 -12    0.84    3.61
   2  -3 -11  249.51   18.05
   2   3 -11  221.98   13.44
   2  -3 -11  299.80   13.76
  -2   3  11  286.19   13.14
   2   3 -11  223.65   14.04
   2  -3 -10  107.72   10.89
  -2   3  10  108.54    6.81
   2   3 -10   95.40    7.35
   2  -3 -10  130.63    7.53
   2   3 -10  110.39    8.04
   2   3  -9  230.19   12.41
   2  -3  -9  205.55   11.65
   2  -3  -9  238.11   16.71
  -2   3   9  225.91   11.56
   2   3  -8  393.72   18.42
  -2   3   8  367.15   17.22
   2  -3  -8  322.54   17.66
  -2   3   8  442.51   19.01
   2   3  -8  368.97   17.19
  -2   3   8  394.77   18.09
   2  -3  -8  358.35   22.63
   2   3  -7    4.01    2.62
  -2   3   7    4.11    1.83
  -2   3   7    4.53    2.39
   2  -3  -7    1.27    2.43
   2  -3  -7    3.00    4.01
  -2   3   7    0.28    2.79
   2   3  -6 2170.18   92.35
   2  -3  -6 2309.97   92.21
  -2   3   6 2279.91   93.55
  -2   3   6 2204.14   91.76
  -2   3   6 2038.48   92.69
   2  -3  -6 2052.75   97.62
   2   3  -6 2201.91   91.72
   2   3  -5    0.97    1.70
  -2   3   5    0.30    3.15
  -2   3   5    1.54    1.72
   2  -3  -5    0.91    1.80
  -2   3   5   -1.66    2.39
   2   3  -5   -0.19    2.21
   2  -3  -5    0.68    3.62
  -2   3   4 1415.27   61.63
   2   3  -4 1453.05   62.27
  -2   3   4 1538.19   62.78
   2   3  -4 1438.35   61.64
  -2   3   4 1591.62   64.06
   2   3  -3   99.13    5.59
   2   3  -3   99.34    6.15
  -2   3   3  101.20    5.79
   2   3  -2  310.18   14.60
   2   3  -2  302.57   14.12
  -2   3   2  307.35   14.24
  -2   3   2  318.32   14.66
  -2   3   2  289.55   16.25
  -2   3   1  234.58   10.63
   2   3  -1  199.32   12.52
  -2   3   1  203.59   10.37
  -2   3   1  228.57   12.59
   2   3  -1  214.63   10.50
  -2   3   1  227.65   10.80
   2   3  -1  216.99   10.88
  -2   3   1  216.42   11.89
  -2   3   0   13.63    3.72
  -2   3   0   11.40    1.68
  -2   3   0    8.26    2.07
  -2   3   0    8.67    1.75
   2   3   0    8.39    2.35
  -2   3   0    9.50    1.77
   2   3   0    9.94    2.03
  -2   3   0   11.78    1.57
   2   3   0   15.64    3.60
  -2   3   0   13.75    2.15
  -2   3  -1  913.69   38.74
  -2   3  -1  862.68   37.38
  -2   3  -1  856.14   37.26
  -2   3  -1  890.82   37.58
   2   3   1  908.01   40.84
  -2   3  -1  873.14   37.54
  -2   3  -2   52.09    4.54
  -2   3  -2   51.34    3.46
   2   3   2   51.74    6.09
  -2   3  -2   54.01    3.52
  -2   3  -2   56.21    3.90
   2   3   2   48.89    4.18
  -2   3  -2   50.35    3.67
  -2   3  -3  691.74   29.68
   2   3   3  692.35   30.05
   2   3   3  689.91   34.20
  -2   3  -3  656.02   30.06
  -2   3  -3  664.19   29.49
  -2   3  -3  683.52   29.95
  -2   3  -3  712.33   29.63
   2   3   3  728.78   33.99
   2   3   3  701.47   30.31
   2   3   4  123.08   10.16
  -2   3  -4  124.44    7.03
  -2   3  -4  125.92    6.49
  -2   3  -4  126.63    6.44
   2   3   4  121.64    7.26
  -2   3  -5   87.32    5.79
   2   3   5  115.20    9.95
   2   3   5  118.37    6.59
  -2   3  -5   79.16    5.71
  -2   3  -5  104.86    5.45
   2   3   6  787.25   32.01
  -2   3  -6  681.59   29.75
   2   3   6  672.23   30.42
   2   3   6  736.23   36.44
  -2   3  -6  739.69   29.76
  -2   3  -6  638.77   29.36
  -2   3  -6  627.52   29.80
   2   3   7  118.48    7.33
  -2   3  -7   95.29    6.36
   2   3   7  113.19    8.08
  -2   3  -7  101.51    6.52
  -2   3  -7  108.30    6.44
  -2   3  -8 1689.76   68.56
  -2   3  -8 1459.78   68.85
   2   3   8 1667.09   69.85
  -2   3  -8 1627.58   68.71
   2   3   8 1668.80   70.83
  -2   3  -9    3.31    2.74
  -2   3  -9    0.36    2.46
  -2   3  -9    1.43    2.03
  -2  -3  -9    4.40    2.66
   2   3   9    2.86    3.47
  -2   3 -10  294.50   15.97
  -2   3 -10  331.42   16.14
   2   3  10  342.10   17.83
  -2   3 -10  385.18   16.75
  -2  -3 -10  370.60   16.84
  -2   3 -11  270.93   13.17
  -2   3 -11  262.65   13.04
  -2   3 -11  235.39   12.79
  -2  -3 -11  253.57   13.29
   2   3  11  270.45   14.18
  -2   3 -12   28.06    3.58
   2   3  12   32.63    4.16
   2   3  12   32.73    8.13
  -2   3 -12   22.35    3.54
  -2   3 -12   24.84    3.75
  -2  -3 -12   34.75    3.97
  -2  -3 -13  423.84   20.69
  -2   3 -13  444.48   20.51
   2   3  13  455.39   29.71
  -2   3 -13  440.73   20.34
  -2   3 -14    9.89    2.48
  -2  -3 -14   17.60    3.32
  -2  -3 -14   13.76    5.68
   2   3  14   21.63    6.39
  -2   3 -14   11.03    2.87
  -2   3 -15  308.32   15.08
  -2  -3 -15  291.34   21.64
  -2  -3 -15  336.27   15.83
   2   3  15  327.63   22.74
  -2   3 -15  321.24   15.55
  -2  -3 -16   -0.22    2.28
  -2   3 -16   -0.21    2.39
  -2   3 -16   -0.84    1.91
   2   3  16    0.81    1.55
  -2   3 -17   46.45    4.05
   2   3  17   39.75    3.23
  -2   3 -18   57.60    4.50
  -2  -3 -18   65.97    4.46
  -2  -3 -19    2.24    1.60
   2   3  20  256.23   11.36
  -2   4  18    6.95    1.23
  -2   4  17   36.90    2.64
  -2   4  16   43.51    3.23
  -2   4  15   60.36    4.22
  -2   4  14  461.21   21.16
  -2   4  13   25.13    3.02
  -2   4  13   27.10    3.26
  -2   4  12  847.45   37.98
  -2   4  12  883.36   38.60
  -2   4  12  912.22   48.01
  -2   4  11    0.57    2.33
  -2   4  11    0.23    2.07
  -2   4  11    1.21    4.63
  -2   4  10  501.91   23.79
  -2   4  10  523.18   23.28
  -2   4   9  352.50   25.16
  -2   4   9  387.71   18.07
  -2   4   9  340.28   18.15
  -2   4   8  112.98   12.07
  -2   4   8  117.18    7.59
  -2   4   8  105.65    7.40
   2   4  -8   96.03    6.20
   2   4  -7  108.22    6.93
  -2   4   7  118.80    7.92
  -2   4   6   86.59    7.27
   2   4  -6   84.21    5.68
  -2   4   6   77.32    6.48
   2   4  -6   82.19    5.92
  -2   4   6   87.39    9.14
  -2   4   5   10.02    2.46
   2   4  -5    7.77    2.32
  -2   4   5   12.21    3.77
  -2   4   5    9.41    2.53
   2   4  -5   11.18    3.38
  -2   4   5   13.86    4.37
   2   4  -5   12.69    2.99
  -2   4   4   24.53    3.01
  -2   4   4   33.38    3.19
   2   4  -4   27.61    3.17
   2   4  -4   20.48    4.17
   2   4  -4   22.39    3.70
  -2   4   4   29.24    4.47
   2   4  -3  421.59   19.57
  -2   4   3  434.23   22.14
  -2   4   3  405.71   19.45
  -2   4   3  412.13   19.60
   2   4  -3  418.37   20.34
  -2   4   3  450.23   20.45
   2   4  -3  453.22   21.50
   2   4  -2  653.24   29.26
   2   4  -2  670.07   30.09
  -2   4   2  624.07   29.09
   2   4  -2  716.96   31.70
  -2   4   2  668.27   29.27
  -2   4   2  655.90   31.73
  -2   4   2  663.65   29.71
  -2   4   2  658.95   28.95
  -2   4   1  458.21   21.08
  -2   4   1  465.41   21.07
  -2   4   1  447.64   20.68
  -2   4   1  451.71   20.60
   2   4  -1  499.75   23.99
  -2   4   1  476.35   23.33
  -2   4   1  469.60   21.38
   2   4  -1  465.75   21.95
  -2   4   0 1273.78   55.78
  -2   4   0 1289.17   55.97
  -2   4   0 1380.79   58.37
  -2   4   0 1296.35   56.42
  -2   4   0 1352.46   56.38
  -2   4   0 1366.23   56.61
   2   4   0 1317.18   59.55
   2   4   0 1385.53   57.34
  -2   4  -1   51.16    3.73
  -2   4  -1   53.09    3.97
  -2   4  -1   54.71    4.18
  -2   4  -1   59.02    4.50
   2   4   1   51.84    7.19
  -2   4  -1   54.37    5.33
   2   4   1   60.10    5.14
   2   4   1   44.95    5.91
   2   4   2 1052.42   45.57
  -2   4  -2  969.27   42.15
  -2   4  -2  940.95   41.36
  -2   4  -2  969.84   41.63
   2   4   2  960.90   46.05
  -2   4  -2  982.27   41.88
  -2   4  -3  110.46    6.14
  -2   4  -3  117.35    6.99
   2   4   3  113.73    6.85
  -2   4  -3   98.47    5.89
   2   4   3  116.03   10.18
   2   4   4  457.08   21.43
  -2   4  -4  440.29   20.56
   2   4   4  474.94   24.28
   2   4   4  494.37   26.43
   2   4   4  496.86   22.48
   2   4   5   81.25    6.78
   2   4   5   87.15    9.44
   2   4   5   73.41    7.75
   2   4   5   95.23    6.14
   2   4   6   80.76    8.29
   2   4   6   88.73    6.26
  -2  -4  -6   92.67    6.44
   2   4   6   79.99    7.07
   2   4   6   92.53    9.91
   2   4   7   50.50    5.74
   2   4   7   46.79    8.37
   2   4   7   53.00    6.92
   2   4   7   54.50    8.23
   2   4   7   63.48    5.26
   2   4   8   33.97    7.48
   2   4   8   28.25    5.69
   2   4   8   32.52    4.16
  -2  -4  -8   32.63    3.89
   2   4   9  213.75   19.68
  -2  -4  -9  228.12   11.97
   2   4   9  213.48   13.73
   2   4   9  241.95   12.76
   2   4  10   93.57   13.27
   2   4  10  117.71    8.54
   2   4  10   97.32    7.46
  -2  -4 -10  116.18    7.07
   2   4  11  282.14   14.59
  -2  -4 -11  281.54   13.91
   2   4  11  297.26   15.26
   2   4  12  345.60   17.36
   2   4  12  360.39   17.24
   2   4  12  305.21   24.98
  -2  -4 -12  342.79   16.64
  -2  -4 -13    2.67    2.19
   2   4  13    3.34    2.39
  -2  -4 -14  543.50   23.78
   2   4  14  540.41   23.63
   2   4  14  494.86   23.55
   2   4  15    1.68    1.49
   2   4  15    2.10    1.48
  -2  -4 -15    1.19    1.88
  -2  -4 -16  234.56   11.28
  -2  -4 -17   39.82    2.98
  -2   5  15   87.02    4.86
  -2   5  15   97.98    5.04
  -2   5  15   90.70    4.92
  -2   5  14    2.68    1.24
  -2   5  14    1.83    1.36
  -2   5  13  220.55   10.76
  -2   5  13  214.50   10.81
  -2   5  12    2.83    1.77
  -2   5  11  301.15   14.38
  -2   5  11  290.26   14.65
  -2   5  10    0.23    2.04
  -2   5   9  332.99   16.50
  -2   5   8  136.99    8.33
  -2   5   8  148.29    8.60
  -2   5   8  117.86    7.42
  -2   5   7   61.51    4.97
  -2   5   7   55.40    4.31
  -2   5   7   60.52    5.49
  -2   5   6   52.37    4.16
  -2   5   6   50.90    4.57
  -2   5   6   56.54    4.27
  -2   5   6   61.54    4.75
   2   5  -6   42.80    4.43
  -2   5   5   75.14    5.30
   2   5  -5   73.77    5.40
  -2   5   5   74.53    5.25
  -2   5   5   68.87    4.81
  -2   5   5   67.18    4.76
   2   5  -5   53.02    5.30
   2   5  -4   34.16    4.64
   2   5  -4   47.35    5.06
  -2   5   4   36.52    3.39
  -2   5   4   41.32    3.64
  -2   5   4   47.09    3.95
   2   5  -4   47.13    4.44
  -2   5   4   45.93    4.61
  -2   5   4   34.97    3.96
  -2   5   3  225.92   10.93
  -2   5   3  232.55   11.41
   2   5  -3  225.28   11.56
  -2   5   3  203.27   10.66
  -2   5   3  228.37   12.01
  -2   5   3  209.11   11.25
   2   5  -3  223.07   12.62
   2   5  -2    4.61    2.48
   2   5  -2    4.35    3.55
  -2   5   2    1.60    1.50
  -2   5   2    0.22    2.29
  -2   5   2    5.52    1.95
  -2   5   2    4.61    2.29
   2   5  -2    2.51    1.56
   2   5  -2    2.06    3.62
   2   5  -1  427.07   21.43
   2   5  -1  400.90   22.20
   2   5  -1  464.91   20.36
  -2   5   1  435.38   19.74
   2   5  -1  394.95   19.39
  -2   5   1  427.19   19.97
  -2   5   1  407.49   19.78
   2   5   0  140.41    8.42
  -2   5   0  159.62    8.92
  -2   5   0  158.92    8.49
   2   5   0  145.69   11.64
   2   5   0  159.86   10.32
  -2   5   0  147.99    8.58
  -2   5  -1  553.75   24.23
   2   5   1  489.33   27.97
  -2   5  -1  526.69   24.78
   2   5   1  549.07   26.25
  -2   5  -2    4.01    1.55
   2   5   2    5.37    5.75
   2   5   2    2.52    2.71
   2   5   2    2.58    1.53
   2   5   2    3.74    3.73
   2   5   3  283.95   17.76
   2   5   3  279.63   13.58
   2   5   4   41.18    3.68
   2   5   5  464.22   22.01
   2   5   6  147.82    8.96
   2   5   6  142.36   10.76
   2   5   7   74.76    7.39
   2   5   7   70.43    5.81
   2   5   8   40.37    4.56
   2   5   8   33.19    5.17
   2   5   9   45.58    5.38
   2   5   9   45.58    4.71
   2   5  10   10.70    2.87
   2   5  10    7.98    3.27
   2   5  10   11.34    2.78
   2   5  11  242.36   12.09
   2   5  11  222.63   12.41
   2   5  11  236.15   11.93
   2   5  12    8.80    2.15
   2   5  12    6.86    2.05
   2   5  13  223.53   11.04
   2   5  13  222.48   10.83
   2   5  14    0.53    1.07
   2   5  14    0.24    1.20
  -2   6  11   21.42    2.09
  -2   6  10   85.35    5.12
  -2   6   9   58.86    4.16
  -2   6   8   51.84    3.97
  -2   6   7  121.59    6.91
  -2   6   6    4.25    1.73
  -2   6   5  354.73   16.44
  -2   6   4   34.57    3.16
  -2   6   3  518.56   23.09
   2   6  -2  141.85    8.21
   2   6  -1  108.62    6.66
   2   6  -1   91.87    6.90
   2   6   0   70.90    6.16
   2   6   1    1.05    3.34
   2   6   2  228.43   11.17
   2   6   2  198.51   10.58
   2   6   2  216.63   12.87
   2   6   3   95.08    5.87
   2   6   3   75.37    7.20
   2   6   3   79.25    5.51
   2   6   4  268.34   13.05
   2   6   4  245.55   12.93
   2   6   4  279.37   14.91
   2   6   5  376.59   16.99
   2   6   5  335.38   16.95
   2   6   6   29.20    3.29
   2   6   6   21.11    3.21
   2   6   7  201.77   10.75
   2   6   7  187.98    9.90
   2   6   7  178.81    9.98
   2   6   8   18.80    2.79
   2   6   8   17.18    2.63
   2   6   9  175.96    8.94
   2   6  10   26.69    2.51
   2   6  10   27.31    2.50
   2   6  11   86.34    4.73
   3   0 -21    0.49    1.45
   3   0 -20  491.31   22.20
   3   0 -20  507.22   22.38
   3   0 -19    0.19    2.07
   3   0 -19    2.21    2.00
   3   0 -18  460.46   20.89
  -3   0  18  407.14   26.07
   3   0 -17   -0.22    2.36
   3   0 -17   -1.76    3.96
  -3   0  17   -1.73    3.81
   3   0 -16  197.56   16.36
  -3   0  16  206.57   16.49
   3   0 -16  216.55   11.21
  -3   0  15   -2.73    4.18
   3   0 -15   -0.91    2.62
   3   0 -15    1.87    3.69
  -3   0  14  253.03   18.11
   3   0 -14  220.26   11.86
   3   0 -14  234.31   17.69
   3   0 -13    1.87    4.74
   3   0 -13   -0.23    2.63
  -3   0  13   -2.78    4.70
   3   0 -12   89.11   11.38
   3   0 -12  101.51    6.73
  -3   0  12   90.74   11.07
   3   0 -11    2.07    2.13
   3   0 -11   -0.67    2.67
   3   0 -11   -2.77    5.74
  -3   0  11   -0.91    5.08
  -3   0  10   57.88    9.29
   3   0 -10   72.77    5.51
   3   0  -9   -0.98    2.74
   3   0  -9    4.11    5.35
  -3   0   9    5.37    4.41
  -3   0   8 1916.86   79.97
   3   0  -8 1722.46   73.95
  -3   0   7    2.56    3.94
  -3   0   6 1420.97   62.98
  -3   0   5    1.36    3.11
  -3   0   4 2377.39  100.97
  -3   0   3   -0.53    2.81
  -3   0   2  106.27    6.98
  -3   0   1   -0.21    2.60
   3   0   0 1971.53   83.14
  -3   0   0 2012.09   81.98
  -3   0   0 1879.19   83.04
  -3   0  -1   -0.60    2.77
   3   0   1    0.83    2.51
  -3   0  -2   12.72    3.66
   3   0   2   15.77    3.00
  -3   0  -3    0.96    3.11
   3   0   4 1732.10   74.56
  -3   0  -4 1800.58   75.92
  -3   0  -4 1727.82   75.02
   3   0   5    1.69    2.34
  -3   0  -5    0.40    3.43
  -3   0  -5   -2.00    3.27
  -3   0  -6 1826.06   78.42
   3   0   6 1728.13   77.04
  -3   0  -6 1819.45   78.00
   3   0   7    2.97    3.15
  -3   0  -7    2.58    4.47
  -3   0  -7    1.26    1.90
  -3   0  -8   72.43    5.01
  -3   0  -8   77.91    5.26
   3   0   8   73.88    7.73
   3   0   9    8.51    4.04
  -3   0  -9    1.37    2.55
  -3   0  -9   -1.16    2.99
  -3   0  -9    2.50    6.25
  -3   0 -10  440.91   20.98
   3   0  10  434.33   24.95
  -3   0 -10  465.72   20.99
  -3   0 -10  443.58   27.86
  -3   0 -11    0.98    6.38
   3   0  11    0.69    3.17
  -3   0 -11   -1.47    3.73
  -3   0 -11    2.20    3.09
   3   0  12  791.65   38.49
  -3   0 -12  745.87   33.10
  -3   0 -12  783.58   39.58
  -3   0 -12  739.19   33.41
   3   0  13   -1.37    3.22
  -3   0 -13    0.43    2.80
  -3   0 -13    1.75    4.02
  -3   0 -13    1.38    2.13
  -3   0 -14  768.81   33.93
  -3   0 -14  773.33   34.23
   3   0  14  788.64   39.02
  -3   0 -15    2.20    2.84
  -3   0 -15    1.35    2.12
  -3   0 -16   98.34    6.64
  -3   0 -16   95.40    6.00
  -3   0 -17    0.22    2.88
  -3   0 -17    0.18    1.90
  -3   0 -18  518.87   23.01
  -3   0 -19    0.37    2.06
  -3   0 -20  315.16   14.72
  -3   0 -21   -0.75    1.54
   3  -1 -21   69.25    4.01
   3   1 -21   57.36    3.99
   3   1 -21   58.71    4.11
   3  -1 -20  125.58    6.91
   3  -1 -20  137.51    7.21
   3   1 -20  142.63    7.54
   3   1 -20  138.91    7.44
   3   1 -19  142.56    8.19
   3   1 -19  149.60    8.26
   3  -1 -19  149.87    7.82
   3  -1 -19  148.81    8.08
   3   1 -18   15.02    2.96
   3   1 -18   12.38    2.91
   3   1 -17  245.40   18.17
   3   1 -17  284.66   13.73
   3   1 -17  278.51   13.77
  -3  -1  17  238.03   18.24
  -3   1  17  246.20   18.39
   3   1 -16   72.39    5.77
  -3  -1  16   58.97    8.49
   3   1 -16   76.77    9.06
  -3   1  16   66.05    8.81
   3   1 -16   73.77    5.48
   3   1 -15  160.04    9.26
   3  -1 -15  146.60    8.32
   3   1 -15  132.02   12.68
  -3  -1  15  154.65   13.84
  -3   1  15  145.34   13.46
   3   1 -15  156.25    8.98
   3   1 -14  478.93   22.96
   3  -1 -14  488.42   22.23
   3   1 -14  468.59   28.13
   3  -1 -14  485.50   29.51
  -3  -1  14  539.08   29.93
  -3   1  14  489.54   28.86
   3  -1 -13  108.19    6.75
   3   1 -13  107.72    7.50
   3   1 -13  108.36   11.38
  -3  -1  13  112.09   12.00
  -3   1  13  108.77   11.67
   3  -1 -12  616.63   28.03
   3   1 -12  624.30   28.90
   3   1 -12  673.40   35.60
   3  -1 -12  674.03   35.24
  -3  -1  12  691.09   36.60
  -3   1  12  572.35   34.27
  -3  -1  11    2.96    5.68
   3   1 -11    5.45    4.69
   3  -1 -11    3.80    2.35
   3  -1 -11    3.66    2.65
   3  -1 -11    3.46    5.45
   3   1 -11    1.91    3.22
  -3   1  11    1.70    4.76
   3  -1 -10  172.82   11.21
   3  -1 -10  207.40   15.82
  -3  -1  10  185.81   15.99
  -3   1  10  178.30   14.45
   3  -1 -10  175.39    9.55
   3   1 -10  189.14   10.71
   3   1  -9  107.49   11.87
   3  -1  -9  114.37   11.95
   3  -1  -9  122.99    8.27
   3  -1  -9  118.65    6.70
   3  -1  -9  121.38    7.46
   3   1  -9  105.74    7.49
  -3  -1   9  119.69   11.89
  -3   1   9  142.15   11.47
   3  -1  -8  891.06   39.58
   3   1  -8  967.34   44.69
   3  -1  -8  958.88   44.52
  -3  -1   8 1026.21   44.75
  -3   1   8  953.19   43.04
   3   1  -8  909.33   38.58
   3  -1  -7 1578.07   71.32
   3  -1  -7 1613.45   70.45
  -3  -1   7 1839.72   75.15
  -3   1   7 1718.92   73.99
   3   1  -7 1711.34   70.37
   3   1  -6  846.17   36.98
  -3  -1   6  874.47   40.30
  -3   1   6  839.93   39.69
   3  -1  -6  885.38   37.23
  -3  -1   5 1113.54   49.49
  -3   1   5 1104.50   49.28
  -3  -1   4  238.19   13.05
  -3   1   4  236.93   12.99
  -3  -1   3 2153.22   90.03
  -3   1   3 2084.38   89.88
  -3  -1   2  216.58   11.38
  -3   1   2  209.32   11.28
  -3  -1   1 1854.08   78.50
  -3   1   1 1854.63   78.57
   3   1   0 1552.00   66.16
  -3  -1   0 1534.92   66.14
  -3   1   0 1576.04   66.32
   3  -1   0 1562.11   66.14
   3  -1   1    4.45    2.33
   3   1   1    3.97    2.93
   3   1   1    6.96    2.42
   3   1   2  543.84   25.68
  -3   1  -3  559.26   26.03
  -3  -1  -3  547.53   25.99
   3  -1   3  557.91   24.51
   3   1   3  590.27   26.95
  -3   1  -4  772.66   34.32
   3  -1   4  739.31   32.59
  -3  -1  -4  752.38   34.29
   3   1   4  760.20   35.05
  -3  -1  -5  268.46   14.83
   3   1   5  277.37   15.40
  -3   1  -5  254.18   14.64
   3   1   6 1518.97   65.91
  -3  -1  -6 1456.19   65.25
  -3   1  -6 1432.85   65.18
   3   1   7 1032.90   48.31
  -3  -1  -7 1001.44   43.16
  -3  -1  -7 1021.25   48.11
  -3   1  -7 1042.29   48.09
  -3  -1  -8   19.37    2.92
  -3   1  -8   22.22    3.37
  -3  -1  -8   25.22    3.48
   3   1   8   14.42    5.16
  -3   1  -8   22.55    6.79
  -3  -1  -8   27.02    6.92
  -3   1  -9 1693.77   72.72
   3   1   9 1594.38   78.97
  -3   1  -9 1847.33   73.02
  -3   1  -9 1793.06   80.44
  -3  -1  -9 1713.14   80.35
  -3  -1  -9 1640.85   72.67
  -3  -1 -10  483.68   25.80
  -3   1 -10  390.87   19.42
   3   1  10  405.22   25.30
  -3   1 -10  413.50   25.93
  -3  -1 -10  414.82   25.99
  -3   1 -10  402.18   19.20
  -3  -1 -10  416.50   19.30
  -3  -1 -11  935.70   45.11
  -3   1 -11  809.44   37.11
   3   1  11  876.70   45.36
  -3   1 -11  891.63   38.53
  -3  -1 -11  971.96   46.64
  -3   1 -11  905.67   45.84
  -3   1 -11  897.51   38.19
  -3  -1 -11  881.83   38.18
  -3  -1 -12  732.85   35.34
   3   1  12  703.05   35.32
  -3  -1 -13   65.14    4.99
  -3   1 -13   70.79    5.55
  -3  -1 -13   70.82    9.37
   3   1  13   60.90    8.59
  -3   1 -13   54.81    4.11
  -3  -1 -13   70.52    5.36
  -3   1 -14  580.69   27.07
  -3  -1 -14  604.81   26.67
  -3  -1 -14  586.04   33.61
   3   1  14  599.49   33.19
  -3  -1 -14  596.23   27.07
   3   1  15   31.92    6.42
  -3  -1 -15   43.56    4.19
  -3   1 -15   45.00    4.60
  -3  -1 -15   38.86    4.09
  -3  -1 -15   45.32    7.60
  -3   1 -16   41.13    4.63
   3   1  16   36.09    6.37
  -3  -1 -16   40.39    3.95
  -3  -1 -16   42.37    4.17
  -3  -1 -16   37.02    7.40
  -3  -1 -17    3.04    2.24
  -3   1 -17   -0.46    2.93
  -3   1 -18   64.32    5.11
  -3  -1 -18   67.36    4.75
  -3   1 -19  110.03    6.42
  -3  -1 -19   95.64    5.89
  -3  -1 -19   97.39    5.80
  -3  -1 -20   88.67    5.41
  -3  -1 -20  103.43    5.59
  -3   1 -20  103.09    5.88
  -3  -1 -21  165.66    8.31
  -3   1 -21  192.99    8.79
   3   1  22    6.04    1.03
   3   2 -21   37.94    2.96
   3  -2 -20   34.70    2.79
   3   2 -20   42.01    3.48
   3  -2 -19    9.10    1.90
   3   2 -19    6.55    2.35
  -3   2  19    5.42    1.35
   3   2 -19    6.94    2.37
   3   2 -18  133.92    7.68
   3   2 -18  119.13    7.35
   3   2 -17   46.46    4.40
   3   2 -17   53.25    4.84
   3   2 -16   19.00    3.19
  -3   2  16   16.43    4.80
   3  -2 -16   18.24    5.00
  -3  -2  16    9.57    4.38
   3   2 -16   16.89    3.45
   3   2 -15  201.54   11.04
   3   2 -15  194.08   10.59
   3  -2 -15  200.12   16.31
  -3   2  15  182.61    9.51
  -3  -2  15  181.89   15.23
  -3   2  15  183.78   14.81
   3  -2 -14   18.08    5.52
  -3   2  14   20.88    5.76
  -3   2  14   16.13    2.37
   3   2 -14   15.49    3.33
  -3  -2  14   24.81    6.15
   3   2 -13  812.06   33.73
   3  -2 -13  701.05   39.47
   3   2 -13  772.25   34.06
  -3   2  13  712.62   32.30
  -3  -2  13  777.48   40.74
  -3   2  13  709.03   38.76
   3   2 -13  635.48   36.13
  -3   2  12   -1.68    4.77
   3  -2 -12    1.51    2.65
   3   2 -12    1.35    4.19
   3   2 -12    2.61    3.05
  -3  -2  12   -1.01    5.33
   3   2 -12    1.81    2.83
  -3   2  12    0.92    1.37
   3   2 -11 1079.35   49.77
  -3  -2  11 1163.54   57.57
   3   2 -11 1166.46   53.22
  -3   2  11 1085.47   48.31
  -3   2  11 1016.32   54.36
   3   2 -10    6.75    3.21
   3  -2 -10   -1.39    4.53
   3   2 -10   -0.78    5.47
   3  -2 -10    0.25    2.68
   3  -2 -10    0.53    2.84
  -3   2  10   -1.42    4.48
  -3   2  10   -1.00    1.54
  -3  -2  10   -4.72    6.53
   3  -2  -9  852.36   40.23
   3   2  -9  809.39   35.41
   3   2  -9  841.95   40.96
  -3   2   9  787.74   34.60
  -3  -2   9  844.52   41.58
  -3   2   9  795.78   39.10
   3  -2  -9  741.19   35.28
   3   2  -8   13.35    5.53
   3  -2  -8   10.62    5.15
  -3  -2   8    9.82    4.63
  -3   2   8    7.61    3.76
   3  -2  -8   10.67    3.12
  -3   2   8   11.27    2.44
   3   2  -8   10.25    2.79
  -3   2   7   13.13    3.51
   3  -2  -7    8.31    4.42
   3   2  -7   11.82    5.61
   3   2  -7   12.77    2.63
  -3  -2   7   17.08    4.45
   3  -2  -7   14.98    3.17
  -3   2   7   13.66    2.77
   3   2  -6  158.46   11.30
  -3  -2   6  127.21    9.32
   3   2  -6  121.80    7.19
  -3   2   6  134.23    8.97
  -3   2   6  122.14    7.57
   3  -2  -6  139.38   10.49
   3  -2  -6  143.05    7.47
   3   2  -5    0.30    1.94
  -3   2   5    2.14    2.31
  -3  -2   5    1.04    2.46
  -3   2   5    0.97    2.40
   3  -2  -5    1.94    1.89
  -3   2   4  293.11   13.81
  -3  -2   4  276.35   15.36
  -3   2   4  327.40   14.56
  -3   2   4  307.09   15.49
  -3   2   3  616.63   28.75
  -3   2   3  612.74   27.27
  -3   2   3  673.41   27.83
  -3  -2   3  626.56   28.85
  -3   2   2  202.83    9.50
  -3   2   2  187.84    9.11
  -3  -2   2  190.92   10.36
  -3   2   2  178.14   10.12
   3   2  -1 1006.79   45.36
   3   2   0    0.36    2.90
   3  -2   1 1876.19   79.51
   3   2   1 1866.15   79.49
   3   2   1 1923.86   81.68
  -3  -2  -2   14.77    3.04
   3   2   2   18.76    4.30
   3  -2   2   11.62    2.58
  -3   2  -2   14.77    3.20
   3   2   2   18.92    2.87
  -3   2  -3 3207.41  130.60
  -3  -2  -3 2951.91  130.18
   3  -2   3 3009.74  129.99
   3   2   3 3254.51  130.40
   3   2   3 3100.79  128.58
   3   2   4    0.13    1.88
  -3  -2  -4    0.34    2.99
  -3   2  -4    1.42    3.10
  -3   2  -4    1.64    1.38
  -3  -2  -5 1225.10   54.85
   3   2   5 1211.08   51.39
  -3   2  -5 1197.80   51.27
  -3   2  -5 1258.68   55.03
  -3   2  -5 1223.53   51.32
  -3   2  -6   41.02    3.51
  -3   2  -6   38.30    3.14
   3   2   6   42.79    3.31
  -3  -2  -6   50.30    6.35
  -3   2  -6   50.94    6.49
   3   2   6   45.90    6.32
  -3  -2  -7   49.71    9.31
  -3  -2  -7   51.25    4.38
  -3   2  -7   60.32    4.38
   3   2   7   66.72    8.52
   3   2   7   63.59    4.14
  -3   2  -7   39.77    7.67
  -3   2  -7   44.82    4.31
  -3  -2  -8   20.89    3.17
  -3  -2  -8   15.56    5.95
  -3   2  -8   19.81    3.22
   3   2   8   12.70    5.49
  -3   2  -8   18.28    3.14
  -3   2  -8   26.39    6.71
   3   2   8   17.02    2.56
   3   2   9   31.52    3.51
  -3   2  -9   40.41    7.67
  -3  -2  -9   41.97    7.57
  -3   2  -9   41.59    4.53
   3   2   9   40.69    8.05
  -3  -2  -9   36.70    3.83
   3   2   9   45.40    4.46
  -3   2  -9   47.50    4.16
  -3   2 -10  337.56   16.04
  -3   2 -10  359.64   17.02
   3   2  10  343.60   16.86
  -3   2 -11  249.75   12.63
   3   2  11  222.35   19.41
  -3  -2 -12  172.59   10.05
  -3  -2 -12  147.96   14.79
  -3   2 -12  168.58    9.49
   3   2  12  153.01   15.54
  -3  -2 -13  267.99   20.17
  -3   2 -13  284.52   14.27
   3   2  13  271.23   21.05
  -3   2 -14    3.40    3.07
   3   2  14    1.06    3.80
  -3  -2 -14    1.00    4.49
  -3  -2 -15  614.54   34.46
   3   2  15  536.96   33.78
  -3   2 -15  616.09   27.45
  -3   2 -16   14.23    3.27
  -3  -2 -16   18.19    5.42
   3   2  16   23.16    5.73
  -3   2 -17  670.29   28.57
  -3  -2 -17  594.86   28.05
  -3  -2 -18    1.61    1.74
  -3   2 -18   -0.61    2.22
  -3  -2 -18   -1.66    2.03
  -3   2 -19  100.27    6.17
  -3  -2 -19  104.69    5.93
  -3  -2 -20    1.46    1.40
  -3   2 -20    2.02    1.63
   3   2  21    7.07    1.35
  -3   3  19   75.88    4.20
   3   3 -18    2.26    2.05
  -3   3  18   -0.27    1.24
   3   3 -17   86.54    5.96
   3   3 -16    3.72    2.70
  -3   3  16    3.18    1.45
   3   3 -15   19.78    3.84
  -3   3  15   24.32    2.64
   3   3 -14  373.31   17.72
  -3   3  14  339.61   16.16
  -3   3  13    1.12    1.80
   3  -3 -13    5.84    4.00
   3   3 -13    1.74    3.52
   3   3 -12  773.66   35.21
   3  -3 -12  701.96   39.08
  -3   3  12  796.68   33.75
  -3   3  12  719.52   32.96
   3   3 -11    3.77    4.02
   3  -3 -11    2.47    3.62
  -3   3  11    7.62    2.39
  -3   3  11    5.82    1.96
   3  -3 -10  955.04   49.10
   3   3 -10 1044.15   45.02
  -3   3  10  957.78   43.80
  -3   3  10 1001.12   43.25
   3   3  -9   11.96    3.70
  -3   3   9   10.85    2.77
   3  -3  -9   10.39    4.92
  -3   3   9    6.01    2.35
   3   3  -8  156.85    9.34
  -3   3   8  144.05    8.77
  -3   3   8  142.78    8.56
   3   3  -7  127.10    7.92
  -3   3   7  123.10    7.49
  -3   3   7  110.11    7.47
   3   3  -6    2.03    1.66
   3   3  -6    1.17    2.47
  -3   3   6    0.22    1.75
  -3   3   6    2.32    2.69
   3   3  -5  762.64   32.62
  -3   3   5  758.46   32.58
  -3   3   5  788.02   33.30
  -3   3   5  699.04   33.65
  -3   3   4   14.11    2.13
   3   3  -4   10.53    2.08
  -3   3   4   16.27    3.04
  -3   3   3  693.47   29.95
  -3   3   2  143.94    7.36
  -3   3   2  147.13    7.67
   3   3  -2  140.20    7.41
   3   3  -1  172.99    8.51
  -3   3   1  168.66    8.60
  -3   3   1  173.67    8.82
   3   3  -1  159.65    9.01
  -3   3   1  172.88    8.45
  -3   3   1  157.72    8.31
  -3   3   0  890.05   38.82
   3   3   0  906.57   38.98
  -3   3   0  919.29   38.79
  -3   3   0  948.51   39.13
  -3   3   0  878.74   38.81
   3   3   0  933.00   42.78
  -3   3   0  912.56   39.14
   3   3   1  114.51    6.32
  -3   3  -1  113.46    5.86
  -3   3  -1  101.12    6.00
  -3   3  -1  111.30    5.73
  -3   3  -1  110.03    6.15
  -3   3  -1  103.35    5.89
   3   3   1  105.18    6.54
  -3   3  -1  112.50    6.11
   3   3   1   93.28    8.80
   3   3   2 1042.99   43.13
   3   3   2 1024.29   43.36
  -3   3  -2 1000.22   42.36
   3   3   2 1106.60   47.91
  -3   3  -2  994.30   42.40
  -3   3  -2  976.79   42.47
  -3   3  -2  984.87   42.89
  -3   3  -2  965.62   42.71
  -3   3  -2 1032.69   42.77
  -3   3  -3    6.73    1.54
  -3   3  -3    7.80    1.82
   3   3   3    1.21    3.40
  -3   3  -3    2.94    1.51
   3   3   3    4.55    2.39
  -3   3  -3    6.25    1.82
  -3   3  -4 1602.49   70.00
  -3   3  -4 1655.93   70.07
   3   3   4 1736.96   75.78
  -3   3  -4 1700.87   70.25
   3   3   4 1727.03   70.84
  -3   3  -5   66.97    4.68
   3   3   5   74.25    8.51
  -3   3  -5   69.46    4.52
   3   3   5   68.12    5.13
  -3   3  -5   64.83    4.67
   3   3   6  395.55   23.37
  -3   3  -6  334.97   17.08
  -3   3  -6  377.36   16.87
   3   3   6  396.74   17.62
  -3   3  -6  352.85   16.66
   3   3   7  299.30   19.74
  -3   3  -7  244.00   12.88
  -3   3  -7  225.63   12.15
  -3   3  -7  254.81   12.15
   3   3   7  286.15   13.26
  -3   3  -8    4.16    2.32
  -3   3  -8    3.31    2.36
   3   3   8    3.33    2.69
  -3   3  -8    4.26    2.73
   3   3   8    7.63    3.72
  -3   3  -9  392.67   18.94
  -3   3  -9  419.52   19.27
   3   3   9  432.52   21.35
   3   3   9  431.76   20.19
  -3   3 -10  199.83   10.72
  -3   3 -10  226.25   11.02
   3   3  10  200.72   12.42
  -3   3 -11  293.96   14.89
  -3  -3 -11  336.20   15.90
  -3   3 -11  319.15   14.99
   3   3  11  305.19   16.34
   3   3  12  186.66   17.85
  -3   3 -12  176.30    9.28
  -3   3 -12  165.47    9.39
   3   3  12  150.48    9.89
  -3  -3 -12  174.20    9.92
  -3   3 -13  137.78    7.85
  -3  -3 -13  136.14   14.61
   3   3  13  136.90   15.02
  -3   3 -13  140.15    8.39
  -3  -3 -13  144.22    8.69
  -3   3 -13  148.98    8.19
  -3   3 -14  148.71    8.40
   3   3  14  164.44   15.74
  -3   3 -14  168.94    9.34
  -3   3 -14  170.14    8.93
  -3  -3 -14  164.51    9.37
  -3   3 -15    1.01    2.19
  -3  -3 -15    2.81    4.01
  -3  -3 -15   -0.23    2.43
  -3  -3 -16  382.76   17.96
  -3   3 -16  376.71   17.70
   3   3  17   25.13    2.60
  -3   3 -17   28.68    3.19
  -3  -3 -17   27.38    3.12
  -3   3 -18  297.78   14.03
  -3  -3 -18  306.85   14.11
   3   3  19   98.14    5.17
   3   3  20   36.75    2.32
  -3   4  17   30.25    2.50
  -3   4  16  239.98   11.52
  -3   4  16  240.94   11.23
  -3   4  15   65.62    4.29
  -3   4  14   31.88    3.12
  -3   4  13   76.58    5.25
  -3   4  12   -0.49    2.20
  -3   4  11   28.38    3.51
  -3   4  11   22.58    6.50
  -3   4  11   26.78    3.29
  -3   4  10    3.57    2.64
  -3   4  10    5.46    2.46
  -3   4   9   35.46    4.28
  -3   4   9   34.78    3.97
   3   4  -9   29.46    3.14
   3   4  -8  166.01    9.40
  -3   4   8  177.35   10.46
  -3   4   8  187.63   10.46
  -3   4   7  436.34   20.45
  -3   4   7  429.36   20.69
   3   4  -7  455.92   19.93
  -3   4   7  374.71   19.17
  -3   4   6  800.04   35.54
  -3   4   6  795.19   40.55
   3   4  -6  747.22   36.28
  -3   4   6  776.51   36.76
   3   4  -6  861.74   36.35
   3   4  -6  866.92   35.71
   3   4  -5   23.72    3.93
   3   4  -5   26.72    3.15
  -3   4   5   28.51    3.32
  -3   4   5   23.73    4.49
   3   4  -5   25.32    4.04
  -3   4   5   21.62    3.79
   3   4  -4 2091.69   86.72
   3   4  -4 2200.31   88.48
  -3   4   4 2067.56   87.09
   3   4  -4 1981.19   87.69
  -3   4   4 1998.62   86.67
   3   4  -3   82.76    5.43
  -3   4   3   72.34    5.23
  -3   4   3   73.72    5.09
  -3   4   3   84.01    5.52
  -3   4   3   86.05    6.14
   3   4  -3   76.51    6.35
  -3   4   3   79.28    5.24
  -3   4   2  858.02   37.92
   3   4  -2  905.39   37.91
  -3   4   2  863.20   37.71
  -3   4   2  889.12   38.40
  -3   4   2  827.28   37.63
   3   4  -2  914.92   38.88
  -3   4   2  839.53   37.55
   3   4  -1  210.41   11.92
  -3   4   1  232.76   11.31
  -3   4   1  208.85   11.00
  -3   4   1  214.64   11.33
  -3   4   1  213.93   10.91
  -3   4   1  223.86   10.87
  -3   4   0   18.29    2.58
   3   4   0   17.95    2.97
  -3   4   0   16.07    2.77
  -3   4   0   15.77    2.37
  -3   4   0   16.37    2.24
  -3   4   0   20.75    2.82
   3   4   0   26.83    3.70
   3   4   1   88.62    5.74
  -3   4  -1   73.37    5.41
  -3   4  -1   83.57    5.10
  -3   4  -1   73.89    4.79
   3   4   1   76.09    8.42
  -3   4  -1   79.51    5.25
  -3   4  -2  125.64    7.06
  -3   4  -2  131.77    7.30
   3   4   2  124.57   11.10
  -3   4  -3  119.37    7.05
  -3   4  -3  136.22    7.30
   3   4   3  130.82   11.65
   3   4   3  140.84    8.45
  -3   4  -4  143.52    7.90
   3   4   4  172.27   11.36
   3   4   4  169.04    9.58
  -3   4  -4  138.17    7.84
   3   4   4  138.91   12.65
   3   4   5   83.47    8.04
   3   4   5   74.54    9.13
  -3   4  -5   71.34    4.93
   3   4   5   88.14    6.05
   3   4   5   82.11    6.57
   3   4   6  343.28   20.15
   3   4   6  377.07   18.26
  -3  -4  -6  383.42   18.32
   3   4   6  391.68   19.13
   3   4   6  357.11   23.24
  -3  -4  -7   73.99    5.73
   3   4   7   81.09    5.96
   3   4   7   64.93    4.57
   3   4   7   59.09    9.08
   3   4   7   60.03    6.23
   3   4   7   66.54    7.55
   3   4   8  602.51   27.15
   3   4   8  583.12   30.15
   3   4   8  656.65   35.98
   3   4   8  588.16   28.99
   3   4   8  659.69   28.78
  -3  -4  -8  624.95   28.02
   3   4   9    3.43    3.18
   3   4   9    1.13    5.63
   3   4   9   -1.33    4.36
   3   4   9   -1.54    2.16
  -3  -4  -9    0.71    2.46
   3   4  10  873.95   40.57
  -3  -4 -10  877.23   39.61
   3   4  10  951.16   39.57
   3   4  10  890.29   41.54
   3   4  10  922.91   50.22
  -3  -4 -11    4.87    2.42
   3   4  11    5.26    6.19
   3   4  11    5.64    3.27
   3   4  11    5.21    2.90
   3   4  11    1.61    2.55
   3   4  12  160.63    9.99
   3   4  12  218.58   11.04
   3   4  12  201.26   10.98
   3   4  12  142.88   16.66
  -3  -4 -12  192.72   10.05
   3   4  13  142.71    8.40
  -3  -4 -13  152.49    8.25
   3   4  14    3.92    2.06
  -3  -4 -14    5.63    2.15
   3   4  14    3.59    2.36
  -3  -4 -15  193.52    9.37
   3   4  15  173.33    9.02
   3   4  15  182.59    9.09
   3   4  16   41.87    3.07
  -3  -4 -16   51.88    3.56
  -3  -4 -17   78.24    4.52
  -3   5  15  167.76    8.00
  -3   5  14    1.70    1.26
  -3   5  14    0.72    1.13
  -3   5  14   -0.26    1.23
  -3   5  13   41.20    3.50
  -3   5  13   50.54    3.65
  -3   5  13   44.95    3.43
  -3   5  12   71.58    5.17
  -3   5  12   78.00    5.08
  -3   5  12   83.91    5.34
  -3   5  11   24.76    3.10
  -3   5  11   31.80    3.39
  -3   5  11   24.33    3.16
  -3   5  10   98.60    6.27
  -3   5  10   89.88    6.35
  -3   5  10   98.59    6.41
  -3   5   9  223.80   11.90
  -3   5   9  231.24   11.75
  -3   5   8   19.62    2.96
  -3   5   8   22.76    2.95
  -3   5   8   17.66    3.39
  -3   5   7  482.11   21.05
  -3   5   7  495.47   21.76
  -3   5   7  462.57   21.96
  -3   5   7  461.50   21.07
  -3   5   6   26.00    3.10
  -3   5   6   33.31    3.30
  -3   5   6   33.80    3.66
   3   5  -6   32.05    3.78
  -3   5   6   24.38    3.35
   3   5  -5  463.81   20.29
  -3   5   5  446.41   20.00
   3   5  -5  486.24   21.08
  -3   5   5  425.25   19.82
  -3   5   5  464.66   20.54
  -3   5   5  414.86   20.04
  -3   5   4   -0.68    2.35
  -3   5   4   -0.39    1.67
   3   5  -4    1.37    3.39
  -3   5   4    0.21    1.78
   3   5  -4    4.47    3.20
  -3   5   4    0.95    1.97
  -3   5   4    0.59    2.75
   3   5  -4   -0.89    2.39
  -3   5   3  286.09   14.66
  -3   5   3  284.56   14.17
   3   5  -3  271.83   16.22
  -3   5   3  297.59   14.73
   3   5  -3  297.28   15.92
   3   5  -3  331.55   15.02
  -3   5   3  307.87   14.48
  -3   5   2   40.62    4.09
  -3   5   2   34.57    3.30
  -3   5   2   42.73    3.70
   3   5  -2   32.89    6.01
   3   5  -2   38.63    5.35
  -3   5   2   47.29    4.01
   3   5  -2   42.89    4.23
  -3   5   1  163.65    9.73
  -3   5   1  181.12    9.39
  -3   5   1  175.37    9.65
   3   5  -1  197.92   10.22
   3   5  -1  201.67   11.55
   3   5  -1  163.66    9.35
   3   5  -1  180.96   12.73
   3   5   0   16.06    6.19
  -3   5   0   10.66    2.39
  -3   5   0    7.68    1.93
   3   5   0    8.55    2.91
   3   5   0   14.06    4.20
   3   5   1  107.70   10.65
   3   5   1  116.53    7.34
   3   5   1  117.75    8.35
  -3   5  -1  104.65    6.21
  -3   5  -1   96.95    6.38
  -3   5  -2  162.96    8.76
   3   5   2  162.47   13.21
   3   5   3   13.26    6.25
   3   5   3   18.87    2.35
   3   5   4  209.51   12.54
   3   5   5  319.31   19.52
   3   5   5  352.41   16.91
   3   5   5  332.96   17.91
   3   5   6    9.87    2.96
   3   5   6   12.88    5.09
   3   5   7  585.55   26.41
   3   5   7  535.62   27.79
   3   5   8   53.22    5.05
   3   5   8   50.01    5.97
   3   5   9  340.13   17.34
   3   5   9  362.09   18.23
   3   5  10   -1.03    2.67
   3   5  10    1.20    2.74
   3   5  11  134.37    8.51
   3   5  11  150.82    8.35
   3   5  12    3.40    1.67
   3   5  12    5.52    2.05
   3   5  13  139.49    7.19
   3   5  13  135.64    7.18
   3   5  14   40.99    3.07
   3   5  14   45.09    3.05
  -3   6  10   34.47    2.82
  -3   6   9  138.85    7.44
  -3   6   8   89.17    5.47
  -3   6   7  127.56    7.13
  -3   6   6  111.71    6.44
  -3   6   5    3.93    1.74
  -3   6   4   60.04    4.13
  -3   6   3   70.17    4.63
   3   6  -2  124.72    6.95
  -3   6   2  102.68    6.18
   3   6  -1  202.48   12.40
   3   6  -1  269.94   12.21
   3   6   0  139.73    9.64
   3   6   0  165.05    8.62
   3   6   1  600.44   26.60
   3   6   1  581.48   28.27
   3   6   2    5.89    3.90
   3   6   2    4.15    1.68
   3   6   3  169.10   11.24
   3   6   3  175.32    9.17
   3   6   4   85.03    7.25
   3   6   4   68.16    5.21
   3   6   4   88.84    5.51
   3   6   5  195.22    9.66
   3   6   5  163.90    9.49
   3   6   6  167.30    8.28
   3   6   6  122.87    7.95
   3   6   7   63.08    4.63
   3   6   7   59.07    4.61
   3   6   7   55.23    4.97
   3   6   8  100.50    6.10
   3   6   8  103.79    6.48
   3   6   8  100.36    6.11
   3   6   9   -0.59    1.59
   3   6  10   59.52    3.78
   4   0 -21   -0.51    1.41
   4   0 -21   -0.92    1.33
   4   0 -20  219.32   10.70
   4   0 -20  227.71   10.94
   4   0 -19    0.37    1.94
   4   0 -19   -1.00    1.79
   4   0 -18  117.19    7.20
   4   0 -18  138.12    7.61
   4   0 -17   -1.85    2.19
  -4   0  17   -2.53    4.04
   4   0 -17    2.65    2.49
   4   0 -17    1.72    3.86
   4   0 -16   34.53    3.85
   4   0 -16   33.94    6.92
  -4   0  16   29.80    6.65
   4   0 -16   40.63    4.08
   4   0 -15    1.68    2.67
   4   0 -15   -0.97    4.24
  -4   0  15   -1.91    4.49
   4   0 -14  349.00   23.28
  -4   0  14  327.14   23.04
   4   0 -13   -0.78    2.88
   4   0 -13    1.01    5.22
  -4   0  13   -2.06    5.41
   4   0 -12 1729.30   74.73
   4   0 -12 1719.18   74.29
   4   0 -12 1880.91   83.66
  -4   0  12 1835.44   83.57
   4   0 -11    1.04    5.63
   4   0 -11   -1.29    3.31
  -4   0  11   -3.01    6.53
   4   0 -11   -2.25    2.87
   4   0 -10 1000.94   50.40
   4   0 -10  957.99   42.70
   4   0 -10  973.64   42.39
  -4   0  10 1040.39   50.30
  -4   0   9    1.55    4.99
   4   0  -9   -1.82    2.77
  -4   0   8  624.00   32.51
  -4   0   7   -1.07    3.72
   4   0  -6  321.24   14.48
  -4   0   6  292.97   17.41
  -4   0   5    2.42    3.21
  -4   0   4  346.69   18.30
  -4   0   3    0.34    3.08
  -4   0   2  145.58    9.29
  -4   0   1    2.58    2.81
   4   0  -1   -0.29    2.49
   4   0   0 1931.29   84.29
  -4   0   0 1997.99   82.39
  -4   0   0 1976.88   84.44
   4   0   1   -0.28    2.35
  -4   0  -1    0.60    2.23
   4   0   1   -1.16    2.79
   4   0   2 5334.02  214.03
  -4   0  -2 4785.31  213.53
   4   0   2 5315.91  213.86
  -4   0  -3   -1.44    3.26
   4   0   3    0.92    2.67
  -4   0  -4  887.05   39.90
  -4   0  -4  918.61   40.38
   4   0   4  817.51   39.02
  -4   0  -5   -0.80    3.54
  -4   0  -5   -0.90    3.47
  -4   0  -6  419.33   21.16
  -4   0  -6  372.07   16.98
  -4   0  -6  401.90   20.73
   4   0   7    1.38    3.18
  -4   0  -7    1.07    3.54
  -4   0  -7    0.26    1.88
  -4   0  -7    1.06    3.97
  -4   0  -8  284.30   17.96
   4   0   8  294.90   16.94
  -4   0  -8  284.35   17.13
  -4   0  -8  264.67   13.03
   4   0   9    1.26    3.20
  -4   0  -9   -1.29    3.38
  -4   0  -9    1.76    2.47
  -4   0  -9    1.90    2.65
  -4   0 -10    4.96    6.24
   4   0  10   -1.41    3.38
  -4   0 -10    1.87    2.60
  -4   0 -10    2.12    3.59
  -4   0 -10    4.56    3.34
  -4   0 -11   -1.25    3.29
  -4   0 -11    6.61    6.25
  -4   0 -11    0.25    2.71
   4   0  11    0.74    3.23
  -4   0 -12  375.00   25.45
   4   0  12  399.07   22.42
  -4   0 -12  333.86   17.30
   4   0  13   -0.72    3.31
  -4   0 -13    0.49    3.35
  -4   0 -13   -2.33    2.36
  -4   0 -14  871.67   37.58
  -4   0 -14  830.53   37.12
  -4   0 -15    1.79    2.97
  -4   0 -15   -0.58    2.07
  -4   0 -16  956.97   40.57
  -4   0 -16  901.29   39.95
  -4   0 -17   -1.68    2.69
  -4   0 -17    3.47    1.81
  -4   0 -18  544.51   24.61
  -4   0 -19   -0.70    2.06
  -4   0 -20   34.51    3.18
  -4   0 -21   -0.58    1.40
   4   0  21    1.10    0.87
   4   1 -21   49.95    3.44
   4  -1 -21   47.62    3.26
   4   1 -20  235.21   11.53
   4   1 -20  244.77   11.73
   4  -1 -20  239.98   11.38
   4  -1 -19    0.99    1.68
   4   1 -19    0.18    1.95
   4   1 -19    3.88    2.24
   4  -1 -19    0.89    1.52
   4  -1 -18  197.71   10.07
   4  -1 -18  189.08    9.65
   4   1 -18  197.40   10.25
   4  -1 -17    1.54    1.78
   4   1 -17    0.90    2.39
  -4  -1  17   -0.80    4.01
  -4   1  17   -2.39    4.25
   4  -1 -17   -0.20    2.04
  -4   1  16   47.21    7.75
   4   1 -16   69.49    5.21
   4   1 -16   62.44    8.15
  -4   1  16   49.71    3.80
  -4  -1  16   53.26    8.30
   4   1 -15  159.23    9.23
   4   1 -15  133.56   12.90
  -4  -1  15  148.38   14.26
  -4   1  15  143.71   13.65
  -4  -1  14   37.52    8.22
  -4   1  14   36.10    7.61
   4   1 -14   36.60    7.01
   4   1 -14   36.70    4.50
   4  -1 -13  665.72   36.96
   4   1 -13  703.43   37.88
   4   1 -13  666.36   30.55
  -4  -1  13  683.81   38.15
  -4   1  13  598.32   36.18
  -4  -1  12  111.07   13.42
   4  -1 -12  122.50   13.16
   4   1 -12  114.00   12.92
   4   1 -12  114.59    8.03
  -4   1  12   97.60   11.90
   4  -1 -11  611.60   26.66
   4   1 -11  620.45   26.78
   4  -1 -11  616.45   34.49
   4   1 -11  678.70   35.72
   4   1 -11  559.59   27.43
   4   1 -11  531.40   27.28
  -4  -1  11  556.50   34.55
  -4   1  11  533.65   32.69
  -4  -1  10   32.89    7.49
   4  -1 -10   28.20    3.50
   4   1 -10   23.90    4.03
  -4   1  10   26.72    6.65
   4  -1 -10   27.63    7.71
   4   1 -10   34.76    8.34
   4   1 -10   24.45    4.24
   4   1 -10   26.15    3.57
  -4   1  10   26.89    2.95
   4   1  -9  218.29   11.53
   4   1  -9  238.06   11.65
   4  -1  -9  230.46   16.76
   4   1  -9  235.09   17.22
  -4  -1   9  258.99   17.44
  -4   1   9  256.26   16.32
   4   1  -8  831.62   34.65
   4   1  -8  840.66   34.62
  -4  -1   8  893.54   40.47
  -4   1   8  808.84   38.90
   4   1  -7  125.96    7.29
   4   1  -7  128.55    7.26
  -4   1   7  129.65    7.07
  -4  -1   7  132.15   10.32
  -4   1   7  131.61   10.08
   4   1  -6  625.52   27.62
   4   1  -6  633.34   27.59
  -4  -1   6  643.47   31.13
  -4   1   6  629.82   30.78
   4   1  -5  638.77   28.18
   4   1  -5  650.81   28.18
  -4  -1   5  661.36   31.29
  -4   1   5  662.18   31.15
  -4  -1   4 1428.50   61.87
  -4   1   4 1375.51   61.61
  -4   1   3   29.87    4.33
  -4  -1   3   28.49    4.55
  -4  -1   2   72.11    6.18
  -4   1   2   77.00    6.22
  -4   1   1 1732.99   74.97
  -4  -1   1 1756.21   74.94
   4  -1   0   57.57    5.06
   4   1   0   55.96    5.06
  -4  -1   0   56.19    5.10
  -4   1   0   57.48    5.13
   4   1   0   58.52    5.77
   4   1   1 2647.79  113.02
   4  -1   1 2732.63  113.09
   4   1   1 2640.18  114.00
   4   1   2   15.34    3.52
   4  -1   2   15.24    3.49
   4   1   2   12.91    3.82
   4   1   3 1164.47   52.44
  -4   1  -4   16.08    3.94
  -4  -1  -4    8.19    3.41
   4  -1   4   14.99    2.68
  -4   1  -5 1268.93   55.37
   4   1   5 1304.81   56.29
  -4  -1  -5 1226.71   51.82
  -4   1  -5 1216.30   51.81
  -4  -1  -5 1258.01   55.44
   4  -1   5 1239.67   53.43
  -4   1  -6  600.50   29.86
  -4  -1  -6  592.54   29.84
   4   1   6  638.15   30.79
   4  -1   6  589.87   27.71
   4   1   7  229.48   15.09
  -4   1  -7  199.63   10.42
  -4  -1  -7  231.95   10.51
  -4   1  -7  210.73   14.38
   4  -1   7  203.67   12.12
  -4  -1  -7  239.69   15.01
  -4  -1  -8  932.76   39.52
  -4   1  -8  969.16   45.42
  -4  -1  -8  993.63   45.79
   4   1   8 1022.81   46.26
  -4   1  -8  884.07   39.34
  -4  -1  -8  873.36   39.30
   4  -1   8  916.74   41.76
  -4  -1  -9    5.00    2.93
  -4   1  -9    8.38    2.97
  -4   1  -9    7.94    5.48
  -4  -1  -9    1.62    3.96
   4   1   9    8.65    4.84
  -4   1  -9    3.86    2.36
  -4  -1  -9    1.36    2.54
  -4  -1  -9    6.29    5.59
  -4   1 -10  660.93   32.24
  -4  -1 -10  690.85   32.40
  -4   1 -10  750.08   40.56
   4   1  10  609.08   38.12
  -4  -1 -10  699.26   40.21
  -4   1 -10  710.91   32.48
  -4  -1 -11  236.52   19.39
   4   1  11  194.31   16.90
  -4   1 -11  222.79   12.12
  -4   1 -11  215.36   18.53
  -4  -1 -11  212.88   11.93
  -4   1 -11  230.89   12.00
  -4  -1 -12   10.56    3.54
   4   1  12    2.92    4.68
  -4   1 -12   10.79    3.31
  -4   1 -12    8.41    3.35
  -4   1 -12   18.20    6.51
  -4   1 -12    8.05    2.06
  -4  -1 -12   20.78    7.28
   4   1  13  195.71   16.03
   4   1  14    8.82    4.40
  -4  -1 -14    2.88    2.65
  -4   1 -14    1.44    3.24
  -4  -1 -14   -0.97    4.65
  -4  -1 -14    3.91    2.58
   4   1  15  316.29   21.29
  -4   1 -15  321.95   16.27
  -4  -1 -15  343.48   15.95
  -4  -1 -15  365.20   23.30
  -4  -1 -15  323.48   16.15
  -4   1 -16    8.89    3.19
  -4  -1 -16   11.90    2.88
  -4  -1 -16   12.59    2.74
  -4   1 -17  216.61   11.35
  -4  -1 -17  209.42   10.81
  -4  -1 -17  211.18   10.85
  -4   1 -18   15.91    3.16
  -4  -1 -18    9.12    2.34
  -4  -1 -19  228.87   11.02
  -4  -1 -20  133.00    6.89
  -4   1 -21    9.24    1.68
   4   1  21    5.27    1.28
   4   2 -20    5.22    1.80
   4   2 -19  200.75    9.86
   4  -2 -19  183.34    9.11
   4  -2 -18   50.88    3.66
   4   2 -18   42.03    4.10
   4   2 -18   53.35    4.37
  -4   2  18   44.79    3.31
   4  -2 -17  381.60   17.34
   4   2 -17  388.19   18.11
   4   2 -17  399.55   18.26
  -4   2  17  351.64   17.14
  -4  -2  16   38.82    7.48
   4   2 -16   61.43    5.22
  -4   2  16   40.83    7.22
   4   2 -16   53.17    4.86
   4   2 -15  312.79   15.79
   4  -2 -15  275.61   20.73
  -4  -2  15  306.17   21.32
  -4   2  15  267.80   19.88
   4   2 -15  333.26   16.16
  -4  -2  14    1.95    5.37
   4   2 -14    4.46    3.42
   4   2 -14    2.72    2.99
  -4   2  14   -5.22    5.47
   4  -2 -14    0.98    3.99
  -4   2  14   -0.66    1.39
   4   2 -13  256.30   13.81
   4   2 -13  282.31   14.39
  -4   2  13  239.42   12.07
  -4  -2  13  246.76   19.78
   4   2 -12    1.36    3.58
   4   2 -12   -3.64    6.36
  -4   2  12    0.89    5.46
   4   2 -12    0.70    2.91
   4   2 -12    1.08    3.74
  -4   2  12    7.57    1.84
  -4  -2  12   -3.33    8.05
   4   2 -11   15.54    4.31
   4  -2 -11   15.77    5.84
   4   2 -11   15.13    4.42
  -4  -2  11   12.01    7.14
  -4   2  11   21.55    2.85
   4   2 -11   23.15    6.69
  -4   2  11   11.69    5.18
   4  -2 -10  137.25   12.98
   4   2 -10  155.87    9.74
   4   2 -10  150.53    9.76
   4   2 -10  174.18   15.05
  -4   2  10  148.85    8.64
  -4  -2  10  149.52   14.65
  -4   2  10  147.25   12.67
   4  -2  -9  107.92   11.35
   4   2  -9  121.78    7.85
   4   2  -9   99.78    6.79
   4  -2  -9  100.14    6.57
   4   2  -9   96.54   11.82
  -4   2   9   99.54    6.86
   4   2  -9  129.38    7.98
  -4   2   9  129.95   10.62
   4   2  -8  380.61   24.98
   4   2  -8  426.84   19.98
   4   2  -8  444.78   20.05
  -4  -2   8  458.65   24.48
  -4   2   8  390.31   19.40
   4  -2  -8  366.15   24.23
  -4   2   8  427.12   19.45
  -4   2   8  395.43   22.44
   4   2  -7 1624.69   70.58
   4  -2  -7 1678.86   75.73
   4   2  -7 1641.52   70.59
  -4   2   7 1670.74   70.44
  -4   2   7 1751.83   70.83
  -4  -2   7 1657.60   74.41
  -4   2   7 1560.61   73.18
  -4  -2   6   42.64    5.68
  -4   2   6   33.72    4.96
   4   2  -6   41.30    4.07
   4   2  -6   45.13    4.15
  -4   2   6   43.74    3.56
  -4   2   6   39.55    4.12
   4   2  -5 3408.50  143.01
  -4   2   5 3579.89  142.78
  -4   2   5 3230.22  143.31
  -4  -2   5 3418.06  145.65
  -4   2   5 3542.20  145.56
   4   2  -4  665.91   30.44
  -4   2   4  685.23   30.08
  -4   2   4  767.67   31.02
  -4  -2   4  671.38   32.54
  -4   2   4  672.14   32.48
  -4   2   3  952.69   41.58
  -4   2   3 1040.22   42.24
  -4  -2   3  942.54   43.87
  -4   2   3  957.89   43.83
  -4  -2   2  246.97   13.93
  -4   2   2  255.57   12.20
  -4   2   2  267.50   12.29
  -4   2   2  278.10   14.13
  -4   2   1  925.61   38.62
  -4   2   1  897.61   38.62
   4   2  -1  856.33   41.86
  -4   2   0   90.01    5.12
   4   2   0   88.63    7.90
   4   2   1  554.22   25.45
   4  -2   1  542.47   25.30
  -4   2  -1  536.51   23.50
   4   2   1  546.29   27.33
  -4   2  -1  533.40   23.39
  -4  -2  -2    2.96    2.73
  -4   2  -2    2.06    2.90
   4   2   2    3.48    2.50
   4  -2   2    2.72    2.37
  -4   2  -2    1.23    1.48
  -4   2  -2    1.07    1.37
  -4   2  -2    1.29    1.41
   4   2   3   21.64    3.90
   4  -2   3   26.86    3.92
  -4   2  -3   24.56    2.46
  -4   2  -3   24.87    2.43
  -4   2  -3   22.52    2.45
  -4   2  -3   24.38    4.46
  -4  -2  -3   23.83    4.13
  -4  -2  -4   32.31    4.92
  -4   2  -4   36.14    5.19
   4   2   4   35.84    4.88
   4  -2   4   32.98    4.41
  -4   2  -4   39.15    3.05
  -4   2  -4   34.92    3.00
   4   2   4   36.75    3.14
  -4   2  -5  497.31   22.13
  -4   2  -5  550.37   26.22
  -4   2  -5  514.00   22.36
   4   2   5  476.46   22.15
  -4  -2  -5  523.46   25.83
  -4   2  -6  249.56   15.77
   4   2   6  242.73   16.25
  -4   2  -6  237.42   11.27
  -4   2  -6  224.43   11.29
   4   2   6  225.56   11.17
  -4  -2  -6  227.48   15.04
  -4   2  -7 1076.17   44.02
  -4  -2  -7 1007.94   43.83
  -4   2  -7 1120.61   50.70
  -4  -2  -7 1067.95   50.09
   4   2   7 1076.85   51.09
  -4   2  -7 1015.93   43.96
   4   2   7  959.71   43.60
  -4   2  -8    1.87    3.08
  -4  -2  -8    3.47    6.01
   4   2   8    2.84    4.55
  -4   2  -8    0.90    6.18
  -4   2  -8    3.99    2.51
  -4  -2  -8    2.40    2.90
   4   2   8    1.83    1.92
  -4   2  -9 1285.08   55.73
  -4  -2  -9 1273.42   55.63
  -4   2  -9 1255.95   63.56
  -4  -2  -9 1317.17   63.70
   4   2   9 1450.05   65.83
  -4   2  -9 1310.08   56.12
  -4   2 -10   79.11    6.46
  -4   2 -10   93.62   11.68
   4   2  10   70.79   10.88
  -4   2 -10   95.87    6.44
  -4  -2 -10   95.06   11.56
   4   2  10   81.09    6.34
  -4  -2 -10   85.82    6.17
  -4   2 -11  996.36   42.64
  -4  -2 -11  988.12   42.58
   4   2  11  865.59   51.30
  -4   2 -11  966.77   43.34
   4   2  12   15.68    6.48
  -4   2 -12   18.24    3.92
   4   2  13  646.32   37.59
  -4   2 -13  628.81   28.77
  -4   2 -14   24.68    4.02
  -4  -2 -14   20.93    6.70
   4   2  14   26.71    6.79
  -4  -2 -15    1.89    4.63
  -4   2 -15    2.61    3.13
   4   2  15    6.85    4.60
  -4   2 -16   -0.22    2.46
  -4  -2 -16   -1.77    4.16
  -4  -2 -16    0.90    2.43
  -4   2 -17  110.97    6.70
  -4  -2 -17   96.02    6.30
  -4   2 -18   25.08    3.11
  -4  -2 -18   24.61    2.90
  -4  -2 -19  118.50    6.64
  -4   2 -19  133.34    6.91
   4   2  20   64.25    3.64
  -4   2 -20   55.76    3.72
  -4  -2 -20   52.19    3.55
   4   2  21   74.26    3.79
  -4   3  18  140.24    7.06
  -4   3  17   24.32    2.46
  -4   3  16  346.17   16.16
  -4   3  16  379.93   16.82
  -4   3  15  123.61    6.77
   4  -3 -14  360.14   23.81
  -4   3  14  407.86   18.43
   4  -3 -13  118.60   11.87
  -4   3  13  131.48    7.50
   4  -3 -12    5.90    3.98
  -4   3  12    8.26    2.23
  -4   3  11   63.23    4.99
   4  -3 -11   51.10    7.84
  -4   3  10   60.09    5.17
   4   3  -9  348.97   17.87
  -4   3   9  361.34   16.52
   4   3  -8  127.34    8.76
   4   3  -8  108.88   10.25
  -4   3   8  131.64    8.06
  -4   3   8  129.67    7.97
  -4   3   7   74.39    5.42
  -4   3   7   74.87    5.86
   4   3  -6  259.18   12.13
   4   3  -6  244.21   16.45
  -4   3   6  281.59   13.24
  -4   3   6  233.55   13.46
  -4   3   5   43.45    3.69
  -4   3   5   36.86    4.23
   4   3  -5   41.49    3.33
   4   3  -4 1022.43   43.91
  -4   3   4 1034.17   44.56
  -4   3   4 1046.66   45.25
  -4   3   3  297.03   14.09
  -4   3   3  308.02   14.48
  -4   3   3  315.65   15.16
   4   3  -2 1766.24   75.74
  -4   3   2 1738.32   75.71
  -4   3   2 1903.07   76.19
  -4   3   2 1856.42   76.14
  -4   3   1   31.34    2.91
  -4   3   1   24.39    2.68
   4   3  -1   22.16    2.61
  -4   3   1   23.62    2.66
  -4   3   1   21.94    2.67
  -4   3   0  775.08   35.09
   4   3   0  808.15   35.10
  -4   3   0  827.40   35.16
  -4   3   0  842.65   35.40
   4   3   0  813.90   39.73
  -4   3  -1  239.59   12.07
  -4   3  -1  241.04   11.97
   4   3   1  265.14   12.37
  -4   3  -1  267.04   12.41
  -4   3  -1  254.15   11.89
   4   3   1  243.57   16.22
   4   3   1  254.10   12.62
   4   3   2   10.68    4.35
   4   3   2   15.17    2.54
  -4   3  -2   17.99    2.29
   4   3   2   15.69    2.92
  -4   3  -2   18.64    2.17
  -4   3  -2   16.42    2.25
  -4   3  -3  602.59   26.02
  -4   3  -3  589.01   26.27
  -4   3  -3  569.86   26.18
   4   3   3  618.61   31.94
   4   3   3  596.57   26.79
  -4   3  -3  601.72   26.00
  -4   3  -4  205.14   10.11
  -4   3  -4  201.77   10.23
  -4   3  -4  189.48    9.97
   4   3   4  218.44   10.87
   4   3   4  192.19   14.90
   4   3   5  241.58   11.80
  -4   3  -5  265.93   12.27
  -4   3  -5  256.55   12.19
   4   3   5  252.60   12.69
   4   3   5  245.66   17.25
   4   3   6  431.44   19.87
  -4   3  -6  458.33   20.48
  -4   3  -6  478.27   20.41
   4   3   6  437.82   20.52
   4   3   6  423.95   26.02
  -4   3  -7    6.17    2.87
   4   3   7    7.01    2.60
   4   3   7   11.11    5.76
  -4   3  -8  399.69   19.16
  -4   3  -8  423.47   19.32
  -4   3  -8  412.07   20.37
   4   3   8  460.71   20.35
   4   3   9    6.50    3.79
  -4   3  -9    5.00    2.22
  -4   3  -9    8.02    2.74
   4   3   9   11.36    3.22
  -4   3  -9    6.65    3.45
  -4   3 -10  518.99   25.11
   4   3  10  572.79   36.74
  -4   3 -10  609.03   26.44
   4   3  10  576.74   27.19
  -4   3 -10  561.83   25.08
  -4   3 -11    6.42    2.50
  -4   3 -11    8.45    3.02
   4   3  11   11.90    3.87
  -4   3 -12  955.29   40.55
   4   3  12  877.03   51.73
  -4   3 -12  912.70   40.77
   4   3  12  869.39   41.59
  -4  -3 -12 1017.75   41.87
  -4   3 -13    4.99    2.26
  -4  -3 -13    5.31    4.68
  -4   3 -13   11.53    3.15
  -4  -3 -13    8.48    3.08
   4   3  14   98.60   12.98
  -4   3 -14  129.16    7.31
  -4  -3 -14  104.28   12.05
  -4   3 -14  127.17    7.81
  -4  -3 -14  127.37    7.86
  -4   3 -15   62.16    4.80
  -4   3 -15   72.78    5.53
  -4  -3 -15   76.19    5.43
  -4   3 -16   26.70    3.10
  -4  -3 -16   24.54    3.10
  -4  -3 -17   50.54    3.98
   4   3  17   58.79    4.00
  -4   3 -17   48.49    3.80
   4   3  17   50.48    3.65
   4   3  18   74.90    4.46
   4   3  18   86.10    4.76
  -4  -3 -18   86.07    4.95
   4   3  19   36.07    2.53
   4   3  20   75.57    3.69
  -4   4  17   45.88    3.06
  -4   4  17   52.85    3.23
  -4   4  16   47.55    3.32
  -4   4  16   44.48    2.97
  -4   4  15    3.42    1.58
  -4   4  15    3.34    1.33
  -4   4  14   94.23    5.81
  -4   4  14   89.61    5.47
  -4   4  13    0.20    1.56
  -4   4  13    2.28    2.14
  -4   4  12  328.05   15.98
  -4   4  11   60.75    5.11
  -4   4  10  464.33   21.50
   4   4 -10  430.29   20.05
  -4   4   9   43.12    4.77
   4   4  -9   43.36    3.90
  -4   4   8  530.61   26.14
  -4   4   8  551.11   26.17
   4   4  -8  581.47   25.51
  -4   4   7  202.88   11.49
  -4   4   7  202.91   11.71
   4   4  -7  206.46   11.21
   4   4  -6  184.09    9.29
   4   4  -6  162.20   10.29
  -4   4   6  179.05   10.19
  -4   4   6  155.97   10.44
   4   4  -6  185.27   10.50
  -4   4   6  179.48    9.81
  -4   4   5  256.57   13.14
  -4   4   5  276.65   14.58
   4   4  -5  243.04   14.06
  -4   4   5  276.33   13.53
   4   4  -5  284.21   13.17
   4   4  -4   28.01    4.35
   4   4  -4   32.10    3.32
  -4   4   4   29.01    3.18
  -4   4   4   31.21    3.37
  -4   4   4   33.92    3.49
   4   4  -3    7.85    2.28
  -4   4   3    4.82    2.19
  -4   4   3    4.60    2.03
  -4   4   3   10.02    2.52
   4   4  -3    7.37    3.30
  -4   4   3    5.45    2.06
  -4   4   2  244.66   12.30
  -4   4   2  241.61   12.34
  -4   4   2  245.57   12.44
  -4   4   2  243.38   12.55
   4   4  -2  252.63   13.53
   4   4  -2  250.69   12.35
  -4   4   1    8.04    1.86
  -4   4   1    8.09    2.03
  -4   4   1    9.70    2.16
  -4   4   1    8.58    2.24
   4   4  -1    9.10    3.61
   4   4   0  495.66   21.90
  -4   4   0  466.50   21.52
  -4   4   0  498.54   21.95
  -4   4   0  445.23   21.31
  -4   4   0  460.54   21.00
   4   4   1   54.24    4.54
  -4   4  -1   44.66    3.88
  -4   4  -1   44.91    3.95
  -4   4  -2  834.98   37.93
  -4   4  -2  880.93   38.21
   4   4   2  877.10   44.37
   4   4   2  877.08   38.98
   4   4   2  907.65   38.60
   4   4   3   19.29    3.21
  -4   4  -3   15.66    2.45
  -4   4  -3   18.80    2.65
   4   4   3   16.79    5.63
   4   4   3   20.82    3.68
  -4   4  -4  996.29   44.54
   4   4   4 1021.58   51.52
   4   4   4 1102.58   45.97
   4   4   5  127.51    7.31
  -4   4  -5  127.07    7.56
   4   4   5  155.33   10.61
   4   4   5  155.91    9.11
   4   4   5  133.82   13.00
   4   4   6  467.05   29.58
   4   4   6  527.84   24.48
   4   4   6  537.94   25.91
   4   4   6  488.65   22.50
   4   4   7   74.72    7.62
   4   4   7   76.47    6.15
   4   4   7   60.81    9.74
   4   4   7   78.84    5.09
   4   4   7   77.44    6.61
   4   4   8    5.72    2.95
   4   4   8    4.36    5.53
   4   4   8    6.15    3.63
   4   4   8    5.02    4.70
   4   4   8    5.86    2.26
  -4  -4  -8    3.67    2.74
   4   4   9  137.93    9.10
  -4  -4  -9  137.75    8.24
   4   4   9  134.96   10.37
   4   4   9  138.94    7.99
   4   4   9  135.29   14.85
   4   4  10  261.91   12.86
   4   4  10  250.31   13.88
   4   4  10  249.35   21.40
  -4  -4 -10  250.81   12.82
   4   4  10  229.39   14.48
   4   4  11   18.88    4.37
   4   4  11   10.48    3.43
  -4  -4 -11   17.41    2.93
   4   4  11   14.20    3.10
   4   4  11   13.51    7.24
   4   4  12  183.06   10.77
   4   4  12  173.06   10.22
  -4  -4 -12  189.72   10.04
   4   4  13    4.51    2.23
   4   4  13    4.83    2.42
   4   4  13    2.76    2.55
  -4  -4 -13    4.85    2.21
   4   4  14  240.70   11.94
   4   4  14  236.88   11.87
  -4  -4 -14  243.92   11.77
   4   4  15   28.40    2.64
   4   4  15   26.93    2.73
  -4  -4 -16  231.37   10.33
   4   4  16  204.39   10.02
  -4  -4 -17   -0.19    1.12
  -4   5  14   32.51    2.50
  -4   5  14   30.90    2.56
  -4   5  13  284.58   13.33
  -4   5  13  285.72   13.11
  -4   5  13  281.06   13.26
  -4   5  12   11.70    2.27
  -4   5  12   11.25    2.13
  -4   5  12   11.80    2.08
  -4   5  11  342.89   17.10
  -4   5  11  398.86   17.35
  -4   5  11  354.90   17.21
  -4   5  10    1.53    1.99
  -4   5  10    3.04    2.22
  -4   5  10    2.74    2.15
  -4   5   9  281.81   13.38
  -4   5   9  267.00   13.39
  -4   5   9  242.20   13.41
  -4   5   8   25.70    3.08
  -4   5   8   20.99    2.95
   4   5  -7  122.74    7.64
  -4   5   7  136.23    7.66
  -4   5   7  130.23    7.66
  -4   5   6   13.44    2.55
  -4   5   6   19.11    2.94
  -4   5   6   15.69    2.65
   4   5  -6   22.44    3.45
  -4   5   5   73.02    5.04
  -4   5   5   76.70    5.43
   4   5  -5   69.86    5.12
   4   5  -5   70.69    5.95
  -4   5   5   67.18    4.84
   4   5  -4   18.22    2.83
   4   5  -4   12.29    4.00
  -4   5   4   10.87    2.26
  -4   5   4   14.39    2.48
  -4   5   4   15.30    2.76
   4   5  -4   16.11    3.94
   4   5  -3    2.48    3.90
   4   5  -3    3.69    2.25
  -4   5   3    1.29    1.70
  -4   5   3    3.11    2.07
   4   5  -3    3.84    3.39
  -4   5   3    3.35    1.88
   4   5  -2    4.71    4.55
   4   5  -2   14.20    2.91
  -4   5   2   12.59    2.43
  -4   5   2   12.11    2.14
  -4   5   2   16.92    2.82
   4   5  -2   21.48    4.55
   4   5  -1  405.24   18.90
   4   5  -1  406.06   20.21
  -4   5   1  381.29   18.42
  -4   5   1  386.78   18.73
   4   5  -1  402.35   22.11
   4   5   0   15.40    6.17
   4   5   0   17.87    3.37
   4   5   0   18.38    4.35
  -4   5   0   12.71    2.42
  -4   5   0   11.97    2.44
   4   5   1  981.19   40.65
  -4   5  -1  892.55   39.77
  -4   5  -1  935.73   40.17
  -4   5  -2   49.39    3.97
   4   5   2   48.74    8.27
  -4   5  -3  565.52   25.37
   4   5   3  579.42   27.27
   4   5   4    7.20    3.37
   4   5   5  294.17   15.58
   4   5   5  269.10   16.96
   4   5   6    4.93    3.58
   4   5   6    5.16    4.39
   4   5   7   85.94    6.12
   4   5   7   64.76    7.24
   4   5   8    5.43    2.64
   4   5   8    6.84    3.78
   4   5   9   39.92    4.37
   4   5   9   33.99    4.83
   4   5  10   79.83    6.38
   4   5  10   88.37    6.14
   4   5  11   15.27    2.78
   4   5  11   13.38    2.88
   4   5  12   18.52    2.56
   4   5  12   18.40    2.72
   4   5  12   16.55    2.28
   4   5  13  239.05   10.58
   4   5  13  205.02   10.36
   4   5  14    4.21    1.15
  -4   6   9   49.67    3.55
  -4   6   8   35.31    3.03
  -4   6   7  155.18    8.12
  -4   6   6   18.02    2.35
  -4   6   5  239.65   11.61
  -4   6   4    0.32    1.37
  -4   6   3  404.64   18.01
   4   6  -3  381.32   19.10
   4   6  -2   53.19    4.00
   4   6  -2   41.00    5.05
  -4   6   2   43.49    3.45
   4   6  -1   35.65    5.13
   4   6  -1   49.03    3.87
   4   6  -1   43.40    4.63
   4   6   0   47.85    3.87
   4   6   0   38.25    5.03
   4   6   1   10.35    4.04
   4   6   1    9.64    2.25
   4   6   2  189.82    9.55
   4   6   2  171.12   11.52
   4   6   3    1.13    3.60
   4   6   3   -0.35    1.82
   4   6   3    0.97    1.52
   4   6   4  138.19    9.01
   4   6   4  110.27    6.75
   4   6   5   41.73    3.74
   4   6   6   50.73    4.90
   4   6   6   47.14    4.00
   4   6   7  239.01   12.07
   4   6   7  247.32   11.62
   4   6   7  219.39   11.47
   4   6   8   30.09    3.15
   4   6   8   23.25    2.78
   4   6   8   29.89    2.83
   4   6   9  380.81   16.80
   4   6   9  365.46   16.70
   5   0 -20   55.79    3.79
   5   0 -20   41.90    3.22
   5   0 -19   -0.18    1.85
   5   0 -19    0.43    1.67
   5   0 -18  326.02   15.54
   5   0 -18  323.71   15.23
   5   0 -17    0.77    2.07
   5   0 -17    3.03    2.36
   5   0 -16  962.22   42.46
   5   0 -16  976.02   42.22
   5   0 -16  976.13   49.85
  -5   0  16  967.98   49.48
  -5   0  15   -6.98    5.74
   5   0 -15   -0.70    2.42
   5   0 -15   -0.50    2.54
   5   0 -14  532.50   32.01
   5   0 -14  509.24   24.32
   5   0 -14  536.59   24.25
  -5   0  14  497.55   31.55
  -5   0  13   -2.25    6.09
   5   0 -13    3.93    3.07
   5   0 -13   -4.48    5.88
   5   0 -13    1.56    2.75
   5   0 -12   19.50    3.72
   5   0 -12   20.41    3.75
   5   0 -12   14.04    6.59
   5   0 -12   20.03    3.62
  -5   0  12   23.74    7.71
   5   0 -11    0.74    2.49
  -5   0  11   10.75    5.16
   5   0 -11    1.19    3.17
   5   0 -11   -1.58    2.76
   5   0 -11   16.05    6.32
   5   0 -10   17.05    3.65
   5   0 -10   25.96    3.71
   5   0 -10   29.27    7.87
   5   0 -10   28.71    3.61
  -5   0  10   15.29    6.22
  -5   0   9   -0.82    4.52
   5   0  -9   -0.24    2.72
   5   0  -9   -0.18    2.04
   5   0  -9    0.61    2.37
  -5   0   9   -0.42    1.93
  -5   0   8   16.67    4.91
   5   0  -8   12.52    2.88
   5   0  -8    5.87    2.24
  -5   0   8    4.84    2.01
  -5   0   7    1.20    3.98
   5   0  -7    2.58    2.12
   5   0  -7   -0.15    1.82
  -5   0   7   -0.17    1.78
   5   0  -6 1522.04   64.14
   5   0  -6 1463.96   63.81
  -5   0   6 1617.02   64.26
  -5   0   6 1454.01   68.20
   5   0  -5   -0.14    1.84
  -5   0   5   -1.97    3.54
   5   0  -4 3422.35  143.41
  -5   0   4 3614.87  147.59
  -5   0   3    3.97    3.49
  -5   0   2 1853.92   77.63
  -5   0   2 1904.11   81.19
  -5   0   1   -0.75    2.97
   5   0  -1    0.74    2.48
   5   0   0  384.33   19.69
  -5   0   0  388.95   19.89
  -5   0  -1    0.36    1.72
   5   0   1    0.73    2.43
   5   0   2  480.11   23.64
  -5   0  -2  459.14   22.31
  -5   0  -2  466.28   20.47
   5   0   2  488.60   23.54
  -5   0  -3    0.37    2.79
   5   0   3   -0.43    3.25
  -5   0  -3    0.11    1.54
   5   0   3   -0.78    2.83
  -5   0  -4  130.96    9.65
  -5   0  -4  128.02    6.64
   5   0   4  119.70    9.08
  -5   0  -4  145.54   10.32
  -5   0  -5    0.51    4.11
  -5   0  -5   -0.50    3.52
  -5   0  -5    1.95    1.66
   5   0   5   -0.86    3.07
  -5   0  -6 1716.52   72.99
  -5   0  -6 1633.63   72.81
  -5   0  -6 1608.55   68.13
   5   0   6 1597.61   71.88
  -5   0  -7   -0.59    3.14
  -5   0  -7    0.15    1.88
  -5   0  -7    1.83    4.01
   5   0   7    0.53    3.08
  -5   0  -8 3049.37  133.88
  -5   0  -8 3053.14  132.91
  -5   0  -8 3064.01  127.70
   5   0   8 3093.69  132.82
  -5   0  -9    1.83    2.32
  -5   0  -9    0.69    3.74
  -5   0  -9    4.27    5.56
  -5   0 -10 1625.90   71.03
  -5   0 -10 1713.08   76.71
  -5   0 -10 1664.01   79.74
  -5   0 -10 1685.62   71.07
  -5   0 -11    2.22    3.39
  -5   0 -11    8.55    7.22
  -5   0 -11   -4.86    4.33
  -5   0 -11    1.66    3.03
  -5   0 -12  403.93   29.11
  -5   0 -12  464.55   20.87
  -5   0 -12  396.32   20.67
  -5   0 -13    2.46    3.68
   5   0  13   -0.86    3.76
  -5   0 -13    1.22    6.64
  -5   0 -14  380.48   18.04
  -5   0 -15   -0.23    2.98
  -5   0 -15    1.38    2.03
  -5   0 -16   -0.87    2.81
  -5   0 -16    2.60    1.92
  -5   0 -17   -0.81    2.70
  -5   0 -17   -1.05    1.72
  -5   0 -18   11.05    2.87
   5   0  19   -0.22    1.42
   5   0  20   84.63    4.66
  -5   0 -20  112.74    5.57
   5  -1 -20    2.44    1.42
   5   1 -20    3.93    1.73
   5  -1 -19  107.89    6.11
   5   1 -19  106.50    6.29
   5  -1 -18   -0.69    1.79
   5   1 -18    2.68    2.13
   5   1 -17  218.96   11.33
   5  -1 -17  215.59   10.98
   5  -1 -16    2.08    2.12
   5  -1 -16    2.55    1.91
   5   1 -16    1.71    2.57
  -5   1  16    3.43    4.03
   5   1 -16    3.59    2.72
  -5  -1  16    1.76    4.13
   5  -1 -15  226.50   11.80
   5   1 -15  238.88   12.60
   5  -1 -15  246.21   11.55
   5   1 -15  241.16   12.49
  -5   1  15  207.92   10.96
   5   1 -15  209.46   16.94
  -5  -1  15  212.15   17.99
  -5   1  15  198.17   17.26
   5  -1 -14   31.93    3.83
   5   1 -14   34.44    4.62
   5  -1 -14   20.49    6.99
   5  -1 -14   29.49    3.45
   5   1 -14   30.52    4.34
  -5   1  14   26.35    2.97
  -5   1  14   36.18    8.04
  -5  -1  14   31.70    8.28
   5   1 -14   36.57    8.65
   5  -1 -13  209.25   11.44
   5  -1 -13  223.09   18.12
   5   1 -13  215.50   18.72
   5   1 -13  224.36   12.61
   5  -1 -13  206.89   11.12
   5   1 -13  228.45   12.51
  -5  -1  13  216.16   19.27
  -5   1  13  201.95   17.72
  -5   1  13  205.89   10.92
   5   1 -12  361.34   17.85
   5  -1 -12  342.14   17.57
   5  -1 -12  384.70   18.03
   5  -1 -12  369.28   25.09
   5  -1 -12  370.31   17.47
   5   1 -12  368.80   18.77
   5   1 -12  367.62   25.62
   5   1 -12  393.48   19.10
  -5  -1  12  328.27   25.00
  -5   1  12  313.58   23.63
  -5  -1  11   -1.18    6.98
  -5   1  11   -0.99    6.25
   5   1 -11    9.44    3.90
   5  -1 -11    4.87    2.40
   5   1 -11    4.87    3.54
   5  -1 -11   -3.35    7.65
   5   1 -11   -5.98    7.70
   5   1 -11    4.56    2.96
   5  -1 -11    4.32    2.77
   5   1 -10  399.80   20.70
   5  -1 -10  429.92   27.36
   5   1 -10  444.79   28.13
   5   1 -10  444.96   20.83
   5   1 -10  428.62   19.99
   5  -1 -10  406.29   19.73
  -5  -1  10  438.42   27.77
  -5   1  10  450.55   26.45
   5   1  -9  192.86   10.83
   5  -1  -9  188.81   10.16
   5   1  -9  202.88   10.75
  -5   1   9  168.24    9.76
   5   1  -9  186.95    9.92
  -5  -1   9  217.90   16.44
   5  -1  -9  193.84    9.86
  -5   1   9  188.48   14.67
   5  -1  -8  451.30   19.73
   5   1  -8  446.73   20.14
   5   1  -8  453.57   20.38
  -5  -1   8  464.46   25.58
  -5   1   8  453.47   24.72
   5  -1  -7  637.76   29.13
   5   1  -7  675.07   29.91
   5   1  -7  666.80   29.68
  -5   1   7  663.04   29.59
  -5  -1   7  738.74   34.80
  -5   1   7  650.85   33.72
  -5   1   7  708.47   29.87
  -5   1   6   15.34    4.35
   5   1  -6   23.43    3.11
   5  -1  -6   13.65    2.08
   5   1  -6   14.44    2.62
  -5  -1   6   12.69    4.50
  -5   1   6   11.80    2.25
  -5   1   6   12.58    2.21
   5   1  -5  641.95   27.94
  -5   1   5  619.09   31.24
  -5  -1   5  620.19   31.33
   5   1  -5  613.75   28.01
  -5   1   5  665.01   27.82
  -5   1   5  625.10   27.77
   5   1  -4   98.44    6.35
   5   1  -4  107.74    6.39
  -5   1   4  116.06    6.11
  -5  -1   4  125.52    9.27
  -5   1   4  110.80    8.87
  -5   1   4  114.07    6.15
  -5   1   3 1324.48   55.68
  -5   1   3 1361.82   55.96
  -5  -1   3 1333.88   59.50
  -5   1   3 1312.35   59.36
  -5   1   3 1299.37   55.93
  -5  -1   3 1323.09   55.74
  -5  -1   2   26.11    4.70
  -5   1   2   23.47    4.34
  -5  -1   2   22.52    2.31
  -5   1   2   24.61    2.33
  -5   1   2   19.86    2.28
  -5   1   2   24.00    2.39
  -5   1   2   27.71    2.54
  -5  -1   1  584.32   25.82
  -5   1   1  588.06   25.81
  -5   1   1  629.27   26.15
  -5  -1   1  587.54   28.88
  -5   1   1  609.56   26.28
  -5   1   1  624.51   26.25
  -5   1   1  586.64   28.89
   5   1   0  578.43   28.18
   5  -1   0  582.22   28.11
  -5   1   0  594.40   25.55
  -5  -1   0  562.12   25.23
  -5   1   0  598.45   25.57
  -5   1   0  606.93   25.78
  -5   1   0  604.13   25.73
   5   1   0  587.21   29.15
   5  -1   1  421.89   21.36
   5   1   1  429.65   21.48
  -5   1  -1  426.43   18.77
  -5  -1  -1  405.34   18.47
  -5   1  -1  430.74   18.56
  -5   1  -1  433.39   18.96
   5   1   1  433.65   22.48
   5   1   2 1107.05   50.86
   5  -1   2 1137.85   50.91
  -5   1  -2 1138.18   47.90
  -5  -1  -2 1093.10   47.58
  -5   1  -2 1165.89   47.69
   5   1   2 1179.56   52.11
   5   1   3    5.70    3.48
   5  -1   3    8.16    3.68
  -5   1  -3    5.21    1.55
   5   1   3    8.15    3.89
  -5  -1  -3    9.14    1.77
  -5   1  -3   10.64    1.83
  -5  -1  -4  569.72   29.20
   5   1   4  623.41   29.49
   5  -1   4  596.58   29.22
  -5   1  -4  600.64   29.42
  -5   1  -4  593.88   25.82
  -5  -1  -4  584.98   25.49
  -5   1  -4  578.54   25.50
   5   1   4  618.19   30.04
  -5   1  -5   54.45    6.25
  -5   1  -5   60.73    3.96
   5   1   5   48.60    6.44
  -5  -1  -5   49.77    3.54
  -5   1  -5   53.46    3.68
   5  -1   5   44.18    4.93
  -5  -1  -5   60.91    6.51
  -5  -1  -6   69.66    4.21
  -5  -1  -6   63.15    7.43
  -5   1  -6   68.66    7.72
   5   1   6   58.16    7.44
   5  -1   6   63.39    5.97
  -5   1  -7  552.27   28.20
  -5  -1  -7  521.21   27.99
  -5  -1  -7  449.69   27.75
  -5   1  -7  514.51   23.16
  -5  -1  -7  523.88   22.93
   5  -1   7  530.01   25.70
   5   1   7  523.96   28.39
  -5   1  -8   50.60    7.77
  -5  -1  -8   71.73    8.91
  -5  -1  -8   54.78    7.89
  -5   1  -8   62.25    4.68
   5  -1   8   60.41    6.38
  -5  -1  -8   64.12    4.66
  -5   1  -9  689.22   30.48
  -5  -1  -9  698.68   30.57
  -5  -1  -9  739.25   38.11
  -5  -1  -9  775.84   37.24
  -5   1  -9  718.13   37.76
  -5   1  -9  665.96   30.44
  -5  -1  -9  635.36   30.25
  -5   1 -10    5.01    3.38
  -5  -1 -10    5.89    3.46
  -5  -1 -10    2.22    6.84
  -5  -1 -10    3.44    4.37
  -5   1 -10   -1.09    6.77
  -5   1 -10    5.43    3.19
  -5  -1 -10    5.74    2.83
  -5   1 -11  815.08   37.52
  -5  -1 -11  836.04   37.68
  -5  -1 -11  856.72   47.60
  -5   1 -11  826.90   37.84
  -5   1 -11  789.60   46.34
  -5   1 -12    5.38    3.52
  -5  -1 -12    7.70    3.83
  -5   1 -12    2.41    7.76
  -5  -1 -12    8.48    5.12
  -5   1 -12    4.87    3.37
  -5   1 -12    0.52    1.94
  -5  -1 -13  153.28    9.26
  -5  -1 -13  127.37   15.13
  -5  -1 -13  153.96   14.31
  -5   1 -13  118.97   14.74
  -5   1 -13  154.11    9.18
  -5  -1 -14  327.29   16.47
  -5   1 -14  330.78   16.58
  -5  -1 -14  332.75   22.99
  -5  -1 -15   16.63    3.16
  -5   1 -15   13.78    3.45
  -5  -1 -15    8.89    2.88
   5   1  15    8.06    4.49
  -5   1 -16  221.21   11.97
  -5  -1 -16  237.06   11.58
  -5  -1 -16  227.77   11.80
  -5   1 -17    3.55    2.72
  -5  -1 -17    1.84    2.19
  -5  -1 -17    1.33    1.98
  -5   1 -18  258.69   12.52
  -5  -1 -18  240.84   11.94
   5   1  19   60.71    3.96
  -5  -1 -20   10.89    1.75
   5   1  20    8.45    1.58
   5   1  21   91.43    4.38
   5  -2 -19   74.16    4.32
  -5  -2  19   81.39    4.35
   5  -2 -18   -0.49    1.42
   5   2 -18    0.96    2.16
   5  -2 -17    4.67    1.73
  -5   2  17    5.75    1.54
   5   2 -16    0.26    2.52
   5  -2 -16    4.50    1.99
   5   2 -16    5.79    3.02
  -5   2  16    3.57    1.66
   5  -2 -15  115.83    6.63
   5   2 -15  114.22    7.76
   5   2 -15  112.45    7.83
  -5   2  15   99.94   10.65
   5  -2 -15  108.52   11.66
  -5  -2  15   96.14   11.00
  -5   2  15  104.30    6.42
  -5  -2  14   60.77    9.69
  -5   2  14   62.01    8.74
   5   2 -14   70.55    6.51
   5   2 -14   70.71    6.63
   5  -2 -14   65.58    4.92
   5  -2 -14   60.91    9.27
  -5   2  14   60.84    4.75
   5  -2 -13  473.44   21.15
   5   2 -13  486.52   23.06
   5   2 -13  474.85   23.06
  -5   2  13  434.39   20.47
  -5  -2  13  454.29   29.91
   5   2 -12   31.08    5.20
  -5   2  12   21.66    6.63
   5  -2 -12   33.46    3.84
   5   2 -12   32.76    7.48
   5   2 -12   27.24    5.31
  -5  -2  12   13.27    8.11
  -5   2  12   33.60    3.21
   5  -2 -12   24.43    6.50
   5  -2 -11  573.19   31.35
   5   2 -11  625.17   33.09
   5   2 -11  464.13   25.26
   5   2 -11  444.29   25.05
  -5   2  11  567.58   23.90
  -5  -2  11  453.50   31.54
  -5   2  11  556.44   30.56
   5   2 -10  127.97    9.13
   5   2 -10  115.20    7.53
   5  -2 -10  118.51    7.42
   5   2 -10  141.46    9.22
   5  -2 -10  110.03   12.61
   5   2 -10   93.27   12.81
  -5   2  10  124.87    7.52
  -5  -2  10  120.55   13.34
  -5   2  10  108.02   11.11
   5  -2  -9 1000.73   51.45
   5   2  -9  992.97   52.10
   5   2  -9 1215.57   45.49
   5   2  -9  941.34   43.54
  -5  -2   9 1255.26   52.73
   5  -2  -9  930.00   43.36
  -5   2   9  922.61   43.78
   5  -2  -9 1024.11   43.27
  -5   2   9 1099.51   49.27
  -5  -2   8   39.48    7.03
   5   2  -8   35.97    4.52
   5  -2  -8   43.46    7.83
   5   2  -8   32.33    7.51
  -5   2   8   32.94    5.63
   5   2  -8   37.09    3.93
   5  -2  -8   39.03    3.64
  -5   2   8   30.57    3.67
   5   2  -7  898.60   38.97
  -5   2   7  846.48   41.88
  -5   2   7  862.04   38.50
  -5  -2   7  900.63   43.07
   5   2  -6  155.80    9.00
  -5   2   6  155.80    8.53
  -5  -2   6  133.33   11.00
  -5   2   6  161.07   11.19
  -5  -2   5  819.90   36.09
  -5   2   5  846.58   36.02
  -5   2   5  851.17   36.71
  -5  -2   5  842.07   40.23
  -5   2   5  878.41   40.10
  -5   2   5  851.76   36.68
  -5  -2   4   14.33    3.81
  -5   2   4   14.29    3.93
  -5  -2   4   14.94    2.08
  -5   2   4   17.36    2.05
  -5   2   4   15.74    2.32
  -5   2   4   14.66    2.24
  -5  -2   3   20.82    4.21
  -5   2   3   19.25    3.93
  -5  -2   3   14.61    2.07
  -5   2   3   22.55    2.52
  -5   2   3   20.15    2.14
  -5  -2   2    2.89    2.87
  -5   2   2    7.70    1.81
  -5  -2   2    4.96    1.46
  -5   2   2    4.48    1.45
  -5   2   2    5.49    1.59
   5   2  -1  486.63   22.63
  -5   2   1  540.46   23.30
  -5  -2   1  513.99   22.67
  -5   2   1  532.69   22.66
  -5   2   1  552.68   23.41
  -5   2   1  550.46   23.43
  -5   2   0    6.28    1.75
  -5   2   0    5.89    1.82
  -5  -2   0    9.99    1.50
  -5   2   0   10.89    1.49
  -5   2   0    4.98    1.82
   5   2   0    3.94    3.75
   5  -2   1 2082.51   88.65
  -5  -2  -1 2057.36   85.38
  -5   2  -1 2049.79   85.35
  -5   2  -1 2047.52   85.81
  -5   2  -1 2024.05   86.00
   5   2   1 2110.34   88.85
   5   2   2   77.53    6.84
  -5   2  -2   74.14    7.03
   5  -2   2   63.42    6.21
  -5  -2  -2   80.23    4.27
  -5   2  -2   69.03    4.16
  -5  -2  -2   74.65    7.12
  -5   2  -2   67.50    4.45
  -5   2  -3 1463.66   63.79
  -5  -2  -3 1401.83   63.77
   5  -2   3 1343.97   63.07
  -5  -2  -3 1415.36   59.84
  -5   2  -3 1405.16   59.85
   5   2   3 1540.51   63.93
  -5   2  -3 1476.20   60.42
  -5   2  -4   14.07    2.28
  -5   2  -4   18.03    4.14
  -5  -2  -4    7.64    3.70
   5   2   4   15.34    3.94
   5  -2   4   16.49    3.79
  -5   2  -4   11.67    2.18
  -5  -2  -4   12.88    1.95
  -5   2  -4   12.91    2.00
   5   2   4   12.96    2.51
  -5  -2  -5 1241.80   57.38
   5   2   5 1288.96   57.31
   5  -2   5 1199.24   56.71
  -5   2  -5 1284.99   57.62
  -5   2  -5 1259.11   53.48
   5   2   5 1236.68   53.28
   5   2   5 1323.89   59.53
  -5  -2  -6  250.31   16.55
   5   2   6  249.77   15.74
   5  -2   6  251.56   15.67
  -5   2  -6  255.29   12.28
  -5   2  -6  258.17   12.49
   5   2   6  242.95   12.11
   5   2   6  244.04   17.16
  -5   2  -6  254.05   16.74
  -5   2  -7  674.12   34.53
  -5   2  -7  627.27   28.29
   5   2   7  632.43   34.64
  -5  -2  -7  703.41   34.69
   5   2   7  623.86   28.01
  -5   2  -8   98.85    6.48
  -5  -2  -8   75.69    6.14
  -5   2  -8  100.77   11.69
  -5  -2  -8   77.44   10.73
  -5   2  -8   90.98    6.12
   5   2   8   88.84    5.66
   5   2   8  117.38   12.13
  -5   2  -9  128.00    8.31
  -5  -2  -9  120.76    8.26
  -5  -2  -9  120.96   14.05
  -5   2  -9  154.33    8.57
  -5   2  -9  112.30   14.21
  -5  -2 -10  167.79    9.80
  -5   2 -10  173.44   16.80
  -5  -2 -10  152.53   16.04
  -5   2 -10  180.68    9.94
  -5   2 -10  157.26   10.04
  -5   2 -11   88.37    6.38
  -5  -2 -11   73.39    6.06
  -5   2 -11   78.06   11.41
  -5  -2 -11   82.09   11.56
  -5  -2 -11   60.25    9.76
  -5   2 -11   76.79    6.62
  -5  -2 -12   73.43   10.26
  -5  -2 -13  166.34   15.52
  -5   2 -13  173.77   10.11
  -5   2 -14  121.30    7.83
   5   2  14  125.47   13.64
  -5   2 -15  564.50   25.71
   5   2  15  556.18   33.26
  -5   2 -16   78.41    5.83
  -5  -2 -16   77.12    5.59
  -5   2 -16   85.89    5.64
  -5   2 -17  508.24   21.71
  -5  -2 -17  447.14   21.50
   5   2  18   22.89    2.64
  -5   2 -18   24.41    2.82
  -5  -2 -18   22.17    2.71
   5   2  19  239.19   10.23
  -5   2 -19  217.21   10.23
   5   2  20   37.99    2.54
  -5   3  18   26.05    2.14
  -5   3  18   28.18    2.23
  -5   3  17   40.31    3.09
  -5   3  16   90.86    5.43
  -5   3  15   56.93    3.80
  -5   3  15   60.60    4.32
  -5   3  14  141.41    7.86
  -5   3  14  127.07    7.18
   5  -3 -13  183.76   15.32
  -5   3  13  227.05   10.92
  -5   3  13  203.42   11.27
  -5   3  12  175.04    9.46
  -5   3  12  178.48   10.17
  -5   3  11    0.26    2.05
  -5   3  10  505.18   23.87
  -5   3   9  162.67    9.75
  -5   3   8  536.20   25.24
   5   3  -7  348.47   23.93
  -5   3   7  439.13   20.09
   5   3  -6  431.61   28.03
  -5   3   6  544.77   23.98
   5   3  -5  187.62    9.37
   5   3  -5  173.19   14.30
  -5   3   5  215.53   10.71
   5   3  -4  137.75    7.26
   5   3  -4  139.36    7.59
  -5   3   4  141.62    8.15
  -5   3   4  144.73    8.00
  -5   3   3  115.68    6.82
   5   3  -3  109.73    6.38
  -5   3   3  114.30    6.82
   5   3  -2  319.90   14.88
   5   3  -2  314.42   14.89
  -5   3   2  339.49   15.57
   5   3  -1  158.93    8.40
  -5   3   1  164.73    8.88
  -5   3   1  167.28    8.85
   5   3   0 1061.23   46.08
  -5   3   0 1101.90   46.40
  -5   3   0 1118.86   46.18
  -5   3   0 1117.82   46.61
   5   3   0 1025.86   45.77
  -5   3   0 1072.24   46.38
  -5   3   0 1057.02   48.11
   5   3   1   75.56    4.95
  -5   3  -1   66.35    4.69
  -5   3  -1   62.53    5.99
  -5   3  -1   68.56    4.83
   5   3   1   69.71    5.29
   5   3   1   54.36    4.30
   5   3   1   66.71    8.45
  -5   3  -1   67.15    4.47
  -5   3  -2  838.23   42.03
   5   3   2  936.28   40.31
   5   3   2  927.53   39.86
  -5   3  -2  911.23   40.21
  -5   3  -2  943.45   39.99
  -5   3  -2  956.95   40.48
   5   3   2  962.47   46.62
   5   3   2  933.13   40.61
  -5   3  -3    0.86    1.61
  -5   3  -3    1.78    2.96
  -5   3  -3    1.15    1.79
   5   3   3    2.23    2.52
  -5   3  -3    0.79    1.65
   5   3   3    3.15    1.94
   5   3   3    0.81    3.96
   5   3   4  560.81   25.29
  -5   3  -4  496.18   28.58
  -5   3  -4  601.04   25.51
  -5   3  -4  564.53   25.62
   5   3   4  566.08   31.80
   5   3   4  583.84   26.03
   5   3   5  103.09    6.41
  -5   3  -5  117.10    6.79
  -5   3  -5  113.54    6.74
   5   3   5  101.69   11.24
   5   3   5  116.38    7.14
   5   3   6  297.72   14.36
  -5   3  -6  310.95   14.85
  -5   3  -6  306.73   14.74
   5   3   6  286.54   20.49
   5   3   6  315.50   15.08
   5   3   7  299.86   14.40
  -5   3  -7  314.78   15.08
   5   3   7  313.42   21.91
   5   3   7  301.85   14.85
   5   3   8 1067.21   44.99
  -5   3  -8 1002.81   45.59
   5   3   8 1017.04   45.20
   5   3   9  153.90    8.76
  -5   3  -9  124.54    8.95
   5   3   9  132.02    8.66
   5   3   9  148.56    9.73
   5   3  10   44.52    5.61
  -5   3 -10   36.50    3.61
  -5   3 -10   38.90    4.23
  -5   3 -10   45.45    4.96
   5   3  11    9.50    3.62
   5   3  11    8.81    3.88
  -5   3 -11    5.37    2.05
  -5   3 -11    6.57    2.93
  -5   3 -12  489.25   20.49
   5   3  12  344.03   21.12
  -5  -3 -12  444.97   28.96
  -5   3 -12  497.65   21.02
  -5  -3 -12  523.08   22.16
   5   3  12  383.11   21.37
   5   3  13    1.13    3.23
  -5   3 -13    5.00    2.14
  -5  -3 -13    4.96    4.26
  -5   3 -13    7.00    2.97
  -5  -3 -13    4.52    2.82
   5   3  13   -2.59    4.82
   5   3  14  654.30   28.81
  -5   3 -14  614.81   27.73
  -5   3 -14  629.91   28.25
  -5  -3 -14  635.61   28.66
  -5   3 -15    1.75    2.60
   5   3  15    3.09    2.36
  -5  -3 -15    5.42    2.45
   5   3  16  214.20   10.75
  -5  -3 -16  218.86   10.86
   5   3  17    2.85    1.49
  -5  -3 -17    4.13    1.82
   5   3  17    5.73    1.84
   5   3  18  139.03    6.28
   5   3  18  109.54    6.01
   5   3  19   41.61    2.51
  -5   4  16  118.37    5.99
  -5   4  16  110.41    5.92
  -5   4  15    1.01    1.29
  -5   4  15   -0.73    1.28
  -5   4  15   -1.63    1.31
  -5   4  14  224.33   11.02
  -5   4  14  242.14   11.52
  -5   4  13   91.44    5.62
  -5   4  13  100.14    6.11
  -5   4  12  134.61    7.73
  -5   4  12  136.10    8.21
  -5   4  11   94.20    6.34
   5   4 -10   14.94    2.57
  -5   4  10   10.11    2.80
  -5   4   9   90.96    6.89
   5   4  -9  100.87    6.47
  -5   4   8  386.26   19.90
   5   4  -8  416.24   19.39
  -5   4   8  405.37   19.84
  -5   4   7   22.59    3.24
  -5   4   7   23.58    3.77
   5   4  -7   28.76    4.04
  -5   4   7   19.43    3.25
   5   4  -6  388.67   18.07
  -5   4   6  395.57   18.93
  -5   4   6  414.54   19.64
   5   4  -6  415.57   19.90
  -5   4   6  383.55   19.04
   5   4  -5   60.78    4.58
  -5   4   5   74.00    5.25
  -5   4   5   75.79    5.69
   5   4  -5   63.68    6.32
  -5   4   5   73.27    5.36
  -5   4   4  229.02   12.20
  -5   4   4  249.01   12.35
   5   4  -4  230.34   13.34
   5   4  -4  235.74   11.64
   5   4  -3   21.38    2.94
  -5   4   3   24.58    3.10
  -5   4   3   27.60    3.21
   5   4  -3   25.18    4.37
  -5   4   2  290.67   14.17
  -5   4   2  293.61   14.52
   5   4  -2  289.60   14.21
  -5   4   2  289.78   14.61
  -5   4   2  293.60   14.74
   5   4  -2  304.27   15.59
  -5   4   1    1.79    1.93
  -5   4   1    2.57    2.07
  -5   4   1    1.48    2.03
  -5   4   1    1.91    1.70
   5   4   0  847.13   36.32
  -5   4   0  851.45   36.35
  -5   4   0  796.63   35.68
  -5   4   0  797.11   36.41
  -5   4  -1  125.57    7.41
  -5   4  -1  115.46    6.82
  -5   4  -1  124.91    7.57
   5   4   1  128.02    7.65
   5   4   1  115.11    7.95
   5   4   2  201.01   10.25
  -5   4  -2  178.39    9.76
  -5   4  -2  201.88   10.15
   5   4   2  171.63    9.29
   5   4   2  180.19   10.54
  -5   4  -2  166.63    9.15
   5   4   3  217.32   11.35
  -5   4  -3  212.15   11.04
   5   4   3  195.35   16.57
   5   4   3  211.77   10.59
   5   4   3  199.40   11.66
   5   4   4   96.72    6.45
  -5   4  -4   80.57    5.86
  -5   4  -4   95.86    6.12
   5   4   4   88.18    5.70
   5   4   4  107.41    7.35
   5   4   4   83.42   10.69
   5   4   5  222.77   12.03
   5   4   5  220.86   11.47
  -5   4  -5  235.88   11.12
   5   4   5  191.98   16.69
   5   4   5  212.16   10.48
   5   4   6  676.06   28.64
   5   4   6  598.23   34.85
   5   4   6  659.15   30.16
   5   4   6  623.67   26.84
   5   4   7    3.93    4.31
   5   4   7    4.24    4.77
  -5   4  -7    2.88    2.39
   5   4   7    2.43    2.19
   5   4   7    3.88    3.21
   5   4   8  486.34   31.86
   5   4   8  509.45   24.49
   5   4   8  507.61   25.72
   5   4   8  508.33   23.05
   5   4   9  135.70    8.69
  -5  -4  -9  115.25    7.58
   5   4   9  112.12    9.38
   5   4   9  118.76   14.22
   5   4   9  134.42    7.67
   5   4  10  504.40   21.26
   5   4  10  432.81   21.98
   5   4  10  441.98   22.81
   5   4  10  438.50   30.93
  -5  -4 -10  418.58   20.82
   5   4  11    6.48    3.50
   5   4  11    4.21    3.11
  -5  -4 -11    6.86    2.55
   5   4  11    4.42    2.76
   5   4  12  167.14   10.30
   5   4  12  231.74   11.42
  -5  -4 -12  213.66   10.43
   5   4  12  190.42   10.92
   5   4  13   -0.22    2.10
   5   4  13   -0.19    2.34
  -5  -4 -13    0.34    1.88
   5   4  14  166.03    8.60
   5   4  14  163.09    8.46
  -5  -4 -14  158.95    8.32
   5   4  15   13.24    1.99
  -5  -4 -15   15.59    2.01
   5   4  16    5.65    1.33
  -5  -4 -16    5.54    1.45
  -5   5  13   56.40    3.62
  -5   5  13   53.91    3.35
  -5   5  13   49.36    3.48
  -5   5  12    9.25    1.81
  -5   5  12    6.79    1.73
  -5   5  12   10.65    1.55
  -5   5  11   24.04    2.84
  -5   5  11   30.23    2.95
  -5   5  11   24.63    2.90
  -5   5  10    7.03    2.14
  -5   5  10    7.26    2.22
  -5   5  10   11.77    2.25
  -5   5   9    5.56    2.15
  -5   5   9    4.06    2.21
  -5   5   9    1.79    1.98
  -5   5   8   46.14    3.83
  -5   5   8   35.22    3.92
  -5   5   8   38.12    3.77
  -5   5   7  154.10    8.24
  -5   5   7  148.93    8.13
  -5   5   6  121.05    7.02
   5   5  -6  114.23    7.47
  -5   5   6  108.84    6.82
  -5   5   5  461.90   22.64
  -5   5   5  487.50   22.81
  -5   5   5  522.09   23.42
   5   5  -5  557.07   24.05
   5   5  -4    0.72    3.41
   5   5  -4    1.69    1.99
  -5   5   4    0.65    1.79
  -5   5   4   -0.25    2.07
   5   5  -4    2.28    3.27
  -5   5   4    0.61    1.78
  -5   5   3  969.60   42.18
  -5   5   3  982.54   42.47
   5   5  -3 1013.78   42.06
   5   5  -3  920.06   43.39
   5   5  -3  909.77   43.98
   5   5  -2  281.60   13.32
  -5   5   2  262.67   13.23
  -5   5   2  249.19   13.29
   5   5  -2  264.11   14.63
   5   5  -2  266.01   15.80
   5   5  -1  416.49   19.39
  -5   5   1  393.15   19.21
  -5   5   1  400.37   19.39
   5   5  -1  437.82   20.88
   5   5  -1  434.30   22.82
   5   5   0   89.38    5.97
  -5   5   0   71.69    5.36
  -5   5   0   80.14    5.67
   5   5   0   83.70    9.28
   5   5   1   61.08    8.70
   5   5   1   76.82    5.51
  -5   5  -1   67.99    4.96
   5   5   2   22.20    6.20
  -5   5  -2   14.07    2.37
   5   5   2   13.62    3.70
   5   5   3    3.50    3.11
  -5   5  -3    4.53    1.83
   5   5   4    8.07    2.64
   5   5   4    9.29    3.57
   5   5   5   41.49    6.62
   5   5   5   33.36    4.69
   5   5   5   41.60    4.07
   5   5   6   36.43    6.00
   5   5   6   27.95    4.54
   5   5   7  209.11   12.93
   5   5   8    3.20    3.51
   5   5   9  475.11   22.23
   5   5   9  470.32   22.79
   5   5  10   17.24    3.32
   5   5  10   12.45    2.88
   5   5  11  606.98   25.39
   5   5  11  522.91   25.14
   5   5  12   22.42    2.62
   5   5  13  177.13    8.04
   5   5  13  151.13    7.78
  -5   6   8    1.44    1.23
  -5   6   7   79.90    4.85
  -5   6   6   93.25    5.43
  -5   6   5   -0.15    1.43
  -5   6   4  143.37    7.27
   5   6  -4  127.93    7.81
   5   6  -3   -0.72    2.58
   5   6  -2  198.56   11.24
   5   6  -1   29.65    3.93
   5   6  -1   37.17    3.12
   5   6  -1   32.20    4.53
   5   6   0   39.67    4.87
   5   6   0   53.22    3.76
   5   6   0   47.59    5.15
   5   6   1  266.25   12.19
   5   6   1  250.27   13.67
   5   6   1  239.50   13.99
   5   6   2    6.26    3.89
   5   6   2    1.77    1.73
   5   6   3  255.07   12.13
   5   6   3  256.07   14.15
   5   6   4   -0.15    1.65
   5   6   4    0.62    2.91
   5   6   5  219.36    9.58
   5   6   5  159.91    9.27
   5   6   6    3.85    2.39
   5   6   6    3.75    1.68
   5   6   6    1.57    1.62
   5   6   7   19.13    2.68
   5   6   7   18.47    2.39
   5   6   8   69.10    4.54
   5   6   8   68.68    4.23
  -6   0  20  208.90    9.68
   6   0 -19   -0.16    1.69
   6   0 -18    2.61    2.04
   6   0 -18    3.61    1.76
   6   0 -17   -1.06    2.25
   6   0 -17   -2.43    2.07
   6   0 -16   68.08    5.27
   6   0 -16   69.70    5.08
  -6   0  15   -5.05    6.28
   6   0 -15    0.26    2.59
   6   0 -15   -2.09    5.94
   6   0 -15    1.17    2.60
   6   0 -14   73.24    5.86
   6   0 -14   53.50    5.14
   6   0 -14   54.43    9.86
  -6   0  14   48.40    9.17
   6   0 -13    0.31    3.24
   6   0 -13    4.48    2.98
   6   0 -13    3.77    6.61
   6   0 -13   -0.28    2.91
  -6   0  13   -4.84    7.15
   6   0 -12  127.85    8.57
   6   0 -12  112.78    8.00
   6   0 -12  114.39   14.61
   6   0 -12  119.66    8.10
  -6   0  12  102.54   13.23
   6   0 -11    1.62    3.39
   6   0 -11   -1.63    3.05
   6   0 -11    1.10    2.84
   6   0 -11   -1.27    6.34
  -6   0  11   -1.16    5.58
   6   0 -10  734.65   32.62
   6   0 -10  763.81   32.61
  -6   0  10  809.47   41.43
  -6   0   9    0.50    2.24
  -6   0   9    4.49    5.03
   6   0  -9    2.88    2.33
   6   0  -9    0.52    2.69
   6   0  -9    0.64    2.40
   6   0  -8 3028.26  121.22
   6   0  -8 2851.09  120.58
  -6   0   8 3013.32  127.65
  -6   0   8 2767.10  121.12
   6   0  -7    0.20    2.17
   6   0  -7    0.16    1.96
  -6   0   7    2.44    2.09
   6   0  -6 1379.18   61.32
  -6   0   6 1599.47   62.19
  -6   0   6 1405.64   66.56
   6   0  -6 1446.01   61.80
  -6   0   5   -1.22    4.08
   6   0  -5    0.17    2.03
  -6   0   5   -0.12    1.28
  -6   0   5   -0.18    1.81
  -6   0   4  204.30    9.65
  -6   0   4  178.74    9.08
  -6   0   4  216.10   13.85
  -6   0   3   -0.55    3.50
  -6   0   3    0.41    1.76
  -6   0   2  996.68   43.04
  -6   0   2 1045.00   47.48
  -6   0   2 1022.62   43.14
  -6   0   1    1.23    1.71
  -6   0   1   -0.48    2.91
  -6   0   1   -0.70    1.34
  -6   0   1    0.12    1.59
   6   0   0  761.23   36.46
  -6   0   0  751.67   32.81
  -6   0   0  764.21   32.83
  -6   0   0  789.64   33.09
  -6   0  -1    1.86    1.64
   6   0   1    1.86    3.51
  -6   0  -1   -0.38    1.44
  -6   0  -1    1.34    1.70
   6   0   2 1531.57   69.21
  -6   0  -2 1542.50   65.20
  -6   0  -2 1582.23   65.34
  -6   0  -2 1542.74   65.46
   6   0   3   -0.53    3.54
  -6   0  -3    0.36    2.31
  -6   0  -3    1.90    1.72
  -6   0  -3    0.13    1.57
   6   0   3   -0.49    2.98
  -6   0  -4 1423.55   63.73
   6   0   4 1386.74   63.26
  -6   0  -4 1310.54   61.86
  -6   0  -4 1397.89   58.52
   6   0   4 1402.05   62.49
  -6   0  -5    1.90    4.02
  -6   0  -5    0.55    3.15
   6   0   5    0.60    3.62
  -6   0  -5   -0.60    1.81
   6   0   5    0.53    3.23
  -6   0  -6 2630.52  118.87
  -6   0  -6 2789.80  120.02
  -6   0  -6 2773.86  114.22
   6   0   6 2679.54  118.53
  -6   0  -7    1.95    3.80
  -6   0  -7    1.47    4.40
  -6   0  -7    0.86    2.07
   6   0   7   -0.63    3.42
   6   0   8  418.09   19.20
  -6   0  -8  406.92   23.92
  -6   0  -8  425.86   19.47
  -6   0  -8  420.63   25.45
   6   0   8  414.41   24.35
  -6   0  -9    0.97    5.89
  -6   0  -9    1.47    3.80
  -6   0  -9   -0.67    2.58
   6   0   9   -0.81    4.58
  -6   0 -10   37.25    4.63
  -6   0 -10   25.32    4.03
   6   0  10   28.63    6.31
  -6   0 -10   32.42    8.62
  -6   0 -11   -2.17    4.28
  -6   0 -11    5.42    7.68
  -6   0 -11    1.50    3.28
   6   0  11   -2.84    4.45
  -6   0 -12  266.93   15.36
  -6   0 -12  276.80   24.05
  -6   0 -12  304.18   15.26
   6   0  12  285.80   20.66
  -6   0 -13    3.37    4.03
  -6   0 -13   -1.38    7.71
  -6   0 -14  304.52   15.75
  -6   0 -14  299.18   14.82
   6   0  15    1.92    2.04
  -6   0 -15   -0.98    3.20
  -6   0 -15    2.48    1.99
   6   0  16  340.68   15.36
  -6   0 -16  361.53   16.11
   6   0  17   -1.11    1.74
  -6   0 -17   -0.95    2.45
   6   0  18  373.15   16.72
  -6   0 -18  381.62   17.37
   6   0  19   -1.04    1.15
  -6   0 -20  381.30   16.85
  -6  -1  19   50.22    3.17
  -6   1  19   45.68    3.07
   6  -1 -18   28.39    3.00
   6   1 -18   30.45    3.18
   6  -1 -17    5.20    2.11
   6   1 -17    4.46    2.29
   6   1 -17    5.00    2.46
   6  -1 -16  247.21   12.37
   6   1 -16  251.17   13.11
   6   1 -16  242.41   12.73
  -6  -1  15   23.69    6.42
  -6   1  15   20.51    6.07
   6   1 -15   23.29    4.03
   6  -1 -15   27.93    3.44
   6   1 -15   17.41    3.63
   6   1 -15   20.96    5.45
   6  -1 -14  336.61   24.31
   6   1 -14  373.00   25.89
   6  -1 -14  362.61   17.63
   6   1 -14  395.49   18.86
   6   1 -14  377.02   18.38
  -6   1  14  340.58   16.71
  -6  -1  14  381.32   26.27
  -6   1  14  339.87   24.58
   6  -1 -13  155.93    9.21
   6  -1 -13  140.32   15.19
   6   1 -13  157.71   10.00
   6   1 -13  131.83   15.56
  -6   1  13  148.92    8.46
   6   1 -13  163.18   10.55
  -6  -1  13  155.23   16.62
  -6   1  13  130.95   14.73
  -6  -1  12   46.40   10.76
  -6   1  12   45.06    9.36
   6  -1 -12   59.06    5.36
   6   1 -12   60.82    6.62
   6   1 -12   67.53    5.71
   6  -1 -12   58.77    5.36
   6   1 -12   46.58    5.98
   6  -1 -12   62.20   10.67
   6   1 -12   47.07   10.62
  -6   1  12   65.87    5.00
   6  -1 -11  599.08   30.30
   6  -1 -11  683.07   39.52
   6   1 -11  639.86   31.19
  -6   1  11  748.08   39.12
   6   1 -11  598.95   31.41
   6   1 -11  676.31   30.63
   6  -1 -11  641.12   30.24
  -6   1  11  809.41   31.07
  -6  -1  11  727.98   40.63
   6   1 -11  768.74   41.86
   6  -1 -10  142.65    8.86
   6   1 -10  152.84   10.16
   6  -1 -10  162.53   15.56
   6   1 -10  170.81   16.74
   6   1 -10  154.67    9.83
  -6   1  10  146.94   14.16
   6   1 -10  155.03    8.95
   6  -1 -10  150.85    8.77
  -6  -1  10  168.79   15.92
  -6   1  10  138.42    9.06
   6  -1  -9  803.84   35.25
   6   1  -9  820.27   36.38
   6   1  -9  853.64   36.12
  -6   1   9  676.29   35.47
  -6  -1   9  870.41   43.40
  -6   1   9  836.03   41.98
   6  -1  -9  790.51   34.98
   6   1  -9  825.35   35.23
   6  -1  -8  223.90   11.17
   6   1  -8  231.10   12.27
   6   1  -8  231.89   11.98
   6   1  -8  221.22   11.15
   6  -1  -8  223.17   11.01
  -6   1   8  227.97   16.22
  -6   1   8  178.81   11.10
  -6  -1   8  246.75   17.02
  -6   1   8  224.23   11.88
   6  -1  -7  342.84   16.41
   6   1  -7  361.27   17.48
   6   1  -7  374.85   17.32
  -6   1   7  308.41   16.83
  -6  -1   7  355.43   21.71
  -6   1   7  399.52   22.00
  -6   1   7  408.18   17.64
  -6  -1   6   44.79    6.84
  -6   1   6   41.38    6.31
   6  -1  -6   37.36    3.36
   6   1  -6   42.27    4.13
   6   1  -6   46.59    4.34
  -6   1   6   51.10    4.22
  -6   1   6   47.31    4.07
   6  -1  -5   80.99    4.96
  -6  -1   5   74.60    5.09
  -6   1   5   81.59    5.07
  -6   1   5   82.96    5.38
  -6   1   5   87.68    5.52
  -6  -1   5   77.22    8.33
  -6   1   5   83.15    8.48
  -6  -1   4  298.84   13.93
  -6   1   4  288.21   13.84
  -6   1   4  287.72   13.83
  -6   1   4  296.21   14.17
  -6   1   4  320.19   14.35
  -6  -1   4  304.11   18.08
  -6   1   4  306.89   18.08
  -6  -1   3    9.46    4.11
  -6   1   3    4.87    3.46
  -6   1   3    6.23    1.76
  -6  -1   3    7.96    1.95
  -6   1   3    8.26    1.94
  -6   1   3    6.06    1.83
  -6   1   3    8.64    2.02
  -6  -1   3    8.28    1.70
  -6  -1   2 1098.42   46.56
  -6   1   2 1092.16   46.49
  -6   1   2 1092.17   46.68
  -6   1   2 1077.81   50.66
  -6   1   2 1090.92   46.95
  -6   1   2 1166.51   47.03
  -6  -1   2 1131.06   51.02
  -6  -1   2 1061.95   46.33
  -6  -1   1   38.23    3.06
  -6   1   1   41.23    3.05
  -6   1   1   46.40    3.31
  -6   1   1   39.62    3.32
  -6   1   1   39.34    3.28
  -6  -1   1   31.48    2.83
   6  -1   0 1246.61   58.56
  -6  -1   0 1298.80   54.92
  -6   1   0 1280.04   54.89
  -6   1   0 1358.95   55.29
  -6   1   0 1300.23   55.26
   6   1   0 1330.07   58.87
   6   1   1  281.11   16.14
   6  -1   1  283.31   16.17
  -6   1  -1  269.92   12.95
  -6  -1  -1  270.93   12.67
  -6   1  -1  274.85   12.69
   6   1   1  280.68   17.16
  -6   1  -1  274.49   12.95
   6   1   2   51.14    6.20
   6  -1   2   50.89    6.17
  -6   1  -2   48.63    3.68
  -6  -1  -2   45.81    3.43
  -6   1  -2   49.23    3.55
   6   1   2   59.41    6.92
  -6   1  -2   53.66    3.78
   6   1   3 1341.45   60.19
   6  -1   3 1328.52   60.12
  -6   1  -3 1322.25   56.04
  -6  -1  -3 1290.82   55.64
  -6   1  -3 1340.08   55.75
   6   1   3 1340.69   61.13
  -6   1  -4  274.56   17.18
  -6  -1  -4  292.18   17.37
   6  -1   4  260.15   16.76
  -6   1  -4  272.78   13.35
  -6  -1  -4  278.68   13.01
  -6   1  -4  287.99   13.12
   6   1   4  287.85   17.16
   6   1   4  264.87   17.34
  -6   1  -5  740.37   37.06
  -6  -1  -5  723.76   36.77
   6   1   5  755.87   37.06
   6  -1   5  721.66   36.62
  -6  -1  -5  695.09   36.77
  -6   1  -5  742.79   32.57
  -6  -1  -5  754.98   32.15
  -6   1  -5  744.85   32.17
   6   1   5  747.07   37.49
  -6   1  -6  185.23   13.59
  -6  -1  -6  202.75   13.94
   6   1   6  188.19   13.31
   6  -1   6  165.73   12.78
   6   1   6  175.88    9.25
  -6  -1  -6  167.87   13.22
  -6  -1  -6  183.07    9.08
   6   1   6  197.37   14.21
  -6  -1  -7  304.68   19.04
   6   1   7  265.56   13.60
  -6  -1  -7  264.56   18.02
  -6   1  -7  297.53   14.02
  -6  -1  -7  291.15   13.57
   6   1   7  277.06   18.95
  -6   1  -7  319.94   19.31
  -6   1  -8   56.83    9.04
  -6  -1  -8   74.41    9.58
  -6  -1  -8   47.45    7.46
  -6   1  -8   74.91    5.34
  -6  -1  -8   67.72    4.94
   6   1   8   71.15    9.51
  -6   1  -9  212.82   17.80
  -6  -1  -9  234.87   18.34
  -6  -1  -9  210.42   16.11
  -6   1  -9  231.29   12.03
  -6  -1  -9  217.78   11.61
   6   1   9  204.67   17.62
  -6   1 -10  535.11   25.78
  -6  -1 -10  566.89   25.97
  -6   1 -10  541.13   34.27
  -6  -1 -10  588.07   34.99
  -6  -1 -10  535.33   31.10
  -6   1 -10  585.07   26.19
  -6  -1 -10  523.81   25.42
   6   1  10  598.94   34.56
  -6  -1 -11    0.31    4.00
  -6   1 -11    2.69    6.71
  -6  -1 -11   -1.35    7.35
  -6  -1 -11   -1.79    4.03
   6   1  11   -2.42    5.06
  -6   1 -11    1.97    3.73
  -6  -1 -11    5.91    2.71
  -6   1 -11    2.44    3.85
  -6   1 -12  258.19   14.51
  -6  -1 -12  286.30   14.73
  -6   1 -12  268.43   23.04
  -6  -1 -12  251.66   22.76
  -6  -1 -12  289.56   20.02
  -6   1 -12  271.70   15.03
   6   1  12  240.70   20.90
  -6  -1 -13  165.92   10.15
  -6  -1 -13  166.62   17.35
  -6   1 -13  133.56   16.14
  -6  -1 -13  144.41   14.25
  -6   1 -13  189.86   10.84
  -6   1 -13  170.10   10.21
   6   1  13  167.08   16.15
  -6  -1 -14  330.15   22.41
   6   1  14  300.97   21.99
  -6  -1 -15  468.93   21.09
  -6   1 -15  450.78   21.50
  -6  -1 -15  447.91   21.42
   6   1  16   15.04    2.84
  -6   1 -16   15.11    3.23
  -6  -1 -16   13.87    2.82
  -6  -1 -16   15.79    2.80
   6   1  17  238.56   11.54
  -6   1 -17  258.07   12.16
  -6  -1 -17  228.94   11.42
  -6  -1 -17  229.78   11.60
   6   1  18   38.12    3.11
  -6   1 -18   36.69    3.69
  -6  -1 -18   39.44    3.18
   6   1  19   80.66    4.42
  -6   1 -19   76.38    4.67
   6   1  20   18.23    1.57
  -6  -2  18   37.52    2.85
  -6  -2  17  470.72   20.40
  -6   2  17  448.43   20.22
   6  -2 -16   15.88    2.36
  -6   2  16   18.83    2.22
   6  -2 -15  374.85   17.41
   6   2 -15  396.21   18.89
  -6   2  15  367.22   17.39
   6  -2 -14  124.48    7.36
   6   2 -14  140.21    9.11
  -6  -2  14  120.11   13.01
  -6   2  14  109.05   11.94
  -6   2  14  119.74    7.18
   6  -2 -13  251.38   18.49
   6   2 -13  239.44   18.74
   6  -2 -13  241.79   12.56
   6   2 -13  263.00   14.95
  -6   2  13  266.21   12.96
  -6  -2  13  230.05   20.18
  -6   2  13  203.34   17.81
  -6  -2  12   -1.26    5.92
  -6   2  12    4.90    4.51
   6  -2 -12    4.15    2.58
   6  -2 -12    3.84    4.70
   6   2 -12    1.05    5.59
   6   2 -12    0.44    4.62
  -6   2  12    4.48    1.77
  -6   2  12    5.82    2.50
  -6  -2  11    8.63    6.83
  -6   2  11   22.62    6.79
   6  -2 -11   12.53    6.44
   6   2 -11   10.22    6.10
   6   2 -11   17.17    5.17
   6   2 -11   13.44    3.33
   6  -2 -11   13.68    3.15
  -6   2  11   16.87    2.70
  -6   2  11   18.23    3.38
  -6  -2  10    1.13    6.61
  -6   2  10   -1.74    5.58
   6   2 -10    1.99    4.10
   6  -2 -10   -2.22    5.83
   6   2 -10    1.21    6.64
   6   2 -10    1.52    2.87
  -6   2  10    2.25    2.06
   6  -2 -10    1.20    2.61
  -6   2  10    2.55    2.72
  -6   2   9   40.14    6.60
   6   2  -9   35.09    3.84
   6   2  -9   27.25    5.17
   6  -2  -9   27.28    7.35
   6   2  -9   36.72    8.35
   6  -2  -9   29.29    3.54
  -6   2   9   25.54    3.55
  -6  -2   9   23.91    7.19
  -6   2   9   22.63    3.83
  -6  -2   8   31.98    6.76
  -6   2   8   36.30    6.32
   6   2  -8   35.14    4.90
   6   2  -8   32.88    3.69
   6  -2  -8   30.80    3.60
  -6   2   8   26.91    3.70
  -6   2   8   34.57    4.13
   6   2  -7  434.47   19.53
   6  -2  -7  429.47   19.41
  -6  -2   7  428.90   19.66
  -6   2   7  409.81   19.25
  -6   2   7  408.12   23.80
  -6   2   7  424.78   20.36
  -6  -2   7  439.24   25.18
  -6   2   7  427.07   20.30
  -6  -2   6   54.65    7.59
  -6   2   6   60.17    7.23
  -6  -2   6   54.57    4.33
  -6   2   6   60.94    4.22
  -6   2   6   69.91    5.10
  -6   2   6   72.07    5.13
   6   2  -5 1062.77   45.25
  -6  -2   5 1034.48   44.90
  -6   2   5 1054.11   44.81
  -6   2   5 1078.49   45.72
  -6  -2   5 1061.38   49.91
  -6   2   5 1082.99   49.63
  -6   2   5 1018.62   45.55
  -6  -2   4   76.59    4.78
  -6   2   4   73.41    4.73
  -6   2   4   76.40    5.12
   6   2  -4   77.58    5.15
  -6   2   4   83.15    5.38
  -6  -2   4   86.06    8.35
  -6   2   4   93.37    8.48
  -6   2   4   74.34    5.21
  -6  -2   3 1613.14   67.61
  -6   2   3 1612.72   67.57
  -6   2   3 1604.75   68.14
  -6   2   3 1669.46   72.13
   6   2  -3 1598.97   67.85
  -6   2   3 1575.45   68.23
  -6   2   3 1618.71   68.32
  -6  -2   3 1644.38   72.32
  -6   2   2   44.56    3.82
  -6  -2   2   46.68    3.42
  -6   2   2   42.99    3.29
  -6   2   2   46.29    3.75
   6   2  -1 1137.62   51.66
  -6   2   1 1306.06   52.72
  -6  -2   1 1261.10   52.01
  -6   2   1 1257.20   51.96
  -6   2   1 1249.53   52.65
  -6   2   0   49.20    3.94
  -6   2   0   59.41    4.21
  -6  -2   0   60.83    3.74
  -6   2   0   52.78    3.55
  -6   2   0   49.03    4.12
  -6   2  -1  499.78   22.47
  -6  -2  -1  503.52   21.87
  -6   2  -1  482.42   21.80
  -6   2  -1  498.74   22.63
  -6   2  -1  505.67   22.37
   6   2   2  154.82   11.46
   6  -2   2  149.12   11.06
  -6   2  -2  168.13   11.92
  -6  -2  -2  165.93   11.87
  -6   2  -2  174.68    8.78
  -6  -2  -2  160.50    8.15
  -6   2  -2  168.75    8.19
   6   2   2  150.22    8.36
  -6   2  -2  169.40    8.66
  -6   2  -3   51.00    6.77
  -6  -2  -3   49.71    6.71
   6   2   3   55.96    6.54
   6  -2   3   46.59    6.03
  -6  -2  -3   52.97    3.70
  -6   2  -3   48.68    3.64
   6   2   3   48.30    3.90
   6   2   3   46.68    7.38
  -6   2  -3   54.17    4.11
   6   2   4  117.02    6.69
  -6   2  -4  109.17    9.75
  -6  -2  -4  119.85   10.04
   6  -2   4  103.46    9.23
  -6   2  -4  118.03    6.86
  -6  -2  -4  123.86    6.41
  -6   2  -4  112.39    6.30
   6   2   4  103.72   10.82
   6   2   4   99.24    9.35
   6   2   5   63.82    4.59
  -6   2  -5   56.55    7.37
   6  -2   5   58.99    7.10
   6   2   5   55.17    7.23
   6   2   5   61.34    4.53
   6   2   5   55.05    8.08
  -6  -2  -5   71.95    8.04
  -6   2  -6   17.61    5.28
  -6  -2  -6   10.66    4.83
   6   2   6   17.36    4.79
   6  -2   6   17.34    4.73
  -6   2  -6   21.82    2.92
   6   2   6   15.72    5.54
   6   2   6   16.44    2.75
  -6   2  -7  937.87   45.82
  -6  -2  -7  929.62   45.94
   6   2   7  939.97   44.71
   6  -2   7  900.17   44.28
  -6   2  -7  893.28   39.39
   6   2   7  912.44   47.04
   6   2   7  879.34   38.96
  -6  -2  -8   12.16    3.41
  -6   2  -8    8.83    3.22
  -6   2  -8   13.51    6.50
  -6  -2  -8   14.74    6.62
   6   2   8    7.05    4.66
   6  -2   8   13.82    5.18
  -6   2  -8   15.46    3.35
   6   2   8   10.73    6.11
  -6   2  -9  721.77   32.80
  -6  -2  -9  688.08   32.76
  -6  -2  -9  710.45   41.39
  -6   2  -9  698.45   40.96
   6   2   9  776.48   39.56
   6  -2   9  800.04   39.58
  -6  -2  -9  650.95   39.48
  -6   2  -9  753.43   33.12
   6   2   9  832.31   43.24
  -6   2 -10  126.53    8.65
  -6  -2 -10  150.53    9.01
  -6   2 -10  116.99   15.00
  -6  -2 -10  106.51   14.50
   6   2  10  131.14   13.65
   6  -2  10  126.64   13.16
  -6  -2 -10  149.38   14.31
   6   2  10  128.08   15.23
  -6  -2 -11  428.12   20.57
  -6   2 -11  379.45   27.69
  -6  -2 -11  405.82   28.48
   6   2  11  386.49   26.97
   6  -2  11  370.45   26.44
   6   2  11  412.54   20.09
  -6  -2 -11  425.03   26.75
  -6   2 -11  422.10   19.67
   6   2  12    3.45    3.33
  -6   2 -12   11.07    3.41
  -6  -2 -12    9.73    3.38
  -6   2 -12   11.95    6.43
  -6  -2 -12    5.08    4.78
   6   2  12   11.47    6.33
   6  -2  12    1.08    5.00
   6   2  12    9.46    6.49
   6  -2  13  353.03   24.39
   6   2  13  349.24   17.50
  -6   2 -13  382.43   17.30
  -6  -2 -13  371.13   24.09
   6   2  13  311.55   24.87
   6   2  14   43.67    4.68
  -6   2 -14   38.65    4.37
  -6  -2 -14   45.44    7.53
   6   2  14   43.68    8.42
   6   2  15   75.43    5.51
  -6   2 -15   65.71    5.27
  -6  -2 -15   75.57    5.56
   6   2  16   68.72    4.90
  -6   2 -16   72.11    4.76
  -6   2 -16   60.62    4.82
  -6  -2 -16   61.16    4.74
  -6   2 -17   13.30    2.23
  -6   2 -17   16.82    2.92
  -6  -2 -17   13.07    2.26
   6   2  17   14.93    2.47
  -6  -2 -18    4.42    1.58
  -6   2 -18    1.81    1.51
   6   2  18    2.02    1.65
   6   2  19   84.67    4.53
   6   2  20    0.64    0.73
  -6   3  17   25.71    2.18
  -6   3  17   23.15    2.10
  -6   3  16  129.79    6.67
  -6   3  16  121.61    6.63
  -6   3  15    8.27    1.84
  -6   3  14  208.76   10.47
  -6   3  14  236.78   11.35
  -6   3  13   60.30    4.36
  -6   3  13   71.41    5.21
   6  -3 -12  175.75   14.95
  -6   3  12  198.18   10.26
  -6   3  12  197.56   10.98
  -6   3  11   53.35    5.19
  -6   3  11   54.94    4.70
  -6   3  10    6.37    2.52
  -6   3  10    4.92    2.73
  -6   3   9  244.34   13.31
  -6   3   9  247.32   13.63
  -6   3   8  282.49   14.00
  -6   3   8  225.94   13.32
  -6   3   7  231.35   12.93
  -6   3   7  249.57   13.07
  -6   3   6  504.29   23.97
  -6   3   6  538.45   24.56
  -6   3   5  217.76   11.35
  -6   3   5  213.19   11.63
  -6   3   4  842.36   36.53
   6   3  -4  801.45   35.79
  -6   3   4  843.07   36.41
  -6   3   4  813.54   36.50
   6   3  -3    0.70    1.99
  -6   3   3    1.41    2.05
  -6   3   3    0.46    1.98
   6   3  -2  547.47   24.75
   6   3  -2  571.45   25.14
  -6   3   2  563.73   25.76
  -6   3   2  581.02   25.85
  -6   3   1   68.46    7.27
   6   3  -1   64.95    4.60
   6   3  -1   69.68    4.90
  -6   3   1   82.35    5.49
  -6   3   1   74.20    5.13
  -6   3   0  550.39   28.31
   6   3   0  559.21   25.34
   6   3   0  564.37   25.36
  -6   3   0  598.12   25.75
  -6   3  -1  171.92   12.41
   6   3   1  208.00   10.32
  -6   3  -1  202.61   10.51
   6   3   1  191.71   10.05
  -6   3  -1  197.91   10.24
  -6   3  -2  147.43   11.22
   6   3   2  191.81    9.21
  -6   3  -2  165.57    9.03
  -6   3  -2  149.61    9.02
   6   3   2  128.95   13.25
   6   3   2  167.94    9.37
   6   3   2  162.89    8.72
  -6   3  -2  151.80    8.68
  -6   3  -3  115.89   10.30
  -6   3  -3  143.85    8.21
   6   3   3  134.30   13.23
   6   3   3  149.63    8.66
   6   3   3  137.31    7.86
  -6   3  -3  150.04    8.05
  -6   3  -4   43.69    6.58
  -6   3  -4   48.02    4.23
  -6   3  -4   58.39    4.54
   6   3   4   60.89    5.03
   6   3   4   44.21    8.21
   6   3   4   52.35    4.27
  -6   3  -5  181.53    9.79
  -6   3  -5  177.98    9.88
   6   3   5  181.99   15.78
   6   3   5  205.55   10.39
   6   3   5  163.17    9.49
   6   3   6  357.19   17.21
  -6   3  -6  376.40   17.68
  -6   3  -6  358.54   17.59
   6   3   6  372.13   24.58
   6   3   6  359.71   17.71
  -6   3  -7   20.74    3.68
   6   3   7   25.51    3.48
   6   3   7   17.99    3.39
  -6   3  -8  824.78   35.74
  -6   3  -8  724.73   34.29
   6   3   8  752.13   35.01
   6   3   8  884.73   35.31
  -6   3  -9   48.27    4.36
   6   3   9   63.16    5.36
  -6   3  -9   62.55    5.84
   6   3   9   57.30    5.23
   6   3  10  879.28   36.82
  -6   3 -10  798.92   35.67
   6   3  10  782.64   37.12
  -6   3 -10  782.62   36.80
   6   3  11   11.82    8.18
   6   3  11   16.91    3.86
  -6  -3 -11   13.21    5.92
  -6   3 -11   17.86    3.28
  -6   3 -11   18.65    3.78
   6   3  11   18.32    4.15
   6   3  12  162.59   10.72
  -6  -3 -12  196.57   16.52
  -6   3 -12  214.67   10.31
   6   3  12  159.91   17.71
   6   3  13   54.01    5.32
  -6   3 -13   64.83    5.04
   6   3  14   75.69    5.68
  -6   3 -14   80.71    5.33
  -6  -3 -14   68.51    5.46
   6   3  15  173.41    8.71
  -6   3 -15  150.57    8.42
  -6  -3 -15  153.59    8.50
   6   3  16   66.41    4.33
  -6  -3 -16   62.79    4.31
   6   3  17   31.15    2.54
  -6   4  15   38.37    2.86
  -6   4  15   39.04    2.87
  -6   4  14   77.54    4.64
  -6   4  14   65.16    4.03
  -6   4  14   72.01    4.52
  -6   4  13   19.04    2.66
  -6   4  13   16.96    2.01
  -6   4  13   17.38    2.39
  -6   4  12  357.86   17.76
  -6   4  12  374.59   17.32
  -6   4  12  389.50   17.92
  -6   4  11   -0.77    2.10
  -6   4  11    1.76    1.95
  -6   4  11    2.64    2.41
  -6   4  10  302.14   15.26
  -6   4  10  304.19   15.16
   6   4 -10  296.85   14.45
  -6   4   9   -0.58    2.55
   6   4  -9   -0.67    2.23
  -6   4   8  226.83   12.97
   6   4  -8  255.25   12.78
  -6   4   8  235.42   13.01
  -6   4   7    4.04    2.81
   6   4  -7   -0.88    2.77
  -6   4   7    2.02    2.30
  -6   4   6  114.20    7.72
   6   4  -6  111.97    8.17
  -6   4   6  113.81    7.50
  -6   4   5   60.90    4.93
  -6   4   5   63.88    5.39
   6   4  -5   53.40    6.02
  -6   4   5   64.91    5.17
   6   4  -4  111.49    6.80
  -6   4   4  131.41    7.91
  -6   4   4  142.37    8.39
   6   4  -4  146.42    9.41
  -6   4   4  127.19    7.82
  -6   4   4  125.25    7.50
   6   4  -3  324.19   15.82
  -6   4   3  348.45   16.77
   6   4  -3  370.28   18.07
  -6   4   3  330.20   16.63
  -6   4   3  348.76   16.43
   6   4  -2   27.05    3.24
  -6   4   2   29.43    3.53
  -6   4   2   27.88    3.33
   6   4  -1  189.13   10.06
  -6   4   1  192.52   10.70
  -6   4   1  194.73   10.88
  -6   4   1  208.08   10.45
   6   4   0  604.57   27.48
  -6   4   0  613.20   27.81
   6   4   0  608.20   27.06
  -6   4   0  604.20   27.90
   6   4   0  595.97   28.34
  -6   4   0  623.59   27.38
  -6   4  -1   10.68    2.18
   6   4   1   11.13    2.78
   6   4   1    6.01    2.34
  -6   4  -1   10.57    2.64
  -6   4  -1    7.22    2.48
   6   4   1    9.90    3.34
   6   4   2  660.22   28.58
  -6   4  -2  593.31   27.58
  -6   4  -2  610.61   28.41
   6   4   2  640.82   27.93
   6   4   2  661.76   29.28
   6   4   3    1.68    2.38
  -6   4  -3    2.79    1.99
   6   4   3    2.03    2.00
  -6   4  -3   -1.42    2.01
   6   4   3    1.75    2.79
   6   4   4  370.39   17.25
  -6   4  -4  324.09   16.58
  -6   4  -4  345.97   16.97
   6   4   4  330.06   23.63
   6   4   4  354.61   16.51
   6   4   4  379.57   17.94
   6   4   5    4.04    4.11
   6   4   5    1.00    2.39
  -6   4  -5    0.46    2.43
  -6   4  -5    2.80    2.06
   6   4   5    1.85    1.97
   6   4   5    4.18    3.10
   6   4   6  408.16   18.01
   6   4   6  373.87   25.33
   6   4   6  363.68   16.91
   6   4   6  403.38   18.44
   6   4   7    4.57    3.83
   6   4   7    3.33    2.73
  -6   4  -7    1.96    2.71
   6   4   7    0.97    2.14
   6   4   7    6.61    5.17
   6   4   7    3.67    3.12
   6   4   8  219.18   12.00
  -6   4  -8  185.85   11.05
   6   4   8  192.77   18.07
   6   4   8  225.41   13.33
   6   4   8  219.44   12.04
   6   4   8  225.14   11.06
   6   4   9  156.49    8.57
   6   4   9  134.02   10.19
  -6  -4 -10   76.24    5.47
   6   4  10   82.68    5.77
   6   4  10   74.25    6.88
   6   4  11   92.10    6.72
  -6  -4 -11   93.39    5.86
   6   4  11   89.04    6.09
   6   4  11   79.82    6.68
   6   4  12   17.49    3.05
   6   4  12   20.12    3.27
   6   4  12   16.33    3.05
  -6  -4 -12   24.04    2.81
   6   4  13   93.46    5.70
  -6  -4 -13   87.22    5.17
   6   4  14  318.85   14.20
  -6  -4 -14  291.06   13.85
   6   4  15   33.39    2.68
  -6  -4 -15   35.40    2.68
  -6   5  12   -0.51    1.19
  -6   5  12    0.90    1.25
  -6   5  12   -1.26    1.20
  -6   5  11  290.53   13.77
  -6   5  11  304.41   13.64
  -6   5  11  284.41   13.74
  -6   5  10   26.23    2.91
  -6   5  10   31.65    2.94
  -6   5  10   24.93    2.89
  -6   5   9  371.40   17.03
  -6   5   9  375.53   17.17
  -6   5   9  338.73   16.94
  -6   5   8    0.40    1.72
  -6   5   8    0.23    1.89
  -6   5   8    0.63    1.76
  -6   5   7  367.44   16.94
  -6   5   7  343.38   16.84
  -6   5   7  357.18   17.32
   6   5  -7  361.26   16.92
  -6   5   6  125.78    7.40
   6   5  -6  133.66    8.06
  -6   5   6  131.57    7.48
  -6   5   5   68.77    4.95
   6   5  -5   68.68    5.87
  -6   5   4   81.36    5.39
   6   5  -4   76.67    6.74
  -6   5   4   82.08    5.69
   6   5  -4   66.27    6.29
   6   5  -3   20.68    4.74
  -6   5   3   16.89    2.65
  -6   5   3   19.26    2.95
   6   5  -3   12.48    3.76
   6   5  -2   23.20    5.20
   6   5  -2   22.59    2.93
  -6   5   2   24.70    3.11
  -6   5   2   28.91    3.26
   6   5  -2   35.21    4.78
   6   5  -1   89.37    5.78
   6   5  -1   94.62    8.94
  -6   5   1   87.60    5.85
  -6   5   1   85.55    5.85
   6   5   0   -0.54    5.03
   6   5   0    5.00    2.28
  -6   5   0    7.37    2.15
   6   5   1  309.86   14.77
  -6   5  -1  302.86   14.73
   6   5   1  311.94   15.86
   6   5   1  270.90   18.04
   6   5   2   18.22    5.87
   6   5   2   12.42    2.75
  -6   5  -2   11.82    2.34
   6   5   2   12.19    3.66
  -6   5  -3  501.68   22.93
   6   5   3  512.50   24.11
   6   5   4    3.54    3.03
   6   5   5  534.06   24.05
   6   5   5  540.55   24.97
   6   5   5  491.91   26.14
   6   5   6  116.93    6.97
   6   5   6  100.18    7.45
   6   5   6  108.14    8.73
   6   5   7  398.24   17.91
   6   5   7  334.69   18.84
   6   5   8  139.39    7.84
   6   5   8  113.06    8.45
   6   5   9   14.14    3.33
   6   5  10   37.51    3.77
   6   5  11   55.47    3.85
   6   5  11   39.74    3.46
   6   5  12    0.50    1.30
   6   6  -4    1.49    1.97
   6   6  -3  175.66    9.60
   6   6  -2    6.54    2.80
   6   6  -1  211.33   11.49
   6   6   0    6.54    2.88
   6   6   0    7.89    2.97
   6   6   1  135.05    8.69
   6   6   2   18.79    3.80
   6   6   2   29.40    2.46
   6   6   3   -1.13    2.96
   6   6   3    2.30    1.36
   6   6   4  127.54    6.70
   6   6   4  140.14    8.32
   6   6   5   49.18    3.40
   6   6   6  109.50    6.51
   6   6   6  109.92    5.87
  -7   0  19    3.44    1.18
  -7   0  18   99.44    5.55
   7   0 -16  289.89   14.45
   7   0 -15    4.30    2.93
   7   0 -15   -0.22    2.36
   7   0 -14  507.20   31.32
   7   0 -14  430.94   21.93
   7   0 -14  471.25   21.62
  -7   0  14  430.31   29.17
  -7   0  13    3.72    5.94
   7   0 -13   -0.34    3.50
   7   0 -13   -1.35    6.47
   7   0 -13   -2.03    3.15
   7   0 -13    2.35    3.37
   7   0 -12  291.85   15.56
   7   0 -12  301.43   24.96
   7   0 -12  257.76   14.68
   7   0 -12  292.18   15.08
  -7   0  12  258.12   22.19
  -7   0  11   -1.23    5.42
   7   0 -11    1.44    3.49
   7   0 -11    2.93    3.13
   7   0 -11   -1.40    6.01
   7   0 -11   -0.30    3.22
  -7   0  10   25.91    7.78
   7   0 -10   37.11    5.10
   7   0 -10   34.19    4.44
   7   0 -10   39.28    4.45
  -7   0   9   -2.01    4.71
   7   0  -9    1.50    2.98
   7   0  -9   -0.23    2.62
   7   0  -9   -0.47    2.59
   7   0  -8  607.37   28.00
  -7   0   8  608.31   33.95
  -7   0   7   -1.62    4.61
   7   0  -7   -0.48    2.73
  -7   0   6  736.72   32.53
  -7   0   6  746.72   38.32
  -7   0   5    2.18    4.00
  -7   0   5   -1.44    2.18
   7   0  -4  941.51   41.46
  -7   0   4  995.85   41.66
  -7   0   4  954.68   41.23
  -7   0   4 1033.68   47.64
  -7   0   4  956.43   41.55
  -7   0   3    1.34    4.30
  -7   0   3    2.02    1.51
  -7   0   3   -0.84    2.07
  -7   0   3    0.67    1.84
  -7   0   2 2324.54   97.37
  -7   0   2 2294.97  102.67
  -7   0   2 2318.45   97.15
  -7   0   2 2352.37   97.47
  -7   0   1    0.29    1.37
  -7   0   1   -0.15    1.75
  -7   0   1    0.69    1.83
  -7   0   0  920.48   41.12
  -7   0   0  985.22   41.21
  -7   0   0  983.17   41.51
  -7   0  -1    2.16    1.85
   7   0   1    2.34    2.81
  -7   0  -1    0.16    1.55
  -7   0  -1    0.30    1.73
   7   0   2  590.89   30.58
  -7   0  -2  575.26   25.90
  -7   0  -2  604.17   26.14
   7   0   3    0.64    3.67
  -7   0  -3   -0.47    1.98
  -7   0  -4    0.70    4.04
   7   0   4    0.67    3.80
  -7   0  -4   -0.17    1.86
  -7   0  -5    1.48    4.20
   7   0   5    0.71    3.52
  -7   0  -5    0.18    1.99
   7   0   5    0.15    1.65
   7   0   5    4.42    3.69
   7   0   6  710.73   31.85
  -7   0  -6  754.35   38.54
   7   0   6  780.96   38.48
  -7   0  -6  746.60   32.29
   7   0   6  728.73   37.15
  -7   0  -7   -2.58    4.59
   7   0   7   -3.25    4.34
  -7   0  -7   -1.98    2.26
   7   0   7   -0.18    1.92
   7   0   7    1.47    3.99
   7   0   8  906.36   40.90
   7   0   8  978.69   48.52
  -7   0  -8  976.69   41.33
   7   0   8  950.69   47.60
  -7   0  -8  966.13   49.03
  -7   0  -9    4.39    6.05
   7   0   9   -3.06    5.36
  -7   0  -9    0.25    2.57
   7   0   9    0.44    2.39
   7   0   9    2.66    4.73
  -7   0 -10  786.15   33.38
  -7   0 -10  734.85   42.73
   7   0  10  695.98   32.27
   7   0  10  752.45   41.52
  -7   0 -10  751.35   32.91
  -7   0 -11    2.02    4.28
  -7   0 -11   -5.91    8.26
   7   0  11   -3.74    6.86
  -7   0 -11    1.26    3.25
   7   0  11    0.78    2.59
  -7   0 -12  464.37   22.80
  -7   0 -12  456.06   33.55
   7   0  12  423.71   21.27
  -7   0 -12  504.60   22.35
  -7   0 -13   -3.87    4.31
  -7   0 -13   -4.39    7.55
   7   0  13    4.87    5.72
   7   0  13   -0.47    2.51
  -7   0 -14  277.51   14.38
  -7   0 -14  278.07   22.92
   7   0  14  282.13   13.34
   7   0  14  230.78   19.85
  -7   0 -14  251.75   13.21
  -7   0 -15    1.89    3.13
   7   0  15    0.17    1.91
  -7   0 -15   -2.39    2.14
   7   0  16  161.21    8.35
  -7   0 -16  174.96    9.17
  -7   0 -17   -0.65    2.27
   7   0  17   -1.09    1.42
  -7   0 -18   10.91    2.25
   7   0  18   11.39    1.53
  -7   0 -19    1.37    1.35
  -7  -1  19  120.08    5.93
  -7   1  19  118.95    5.90
  -7  -1  18   98.08    5.27
  -7   1  18   91.29    5.15
  -7  -1  17  242.31   11.63
  -7   1  17  242.14   11.61
   7  -1 -16    4.60    2.15
  -7   1  16    8.15    2.14
   7  -1 -15  194.32   10.48
  -7  -1  14   41.71    8.80
  -7   1  14   39.83    7.78
   7  -1 -14   43.02    4.66
   7  -1 -14   54.43    8.87
   7   1 -14   64.07   10.13
   7   1 -14   52.80    5.31
   7  -1 -13  213.53   18.40
   7  -1 -13  219.76   11.68
   7   1 -13  221.36   19.68
   7   1 -13  214.88   12.77
   7   1 -13  212.40   12.22
  -7   1  13  192.45   10.44
  -7  -1  13  184.12   18.56
  -7   1  13  201.04   17.90
  -7   1  13  188.74   10.35
  -7  -1  12   74.66   12.99
  -7   1  12   76.26   11.51
   7  -1 -12   77.70    6.73
   7   1 -12   86.37    8.08
   7   1 -12   71.58    7.25
   7  -1 -12   82.81   12.71
   7   1 -12  104.20    7.19
   7   1 -12   77.19   13.03
   7  -1 -12   81.92    6.52
  -7   1  12   92.92    6.17
  -7  -1  11  103.15   13.98
   7  -1 -11  101.86    7.71
   7   1 -11   89.61    8.75
   7   1 -11  119.50    8.84
   7  -1 -11  108.47   14.25
   7   1 -11  131.43   15.86
   7   1 -11  123.40    8.12
   7  -1 -11  113.46    7.70
  -7   1  11  119.45   13.43
  -7   1  11  133.19    7.95
  -7  -1  10   35.47    8.76
  -7   1  10   28.53    7.33
   7  -1 -10   40.48    4.67
   7   1 -10   31.92    4.97
   7   1 -10   42.20    4.62
   7  -1 -10   40.41    4.40
  -7   1  10   36.15    4.51
  -7  -1   9    1.08    5.29
  -7   1   9    3.84    4.69
   7  -1  -9    1.69    2.55
   7   1  -9    2.86    2.76
   7  -1  -9    6.45    2.69
  -7   1   9    1.72    2.09
  -7   1   9    2.62    2.62
   7  -1  -8  475.41   23.68
   7   1  -8  540.85   23.95
   7  -1  -8  527.70   23.76
  -7   1   8  533.21   24.01
  -7   1   8  522.58   23.96
  -7  -1   8  539.55   31.10
  -7   1   8  551.48   30.58
  -7   1   8  539.24   25.05
  -7  -1   7   53.21    8.45
  -7   1   7   74.09    8.90
   7  -1  -7   51.15    4.43
  -7  -1   7   64.42    4.88
  -7   1   7   64.77    4.67
  -7   1   7   61.05    4.59
  -7   1   7   44.62    4.70
  -7   1   7   64.92    5.30
  -7  -1   6  558.56   24.84
  -7   1   6  524.56   24.63
  -7   1   6  541.89   24.68
  -7   1   6  551.73   25.46
  -7  -1   6  578.17   30.78
  -7   1   6  532.36   30.02
  -7   1   6  585.76   25.61
  -7  -1   5  464.48   21.28
  -7   1   5  453.97   21.17
  -7   1   5  451.43   21.15
  -7   1   5  488.87   22.05
  -7  -1   5  479.17   26.77
  -7   1   5  477.19   26.48
  -7   1   5  488.79   21.91
  -7  -1   4  206.26   10.25
  -7   1   4  195.48   10.10
  -7   1   4  198.15   10.10
  -7   1   4  211.32   10.82
  -7  -1   4  203.58   14.55
  -7   1   4  196.98   14.42
  -7   1   4  190.20   10.47
  -7  -1   3  517.82   28.33
  -7  -1   3  533.40   23.52
  -7   1   3  523.23   23.42
  -7   1   3  518.13   23.43
   7   1  -3  509.08   23.37
  -7   1   3  522.21   28.31
  -7  -1   3  540.99   23.36
  -7  -1   2   32.23    3.18
  -7   1   2   39.40    3.33
  -7   1   2   44.02    3.48
   7   1  -2   32.46    3.21
  -7   1   2   38.28    3.57
  -7  -1   2   32.92    3.13
  -7   1   1 1223.13   51.65
  -7  -1   1 1220.34   51.29
  -7   1   1 1242.33   51.25
  -7   1   1 1206.03   51.43
   7   1  -1 1140.27   51.12
  -7  -1   0  111.59    6.33
  -7   1   0  118.46    6.40
  -7   1   0  117.87    6.56
   7   1   0  102.75    6.24
  -7   1   0  108.09    6.63
   7   1   1  772.12   39.23
   7  -1   1  819.60   39.52
  -7   1  -1  815.90   35.15
  -7  -1  -1  802.13   34.79
  -7   1  -1  802.89   34.78
   7   1   1  781.19   34.77
  -7   1  -1  837.31   35.29
   7   1   2  326.74   19.23
   7  -1   2  306.92   18.77
  -7   1  -2  333.22   15.15
  -7  -1  -2  322.36   14.69
  -7   1  -2  322.90   14.70
   7   1   2  325.12   14.84
  -7   1  -2  304.49   15.07
  -7   1  -3   16.70    2.61
   7   1   3   23.89    5.27
   7  -1   3   23.85    5.13
  -7  -1  -3   16.49    4.21
  -7   1  -3   20.11    2.77
  -7  -1  -3   19.49    2.50
  -7   1  -3   16.81    2.55
   7   1   3   17.93    2.52
   7   1   3   19.67    5.29
  -7  -1  -4  381.56   21.95
   7   1   4  378.64   21.63
   7  -1   4  377.96   21.56
  -7  -1  -4  338.30   20.66
  -7   1  -4  361.07   17.12
  -7  -1  -4  363.69   16.65
  -7   1  -4  364.87   16.74
   7   1   4  366.06   22.16
  -7   1  -4  344.60   21.56
   7   1   4  347.49   16.67
   7   1   5   94.27    5.98
  -7   1  -5   90.49    9.91
  -7  -1  -5  103.88   10.33
   7   1   5   93.28    9.73
   7  -1   5   94.44    9.55
  -7  -1  -5   96.31    9.59
  -7  -1  -5  106.20    6.14
  -7   1  -5  106.86    6.17
   7   1   5  106.55   10.40
   7   1   6  774.80   34.52
  -7   1  -6  780.77   40.53
  -7  -1  -6  769.97   40.29
   7   1   6  857.71   40.93
   7  -1   6  788.80   40.16
  -7  -1  -6  826.01   39.94
  -7  -1  -6  781.42   34.32
   7   1   6  838.35   41.56
  -7   1  -7   25.70    6.81
  -7  -1  -7   13.43    5.50
   7   1   7   21.98    5.99
   7  -1   7   32.68    6.44
  -7  -1  -7   19.39    4.94
  -7  -1  -7   29.90    3.23
  -7   1  -7   31.63    3.77
   7   1   7   23.02    3.18
   7   1   7   30.81    6.93
  -7   1  -8  530.80   31.63
  -7  -1  -8  513.43   31.28
   7   1   8  534.59   24.68
   7   1   8  524.32   30.97
   7  -1   8  545.92   31.11
  -7  -1  -8  506.72   29.48
  -7   1  -8  557.14   25.05
  -7  -1  -8  553.58   24.58
   7   1   8  533.44   32.05
  -7   1  -9  132.59   14.74
  -7  -1  -9  131.30   14.48
   7   1   9  145.96    8.66
   7   1   9  118.34   13.33
   7  -1   9  124.04   13.65
  -7  -1  -9  136.63   12.42
  -7   1  -9  163.42    9.31
  -7  -1  -9  144.31    8.63
   7   1   9  130.11   14.62
  -7   1 -10  225.20   12.77
  -7  -1 -10  231.95   12.68
  -7  -1 -10  237.84   20.83
   7   1  10  240.48   12.45
   7   1  10  235.98   19.27
   7  -1  10  198.18   18.25
  -7   1 -10  189.42   19.13
  -7  -1 -10  176.62   15.57
  -7   1 -10  273.13   13.33
  -7  -1 -10  207.27   12.03
   7   1  10  196.29   18.66
  -7   1 -11  562.49   27.82
  -7  -1 -11  573.46   27.89
  -7   1 -11  485.67   36.78
  -7  -1 -11  527.71   37.23
   7   1  11  574.37   27.46
   7   1  11  595.07   36.17
   7  -1  11  607.13   36.13
  -7  -1 -11  625.55   33.56
  -7   1 -11  655.57   28.62
  -7  -1 -11  650.29   27.38
   7   1  11  448.51   34.42
  -7   1 -12   24.09    4.94
  -7  -1 -12   27.39    4.99
  -7   1 -12   17.30    8.91
  -7  -1 -12   18.35    8.62
   7   1  12   26.26    8.11
   7  -1  12    9.69    6.65
  -7  -1 -12   19.44    5.45
  -7   1 -12   22.94    4.81
   7   1  12   28.06    7.83
   7   1  12   31.70    4.45
  -7  -1 -13  466.04   22.53
  -7   1 -13  450.46   31.92
  -7  -1 -13  456.89   31.55
   7   1  13  467.96   22.31
   7  -1  13  490.82   30.91
  -7   1 -13  521.92   23.41
   7   1  13  430.06   29.04
  -7   1 -13  481.11   22.67
  -7   1 -14  254.62   13.70
   7   1  14  274.30   13.59
   7   1  15  169.33    9.21
  -7  -1 -15  167.92    9.17
  -7   1 -15  178.52    9.74
  -7  -1 -15  170.28    9.49
   7   1  16   83.94    5.19
  -7   1 -16   85.74    5.80
  -7  -1 -16   77.95    5.23
  -7  -1 -16   81.41    5.36
  -7   1 -17    2.50    2.17
  -7  -1 -17    1.94    1.71
   7   1  17    0.38    1.67
  -7  -1 -17    0.82    1.61
  -7   1 -18   52.00    3.53
  -7   1 -18   53.71    3.88
   7   1  18   48.26    3.25
   7   1  19    2.90    1.03
  -7  -2  17   65.68    3.98
  -7   2  16    3.69    1.27
  -7  -2  16   11.48    1.70
  -7   2  16   10.29    1.60
  -7   2  16    2.07    1.27
  -7   2  15    0.45    1.39
  -7  -2  15   -2.14    2.24
  -7   2  15   -1.13    1.93
  -7   2  15    0.16    1.39
  -7   2  14    6.84    1.97
  -7  -2  14    6.27    2.62
  -7   2  14    7.76    2.45
  -7   2  14   10.75    2.20
  -7  -2  13  205.92   11.01
  -7   2  13  183.56   10.18
  -7   2  13  190.44   10.25
  -7  -2  13  184.82   17.26
  -7   2  13  171.32   15.32
  -7   2  13  194.48   10.31
  -7  -2  12    2.50    5.49
  -7   2  12    6.80    5.02
   7  -2 -12   -3.86    5.24
   7   2 -12    1.06    4.42
  -7  -2  12    1.83    3.25
  -7   2  12    2.84    2.46
  -7   2  12    2.18    2.17
   7   2 -11  756.26   32.88
   7  -2 -11  717.27   32.59
   7  -2 -11  722.08   41.06
   7   2 -11  774.08   42.90
  -7  -2  11  643.64   33.16
  -7   2  11  765.32   32.72
  -7   2  11  732.75   32.15
  -7  -2  11  602.94   41.18
  -7   2  11  731.37   40.10
  -7   2  11  780.18   33.63
  -7  -2  10    1.19    5.23
  -7   2  10    0.91    4.11
   7  -2 -10    1.17    5.62
   7   2 -10    6.32    6.06
  -7  -2  10    2.35    3.01
  -7   2  10    6.74    2.58
  -7   2  10    6.95    2.29
   7   2 -10    1.32    3.08
   7  -2 -10    2.74    3.00
  -7   2  10    0.68    2.89
   7  -2  -9 1003.89   55.01
   7   2  -9 1084.32   56.53
  -7  -2   9 1185.48   47.37
  -7   2   9 1102.36   46.41
   7   2  -9 1069.29   46.79
   7  -2  -9  991.69   46.44
  -7   2   9 1103.95   47.18
  -7  -2   9 1210.11   56.70
  -7   2   9 1145.68   53.55
  -7   2   9  947.01   47.39
  -7  -2   8   87.97   11.10
  -7  -2   8  115.72    7.03
  -7   2   8  110.56    6.47
  -7   2   8  116.94    7.18
  -7   2   8   75.52    6.76
   7   2  -8  111.83    6.98
   7  -2  -8  110.82    6.78
  -7   2   8  101.02   10.68
  -7   2   8  107.36    7.64
   7   2  -7  559.44   24.33
   7  -2  -7  530.19   24.12
  -7  -2   7  551.88   24.47
  -7   2   7  517.46   24.00
  -7   2   7  539.98   24.69
  -7   2   7  490.63   25.06
  -7  -2   7  575.66   31.14
  -7   2   7  521.11   29.26
  -7   2   7  558.61   25.44
  -7  -2   6   33.28    6.61
  -7   2   6   30.51    5.72
  -7  -2   6   33.24    3.44
  -7   2   6   31.61    3.17
  -7   2   6   29.07    3.42
  -7   2   6   36.37    4.19
  -7   2   6   36.26    4.07
   7   2  -5  265.47   13.10
  -7  -2   5  260.72   12.84
  -7   2   5  271.20   12.73
  -7   2   5  257.79   13.13
  -7   2   5  287.79   13.87
  -7  -2   5  253.59   17.50
  -7   2   5  244.63   13.38
  -7   2   5  259.72   17.08
  -7  -2   4   53.20    4.23
  -7   2   4   55.42    4.08
   7   2  -4   56.17    4.52
  -7   2   4   58.74    4.51
  -7   2   4   61.63    4.86
  -7   2   4   59.81    4.78
   7   2  -3    2.58    2.05
  -7   2   3    1.70    1.83
  -7  -2   3    1.17    1.74
  -7   2   3    2.41    1.76
  -7   2   3    1.37    1.95
  -7   2   3    4.43    2.11
  -7   2   2  288.41   14.09
  -7  -2   2  285.95   13.56
  -7   2   2  306.24   13.62
   7   2  -2  280.16   13.69
  -7   2   2  278.69   14.14
  -7   2   2  267.62   14.14
  -7   2   1  165.65    8.74
  -7  -2   1  153.46    8.11
  -7   2   1  158.89    8.07
   7   2  -1  154.25    8.28
  -7   2   1  133.43    8.43
   7   2   0   22.21    2.46
  -7  -2   0   28.91    2.80
  -7   2   0   27.99    2.71
  -7   2   0   28.17    3.33
   7   2   0   23.79    2.91
  -7   2  -1  368.98   17.28
  -7  -2  -1  368.86   16.58
  -7   2  -1  351.52   16.46
   7   2   1  340.68   16.70
  -7   2  -1  374.92   17.18
  -7   2  -2   14.25    2.54
  -7   2  -2   11.70    4.44
  -7  -2  -2   11.29    4.58
  -7   2  -2    9.09    2.39
   7   2   2   11.99    2.42
  -7  -2  -2   15.44    2.32
  -7   2  -2   11.09    2.15
   7   2   3  708.51   34.36
   7  -2   3  701.46   33.69
  -7   2  -3  670.28   33.92
  -7  -2  -3  705.94   34.60
  -7   2  -3  688.49   29.56
  -7  -2  -3  666.37   28.85
  -7   2  -3  636.78   28.70
   7   2   3  697.89   36.41
   7   2   3  609.89   28.95
  -7   2  -3  644.50   29.34
   7   2   4  122.50   10.38
   7  -2   4  114.39    9.85
  -7   2  -4  102.78    9.81
  -7  -2  -4  102.57   10.32
  -7   2  -4  116.70    6.95
  -7  -2  -4  111.18    6.40
  -7   2  -4  100.05    6.21
   7   2   4  110.84   11.67
   7   2   4  116.89    6.87
  -7   2  -5 1629.75   75.67
  -7  -2  -5 1682.27   76.27
   7   2   5 1681.21   75.66
   7  -2   5 1620.48   75.00
  -7   2  -5 1589.31   70.49
   7   2   5 1741.82   78.63
   7   2   5 1702.34   70.23
  -7   2  -6  305.51   20.59
  -7  -2  -6  356.09   21.71
   7   2   6  350.53   20.82
   7  -2   6  335.19   20.34
  -7   2  -6  325.72   15.88
   7   2   6  323.74   22.59
   7   2   6  316.81   15.50
  -7   2  -7  679.12   37.53
  -7  -2  -7  710.40   38.21
   7   2   7  710.62   36.74
   7  -2   7  679.26   36.24
  -7  -2  -7  664.18   37.55
   7   2   7  745.08   39.82
  -7   2  -8  121.29    7.44
  -7  -2  -8  116.33    7.47
  -7  -2  -8  112.02   13.41
   7  -2   8  105.83   11.45
  -7  -2  -8   90.07   10.89
   7   2   8   91.91   11.07
  -7   2  -8  100.41   12.49
   7   2   8  114.76   13.77
  -7  -2  -9   65.67    6.00
  -7   2  -9   46.70    5.32
   7   2   9   72.33    5.72
  -7   2  -9   41.96    9.46
  -7  -2  -9   53.02   10.62
   7   2   9   61.43    9.20
   7  -2   9   73.70    9.70
  -7  -2  -9   55.95    8.40
   7   2   9   47.46   10.06
  -7   2 -10  231.35   12.93
  -7  -2 -10  218.72   12.92
  -7  -2 -10  223.62   20.95
   7   2  10  281.73   13.44
   7   2  10  230.31   19.25
   7  -2  10  245.69   19.06
  -7  -2 -10  254.42   18.75
   7   2  10  247.86   21.69
  -7   2 -11  173.66    9.89
  -7  -2 -11  175.83   10.02
  -7   2 -11  156.40   16.72
  -7  -2 -11  148.67   16.93
   7   2  11  170.96   10.25
   7  -2  11  143.22   15.22
  -7  -2 -11  175.62   15.03
   7   2  11  135.65   15.33
   7   2  11  110.16   15.66
  -7   2 -12   96.57    6.59
  -7  -2 -12   97.50    6.65
  -7   2 -12   88.61   11.69
  -7  -2 -12   91.20   11.91
   7   2  12   75.70    6.64
  -7  -2 -12   92.10   10.46
   7   2  12   65.22   10.47
   7  -2  12   80.98   11.09
   7   2  12   91.19   12.70
   7   2  13  107.76    7.44
  -7   2 -13  101.58    6.97
  -7  -2 -13  111.41   11.43
  -7   2 -14    9.45    3.03
   7   2  14    9.42    3.11
  -7  -2 -14    9.65    3.08
   7   2  15  246.62   12.01
  -7   2 -15  233.19   11.77
  -7  -2 -15  229.56   11.91
  -7   2 -16    0.69    1.68
  -7   2 -16    0.79    2.06
   7   2  16    2.62    1.93
  -7  -2 -16   -0.50    1.82
  -7   2 -17  240.68   11.55
   7   2  17  255.77   11.43
  -7  -2 -17  233.79   11.35
   7   2  18   13.62    1.72
   7   2  19  240.76   10.49
  -7   3  16   -0.40    1.00
  -7   3  15   30.86    2.59
  -7   3  15   23.13    2.46
  -7   3  14    4.30    1.71
  -7   3  14    5.47    1.87
  -7   3  13   78.13    5.18
  -7   3  13   81.62    5.29
  -7   3  12  347.06   17.20
  -7   3  12  336.78   16.31
  -7   3  12  384.02   17.49
  -7   3  11    3.69    2.31
  -7   3  11    1.73    1.85
  -7   3  11    1.48    2.52
  -7   3  10  621.11   28.90
  -7   3  10  662.90   28.62
  -7   3  10  578.42   29.00
  -7   3   9   76.12    5.89
  -7   3   9   66.12    5.71
  -7   3   9   56.35    5.76
  -7   3   8  663.87   28.38
  -7   3   8  644.34   28.78
  -7   3   7   50.56    4.54
  -7   3   7   52.93    5.11
  -7   3   6  165.07    9.31
  -7   3   6  158.06    9.57
  -7   3   6  146.50    9.39
  -7   3   5   31.32    3.76
  -7   3   5   34.27    4.06
   7   3  -4   11.16    2.62
  -7   3   4    7.30    2.52
  -7   3   4   10.77    2.71
   7   3  -3  491.44   21.59
  -7   3   3  463.40   21.92
  -7   3   3  472.82   22.13
  -7   3   3  436.64   21.90
  -7   3   3  467.10   21.90
   7   3  -2    2.02    2.37
  -7   3   2    2.26    2.11
  -7   3   2    2.02    2.13
  -7   3   2    4.32    2.31
   7   3  -1  250.04   12.48
  -7   3   1  274.94   13.51
  -7   3   1  256.77   13.53
   7   3  -1  269.89   13.21
  -7   3   1  275.39   13.77
   7   3   0   16.43    2.68
   7   3   0   16.92    2.93
  -7   3   0   21.65    3.19
  -7   3   0   21.04    3.14
   7   3   1   53.05    4.37
   7   3   1   54.16    4.64
  -7   3  -1   57.68    4.74
   7   3   2 1166.17   49.37
   7   3   2 1135.55   49.29
   7   3   2 1178.17   50.05
  -7   3  -2 1101.44   49.43
   7   3   3    1.53    2.26
   7   3   3    2.92    2.39
   7   3   3    1.03    2.95
  -7   3  -4 1236.01   53.69
  -7   3  -4 1226.13   54.04
   7   3   4 1245.83   62.22
   7   3   4 1330.29   54.39
   7   3   4 1219.77   53.60
  -7   3  -5   69.00    5.41
  -7   3  -5   68.29    5.34
   7   3   5   75.12    5.67
   7   3   5   67.00    5.19
  -7   3  -6  346.73   18.08
  -7   3  -6  401.51   18.79
   7   3   6  420.10   18.96
   7   3   6  403.12   18.52
  -7   3  -7   61.22    5.17
   7   3   7   53.52    4.70
   7   3   7   60.01    4.81
  -7   3  -8   46.77    4.46
  -7   3  -8   57.68    5.38
   7   3   8   51.72    4.68
   7   3   8   58.95    5.00
  -7   3  -9  183.52   10.33
  -7  -3  -9  222.27   18.01
  -7   3  -9  191.09   11.64
   7   3   9  207.38   19.71
   7   3   9  243.63   11.78
   7   3  10    8.67    3.36
  -7   3 -10    3.77    2.82
  -7  -3 -10    0.98    3.77
  -7   3 -10    0.93    3.27
   7   3  10    4.86    3.28
   7   3  10   12.64    7.13
   7   3  11  163.79    9.59
  -7   3 -11  157.40    8.58
  -7   3 -11  162.86    9.41
  -7   3 -12   10.17    2.66
   7   3  12    8.59    3.40
   7   3  13   78.29    5.94
  -7   3 -13   81.33    5.42
  -7  -3 -13   84.67    5.97
  -7   3 -14   39.51    3.56
  -7  -3 -14   41.70    3.87
  -7   3 -15   21.81    2.77
  -7  -3 -15   32.25    2.98
   7   3  16  372.80   16.57
  -7  -3 -16  370.44   16.60
  -7   4  14  129.14    6.61
  -7   4  14  129.94    6.71
  -7   4  13   25.83    2.53
  -7   4  13   17.49    1.89
  -7   4  13   22.49    2.44
  -7   4  12   24.54    2.91
  -7   4  12   24.27    2.43
  -7   4  12   25.80    2.95
  -7   4  11    2.28    2.01
  -7   4  11    1.96    1.70
  -7   4  11    3.07    2.16
  -7   4  10   22.11    3.23
  -7   4  10   15.98    2.66
   7   4 -10   18.22    2.73
  -7   4   9   10.84    2.76
  -7   4   9    8.77    2.51
   7   4  -9    6.76    2.47
  -7   4   8    3.72    2.31
  -7   4   8    0.58    2.39
   7   4  -8    1.24    2.53
  -7   4   7  108.34    7.82
   7   4  -7  131.58    8.30
  -7   4   7  116.22    7.88
  -7   4   7  133.14    7.62
  -7   4   6  251.47   13.56
   7   4  -6  253.62   13.86
  -7   4   6  249.92   13.32
  -7   4   6  252.17   12.85
  -7   4   5  219.73   11.78
   7   4  -5  193.62   12.14
  -7   4   5  205.41   11.38
  -7   4   5  209.02   10.92
  -7   4   4  900.71   39.24
   7   4  -4  845.53   39.87
  -7   4   4  877.94   38.53
  -7   4   3   13.89    3.08
  -7   4   3   17.81    2.91
   7   4  -2  705.71   32.37
  -7   4   2  791.26   33.74
  -7   4   2  775.90   33.32
   7   4  -1   34.67    3.42
   7   4  -1   33.68    3.71
  -7   4   1   44.99    4.22
   7   4  -1   40.26    5.09
  -7   4   1   41.74    4.02
  -7   4   0  365.85   17.92
   7   4   0  421.92   18.62
  -7   4   0  401.74   19.21
   7   4   0  410.97   19.83
  -7   4   0  403.09   18.80
  -7   4  -1   24.58    3.20
   7   4   1   27.74    3.30
  -7   4  -1   27.10    2.98
   7   4   1   24.64    3.31
  -7   4  -1   26.19    3.50
   7   4   1   26.30    4.03
   7   4   2   47.09    4.29
  -7   4  -2   41.13    3.79
  -7   4  -2   50.47    4.54
   7   4   2   50.11    4.31
   7   4   2   56.65    5.30
   7   4   3    2.46    2.24
  -7   4  -3    3.51    2.14
   7   4   3    6.15    2.33
  -7   4  -3    2.75    2.32
   7   4   3    5.23    2.98
   7   4   4    3.63    2.40
  -7   4  -4    5.07    2.43
   7   4   4    6.66    2.37
  -7   4  -4    3.19    2.03
   7   4   4    4.32    3.13
   7   4   5  261.63   13.49
  -7   4  -5  254.79   13.47
   7   4   5  270.41   13.13
   7   4   5  286.23   14.27
   7   4   6   24.42    3.39
  -7   4  -6   22.55    3.52
   7   4   6   23.93    3.21
   7   4   6   22.69    3.91
   7   4   7  251.60   12.54
   7   4   7  244.43   11.87
   7   4   7  236.61   12.60
   7   4   7  247.53   13.94
   7   4   8  163.56    9.23
  -7   4  -8  131.45    8.59
   7   4   8  165.70    8.64
   7   4   8  139.83    8.95
   7   4   8  163.07   10.44
   7   4   9   93.51    6.90
   7   4   9  104.70    6.40
   7   4   9   86.65    7.58
   7   4  10  393.07   20.56
  -7  -4 -10  446.67   20.04
   7   4  10  405.48   21.11
   7   4  11   10.79    2.87
   7   4  11   10.08    2.68
  -7  -4 -11   11.53    2.37
   7   4  12  390.47   18.89
  -7  -4 -12  444.41   18.90
  -7  -4 -13    6.74    1.73
   7   4  14  182.39    8.55
  -7  -4 -14  168.78    8.32
  -7   5  11   65.94    4.02
  -7   5  10   82.00    5.02
  -7   5  10   87.31    4.92
  -7   5   9    8.37    1.88
  -7   5   9    8.18    1.81
  -7   5   8   19.74    2.59
  -7   5   8   23.91    2.86
  -7   5   7  148.21    7.48
  -7   5   7  134.36    7.61
  -7   5   6    2.79    1.66
  -7   5   6   -0.22    1.84
   7   5  -6    3.19    2.43
  -7   5   5  271.28   13.20
   7   5  -5  272.16   13.91
  -7   5   4    3.41    1.88
   7   5  -4    1.98    2.71
  -7   5   3  405.30   18.14
   7   5  -3  360.06   18.99
   7   5  -3  389.65   19.66
   7   5  -2    5.05    3.82
  -7   5   2   -0.19    1.64
  -7   5   1  383.43   18.19
   7   5  -1  409.47   21.06
   7   5   0    3.89    4.49
  -7   5   0    0.39    1.70
   7   5   0    3.20    2.90
   7   5   1  313.98   14.45
  -7   5  -1  301.24   14.73
   7   5   1  311.33   15.74
   7   5   1  296.56   17.88
   7   5   2   61.05    7.49
   7   5   2   44.97    3.88
  -7   5  -2   53.39    4.19
   7   5   2   60.74    5.25
   7   5   3   60.88    4.44
   7   5   3   69.07    5.64
   7   5   4  115.99    7.46
   7   5   4   96.38    8.73
   7   5   5   86.82    6.38
   7   5   5   91.01    7.77
   7   5   6  124.72    6.83
   7   5   6  109.28    7.33
   7   5   6  101.01    8.06
   7   5   7  214.19   10.49
   7   5   7  184.76   11.35
   7   5   8    7.63    3.08
   7   5   8    6.87    2.12
   7   5   9  151.56    8.44
   7   5   9  172.55    9.02
   7   5  10    8.37    1.92
   7   6  -2   26.27    3.15
   7   6  -1    9.53    2.52
  -8   0  18  186.15    8.75
  -8   0  17   -1.70    1.61
  -8   0  16   63.84    4.47
  -8   0  15   -3.15    2.09
  -8   0  14  119.50    7.79
  -8   0  13   -3.60    5.51
   8   0 -13    2.58    6.31
   8   0 -13   -0.83    3.31
  -8   0  13   -1.17    3.07
   8   0 -12  872.44   51.40
   8   0 -12  918.28   40.26
  -8   0  12  881.27   40.27
  -8   0  12  852.78   49.46
  -8   0  11   -3.82    5.46
   8   0 -11   -1.43    7.00
   8   0 -11    0.30    3.32
  -8   0  11    0.31    3.23
  -8   0  10  608.80   29.43
   8   0 -10  672.22   29.49
  -8   0  10  621.28   37.90
  -8   0   9    4.35    5.01
   8   0  -9    0.25    2.67
  -8   0   9   -1.89    2.70
  -8   0   8  138.38    8.49
  -8   0   8  137.84   13.98
  -8   0   8  144.28    8.79
  -8   0   7   -0.92    4.39
  -8   0   7    0.91    2.46
  -8   0   7    0.25    2.11
  -8   0   6  453.19   21.81
  -8   0   6  473.71   28.01
  -8   0   6  496.55   22.15
  -8   0   5    3.32    3.98
  -8   0   5    2.90    2.19
  -8   0   5   -2.17    2.10
  -8   0   4 1014.75   43.93
  -8   0   4 1000.53   50.27
  -8   0   4 1015.30   43.97
   8   0  -3   -0.19    2.06
  -8   0   3    1.07    1.62
  -8   0   3   -0.60    2.33
  -8   0   3    1.85    1.93
  -8   0   2  301.81   14.69
   8   0  -2  308.08   14.61
  -8   0   2  303.95   14.47
  -8   0   2  302.32   14.76
  -8   0   1    1.47    1.98
   8   0  -1    1.77    1.98
  -8   0   1    0.18    1.70
  -8   0   1   -0.57    1.96
  -8   0   0  419.01   19.44
  -8   0   0  434.37   19.45
   8   0   0  415.43   19.22
  -8   0   0  415.93   19.66
   8   0   1   -0.68    1.84
  -8   0  -1    2.31    1.85
  -8   0  -1    0.91    1.90
   8   0   2 1623.02   73.51
  -8   0  -2 1618.53   67.27
   8   0   2 1554.67   67.02
   8   0   3    0.76    4.24
   8   0   3   -1.00    1.88
  -8   0  -3   -0.37    2.14
  -8   0  -4  969.83   46.76
   8   0   4 1025.33   46.87
  -8   0  -4  928.16   40.08
   8   0   4  890.45   39.71
  -8   0  -5    8.34    4.31
   8   0   5    5.61    3.77
   8   0   5    0.52    1.86
  -8   0  -5    0.40    2.17
  -8   0  -6  838.72   42.83
   8   0   6  831.97   42.37
  -8   0  -6  842.95   35.96
   8   0   6  786.22   35.44
  -8   0  -7   -3.78    5.28
   8   0   7   -0.90    4.66
  -8   0  -7    3.48    2.58
   8   0   7    0.39    2.02
  -8   0  -8  451.90   28.22
   8   0   8  455.02   27.75
  -8   0  -8  446.07   20.63
   8   0   8  421.47   20.19
  -8   0  -9   -9.41    7.14
   8   0   9   -9.82    6.10
  -8   0  -9    1.30    2.79
   8   0   9    0.23    2.38
  -8   0 -10  186.23   10.91
  -8   0 -10  199.01   19.22
   8   0  10  171.64   16.80
  -8   0 -10  182.44   10.47
   8   0  10  156.86    9.65
  -8   0 -11    1.02    4.27
   8   0  11   -6.30    6.16
  -8   0 -11    3.11    3.46
   8   0  11   -0.50    2.59
  -8   0 -12    3.09    4.20
   8   0  12   -3.76    7.80
  -8   0 -12   10.78    3.25
   8   0  12    0.23    2.57
  -8   0 -13    0.90    3.81
  -8   0 -13   -1.37    6.44
   8   0  13    0.20    2.40
  -8   0 -14  141.07    8.52
   8   0  14  138.42    7.28
  -8   0 -15   -0.20    2.54
   8   0  15    0.26    1.65
  -8   0 -16  300.62   13.75
   8   0  16  281.69   12.95
  -8   0 -17    0.37    1.76
  -8  -1  18   93.93    4.75
  -8   1  18   87.06    4.66
  -8  -1  17   21.40    2.09
  -8   1  17   24.91    2.14
  -8  -1  16   38.78    3.33
  -8   1  16   32.19    2.73
  -8  -1  15   13.07    2.56
  -8   1  15   13.95    2.54
  -8  -1  14   32.82    4.06
  -8   1  14   32.42    3.67
  -8  -1  13   43.49    9.15
  -8   1  13   24.31    6.79
  -8  -1  13   38.81    4.63
  -8   1  13   29.80    4.07
  -8  -1  12  149.56   17.96
  -8   1  12  129.56   15.63
   8   1 -12  200.26   10.50
   8  -1 -12  142.06   16.99
   8   1 -12  161.90   18.49
   8  -1 -12  173.78   10.01
  -8  -1  12  159.92   10.43
  -8   1  12  160.26    9.89
   8  -1 -11  176.45   19.44
   8   1 -11  203.93   20.96
   8   1 -11  222.67   12.38
  -8  -1  11  223.11   12.75
  -8   1  11  240.04   12.43
   8  -1 -11  212.81   12.12
  -8   1  11  216.18   11.71
  -8  -1  11  225.99   20.86
  -8   1  11  210.63   18.88
   8  -1 -10  212.09   19.99
  -8  -1  10  252.43   13.07
  -8   1  10  246.06   12.47
  -8   1  10  180.29   11.67
   8   1 -10  241.77   12.54
   8  -1 -10  233.48   12.24
  -8  -1  10  216.30   19.95
  -8   1  10  217.06   18.52
  -8  -1   9  664.85   28.84
  -8   1   9  617.44   28.22
  -8   1   9  547.66   28.00
  -8  -1   9  638.56   37.26
  -8   1   9  617.09   35.66
   8   1  -9  650.91   28.31
   8  -1  -9  613.86   28.02
  -8  -1   8    5.22    4.81
  -8   1   8   -1.90    4.56
  -8   1   8    5.15    2.36
   8   1  -8    7.07    2.77
  -8  -1   8    4.39    2.79
  -8   1   8    2.58    2.52
   8  -1  -8    5.90    2.86
  -8  -1   7  534.11   24.58
  -8   1   7  527.36   24.35
  -8   1   7  547.60   24.61
  -8  -1   7  522.15   31.13
  -8   1   7  503.75   30.32
  -8  -1   6  530.91   24.11
  -8   1   6  512.19   23.89
  -8   1   6  531.07   24.05
  -8  -1   6  508.39   30.09
  -8   1   6  553.25   30.35
  -8  -1   5  237.80   11.98
  -8   1   5  236.14   11.88
  -8   1   5  231.87   11.86
  -8  -1   5  245.83   17.44
  -8   1   5  210.42   16.52
   8   1  -4  732.19   32.14
  -8  -1   4  742.60   32.16
  -8   1   4  739.05   32.05
  -8   1   4  696.13   31.96
  -8  -1   4  744.15   38.44
  -8   1   4  718.64   37.96
  -8   1   4  715.20   32.31
   8   1  -3   30.13    3.45
  -8  -1   3   31.74    3.42
  -8   1   3   25.46    3.04
  -8   1   3   26.99    3.26
  -8  -1   3   35.22    3.47
  -8   1   3   27.68    3.36
  -8  -1   2  430.38   19.31
  -8   1   2  424.48   19.23
  -8   1   2  382.78   19.07
   8   1  -2  427.81   19.24
  -8   1   2  403.99   19.49
   8  -1  -1   41.23    3.55
  -8  -1   1   41.66    3.79
  -8   1   1   41.90    3.72
  -8   1   1   39.79    3.64
   8   1  -1   39.96    3.78
  -8   1   1   47.53    4.19
   8  -1   0  179.04    9.35
  -8  -1   0  199.20    9.90
  -8   1   0  180.79    9.69
  -8   1   0  200.94   10.01
   8   1   0  175.30    9.64
  -8   1   0  187.49   10.16
  -8   1  -1  220.64   11.24
  -8  -1  -1  221.70   10.99
  -8   1  -1  204.01   10.83
   8   1   1  208.62   10.91
  -8   1  -1  226.52   11.49
   8  -1   2  220.14   15.90
  -8   1  -2  233.21   11.81
  -8  -1  -2  227.00   11.37
  -8   1  -2  218.09   11.29
   8   1   2  232.68   11.48
  -8   1  -2  225.12   11.88
   8   1   2  213.42   15.95
   8   1   3  496.33   28.40
   8  -1   3  522.23   28.41
  -8   1  -3  510.80   28.75
  -8  -1  -3  521.43   28.92
  -8   1  -3  511.02   23.43
  -8  -1  -3  493.25   22.84
  -8   1  -3  514.18   22.93
   8   1   3  502.48   22.95
  -8   1  -4  229.37   17.81
  -8  -1  -4  260.99   18.30
   8   1   4  284.60   18.65
   8  -1   4  273.09   18.14
  -8   1  -4  282.57   13.80
  -8  -1  -4  267.00   13.08
  -8   1  -4  261.58   13.08
   8   1   4  262.82   13.08
  -8   1  -5  661.39   35.86
  -8  -1  -5  662.02   35.87
   8   1   5  697.28   36.03
   8  -1   5  691.82   35.67
  -8  -1  -5  673.37   29.71
  -8   1  -5  665.25   29.73
   8   1   5  692.01   36.77
   8   1   5  654.37   29.67
  -8   1  -6   12.32    4.86
  -8  -1  -6    6.92    4.99
   8   1   6    4.16    4.31
   8  -1   6    9.73    4.93
  -8  -1  -6   11.75    4.20
  -8  -1  -6    6.94    2.30
   8   1   6    6.03    2.32
   8   1   6    5.63    5.02
  -8   1  -7  604.44   33.97
  -8  -1  -7  564.08   33.28
   8   1   7  586.25   33.06
  -8  -1  -7  525.89   31.31
  -8   1  -7  598.46   26.96
  -8  -1  -7  585.24   26.46
   8   1   7  637.27   34.85
   8   1   7  590.03   26.65
   8  -1   7  605.65   33.18
  -8   1  -8  297.96   22.28
  -8  -1  -8  318.43   22.58
   8   1   8  327.14   22.11
   8  -1   8  338.43   22.20
  -8  -1  -8  263.52   19.46
  -8   1  -8  310.96   15.65
  -8  -1  -8  318.56   15.25
   8   1   8  264.85   21.88
   8   1   8  310.12   15.36
   8   1   9   68.77    5.41
  -8   1  -9   33.16    9.47
  -8  -1  -9   57.74   10.25
   8   1   9   53.93    9.22
   8  -1   9   59.71    9.30
  -8  -1  -9   60.60    8.20
  -8   1  -9   66.93    5.65
  -8  -1  -9   54.53    4.93
   8   1   9   40.05    9.21
  -8   1 -10  586.98   26.74
  -8  -1 -10  580.75   26.64
   8   1  10  583.00   26.37
  -8   1 -10  584.83   36.75
  -8  -1 -10  485.21   34.74
   8   1  10  584.27   34.62
   8  -1  10  531.22   33.71
  -8   1 -10  615.13   26.98
  -8  -1 -10  526.51   25.95
   8   1  10  418.80   32.75
  -8   1 -11   -0.33    4.30
  -8  -1 -11    2.22    3.73
  -8   1 -11    2.91    8.59
  -8  -1 -11   -5.63    8.44
   8   1  11   -1.20    5.99
   8  -1  11   -3.54    6.51
  -8   1 -11    0.69    3.72
  -8  -1 -11    0.24    2.64
   8   1  11    0.58    2.92
   8   1  11    3.51    5.73
  -8   1 -12  108.68    8.03
  -8  -1 -12  105.44    7.87
   8   1  12   98.27    7.18
  -8   1 -12   99.21   14.59
  -8  -1 -12   91.90   13.36
   8   1  12   75.03   11.71
   8  -1  12   78.61   11.52
  -8   1 -12  113.68    8.16
   8   1  12   99.96   11.90
  -8   1 -13    8.82    3.61
  -8  -1 -13    6.47    3.61
  -8   1 -13    6.50    3.61
   8   1  13    5.30    2.80
   8   1  14  124.14    7.30
  -8  -1 -15   86.69    5.45
  -8   1 -15   88.09    5.86
  -8  -1 -15   76.16    5.42
   8   1  15   95.89    5.46
  -8   1 -16   38.70    3.45
  -8  -1 -16   33.63    3.02
  -8  -1 -16   35.29    3.02
   8   1  16   33.46    2.86
  -8   1 -17  230.42   10.97
   8   1  17  231.21   10.50
  -8   1 -18   20.36    2.14
   8   1  18   21.22    1.67
  -8  -2  16    2.11    1.28
  -8  -2  15  332.86   14.77
  -8   2  15  310.92   14.53
  -8   2  14   14.52    1.99
  -8  -2  14   13.39    2.56
  -8   2  14    8.08    2.12
  -8  -2  13  330.43   14.86
  -8   2  13  287.49   14.16
  -8   2  13  295.55   14.19
  -8   2  13  273.71   14.10
  -8   2  12   22.87    3.13
  -8  -2  12   22.02    3.72
  -8   2  12   20.09    3.12
  -8   2  12   20.32    3.11
  -8  -2  11   71.92   12.09
  -8   2  11  101.10   11.62
   8   2 -11  118.34    7.17
   8  -2 -11  110.71    6.99
   8  -2 -11  108.94   12.75
   8   2 -11  108.61   13.24
  -8  -2  11   87.22    7.23
  -8   2  11  117.79    6.94
  -8   2  11  101.79    7.08
  -8   2  11  115.88    7.58
  -8  -2  10    3.55    5.68
  -8   2  10   -2.72    4.84
   8  -2 -10    3.50    6.03
   8   2 -10    2.55    6.12
  -8   2  10    4.94    2.54
  -8  -2  10   -1.45    3.03
  -8   2  10    1.33    2.25
  -8   2  10    0.81    1.76
   8   2 -10    0.53    3.14
   8  -2 -10    3.21    2.82
  -8   2  10    3.72    3.10
  -8  -2   9   15.57    8.65
  -8   2   9   33.82    7.56
   8  -2  -9   21.67    8.86
   8   2  -9   24.59    9.81
  -8  -2   9   53.50    5.08
  -8   2   9   47.43    4.16
  -8   2   9   39.11    4.46
   8   2  -9   56.64    4.87
   8  -2  -9   49.75    4.38
  -8   2   9   38.04    4.10
  -8   2   9   38.87    5.09
  -8  -2   8   34.62    7.86
  -8   2   8   36.20    6.75
  -8   2   8   37.24    3.71
  -8   2   8   45.73    4.56
  -8  -2   8   37.92    4.30
  -8   2   8   34.05    4.36
   8  -2  -8   35.06    4.08
   8   2  -8   47.69    4.61
  -8   2   8   44.03    5.03
   8   2  -7   54.91    4.83
   8  -2  -7   64.83    4.87
  -8  -2   7   52.31    8.61
  -8   2   7   56.49    8.01
  -8  -2   7   57.39    4.88
  -8   2   7   61.87    4.56
  -8   2   7   62.83    5.07
  -8   2   7   47.45    5.24
  -8   2   7   64.04    5.67
  -8  -2   6  119.49    7.09
  -8   2   6  109.98    6.66
  -8   2   6  117.77    7.29
  -8   2   6  109.42    7.79
  -8   2   6  107.05    7.63
  -8  -2   5  337.60   15.60
  -8   2   5  323.85   15.29
  -8   2   5  309.24   15.73
  -8   2   5  311.52   16.39
   8   2  -4   14.23    2.98
  -8   2   4   13.59    2.67
  -8  -2   4   17.87    2.92
  -8   2   4   16.72    2.66
  -8   2   4   14.43    3.11
  -8   2   4   14.54    3.00
   8   2  -3 1081.45   48.19
  -8   2   3 1080.49   48.40
  -8  -2   3 1154.57   48.11
  -8   2   3 1139.10   47.98
  -8   2   3 1119.89   48.66
   8   2  -2   27.86    3.47
  -8   2   2   29.21    3.49
  -8  -2   2   31.87    3.42
  -8   2   2   32.27    3.31
  -8   2   2   31.00    3.75
  -8   2   1  767.45   34.45
  -8  -2   1  795.44   33.95
  -8   2   1  785.64   33.84
   8   2  -1  742.53   34.04
   8   2   0    1.47    2.24
  -8   2   0   -1.23    2.09
  -8  -2   0    3.16    1.88
  -8   2   0    6.97    1.88
  -8   2  -1  758.31   31.57
  -8  -2  -1  734.16   30.74
  -8   2  -1  709.17   30.58
  -8   2  -2   91.18   10.02
  -8  -2  -2   90.54   10.43
  -8   2  -2  105.45    6.96
  -8  -2  -2  112.57    6.44
  -8   2  -2  104.74    6.25
  -8   2  -3   48.67    7.29
  -8  -2  -3   56.45    8.29
  -8   2  -3   52.93    4.75
  -8  -2  -3   53.77    4.26
  -8   2  -3   52.89    4.17
   8  -2   4  120.68   10.89
  -8   2  -4  100.31   10.70
  -8  -2  -4   94.38   10.81
  -8   2  -4  116.10    7.37
  -8  -2  -4  117.71    6.85
  -8   2  -4  111.44    6.66
   8   2   4  109.51    6.96
   8   2   4   99.16   10.53
  -8   2  -5   14.55    5.28
  -8  -2  -5    9.24    5.18
   8   2   5    8.49    4.82
   8  -2   5    9.60    4.55
  -8  -2  -5   11.80    4.29
  -8   2  -5   10.81    2.77
   8   2   5    9.23    5.49
   8   2   5    8.30    2.47
   8   2   6  152.12   12.97
   8  -2   6  140.40   12.43
  -8   2  -6  153.76   13.70
  -8  -2  -6  140.41   13.80
  -8  -2  -6  139.63   12.65
   8   2   6  163.72   15.27
   8   2   6  133.65    7.87
   8   2   7  196.20   16.44
   8  -2   7  202.67   16.32
  -8   2  -7  215.76   17.53
  -8  -2  -7  204.64   17.81
  -8  -2  -7  212.32   16.34
   8   2   7  217.11   18.78
   8   2   7  233.75   11.75
  -8   2  -8  168.01    9.70
  -8  -2  -8  173.41    9.90
   8   2   8  148.78   14.43
   8  -2   8  158.30   14.25
  -8   2  -8  155.09   15.78
  -8  -2  -8  155.55   16.31
  -8  -2  -8  145.60   13.32
   8   2   8  163.11   16.74
   8   2   8  184.00    9.94
  -8   2  -9  230.30   12.49
  -8  -2  -9  239.75   12.73
  -8   2  -9  157.26   18.09
  -8  -2  -9  222.14   20.61
   8   2   9  210.75   17.86
   8  -2   9  202.61   17.47
  -8  -2  -9  197.44   16.16
   8   2   9  237.22   20.80
   8   2   9  268.28   12.86
  -8   2 -10    3.33    3.48
  -8  -2 -10    0.87    3.72
  -8   2 -10    3.73    6.31
  -8  -2 -10   -7.79    7.27
   8   2  10    1.01    4.66
   8  -2  10   -1.95    4.86
  -8  -2 -10   -2.43    3.80
   8   2  10    1.45    3.18
   8   2  10   -4.03    6.18
  -8   2 -11  796.25   34.34
  -8  -2 -11  861.72   34.72
  -8  -2 -11  780.58   44.25
  -8  -2 -11  790.40   40.33
   8   2  11  736.61   34.63
  -8  -2 -12   52.28    4.88
  -8   2 -12   38.08    4.33
   8   2  12   45.07    4.87
  -8   2 -13  530.58   24.18
   8   2  13  531.23   24.48
  -8   2 -14   -0.17    2.25
   8   2  14   -0.96    2.28
  -8  -2 -14    0.21    2.16
  -8   2 -15  157.76    8.26
  -8  -2 -15  149.18    8.26
   8   2  15  170.24    8.37
  -8   2 -16    4.99    1.86
   8   2  16    3.10    1.60
  -8  -2 -16    7.22    1.66
  -8   2 -17    5.30    1.59
   8   2  17    6.19    1.38
   8   2  18   38.15    2.21
  -8   3  15   10.36    1.63
  -8   3  14  253.95   11.83
  -8   3  13    5.82    1.85
  -8   3  12  244.00   11.99
  -8   3  12  223.70   11.86
  -8   3  11    9.27    2.68
  -8   3  11   15.32    2.21
  -8   3  11   15.22    3.08
  -8   3  10   16.81    3.26
  -8   3  10   20.68    2.81
  -8   3  10   16.57    3.39
  -8   3   9   77.01    6.00
  -8   3   9   70.82    5.59
  -8   3   9   70.74    6.14
  -8   3   8   17.59    3.29
  -8   3   8    7.71    2.93
  -8   3   8   11.39    3.23
  -8   3   7  108.53    7.18
  -8   3   7  112.92    7.74
  -8   3   6  214.04   11.58
  -8   3   6  201.29   11.83
  -8   3   6  214.64   11.97
  -8   3   5   22.99    3.35
  -8   3   5   30.34    3.94
  -8   3   5   30.38    3.63
  -8   3   4  293.19   14.67
  -8   3   4  278.01   14.84
  -8   3   4  291.34   14.68
   8   3  -3    2.90    2.47
  -8   3   3    4.44    2.39
  -8   3   3    3.88    2.29
  -8   3   3    1.04    2.40
   8   3  -2  648.21   29.18
  -8   3   2  648.95   29.58
  -8   3   2  648.28   29.56
   8   3  -1   -0.23    2.38
  -8   3   1    0.27    2.22
  -8   3   1    1.30    2.33
  -8   3   0  856.13   38.26
   8   3   0  865.75   37.83
  -8   3   0  850.43   38.10
  -8   3  -1    5.40    2.55
   8   3   1    3.00    1.73
   8   3   1    5.18    2.59
  -8   3  -1    7.28    2.65
   8   3   1    4.73    3.22
   8   3   2  203.56   11.02
   8   3   2  229.04   11.60
   8   3   2  228.58   12.05
  -8   3  -2  221.20   11.73
   8   3   3  235.09   12.30
  -8   3  -3  250.73   12.65
   8   3   3  259.56   12.76
   8   3   3  243.53   13.03
   8   3   4    1.95    2.10
  -8   3  -4   -0.23    2.54
   8   3   4    1.11    2.28
   8   3   4    1.54    2.68
  -8   3  -5  333.91   16.24
  -8   3  -5  362.12   16.88
   8   3   5  332.60   16.55
   8   3   5  347.51   16.83
  -8   3  -6   47.14    4.43
   8   3   6   47.62    4.56
   8   3   6   52.04    4.74
  -8   3  -7   46.43    4.56
  -8   3  -7   55.44    5.12
   8   3   7   63.58    5.08
   8   3   7   51.80    4.59
   8   3   7   58.58   10.49
  -8   3  -8   38.90    4.59
   8   3   8   41.42    4.43
   8   3   8   28.89    8.15
  -8   3  -9   50.81    5.21
   8   3   9   53.06    4.95
  -8   3 -10  200.98   10.06
  -8   3 -10  180.49   10.86
   8   3  10  197.14   10.90
   8   3  10  178.69   10.92
  -8   3 -11   10.32    2.57
  -8   3 -11    4.90    2.81
   8   3  11    9.67    3.29
  -8   3 -12  485.87   21.65
  -8   3 -13   20.73    2.69
  -8  -3 -13   24.42    3.04
  -8   3 -14  413.52   18.49
  -8  -3 -14  425.74   18.91
  -8  -3 -15   47.81    3.33
  -8   4  13    7.33    1.36
  -8   4  13    6.19    1.35
  -8   4  12   51.31    3.62
  -8   4  12   51.56    3.72
  -8   4  11   13.08    2.25
  -8   4  11    5.60    1.99
  -8   4  10  316.20   15.89
  -8   4  10  356.88   15.65
   8   4 -10  318.66   15.34
  -8   4  10  344.97   16.03
  -8   4   9    3.28    2.14
  -8   4   9    4.16    1.97
   8   4  -9    1.12    1.93
  -8   4   9    2.16    2.10
  -8   4   8  670.00   28.95
   8   4  -8  651.49   28.64
  -8   4   8  674.60   28.70
  -8   4   7    7.16    2.45
  -8   4   7   13.32    3.05
   8   4  -7    7.39    3.01
  -8   4   7    5.72    2.21
  -8   4   6  311.86   15.67
  -8   4   6  321.15   16.09
   8   4  -6  342.67   16.65
  -8   4   6  305.94   15.40
  -8   4   5   27.10    3.21
  -8   4   5   20.99    3.38
  -8   4   5   21.87    2.95
  -8   4   4  147.19    8.69
  -8   4   4  134.72    8.00
  -8   4   3  108.92    6.80
  -8   4   2   13.51    2.66
   8   4  -2   12.13    3.88
   8   4  -1   69.15    5.11
   8   4  -1   73.83    6.36
  -8   4   1   68.84    5.16
  -8   4   0   38.91    3.46
   8   4   0   43.71    4.12
  -8   4   0   45.20    4.32
   8   4   0   50.41    5.12
  -8   4   0   50.34    4.23
  -8   4  -1  117.90    7.09
   8   4   1  129.89    7.56
  -8   4  -1  136.35    8.01
   8   4   1  138.03    8.50
   8   4   2  222.22   11.76
  -8   4  -2  222.22   11.77
  -8   4  -2  263.07   12.80
   8   4   2  252.97   12.12
   8   4   2  263.91   13.15
   8   4   3   99.65    6.14
  -8   4  -3   93.38    6.18
  -8   4  -3   93.18    6.56
   8   4   3  105.78    6.32
   8   4   3  108.67    7.11
   8   4   4  611.44   27.96
  -8   4  -4  602.58   28.05
  -8   4  -4  652.68   28.68
   8   4   4  645.54   27.97
   8   4   4  641.80   28.80
   8   4   5   15.97    2.79
  -8   4  -5   12.01    3.05
   8   4   5   21.60    2.86
   8   4   5   19.42    3.43
   8   4   6  709.01   30.19
   8   4   6  721.59   29.97
   8   4   6  710.31   30.60
   8   4   7    6.52    3.44
   8   4   7    2.41    2.35
  -8   4  -7    2.37    2.62
   8   4   7    3.37    2.30
   8   4   7    6.72    2.74
   8   4   8  189.83   10.30
   8   4   8  203.44   10.08
   8   4   8  173.91   11.17
   8   4   9   40.98    4.95
   8   4   9   49.63    4.55
   8   4  10    8.95    2.83
   8   4  10    8.52    2.49
   8   4  10    8.49    2.60
  -8  -4 -10   13.16    2.33
   8   4  11   54.68    4.22
  -8  -4 -11   56.86    3.86
   8   4  12   34.43    3.00
  -8  -4 -12   34.08    2.77
   8   4  13    9.21    1.53
  -8   5   8    5.46    1.51
  -8   5   7  238.31   10.94
   8   5  -7  210.37   10.70
  -8   5   6    6.66    1.75
   8   5  -6    6.62    2.16
  -8   5   5  129.44    7.06
   8   5  -5  130.79    7.69
  -8   5   4   14.37    2.16
   8   5  -4   13.42    3.04
  -8   5   3   58.19    4.10
   8   5  -3   50.84    5.16
  -8   5   2  143.68    7.52
   8   5  -2  122.67    9.06
   8   5  -1    2.98    3.79
  -8   5   1    2.37    1.68
   8   5  -1    6.30    2.90
   8   5   0   36.59    5.76
  -8   5   0   37.87    3.27
   8   5   0   32.62    4.02
  -8   5  -1  245.50   11.92
   8   5   1  259.70   12.85
   8   5   1  220.10   14.47
   8   5   2   -1.17    2.51
   8   5   3  303.25   14.90
   8   5   4    1.43    3.54
   8   5   4    3.87    2.36
   8   5   5  208.16   11.03
   8   5   5  223.42   12.37
   8   5   6   -1.36    2.79
   8   5   6    3.33    1.60
   8   5   7  216.46   11.47
   8   5   8    3.59    1.99
  -9   0  17   -0.92    1.08
  -9   0  16  361.12   16.21
  -9   0  15   -1.64    1.79
  -9   0  14  250.65   12.62
   9   0 -13    0.46    2.77
  -9   0  13   -2.51    2.65
   9   0 -12  160.03    9.76
  -9   0  12  169.85   10.04
  -9   0  11    1.21    5.08
   9   0 -11    0.83    3.17
   9   0 -11   -1.33    6.51
  -9   0  11   -1.48    3.19
  -9   0  10  151.33    9.28
   9   0 -10  165.15    9.22
  -9   0  10  157.55   16.25
  -9   0  10  122.22    8.73
  -9   0   9   -1.12    5.14
   9   0  -9    0.99    2.85
  -9   0   9   -0.55    2.92
  -9   0   9    0.90    2.54
   9   0  -8   37.97    4.06
  -9   0   8   37.65    4.09
  -9   0   8   28.23    4.17
  -9   0   7    1.96    4.70
  -9   0   7    0.73    2.43
  -9   0   7    0.86    2.45
  -9   0   6   10.32    5.10
  -9   0   6    5.13    2.52
  -9   0   6    6.50    2.82
  -9   0   5    1.83    2.38
  -9   0   5    0.26    2.31
  -9   0   4  846.75   37.83
  -9   0   4  871.55   38.07
  -9   0   3   -0.73    2.25
  -9   0   3    0.92    2.33
   9   0  -2 1278.10   54.93
  -9   0   2 1321.85   55.27
  -9   0   2 1241.49   55.20
  -9   0   1    0.96    2.13
   9   0  -1   -0.41    2.16
  -9   0   1    2.42    1.94
  -9   0   1    0.23    2.42
  -9   0   0  381.01   18.28
   9   0   0  386.22   18.03
   9   0   1   -1.75    2.02
  -9   0  -1   -0.86    2.39
  -9   0  -2  367.70   17.15
   9   0   2  346.92   16.74
  -9   0  -3    0.90    4.58
   9   0   3   -0.87    4.09
   9   0   3    0.76    2.02
  -9   0  -3   -0.42    2.25
   9   0   4  277.11   19.33
  -9   0  -4  286.58   19.68
  -9   0  -4  273.51   13.59
   9   0   4  267.41   13.28
  -9   0  -5   -1.83    4.80
   9   0   5    0.89    4.34
   9   0   5    2.13    2.12
  -9   0  -5    1.30    2.31
  -9   0  -6  182.24   16.04
   9   0   6  198.56   16.17
  -9   0  -6  205.48   10.59
   9   0   6  191.21   10.25
  -9   0  -7   -1.00    4.72
   9   0   7    0.96    4.89
  -9   0  -7    1.15    2.44
   9   0   7    0.63    2.21
  -9   0  -8   -2.17    7.21
   9   0   8   -1.03    5.49
  -9   0  -8   10.04    2.88
   9   0   8    7.51    2.67
   9   0   9   -2.19    4.46
  -9   0  -9    1.31    2.87
   9   0   9   -1.15    2.41
  -9   0 -10  939.55   38.55
  -9   0 -10  984.25   49.78
   9   0  10  877.42   46.83
  -9   0 -10  861.10   37.94
  -9   0 -11   -0.31    3.93
  -9   0 -11    4.15    6.51
   9   0  11    4.65    5.35
  -9   0 -11    2.84    3.10
   9   0  11   -0.65    2.41
  -9   0 -12  726.35   35.85
  -9   0 -12  813.06   35.55
   9   0  12  830.75   34.90
  -9   0 -13   -2.71    3.22
   9   0  13    0.77    1.90
  -9   0 -14  233.45   12.41
   9   0  14  257.90   11.60
  -9   0 -15   -0.30    2.00
   9   0  15    0.43    1.21
  -9   0 -16   78.44    4.66
  -9  -1  16   13.99    1.80
  -9   1  16   11.89    1.68
  -9  -1  15  226.68   10.65
  -9   1  15  209.78   10.44
  -9  -1  14    3.10    1.96
  -9   1  14    4.45    1.89
  -9   1  14    1.30    1.41
  -9   1  13  216.47   12.04
  -9   1  13  241.00   11.97
   9   1 -12   86.97    6.72
   9  -1 -12  103.33    6.78
  -9  -1  12   91.28    7.02
  -9   1  12   97.24    6.63
  -9   1  12  101.75    6.63
  -9  -1  11   86.98   12.53
   9   1 -11  103.47    7.41
   9  -1 -11  105.07    7.35
  -9  -1  11  115.86    7.96
  -9   1  11  113.00    7.35
  -9   1  11  110.65   12.59
  -9   1  11  106.04    7.43
   9  -1 -10  360.48   27.89
   9   1 -10  444.29   30.08
  -9  -1  10  470.64   20.61
  -9   1  10  443.92   19.88
   9   1 -10  429.46   19.91
   9  -1 -10  393.70   19.58
  -9  -1  10  381.40   28.55
  -9   1  10  362.13   26.47
  -9   1  10  336.54   19.76
  -9  -1   9   90.29   12.59
  -9   1   9   92.99   11.87
  -9  -1   9  107.68    7.64
  -9   1   9  105.72    7.15
   9   1  -9  108.91    7.16
   9  -1  -9  100.73    6.98
  -9   1   9  100.93    7.60
   9   1  -8  565.14   25.76
   9  -1  -8  568.04   25.68
  -9  -1   8  582.17   26.25
  -9   1   8  564.37   25.81
  -9   1   8  506.19   25.74
  -9  -1   8  528.97   33.40
  -9   1   8  566.18   33.03
  -9   1   8  605.76   26.73
  -9  -1   7   33.35    7.61
  -9   1   7   45.92    8.00
  -9  -1   7   45.41    4.54
  -9   1   7   47.86    4.37
  -9   1   7   41.60    4.34
  -9   1   7   48.71    4.86
  -9  -1   6  204.19   11.03
  -9   1   6  198.69   10.83
  -9   1   6  211.47   11.16
  -9   1   6  199.28   11.21
  -9  -1   5  436.23   21.25
  -9   1   5  463.33   21.31
  -9   1   5  470.68   21.47
  -9   1   5  458.53   21.69
  -9  -1   4   61.40    5.01
  -9   1   4   58.05    4.83
  -9   1   4   59.87    4.86
  -9   1   4   69.13    5.31
   9   1  -3  359.46   17.51
  -9  -1   3  367.13   17.57
  -9   1   3  383.35   17.60
  -9   1   3  351.00   17.35
  -9   1   3  364.13   17.74
   9   1  -2   41.79    4.03
  -9  -1   2   34.35    3.92
  -9   1   2   37.86    3.89
  -9   1   2   25.95    3.40
  -9   1   2   34.12    3.78
  -9  -1   1  414.06   19.01
  -9   1   1  399.50   18.83
  -9   1   1  382.94   18.83
   9   1  -1  391.45   18.85
  -9   1   1  408.46   19.34
  -9   1   0   19.66    3.32
   9  -1   0   14.58    2.63
   9   1   0   16.61    3.17
  -9   1   0   17.58    2.90
  -9  -1   0   22.47    3.17
  -9   1   0   20.80    3.09
   9  -1   1  563.48   25.74
  -9   1  -1  568.35   26.48
  -9  -1  -1  609.13   26.43
  -9   1  -1  582.28   26.25
   9   1   1  579.56   26.32
  -9   1  -1  589.36   26.90
  -9   1  -2  479.55   28.60
  -9  -1  -2  489.56   28.94
   9  -1   2  465.17   21.67
  -9   1  -2  493.83   22.62
  -9  -1  -2  487.11   22.23
  -9   1  -2  490.57   22.22
   9   1   2  478.31   22.20
  -9   1  -3  509.64   28.97
  -9  -1  -3  456.90   28.46
  -9  -1  -3  494.06   22.39
  -9   1  -3  490.85   22.28
   9   1   3  469.77   22.26
   9   1   4  867.62   43.94
   9  -1   4  851.04   43.52
  -9   1  -4  818.03   43.71
  -9  -1  -4  837.08   44.01
  -9  -1  -4  862.64   37.19
  -9   1  -4  819.32   37.04
   9   1   4  855.74   37.16
  -9   1  -5    0.91    5.23
  -9  -1  -5    0.91    4.88
   9   1   5   -4.40    4.62
   9  -1   5    4.27    4.41
  -9  -1  -5    2.57    2.27
   9   1   5   -0.87    2.35
  -9  -1  -5   -0.22    2.29
  -9   1  -5    2.57    2.16
   9   1   6  477.17   28.20
   9  -1   6  460.13   27.52
  -9   1  -6  467.10   28.29
  -9  -1  -6  431.86   27.80
  -9   1  -6  464.34   21.69
  -9  -1  -6  468.08   21.29
   9   1   6  454.73   21.46
   9   1   7  368.40   24.72
   9  -1   7  379.87   24.72
  -9   1  -7  342.48   24.96
  -9  -1  -7  354.93   25.08
  -9   1  -7  388.32   18.66
  -9  -1  -7  413.50   18.44
   9   1   7  377.11   18.43
  -9   1  -8    6.52    5.90
  -9  -1  -8    2.15    5.76
   9   1   8    3.99    4.60
   9  -1   8    8.87    5.36
  -9   1  -8    8.21    3.12
  -9  -1  -8    9.73    2.91
   9   1   8    8.74    3.09
  -9   1  -9  358.25   17.37
  -9  -1  -9  347.98   17.29
  -9   1  -9  323.06   25.03
  -9  -1  -9  312.74   24.61
   9   1   9  345.46   24.09
   9  -1   9  330.63   23.64
  -9   1  -9  346.55   17.24
  -9  -1  -9  325.18   16.80
   9   1   9  346.34   16.97
  -9   1 -10    7.11    4.15
  -9  -1 -10    6.68    3.86
  -9   1 -10   -5.22    7.83
  -9  -1 -10    1.28    6.96
   9   1  10   -4.39    6.24
   9  -1  10   -1.09    5.21
  -9   1 -10    5.72    3.32
  -9  -1 -10    2.95    2.75
   9   1  10    7.24    2.95
  -9   1 -11  119.87    8.37
  -9  -1 -11  115.92    8.28
  -9   1 -11  117.99   15.00
  -9  -1 -11   96.29   13.84
  -9   1 -11  124.71    8.37
   9   1  11  116.56    7.73
  -9   1 -12    6.85    3.56
  -9  -1 -12   12.36    3.72
  -9   1 -12    5.88    3.24
   9   1  12    7.55    2.94
  -9   1 -13  287.91   14.60
  -9  -1 -13  287.04   14.53
   9   1  13  310.44   14.38
   9   1  14    2.06    1.84
  -9  -1 -14    3.03    1.96
  -9   1 -15  146.35    7.13
  -9  -1 -15  130.01    6.66
   9   1  15  139.39    6.59
  -9   1 -16  132.87    6.93
   9   1  16  137.68    6.49
   9   1  17   25.40    1.67
  -9  -2  15    0.27    1.15
  -9   2  15   -0.11    1.13
  -9  -2  14   43.49    3.37
  -9   2  14   45.68    3.47
  -9  -2  13   10.41    2.36
  -9   2  13   10.01    2.08
  -9   2  13   11.98    2.37
  -9  -2  12   77.09    5.56
  -9   2  12   61.45    4.75
  -9   2  12   73.49    4.80
  -9   2  12   71.77    5.43
   9   2 -11  212.46   10.58
   9  -2 -11  208.91   10.33
  -9  -2  11  166.54   10.50
  -9   2  11  197.08   10.19
  -9   2  11  196.45   10.33
  -9   2  11  180.47   10.86
  -9   2  10    0.77    2.25
   9   2 -10   -2.20    2.91
  -9  -2  10    2.44    2.76
  -9   2  10    0.62    2.14
   9  -2 -10   -0.23    2.62
  -9   2  10    0.31    2.82
   9   2  -9  225.81   11.82
   9  -2  -9  207.57   11.43
  -9  -2   9  231.14   12.07
  -9   2   9  234.24   11.32
  -9   2   9  185.57   11.54
  -9   2   9  221.04   12.32
  -9  -2   8   61.66    5.24
  -9   2   8   54.14    4.52
  -9   2   8   52.26    4.93
   9   2  -8   52.58    5.08
   9  -2  -8   60.99    4.92
  -9   2   8   64.04    5.48
   9  -2  -7  405.01   19.01
  -9  -2   7  426.07   19.58
  -9   2   7  390.76   18.84
  -9   2   7  395.83   19.65
  -9   2   7  396.51   19.81
   9   2  -7  424.11   19.36
   9   2  -6   30.44    3.48
  -9   2   6   26.88    3.66
  -9  -2   6   26.62    3.53
  -9   2   6   25.07    3.20
  -9   2   6   31.17    3.82
  -9  -2   5  557.51   24.61
  -9   2   5  534.27   24.21
  -9   2   5  537.40   24.82
  -9   2   5  511.43   24.88
  -9   2   4    8.00    2.57
  -9  -2   4    6.57    2.48
  -9   2   4    9.96    2.52
  -9   2   4    9.30    2.65
   9   2  -3  380.55   18.38
  -9   2   3  378.84   18.40
  -9  -2   3  391.64   18.15
  -9   2   3  381.77   17.89
  -9   2   3  377.43   18.67
  -9   2   2    3.26    2.33
  -9  -2   2   -1.25    2.26
  -9   2   2    5.14    2.00
  -9   2   2    1.90    2.41
  -9   2   1   51.01    4.52
  -9  -2   1   50.29    4.21
  -9   2   1   52.23    4.12
  -9   2   1   51.11    4.88
  -9   2   0  116.59    7.71
  -9  -2   0  140.10    7.61
  -9   2   0  121.14    7.23
  -9   2  -1  376.23   24.60
  -9  -2  -1  362.03   24.54
  -9   2  -1  414.31   19.46
  -9  -2  -1  403.42   18.74
  -9   2  -1  398.83   18.60
  -9   2  -2   10.92    5.68
  -9  -2  -2    6.92    5.73
  -9   2  -2   17.75    3.22
  -9  -2  -2   19.15    2.96
  -9   2  -2   17.63    2.62
  -9   2  -3  443.35   28.06
  -9  -2  -3  492.49   29.22
  -9   2  -3  553.03   23.76
  -9  -2  -3  499.23   22.62
  -9   2  -3  466.96   22.37
  -9   2  -4    5.94    4.61
  -9  -2  -4   14.99    5.87
  -9   2  -4    9.39    2.65
   9   2   4    6.91    2.73
   9   2   4    3.66    2.30
  -9   2  -5  305.05   21.61
  -9  -2  -5  312.93   21.88
   9   2   5  321.97   15.76
   9   2   5  319.82   15.29
  -9   2  -6   11.16    5.59
  -9  -2  -6   10.71    5.93
   9   2   6   12.30    3.07
   9   2   7  545.33   32.33
   9  -2   7  550.66   32.09
  -9   2  -7  541.52   33.48
  -9  -2  -7  573.54   34.57
   9   2   7  600.44   26.51
  -9   2  -8   61.17    5.65
  -9  -2  -8   62.19    5.78
  -9   2  -8   57.76    9.84
  -9  -2  -8   66.20   10.78
   9   2   8   56.38    8.66
   9  -2   8   65.49    8.98
   9   2   8   79.47    5.86
  -9   2  -9  593.07   27.74
  -9  -2  -9  583.30   27.90
  -9   2  -9  523.82   35.80
  -9  -2  -9  482.18   35.63
  -9   2 -10   -4.99    3.82
  -9  -2 -10   -4.41    3.82
   9   2  10   -1.32    3.00
  -9   2 -11   49.65    4.59
  -9  -2 -11   52.53    4.77
  -9   2 -12    4.01    2.49
  -9  -2 -12    2.52    2.58
  -9   2 -12   -0.74    2.97
   9   2  12    3.53    2.80
  -9   2 -13   11.33    2.59
   9   2  13   14.45    2.72
  -9   2 -14   39.36    3.38
   9   2  14   49.24    3.50
  -9  -2 -14   40.03    3.41
  -9   2 -15  105.56    5.68
  -9  -2 -15   92.47    5.51
   9   2  16   61.23    3.40
  -9   3  14   38.46    2.78
  -9   3  13  150.90    7.61
  -9   3  13  166.23    8.12
  -9   3  12   62.17    4.12
  -9   3  12   60.74    4.51
  -9   3  11   54.40    4.23
  -9   3  11   50.93    4.39
  -9   3  10   44.84    4.19
  -9   3  10   59.34    4.83
  -9   3   9    6.63    2.56
  -9   3   9    9.13    2.86
  -9   3   8  353.03   17.40
  -9   3   7  108.89    7.19
  -9   3   6  500.14   23.44
  -9   3   5   54.76    4.74
  -9   3   4  365.64   17.86
  -9   3   3   85.62    6.06
  -9   3   3   75.30    5.90
   9   3  -2   40.61    4.22
  -9   3   2   31.73    3.77
  -9   3   2   28.18    3.70
   9   3  -1  171.34    9.39
  -9   3   1  160.13    9.37
  -9   3   1  149.45    9.26
   9   3   0   56.43    4.90
  -9   3   0   47.80    4.69
   9   3   0   62.28    5.43
  -9   3   0   50.22    4.78
  -9   3  -1  114.96    7.65
   9   3   1  125.65    7.59
   9   3   1  116.27    7.84
  -9   3  -2  276.62   14.21
   9   3   2  265.69   13.71
   9   3   2  274.06   14.07
   9   3   3    2.86    1.68
  -9   3  -3    4.58    2.55
   9   3   3    2.02    2.52
  -9   3  -3    3.02    2.50
   9   3   3    0.25    2.47
   9   3   4  182.80   10.14
  -9   3  -4  217.98   11.01
   9   3   4  208.34   10.84
   9   3   4  206.86   10.94
   9   3   5   16.59    2.67
  -9   3  -5   25.15    3.56
   9   3   5   22.27    3.38
   9   3   5   22.39    3.30
   9   3   6  499.19   23.48
  -9   3  -6  553.09   24.18
   9   3   6  568.02   24.03
   9   3   6  472.19   23.32
   9   3   7   84.29    5.89
  -9   3  -7   86.14    6.31
   9   3   7   84.66    6.08
   9   3   8  307.96   15.21
  -9   3  -8  285.52   15.35
   9   3   8  321.18   15.36
   9   3   9  158.01    9.19
  -9   3  -9  145.33    9.34
   9   3   9  176.97    9.46
   9   3   9  155.06    9.53
   9   3  10  134.33    8.64
   9   3  10  148.10    8.82
   9   3  11  139.83    8.04
   9   3  12   -0.35    1.73
  -9  -3 -12   -2.12    2.13
   9   3  13   30.51    2.76
  -9  -3 -13   31.86    2.88
  -9  -3 -14   37.13    2.72
  -9   4  11  117.88    5.93
  -9   4  11  103.55    5.94
  -9   4  10   82.29    5.02
   9   4 -10   78.20    4.64
  -9   4  10   81.68    5.05
  -9   4   9  118.93    6.90
   9   4  -9  115.43    6.65
  -9   4   9  129.94    7.01
  -9   4   8    2.06    1.94
   9   4  -8    1.29    2.09
  -9   4   8    2.10    1.87
  -9   4   7   67.98    5.13
   9   4  -7   73.08    5.42
  -9   4   7   74.03    5.08
  -9   4   6  200.46   10.64
   9   4  -6  209.77   11.24
  -9   4   6  197.42   10.36
  -9   4   5   22.99    3.07
  -9   4   5   22.66    2.95
  -9   4   4  203.93   10.65
  -9   4   4  197.91   10.42
  -9   4   3   12.29    2.45
  -9   4   3   17.95    2.86
   9   4  -3   16.55    3.86
   9   4  -2  263.58   13.34
  -9   4   2  224.52   11.89
   9   4  -1    4.51    2.82
   9   4   0  481.54   22.03
   9   4   0  502.40   23.17
   9   4   1   11.42    2.45
   9   4   1   13.71    3.30
   9   4   2  492.86   21.71
  -9   4  -2  480.97   22.31
   9   4   2  462.62   22.36
   9   4   3   67.38    4.73
   9   4   3   64.44    5.17
   9   4   4   71.65    4.81
   9   4   4   59.44    4.97
   9   4   5   33.44    3.41
   9   4   5   35.82    3.71
   9   4   6   40.88    4.93
   9   4   6   41.52    3.49
   9   4   6   45.45    3.84
   9   4   6   38.05    3.80
   9   4   7   51.89    4.07
   9   4   7   59.52    4.37
   9   4   7   54.14    5.30
   9   4   8  176.94    9.26
   9   4   8  149.12    9.88
   9   4   9   34.23    3.39
   9   4   9   43.00    3.63
  -9  -4  -9   44.17    3.39
   9   4   9   36.47    3.87
   9   4  10   84.92    5.58
   9   4  10   98.22    5.67
  -9   5   6   55.19    3.61
  -9   5   5   33.76    2.75
   9   5  -5   34.04    3.10
  -9   5   4   47.40    3.31
   9   5  -4   39.64    3.80
  -9   5   3  238.27   11.25
   9   5  -2    1.45    2.80
  -9   5   2   -0.13    1.23
   9   5  -2    0.84    2.32
  -9   5   1  287.47   13.24
   9   5  -1  297.44   14.13
   9   5  -1  265.73   14.88
   9   5   0   38.71    5.19
   9   5   0   46.56    4.15
   9   5   1  158.76    8.48
   9   5   1  137.47    9.72
   9   5   2   23.39    3.00
   9   5   3  122.41    7.00
   9   5   4    6.97    2.99
   9   5   4    0.92    1.80
   9   5   5   16.17    2.99
 -10   0  15    0.45    1.30
 -10   0  14   33.45    2.91
 -10   0  13   -0.39    1.93
 -10   0  12   34.82    3.77
  10   0 -12   29.66    3.79
 -10   0  11    0.26    2.62
  10   0 -11   -0.24    2.97
 -10   0  10  184.01   10.48
  10   0 -10  181.53   10.30
 -10   0   9   -0.27    2.33
  10   0  -9    1.87    2.82
 -10   0   9    3.18    2.80
  10   0  -8  874.67   36.81
 -10   0   8  948.70   37.42
 -10   0   7    1.51    2.63
 -10   0   7    0.50    2.59
 -10   0   6  885.41   40.32
 -10   0   6  958.59   41.13
 -10   0   5   -0.57    2.49
 -10   0   5    0.72    2.44
 -10   0   4  203.23   10.97
 -10   0   4  198.12   11.11
 -10   0   3   -2.67    2.22
 -10   0   3    1.48    2.46
 -10   0   2   28.97    3.75
  10   0  -1    0.44    2.46
 -10   0   1    1.94    2.40
  10   0   0    4.71    2.42
 -10   0   0    6.99    2.80
  10   0   1   -1.26    2.27
 -10   0  -1    0.95    2.38
 -10   0  -2   76.43   10.45
  10   0   2   69.24    5.16
 -10   0  -2   74.76    5.48
 -10   0  -3    0.99    4.93
  10   0   3   -0.20    2.24
 -10   0  -3    0.46    2.44
 -10   0  -4  175.00   16.16
 -10   0  -4  204.27   10.78
  10   0   4  199.08   10.42
 -10   0  -5   -1.95    4.94
 -10   0  -5   -0.23    2.50
  10   0   5    2.06    2.24
  10   0   6  713.07   40.23
 -10   0  -6  705.55   40.56
 -10   0  -6  742.85   33.50
  10   0   6  784.31   33.39
 -10   0  -7   -5.13    5.48
  10   0   7   -4.90    5.94
 -10   0  -7    0.24    2.31
  10   0   7    4.51    2.51
  10   0   8  705.54   39.64
 -10   0  -8  664.34   39.76
 -10   0  -8  725.97   32.04
  10   0   8  712.11   31.69
 -10   0  -9   -0.26    3.26
 -10   0  -9    3.43    5.59
 -10   0  -9   -0.25    2.77
  10   0   9    1.49    2.39
 -10   0 -10  197.22   11.00
 -10   0 -10  193.72   10.66
  10   0  10  175.35    9.80
 -10   0 -11   -1.33    3.62
 -10   0 -11    2.79    2.59
  10   0  11    0.84    2.03
 -10   0 -12    8.78    3.12
  10   0  12   11.95    2.03
 -10   0 -13    1.27    2.40
  10   0  13   -0.10    1.34
 -10   0 -14   42.98    3.53
 -10   0 -15    1.30    1.43
 -10  -1  15   -0.87    1.35
 -10   1  15   -1.39    1.40
 -10  -1  14  317.44   14.28
 -10   1  14  303.25   14.11
 -10  -1  13    1.44    1.95
 -10   1  13   -0.16    1.83
 -10   1  13    3.86    1.46
  10   1 -12  189.82    9.46
  10  -1 -12  179.33    9.41
 -10  -1  12  184.32    9.73
 -10   1  12  151.96    9.08
 -10   1  12  169.83    9.06
 -10  -1  11   15.83    3.19
 -10   1  11   21.64    2.99
  10   1 -11   17.50    3.32
  10  -1 -11   14.38    3.15
 -10   1  11   15.33    2.90
  10   1 -10    9.32    3.35
  10  -1 -10   10.56    3.18
 -10  -1  10   11.96    3.43
 -10   1  10   15.27    2.97
 -10   1  10    9.70    3.03
 -10  -1   9  304.71   15.14
 -10   1   9  305.98   14.73
  10   1  -9  305.80   14.68
  10  -1  -9  285.45   14.50
  10   1  -8    4.54    2.73
 -10  -1   8    3.22    2.91
 -10   1   8    5.03    2.61
  10  -1  -8    4.46    2.63
 -10   1   8   -0.31    2.81
  10   1  -7  440.80   20.52
  10  -1  -7  426.74   20.41
 -10  -1   7  446.89   20.97
 -10   1   7  422.75   20.52
 -10   1   7  461.04   21.42
 -10   1   6    2.09    2.20
 -10  -1   6   -0.25    2.58
 -10   1   6    0.93    2.40
 -10   1   6    1.16    2.46
 -10  -1   5  393.22   19.13
 -10   1   5  406.07   19.08
 -10   1   5  389.65   19.24
 -10   1   5  416.69   19.64
 -10   1   4    4.54    2.29
 -10  -1   4    2.15    2.33
 -10   1   4    8.13    2.75
 -10   1   4    6.01    2.62
 -10  -1   3  207.29   10.63
 -10   1   3  186.25   10.28
 -10   1   3  180.04   10.30
 -10   1   3  185.25   10.63
  10   1  -2  635.28   28.22
 -10  -1   2  632.75   28.11
 -10   1   2  618.44   27.97
 -10   1   2  616.63   28.04
 -10   1   2  583.94   28.22
 -10   1   1    3.82    2.49
  10   1  -1    5.07    2.78
 -10   1   1    3.87    2.16
 -10  -1   1    4.49    2.53
 -10   1   1    4.83    2.49
  10   1   0  573.46   25.37
 -10   1   0  514.09   25.08
 -10  -1   0  557.14   25.27
 -10   1   0  554.99   25.18
 -10   1  -1  109.22   12.76
 -10  -1  -1  129.70   13.80
 -10   1  -1  113.34    7.54
  10   1   1  122.22    7.61
 -10  -1  -1  124.72    7.72
 -10   1  -1  137.50    7.78
 -10   1  -2  173.86   16.41
 -10  -1  -2  182.94   17.10
  10  -1   2  209.72   10.78
 -10  -1  -2  221.03   11.41
 -10   1  -2  210.40   11.22
  10   1   2  220.88   11.31
 -10   1  -3  323.43   22.38
 -10  -1  -3  306.45   22.65
 -10  -1  -3  338.77   16.21
 -10   1  -3  328.00   16.06
  10   1   3  328.09   16.04
 -10   1  -4   12.30    6.42
 -10  -1  -4    2.90    5.80
 -10  -1  -4    2.02    2.22
  10   1   4    5.38    2.67
 -10  -1  -4    7.08    2.65
 -10   1  -4    2.00    2.35
 -10   1  -5  499.77   30.87
 -10  -1  -5  487.56   31.09
 -10   1  -5  520.46   24.35
 -10  -1  -5  534.24   23.98
  10   1   5  541.43   24.25
 -10   1  -6   34.19    7.82
 -10  -1  -6   19.93    6.45
 -10   1  -6   26.27    3.85
 -10  -1  -6   27.06    3.46
  10   1   6   37.99    3.98
  10   1   7  280.74   21.07
  10  -1   7  290.65   21.13
 -10   1  -7  257.17   21.06
 -10  -1  -7  263.50   21.43
 -10   1  -7  298.90   15.15
 -10  -1  -7  321.96   15.01
  10   1   7  313.36   15.16
 -10   1  -8   36.52    8.43
 -10  -1  -8   45.66    8.91
 -10   1  -8   45.84    4.50
 -10  -1  -8   39.94    4.36
  10   1   8   45.96    4.66
 -10   1  -9  240.46   13.42
 -10  -1  -9  274.93   13.73
 -10   1  -9  269.60   13.59
 -10  -1  -9  237.86   13.02
  10   1   9  264.21   13.34
 -10   1 -10   43.16    4.94
 -10  -1 -10   41.20    4.90
 -10   1 -10   43.56    4.80
  10   1  10   38.35    4.22
 -10   1 -11   91.51    6.34
 -10  -1 -11   82.01    6.22
 -10   1 -11   77.86    6.20
  10   1  11   77.75    5.67
 -10   1 -12  181.29    9.93
 -10  -1 -12  191.47   10.04
 -10   1 -12  180.84    9.96
  10   1  12  190.09    9.63
 -10   1 -13   -0.16    2.18
 -10  -1 -13    3.16    2.22
  10   1  13   -0.91    1.72
 -10  -1 -14  152.19    7.27
 -10   1 -14  159.15    7.56
  10   1  14  155.47    7.10
 -10   1 -15   58.81    3.71
  10   1  15   60.93    3.22
 -10  -2  13  287.97   12.64
 -10   2  13  261.11   12.67
 -10  -2  12   66.65    4.54
 -10   2  12   60.32    4.46
 -10  -2  11  162.37    8.72
 -10   2  11  148.86    8.08
 -10   2  11  154.17    8.70
  10   2 -10   68.13    4.93
  10  -2 -10   64.00    4.67
 -10  -2  10   49.66    4.89
 -10   2  10   61.29    4.51
 -10   2  10   64.25    4.47
 -10   2  10   54.74    5.02
 -10   2   9   15.80    2.82
 -10  -2   9   21.25    3.56
 -10   2   9   19.10    2.77
  10   2  -9   24.37    3.33
  10  -2  -9   24.38    3.21
 -10   2   9   18.63    3.38
  10   2  -8    8.27    3.00
  10  -2  -8    2.68    2.50
 -10   2   8    3.02    2.24
 -10  -2   8    5.28    2.71
 -10   2   8    3.12    2.22
 -10   2   8    1.14    2.60
 -10   2   7    2.62    2.41
 -10  -2   7   -1.71    2.46
 -10   2   7    1.93    2.08
  10   2  -7    0.89    2.57
  10  -2  -7    2.79    2.44
 -10   2   7    3.67    2.62
  10   2  -6    2.99    2.57
 -10   2   6    3.40    2.17
  10  -2  -6    5.01    2.36
 -10  -2   6    0.47    2.39
 -10   2   6    4.43    2.19
 -10   2   6    3.03    2.55
 -10   2   5  207.62   11.15
 -10  -2   5  226.02   11.14
 -10   2   5  192.84   10.42
 -10   2   5  200.24   11.31
 -10   2   4   10.76    2.60
 -10  -2   4   12.14    2.80
 -10   2   4    8.59    2.33
 -10   2   4   11.48    2.94
 -10   2   3  321.77   16.67
 -10  -2   3  366.68   16.63
 -10   2   3  345.75   16.23
 -10   2   3  338.89   17.02
 -10   2   2   22.18    3.56
 -10  -2   2   29.77    3.35
 -10   2   2   28.49    3.05
 -10   2   2   22.52    3.21
 -10   2   1  327.98   23.85
 -10  -2   1  322.39   24.29
 -10   2   1  395.11   18.81
 -10  -2   1  417.17   18.51
 -10   2   1  391.50   18.21
 -10   2   1  394.25   19.16
 -10   2   0    5.89    2.72
 -10   2   0   -9.44    8.15
 -10  -2   0   -4.44    7.38
 -10   2   0    1.28    2.17
 -10  -2   0    6.68    2.11
 -10   2   0    6.88    2.09
 -10   2  -1  762.71   42.24
 -10  -2  -1  768.51   42.86
 -10   2  -1  802.37   36.46
 -10  -2  -1  864.02   36.06
 -10   2  -1  811.42   35.79
 -10   2  -2   83.15   10.92
 -10  -2  -2   90.19   11.61
 -10   2  -2  110.42    7.39
  10   2   2  117.01    7.28
 -10  -2  -2  122.68    7.05
 -10   2  -2  112.46    6.71
 -10   2  -3  289.05   21.29
 -10  -2  -3  336.09   22.62
  10   2   3  348.92   16.45
  10   2   3  334.20   16.18
 -10   2  -4  134.10   13.04
 -10  -2  -4  140.28   13.65
  10   2   4  148.20    8.51
  10   2   4  141.68    8.07
 -10   2  -5   92.58   10.90
 -10  -2  -5   85.98   10.81
  10   2   5   99.97    6.60
 -10   2  -6   41.30    7.85
  10   2   6   45.15    4.44
 -10   2  -7   38.31    4.58
 -10  -2  -7   40.73    4.79
  10   2   7   45.96    4.44
 -10   2  -8    1.42    3.13
 -10  -2  -8    0.49    3.19
  10   2   8    0.96    2.77
 -10   2  -9  173.67   10.27
 -10  -2  -9  179.53   10.45
 -10   2 -10   60.60    4.84
 -10  -2 -10   65.46    5.10
 -10   2 -10   59.42    5.36
  10   2  10   53.51    4.95
 -10   2 -11  346.02   15.87
 -10  -2 -11  364.22   16.02
 -10   2 -11  341.60   16.57
  10   2  11  310.10   16.11
 -10   2 -12   44.25    3.72
  10   2  12   44.05    3.74
 -10   2 -13  210.45    9.95
  10   2  13  215.05   10.03
 -10  -2 -13  199.61   10.04
  10   2  14   10.17    1.59
  10   2  15  220.11    9.67
 -10   3  12  122.27    6.42
 -10   3  11   50.21    3.35
  10   3 -11   45.34    3.55
 -10   3  10  176.10    8.62
 -10   3  10  154.70    8.84
 -10   3   9   47.23    4.06
 -10   3   9   61.08    4.69
 -10   3   8   74.82    5.64
 -10   3   8  100.91    6.24
 -10   3   7  110.06    7.11
 -10   3   7  121.97    7.37
 -10   3   6   34.21    3.80
 -10   3   5   79.09    5.67
 -10   3   4  254.52   13.04
 -10   3   3   26.92    3.33
 -10   3   2  393.87   18.68
 -10   3   2  386.83   18.76
 -10   3   1   28.68    3.70
  10   3  -1   32.13    3.78
 -10   3   1   36.81    3.83
  10   3  -1   33.22    4.33
  10   3   0  190.42   10.06
 -10   3   0  184.45   10.14
  10   3   0  170.63   10.18
  10   3   1   38.80    4.10
 -10   3  -1   34.94    3.85
  10   3   1   34.69    4.12
 -10   3  -2  340.58   16.73
  10   3   2  363.89   16.95
 -10   3  -2  359.00   17.30
  10   3   2  347.24   16.97
 -10   3  -3  222.60   11.44
  10   3   3  230.55   11.55
  10   3   3  211.77   11.43
 -10   3  -4  299.52   14.53
  10   3   4  307.29   14.52
  10   3   4  277.87   14.24
 -10   3  -5   98.37    6.59
  10   3   5   99.99    6.48
 -10   3  -6   42.76    4.36
  10   3   6   46.57    4.30
 -10   3  -7   44.66    4.42
 -10   3  -8  149.39    8.79
 -10   3  -9   55.51    4.70
  10   3   9   48.67    4.31
 -10   3 -10  234.91   11.68
 -10  -3 -11   44.79    3.59
 -10  -3 -12  132.97    6.80
 -10   4   9    1.50    1.22
 -10   4   8   98.99    5.79
  10   4  -8  110.39    5.86
 -10   4   8  102.08    5.85
 -10   4   7   -0.16    1.51
 -10   4   7   -0.17    1.54
  10   4  -7   -0.50    1.86
 -10   4   6  193.75    9.70
 -10   4   6  184.12    9.49
 -10   4   5    0.49    1.61
 -10   4   5    1.83    1.65
 -10   4   4  331.18   14.79
  10   4  -4  279.62   15.14
 -10   4   3   31.52    3.19
  10   4  -3   34.51    4.02
 -10   4   2   64.28    4.60
  10   4  -2   67.41    5.37
 -10   4   1  135.52    7.65
  10   4  -1  138.31    8.19
  10   4   0    9.55    2.65
  10   4   1   46.71    4.21
  10   4   2  217.27   11.07
  10   4   3   15.39    2.56
  10   4   4  168.87    8.86
  10   4   5    0.26    2.56
  10   4   6  150.49    8.80
  10   4   7    1.01    2.25
 -11   0  14  218.25   10.01
 -11   0  13    0.65    1.44
 -11   0  12  599.47   26.48
  11   0 -11    2.19    2.38
 -11   0  11   -0.82    2.26
  11   0 -10  275.59   13.86
 -11   0  10  282.84   14.05
  11   0  -9    2.10    2.72
 -11   0   9    2.85    2.56
  11   0  -8   15.28    3.16
 -11   0   8   13.66    2.97
 -11   0   7    1.91    2.48
  11   0  -7   -1.04    2.55
 -11   0   6   62.03    5.12
 -11   0   5   -1.61    2.56
 -11   0   4   45.65    4.33
 -11   0   3   -1.38    2.65
 -11   0   2  319.55   15.73
 -11   0   1    0.47    2.48
 -11   0   0 1205.92   62.19
 -11   0   0 1261.72   54.08
 -11   0  -1   -4.08    6.56
  11   0   1   -1.22    2.14
 -11   0  -1    1.42    2.66
 -11   0  -2  998.30   51.12
  11   0   2  966.29   42.73
 -11   0  -2 1009.29   43.24
  11   0   3   -1.00    2.26
 -11   0  -3   -2.53    2.75
 -11   0  -4   65.31    9.45
 -11   0  -4   71.30    5.17
  11   0   4   52.39    4.54
 -11   0  -5    0.97    4.26
  11   0   5    0.60    2.18
 -11   0  -5   -0.89    2.32
 -11   0  -6   45.87    4.32
  11   0   6   41.07    4.07
 -11   0  -7   -1.13    2.41
  11   0   7    0.40    2.34
 -11   0  -8   79.45    5.95
 -11   0  -8   74.64    5.57
  11   0   8   61.34    4.94
 -11   0  -9    0.48    3.04
 -11   0  -9   -1.84    2.57
  11   0   9    1.16    2.03
 -11   0 -10  113.45    7.95
 -11   0 -10  127.82    7.83
 -11   0 -11    2.61    2.62
  11   0  11   -0.29    1.37
 -11   0 -12  122.51    6.92
 -11  -1  13  141.43    6.98
 -11   1  13  133.63    6.80
 -11  -1  12    9.05    1.98
 -11   1  12    8.16    1.76
  11   1 -11   69.05    4.89
  11  -1 -11   67.98    4.86
 -11  -1  11   80.74    5.21
 -11   1  11   69.74    4.69
 -11   1  11   68.36    4.46
 -11   1  10    5.53    2.08
 -11  -1  10    4.38    2.43
 -11   1  10    8.74    2.47
  11   1 -10    4.09    2.52
  11  -1 -10    6.17    2.55
 -11  -1   9   53.37    4.86
 -11   1   9   46.89    4.23
  11   1  -9   49.24    4.43
  11  -1  -9   50.16    4.41
 -11   1   9   38.71    4.18
 -11  -1   8   44.37    4.20
 -11   1   8   47.71    4.00
  11   1  -8   37.93    3.93
  11  -1  -8   37.50    3.93
 -11   1   7   11.36    3.14
  11  -1  -7   10.70    2.81
 -11  -1   7   14.31    3.06
 -11   1   7   11.34    2.78
  11   1  -7   11.51    2.92
  11   1  -6  377.11   18.05
  11  -1  -6  374.28   17.97
 -11  -1   6  400.58   18.46
 -11   1   6  378.97   18.10
 -11   1   6  385.64   18.81
 -11   1   5    5.79    2.63
 -11  -1   5   12.09    2.74
 -11   1   5    9.22    2.44
 -11  -1   4  185.82    9.85
 -11   1   4  170.79    9.58
 -11   1   4  176.34   10.16
 -11  -1   3  322.03   15.36
 -11   1   3  331.38   15.32
 -11   1   3  282.27   15.36
 -11  -1   2    1.33    2.14
 -11   1   2    2.17    2.21
 -11   1   1  274.04   21.67
 -11  -1   1  287.13   22.19
  11   1  -1  332.68   15.72
 -11  -1   1  326.71   15.59
 -11   1   1  309.82   15.41
  11   1   0    7.96    2.93
 -11  -1   0    8.56    2.44
 -11   1   0    5.28    2.40
 -11   1  -1  268.45   20.68
 -11  -1  -1  285.36   21.27
  11   1   1  299.86   14.81
 -11  -1  -1  309.49   14.87
 -11   1  -1  296.86   14.71
 -11   1  -2   11.28    5.68
 -11  -1  -2    7.69    5.66
  11   1   2   22.70    3.40
 -11  -1  -2   17.58    3.15
 -11   1  -2   22.02    3.13
 -11   1  -3  229.23   18.66
 -11  -1  -3  240.84   19.10
 -11  -1  -3  252.48   12.71
  11   1   3  258.37   13.07
 -11  -1  -3  269.32   13.24
 -11   1  -3  269.64   13.12
 -11   1  -4   13.98    5.67
 -11  -1  -4   12.45    5.45
 -11   1  -4   11.92    2.90
 -11  -1  -4   10.86    2.47
  11   1   4   11.25    2.94
 -11   1  -5  174.47   10.09
 -11  -1  -5  189.37    9.87
  11   1   5  199.25   10.23
 -11   1  -6  107.91    7.00
 -11  -1  -6  102.65    6.69
  11   1   6  117.24    7.17
 -11   1  -7    1.39    2.47
  11   1   7    1.10    2.48
 -11   1  -8  315.13   15.16
 -11  -1  -8  310.74   15.18
 -11   1  -8  293.62   14.99
  11   1   8  292.69   14.82
 -11   1  -9   48.94    4.98
 -11  -1  -9   53.90    5.12
 -11   1  -9   54.11    4.80
  11   1   9   45.65    4.32
 -11   1 -10  162.24    9.27
 -11  -1 -10  165.38    9.36
 -11   1 -10  166.02    9.27
  11   1  10  161.88    8.70
 -11   1 -11  192.87   10.53
 -11  -1 -11  208.53   10.67
 -11   1 -11  197.64   10.62
 -11   1 -12   -0.93    2.12
 -11  -1 -12   -0.54    2.09
  11   1  12    3.40    1.38
  11   1  13  163.56    7.47
 -11  -2  11   97.68    5.48
 -11   2  11  101.65    5.72
 -11   2  10   -0.91    1.77
 -11  -2  10   -1.38    1.99
  11  -2  -9  319.64   14.16
 -11  -2   9  280.98   14.41
 -11   2   9  312.30   14.05
 -11   2   9  289.00   14.74
 -11   2   8    3.87    2.42
 -11  -2   8   12.40    2.38
 -11   2   8   10.46    1.94
  11  -2  -8    3.33    2.37
 -11  -2   7  594.10   24.48
 -11   2   7  558.85   23.79
  11   2  -7  610.27   24.36
  11  -2  -7  542.37   23.86
 -11   2   7  556.44   24.82
 -11   2   6   14.89    3.09
 -11   2   6   11.50    2.57
 -11  -2   6   10.57    2.77
 -11   2   6   11.93    2.18
  11   2  -6   13.07    2.82
  11  -2  -6   12.49    2.59
  11   2  -5  290.22   13.61
  11  -2  -5  278.50   13.35
 -11   2   5  253.87   13.80
 -11  -2   5  302.15   13.89
 -11   2   5  276.34   13.27
 -11   2   5  274.94   14.20
 -11   2   4    0.25    2.21
 -11   2   4    1.17    2.06
 -11  -2   4   -0.99    2.16
 -11   2   4    3.15    1.80
 -11   2   3  296.50   14.27
 -11  -2   3  298.56   13.88
 -11   2   3  270.13   13.41
 -11   2   3  272.81   14.21
 -11  -2   2   86.57    5.46
 -11   2   2   84.13    5.16
  11   2  -1   20.23    3.45
 -11   2   1   20.81    3.06
 -11   2   1   29.31    2.85
 -11  -2   1   24.25    2.95
  11   2   0  122.01    7.42
 -11   2   0  117.85    7.24
 -11  -2   0  121.19    6.95
 -11   2   0  110.59    6.63
  11   2   1   14.63    3.10
 -11   2  -1   23.62    2.62
 -11  -2  -1   17.46    2.73
  11   2   1   13.15    2.81
  11   2   2   50.60    4.52
  11   2   2   47.85    4.16
  11   2   3  342.83   16.53
  11   2   4    6.50    2.64
  11   2   5  460.63   21.31
 -11   2  -6   56.38    4.85
 -11  -2  -6   60.37    5.02
  11   2   6   59.22    4.94
 -11   2  -7  567.35   26.20
 -11  -2  -7  575.93   26.31
  11   2   7  612.90   26.49
 -11   2  -8   44.87    4.22
 -11  -2  -8   39.36    4.22
 -11   2  -8   44.06    4.52
  11   2   8   51.90    4.42
 -11   2  -9  187.68    9.84
 -11  -2  -9  205.88    9.99
 -11   2  -9  201.09   10.50
  11   2   9  175.67    9.95
 -11  -2 -10   12.26    2.27
 -11   2 -10   11.93    2.58
  11   2  10    7.47    2.37
 -11   2 -11  108.45    5.99
  11   2  11  118.58    6.23
  11   2  12   31.20    2.49
  11   2  13    3.73    0.94
 -11   3  10  145.52    7.38
 -11   3   9    2.49    1.60
  11   3  -9    4.42    1.73
 -11   3   8  282.25   13.37
 -11   3   8  297.91   13.92
 -11   3   7    1.76    1.79
 -11   3   7    1.01    1.63
 -11   3   6  213.99   11.43
  11   3  -6  227.41   12.14
 -11   3   6  253.78   11.85
 -11   3   5    5.30    2.09
  11   3  -5    2.59    2.75
 -11   3   4  118.45    6.94
  11   3  -4  112.64    7.61
 -11   3   3   63.64    4.78
  11   3  -3   67.39    5.48
 -11   3   2   47.49    4.14
  11   3  -2   56.28    4.78
 -11   3   1  223.36   11.15
  11   3  -1  210.83   11.31
 -11   3   0   22.73    2.76
 -11   3   0   23.56    3.01
  11   3   0   23.86    3.26
 -11   3  -1  112.83    6.32
  11   3   1  109.03    6.43
  11   3   1   97.13    6.44
  11   3   2    5.80    2.24
 -11   3  -2    4.13    2.06
  11   3   2    3.54    2.03
  11   3   3    6.66    2.44
 -11   3  -3    8.81    2.33
  11   3   3    4.36    1.97
 -11   3  -4  418.99   19.21
  11   3   4  418.37   19.23
 -11   3  -5   10.29    2.51
 -11   3  -6  576.00   25.77
 -11   3  -7   -1.48    2.31
 -11   3  -8  164.59    8.72
 -11   3  -9    2.41    1.70
 -11   4   5   36.66    2.97
  11   4  -5   37.75    3.33
 -11   4   4   64.77    3.93
  11   4  -4   43.00    3.96
 -11   4   3   28.08    2.60
  11   4  -3   24.86    3.12
  11   4  -2  296.00   14.11
  11   4  -1   29.47    3.14
  11   4   0  203.53   10.12
  11   4   1    7.95    1.91
  11   4   3   34.58    3.95
  11   4   4   42.18    3.92
 -12   0  11   -0.88    1.46
  12   0 -10  141.65    7.33
 -12   0  10  127.20    7.23
  12   0  -9   -4.10    2.50
 -12   0   9   -0.18    1.91
 -12   0   8  234.36   12.04
  12   0  -8  252.51   12.13
  12   0  -7    1.45    2.33
 -12   0   7    0.39    2.11
  12   0  -6  281.44   13.96
 -12   0   6  299.37   14.14
 -12   0   5   -1.36    2.14
 -12   0   4  500.74   22.74
 -12   0   3   -1.75    2.21
 -12   0   2  303.87   14.69
 -12   0   1    1.40    2.18
 -12   0   0   13.15    2.70
 -12   0  -1    4.26    2.29
 -12   0  -2  227.19   11.57
 -12   0  -3   -2.88    2.16
 -12   0  -4  382.29   17.72
  12   0   4  375.77   17.45
  12   0   5   -0.17    2.09
 -12   0  -5   -0.76    2.16
 -12   0  -6  640.65   26.23
  12   0   6  541.21   25.54
 -12   0  -7   -0.83    2.68
  12   0   7    0.56    1.89
 -12   0  -7   -0.19    2.21
 -12   0  -8  150.71    9.05
  12   0   8  172.58    8.36
 -12   0  -9   -0.19    2.58
 -12   0  -9   -0.74    1.83
 -12   0 -10  211.39   10.56
 -12   0 -11    0.73    1.63
  12   1 -10  111.53    5.88
  12  -1 -10  117.23    5.91
 -12  -1  10  103.79    6.00
  12   1  -9   60.29    4.32
  12  -1  -9   62.33    4.32
 -12  -1   9   48.39    4.24
 -12   1   9   57.49    4.12
  12   1  -8   48.41    4.14
  12  -1  -8   53.02    4.18
 -12  -1   8   44.82    4.15
 -12   1   8   55.89    4.03
 -12  -1   7  153.28    8.54
 -12   1   7  151.77    8.26
  12   1  -7  156.00    8.40
  12  -1  -7  162.20    8.41
  12   1  -6    3.10    2.26
  12  -1  -6   -0.34    2.20
 -12  -1   6   -1.96    2.18
 -12   1   6    0.18    1.96
  12   1  -5  198.85   10.33
  12  -1  -5  203.41   10.37
 -12  -1   5  212.72   10.62
 -12   1   5  205.77   10.39
 -12  -1   4   52.33    4.16
 -12   1   4   49.76    4.02
 -12  -1   3  183.17    9.54
 -12   1   3  178.62    9.36
 -12  -1   2  174.97    9.33
 -12   1   2  177.67    9.23
 -12  -1   1   39.54    3.72
 -12   1   1   37.59    3.47
 -12  -1   0   14.90    2.62
 -12   1   0   14.30    2.54
 -12  -1  -1    4.13    1.93
 -12  -1  -1    6.03    2.23
 -12   1  -1    7.33    2.23
 -12  -1  -2   60.07    4.48
  12   1   2   80.67    5.14
  12   1   3   26.22    3.26
 -12   1  -3   21.72    3.11
 -12   1  -4  156.03    8.47
  12   1   4  146.32    8.32
 -12   1  -5  151.37    8.33
  12   1   5  145.38    8.19
 -12   1  -6   74.52    5.26
  12   1   6   74.32    5.21
 -12   1  -7  299.52   14.21
 -12  -1  -7  308.24   14.35
 -12   1  -7  300.69   14.23
  12   1   7  263.90   13.77
 -12   1  -8    5.66    2.69
 -12  -1  -8    7.81    2.62
  12   1   8    5.14    2.18
 -12   1  -8    3.90    2.49
 -12   1  -9  221.04   11.38
 -12  -1  -9  216.42   11.37
 -12   1  -9  236.71   11.54
  12   1   9  243.39   10.97
 -12   1 -10   90.99    5.63
 -12  -1 -10   96.78    5.71
 -12   1 -10   98.37    5.75
  12   1  10  108.82    5.27
  12   1  11   24.79    1.79
  12  -2  -8   28.23    2.44
  12  -2  -7   26.90    2.64
 -12  -2   7   21.93    2.66
  12  -2  -6   68.51    4.40
 -12  -2   6   67.84    4.74
 -12  -2   5   54.35    4.18
 -12   2   5   49.72    3.58
  12  -2  -5   55.62    3.80
  12  -2  -4   17.11    2.35
 -12  -2   4   16.82    2.56
 -12   2   4   14.13    2.04
  12  -2  -3  149.62    7.33
 -12  -2   3  142.90    7.63
 -12   2   3  129.00    7.13
 -12  -2   2   26.12    2.77
 -12   2   2   21.89    2.29
 -12  -2   1  477.08   20.93
  12   2  -1  453.79   21.15
  12   2   0    3.48    1.98
  12   2   2   37.47    3.65
  12   2   3  313.94   14.92
  12   2   4    6.38    2.27
 -12   2  -5   62.33    4.70
 -12  -2  -5   66.58    4.83
  12   2   5   77.24    4.98
 -12   2  -6   46.66    3.84
  12   2   6   42.94    3.71
 -12  -2  -7    3.44    2.04
  12   2   7    4.91    2.28
 -12   2  -7    3.78    2.15
  12   2   8   17.42    2.60
 -12   2  -8   19.02    2.68
  12   2   9    8.26    1.95
 -12   2  -9   10.79    1.99
  12   2  10    2.16    1.27
  12   2  11   78.12    3.81
  12   3  -6    5.24    1.88
  12   3  -5   27.13    3.05
 -12   3   4   10.43    1.68
  12   3  -4    4.16    2.18
 -12   3   3   16.51    2.08
  12   3  -3   15.01    2.58
 -12   3   2  129.58    6.58
  12   3  -2  121.34    7.02
 -12   3   1    6.70    1.68
  12   3  -1    3.82    1.88
 -12   3   0  452.87   19.04
  12   3   0  404.70   19.05
 -12   3  -1   19.28    2.28
 -12   3  -2  349.38   15.78
 -12   3  -3   17.92    2.33
 -12   3  -4   22.08    2.47
 -12   3  -5   39.72    3.24
  13   0  -9   -1.10    1.46
  13   0  -8  131.43    6.60
 -13   0   8  119.55    6.53
  13   0  -7   -0.26    1.80
 -13   0   7   -0.41    1.52
  13   0  -6    0.27    1.85
 -13   0   6    1.15    1.68
  13   0  -5   -0.96    1.80
 -13   0   5   -0.15    1.55
  13   0  -4   22.72    2.68
 -13   0   4   20.30    2.47
 -13   0   3    1.04    1.63
 -13   0   2  260.63   12.35
 -13   0   1    7.09    1.49
 -13   0   0  262.93   12.47
 -13   0   0  268.03   12.55
 -13   0  -1    1.79    1.64
 -13   0  -2  333.87   15.25
 -13   0  -3    1.07    1.70
 -13   0  -4  178.07    8.84
 -13   0  -5   -0.26    1.62
 -13   0  -6   96.19    5.79
 -13   0  -7   -0.15    2.07
 -13   0  -8    1.80    1.84
  13   1  -8   64.41    3.94
  13  -1  -8   76.38    4.05
  13   1  -7   45.11    3.27
  13  -1  -7   43.67    3.21
 -13  -1   7   46.19    3.41
 -13   1   7   42.52    3.10
  13   1  -6  119.55    6.46
 -13  -1   6  126.52    6.74
 -13   1   6  119.19    6.45
  13  -1  -6  129.33    6.52
  13   1  -5    2.21    1.77
 -13  -1   5    4.03    1.77
 -13   1   5    1.65    1.43
  13  -1  -5    3.03    1.82
 -13  -1   4   20.94    2.56
 -13   1   4   18.98    2.30
  13   1  -4   18.11    2.39
  13  -1  -4   21.02    2.45
  13   1  -3  119.02    6.40
  13  -1  -3  129.57    6.47
 -13  -1   3  117.42    6.57
 -13   1   3  116.01    6.39
 -13  -1   2   69.27    4.35
 -13   1   2   62.80    4.15
 -13  -1   1  107.39    5.77
 -13   1   1   94.33    5.53
 -13   1   0   67.44    4.41
 -13   1  -1  156.52    8.06
 -13   1  -2    7.26    1.97
 -13   1  -3  119.76    6.57
 -13   1  -4  130.75    7.02
 -13   1  -5  123.51    6.68
 -13  -1  -5  116.45    6.63
 -13   1  -5  118.83    6.57
 -13   1  -6  158.64    8.27
 -13  -1  -6  159.60    8.32
 -13   1  -6  164.68    8.29
  13  -2  -5  140.32    6.58
  13  -2  -4    0.97    1.39
  13  -2  -3  307.83   13.60
  13  -2  -2   17.78    1.97
  13  -2  -1   96.38    5.04
  13  -2   0    3.43    1.46
  14   0  -6  185.99    8.33
  14   0  -5   -0.53    1.17
  14   0  -4  241.33   10.85
  14   0  -3   -0.09    1.34
  14   0  -2   50.13    3.15
  14   0  -1    1.68    1.29
  14   1  -4    2.16    1.10
  14  -1  -4    2.91    1.14
  14   1  -3  111.77    5.73
  14  -1  -3  131.56    5.87
  14   1  -2   40.61    2.67
  14  -1  -2   46.22    2.76
  14  -1  -1  102.51    5.01
  14   1  -1   96.84    4.94
  14   1   0  187.38    8.70
  14  -1   0  195.24    8.76
  14   1   1    8.70    1.30
  14  -1   1   10.33    1.37
   0   0   0    0.00    0.00


TITL TH_AK-PM1-AN2zu1_autored in P2(1)/c
REM P2(1)/c (#14 in standard setting)
CELL 1.54184  11.406107   5.746454  18.412398  90.0000  90.4787  90.0000
ZERR    4.00   0.000255   0.000140   0.000444   0.0000   0.0019   0.0000
LATT  1
SYMM -x, y+1/2,-z+1/2
SFAC C H N O F S I
UNIT 40.00 36.00 4.00 8.00 8.00 4.00 4.00
REM  CrysAlisPro recorded range (K): Min=100.0; max=100.1; aver:100.0
TEMP -173
SIZE 0.05 0.07 0.12
TREF
HKLF 4
END
_computing_structure_solution     'SHELXT 2014/5 (Sheldrick, 2014)'
;
_shelx_hkl_checksum                24589
_olex2_submission_special_instructions  'No special instructions were received'
_oxdiff_exptl_absorpt_empirical_details
;
Empirical correction (ABSPACK) includes:
- Absorption correction using spherical harmonics
- Frame scaling
;
