# Supplementary material for: Halogen Bonding in Sulphonamide Co-Crystals: X···π Preferred over X···O/N?
Source: Molecules. 2023 Aug 6;28(15):5910. doi: 10.3390/molecules28155910 (PMC10420850; doi:10.3390/molecules28155910)
Supplement: Supplementary file 1 [file molecules-28-05910-s001.zip › 4-AK-B1_2zu1_final.cif]

data_th_ak_b1_mo_autored
_audit_creation_date               2021-11-29
_audit_creation_method
;
Olex2 1.3
(compiled 2020.11.12 svn.r5f609507 for OlexSys, GUI svn.r6408)
;
_shelx_SHELXL_version_number       '2017/1'
_audit_contact_author_address      ?
_audit_contact_author_email        ?
_audit_contact_author_name         ''
_audit_contact_author_phone        ?
_publ_contact_author_id_orcid      ?
_publ_section_references
;
Dolomanov, O.V., Bourhis, L.J., Gildea, R.J, Howard, J.A.K. & Puschmann, H.
 (2009), J. Appl. Cryst. 42, 339-341.

Sheldrick, G.M. (2008). Acta Cryst. A64, 112-122.

Sheldrick, G.M. (2015). Acta Cryst. A71, 3-8.
;
_chemical_name_common              ?
_chemical_name_systematic          ?
_chemical_formula_moiety           'C3 F2 I, C12 H11 N O2 S'
_chemical_formula_sum              'C15 H11 F2 I N O2 S'
_chemical_formula_weight           434.21
_chemical_melting_point            ?
_chemical_oxdiff_formula           C15H11N1O2S1F2I1
_chemical_oxdiff_usercomment       block
loop_
  _atom_type_symbol
  _atom_type_description
  _atom_type_scat_dispersion_real
  _atom_type_scat_dispersion_imag
  _atom_type_scat_source
 'C' 'C' 0.0033 0.0016 'International Tables Vol C Tables 4.2.6.8 and 6.1.1.4'
 'H' 'H' 0.0000 0.0000 'International Tables Vol C Tables 4.2.6.8 and 6.1.1.4'
 'N' 'N' 0.0061 0.0033 'International Tables Vol C Tables 4.2.6.8 and 6.1.1.4'
 'O' 'O' 0.0106 0.0060 'International Tables Vol C Tables 4.2.6.8 and 6.1.1.4'
 'F' 'F' 0.0171 0.0103 'International Tables Vol C Tables 4.2.6.8 and 6.1.1.4'
 'S' 'S' 0.1246 0.1234 'International Tables Vol C Tables 4.2.6.8 and 6.1.1.4'
 'I' 'I' -0.4742 1.8119 'International Tables Vol C Tables 4.2.6.8 and 6.1.1.4'

_shelx_space_group_comment
;
The symmetry employed for this shelxl refinement is uniquely defined
by the following loop, which should always be used as a source of
symmetry information in preference to the above space-group names.
They are only intended as comments.
;
_space_group_crystal_system        'monoclinic'
_space_group_IT_number             14
_space_group_name_H-M_alt          'P 1 21/n 1'
_space_group_name_Hall             '-P 2yn'
loop_
  _space_group_symop_operation_xyz
 'x, y, z'
 '-x+1/2, y+1/2, -z+1/2'
 '-x, -y, -z'
 'x-1/2, -y-1/2, z-1/2'

_cell_length_a                     10.6190(2)
_cell_length_b                     6.03240(10)
_cell_length_c                     23.9571(6)
_cell_angle_alpha                  90
_cell_angle_beta                   95.244(2)
_cell_angle_gamma                  90
_cell_volume                       1528.22(5)
_cell_formula_units_Z              4
_cell_measurement_reflns_used      7500
_cell_measurement_temperature      100(2)
_cell_measurement_theta_max        30.2290
_cell_measurement_theta_min        2.1840
_shelx_estimated_absorpt_T_max     0.811
_shelx_estimated_absorpt_T_min     0.593
_exptl_absorpt_coefficient_mu      2.259
_exptl_absorpt_correction_T_max    1.000
_exptl_absorpt_correction_T_min    0.517
_exptl_absorpt_correction_type     gaussian
_exptl_absorpt_process_details
;
CrysAlisPro 1.171.41.92a (Rigaku Oxford Diffraction, 2020)
Numerical absorption correction based on gaussian integration over
a multifaceted crystal model
Empirical absorption correction using spherical harmonics,
implemented in SCALE3 ABSPACK scaling algorithm.
;
_exptl_absorpt_special_details     ?
_exptl_crystal_colour              'clear colourless'
_exptl_crystal_colour_lustre       clear
_exptl_crystal_colour_primary      colourless
_exptl_crystal_density_diffrn      1.887
_exptl_crystal_density_meas        ?
_exptl_crystal_density_method      ?
_exptl_crystal_description         block
_exptl_crystal_F_000               844
loop_
  _exptl_crystal_face_index_h
  _exptl_crystal_face_index_k
  _exptl_crystal_face_index_l
  _exptl_crystal_face_perp_dist
 0 5 2 0.1215
 -5 -3 5 0.1239
 2 0 -5 0.1094
 -1 0 1 0.0867
 5 0 -2 0.1127
 -5 2 5 0.1145
 -3 -5 -5 0.1334
 2 2 -5 0.1325
 3 5 5 0.1209
 0 0 1 0.0330
 0 0 -1 0.0638
 1 -1 -1 0.0867
 -3 0 -5 0.0972

_exptl_crystal_size_max            0.258
_exptl_crystal_size_mid            0.212
_exptl_crystal_size_min            0.097
loop_
  _exptl_oxdiff_crystal_face_indexfrac_h
  _exptl_oxdiff_crystal_face_indexfrac_k
  _exptl_oxdiff_crystal_face_indexfrac_l
  _exptl_oxdiff_crystal_face_x
  _exptl_oxdiff_crystal_face_y
  _exptl_oxdiff_crystal_face_z
 -0.0011 4.9977 1.9954 0.2565 0.4968 0.1893
 -4.9979 -2.9976 5.0030 -0.4464 -0.2061 0.0894
 1.9991 -0.0004 -4.9983 0.1129 -0.0162 -0.1531
 -0.9997 0.0002 1.0002 -0.0589 0.0204 0.0337
 4.9992 -0.0010 -2.0033 0.2992 -0.1263 -0.0831
 -4.9993 2.0000 4.9998 -0.1931 0.3070 0.2216
 -2.9990 -4.9971 -4.9905 -0.4428 -0.3868 -0.2592
 1.9985 1.9987 -4.9996 0.2143 0.1890 -0.1002
 2.9990 4.9971 4.9905 0.4428 0.3868 0.2592
 0.0001 0.0000 0.9993 0.0016 -0.0082 0.0285
 -0.0001 -0.0000 -0.9993 -0.0016 0.0082 -0.0285
 1.0000 -0.9997 -0.9996 0.0082 -0.1230 -0.0602
 -3.0003 0.0006 -4.9937 -0.1895 0.1263 -0.1270

_exptl_transmission_factor_max     ?
_exptl_transmission_factor_min     ?
_diffrn_reflns_av_R_equivalents    0.0273
_diffrn_reflns_av_unetI/netI       0.0269
_diffrn_reflns_Laue_measured_fraction_full  0.999
_diffrn_reflns_Laue_measured_fraction_max  0.811
_diffrn_reflns_limit_h_max         14
_diffrn_reflns_limit_h_min         -14
_diffrn_reflns_limit_k_max         8
_diffrn_reflns_limit_k_min         -6
_diffrn_reflns_limit_l_max         28
_diffrn_reflns_limit_l_min         -32
_diffrn_reflns_number              11111
_diffrn_reflns_point_group_measured_fraction_full  0.999
_diffrn_reflns_point_group_measured_fraction_max  0.811
_diffrn_reflns_theta_full          25.242
_diffrn_reflns_theta_max           30.114
_diffrn_reflns_theta_min           2.034
_diffrn_ambient_environment        N~2~
_diffrn_ambient_temperature        100(2)
_diffrn_detector                   'Hybrid Pixel Array Detector'
_diffrn_detector_area_resol_mean   10.0000
_diffrn_detector_type              HyPix
_diffrn_measured_fraction_theta_full  0.999
_diffrn_measured_fraction_theta_max  0.811
_diffrn_measurement_details
;
List of Runs (angles in degrees, time in seconds):

  # Type    Start    End  Width  t~exp~   \w     \q     \k     \f   Frames
--------------------------------------------------------------------------
  1  \w    -23.00  28.00   0.50    0.84    --    1.96 -99.00  60.00  102
  2  \w    -19.00  12.00   0.50    0.84    --    1.96 -99.00 150.00   62
  3  \w    -69.00 -28.00   0.50    0.84    --    1.72 -19.00 120.00   82
  4  \w    -12.00  74.00   0.50    0.84    --    1.96  77.00-150.00  172
;
_diffrn_measurement_device         'four-circle diffractometer'
_diffrn_measurement_device_type    'XtaLAB Synergy, Dualflex, HyPix'
_diffrn_measurement_method         '\w scans'
_diffrn_orient_matrix_type        
 'CrysAlisPro convention (1999,Acta A55,543-557)'
_diffrn_orient_matrix_UB_11        0.0605108000
_diffrn_orient_matrix_UB_12        0.0506997000
_diffrn_orient_matrix_UB_13        0.0016001000
_diffrn_orient_matrix_UB_21        -0.0285077000
_diffrn_orient_matrix_UB_22        0.1026608000
_diffrn_orient_matrix_UB_23        -0.0081602000
_diffrn_orient_matrix_UB_31        -0.0051781000
_diffrn_orient_matrix_UB_32        0.0264691000
_diffrn_orient_matrix_UB_33        0.0285547000
_diffrn_radiation_monochromator    mirror
_diffrn_radiation_probe            x-ray
_diffrn_radiation_type             'Mo K\a'
_diffrn_radiation_wavelength       0.71073
_diffrn_source                     'micro-focus sealed X-ray tube'
_diffrn_source_type                'PhotonJet (Mo) X-ray Source'
_reflns_Friedel_coverage           0.000
_reflns_Friedel_fraction_full      .
_reflns_Friedel_fraction_max       .
_reflns_number_gt                  3418
_reflns_number_total               3659
_reflns_odcompleteness_completeness  99.87
_reflns_odcompleteness_iscentric   1
_reflns_odcompleteness_theta       25.07
_reflns_special_details
;
 Reflections were merged by SHELXL according to the crystal
 class for the calculation of statistics and refinement.
 
 _reflns_Friedel_fraction is defined as the number of unique
 Friedel pairs measured divided by the number that would be
 possible theoretically, ignoring centric projections and
 systematic absences.
;
_reflns_threshold_expression       'I > 2\s(I)'
_computing_cell_refinement         'CrysAlisPro 1.171.41.92a (Rigaku OD, 2020)'
_computing_data_collection         'CrysAlisPro 1.171.41.92a (Rigaku OD, 2020)'
_computing_data_reduction          'CrysAlisPro 1.171.41.92a (Rigaku OD, 2020)'
_computing_molecular_graphics      'Olex2 1.3 (Dolomanov et al., 2009)'
_computing_publication_material    'Olex2 1.3 (Dolomanov et al., 2009)'
_computing_structure_refinement    'XL  (Sheldrick, 2008)'
_computing_structure_solution      'SHELXT 2014/5 (Sheldrick, 2014)'
_refine_diff_density_max           0.437
_refine_diff_density_min           -0.339
_refine_diff_density_rms           0.076
_refine_ls_extinction_coef         .
_refine_ls_extinction_method       none
_refine_ls_goodness_of_fit_ref     1.059
_refine_ls_hydrogen_treatment      refxyz
_refine_ls_matrix_type             full
_refine_ls_number_parameters       242
_refine_ls_number_reflns           3659
_refine_ls_number_restraints       0
_refine_ls_R_factor_all            0.0222
_refine_ls_R_factor_gt             0.0202
_refine_ls_restrained_S_all        1.059
_refine_ls_shift/su_max            0.004
_refine_ls_shift/su_mean           0.000
_refine_ls_structure_factor_coef   Fsqd
_refine_ls_weighting_details      
 'w=1/[\s^2^(Fo^2^)+(0.0143P)^2^+0.8918P] where P=(Fo^2^+2Fc^2^)/3'
_refine_ls_weighting_scheme        calc
_refine_ls_wR_factor_gt            0.0450
_refine_ls_wR_factor_ref           0.0458
_refine_special_details            ?
_olex2_refinement_description
;
1. Fixed Uiso
 At 1.2 times of:
  All H(H) groups
;
_atom_sites_solution_hydrogens     difmap
_atom_sites_solution_primary       dual
_atom_sites_solution_secondary     ?
loop_
  _atom_site_label
  _atom_site_type_symbol
  _atom_site_fract_x
  _atom_site_fract_y
  _atom_site_fract_z
  _atom_site_U_iso_or_equiv
  _atom_site_adp_type
  _atom_site_occupancy
  _atom_site_site_symmetry_order
  _atom_site_calc_flag
  _atom_site_refinement_flags_posn
  _atom_site_refinement_flags_adp
  _atom_site_refinement_flags_occupancy
  _atom_site_disorder_assembly
  _atom_site_disorder_group
 I1 I 0.72920(2) 0.64971(2) 0.56504(2) 0.01916(5) Uani 1 1 d . . . . .
 S1 S 0.93355(4) 0.16243(7) 0.75353(2) 0.01434(9) Uani 1 1 d . . . . .
 F1 F 0.74818(10) 1.0788(2) 0.48796(5) 0.0239(3) Uani 1 1 d . . . . .
 F2 F 0.42749(11) 0.64931(19) 0.56054(5) 0.0243(3) Uani 1 1 d . . . . .
 O1 O 0.83065(13) 0.0855(2) 0.78349(6) 0.0215(3) Uani 1 1 d . . . . .
 O2 O 1.02636(12) 0.0100(2) 0.73652(6) 0.0192(3) Uani 1 1 d . . . . .
 N1 N 0.86606(14) 0.2783(3) 0.69670(7) 0.0157(3) Uani 1 1 d . . . . .
 C13 C 0.59269(17) 0.8563(3) 0.52537(8) 0.0149(3) Uani 1 1 d . . . . .
 C14 C 0.62574(16) 1.0371(3) 0.49448(8) 0.0163(4) Uani 1 1 d . . . . .
 C15 C 0.46468(17) 0.8209(3) 0.53051(8) 0.0165(4) Uani 1 1 d . . . . .
 C7 C 0.94445(16) 0.3537(3) 0.65462(8) 0.0137(3) Uani 1 1 d . . . . .
 C12 C 0.95907(17) 0.2147(3) 0.60917(8) 0.0173(4) Uani 1 1 d . . . . .
 C2 C 0.93929(17) 0.5117(3) 0.82541(8) 0.0169(4) Uani 1 1 d . . . . .
 C8 C 1.00336(18) 0.5602(3) 0.65833(8) 0.0180(4) Uani 1 1 d . . . . .
 C11 C 1.03293(19) 0.2834(4) 0.56745(8) 0.0220(4) Uani 1 1 d . . . . .
 C4 C 1.12845(18) 0.7135(3) 0.85643(8) 0.0207(4) Uani 1 1 d . . . . .
 C6 C 1.14177(17) 0.4016(3) 0.79439(8) 0.0176(4) Uani 1 1 d . . . . .
 C9 C 1.07719(18) 0.6259(3) 0.61601(9) 0.0212(4) Uani 1 1 d . . . . .
 C3 C 0.99821(19) 0.6827(3) 0.85644(8) 0.0198(4) Uani 1 1 d . . . . .
 C5 C 1.19956(18) 0.5739(4) 0.82556(8) 0.0207(4) Uani 1 1 d . . . . .
 C1 C 1.01137(16) 0.3727(3) 0.79487(8) 0.0139(3) Uani 1 1 d . . . . .
 C10 C 1.09190(18) 0.4890(4) 0.57091(9) 0.0221(4) Uani 1 1 d . . . . .
 H10 H 1.140(2) 0.528(4) 0.5432(11) 0.030(6) Uiso 1 1 d . . . . .
 H9 H 1.119(2) 0.764(4) 0.6183(10) 0.020(6) Uiso 1 1 d . . . . .
 H6 H 1.189(2) 0.299(4) 0.7743(10) 0.023(6) Uiso 1 1 d . . . . .
 H2 H 0.855(2) 0.490(4) 0.8254(10) 0.023(6) Uiso 1 1 d . . . . .
 H5 H 1.287(2) 0.600(4) 0.8240(10) 0.025(6) Uiso 1 1 d . . . . .
 H1 H 0.812(3) 0.358(4) 0.7047(11) 0.030 Uiso 1 1 d . U . . .
 H8 H 0.993(2) 0.651(4) 0.6881(10) 0.019(6) Uiso 1 1 d . . . . .
 H3 H 0.948(2) 0.774(4) 0.8779(11) 0.029(6) Uiso 1 1 d . . . . .
 H12 H 0.922(2) 0.080(4) 0.6077(10) 0.026(6) Uiso 1 1 d . . . . .
 H4 H 1.168(2) 0.828(4) 0.8758(11) 0.026(6) Uiso 1 1 d . . . . .
 H11 H 1.039(3) 0.198(5) 0.5363(12) 0.039(7) Uiso 1 1 d . . . . .

loop_
  _atom_site_aniso_label
  _atom_site_aniso_U_11
  _atom_site_aniso_U_22
  _atom_site_aniso_U_33
  _atom_site_aniso_U_23
  _atom_site_aniso_U_13
  _atom_site_aniso_U_12
 I1 0.01617(7) 0.02164(7) 0.01934(7) 0.00446(5) -0.00011(5) 0.00457(4)
 S1 0.01363(19) 0.0137(2) 0.0160(2) -0.00017(16) 0.00257(16) -0.00122(15)
 F1 0.0122(5) 0.0271(6) 0.0326(7) 0.0074(5) 0.0036(5) -0.0015(4)
 F2 0.0201(5) 0.0232(6) 0.0299(6) 0.0135(5) 0.0029(5) -0.0027(5)
 O1 0.0209(6) 0.0230(7) 0.0216(7) 0.0004(6) 0.0066(6) -0.0074(6)
 O2 0.0204(6) 0.0148(6) 0.0223(7) -0.0001(5) 0.0020(5) 0.0036(5)
 N1 0.0119(7) 0.0190(8) 0.0163(7) -0.0012(6) 0.0022(6) 0.0023(6)
 C13 0.0152(8) 0.0160(9) 0.0133(8) -0.0016(7) -0.0002(7) 0.0025(7)
 C14 0.0107(7) 0.0212(9) 0.0170(9) 0.0000(7) 0.0020(7) -0.0016(7)
 C15 0.0175(8) 0.0156(9) 0.0164(9) 0.0021(7) 0.0024(7) -0.0018(7)
 C7 0.0108(7) 0.0153(9) 0.0148(8) 0.0005(7) -0.0004(7) 0.0029(6)
 C12 0.0184(8) 0.0148(9) 0.0181(9) -0.0029(7) -0.0005(7) 0.0016(7)
 C2 0.0147(8) 0.0189(9) 0.0173(9) 0.0012(7) 0.0017(7) 0.0005(7)
 C8 0.0199(8) 0.0149(9) 0.0186(9) -0.0028(8) -0.0022(7) 0.0017(7)
 C11 0.0224(9) 0.0270(10) 0.0170(9) -0.0024(8) 0.0032(8) 0.0054(8)
 C4 0.0220(9) 0.0183(9) 0.0207(9) 0.0000(8) -0.0039(8) -0.0051(8)
 C6 0.0151(8) 0.0195(9) 0.0184(9) 0.0020(7) 0.0024(7) 0.0012(7)
 C9 0.0199(9) 0.0174(10) 0.0256(10) 0.0053(8) -0.0025(8) -0.0023(7)
 C3 0.0221(9) 0.0194(10) 0.0179(9) -0.0007(8) 0.0024(8) 0.0018(7)
 C5 0.0145(8) 0.0263(10) 0.0206(9) 0.0029(8) -0.0013(7) -0.0028(7)
 C1 0.0148(8) 0.0131(8) 0.0134(8) 0.0012(7) -0.0005(7) -0.0017(6)
 C10 0.0166(8) 0.0297(11) 0.0203(9) 0.0078(8) 0.0034(8) 0.0021(8)

_geom_special_details
;
 All esds (except the esd in the dihedral angle between two l.s. planes)
 are estimated using the full covariance matrix.  The cell esds are taken
 into account individually in the estimation of esds in distances, angles
 and torsion angles; correlations between esds in cell parameters are only
 used when they are defined by crystal symmetry.  An approximate (isotropic)
 treatment of cell esds is used for estimating esds involving l.s. planes.
;
loop_
  _geom_bond_atom_site_label_1
  _geom_bond_atom_site_label_2
  _geom_bond_distance
  _geom_bond_site_symmetry_2
  _geom_bond_publ_flag
 I1 C13 2.0749(18) . ?
 S1 O1 1.4379(14) . ?
 S1 O2 1.4338(14) . ?
 S1 N1 1.6365(16) . ?
 S1 C1 1.7671(18) . ?
 F1 C14 1.347(2) . ?
 F2 C15 1.341(2) . ?
 N1 C7 1.438(2) . ?
 N1 H1 0.79(3) . ?
 C13 C14 1.381(3) . ?
 C13 C15 1.393(3) . ?
 C14 C15 1.381(3) 3_676 ?
 C7 C12 1.394(3) . ?
 C7 C8 1.393(3) . ?
 C12 C11 1.389(3) . ?
 C12 H12 0.90(3) . ?
 C2 C3 1.387(3) . ?
 C2 C1 1.388(3) . ?
 C2 H2 0.91(2) . ?
 C8 C9 1.395(3) . ?
 C8 H8 0.91(2) . ?
 C11 C10 1.389(3) . ?
 C11 H11 0.91(3) . ?
 C4 C3 1.395(3) . ?
 C4 C5 1.388(3) . ?
 C4 H4 0.91(3) . ?
 C6 C5 1.390(3) . ?
 C6 C1 1.397(2) . ?
 C6 H6 0.95(3) . ?
 C9 C10 1.380(3) . ?
 C9 H9 0.94(3) . ?
 C3 H3 0.95(3) . ?
 C5 H5 0.94(3) . ?
 C10 H10 0.91(3) . ?

loop_
  _geom_angle_atom_site_label_1
  _geom_angle_atom_site_label_2
  _geom_angle_atom_site_label_3
  _geom_angle
  _geom_angle_site_symmetry_1
  _geom_angle_site_symmetry_3
  _geom_angle_publ_flag
 O1 S1 N1 104.96(8) . . ?
 O1 S1 C1 106.84(9) . . ?
 O2 S1 O1 120.56(9) . . ?
 O2 S1 N1 107.31(8) . . ?
 O2 S1 C1 108.73(8) . . ?
 N1 S1 C1 107.84(9) . . ?
 S1 N1 H1 109(2) . . ?
 C7 N1 S1 118.73(12) . . ?
 C7 N1 H1 117(2) . . ?
 C14 C13 I1 121.24(13) . . ?
 C14 C13 C15 117.78(16) . . ?
 C15 C13 I1 120.95(14) . . ?
 F1 C14 C13 120.30(16) . . ?
 F1 C14 C15 118.29(17) . 3_676 ?
 C15 C14 C13 121.41(16) 3_676 . ?
 F2 C15 C13 120.24(16) . . ?
 F2 C15 C14 118.95(16) . 3_676 ?
 C14 C15 C13 120.81(17) 3_676 . ?
 C12 C7 N1 118.06(17) . . ?
 C8 C7 N1 121.53(17) . . ?
 C8 C7 C12 120.40(18) . . ?
 C7 C12 H12 119.4(16) . . ?
 C11 C12 C7 119.55(19) . . ?
 C11 C12 H12 121.0(16) . . ?
 C3 C2 C1 119.24(17) . . ?
 C3 C2 H2 120.3(15) . . ?
 C1 C2 H2 120.5(16) . . ?
 C7 C8 C9 119.12(18) . . ?
 C7 C8 H8 120.1(15) . . ?
 C9 C8 H8 120.8(15) . . ?
 C12 C11 H11 120.3(18) . . ?
 C10 C11 C12 120.33(19) . . ?
 C10 C11 H11 119.2(18) . . ?
 C3 C4 H4 120.5(16) . . ?
 C5 C4 C3 120.44(19) . . ?
 C5 C4 H4 119.1(16) . . ?
 C5 C6 C1 118.58(18) . . ?
 C5 C6 H6 122.0(14) . . ?
 C1 C6 H6 119.3(14) . . ?
 C8 C9 H9 120.1(15) . . ?
 C10 C9 C8 120.71(19) . . ?
 C10 C9 H9 119.1(15) . . ?
 C2 C3 C4 119.84(19) . . ?
 C2 C3 H3 118.5(15) . . ?
 C4 C3 H3 121.6(15) . . ?
 C4 C5 C6 120.32(18) . . ?
 C4 C5 H5 120.2(15) . . ?
 C6 C5 H5 119.4(15) . . ?
 C2 C1 S1 118.48(14) . . ?
 C2 C1 C6 121.59(17) . . ?
 C6 C1 S1 119.88(15) . . ?
 C11 C10 H10 118.0(17) . . ?
 C9 C10 C11 119.89(19) . . ?
 C9 C10 H10 122.1(17) . . ?

loop_
  _geom_hbond_atom_site_label_D
  _geom_hbond_atom_site_label_H
  _geom_hbond_atom_site_label_A
  _geom_hbond_distance_DH
  _geom_hbond_distance_HA
  _geom_hbond_distance_DA
  _geom_hbond_angle_DHA
  _geom_hbond_site_symmetry_A
  _geom_hbond_publ_flag
 N1 H1 O1 0.79(3) 2.08(3) 2.864(2) 173(3) 2_656 yes
 C8 H8 O2 0.91(2) 2.47(2) 3.294(2) 151(2) 1_565 yes

loop_
  _geom_torsion_atom_site_label_1
  _geom_torsion_atom_site_label_2
  _geom_torsion_atom_site_label_3
  _geom_torsion_atom_site_label_4
  _geom_torsion
  _geom_torsion_site_symmetry_1
  _geom_torsion_site_symmetry_2
  _geom_torsion_site_symmetry_3
  _geom_torsion_site_symmetry_4
  _geom_torsion_publ_flag
 I1 C13 C14 F1 2.2(2) . . . . ?
 I1 C13 C14 C15 -177.92(14) . . . 3_676 ?
 I1 C13 C15 F2 -1.2(2) . . . . ?
 I1 C13 C15 C14 177.92(14) . . . 3_676 ?
 S1 N1 C7 C12 97.08(18) . . . . ?
 S1 N1 C7 C8 -83.7(2) . . . . ?
 O1 S1 N1 C7 -173.94(14) . . . . ?
 O1 S1 C1 C2 -35.25(17) . . . . ?
 O1 S1 C1 C6 147.42(15) . . . . ?
 O2 S1 N1 C7 -44.55(16) . . . . ?
 O2 S1 C1 C2 -166.82(15) . . . . ?
 O2 S1 C1 C6 15.85(18) . . . . ?
 N1 S1 C1 C2 77.13(16) . . . . ?
 N1 S1 C1 C6 -100.20(16) . . . . ?
 N1 C7 C12 C11 179.26(16) . . . . ?
 N1 C7 C8 C9 -179.27(16) . . . . ?
 C14 C13 C15 F2 -179.26(17) . . . . ?
 C14 C13 C15 C14 -0.1(3) . . . 3_676 ?
 C15 C13 C14 F1 -179.76(17) . . . . ?
 C15 C13 C14 C15 0.1(3) . . . 3_676 ?
 C7 C12 C11 C10 0.0(3) . . . . ?
 C7 C8 C9 C10 0.1(3) . . . . ?
 C12 C7 C8 C9 -0.1(3) . . . . ?
 C12 C11 C10 C9 0.0(3) . . . . ?
 C8 C7 C12 C11 0.0(3) . . . . ?
 C8 C9 C10 C11 -0.1(3) . . . . ?
 C3 C2 C1 S1 -177.65(15) . . . . ?
 C3 C2 C1 C6 -0.4(3) . . . . ?
 C3 C4 C5 C6 -0.1(3) . . . . ?
 C5 C4 C3 C2 0.0(3) . . . . ?
 C5 C6 C1 S1 177.45(15) . . . . ?
 C5 C6 C1 C2 0.2(3) . . . . ?
 C1 S1 N1 C7 72.42(16) . . . . ?
 C1 C2 C3 C4 0.3(3) . . . . ?
 C1 C6 C5 C4 0.0(3) . . . . ?

_shelx_res_file
;
TITL th_ak_b1_mo_autored_a.res in P2(1)/n
    th_ak_b1_mo_autored.res
    created by SHELXL-2017/1 at 11:16:37 on 29-Nov-2021
REM Old TITL TH_AK_B1_mo_autored in P2(1)/n
REM SHELXT solution in P2(1)/n
REM R1 0.061, Rweak 0.003, Alpha 0.051, Orientation as input
REM Formula found by SHELXT: C15 N O2 F2 S I
REM Instructions for potential hydrogen bonds
CELL 0.71073 10.619 6.0324 23.9571 90 95.244 90
ZERR 4 0.0002 0.0001 0.0006 0 0.002 0
LATT 1
SYMM 0.5-X,0.5+Y,0.5-Z
SFAC C H N O F S I
UNIT 60 44 4 8 8 4 4
EQIV $1 1.5-X,0.5+Y,1.5-Z
EQIV $2 +X,1+Y,+Z

L.S. 200
PLAN  1
SIZE 0.097 0.212 0.258
TEMP -173(2)
CONF
HTAB N1 O1_$1
HTAB C8 O2_$2
BOND $H
list 4
MORE -1
fmap 2 53
acta
REM <olex2.extras>
REM <HklSrc "%.\\TH_AK_B1_mo_autored.hkl">
REM </olex2.extras>

WGHT    0.014300    0.891800
FVAR       0.39050
I1    7    0.729197    0.649712    0.565038    11.00000    0.01617    0.02164 =
         0.01934    0.00446   -0.00011    0.00457
S1    6    0.933547    0.162427    0.753534    11.00000    0.01363    0.01365 =
         0.01596   -0.00017    0.00257   -0.00122
F1    5    0.748184    1.078809    0.487965    11.00000    0.01218    0.02713 =
         0.03260    0.00735    0.00359   -0.00149
F2    5    0.427489    0.649308    0.560539    11.00000    0.02008    0.02323 =
         0.02985    0.01350    0.00292   -0.00271
O1    4    0.830648    0.085520    0.783488    11.00000    0.02091    0.02297 =
         0.02155    0.00044    0.00655   -0.00744
O2    4    1.026361    0.010043    0.736521    11.00000    0.02038    0.01482 =
         0.02234   -0.00013    0.00195    0.00357
N1    3    0.866065    0.278346    0.696700    11.00000    0.01189    0.01903 =
         0.01630   -0.00121    0.00215    0.00227
C13   1    0.592692    0.856273    0.525370    11.00000    0.01524    0.01596 =
         0.01334   -0.00161   -0.00016    0.00253
C14   1    0.625736    1.037132    0.494482    11.00000    0.01072    0.02119 =
         0.01700   -0.00002    0.00197   -0.00161
C15   1    0.464677    0.820919    0.530512    11.00000    0.01754    0.01563 =
         0.01640    0.00205    0.00245   -0.00182
C7    1    0.944454    0.353655    0.654623    11.00000    0.01080    0.01528 =
         0.01478    0.00052   -0.00043    0.00293
C12   1    0.959065    0.214709    0.609168    11.00000    0.01845    0.01482 =
         0.01814   -0.00295   -0.00054    0.00160
C2    1    0.939289    0.511699    0.825408    11.00000    0.01468    0.01886 =
         0.01728    0.00124    0.00175    0.00049
C8    1    1.003358    0.560169    0.658333    11.00000    0.01987    0.01493 =
         0.01858   -0.00280   -0.00215    0.00168
C11   1    1.032931    0.283396    0.567455    11.00000    0.02242    0.02701 =
         0.01697   -0.00243    0.00316    0.00540
C4    1    1.128448    0.713488    0.856429    11.00000    0.02204    0.01834 =
         0.02066    0.00003   -0.00392   -0.00513
C6    1    1.141774    0.401590    0.794388    11.00000    0.01505    0.01950 =
         0.01841    0.00195    0.00238    0.00117
C9    1    1.077186    0.625877    0.616007    11.00000    0.01990    0.01738 =
         0.02558    0.00526   -0.00248   -0.00233
C3    1    0.998206    0.682693    0.856438    11.00000    0.02212    0.01941 =
         0.01793   -0.00074    0.00236    0.00183
C5    1    1.199558    0.573936    0.825559    11.00000    0.01454    0.02632 =
         0.02059    0.00291   -0.00130   -0.00281
C1    1    1.011368    0.372686    0.794871    11.00000    0.01478    0.01308 =
         0.01343    0.00123   -0.00045   -0.00167
C10   1    1.091905    0.489029    0.570907    11.00000    0.01655    0.02969 =
         0.02027    0.00780    0.00341    0.00206
H10   2    1.139991    0.527868    0.543167    11.00000    0.02965
H9    2    1.119019    0.763887    0.618286    11.00000    0.01994
H6    2    1.188862    0.299124    0.774322    11.00000    0.02310
H2    2    0.854834    0.490183    0.825427    11.00000    0.02271
H5    2    1.286903    0.600169    0.824017    11.00000    0.02488
H1    2    0.812170    0.358394    0.704674    11.00000   -1.20000
H8    2    0.993034    0.650961    0.688054    11.00000    0.01877
H3    2    0.948487    0.774255    0.877862    11.00000    0.02859
H12   2    0.921737    0.080173    0.607711    11.00000    0.02576
H4    2    1.167601    0.827759    0.875845    11.00000    0.02624
H11   2    1.039111    0.197679    0.536338    11.00000    0.03858
HKLF 4


REM  th_ak_b1_mo_autored_a.res in P2(1)/n
REM R1 =  0.0202 for    3418 Fo > 4sig(Fo)  and  0.0222 for all    3659 data
REM    242 parameters refined using      0 restraints

END

WGHT      0.0143      0.8910

REM Highest difference peak  0.437,  deepest hole -0.339,  1-sigma level  0.076
Q1    1   0.9820  0.2731  0.7777  11.00000  0.05    0.44
;
_shelx_res_checksum                57728
_shelx_hkl_file
;
   0   0  -3    0.29    0.48
   0   0  -4  745.93   18.52
   0   0  -5    0.16    0.49
   0   0  -6 2123.91   49.57
   0   0  -7    0.22    0.54
   0   0  -8 2968.60   68.80
   0   0  -9    1.12    0.68
   0   0 -10 2223.02   54.08
   0   0 -11    2.03    1.09
   0   0 -12  446.82   15.55
   0   0 -13    1.19    1.10
   0   0 -14 1958.30   51.90
   0   0 -14 2037.41   51.47
   0   0 -15    3.43    1.75
   0   0 -15    2.27    1.78
   0   0 -16 3119.18   77.91
   0   0 -16 3166.74   77.31
   0   0 -17    2.21    1.70
   0   0 -17    1.02    1.41
   0   0 -18  227.33   12.19
   0   0 -18  228.30   11.54
   0   0 -19    0.62    1.39
   0   0 -19    0.56    1.37
   0   0 -20    3.24    1.69
   0   0 -20    1.75    1.62
   0   0 -21    7.45    2.87
   0   0 -21    4.27    2.46
   0   0 -22 2731.19   72.54
   0   0 -22 2766.00   71.24
   0   0 -23    6.60    3.03
   0   0 -23    7.28    2.87
   0   0 -24  667.81   25.61
   0   0 -24  636.25   24.35
   0   0 -25    1.57    2.30
   0   0 -25    0.85    1.04
   0   0 -25    2.13    2.18
   0   0 -26  239.03   14.14
   0   0 -26  239.28   13.35
   0   0 -27    2.53    2.34
   0   0 -27    0.59    0.75
   0   0 -27    4.49    2.18
   0   0 -28  451.19   21.26
   0   0 -28  431.40   19.76
   0   0 -29    5.38    3.21
   0   0 -29    3.93    2.91
   0   0 -30  354.78   18.79
   0   0 -30  315.35   16.77
   0   0 -31    3.79    2.77
   0   0 -31    1.63    2.62
   0   1   0    0.14    0.37
   0   1  -1  718.61   18.71
   0   1   1  733.06   18.67
   0  -1  -2  817.71   19.51
   0   1  -2  787.92   20.59
   0   1   2  797.80   20.64
   0  -1  -3   35.54    2.14
   0   1  -3   32.11    2.46
   0   1   3   30.64    2.54
   0  -1  -4 5491.89  120.96
   0   1   4 5395.02  122.36
   0   1  -4 5510.46  122.13
   0   1   5 3532.80   83.09
   0   1  -5 3709.30   82.84
   0   1   6 4622.10  108.73
   0   1  -6 4950.96  108.54
   0  -1  -7 3800.65   86.81
   0   1  -7 3680.52   86.07
   0  -1  -8  170.03    8.34
   0   1  -8  186.05    8.07
   0  -1   8  179.17    7.72
   0  -1  -9 2498.28   59.03
   0   1  -9 2357.82   57.95
   0  -1   9 2333.62   57.34
   0  -1 -10  373.12   14.29
   0   1 -10  349.49   13.12
   0  -1  10  347.20   12.68
   0  -1 -11  636.05   21.34
   0   1 -11  605.65   20.13
   0  -1  11  650.06   19.77
   0  -1 -12 1350.34   38.77
   0   1 -12 1377.18   37.52
   0  -1  12 1406.00   37.05
   0  -1 -13  395.82   16.46
   0   1 -13  411.11   15.54
   0  -1  13  406.49   15.11
   0  -1 -14  231.34   11.96
   0   1 -14  225.78   11.07
   0  -1  14  236.41   10.99
   0  -1 -15 1036.06   32.82
   0   1 -15 1060.18   31.65
   0  -1 -16   44.58    5.18
   0  -1 -16   36.23    4.31
   0   1 -16   31.19    4.17
   0  -1 -17  362.99   16.88
   0   1 -17  375.23   16.05
   0  -1 -17  378.17   15.60
   0  -1 -18 1164.09   36.79
   0   1 -18 1127.57   34.87
   0  -1 -18 1176.28   34.64
   0  -1 -19   82.90    7.95
   0   1 -19   92.78    7.63
   0  -1 -19   94.64    7.25
   0  -1 -20 1011.71   34.29
   0   1 -20 1002.60   32.41
   0  -1 -20 1028.08   31.89
   0  -1 -21  332.89   16.60
   0   1 -21  285.88   14.01
   0   1 -21  277.65   14.44
   0  -1 -21  290.77   14.30
   0   1 -22   54.81    5.90
   0  -1 -22   40.55    6.18
   0   1 -22   50.86    6.05
   0  -1 -22   49.42    5.59
   0   1 -23  550.67   21.62
   0  -1 -23  553.38   23.71
   0   1 -23  553.90   22.31
   0  -1 -23  552.35   21.83
   0  -1 -24  126.11   10.53
   0   1 -24  129.90    9.46
   0   1 -24  110.53    9.16
   0  -1 -24  126.96    9.34
   0  -1 -25   71.01    8.19
   0   1 -25   84.40    7.80
   0   1 -25   78.91    7.67
   0  -1 -25   85.15    7.74
   0  -1 -26  135.37   11.29
   0   1 -26  120.09    9.60
   0   1 -26  162.48   11.17
   0  -1 -26  156.18   10.60
   0  -1 -27    3.82    3.18
   0   1 -27    7.57    3.21
   0   1 -27    9.50    3.27
   0  -1 -27    8.10    3.41
   0  -1 -28  533.11   24.58
   0   1 -28  515.56   22.12
   0   1 -28  494.62   22.09
   0  -1 -28  547.21   22.37
   0  -1 -29   11.03    4.15
   0   1 -29   12.80    3.78
   0   1 -29   11.56    3.50
   0  -1 -29    8.51    3.21
   0   1 -30   16.46    4.25
   0   1 -30   20.32    4.58
   0  -1 -30   23.80    4.71
   0   1 -31  230.79   14.40
   0  -1 -31  225.37   13.94
   0   1 -31  232.15   14.55
   0   2   0  447.58   14.31
   0   2   1 2571.26   61.17
   0   2  -1 2559.75   60.68
   0   2   2  244.20    9.74
   0   2   3 2661.24   61.98
   0   2  -3 2751.56   64.44
   0   2   3 2678.39   64.41
   0   2   4  402.87   11.99
   0   2  -4  377.49   13.87
   0   2   4  391.29   13.90
   0  -2  -5 2912.71   68.87
   0   2   5 3103.12   68.40
   0   2  -5 2871.46   71.28
   0   2   5 2941.79   71.33
   0  -2  -6  823.78   22.46
   0   2  -6  827.84   24.56
   0   2   6  805.65   24.31
   0  -2  -7  186.25    7.90
   0   2  -7  174.86    8.90
   0   2   7  182.82    9.10
   0  -2  -8  202.03    8.54
   0   2  -8  186.61    9.39
   0  -2   8  196.97    9.27
   0   2   8  184.71    9.54
   0  -2  -9  259.13   10.42
   0   2  -9  260.82   11.57
   0  -2   9  255.07   11.06
   0   2   9  255.04   11.71
   0  -2 -10  302.72   11.96
   0   2 -10  307.03   13.00
   0  -2  10  321.01   12.77
   0  -2 -11 6194.46  141.76
   0   2 -11 6146.09  143.90
   0  -2  11 6308.81  142.56
   0  -2 -12   93.49    7.51
   0   2 -12  101.61    7.30
   0  -2 -13 1298.79   39.20
   0   2 -13 1289.96   37.57
   0  -2 -14   76.83    7.15
   0   2 -14   73.37    6.54
   0  -2 -15  831.42   29.55
   0   2 -15  866.63   28.42
   0  -2 -16  228.14   13.60
   0   2 -16  247.02   12.98
   0  -2  16  246.42   12.15
   0  -2 -17  468.50   20.99
   0   2 -17  476.78   19.56
   0  -2  17  455.89   18.26
   0  -2 -18  116.53    9.66
   0   2 -18  109.77    8.63
   0  -2  18  101.00    7.79
   0  -2 -19 1056.53   36.28
   0   2 -19 1026.62   33.98
   0  -2  19 1029.61   32.66
   0  -2 -20   28.21    5.24
   0   2 -20   21.51    4.31
   0  -2  20   19.79    3.85
   0  -2 -21  662.70   26.97
   0   2 -21  582.90   24.24
   0  -2  21  634.12   23.87
   0  -2 -22  265.22   16.23
   0   2 -22  272.24   15.01
   0  -2 -22  279.57   14.50
   0  -2 -23   -1.94    2.19
   0   2 -23    2.41    2.10
   0  -2 -23    0.71    2.08
   0  -2 -24  145.64   12.12
   0   2 -24  140.55   10.79
   0  -2 -24  158.48   10.82
   0  -2 -25  184.42   13.63
   0   2 -25  153.33   10.17
   0   2 -25  150.75   11.40
   0  -2 -25  160.60   10.99
   0   2 -26    1.95    1.80
   0   2 -26    2.57    2.63
   0  -2 -26   -0.76    2.10
   0   2 -27  781.98   28.31
   0  -2 -27  888.80   34.39
   0   2 -27  854.70   31.33
   0  -2 -27  828.26   29.95
   0  -2 -28   53.91    7.91
   0   2 -28   61.39    6.76
   0   2 -28   57.74    7.27
   0  -2 -28   62.50    7.20
   0   2 -29   20.15    4.27
   0   2 -29   20.74    4.94
   0  -2 -29    8.88    3.26
   0   2 -30   18.33    4.65
   0  -2 -30   18.02    4.23
   0   3   0    0.42    1.15
   0   3   1 2343.05   59.22
   0   3  -1 2386.88   59.02
   0   3   2 1180.61   33.50
   0   3  -2 1193.91   33.15
   0   3   3  126.16    6.39
   0   3   3  132.03    7.92
   0   3   4  179.36    7.84
   0   3   4  178.88    9.55
   0   3   5  329.88   11.65
   0   3  -5  335.80   14.35
   0   3   5  328.50   14.06
   0   3   6  575.18   17.58
   0   3  -6  621.56   21.32
   0   3   6  579.43   20.77
   0   3  -7 3223.69   77.87
   0   3   7 3041.36   77.56
   0   3  -8   47.07    5.13
   0   3   8   38.06    4.64
   0  -3  -9 1458.35   39.46
   0   3  -9 1547.41   43.18
   0   3   9 1509.71   42.82
   0  -3 -10   16.66    2.79
   0   3 -10   22.71    3.73
   0  -3  10   10.71    2.64
   0  -3 -10   12.07    2.99
   0   3  10   20.19    3.49
   0  -3 -11   42.84    4.37
   0  -3  11   40.71    4.92
   0   3 -11   53.35    5.77
   0   3  11   46.67    5.35
   0  -3 -11   40.61    5.26
   0  -3 -12  140.84    8.38
   0   3 -12  150.72    9.89
   0  -3  12  141.17    9.15
   0   3  12  135.49    9.39
   0  -3 -12  133.18    9.98
   0  -3 -13  998.84   30.57
   0  -3  13 1042.73   32.01
   0   3 -13 1054.01   33.51
   0  -3 -13 1063.77   34.80
   0   3  13  950.78   32.40
   0  -3 -14  126.81    8.40
   0  -3 -14  145.16   10.73
   0   3 -14  121.96    9.31
   0  -3  14  140.97    9.17
   0  -3 -15 1155.56   35.23
   0  -3 -15 1167.58   39.13
   0   3 -15 1205.94   37.89
   0  -3  15 1203.19   36.23
   0  -3 -16  201.63   11.23
   0  -3 -16  183.70   12.69
   0   3 -16  186.99   12.09
   0  -3  16  195.42   11.35
   0  -3 -17 2365.85   62.73
   0  -3 -17 2385.32   67.46
   0   3 -17 2292.97   64.72
   0  -3  17 2384.82   62.97
   0  -3 -18   11.59    3.04
   0  -3 -18   20.88    4.81
   0   3 -18   15.21    3.93
   0  -3  18   17.26    3.69
   0  -3 -19    0.72    1.49
   0  -3 -19    0.99    2.23
   0   3 -19   -0.82    1.70
   0  -3  19    0.68    1.90
   0  -3 -20  445.68   19.59
   0  -3 -20  401.35   21.23
   0   3 -20  375.05   19.22
   0  -3  20  415.11   18.52
   0  -3 -21  147.44   10.87
   0  -3 -21  162.51   13.10
   0   3 -21  131.54   10.85
   0  -3  21  157.98   10.83
   0  -3 -22  156.05   11.37
   0  -3 -22  127.19   11.84
   0   3 -22  136.96   11.14
   0  -3  22  142.41   10.36
   0  -3 -23  770.28   29.89
   0  -3 -23  870.37   34.10
   0   3 -23  730.22   29.76
   0  -3  23  832.29   29.50
   0  -3 -24    9.03    3.64
   0  -3 -24    9.06    3.78
   0   3 -24    8.34    3.32
   0  -3  24    9.48    3.35
   0  -3 -25   89.36    9.26
   0  -3 -25   62.58    8.93
   0   3 -25   89.40    9.36
   0  -3  25   78.45    8.17
   0  -3 -26   19.15    4.77
   0   3 -26    8.61    3.65
   0  -3 -26   12.10    3.67
   0  -3 -27   19.63    4.99
   0   3 -27   29.11    5.48
   0  -3 -27   26.87    5.09
   0  -3 -28   24.14    5.44
   0   3 -28   13.76    4.28
   0  -3 -28   29.66    5.37
   0   3 -29  203.50   14.41
   0  -3 -29  195.99   13.49
   0   3 -30    2.00    2.45
   0  -4   0 2286.44   60.49
   0   4   0 2201.46   58.77
   0  -4   1  174.62   10.61
   0  -4  -1  154.20   10.10
   0   4   1  147.57    9.42
   0   4  -1  152.52    9.40
   0  -4  -2  480.11   19.70
   0  -4   2  491.90   19.72
   0   4  -2  456.60   18.26
   0   4   2  516.90   19.53
   0   4   3  561.78   18.30
   0  -4  -3  564.26   21.75
   0   4  -3  563.00   20.38
   0   4   3  545.48   21.01
   0   4   4   71.18    5.10
   0   4   4   70.94    6.45
   0   4  -4   59.84    5.70
   0   4   5  939.14   26.79
   0   4  -5  941.58   29.43
   0   4   5  939.81   30.69
   0   4   6  741.23   22.10
   0   4   6  732.61   26.12
   0   4   7   96.30    5.93
   0   4   7   91.26    7.62
   0   4  -8  770.07   28.16
   0  -4   8  821.48   28.03
   0   4   8  798.42   27.95
   0  -4   9    1.33    1.74
   0   4  -9    2.94    2.04
   0   4   9   -0.68    1.67
   0  -4  10  518.14   20.83
   0   4 -10  490.73   21.33
   0   4  10  513.29   21.29
   0   4 -11  760.11   28.33
   0  -4  11  739.20   26.89
   0   4  11  792.79   28.31
   0  -4  12    1.39    1.70
   0   4 -12    4.77    2.65
   0   4  12    3.74    2.19
   0   4 -13  148.75   11.04
   0  -4  13  158.15   10.69
   0  -4 -13  149.33   11.73
   0   4  13  168.35   11.46
   0  -4 -14  405.78   17.07
   0  -4  14  423.20   18.93
   0   4 -14  432.17   20.29
   0  -4 -14  452.29   21.56
   0   4  14  429.01   19.84
   0  -4 -15   36.69    4.76
   0  -4 -15   35.63    5.96
   0   4  15   50.92    6.35
   0   4 -15   34.66    5.55
   0  -4  15   45.24    5.90
   0  -4 -16  557.06   20.44
   0  -4 -16  630.74   25.98
   0  -4  16  613.66   22.63
   0   4 -16  589.81   23.98
   0  -4 -17  658.36   24.57
   0  -4 -17  660.83   28.92
   0   4 -17  715.73   28.36
   0  -4  17  664.79   25.85
   0  -4 -18   80.68    7.71
   0  -4 -18  103.76   10.57
   0   4 -18  113.12   10.17
   0  -4  18   88.20    8.41
   0  -4 -19  119.48    9.44
   0  -4 -19  113.42   11.44
   0   4 -19  118.87   10.77
   0  -4  19  104.72    9.26
   0  -4 -20    0.77    1.89
   0  -4 -20    2.32    2.63
   0   4 -20   -0.99    2.42
   0  -4  20    0.80    1.95
   0  -4 -21  451.73   20.42
   0  -4 -21  479.63   24.71
   0   4 -21  399.93   21.46
   0  -4  21  442.67   20.41
   0  -4 -22  698.71   27.25
   0  -4 -22  672.03   30.97
   0   4 -22  651.88   28.68
   0  -4  22  689.30   27.18
   0  -4 -23    0.88    2.31
   0   4 -23   -1.06    3.23
   0  -4  23    1.69    2.47
   0  -4 -24  105.62   10.02
   0   4 -24  119.55   11.40
   0  -4  24  101.43    9.48
   0  -4 -25   19.11    4.68
   0   4 -25    8.63    3.60
   0  -4  25   19.26    4.51
   0  -4 -26  174.17   13.45
   0   4 -26  190.13   14.35
   0  -4  26  169.23   12.82
   0  -4 -27  197.87   14.73
   0   4 -27  195.76   14.89
   0  -4  27  223.73   14.66
   0   4 -28   26.37    5.86
   0  -5   0    0.80    1.66
   0   5   0    2.05    1.79
   0  -5  -1    1.62    2.59
   0  -5   1    3.98    2.21
   0   5  -1    4.07    2.08
   0   5   1    4.19    2.04
   0   5   2 1046.01   31.15
   0  -5   2 1051.96   35.78
   0  -5  -2 1079.81   36.50
   0   5   2 1066.77   35.03
   0   5  -2 1108.99   34.75
   0   5   3   27.88    3.75
   0  -5  -3   41.29    5.88
   0   5   3   33.92    5.12
   0   5  -3   32.04    4.98
   0   5   4 1693.93   45.19
   0  -5  -4 1641.90   50.91
   0   5  -4 1733.88   49.00
   0   5   4 1815.59   50.69
   0   5   5   13.43    2.69
   0  -5  -5    5.72    2.73
   0   5  -5   12.37    3.19
   0   5   5   12.73    3.47
   0   5   6  995.77   28.96
   0  -5  -6 1022.79   35.13
   0   5  -6  962.72   32.06
   0   5   6 1026.68   34.17
   0   5   7   69.37    5.43
   0   5  -7   73.46    6.91
   0   5   7   75.88    7.72
   0  -5  -7   66.42    7.55
   0  -5   7   68.56    7.48
   0   5  -8  105.29    8.34
   0   5   8  127.00    9.96
   0  -5   8  104.13    9.26
   0   5  -9    9.08    2.61
   0   5   9    2.42    2.35
   0  -5   9    3.25    2.49
   0   5  10  612.71   25.38
   0  -5  10  650.20   25.86
   0   5  11  112.10    9.86
   0  -5 -11  109.71   10.41
   0  -5  11  119.00    9.84
   0   5  12  771.24   30.06
   0  -5  12  825.14   30.12
   0   5  13    0.88    1.83
   0  -5  13    2.51    2.19
   0   5  14  467.88   21.92
   0  -5  14  449.95   21.13
   0   5 -14  459.59   22.65
   0   5 -15  122.49   11.12
   0  -5  15  112.35    9.74
   0   5  16    1.87    2.12
   0   5 -16    1.03    2.12
   0  -5  16    2.60    2.40
   0   5  17    7.36    1.48
   0  -5 -17    4.70    3.26
   0   5 -17   10.48    3.88
   0  -5  17    4.40    2.70
   0  -5 -18  799.73   34.57
   0  -5  18  824.80   31.47
   0   5 -18  867.01   34.15
   0  -5 -19   14.97    4.90
   0   5 -19   11.93    4.37
   0  -5  19    6.26    3.21
   0   5 -20  314.74   19.02
   0  -5  20  290.12   16.98
   0   5 -21   16.85    4.99
   0  -5  21   19.17    4.56
   0   5 -22   72.00    9.30
   0  -5  22   85.22    9.13
   0   5 -23    6.96    3.72
   0   5 -24  175.31   14.46
   0  -6   0 1219.65   41.43
   0   6   0 1166.30   38.91
   0  -6  -1    4.85    2.69
   0  -6   1    3.82    2.65
   0   6  -1    6.48    2.90
   0   6   1    8.39    2.79
   0   6   1    4.97    2.86
   0   6   2  117.09    8.15
   0  -6   2  116.72   10.46
   0  -6  -2  118.42   10.65
   0   6   2  103.85    9.37
   0   6  -2  134.28   10.33
   0   6   3  341.42   14.60
   0  -6  -3  315.43   18.27
   0   6  -3  338.59   17.06
   0   6   3  320.21   17.26
   0   6   4   30.48    4.19
   0  -6  -4   37.51    6.35
   0   6   4   25.92    4.96
   0   6  -4   26.58    4.99
   0   6   5  646.19   21.58
   0  -6  -5  591.92   26.61
   0   6  -5  608.84   24.71
   0   6   5  642.79   26.27
   0   6   6  856.47   26.55
   0  -6  -6  868.48   33.27
   0   6  -6  870.84   30.64
   0   6   6  791.88   31.30
   0   6   7   19.93    3.25
   0   6   7   23.40    4.79
   0   6  -7   11.46    3.54
   0  -6   7   11.40    3.94
   0  -6  -7   12.88    4.00
   0   6   8  185.40   13.10
   0   6  -8  176.03   11.66
   0  -6   8  180.58   13.16
   0  -6  -8  159.46   12.68
   0   6   9   87.26    8.93
   0   6  -9   97.79    8.50
   0  -6   9   69.93    8.31
   0  -6  -9   80.02    9.00
   0   6  10  735.42   30.05
   0   6 -10  778.27   28.29
   0  -6 -10  750.69   30.82
   0  -6  10  794.10   31.02
   0   6 -11  224.42   13.21
   0   6  11  196.92   13.98
   0  -6  11  183.03   13.54
   0  -6 -11  198.60   14.27
   0   6 -12  191.62   12.17
   0   6  12  190.77   13.79
   0  -6 -12  181.71   13.70
   0  -6  12  179.98   13.32
   0   6  13  170.27   13.15
   0   6 -13  169.71   11.43
   0  -6  13  156.52   12.50
   0   6 -14   46.65    6.20
   0   6  14   51.70    7.63
   0  -6  14   56.75    7.75
   0  -6  15  103.56   10.15
   0   6 -15   91.71    8.44
   0   6  15   92.51    9.85
   0  -6  16  602.26   26.21
   0   6 -16  519.94   22.25
   0   6  18    7.83    1.72
   0   7   0   -0.94    2.45
   0   7   0   -3.80    2.48
   0   7  -1  590.57   25.22
   0   7   1  514.66   24.15
   0   7   1  528.79   20.89
   0   7  -2    1.83    2.67
   0   7   2    2.88    2.80
   0   7   2    2.34    1.80
   0   7  -3   71.48    8.14
   0   7   3   59.06    7.82
   0   7   3   64.65    6.13
   0   7  -4   94.06    9.38
   0   7   4  123.47   11.34
   0   7   4  118.16    8.19
   0   7  -5  257.63   15.43
   0   7   5  240.85   15.78
   0   7   5  246.60   12.18
   0   7  -6   17.40    4.20
   0   7   6   26.11    5.58
   0   7   6   18.34    3.48
   0   7   7  175.99   13.85
   0   7  -7  193.05   13.09
   0   7   8    3.11    2.87
   0   7  -8    0.86    2.37
   0   7  -9  286.40   16.22
   0   7   9  301.30   18.29
   0   7 -10   36.98    5.76
   0   7 -11   25.87    5.31
   0   7 -12   17.37    4.27
   0   7 -13  107.41    9.71
   0   8   0   25.06    4.23
   0   8  -1  135.48   12.18
   0   8  -1  152.81   10.47
   0   8   1  137.18    9.60
   0   8  -2    9.08    4.17
   0   8  -2    5.60    2.51
   0   8  -3   48.96    6.28
   0   8  -3   49.83    7.56
   0   8  -4    0.98    3.40
   0   8  -5  495.09   23.64
   0   8  -6   33.47    6.16
   1   0 -32    0.91    2.78
   1   0 -31   77.74    8.62
   1   0 -30   -0.93    2.09
   1   0 -30    0.88    2.29
   1   0 -29    8.10    3.12
   1   0 -29   11.17    3.55
   1   0 -28    5.25    3.13
   1   0 -28    0.84    2.06
   1   0 -27 1070.83   36.05
   1   0 -27 1172.21   36.56
   1   0 -26    3.32    3.34
   1   0 -26    1.41    1.00
   1   0 -26    4.80    2.45
   1   0 -25  901.38   32.26
   1   0 -25  894.81   31.65
   1   0 -24   -0.77    2.01
   1   0 -24    0.75    1.83
   1   0 -23    6.69    3.15
   1   0 -23    2.18    2.33
   1   0 -22    0.71    1.74
   1   0 -22    1.41    1.95
   1   0 -21  592.58   23.21
   1   0 -21  609.47   23.21
   1   0 -20    3.26    2.00
   1   0 -20    0.65    1.59
   1   0 -19  551.75   21.33
   1   0 -19  560.24   21.49
   1   0 -18   -0.60    1.57
   1   0 -17  302.27   14.12
   1   0 -16   -0.55    1.13
   1   0 -15    1.04    1.27
   1   0 -14   -0.49    0.91
   1   0 -13 1640.17   44.04
   1   0 -12   -0.43    0.89
   1   0 -11 3966.18   93.87
   1   0 -10    0.75    1.04
   1   0  -9 1884.34   47.34
   1   0  -8    0.63    0.65
   1   0  -7    1.14    0.74
   1   0  -6    0.26    0.67
   1   0  -5 9999.00  220.23
   1   0  -4   -0.19    0.47
   1   0  -3 3174.77   71.70
   1   0  -2    0.26    0.42
  -1   0   1 3022.97   64.04
  -1   0   1 2896.42   64.10
  -1   0  -1  181.73    5.60
  -1   0  -2    0.42    0.30
  -1   0  -3  502.95   12.55
  -1   0  -3  499.47   12.97
  -1   0  -4    0.59    0.41
  -1   0  -5 1013.11   24.94
  -1   0  -5 1031.64   23.97
  -1   0  -6    0.18    0.52
  -1   0  -6    0.13    0.35
  -1   0  -7  101.71    4.95
  -1   0  -7   99.11    4.32
  -1   0  -8    0.49    0.71
  -1   0  -8    0.37    0.52
  -1   0  -9  714.84   20.65
  -1   0  -9  732.23   19.66
  -1   0 -10    1.89    0.96
  -1   0 -10   -0.25    0.56
  -1   0 -11 1950.42   49.01
  -1   0 -11 1964.89   47.70
  -1   0 -12    0.38    1.06
  -1   0 -12    0.30    0.79
  -1   0 -13 1754.60   46.28
  -1   0 -13 1799.93   44.85
  -1   0 -14    0.45    1.01
  -1   0 -14   -0.36    0.99
  -1   0 -15  546.66   19.53
  -1   0 -15  556.52   18.35
  -1   0 -16    1.02    1.41
  -1   0 -16    0.41    1.27
  -1   0 -17  583.44   20.83
  -1   0 -17  556.92   19.31
  -1   0 -18   10.27    2.69
  -1   0 -18    0.93    1.50
  -1   0 -19  935.98   30.51
  -1   0 -19  958.65   28.94
  -1   0 -20    3.16    2.26
  -1   0 -20    3.64    2.10
  -1   0 -21  604.46   22.55
  -1   0 -21  592.14   20.81
  -1   0 -22    1.39    2.03
  -1   0 -22    1.11    0.96
  -1   0 -22    0.57    1.67
  -1   0 -23   78.34    4.79
  -1   0 -23   86.26    8.12
  -1   0 -24   -0.76    1.85
  -1   0 -24    0.26    1.15
  -1   0 -24    2.45    1.96
  -1   0 -25  110.06    9.32
  -1   0 -25  119.89    8.72
  -1   0 -25  106.54    5.32
  -1   0 -26    1.63    2.61
  -1   0 -26    1.21    1.13
  -1   0 -26    2.62    2.42
  -1   0 -27  380.82   18.31
  -1   0 -27  396.60   16.82
  -1   0 -28    4.34    3.41
  -1   0 -28    2.07    2.63
  -1   0 -29  688.92   27.89
  -1   0 -29  685.97   25.49
  -1   0 -30    6.43    3.40
  -1   0 -31    1.89    2.61
   1   1 -32   53.63    7.31
   1  -1 -32   51.44    7.16
   1   1 -31  222.07   14.47
   1   1 -31  217.50   14.63
   1  -1 -31  216.63   14.34
   1   1 -30    5.08    3.03
   1   1 -30   10.04    3.96
   1  -1 -30    5.20    3.00
   1   1 -29  331.09   17.48
   1  -1 -29  355.45   19.63
   1   1 -29  314.99   17.68
   1  -1 -29  370.04   18.49
   1  -1 -28  110.01   10.62
   1   1 -28  111.14    9.74
   1   1 -28  109.80   10.04
   1  -1 -28  121.88   10.31
   1   1 -27  121.38    9.95
   1  -1 -27  140.17   11.61
   1   1 -27  121.34   10.22
   1  -1 -27  135.48   10.56
   1   1 -26  198.84   12.45
   1  -1 -26  209.71   13.99
   1   1 -26  195.79   13.03
   1  -1 -26  173.95   12.01
   1   1 -25  272.82   14.75
   1  -1 -25  310.25   17.09
   1   1 -25  298.16   16.05
   1  -1 -25  283.42   15.36
   1  -1 -24   24.18    4.87
   1  -1 -24   17.99    4.00
   1   1 -24   15.95    4.06
   1  -1 -23  106.22    9.33
   1   1 -23  102.08    8.99
   1  -1 -23   94.27    8.27
   1  -1 -22  145.63   10.90
   1   1 -22  139.53   10.27
   1  -1 -22  141.09   10.01
   1  -1 -21 1215.15   39.57
   1   1 -21 1182.15   38.61
   1  -1 -21 1284.39   38.50
   1  -1 -20  703.72   27.14
   1   1 -20  760.18   27.03
   1  -1 -20  734.28   26.12
   1  -1 -19    8.77    3.03
   1   1 -19    9.44    2.80
   1  -1 -19   14.65    3.28
   1  -1 -18  422.58   18.62
   1   1 -18  397.91   17.66
   1  -1 -18  401.08   17.32
   1  -1 -17  220.65   12.61
   1   1 -17  207.67   11.82
   1  -1 -17  219.69   11.83
   1  -1 -16  613.09   22.84
   1   1 -16  596.55   22.11
   1  -1 -16  583.12   21.70
   1  -1 -15 1384.49   40.49
   1   1 -15 1360.66   39.73
   1  -1 -14  158.71    9.81
   1   1 -14  160.56    9.55
   1  -1 -13  753.36   25.04
   1   1 -13  725.43   24.32
   1  -1 -12  583.31   20.45
   1   1 -12  545.70   19.40
  -1  -1  12  543.40   18.95
   1  -1 -11   79.96    6.20
   1   1 -11   85.68    6.17
  -1  -1  11   75.36    5.63
   1  -1 -10  829.62   25.95
  -1  -1  10  796.41   24.55
   1   1  -9 1881.20   47.90
   1   1  -8   46.03    3.97
   1  -1  -7 2781.54   67.40
   1   1  -7 2959.24   68.46
  -1   1   7 2873.11   63.73
   1  -1  -6   48.17    3.57
   1   1  -6   58.47    4.11
  -1   1   6   58.31    2.63
   1  -1  -5 8339.15  179.59
  -1   1   5 7853.73  177.20
   1   1  -5 8459.53  180.36
   1  -1  -4 1775.04   43.17
   1   1  -4 1844.03   43.87
   1  -1  -3  310.99   10.07
  -1   1   3  309.73    9.93
   1   1  -3  311.25   10.31
  -1   1   2  531.64   14.75
   1   1  -2  571.18   15.50
  -1   1   1   49.95    2.71
   1   1  -1   50.12    3.03
  -1   1   0  515.45   13.08
  -1  -1   0  500.78   13.94
  -1   1  -1 6817.90  148.11
  -1  -1  -1 6725.47  149.57
   1   1   2 2311.48   56.18
  -1  -1  -2 2494.88   55.21
   1   1   3  184.73    7.32
  -1   1  -3  191.38    6.67
  -1  -1  -4   68.01    4.19
  -1   1  -4   60.91    3.44
  -1  -1  -5  747.30   21.26
  -1   1  -5  757.23   19.85
  -1  -1  -6 7806.86  176.54
  -1   1  -6 8109.72  174.74
   1  -1   6 7857.05  174.37
   1   1   6 7859.00  172.32
  -1  -1  -7 1733.40   43.92
   1  -1   7 1745.30   41.81
  -1   1  -7 1747.92   42.21
   1   1   7 1750.15   39.38
  -1  -1  -8  355.22   13.35
  -1   1  -8  356.81   11.98
   1  -1   8  367.23   11.69
  -1  -1  -9 2561.04   62.77
  -1   1  -9 2580.99   60.84
   1  -1   9 2534.82   60.21
  -1  -1 -10    1.68    1.23
  -1   1 -10    1.23    0.75
   1  -1  10    4.43    1.23
  -1  -1 -11  602.57   20.53
  -1   1 -11  601.39   18.83
   1  -1  11  615.86   18.41
  -1  -1 -12  843.28   27.04
  -1   1 -12  870.86   25.09
   1  -1  12  886.83   24.74
  -1  -1 -13 1004.56   30.79
  -1   1 -13  969.59   28.96
   1  -1  13 1043.89   28.36
  -1  -1 -14    4.46    1.86
  -1   1 -14   -0.42    0.86
   1  -1  14    2.29    1.22
  -1  -1 -15  402.76   17.37
  -1   1 -15  443.69   16.05
   1  -1  15  414.08   15.41
  -1   1 -16    0.42    1.22
  -1  -1 -16   -0.63    1.29
  -1   1 -16    1.42    1.31
  -1  -1 -16    0.88    1.15
  -1  -1 -17 1301.65   39.50
  -1   1 -17 1253.37   36.05
  -1   1 -17 1335.77   37.05
  -1  -1 -17 1297.57   36.19
  -1   1 -18  410.57   16.20
  -1  -1 -18  410.79   18.54
  -1   1 -18  437.66   17.03
  -1  -1 -18  424.30   16.24
  -1   1 -19   11.29    2.57
  -1   1 -19    8.80    2.60
  -1  -1 -19    9.45    2.44
  -1   1 -20  405.91   16.50
  -1  -1 -20  373.52   18.21
  -1   1 -20  382.89   16.45
  -1  -1 -20  399.34   16.08
  -1  -1 -21    9.35    3.22
  -1   1 -21    6.33    2.66
  -1   1 -21    7.17    2.53
  -1  -1 -21    7.05    2.41
  -1   1 -22  122.97    8.67
  -1  -1 -22  119.00    9.87
  -1   1 -22  114.85    8.41
  -1  -1 -22   93.03    7.34
  -1   1 -23 1100.41   34.46
  -1  -1 -23 1105.75   37.21
  -1   1 -23 1108.73   34.57
  -1  -1 -23 1065.99   33.25
  -1  -1 -24    4.35    3.41
  -1   1 -24    1.31    1.82
  -1   1 -24    3.97    2.73
  -1  -1 -24   -0.60    1.68
  -1   1 -25  366.62   16.88
  -1  -1 -25  342.75   18.54
  -1   1 -25  348.30   16.61
  -1  -1 -25  350.71   15.97
  -1  -1 -26   21.35    5.01
  -1   1 -26   18.52    3.86
  -1   1 -26   21.14    3.98
  -1  -1 -26   12.85    3.27
  -1   1 -27   70.27    7.37
  -1  -1 -27   59.33    7.79
  -1   1 -27   68.11    7.19
  -1  -1 -27   65.35    6.78
  -1   1 -28  137.75   10.49
  -1  -1 -28  134.75   11.70
  -1   1 -28  129.98    9.93
  -1  -1 -28  129.25    9.54
  -1  -1 -29  179.33   13.64
  -1   1 -29  165.24   11.89
  -1  -1 -29  174.55   11.25
  -1   1 -29  171.07   11.47
  -1   1 -30    3.26    2.50
  -1  -1 -30    4.13    3.16
   1   2 -31   20.01    4.99
   1  -2 -31   10.95    4.14
   1   2 -30  185.93   12.38
   1   2 -30  186.43   13.80
   1  -2 -30  185.68   13.24
   1   2 -29    0.74    2.16
   1   2 -29    2.92    2.99
   1  -2 -29    0.88    1.99
   1  -2 -28  225.12   15.59
   1   2 -28  227.12   13.29
   1   2 -28  247.94   15.60
   1  -2 -28  264.52   15.32
   1  -2 -27   43.94    6.95
   1  -2 -27   31.95    6.27
   1   2 -27   31.04    5.82
   1  -2 -27   40.48    5.93
   1  -2 -26   69.72    8.55
   1   2 -26   62.72    7.79
   1  -2 -26   61.91    7.21
   1  -2 -25    7.12    3.26
   1   2 -25    9.03    3.34
   1  -2 -25    9.70    3.08
   1  -2 -24  413.58   21.22
   1   2 -24  391.87   19.68
   1  -2 -24  408.84   19.23
   1  -2 -23   78.16    8.78
   1   2 -23   96.39    9.21
   1  -2 -23   77.92    7.86
   1  -2 -22 1505.00   47.14
   1   2 -22 1380.48   44.73
   1  -2 -22 1429.56   44.10
   1  -2 -21  262.01   15.85
   1   2 -21  271.04   15.19
  -1  -2  21  256.68   14.25
   1  -2 -20   34.31    5.50
   1   2 -20   31.06    4.99
  -1  -2  20   34.82    5.20
   1  -2 -19    7.65    2.94
   1   2 -19    3.09    2.02
  -1  -2  19    5.98    2.61
   1  -2 -18   49.20    6.40
   1   2 -18   38.15    5.34
  -1  -2  18   41.37    5.24
   1  -2 -17  202.70   11.88
   1  -2 -17  187.11   12.44
   1   2 -17  184.06   11.80
  -1  -2  17  191.24   11.10
   1  -2 -16 1613.95   45.73
   1  -2 -16 1639.74   47.90
   1   2 -16 1582.15   46.46
  -1  -2  16 1550.37   44.72
   1  -2 -15   49.60    5.47
   1  -2 -15   58.04    6.46
   1   2 -15   57.28    6.10
  -1  -2  15   51.21    5.33
   1  -2 -14 1854.76   50.97
   1  -2 -14 1906.94   53.43
   1   2 -14 1929.53   52.55
  -1  -2  14 1902.33   51.04
   1  -2 -13  151.58    9.16
   1   2 -13  159.92   10.00
   1  -2 -13  178.63   10.90
   1  -2 -12 1740.85   47.29
   1   2 -12 1824.18   49.06
   1  -2 -11 1001.92   28.86
   1   2 -11  977.45   29.93
  -1   2  11  934.70   22.46
  -1   2  10    3.19    0.85
   1  -2 -10    3.79    1.40
   1   2 -10    4.64    1.85
  -1   2   9  196.12    6.77
   1  -2  -9  190.00    9.28
   1   2  -9  192.83   10.08
   1  -2  -8 1504.38   39.94
   1   2  -8 1558.87   41.62
  -1   2   8 1546.99   41.30
   1  -2  -7   77.09    5.23
   1   2  -7   69.77    5.59
  -1   2   7   89.33    5.92
  -1   2   6 2879.65   66.07
   1  -2  -6 2834.89   66.65
   1   2  -6 2706.01   68.27
  -1   2   6 2742.61   67.75
  -1   2   5  282.98   10.53
   1   2  -5  285.59   11.79
  -1   2   5  296.34   11.69
  -1   2   4  167.07    7.41
   1   2  -4  165.90    8.32
  -1   2   4  172.70    8.02
  -1   2   3  365.99   12.39
   1   2  -3  370.33   13.46
  -1   2   3  374.33   12.84
   1   2  -2  803.06   23.43
  -1   2   2  814.62   22.52
  -1   2   1  317.67   10.66
   1  -2  -1  294.82   10.56
  -1  -2   0 5297.01  118.73
   1  -2   0 5196.63  117.49
  -1   2   0 5172.06  117.38
  -1  -2  -1  130.20    6.66
   1   2   1  122.97    6.79
  -1   2  -1  136.89    5.94
   1   2   2 1921.12   44.26
  -1  -2  -2 1884.51   47.74
   1   2   2 1892.91   48.62
   1   2   3  125.52    4.47
   1   2   3  135.01    7.16
  -1   2  -3  121.33    5.49
   1   2   4  922.44   26.52
  -1  -2  -5  958.94   23.68
  -1   2  -5  942.99   26.67
   1   2   5  944.07   27.47
  -1  -2  -6 1991.26   46.62
  -1   2  -6 2074.13   49.87
   1  -2   6 1928.36   49.18
   1   2   6 1928.38   50.36
  -1  -2  -7   44.64    3.17
  -1   2  -7   44.05    4.02
   1  -2   7   44.73    3.92
   1   2   7   46.44    4.38
  -1  -2  -8 1321.11   33.13
  -1   2  -8 1333.79   35.73
   1  -2   8 1273.98   34.87
  -1  -2  -9   33.58    4.16
  -1   2  -9   25.44    3.19
   1  -2   9   32.40    3.41
  -1  -2 -10 1641.57   44.93
  -1   2 -10 1589.46   42.56
   1  -2  10 1592.29   41.82
  -1  -2 -11   56.32    5.68
  -1   2 -11   68.00    5.45
   1  -2  11   52.49    4.59
   1   2  11   56.35    2.35
  -1  -2 -12  378.82   16.61
   1  -2  12  365.46   14.28
  -1   2 -12  386.04   15.14
  -1  -2 -13  244.79   13.01
  -1   2 -13  225.89   11.27
   1   2  14 1471.15   42.02
  -1  -2 -14 1430.48   43.34
  -1   2 -14 1496.33   41.19
  -1  -2 -15    7.11    2.63
  -1   2 -15    3.27    1.75
  -1  -2 -16 1353.24   42.34
  -1   2 -16 1374.20   39.64
  -1  -2 -17  318.02   16.80
  -1   2 -17  336.25   15.18
   1  -2  17  321.77   14.08
  -1  -2 -18  657.43   26.27
  -1   2 -18  648.09   23.71
   1  -2  18  660.85   22.72
  -1  -2 -19  354.28   18.22
  -1   2 -19  377.25   16.63
   1  -2  19  326.88   14.84
  -1  -2 -20   22.06    4.71
  -1   2 -20   20.98    3.89
   1  -2  20   30.09    4.21
  -1  -2 -21   78.40    8.57
  -1   2 -21   78.98    7.39
   1  -2  21   65.90    6.34
  -1   2 -22  320.41   14.14
  -1  -2 -22  297.65   17.40
  -1   2 -22  337.41   16.34
  -1  -2 -22  331.24   15.30
  -1   2 -23   19.35    3.41
  -1  -2 -23   14.52    4.02
  -1   2 -23   16.89    3.80
  -1  -2 -23   16.61    3.66
  -1  -2 -24  270.16   16.66
  -1   2 -24  250.58   12.85
  -1   2 -24  278.77   14.91
  -1  -2 -24  265.28   13.86
  -1  -2 -25   41.87    6.66
  -1   2 -25   39.49    5.06
  -1   2 -25   39.19    5.83
  -1  -2 -25   36.56    5.13
  -1  -2 -26  238.47   16.12
  -1   2 -26  247.44   12.96
  -1   2 -26  234.81   13.87
  -1  -2 -26  229.26   13.02
  -1   2 -27    4.55    2.17
  -1  -2 -27    5.39    3.15
  -1   2 -27    7.17    2.76
  -1  -2 -27    3.48    2.49
  -1   2 -28   67.16    6.94
  -1  -2 -28   61.86    8.53
  -1   2 -28   67.22    7.42
  -1  -2 -28   60.36    6.61
  -1   2 -29   25.45    4.82
  -1  -2 -29   18.03    4.19
   1   3 -30   23.33    5.47
   1  -3 -30   14.46    4.56
   1   3 -29   10.51    4.13
   1  -3 -29   13.36    3.85
   1   3 -28  102.05   10.44
   1  -3 -28  113.54   10.42
   1  -3 -27    2.11    3.52
   1   3 -27    6.17    3.30
   1  -3 -27    9.35    3.46
   1  -3 -26  762.31   31.10
   1   3 -26  746.05   30.93
   1  -3 -26  746.77   30.09
   1  -3 -25  149.19   12.46
   1  -3 -25  151.24   13.30
   1   3 -25  150.36   12.61
  -1  -3  25  156.99   11.97
   1  -3 -24   54.07    7.27
   1  -3 -24   52.05    7.82
   1   3 -24   44.41    6.84
  -1  -3  24   47.54    6.83
   1  -3 -23   61.92    8.42
   1   3 -23   61.20    7.80
  -1  -3  23   58.17    7.08
   1  -3 -22   20.51    4.53
   1  -3 -22   15.09    4.79
   1   3 -22   13.35    4.05
  -1  -3  22   20.66    4.30
   1  -3 -21  103.20    9.41
   1  -3 -21   83.06    9.54
   1   3 -21   93.58    9.29
  -1  -3  21   98.08    8.74
   1  -3 -20  722.46   27.55
   1  -3 -20  701.97   29.79
   1   3 -20  742.80   28.98
  -1  -3  20  688.12   26.44
   1  -3 -19    6.21    3.05
   1  -3 -19    7.93    3.31
   1   3 -19    9.69    3.73
  -1  -3  19    8.76    2.87
   1  -3 -18  993.11   33.66
   1  -3 -18 1053.09   37.36
   1   3 -18  979.52   34.98
  -1  -3  18 1028.40   33.81
   1  -3 -17   49.93    6.03
   1  -3 -17   56.22    7.27
   1   3 -17   55.30    6.83
  -1  -3  17   55.66    6.26
   1  -3 -16 1017.36   33.15
   1  -3 -16 1029.73   36.34
   1   3 -16 1009.94   34.89
  -1  -3  16 1048.78   33.51
   1  -3 -15    3.15    1.84
   1  -3 -15   -0.84    1.56
   1   3 -15   -0.77    1.88
  -1  -3  15   -0.65    1.58
   1  -3 -14  593.32   21.69
   1  -3 -14  560.67   23.58
   1   3 -14  587.41   23.34
  -1  -3  14  591.92   22.06
  -1   3  14  553.13   14.32
   1  -3 -13  102.37    7.58
   1  -3 -13   93.12    8.43
  -1  -3  13  106.74    8.02
   1   3 -13   85.43    7.79
  -1   3  13   99.93    4.46
   1  -3 -12  528.82   19.79
   1   3 -12  526.11   21.51
  -1  -3  12  542.03   20.77
   1  -3 -12  570.95   22.64
   1  -3 -11   43.80    4.85
  -1  -3  11   42.50    4.99
   1   3 -11   43.38    5.28
  -1   3  11   48.03    5.35
   1  -3 -10 2401.83   59.27
   1   3 -10 2361.00   62.09
  -1  -3  10 2180.80   59.99
  -1   3  10 2299.60   60.94
   1  -3  -9  395.32   15.54
   1   3  -9  412.08   17.52
  -1   3   9  416.33   17.05
   1   3  -8  181.41   10.70
  -1   3   8  188.89   10.46
  -1   3   7  830.37   24.38
   1   3  -7  827.16   27.39
  -1   3   7  829.46   26.70
  -1   3   6  101.28    6.24
   1   3  -6  100.44    7.55
  -1   3   6  108.41    7.35
  -1   3   5  215.15    9.97
   1   3  -5  238.80   11.76
  -1   3   5  244.03   11.29
  -1   3   4 1939.42   50.17
   1   3  -4 2069.52   52.84
   1  -3  -4 2057.65   52.22
  -1   3   4 1924.10   51.18
   1   3  -3    1.01    1.32
  -1   3   3    1.27    1.18
   1  -3  -3    0.45    1.11
  -1   3   3    4.04    1.27
  -1   3   2 2030.47   51.24
   1  -3  -2 1997.67   51.76
  -1   3   1    4.64    1.48
  -1   3   0   37.77    3.78
   1   3   0   43.41    4.49
  -1  -3  -1  121.03    7.71
  -1   3  -1  131.35    7.14
   1   3   1  136.95    8.24
  -1  -3  -2 1256.57   35.31
  -1   3  -2 1222.12   33.24
   1   3   2 1260.66   35.60
   1   3   3  229.93    8.12
  -1  -3  -3  241.55   11.32
   1   3   3  224.58   11.24
  -1   3  -3  229.62    9.71
   1   3   4 1145.08   28.05
  -1  -3  -4 1120.02   32.70
   1   3   4 1071.60   32.95
  -1   3  -4 1131.94   30.43
   1   3   5   10.38    2.41
  -1   3  -5   13.36    2.21
   1   3   6 2780.56   70.26
   1   3   7  646.01   22.78
  -1   3  -8    1.62    1.22
   1   3   8    1.13    1.17
  -1  -3  -8    2.37    1.06
  -1  -3  -9  184.80    8.36
  -1   3  -9  195.57   10.75
   1   3   9  170.62   10.45
  -1  -3 -10  756.66   22.25
  -1   3 -10  729.87   25.24
  -1  -3 -10  753.57   26.93
   1   3  10  736.05   25.74
  -1  -3 -11   63.38    4.83
  -1   3 -11   55.73    5.71
   1  -3  11   62.92    5.68
   1   3  11   41.51    5.46
  -1  -3 -11   43.20    5.57
  -1  -3 -12 3622.07   87.08
   1  -3  12 3615.82   89.43
  -1   3 -12 3688.40   91.03
  -1  -3 -12 3784.82   93.67
  -1  -3 -13   54.04    4.92
  -1  -3 -13   44.61    6.11
  -1   3 -13   49.22    5.59
   1  -3  13   59.00    5.62
  -1  -3 -14  172.31    9.33
  -1  -3 -14  181.69   12.05
   1  -3  14  185.86   10.32
  -1   3 -14  183.45   10.97
   1   3  14  148.31    4.60
  -1  -3 -15  115.37    7.85
  -1  -3 -15  123.03   10.19
  -1   3 -15  140.07    9.73
   1  -3  15  132.59    8.84
  -1  -3 -16  118.36    8.13
  -1  -3 -16  129.28   10.64
  -1   3 -16  110.71    8.86
   1  -3  16  128.10    8.75
  -1  -3 -17  164.50   10.03
  -1  -3 -17  144.55   11.46
  -1   3 -17  150.11   10.59
   1  -3  17  157.99    9.94
  -1  -3 -18  398.85   16.96
  -1   3 -18  373.95   17.73
   1  -3  18  367.57   16.54
  -1  -3 -19    6.69    2.62
  -1   3 -19    3.85    2.14
   1  -3  19    4.47    2.21
  -1  -3 -20  349.33   16.92
  -1  -3 -20  409.79   21.16
  -1   3 -20  382.71   18.47
   1  -3  20  381.12   17.08
  -1  -3 -21   23.74    4.30
  -1  -3 -21   26.61    5.49
  -1   3 -21   22.81    4.54
   1  -3  21   16.08    3.48
  -1  -3 -22  274.62   15.21
  -1  -3 -22  305.50   18.56
  -1   3 -22  273.53   15.72
   1  -3  22  289.23   14.79
  -1  -3 -23   10.57    3.37
  -1   3 -23   10.25    3.36
   1  -3  23   14.14    3.47
  -1  -3 -24  270.85   15.61
  -1  -3 -24  277.24   18.23
  -1   3 -24  293.36   16.23
   1  -3  24  280.73   14.98
  -1  -3 -25   21.72    4.82
  -1   3 -25   15.89    3.47
  -1  -3 -25   10.54    4.06
  -1   3 -25   14.09    4.00
   1  -3  25   11.28    3.20
  -1  -3 -26   89.52    9.10
  -1   3 -26  101.61    7.76
  -1   3 -26   95.53    9.27
  -1  -3 -26   92.40    8.80
  -1  -3 -27   13.85    4.44
  -1   3 -27   11.75    3.65
  -1  -3 -27   17.26    3.92
  -1  -3 -28  592.62   26.15
  -1   3 -28  617.06   26.18
  -1  -3 -28  595.18   24.42
   1  -4 -27  541.46   25.67
   1   4 -27  489.86   25.28
   1  -4 -26   54.79    7.82
   1   4 -26   53.58    8.11
  -1  -4  26   55.19    7.29
   1  -4 -25  147.79   12.37
   1   4 -25  134.51   12.30
  -1  -4  25  123.43   11.13
   1  -4 -24   12.80    4.37
   1   4 -24   12.32    4.52
  -1  -4  24   18.20    4.54
   1  -4 -23   81.61    9.09
   1   4 -23  109.77   11.17
  -1  -4  23   98.97    9.58
   1  -4 -22  575.44   25.15
   1  -4 -22  568.77   27.98
   1   4 -22  537.51   26.16
  -1  -4  22  615.45   25.42
   1  -4 -21  194.45   13.18
   1  -4 -21  179.71   14.68
   1   4 -21  187.01   14.46
  -1  -4  21  207.19   13.51
   1  -4 -20   64.57    7.55
   1  -4 -20   61.30    8.38
   1   4 -20   58.12    7.84
  -1  -4  20   59.63    7.35
   1  -4 -19  302.38   16.15
   1  -4 -19  321.29   19.13
   1   4 -19  283.13   17.37
  -1  -4  19  284.40   15.96
   1  -4 -18    1.53    1.88
   1  -4 -18    2.15    2.22
   1   4 -18   -0.99    2.42
  -1  -4  18    0.81    1.97
   1  -4 -17  313.44   16.00
   1  -4 -17  306.56   18.32
   1   4 -17  324.65   18.17
  -1  -4  17  329.76   17.05
   1  -4 -16  210.03   12.35
   1   4 -16  216.82   14.38
  -1   4  16  196.64    6.83
  -1  -4  16  207.54   13.07
  -1   4  15   15.72    2.03
   1  -4 -15   22.71    4.02
   1   4 -15   16.54    4.34
  -1  -4  15   14.58    3.49
   1   4 -14   25.02    5.18
  -1  -4  14   22.49    4.24
  -1  -4  13  385.71   17.90
   1   4 -13  361.88   18.73
  -1   4  13  366.25   17.76
  -1  -4  12  751.09   26.97
   1   4 -12  721.23   28.00
  -1   4  12  683.65   26.44
  -1  -4  11 1822.39   52.00
   1   4 -11 1819.34   53.56
  -1   4  11 1808.06   52.10
   1   4 -10  197.52   12.65
  -1  -4  10  185.69   11.75
  -1   4  10  205.84   12.18
   1   4  -9   64.80    7.03
  -1   4   9   74.75    7.06
   1  -4  -9   71.47    7.21
  -1   4   8  568.60   19.67
   1   4  -8  624.73   24.06
   1  -4  -8  597.98   23.38
  -1   4   8  580.69   22.44
  -1   4   7  387.20   15.16
   1   4  -7  404.58   18.39
  -1   4   7  398.98   17.40
   1  -4  -7  414.59   18.25
  -1   4   6  754.39   23.97
   1   4  -6  776.30   27.57
  -1   4   6  746.80   26.10
   1  -4  -6  776.97   27.13
  -1   4   5 1534.10   40.60
  -1   4   5 1500.68   42.79
   1  -4  -5 1539.08   43.86
  -1   4   4   25.45    3.39
  -1  -4   4   27.56    4.32
  -1   4   4   33.41    4.30
   1  -4  -4   32.37    4.61
  -1   4   3 1257.00   34.77
  -1  -4   3 1264.31   37.72
   1   4  -3 1186.35   36.68
  -1   4   3 1181.58   36.01
  -1  -4   2    1.90    1.65
  -1   4   2    5.32    1.84
   1   4  -2   -0.60    1.75
   1  -4  -1  780.28   27.48
  -1  -4   1  790.84   27.50
  -1   4   1  824.02   26.28
   1   4  -1  817.32   27.37
  -1  -4   0  270.23   13.49
   1  -4   0  223.98   12.57
  -1   4   0  231.66   11.63
   1   4   0  260.24   13.05
  -1  -4  -1    3.20    1.78
   1   4   1    4.30    1.88
  -1   4  -1    4.39    1.91
   1   4   2  415.47   13.99
  -1  -4  -2  427.61   18.25
  -1   4  -2  441.80   16.65
   1   4   2  423.89   18.09
   1   4   3  603.46   17.85
  -1  -4  -3  577.38   22.42
   1   4   3  602.29   22.55
  -1   4  -3  580.03   20.32
   1   4   4   86.53    5.03
  -1  -4  -4   79.51    7.17
   1   4   4   77.28    7.00
  -1   4  -4   94.72    6.60
   1   4   5 1058.55   27.79
   1   4   5 1063.58   34.05
  -1   4  -5 1117.42   31.36
   1  -4   5 1038.89   33.34
  -1  -4  -5 1030.23   33.60
   1   4   6  781.06   27.72
  -1   4  -6  773.65   24.62
  -1  -4  -6  810.55   27.69
   1  -4   6  804.06   27.22
  -1   4  -7  813.00   25.36
   1   4   7  801.26   28.42
   1  -4   7  850.28   28.18
   1   4   8  427.24   18.78
  -1   4  -8  413.45   15.81
   1  -4   8  422.49   18.08
   1   4   9   66.65    6.76
   1  -4   9   63.08    6.48
   1   4  10  748.69   27.22
  -1  -4 -10  665.54   27.33
   1  -4  10  739.21   25.99
   1   4  11  698.45   26.67
  -1  -4 -11  704.85   28.23
   1  -4  11  712.45   25.58
  -1  -4 -12   29.73    5.49
   1   4  12   33.44    5.15
   1  -4  12   24.60    4.17
  -1   4 -12   31.09    5.09
   1   4  13  647.35   25.71
  -1  -4 -13  650.98   27.09
   1  -4  13  629.98   24.05
  -1   4 -13  623.13   25.09
  -1  -4 -14   38.12    4.56
  -1  -4 -14   34.50    5.92
   1   4  14   41.00    5.85
  -1   4 -14   36.69    5.52
   1  -4  14   31.58    4.77
  -1  -4 -15   53.81    5.36
  -1  -4 -15   62.26    7.74
   1  -4  15   59.92    6.59
  -1   4 -15   61.16    7.22
  -1  -4 -16  601.34   20.40
  -1  -4 -16  581.35   25.50
  -1   4 -16  565.91   23.27
   1  -4  16  605.02   22.35
  -1  -4 -17  162.45   10.03
  -1  -4 -17  144.68   12.35
   1  -4  17  130.10    9.86
  -1   4 -17  142.91   11.09
  -1  -4 -18   41.36    5.32
  -1  -4 -18   53.47    7.87
  -1   4 -18   47.26    6.60
   1  -4  18   51.07    6.19
  -1  -4 -19  520.02   20.99
  -1  -4 -19  557.14   26.38
  -1   4 -19  502.35   23.10
   1  -4  19  532.56   22.01
  -1  -4 -20   50.28    6.20
  -1  -4 -20   53.44    8.11
  -1   4 -20   48.53    6.86
   1  -4  20   52.05    6.41
  -1  -4 -21  295.63   15.60
  -1  -4 -21  307.69   19.45
  -1   4 -21  261.91   16.20
   1  -4  21  323.28   16.30
  -1  -4 -22   12.57    3.49
  -1  -4 -22   14.81    4.57
  -1   4 -22   10.50    4.05
   1  -4  22   22.70    4.58
  -1  -4 -23  112.70    9.82
  -1   4 -23  128.40   11.10
   1  -4  23  125.60   10.22
  -1  -4 -24  157.16   11.99
  -1   4 -24  163.81   12.82
   1  -4  24  164.02   11.94
  -1  -4 -25  128.03   11.10
  -1   4 -25  149.13   12.20
   1  -4  25  157.56   11.62
  -1  -4 -26    1.86    2.43
  -1   4 -26   -1.00    2.44
   1  -4  26    3.35    2.32
  -1   4 -27  123.47   11.33
   1  -4  27  136.71   11.13
   1  -4  28   39.35    6.21
   1   5 -23  182.50   15.10
   1   5 -22   22.91    5.81
   1   5 -21  403.45   22.65
  -1  -5  21  403.50   20.83
   1   5 -20    6.97    3.56
  -1  -5  20    2.83    3.14
   1   5 -19    9.11    3.94
  -1  -5  19   13.96    3.95
  -1   5  18    0.68    0.80
   1   5 -18    3.35    2.73
  -1  -5  18    2.76    2.25
   1   5 -17  214.18   15.37
  -1  -5  17  234.28   14.72
  -1   5  17  194.93    7.84
  -1   5  16    8.10    1.91
   1   5 -16    8.56    3.70
  -1  -5  16    4.52    2.77
  -1  -5  15  890.13   33.09
   1   5 -15  922.88   35.53
   1  -5 -14   43.76    6.84
   1   5 -14   69.50    8.37
  -1  -5  14   57.90    7.30
  -1   5  13  120.17   10.35
   1  -5 -13  143.88   11.97
   1   5 -13  112.87   10.72
  -1  -5  13  137.76   10.88
   1  -5 -12    0.98    2.21
  -1   5  12   -0.84    1.91
   1   5 -12    0.98    2.22
  -1  -5  12    2.56    2.09
  -1  -5  11  164.76   11.69
   1   5 -11  140.39   11.56
  -1   5  11  156.10   11.38
   1  -5 -11  143.91   11.67
  -1  -5  10   10.84    3.45
  -1   5  10    6.46    2.69
   1  -5 -10    2.75    2.55
  -1   5   9  924.24   32.62
   1  -5  -9  936.98   33.98
  -1   5   8  104.91    7.36
   1  -5  -8  130.32   10.45
  -1   5   8  121.35    9.61
  -1   5   7 1006.05   30.63
  -1   5   7 1023.20   34.17
  -1   5   6  222.82   11.40
   1   5  -6  218.35   13.01
  -1   5   6  241.46   13.65
  -1   5   5  530.27   19.46
  -1  -5   5  483.65   21.67
  -1   5   5  526.97   21.53
   1   5  -5  543.84   21.99
  -1   5   4   32.65    4.35
  -1  -5   4   37.35    5.59
   1  -5  -4   34.30    5.44
  -1   5   4   36.01    5.21
   1   5  -4   34.79    5.07
  -1   5   3  370.48   15.63
  -1  -5   3  340.57   17.59
   1  -5  -3  366.93   18.25
  -1   5   3  358.01   16.79
   1   5  -3  400.17   18.14
  -1  -5   2  145.19   10.67
   1  -5  -2  139.38   10.70
   1   5  -2  139.38   10.23
  -1   5   2  154.83   10.25
   1  -5  -1  425.09   20.00
  -1  -5   1  436.24   20.07
   1   5  -1  450.35   19.87
  -1   5   1  459.40   19.04
   1  -5   0    0.80    2.22
  -1  -5   0    2.39    2.08
   1   5   0    0.75    2.07
  -1   5   0    0.64    1.76
  -1  -5  -1 2306.00   62.73
  -1   5  -1 2161.94   59.22
   1   5   1 2201.19   61.40
   1   5   2   53.66    4.55
  -1  -5  -2   40.47    5.94
   1   5   2   62.12    6.84
  -1   5  -2   51.35    5.73
   1   5   3  283.39   11.29
  -1  -5  -3  277.45   15.73
   1   5   3  278.96   15.16
  -1   5  -3  261.30   13.42
   1   5   4    9.88    2.01
  -1  -5  -4   12.23    3.46
   1   5   4   17.16    3.75
  -1   5  -4   12.40    2.90
   1   5   5    1.94    1.08
   1   5   5    1.58    1.79
  -1   5  -5    2.91    1.94
   1  -5   5    0.78    1.77
   1   5   6    3.20    2.34
  -1   5  -6    4.61    2.06
  -1  -5  -6    5.73    2.73
   1  -5   6    6.25    2.50
   1   5   7  601.47   24.98
  -1   5  -7  617.80   22.20
   1  -5   7  627.42   24.93
  -1  -5  -7  628.53   25.43
   1   5   8   90.19    8.61
  -1   5  -8   90.63    7.18
  -1  -5  -8   86.19    8.52
   1  -5   8   79.78    7.88
   1   5   9  185.19   12.71
  -1   5  -9  183.92   10.43
   1  -5   9  194.25   12.52
  -1  -5  -9  193.51   12.75
  -1   5 -10    2.23    1.71
   1   5  10    5.96    2.72
  -1  -5 -10    2.53    2.20
   1  -5  10    2.40    2.45
   1   5  11  318.63   17.39
  -1   5 -11  344.24   14.94
   1  -5  11  330.16   17.13
   1   5  12    6.18    3.06
  -1   5 -12    2.79    1.71
   1   5  13  402.04   20.20
   1  -5  13  426.99   19.86
   1   5  14   54.46    7.30
   1  -5  14   64.78    7.42
   1   5  15  545.10   24.57
  -1  -5 -15  524.01   26.04
   1  -5  15  550.14   23.49
   1   5  16    3.82    2.64
  -1  -5 -16   -1.16    2.41
   1  -5  16    0.83    2.18
   1   5  17  563.17   25.26
  -1  -5 -17  521.41   26.48
   1  -5  17  536.73   23.49
  -1  -5 -18    1.23    2.55
   1  -5  18    0.85    2.09
  -1  -5 -19   13.97    4.85
   1  -5  19   16.34    4.14
   1  -5  20  112.17   10.09
   1  -5  21    7.84    3.12
   1  -5  22   37.00    5.98
   1  -5  23  765.86   29.94
  -1   6  18    6.33    1.69
  -1   6  17  250.45   10.62
  -1  -6  15   15.20    4.40
  -1   6  14   55.45    7.50
   1  -6 -14   50.24    8.07
  -1  -6  14   41.17    6.64
  -1   6  13   31.15    5.82
  -1  -6  13   54.72    7.52
  -1  -6  12   15.79    4.38
  -1   6  12   14.30    4.50
  -1  -6  11  521.62   23.97
  -1   6  11  445.26   22.31
   1   6 -11  505.67   22.23
  -1  -6  10   70.97    8.56
   1   6 -10   75.21    8.00
  -1   6  10   67.40    8.24
  -1  -6   9  118.16   10.90
   1  -6  -9  133.53   11.57
  -1   6   9  146.02   11.76
   1   6  -9  139.99   10.93
  -1   6   8  364.16   15.91
   1  -6  -8  395.06   20.62
   1   6  -8  371.05   18.63
  -1   6   8  400.69   19.81
  -1   6   7   24.23    3.98
   1  -6  -7   35.74    5.98
  -1   6   7   32.13    5.54
   1   6  -7   31.11    5.36
  -1   6   6  118.13    8.47
   1  -6  -6  130.20   11.47
   1   6  -6  123.30   10.19
  -1   6   6  127.16   10.49
  -1   6   5  328.05   14.87
  -1  -6   5  313.79   17.99
   1  -6  -5  328.10   18.48
  -1   6   5  325.90   17.21
   1   6  -5  298.75   16.64
  -1   6   4   48.80    5.50
  -1  -6   4   44.86    6.77
   1  -6  -4   37.19    6.26
  -1   6   4   27.74    5.19
   1   6  -4   52.60    6.66
  -1   6   3  424.83   17.82
  -1  -6   3  430.07   21.18
   1  -6  -3  424.98   21.44
   1   6  -3  376.56   19.29
  -1   6   3  431.78   19.98
  -1   6   2   29.14    4.50
   1  -6  -2   28.30    5.37
  -1  -6   2   38.92    6.23
   1   6  -2   24.08    4.94
  -1   6   2   28.36    4.87
  -1  -6   1  434.07   21.24
   1  -6  -1  403.37   20.97
  -1   6   1  375.84   18.65
   1   6  -1  450.14   20.74
  -1  -6   0  233.34   15.29
  -1   6   0  253.27   14.43
   1   6   0  254.65   15.20
   1   6   1   25.30    3.59
  -1  -6  -1   22.16    5.06
   1   6   1   21.09    4.47
  -1   6  -1   23.17    4.29
   1   6   2   19.76    3.09
  -1  -6  -2   12.59    4.22
  -1   6  -2   22.06    4.21
   1   6   3  263.82   11.32
  -1  -6  -3  233.20   15.49
  -1   6  -3  239.11   13.74
   1   6   3  264.81   15.74
   1   6   4   21.25    3.03
   1  -6   4   18.72    4.83
  -1  -6  -4   13.80    4.19
  -1   6  -4   19.27    4.14
   1   6   4   25.44    5.05
   1   6   5  400.84   14.47
   1   6   5  400.58   20.27
  -1   6  -5  361.44   17.37
   1  -6   5  389.75   20.08
  -1  -6  -5  445.00   21.71
  -1   6  -6  139.78   10.14
   1   6   6  151.04   11.83
   1  -6   6  131.88   11.15
  -1  -6  -6  145.47   12.11
  -1   6  -7   44.78    5.59
   1   6   7   27.36    5.35
  -1  -6  -7   38.83    6.42
   1  -6   7   29.13    5.74
  -1   6  -8  230.11   12.85
   1   6   8  258.22   15.84
   1  -6   8  226.15   14.93
  -1  -6  -8  224.35   15.25
  -1   6  -9    0.66    1.73
   1   6   9    0.96    2.36
  -1  -6  -9    2.00    2.44
   1  -6   9    8.50    3.26
   1   6  10  146.59   12.00
  -1   6 -10  129.36    9.37
  -1  -6 -10  116.34   11.01
   1  -6  10  130.54   11.27
   1   6  11  425.97   21.80
  -1   6 -11  447.71   18.72
   1  -6  11  413.16   21.08
  -1  -6 -11  453.37   22.47
  -1   6 -12   15.33    3.30
   1   6  12   13.14    4.29
   1  -6  12   13.22    4.01
  -1  -6 -12   15.22    4.20
   1   6  13   54.59    7.61
  -1   6 -13   41.56    5.22
   1  -6  13   38.80    6.19
  -1  -6 -13   40.72    6.71
   1   6  14  219.25   15.35
  -1   6 -14  242.72   12.78
   1  -6  14  229.74   15.04
  -1  -6 -14  239.53   15.87
   1   6  15   12.69    4.48
  -1   6 -15    7.43    2.63
  -1  -6 -15    7.26    3.46
   1  -6  15   16.27    4.43
  -1   6 -16   27.06    4.27
  -1  -6 -16   35.48    6.21
   1  -6  16   34.71    6.01
  -1  -6 -17  150.50   12.66
   1  -6  17  154.81   12.47
  -1  -6 -18   23.41    5.41
   1   7 -14   48.08    6.91
   1   7 -13   16.67    4.62
   1   7 -12  171.26   12.82
   1   7 -11   17.61    4.70
  -1   7  10  668.85   28.98
   1   7 -10  636.11   27.09
   1   7  -9  102.34    9.97
  -1   7   9   80.47    9.19
  -1   7   8   23.05    5.33
   1   7  -8   16.06    4.38
  -1   7   7    4.22    2.43
   1   7  -7    2.85    2.15
  -1   7   7    2.96    2.58
  -1   7   6   -0.62    2.13
  -1   7   6    2.92    2.54
   1   7  -6    4.76    3.05
  -1   7   5  166.48   10.59
   1   7  -5  185.48   13.42
  -1   7   5  157.79   12.49
  -1   7   4  755.68   26.89
   1   7  -4  769.78   30.77
  -1   7   4  800.57   30.88
  -1   7   3    5.35    2.62
   1   7  -3    2.89    2.95
  -1   7   3    6.41    3.17
  -1   7   2   50.47    6.19
   1   7  -2   54.76    7.42
  -1   7   2   44.19    6.70
  -1   7   1    8.54    3.09
   1   7  -1    3.87    2.05
  -1   7   1    7.98    3.38
   1   7  -1   12.80    4.17
   1   7   0   52.71    5.41
  -1   7   0   49.06    6.14
  -1   7   0   50.67    6.73
   1   7   0   34.82    6.32
   1   7   1   66.67    6.02
  -1   7  -1   73.95    8.07
   1   7   1   57.07    8.03
   1   7   2  185.48    9.89
   1   7   2  191.67   14.15
  -1   7  -2  184.04   12.71
   1   7   3    1.33    1.69
  -1   7  -3    0.83    2.44
   1   7   3   -2.04    2.67
   1   7   4  275.86   11.77
  -1   7  -4  233.78   14.54
   1   7   4  250.75   16.62
   1   7   5   26.01    5.55
  -1   7  -5   24.94    4.96
   1   7   6  312.71   18.47
  -1   7  -6  261.14   15.08
   1   7   7  185.20   14.11
  -1   7  -7  190.06   12.42
   1   7   8    8.55    3.83
  -1   7  -8    8.42    3.09
  -1   7  -9   10.55    3.20
  -1   7 -10   17.75    4.12
  -1   7 -11   26.81    4.67
   1   8  -8  135.20   11.90
   1   8  -7   17.52    4.58
   1   8  -6  142.42   12.53
  -1   8   4    6.61    2.80
  -1   8   3   27.97    4.67
  -1   8   2   29.72    4.85
  -1   8   1    2.18    2.33
  -1   8   1    0.98    2.56
  -1   8   0  261.91   14.77
  -1   8   0  280.76   16.95
  -1   8  -1    0.78    2.17
  -1   8  -1    0.95    2.48
  -1   8  -2  115.06   10.00
  -1   8  -2  109.98   10.44
  -1   8  -3   40.33    6.56
  -1   8  -4    0.90    2.88
   2   0 -32  210.19   14.69
   2   0 -31   -0.97    2.96
   2   0 -30  301.53   17.55
   2   0 -29   -0.93    2.11
   2   0 -29    0.93    2.44
   2   0 -28  158.94   12.22
   2   0 -28  172.07   12.68
   2   0 -27    1.76    2.44
   2   0 -27   -0.25    1.09
   2   0 -27    3.57    2.61
   2   0 -26    1.70    2.61
   2   0 -26    3.80    1.40
   2   0 -26    0.87    2.12
   2   0 -25   -0.82    1.86
   2   0 -25   -0.28    0.94
   2   0 -25   -0.84    2.20
   2   0 -24  346.57   17.54
   2   0 -24  378.40   18.28
   2   0 -24  337.65   11.98
   2   0 -23   -0.76    1.87
   2   0 -23   -0.80    2.32
   2   0 -22   58.50    6.60
   2   0 -21    0.75    1.69
   2   0 -20  573.89   23.10
   2   0 -19    0.69    1.70
   2   0 -18   38.15    5.13
   2   0 -17    3.21    1.88
   2   0 -16 2004.97   54.70
   2   0 -15    0.59    1.43
   2   0 -14 1893.92   51.21
   2   0 -13    1.05    1.38
   2   0 -12  421.90   16.53
   2   0 -11   -0.47    0.87
   2   0 -10   60.13    5.05
   2   0  -9    0.82    0.93
   2   0  -8 2902.84   70.25
   2   0  -7    0.35    0.97
   2   0  -6 1253.52   32.91
   2   0  -5    2.89    1.07
   2   0  -4  777.16   20.79
   2   0  -4  716.11   19.62
  -2   0   3   -0.18    0.57
   2   0  -3    0.68    0.81
  -2   0   2 4157.29   93.03
  -2   0   1    0.48    0.49
  -2   0   1    0.75    0.46
  -2   0   0   11.41    1.50
  -2   0  -1    3.69    1.15
  -2   0  -2 4514.93  101.44
  -2   0  -3    0.20    0.50
   2   0   4 1293.14   31.00
  -2   0  -4 1364.40   32.66
  -2   0  -5    1.28    0.73
   2   0   5    1.04    0.61
  -2   0  -5    2.00    0.99
  -2   0  -6  153.51    6.00
   2   0   6  149.10    5.68
  -2   0  -6  146.21    6.36
  -2   0  -7    0.21    0.55
   2   0   7    1.50    0.67
  -2   0  -7    2.44    0.87
  -2   0  -7   -0.09    0.24
  -2   0  -8 5938.96  133.37
  -2   0  -8 6103.91  132.91
   2   0   8 6028.42  132.25
  -2   0  -8 5813.02  130.54
  -2   0  -9    0.27    0.71
  -2   0  -9    0.27    0.71
  -2   0  -9    0.75    0.55
  -2   0 -10   13.29    1.96
  -2   0 -10   10.25    1.38
  -2   0 -11    1.47    0.86
  -2   0 -11    1.05    0.67
  -2   0 -12  193.29    8.98
  -2   0 -12  195.52    8.50
  -2   0 -12  191.42    7.70
  -2   0 -13    1.58    1.01
  -2   0 -13    2.13    1.07
  -2   0 -14 2841.59   68.81
  -2   0 -14 2875.05   70.78
  -2   0 -14 2962.11   68.45
  -2   0 -15    0.46    1.29
  -2   0 -15    1.33    1.10
  -2   0 -15    0.32    0.89
  -2   0 -16  755.91   22.47
  -2   0 -16  783.87   25.07
  -2   0 -16  760.76   22.65
  -2   0 -17    1.05    1.76
  -2   0 -17    1.36    1.13
  -2   0 -17    1.87    1.34
  -2   0 -18 2012.70   50.75
  -2   0 -18 2086.12   54.88
  -2   0 -18 2068.15   51.90
  -2   0 -19    1.77    1.96
  -2   0 -19    1.02    1.09
  -2   0 -19    3.81    1.61
  -2   0 -20  171.84    8.15
  -2   0 -20  161.50   10.32
  -2   0 -20  171.69    9.13
  -2   0 -21    0.65    1.70
  -2   0 -21    0.67    0.98
  -2   0 -21    0.47    1.30
  -2   0 -22  283.72   14.81
  -2   0 -22  306.19   13.30
  -2   0 -22  283.85   11.05
  -2   0 -23   -0.71    1.86
  -2   0 -23    0.32    1.09
  -2   0 -23    1.54    1.90
  -2   0 -24  928.03   31.86
  -2   0 -24  909.71   28.70
  -2   0 -24  915.46   25.23
  -2   0 -25    1.44    1.22
  -2   0 -25   -0.77    1.89
  -2   0 -25   -0.55    1.77
  -2   0 -26  291.54   16.14
  -2   0 -26  319.32   14.57
  -2   0 -26  326.41   11.05
  -2   0 -27    1.66    2.65
  -2   0 -27    4.10    1.88
  -2   0 -28    9.39    3.95
  -2   0 -28   12.64    3.11
  -2   0 -29   -0.88    2.56
  -2   0 -30  310.83   17.57
   2   1 -32  218.03   15.20
   2  -1 -32  227.77   15.41
   2   1 -31   71.77    8.64
   2  -1 -31   76.43    8.93
   2   1 -30   19.37    4.55
   2   1 -30   24.56    5.16
   2  -1 -30   21.59    4.77
   2   1 -29   44.55    6.41
   2   1 -29   41.59    6.58
   2  -1 -29   49.62    6.81
   2   1 -28   19.24    4.39
   2  -1 -28   18.61    4.72
   2  -1 -28   17.12    4.50
   2   1 -28   17.07    4.48
   2  -1 -27   45.78    6.91
   2  -1 -27   50.10    6.83
   2   1 -27   51.10    7.00
   2  -1 -26  666.50   27.70
   2   1 -26  660.68   27.26
   2  -1 -26  666.92   26.87
   2  -1 -25  217.93   14.16
   2   1 -25  202.73   13.79
   2  -1 -25  207.54   13.33
   2  -1 -24   61.67    7.38
   2   1 -24   61.24    7.41
   2  -1 -24   50.59    6.51
   2  -1 -23   76.69    8.14
   2   1 -23   86.34    8.52
   2  -1 -23   57.75    6.91
   2  -1 -22    1.65    2.28
   2   1 -22    0.81    1.84
   2  -1 -22    0.77    1.74
   2  -1 -21  346.52   17.86
   2   1 -21  392.91   18.56
   2  -1 -21  361.28   17.40
   2  -1 -20 1240.76   39.72
   2   1 -20 1255.66   39.64
   2  -1 -20 1205.36   38.70
   2  -1 -19   52.89    6.21
   2   1 -19   56.04    6.38
   2  -1 -19   49.23    5.85
   2  -1 -18  367.49   10.47
   2  -1 -18  380.99   17.58
   2   1 -18  359.32   17.24
   2  -1 -18  386.20   17.45
   2  -1 -17   35.04    5.03
   2  -1 -17   31.86    2.27
   2  -1 -17   41.70    5.24
   2   1 -17   31.45    4.61
   2  -1 -16  546.00   14.97
   2  -1 -16  543.80   21.43
   2   1 -16  527.54   21.39
   2  -1 -15  327.96   15.34
   2   1 -15  338.20   15.66
   2  -1 -15  331.78   10.22
  -2  -1  15  337.45   15.27
   2   1 -14  337.52   15.54
   2  -1 -14  339.95   10.49
   2   1 -13  277.28   13.60
   2  -1 -13  294.47    9.47
   2   1 -12 1622.52   44.72
   2  -1 -12 1610.82   38.58
   2  -1 -11  287.98    9.46
   2   1 -11  279.50   12.89
   2  -1 -10 1981.66   50.57
   2  -1 -10 1952.35   46.15
   2   1 -10 1947.40   51.17
   2  -1  -9   87.35    4.42
   2  -1  -9   85.56    6.01
   2   1  -9   89.03    6.29
  -2   1   8    5.81    1.05
   2  -1  -8    4.79    1.49
   2  -1  -8    5.32    1.19
   2   1  -8    4.97    1.58
   2  -1  -7 1578.09   38.50
   2  -1  -7 1621.46   41.10
   2   1  -7 1583.29   41.55
  -2   1   7 1609.80   38.14
   2  -1  -6   76.83    5.06
   2   1  -6   79.40    5.24
  -2   1   6   75.23    4.02
   2   1  -5 1046.02   26.72
  -2   1   5 1020.16   24.51
  -2   1   4 2731.54   66.37
   2   1  -4 2946.11   66.81
  -2   1   3    9.02    1.56
   2   1  -3    7.02    1.49
  -2   1   2  746.14   20.60
  -2  -1   2  738.37   20.12
   2   1  -1    2.10    0.48
  -2  -1   1    2.91    0.92
  -2  -1   0 2299.40   53.20
   2  -1   1 1950.06   43.44
  -2  -1  -1 1908.56   45.22
  -2  -1  -2 3954.72   88.60
  -2  -1  -3  101.79    4.33
   2  -1   4 3435.29   77.68
  -2  -1  -4 3467.77   77.43
   2  -1   5   43.19    2.70
   2   1   5   45.25    2.92
  -2  -1  -6  595.01   18.69
  -2   1  -6  634.68   16.47
   2  -1   6  590.85   16.23
   2   1   6  611.14   16.49
  -2  -1  -7 3377.45   81.04
  -2   1  -7 3430.38   76.03
   2  -1   7 3368.35   77.62
  -2   1  -7 3514.67   78.01
   2   1   7 3459.41   77.64
   2   1   8  275.09    8.72
  -2  -1  -8  249.02   10.92
   2   1   8  276.50   10.77
  -2   1  -8  263.47    8.02
   2  -1   8  272.81    9.00
  -2   1  -8  258.43    9.13
   2   1   9  444.02   15.55
  -2  -1  -9  460.05   16.40
  -2   1  -9  460.99   12.94
  -2   1  -9  463.21   14.00
   2  -1   9  459.96   13.62
  -2  -1 -10  614.37   20.68
   2   1  10  643.83   20.06
  -2   1 -10  609.04   17.12
  -2   1 -10  607.67   17.97
   2  -1  10  661.67   17.87
  -2  -1 -11  460.01   16.72
  -2   1 -11  416.44   13.37
   2   1  11  441.98   15.73
  -2   1 -11  441.08   14.15
   2  -1  11  434.72   13.68
  -2   1 -12 2350.09   55.19
   2   1  12 2368.83   57.97
  -2  -1 -12 2246.70   59.05
  -2   1 -12 2261.91   55.75
   2  -1  12 2295.84   55.09
  -2   1 -13    1.78    1.16
  -2  -1 -13    1.55    1.44
   2   1  13    1.31    1.28
  -2   1 -13    0.98    1.00
   2  -1  13    0.89    0.87
  -2  -1 -14  186.86   10.28
  -2   1 -14  167.70    8.01
  -2   1 -14  159.64    8.26
   2  -1  14  180.34    8.18
  -2  -1 -15  411.90   17.28
  -2   1 -15  418.84   14.80
  -2   1 -15  407.76   15.37
  -2  -1 -15  438.37   14.70
   2  -1  15  413.20   14.64
  -2   1 -16   17.91    2.89
  -2  -1 -16   22.15    3.79
  -2   1 -16   18.39    2.95
  -2  -1 -16   21.75    2.91
  -2   1 -17  453.35   16.49
  -2  -1 -17  452.20   19.17
  -2   1 -17  455.74   17.00
  -2  -1 -17  485.12   16.33
  -2   1 -18 1021.96   29.47
  -2  -1 -18  953.53   32.42
  -2   1 -18 1008.91   29.49
  -2  -1 -18  958.65   28.29
  -2   1 -19   13.51    2.83
  -2  -1 -19   10.74    3.25
  -2   1 -19   10.72    2.52
  -2  -1 -19    8.91    2.05
  -2  -1 -20  660.13   25.65
  -2   1 -20  662.56   22.73
  -2   1 -20  702.12   22.97
  -2  -1 -20  668.09   21.94
  -2  -1 -21    3.86    2.26
  -2   1 -21    0.54    1.59
  -2   1 -21    1.59    1.77
  -2  -1 -21    6.06    2.02
  -2  -1 -22  572.85   24.08
  -2   1 -22  585.27   21.32
  -2   1 -22  545.97   20.58
  -2  -1 -22  576.30   20.03
  -2  -1 -23  336.38   17.61
  -2   1 -23  352.23   15.73
  -2   1 -23  351.64   15.40
  -2  -1 -23  344.83   14.60
  -2   1 -24    1.90    1.94
  -2  -1 -24    2.57    2.63
  -2   1 -24    5.90    2.25
  -2  -1 -24    2.62    1.61
  -2  -1 -25  130.57   10.77
  -2   1 -25  123.91    9.23
  -2   1 -25  118.48    8.73
  -2  -1 -25  116.34    8.13
  -2   1 -26  417.70   16.51
  -2  -1 -26  431.35   21.22
  -2   1 -26  434.92   18.93
  -2   1 -26  463.36   18.62
  -2  -1 -26  431.94   17.53
  -2   1 -27   27.45    3.87
  -2  -1 -27   42.62    6.69
  -2   1 -27   31.49    4.99
  -2   1 -27   30.57    4.64
  -2  -1 -27   24.99    4.14
  -2  -1 -28  202.43   14.33
  -2   1 -28  201.73   12.39
  -2   1 -28  193.18   11.64
  -2  -1 -28  188.97   11.12
  -2  -1 -29  235.73   15.72
  -2  -1 -30    2.05    2.99
   2   2 -31   16.00    4.64
   2  -2 -31   25.60    5.24
   2   2 -30   51.56    7.57
   2  -2 -30   67.93    8.27
   2   2 -29  154.48   12.75
   2  -2 -29  144.29   11.94
   2   2 -28    1.02    2.10
   2  -2 -28    0.93    2.26
   2  -2 -27  493.77   24.34
   2  -2 -27  478.26   24.04
   2   2 -27  511.50   24.07
   2  -2 -27  505.60   23.19
   2  -2 -26    2.07    2.71
   2  -2 -26    1.04    2.71
   2   2 -26    0.98    2.39
   2  -2 -26   -1.78    2.18
   2  -2 -25  255.03   16.36
   2  -2 -25  273.96   16.87
   2   2 -25  244.09   15.78
   2  -2 -25  257.65   15.37
   2  -2 -24   42.09    6.51
   2  -2 -24   42.38    6.49
   2   2 -24   36.50    6.05
   2  -2 -24   35.98    5.77
   2  -2 -23   65.35    8.10
   2  -2 -23   63.33    7.86
   2   2 -23   66.80    7.74
   2  -2 -23   68.84    7.61
   2  -2 -22   14.54    3.77
   2  -2 -22   14.90    4.05
   2   2 -22   20.50    4.74
   2  -2 -22   16.52    3.98
   2  -2 -21   60.93    7.36
   2  -2 -21   70.53    8.03
   2   2 -21   72.17    7.82
  -2  -2  21   84.95    8.14
   2  -2 -20   91.64    8.78
   2  -2 -20   77.21    8.41
   2   2 -20   85.42    8.52
  -2  -2  20  102.35    8.76
   2  -2 -19 1367.09   43.84
   2  -2 -19 1487.02   45.64
   2   2 -19 1421.84   44.68
  -2  -2  19 1422.85   43.18
   2  -2 -18    9.10    3.06
   2  -2 -18   11.49    3.31
   2   2 -18   12.78    3.69
  -2  -2  18    6.21    2.56
   2  -2 -17  276.24   14.67
   2  -2 -17  315.43   16.27
   2   2 -17  271.98   15.13
  -2  -2  17  264.60   13.96
   2  -2 -16   95.10    7.90
   2  -2 -16   69.90    7.28
   2   2 -16   79.16    7.58
  -2  -2  16   93.45    7.62
   2  -2 -15  150.51   10.06
   2  -2 -15  161.17   10.91
   2   2 -15  155.46   10.65
  -2  -2  15  160.81   10.01
   2  -2 -14   96.87    7.71
   2  -2 -14   85.70    7.72
   2   2 -14   82.80    7.45
  -2  -2  14   89.75    7.16
   2  -2 -13 1281.86   38.22
   2  -2 -13 1375.63   40.01
   2   2 -13 1290.91   39.37
  -2  -2  13 1273.70   37.82
   2  -2 -12   27.71    4.01
   2   2 -12   29.01    4.24
  -2   2  12   31.97    2.32
   2  -2 -11 1540.45   43.11
   2   2 -11 1515.92   44.08
  -2   2  11 1591.63   37.55
   2  -2 -10  135.94    8.41
   2   2 -10  153.72    9.34
  -2   2  10  132.04    5.79
   2  -2  -9 1020.31   30.43
   2   2  -9 1015.57   31.27
  -2   2   9 1046.19   26.64
  -2   2   8  536.99   16.06
   2  -2  -8  533.56   18.71
   2   2  -8  574.85   19.88
   2  -2  -7  169.84    8.94
  -2   2   7  166.55    8.41
  -2   2   7  182.96    7.58
   2   2  -7  174.16    9.34
   2  -2  -6  104.98    6.74
   2   2  -6  137.86    7.85
   2   2  -5 2660.67   65.40
   2   2  -4  192.03    9.22
  -2  -2   3 1445.46   38.64
   2  -2  -3 1483.55   37.62
  -2   2   3 1489.53   37.46
  -2  -2   2  150.69    7.76
   2  -2  -2  151.36    6.94
  -2   2   2  149.99    6.84
  -2  -2   1  656.47   20.64
   2  -2  -1  705.58   19.44
  -2   2   1  697.25   19.31
  -2  -2   0    2.62    1.09
  -2   2   0    3.46    0.94
   2  -2   0    2.66    0.92
  -2  -2  -1    5.12    1.45
  -2   2  -1    6.43    1.20
   2  -2   1    5.88    1.17
  -2  -2  -2  374.77   12.86
  -2   2  -2  346.05   10.47
  -2  -2  -3 3671.62   84.00
   2  -2   3 3586.78   83.89
  -2   2  -3 3543.13   80.66
   2   2   3 3701.77   86.02
  -2  -2  -4   74.71    4.85
   2  -2   4   72.69    4.87
  -2   2  -4   74.68    3.34
   2   2   4   72.02    5.49
  -2  -2  -5 1119.57   25.64
  -2  -2  -5 1046.73   29.10
   2  -2   5 1116.82   29.53
  -2   2  -5 1068.58   25.79
  -2  -2  -6  334.51    9.76
   2  -2   6  344.68   12.38
  -2  -2  -7 2300.34   60.60
   2  -2   7 2430.65   57.49
  -2  -2  -8  342.46   14.70
   2  -2   8  350.03   12.67
  -2   2  -8  317.23   12.45
  -2  -2  -9 2035.93   56.06
  -2   2  -9 2041.53   52.89
   2  -2   9 2109.55   52.36
   2   2   9 2218.99   49.86
  -2  -2 -10   94.22    7.38
   2  -2  10   95.60    5.92
  -2   2 -10   88.15    6.06
   2   2  10  102.15    4.65
   2   2  11  780.17   26.40
  -2  -2 -11  889.29   28.60
   2  -2  11  850.09   24.76
  -2   2 -11  846.81   25.43
   2   2  11  858.76   21.51
   2   2  12   67.85    3.33
  -2  -2 -12   61.42    6.21
   2   2  12   61.69    5.74
  -2   2 -12   77.31    5.78
   2  -2  12   57.93    4.80
  -2  -2 -13 2416.06   64.71
   2   2  13 2442.57   63.07
  -2   2 -13 2467.99   61.10
   2  -2  13 2393.23   60.00
   2   2  14  162.84    9.84
  -2  -2 -14  130.23    9.75
  -2   2 -14  161.01    9.05
   2  -2  14  161.22    8.48
   2   2  15   46.48    5.25
  -2  -2 -15   38.27    5.29
  -2   2 -15   45.65    4.85
   2   2  16   52.46    5.64
  -2  -2 -16   49.72    6.13
  -2   2 -16   56.09    4.27
  -2   2 -16   50.22    5.14
  -2   2 -17   49.25    4.18
  -2  -2 -17   44.01    5.94
  -2   2 -17   45.39    5.01
  -2  -2 -18   99.92    9.23
  -2   2 -18  112.82    6.68
  -2   2 -18  113.67    7.95
  -2  -2 -19  868.44   31.43
  -2   2 -19  809.35   24.75
  -2   2 -19  799.02   26.93
   2  -2  19  831.45   26.14
  -2  -2 -20   10.65    3.29
  -2   2 -20   14.36    2.68
  -2   2 -20   11.44    2.95
   2  -2  20   12.37    2.75
  -2  -2 -21  242.99   15.26
  -2   2 -21  241.42   11.33
  -2   2 -21  243.38   12.83
   2  -2  21  249.43   12.24
  -2  -2 -21  253.92   12.34
  -2   2 -22    7.77    2.38
  -2  -2 -22    9.46    3.50
  -2   2 -22   12.26    3.05
  -2  -2 -22   10.44    2.55
  -2   2 -23   35.37    4.50
  -2  -2 -23   29.21    5.52
  -2   2 -23   33.70    4.98
  -2  -2 -23   36.22    4.58
  -2   2 -24   20.45    3.57
  -2  -2 -24    8.02    4.26
  -2   2 -24   17.58    3.71
  -2  -2 -24   19.43    3.52
  -2  -2 -25  591.05   26.63
  -2   2 -25  598.65   21.65
  -2   2 -25  580.45   22.99
  -2  -2 -25  587.90   21.72
  -2   2 -26   27.69    4.37
  -2  -2 -26   33.81    6.29
  -2   2 -26   31.71    5.09
  -2  -2 -26   31.14    4.61
  -2  -2 -27  445.31   22.94
  -2   2 -27  435.44   18.15
  -2   2 -27  432.47   19.20
  -2  -2 -27  424.79   17.89
  -2  -2 -28    6.63    3.82
  -2   2 -28    8.74    3.23
   2   3 -29   90.54   10.46
   2  -3 -29   91.86    9.95
   2   3 -28    4.42    2.50
   2  -3 -28    2.02    2.81
   2  -3 -27  273.49   17.64
   2   3 -27  234.21   16.34
   2  -3 -27  220.72   15.37
   2  -3 -26   48.38    7.39
   2   3 -26   39.96    6.91
   2  -3 -26   43.59    6.79
   2  -3 -25  360.23   20.33
   2  -3 -25  381.47   21.64
   2   3 -25  409.03   21.43
  -2  -3  25  373.89   19.85
   2  -3 -24    2.06    2.52
   2  -3 -24   -1.12    3.27
   2   3 -24   -1.05    2.73
  -2  -3  24   -0.91    2.77
   2  -3 -23  244.08   15.63
   2  -3 -23  240.91   16.43
   2   3 -23  229.41   15.60
  -2  -3  23  258.33   15.37
   2  -3 -22    5.73    2.80
   2  -3 -22    7.49    3.28
   2   3 -22   16.18    4.67
  -2  -3  22   11.86    3.84
   2  -3 -21  830.84   31.74
   2  -3 -21  886.80   34.11
   2   3 -21  784.08   32.07
  -2  -3  21  847.36   31.09
   2  -3 -20    3.52    2.70
   2  -3 -20    3.05    2.65
   2   3 -20   -0.97    2.53
  -2  -3  20    3.98    2.65
   2  -3 -19   21.82    4.47
   2  -3 -19   26.69    5.26
   2   3 -19   18.77    4.53
  -2  -3  19   14.71    3.94
   2  -3 -18  202.11   13.11
   2  -3 -18  236.32   15.12
   2   3 -18  232.01   14.65
  -2  -3  18  227.91   13.33
   2  -3 -17    6.87    2.73
   2  -3 -17    7.40    3.08
   2   3 -17    7.92    3.15
  -2  -3  17    1.46    1.91
   2  -3 -16   18.86    3.88
   2  -3 -16   25.80    5.02
   2   3 -16   22.18    4.55
  -2  -3  16   19.88    3.91
   2  -3 -15 2382.37   63.59
   2  -3 -15 2417.49   66.48
   2   3 -15 2417.03   65.86
  -2  -3  15 2381.81   63.55
  -2   3  15 2305.49   53.58
   2  -3 -14   14.56    3.30
  -2   3  14    9.06    1.50
   2   3 -14   15.05    3.74
  -2  -3  14    9.37    2.84
   2  -3 -13   97.17    7.84
   2   3 -13   94.49    8.34
  -2   3  13   92.78    4.91
  -2  -3  13   94.37    7.85
   2  -3 -12   57.29    5.87
   2   3 -12   63.07    6.78
  -2   3  12   68.54    4.35
   2  -3 -11   99.33    7.50
  -2   3  11   89.79    5.31
   2   3 -11   87.94    7.72
   2  -3 -10   64.64    5.96
   2   3 -10   72.20    6.81
  -2   3   9 1591.43   43.29
   2   3  -9 1654.19   46.69
  -2   3   8    4.53    1.62
   2   3  -8    4.39    1.93
   2  -3  -8    5.76    2.06
  -2   3   7  366.50   14.43
   2   3  -7  358.01   15.91
  -2   3   7  351.03   14.93
  -2   3   6   65.26    5.41
   2   3  -6   81.06    6.73
  -2   3   6   70.11    5.83
  -2   3   5  948.88   28.10
   2   3  -5  952.26   29.78
  -2   3   5  909.75   28.00
  -2   3   4  269.73   11.98
   2   3  -4  267.28   12.97
  -2   3   4  273.46   11.90
   2  -3  -4  271.06   12.04
   2  -3  -3  675.54   22.09
  -2   3   3  720.97   22.24
  -2  -3   2    6.92    2.00
   2  -3  -2   10.01    2.29
  -2   3   2    6.49    1.74
  -2  -3   1  842.70   26.43
   2  -3  -1  851.17   24.96
  -2   3   1  840.30   24.92
  -2  -3   0    0.48    1.32
   2  -3   0    2.13    1.14
  -2   3   0    1.68    1.24
  -2  -3  -1 4269.47   97.40
   2   3   1 4074.94   98.69
  -2   3  -1 3969.37   94.28
   2   3   2    8.39    1.02
  -2  -3  -2    7.58    2.06
   2   3   2   10.74    2.54
  -2   3  -2    7.69    1.69
  -2  -3  -3  140.38    8.41
   2   3   3  146.16    9.18
  -2   3  -3  153.65    7.00
  -2  -3  -4  268.36   12.10
  -2   3  -4  255.91    9.73
   2   3   4  280.70   13.15
  -2  -3  -5   56.15    5.13
  -2   3  -5   58.52    3.92
   2   3   5   64.46    5.93
  -2  -3  -6  611.19   20.70
   2   3   6  581.63   21.51
  -2   3  -6  579.18   16.99
  -2  -3  -7 2231.12   58.35
   2   3   7 2219.44   60.17
  -2   3  -7 2338.51   54.15
  -2  -3  -8    2.04    0.94
  -2   3  -8    0.96    0.80
   2   3   8    2.98    1.74
  -2  -3  -9  718.06   20.44
  -2  -3  -9  772.21   27.19
  -2  -3 -10   28.29    2.87
  -2  -3 -10   27.68    4.56
  -2  -3 -11  414.76   13.86
  -2   3 -11  399.04   16.63
  -2  -3 -11  374.53   18.23
  -2  -3 -12  153.79    7.71
  -2  -3 -12  163.54   11.22
  -2   3 -12  143.46    9.32
  -2  -3 -13  206.62    9.68
  -2  -3 -13  216.43   13.50
   2  -3  13  205.44   10.84
  -2   3 -13  203.80   11.44
   2   3  13  220.16    7.78
  -2  -3 -14    1.72    1.26
   2   3  14    0.78    0.71
   2   3  14    5.60    2.33
  -2  -3 -14    2.50    1.89
  -2   3 -14    2.42    1.77
   2  -3  14    1.05    1.37
  -2  -3 -15  679.47   20.69
   2   3  15  680.67   24.22
  -2  -3 -15  621.30   25.20
   2  -3  15  640.73   21.43
  -2   3 -15  625.88   22.43
  -2  -3 -16   60.95    5.59
   2   3  16   69.14    7.09
  -2  -3 -16   60.01    7.24
  -2   3 -16   61.11    6.20
   2  -3  16   57.33    5.64
  -2  -3 -17  294.76   13.55
   2   3  17  290.26   15.47
  -2  -3 -17  289.03   16.90
  -2   3 -17  295.47   14.73
   2  -3  17  297.11   13.80
  -2  -3 -18   20.92    3.79
  -2  -3 -18   17.25    4.18
   2   3  18   19.27    4.12
   2  -3  18   20.74    3.64
  -2  -3 -19   37.77    5.02
  -2  -3 -19   22.78    5.05
  -2   3 -19   35.91    4.99
   2  -3  19   23.01    3.79
  -2  -3 -20  256.59   13.46
  -2  -3 -20  249.82   16.19
  -2   3 -20  260.93   14.28
   2  -3  20  243.03   12.77
  -2  -3 -21  256.45   13.89
  -2  -3 -21  279.05   17.56
  -2   3 -21  273.01   11.49
  -2   3 -21  265.00   14.57
   2  -3  21  258.57   13.47
  -2  -3 -22   67.64    7.07
  -2  -3 -22   62.14    8.31
  -2   3 -22   74.46    5.80
  -2   3 -22   59.56    7.06
   2  -3  22   66.76    6.51
  -2  -3 -23  621.49   25.06
  -2  -3 -23  739.72   30.94
  -2   3 -23  656.94   21.73
  -2   3 -23  658.04   25.87
   2  -3  23  705.75   24.91
  -2  -3 -24   26.69    4.78
  -2   3 -24   21.18    3.30
  -2  -3 -24   20.56    5.19
   2  -3  24   16.66    3.83
  -2  -3 -25  251.62   14.63
  -2  -3 -25  218.43   16.36
  -2   3 -25  224.97   14.04
   2  -3  25  266.89   13.98
  -2  -3 -25  254.88   13.83
  -2  -3 -26    1.68    2.45
  -2   3 -26   -0.81    2.25
  -2  -3 -26    2.77    1.81
  -2  -3 -27   13.85    4.25
  -2   3 -27   27.09    4.93
  -2  -3 -27   17.97    3.69
  -2  -3 -28   16.07    4.82
   2  -4 -26    1.13    2.94
   2   4 -26    1.19    2.92
   2  -4 -25   91.61   10.01
   2   4 -25   72.12    9.65
  -2  -4  25  107.97   10.48
   2  -4 -24  262.46   17.01
   2   4 -24  259.03   17.69
  -2  -4  24  247.60   16.03
   2  -4 -23   47.77    7.08
   2   4 -23   42.90    7.16
  -2  -4  23   35.73    6.08
   2  -4 -22  214.30   14.72
   2  -4 -22  215.66   16.51
   2   4 -22  207.25   15.64
  -2  -4  22  237.49   15.14
   2  -4 -21   65.97    8.21
   2  -4 -21   64.97    8.92
   2   4 -21   75.73    9.38
  -2  -4  21   71.37    8.10
   2  -4 -20  227.80   14.51
   2  -4 -20  242.79   16.75
   2   4 -20  210.96   15.36
  -2  -4  20  212.20   14.06
   2  -4 -19  247.34   14.77
   2  -4 -19  213.14   15.62
   2   4 -19  210.26   15.03
  -2  -4  19  216.23   14.09
   2  -4 -18  152.05   11.35
   2   4 -18  132.36   11.90
  -2  -4  18  161.63   11.72
   2  -4 -17  170.92   11.67
   2   4 -17  176.28   13.31
  -2   4  17  162.30    5.97
  -2  -4  17  159.99   11.70
   2  -4 -16  397.13   18.66
   2   4 -16  394.59   20.81
  -2   4  16  404.13   12.60
  -2  -4  16  424.98   19.74
   2   4 -15   71.60    8.09
  -2  -4  15   76.89    7.66
  -2   4  15   54.92    4.05
  -2   4  14  652.64   19.76
   2   4 -14  654.12   27.37
  -2  -4  14  673.67   26.09
  -2   4  13  199.27    9.18
  -2  -4  13  205.40   12.75
   2   4 -13  207.03   13.78
  -2  -4  12   67.85    7.17
   2   4 -12   80.04    8.35
   2  -4 -12   72.44    7.70
   2   4 -11  189.64   12.72
   2  -4 -11  168.36   11.66
   2   4 -10  315.86   16.93
   2  -4 -10  326.20   16.55
  -2   4   9  393.06   16.09
   2   4  -9  382.50   18.67
   2  -4  -9  387.36   18.12
  -2   4   9  404.19   17.78
  -2   4   8  817.03   26.83
   2   4  -8  862.53   30.51
  -2   4   8  839.25   28.62
   2  -4  -8  876.30   29.74
  -2   4   7  167.06    9.61
  -2  -4   7  145.85   10.29
   2   4  -7  154.58   10.93
  -2   4   7  169.12   10.40
   2  -4  -7  177.44   10.91
  -2   4   6  638.40   22.31
  -2  -4   6  632.53   24.22
   2   4  -6  633.54   24.60
  -2   4   6  672.96   23.57
   2  -4  -6  634.57   23.54
  -2   4   5  255.47   12.27
  -2  -4   5  241.75   13.19
   2   4  -5  217.42   12.99
   2  -4  -5  228.01   12.45
  -2   4   5  267.94   13.00
  -2   4   4   57.63    5.65
   2   4  -4   57.03    6.20
  -2  -4   4   65.28    6.50
   2  -4  -4   68.54    6.25
  -2   4   4   65.70    6.03
  -2   4   3  862.33   27.91
  -2  -4   3  871.82   29.53
  -2   4   3  910.81   28.16
  -2  -4   2  370.39   16.76
  -2   4   2  390.97   15.68
  -2  -4   1    5.07    2.34
  -2   4   1    3.84    1.54
   2   4  -1    0.66    1.73
  -2  -4   0 1096.03   34.51
   2   4   0 1120.13   35.29
  -2   4   0 1101.86   32.11
  -2  -4  -1   13.28    3.00
  -2   4  -1   15.54    2.80
   2   4   1   14.69    3.28
   2   4   2  820.18   21.41
  -2  -4  -2  835.41   28.18
   2   4   2  789.39   28.15
  -2   4  -2  837.02   25.25
   2   4   3  918.26   22.82
  -2  -4  -3  907.84   30.14
   2  -4   3  865.41   29.57
  -2   4  -3  922.83   26.98
   2   4   3  874.31   30.44
   2  -4   4   16.43    3.48
  -2  -4  -4   16.76    3.50
  -2   4  -4   27.36    3.35
   2   4   4   26.20    4.34
  -2  -4  -5  473.32   19.63
   2  -4   5  500.23   19.70
  -2   4  -5  475.25   16.46
   2   4   5  460.94   19.93
  -2  -4  -6  500.76   20.16
   2  -4   6  500.55   19.77
   2   4   6  481.91   20.59
  -2   4  -6  478.03   16.68
   2  -4   7  463.19   18.77
  -2  -4  -7  496.64   19.77
   2   4   7  429.70   19.46
  -2   4  -7  439.08   15.55
   2  -4   8 1115.59   34.54
  -2  -4  -8 1124.66   35.04
   2   4   8 1098.92   35.89
  -2   4  -8 1086.60   30.14
   2  -4   9   12.63    3.04
  -2  -4  -9   11.23    3.00
  -2   4  -9   14.98    2.40
   2   4   9   11.13    3.23
   2  -4  10   79.78    7.08
  -2  -4 -10   72.60    6.97
  -2   4 -10   85.05    5.55
   2   4  10   90.82    8.20
   2  -4  11  235.55   12.87
  -2   4 -11  257.75   10.56
   2   4  11  247.59   14.23
   2  -4  12   33.34    4.61
  -2  -4 -13  170.96    8.73
   2  -4  13  187.98   11.18
  -2  -4 -14  402.53   15.17
  -2  -4 -14  409.44   21.10
   2  -4  14  405.18   17.76
  -2  -4 -15   89.56    6.55
  -2  -4 -15  105.97   10.38
   2  -4  15  101.13    8.18
   2   4  15   92.86    4.84
  -2  -4 -16  620.80   21.07
  -2  -4 -16  647.21   27.96
   2  -4  16  646.77   23.66
   2   4  16  572.48   15.76
   2   4  17   30.51    5.31
  -2  -4 -17   20.52    5.22
  -2  -4 -17   30.56    4.12
   2  -4  17   24.65    4.28
  -2  -4 -18  502.25   19.55
   2   4  18  542.15   23.63
  -2  -4 -18  558.16   26.30
  -2   4 -18  486.39   22.01
   2  -4  18  527.09   21.35
  -2  -4 -19  625.42   22.90
   2   4  19  607.29   26.16
  -2  -4 -19  635.55   29.09
  -2   4 -19  630.53   25.57
   2  -4  19  642.79   24.37
  -2  -4 -20   70.05    6.82
  -2  -4 -20   73.13    9.39
  -2   4 -20   70.66    7.92
   2  -4  20   94.37    8.25
  -2  -4 -21   67.36    6.95
  -2  -4 -21   64.31    9.14
  -2   4 -21   65.99    7.65
   2  -4  21   60.60    6.64
  -2  -4 -22   34.02    5.05
  -2  -4 -22   21.20    6.02
  -2   4 -22   30.05    5.33
   2  -4  22   33.74    5.20
  -2  -4 -23   12.95    3.46
  -2   4 -23   17.96    4.24
   2  -4  23   14.85    3.77
  -2  -4 -24  473.82   21.14
  -2   4 -24  451.21   21.79
   2  -4  24  496.22   21.19
  -2   4 -25  252.81   15.47
   2  -4  25  228.67   13.85
  -2   4 -26   62.62    8.02
   2  -4  26   70.48    7.57
   2  -4  27    3.16    2.31
   2   5 -22   12.72    4.85
   2   5 -21   -1.25    3.06
   2   5 -20  408.76   23.01
  -2  -5  20  411.86   21.22
   2   5 -19    3.60    3.51
  -2  -5  19    0.97    2.37
   2   5 -18  133.61   12.51
  -2   5  18  144.48    6.19
  -2  -5  18  164.40   12.54
  -2   5  17    7.60    1.67
   2  -5 -17    4.58    2.80
   2   5 -17    5.74    3.52
  -2  -5  17    0.94    2.47
   2  -5 -16  306.14   18.78
   2   5 -16  286.31   18.36
  -2  -5  16  290.31   17.13
  -2   5  16  301.93   11.76
  -2   5  15   46.44    4.44
   2  -5 -15   39.18    6.91
   2   5 -15   46.91    7.33
  -2  -5  15   43.37    6.45
   2  -5 -14  160.99   12.92
  -2  -5  14  166.78   12.42
   2   5 -14  167.98   13.36
   2  -5 -13    6.86    3.01
   2   5 -13    8.29    3.71
  -2  -5  13   10.73    3.60
  -2  -5  12  350.13   18.51
   2   5 -12  352.67   19.59
   2  -5 -12  356.08   19.10
   2   5 -11  101.57    9.94
   2  -5 -11  105.42    9.69
   2   5 -10 1665.05   52.10
  -2   5  10 1600.90   49.30
   2  -5 -10 1734.78   51.62
  -2   5   9   36.93    4.70
   2   5  -9   38.51    6.13
  -2   5   9   42.09    5.89
   2  -5  -9   35.19    5.50
  -2   5   8   45.45    5.23
   2   5  -8   50.24    6.68
   2  -5  -8   53.28    6.66
  -2   5   8   56.74    6.60
  -2   5   7  197.73   11.13
  -2  -5   7  180.22   12.49
  -2   5   7  186.18   12.00
   2  -5  -7  219.77   13.35
  -2   5   6    5.44    2.24
  -2  -5   6    3.30    2.53
  -2   5   6    3.54    2.53
   2  -5  -6    8.57    3.14
  -2   5   5    1.22    1.69
  -2  -5   5    2.45    2.50
  -2   5   5   -0.69    1.90
  -2   5   4 1033.92   33.50
  -2  -5   4 1092.55   36.37
  -2   5   4 1082.08   34.50
   2   5  -4 1104.58   36.38
  -2   5   3   55.93    6.15
  -2  -5   3   73.71    7.55
  -2   5   3   62.76    6.42
   2   5  -3   53.69    6.53
  -2  -5   2  594.51   24.76
   2   5  -2  654.78   25.68
  -2   5   2  654.95   23.61
  -2  -5   1  132.97   10.29
   2   5  -1  137.95   10.54
  -2   5   1  126.55    8.84
  -2  -5   0  246.23   14.14
  -2   5   0  225.48   12.07
   2   5   0  229.69   13.85
   2   5   1    5.56    1.53
  -2  -5  -1    3.18    2.08
   2   5   1    6.41    2.67
  -2   5  -1    3.98    2.17
   2   5   2  385.67   12.45
   2  -5   2  370.36   18.30
  -2  -5  -2  343.91   17.68
   2   5   2  354.02   18.02
  -2   5  -2  370.62   15.82
   2   5   3    9.67    1.66
   2   5   3    9.79    3.46
  -2   5  -3    5.38    2.29
   2  -5   3   12.71    3.37
  -2  -5  -3    8.03    2.97
  -2   5  -4  357.53   15.12
   2   5   4  360.00   18.12
   2  -5   4  348.28   17.52
  -2  -5  -4  366.63   18.23
   2   5   5   17.47    4.23
  -2   5  -5   17.32    3.11
   2  -5   5   18.72    4.16
  -2  -5  -5   23.69    4.61
  -2   5  -6  446.88   17.05
   2   5   6  480.80   21.62
  -2  -5  -6  443.99   20.59
   2  -5   6  404.58   19.37
  -2   5  -7   13.47    2.65
   2   5   7   20.52    4.34
  -2  -5  -7   13.15    3.73
   2  -5   7   12.37    3.21
  -2   5  -8    7.50    2.13
   2   5   8    7.77    3.29
  -2  -5  -8    7.41    2.85
   2  -5   8    7.76    3.13
  -2   5  -9  128.30    7.81
   2   5   9  116.62   10.18
  -2  -5  -9  119.99    9.98
   2  -5   9  130.29   10.14
   2   5  10  445.43   21.27
  -2   5 -10  449.08   16.58
  -2  -5 -10  434.21   20.55
   2  -5  10  465.51   20.58
   2   5  11   16.19    4.33
  -2   5 -11   19.07    3.14
   2  -5  11   14.95    3.79
  -2  -5 -11   15.05    4.18
   2   5  12 1619.32   51.35
  -2   5 -12 1682.14   44.16
  -2  -5 -12 1717.59   50.87
   2  -5  12 1665.08   49.87
  -2   5 -13   24.73    3.47
   2   5  13   25.86    5.21
   2  -5  13   16.56    4.02
  -2  -5 -13   28.08    5.06
  -2   5 -14  153.63    8.37
   2   5  14  147.61   11.90
  -2  -5 -14  149.73   11.42
   2  -5  14  165.33   11.52
   2   5  15   23.13    4.99
  -2   5 -15   28.56    3.69
  -2  -5 -15   35.34    5.61
   2  -5  15   24.72    4.70
  -2   5 -16   14.61    2.71
   2  -5  16    9.65    3.25
  -2   5 -17   27.34    3.54
   2   5  17   17.19    2.12
   2  -5  17   25.84    4.74
  -2   5 -18  217.55    9.46
   2  -5  18  239.61   13.81
  -2   5 -19   48.60    4.63
   2  -5  19   50.19    6.75
   2  -5  20  371.17   18.65
   2  -5  21    4.15    2.87
   2  -5  22  231.17   14.32
   2  -5  23    0.84    2.06
   2  -5  24   22.96    4.93
  -2   6  18   14.99    2.44
  -2   6  17   20.56    3.09
  -2   6  16  127.57    8.07
   2   6 -16  120.92   12.49
  -2   6  15   18.61    3.33
   2   6 -15   17.12    5.19
   2  -6 -14  391.04   21.98
  -2  -6  14  385.91   20.93
   2  -6 -13   45.58    7.29
  -2  -6  13   67.43    8.31
   2  -6 -12    3.24    2.82
  -2  -6  12    2.03    2.48
   2  -6 -11  240.81   16.15
  -2   6  10    0.90    2.19
  -2   6   9   67.19    6.71
  -2   6   9   66.54    7.77
   2   6  -9   68.17    7.93
  -2   6   8  606.95   22.92
  -2   6   8  616.15   25.59
   2   6  -8  598.35   25.95
  -2   6   7    5.92    2.43
  -2  -6   7    7.80    3.49
  -2   6   7    7.57    3.01
   2   6  -7    3.66    3.05
  -2   6   6  370.23   16.99
   2  -6  -6  359.16   19.65
  -2  -6   6  371.88   19.76
   2   6  -6  368.34   19.11
  -2   6   6  379.54   18.63
  -2   6   5   -0.68    2.18
  -2  -6   5    1.94    2.53
  -2   6   5    1.61    2.10
   2   6  -5    1.82    2.23
  -2   6   4  208.68   12.42
   2  -6  -4  216.32   14.63
  -2  -6   4  223.66   14.75
   2   6  -4  203.97   13.86
  -2   6   4  212.08   13.20
  -2   6   3   59.60    6.54
  -2  -6   3   58.47    7.61
   2  -6  -3   58.47    7.58
   2   6  -3   53.59    7.13
  -2   6   3   54.19    6.62
  -2   6   2  201.02   12.50
  -2  -6   2  210.89   14.55
  -2   6   2  233.28   13.44
   2   6  -2  226.33   14.55
  -2  -6   1  199.77   13.92
   2   6  -1  185.76   13.23
  -2   6   1  197.90   12.38
   2   6   0   10.16    2.27
  -2  -6   0   10.50    3.85
  -2   6   0   11.29    3.27
   2   6   0   13.93    3.94
   2   6   1   40.39    3.87
  -2  -6  -1   38.21    6.30
   2   6   1   39.11    6.14
  -2   6  -1   37.88    5.43
   2   6   2  714.11   20.85
  -2  -6  -2  713.88   29.09
   2  -6   2  680.98   28.58
   2   6   2  703.13   28.71
  -2   6  -2  690.91   25.49
   2   6   3  292.73   10.75
   2   6   3  297.84   17.25
  -2   6  -3  288.85   14.67
  -2  -6  -3  328.53   18.09
   2  -6   3  299.09   17.31
   2   6   4  101.44    9.87
  -2   6  -4  121.20    8.99
  -2  -6  -4  117.40   10.70
   2  -6   4  115.53   10.59
   2   6   5  317.22   17.84
  -2   6  -5  270.82   13.91
  -2  -6  -5  286.02   17.16
   2  -6   5  299.52   17.12
   2   6   6   81.86    8.98
  -2   6  -6   85.65    7.27
   2  -6   6   88.89    9.09
  -2  -6  -6  105.12   10.17
  -2   6  -7   87.67    7.34
   2   6   7  101.31   10.00
   2  -6   7   95.40    9.67
  -2  -6  -7  104.15   10.04
  -2   6  -8  754.45   25.80
   2   6   8  759.03   30.97
   2  -6   8  776.25   30.45
  -2  -6  -8  774.61   31.07
   2   6   9    3.02    2.46
  -2   6  -9    1.69    2.02
  -2  -6  -9    4.01    3.21
   2  -6   9    1.86    2.42
  -2   6 -10   63.15    6.02
   2   6  10   72.01    8.61
  -2  -6 -10   74.27    8.73
   2  -6  10   73.63    8.30
   2   6  11   39.93    6.68
  -2   6 -11   42.70    4.91
   2  -6  11   44.72    6.67
  -2  -6 -11   39.17    6.49
  -2   6 -12   10.34    2.67
   2   6  12   10.36    3.59
  -2  -6 -12    8.04    3.72
   2  -6  12   13.97    4.13
  -2   6 -13  181.88   10.04
   2   6  13  189.84   14.13
  -2  -6 -13  177.50   13.53
   2  -6  13  182.72   13.28
  -2   6 -14  342.99   14.31
   2   6  14  351.08   19.94
   2  -6  14  342.20   18.85
  -2  -6 -14  334.54   19.20
  -2  -6 -15    7.11    3.52
   2  -6  15   11.18    3.66
  -2  -6 -16  137.90   12.04
   2  -6  16  123.46   10.88
  -2  -6 -17    1.03    2.69
   2  -6  17    0.94    2.45
  -2  -6 -18  272.22   17.26
  -2  -6 -19   33.32    6.28
   2   7 -16   27.90    5.76
   2   7 -15  451.63   22.86
   2   7 -14   45.36    7.26
   2   7 -13  143.92   12.37
   2   7 -12   14.38    4.26
   2   7 -11   11.27    3.91
   2   7 -10  104.29   10.42
  -2   7   9  212.96   14.60
   2   7  -9  211.12   14.85
  -2   7   8    1.38    2.21
  -2   7   8    0.96    2.35
   2   7  -8   -1.02    2.82
  -2   7   7  164.81   10.98
  -2   7   7  164.30   12.64
   2   7  -7  170.88   13.27
  -2   7   6   22.15    4.20
   2   7  -6   19.39    4.83
  -2   7   6   16.73    4.31
  -2   7   5  119.76    9.44
   2   7  -5  103.79   10.31
  -2   7   5  121.40   10.72
  -2   7   4   30.74    5.02
  -2   7   4   47.38    6.81
   2   7  -4   43.26    6.98
  -2   7   3   44.42    6.00
  -2   7   3   47.40    6.62
   2   7  -3   49.42    7.31
  -2   7   2    0.79    2.18
   2   7  -2   -0.94    1.78
  -2   7   2    1.72    2.75
   2   7  -2    1.03    2.34
  -2   7   1  352.94   17.78
   2   7  -1  352.01   14.09
   2   7  -1  358.83   20.07
  -2   7   1  360.85   18.32
   2   7   0    0.40    1.51
   2   7   0    4.17    3.33
  -2   7   0    2.45    2.50
  -2   7   0    0.82    2.16
   2   7   1  427.52   14.95
   2   7   1  436.32   22.51
  -2   7  -1  400.24   19.34
   2   7   2  145.00    7.27
   2   7   2  131.78   12.08
  -2   7  -2  135.23   10.40
  -2   7  -3   44.81    6.12
   2   7   3   51.33    7.72
  -2   7  -4    2.22    2.16
   2   7   4    2.15    2.81
  -2   7  -5   27.43    4.89
   2   7   5   30.34    6.04
   2   7   6   33.97    6.28
  -2   7  -6   31.70    5.05
  -2   7  -7  486.55   20.31
   2   7   7  456.42   23.84
  -2   7  -8   11.37    3.66
  -2   7  -9  417.11   18.04
  -2   8   7   86.05    8.13
  -2   8   6   10.20    3.31
  -2   8   5   23.12    4.75
  -2   8   4   23.71    4.77
  -2   8   3  374.75   18.37
  -2   8   3  336.37   19.22
  -2   8   2    3.23    2.59
  -2   8   2   -0.95    2.77
  -2   8   1   39.25    5.97
  -2   8   1   30.63    5.86
  -2   8   0    6.03    2.87
  -2   8   0    9.11    3.57
  -2   8  -1    5.30    3.06
  -2   8  -1   11.58    3.95
  -2   8  -2   60.13    7.69
   3   0 -31  208.76   15.08
   3   0 -30    2.05    3.14
   3   0 -29  181.69   13.80
   3   0 -29  173.75   13.35
   3   0 -28    1.93    2.52
   3   0 -28   -0.98    2.56
   3   0 -27  246.02   15.36
   3   0 -27  216.18    9.43
   3   0 -27  221.14   14.84
   3   0 -26   -0.91    2.06
   3   0 -26    0.70    1.33
   3   0 -26    0.93    2.44
   3   0 -25 1127.13   31.41
   3   0 -25 1260.62   40.76
   3   0 -24    0.73    1.54
   3   0 -24    0.89    2.32
   3   0 -23   18.77    2.82
   3   0 -23   32.78    5.48
   3   0 -22    1.11    1.08
   3   0 -22   -0.84    2.45
   3   0 -21   10.93    2.22
   3   0 -21   16.32    3.78
   3   0 -20   -0.79    1.93
   3   0 -19 2669.25   71.76
   3   0 -18   -0.74    2.04
   3   0 -17 1369.66   41.66
   3   0 -16    0.68    1.41
   3   0 -15  102.42    8.16
   3   0 -14    1.87    1.52
   3   0 -13 2159.52   57.74
   3   0 -12   -0.56    1.16
   3   0 -11 3404.09   83.70
   3   0 -10    0.50    1.40
   3   0  -9 3088.07   75.89
   3   0  -8    1.33    0.92
   3   0  -7   41.32    4.15
   3   0  -7   44.64    3.71
   3   0  -6    0.31    0.70
   3   0  -6   -0.38    0.71
   3   0  -5 3368.35   78.62
   3   0  -4    5.91    1.39
  -3   0   4   -0.26    0.67
  -3   0   3 7666.19  170.71
   3   0  -3 7709.87  171.44
  -3   0   2    1.40    1.06
  -3   0   2    1.19    0.94
  -3   0   1 2366.02   55.25
  -3   0   1 2328.91   56.32
  -3   0   0    2.29    1.02
   3   0   0   -0.18    0.61
   3   0   1  824.27   20.48
  -3   0  -1  807.78   22.87
  -3   0  -2    0.59    0.82
   3   0   2    0.90    0.51
  -3   0  -3 9469.58  209.86
   3   0   3 9455.74  205.54
  -3   0  -4    0.31    0.57
   3   0   5 4540.93  102.23
  -3   0  -5 4618.24  104.92
   3   0   6    0.19    0.64
  -3   0  -6   -0.32    0.59
   3   0   7 1402.42   34.07
  -3   0  -7 1379.02   36.29
  -3   0  -8    1.77    0.81
   3   0   8    0.22    0.58
  -3   0  -8    2.06    1.10
   3   0   9 1187.88   30.55
  -3   0  -9 1221.46   31.30
  -3   0  -9 1201.98   32.68
  -3   0 -10    1.10    1.27
   3   0  10    0.77    0.67
  -3   0 -10    0.61    0.74
  -3   0 -10    0.27    0.31
  -3   0 -11 1709.94   42.80
  -3   0 -11 1662.90   38.79
  -3   0 -11 1728.85   43.78
  -3   0 -12    1.18    1.36
  -3   0 -12    1.80    1.49
  -3   0 -12    0.30    0.67
  -3   0 -13 9230.45  205.06
  -3   0 -13 9206.71  200.53
  -3   0 -13 8842.12  204.98
  -3   0 -14    1.21    1.35
  -3   0 -14    0.42    1.16
  -3   0 -14    2.72    1.08
  -3   0 -15  121.89    7.47
  -3   0 -15  112.34    5.49
  -3   0 -16    0.41    1.20
  -3   0 -16    0.79    0.91
  -3   0 -16    0.96    1.40
  -3   0 -17    9.43    2.15
  -3   0 -17    8.37    1.72
  -3   0 -17   14.86    2.81
  -3   0 -18    1.23    1.20
  -3   0 -18    2.72    2.13
  -3   0 -18    0.62    1.04
  -3   0 -19 1098.92   33.78
  -3   0 -19 1117.49   30.17
  -3   0 -19 1117.82   31.35
  -3   0 -20    1.61    1.39
  -3   0 -20   -0.60    1.58
  -3   0 -20    1.78    1.23
  -3   0 -21  848.92   28.54
  -3   0 -21  840.85   24.74
  -3   0 -21  828.79   24.95
  -3   0 -22   -0.39    1.21
  -3   0 -22    1.99    1.94
  -3   0 -22    1.20    1.17
  -3   0 -23  230.77   13.09
  -3   0 -23  228.66   10.57
  -3   0 -23  225.93   10.16
  -3   0 -24    1.51    1.35
  -3   0 -24    1.44    2.10
  -3   0 -24    0.44    1.28
  -3   0 -25  339.71   16.89
  -3   0 -25  337.24   13.93
  -3   0 -25  353.78   13.02
  -3   0 -26   -0.34    1.25
  -3   0 -26    0.78    1.90
  -3   0 -26   -0.47    1.30
  -3   0 -27  454.17   20.90
  -3   0 -27  489.94   17.79
  -3   0 -28    2.49    2.87
  -3   0 -29  480.76   22.00
   3   1 -30    9.48    3.89
   3  -1 -30    2.01    2.63
   3   1 -29  159.68   13.20
   3  -1 -29  196.50   14.00
   3  -1 -28   71.48    8.71
   3  -1 -28   59.98    8.07
   3   1 -28   66.21    8.33
   3  -1 -27   53.91    7.52
   3  -1 -27   45.49    6.76
   3   1 -27   54.83    7.62
   3  -1 -26  416.51   21.51
   3   1 -26  441.53   21.92
   3  -1 -26  428.42   21.30
   3  -1 -25   76.79    8.52
   3   1 -25   70.48    8.29
   3  -1 -25   94.15    9.02
   3  -1 -24   39.04    5.99
   3   1 -24   45.57    6.48
   3  -1 -24   34.31    5.81
   3  -1 -23  622.90   26.14
   3   1 -23  645.62   26.58
   3  -1 -23  609.55   25.56
   3  -1 -22   19.42    4.38
   3  -1 -22   29.15    5.08
   3   1 -22   36.15    5.85
   3  -1 -21  655.03   18.47
   3  -1 -21  711.36   27.29
   3   1 -21  660.86   26.83
   3  -1 -21  696.51   26.71
   3  -1 -20  534.24   15.81
   3  -1 -20  539.11   22.75
   3   1 -20  538.93   23.18
   3  -1 -20  527.46   22.49
   3  -1 -19    5.29    2.61
   3  -1 -19    5.54    1.47
   3   1 -19    8.05    2.79
   3  -1 -19    9.18    3.17
   3   1 -18 1175.38   37.86
   3  -1 -18 1186.09   37.42
   3  -1 -18 1105.78   29.46
   3   1 -17  361.88   17.34
   3  -1 -17  331.79   11.78
   3  -1 -17  362.24   17.12
   3  -1 -16   10.43    1.84
   3  -1 -16    6.89    2.39
   3   1 -16   10.78    3.05
   3  -1 -16    8.45    2.84
   3  -1 -15  986.08   31.72
   3   1 -15  940.62   31.73
   3  -1 -15  943.83   25.91
   3  -1 -14    1.23    1.14
   3  -1 -14    2.99    1.07
   3   1 -14   -0.66    1.37
   3  -1 -13  777.94   26.04
   3   1 -13  757.64   26.51
   3  -1 -13  747.93   21.68
   3  -1 -12  622.27   18.59
   3   1 -12  606.25   22.49
   3  -1 -11    1.21    1.12
   3   1 -11    1.71    1.18
   3  -1 -10 1635.74   41.33
   3   1 -10 1656.01   45.23
   3  -1  -9  514.98   16.28
   3   1  -9  518.18   18.85
   3  -1  -8  278.61   10.68
   3   1  -8  293.71   12.63
  -3   1   8  282.54   10.26
   3  -1  -7 3756.94   88.61
   3   1  -7 3905.23   90.98
  -3   1   7 3838.20   88.09
  -3   1   6  628.79   20.45
   3  -1  -6  678.74   19.84
   3   1  -6  670.23   21.30
  -3   1   6  677.23   19.40
  -3   1   5 1313.48   34.92
   3  -1  -5 1297.44   34.23
  -3  -1   5 1290.19   34.96
  -3   1   5 1365.54   34.03
   3  -1  -4 1256.18   32.18
  -3   1   4 1189.44   32.60
  -3  -1   4 1192.05   32.12
  -3   1   3   18.98    2.50
   3   1  -3   17.34    1.83
  -3  -1   3   19.79    2.37
   3   1  -2 2805.35   64.89
  -3   1   2 2989.73   67.98
  -3  -1   2 2806.87   66.81
   3   1  -1 2293.17   51.69
  -3  -1   1 2185.11   53.41
  -3   1   0  159.04    7.59
  -3  -1   0  146.82    5.11
  -3  -1   0  153.49    6.46
  -3  -1  -1 3844.84   85.55
  -3   1  -1 3848.22   89.99
  -3  -1  -1 3772.47   87.23
   3   1   1 3951.21   87.21
  -3   1  -2 1356.19   34.75
  -3  -1  -2 1281.30   31.41
   3   1   2 1267.19   31.23
   3   1   3   18.80    1.71
  -3  -1  -3   18.91    1.78
  -3  -1  -4 4353.04   96.90
   3   1   4 4337.98   99.37
   3   1   5  450.50   14.95
   3  -1   5  442.51   12.51
  -3  -1  -5  455.71   12.31
   3   1   5  443.50   14.31
   3   1   6  801.05   22.95
  -3  -1  -6  783.05   19.60
   3  -1   6  788.26   19.93
   3   1   6  779.90   21.84
   3   1   7 1492.43   38.80
  -3  -1  -7 1533.31   35.10
   3  -1   7 1476.71   35.38
   3   1   7 1467.28   37.38
   3   1   8  651.20   20.45
  -3  -1  -8  641.02   16.87
   3  -1   8  670.29   17.27
   3   1   8  680.41   19.17
   3   1   9 3188.56   73.94
  -3   1  -9 3237.09   71.17
  -3  -1  -9 3255.12   77.05
   3   1   9 3150.39   75.88
   3  -1   9 3075.94   72.02
  -3   1 -10  548.88   15.27
  -3  -1 -10  582.07   19.64
   3   1  10  580.72   18.84
  -3   1 -10  571.47   15.85
   3  -1  10  576.14   15.65
  -3   1 -11  161.76    6.36
  -3  -1 -11  153.34    8.80
   3   1  11  145.73    8.10
  -3   1 -11  157.32    6.47
   3  -1  11  154.83    6.26
  -3   1 -12  143.35    6.32
  -3  -1 -12  136.57    8.54
   3   1  12  148.37    8.29
  -3   1 -12  138.94    6.29
   3  -1  12  151.01    6.26
  -3  -1 -13   70.20    6.15
  -3   1 -13   79.55    4.76
   3   1  13   83.71    6.19
  -3   1 -13   85.96    4.87
   3  -1  13   83.54    4.60
  -3   1 -14  981.00   26.44
  -3  -1 -14  965.41   30.42
   3   1  14  973.31   29.07
  -3   1 -14  965.64   26.13
  -3  -1 -14  962.45   25.45
   3  -1  14  979.26   25.92
  -3  -1 -15 1533.01   43.58
  -3   1 -15 1517.32   39.23
  -3   1 -15 1554.10   38.80
  -3  -1 -15 1511.10   37.89
  -3   1 -16   57.26    4.66
  -3  -1 -16   65.25    6.34
  -3   1 -16   63.90    4.57
  -3  -1 -16   62.12    4.20
  -3   1 -17  910.88   26.60
  -3  -1 -17  871.03   29.87
  -3   1 -17  912.96   25.71
  -3  -1 -17  911.05   25.07
  -3   1 -18  381.70   14.57
  -3  -1 -18  380.77   17.52
  -3   1 -18  371.90   13.82
  -3  -1 -18  379.03   13.28
  -3   1 -19  468.36   17.01
  -3  -1 -19  460.83   19.96
  -3   1 -19  449.62   15.93
  -3  -1 -19  447.00   15.45
  -3   1 -20  925.76   28.07
  -3  -1 -20  937.20   32.09
  -3   1 -20  902.26   26.89
  -3  -1 -20  897.59   26.11
  -3   1 -21  232.33   11.65
  -3  -1 -21  258.00   14.49
  -3   1 -21  241.79   11.05
  -3  -1 -21  232.35   10.34
  -3   1 -22  128.07    8.64
  -3   1 -22  133.73    8.69
  -3  -1 -22  126.00   10.28
  -3   1 -22  142.84    8.29
  -3  -1 -22  138.88    7.65
  -3   1 -23  285.84   13.62
  -3   1 -23  290.04   12.76
  -3  -1 -23  292.73   12.21
  -3   1 -23  313.99   14.21
  -3  -1 -23  264.15   15.62
  -3   1 -24   26.66    4.01
  -3  -1 -24   42.87    4.36
  -3   1 -24   35.47    4.30
  -3   1 -24   35.17    4.70
  -3  -1 -24   35.86    5.90
  -3   1 -25  283.16   13.43
  -3   1 -25  308.50   13.44
  -3  -1 -25  301.03   12.74
  -3   1 -25  272.61   13.97
  -3  -1 -25  311.81   16.99
  -3   1 -26  225.25   11.73
  -3  -1 -26  247.65   11.46
  -3   1 -26  242.95   11.86
  -3   1 -26  244.72   13.19
  -3  -1 -26  235.48   15.07
  -3   1 -27    5.87    2.21
  -3  -1 -27    4.67    3.35
  -3   1 -27    6.86    2.49
  -3  -1 -28  135.31   11.79
  -3  -1 -29   13.71    4.16
  -3  -1 -30   47.15    7.43
   3   2 -29    3.29    3.20
   3  -2 -29    5.06    2.96
   3   2 -28   29.01    5.92
   3  -2 -28   39.56    6.50
   3  -2 -27   22.67    5.37
   3   2 -27   27.54    5.65
   3  -2 -27   24.20    5.09
   3  -2 -26   47.55    7.51
   3  -2 -26   42.98    7.13
   3   2 -26   66.50    8.49
   3  -2 -26   45.57    6.71
   3  -2 -25  125.03   11.68
   3  -2 -25  138.83   12.06
   3   2 -25  138.33   12.02
   3  -2 -25  141.31   11.54
   3  -2 -24  854.60   33.23
   3  -2 -24  811.58   32.43
   3   2 -24  810.99   32.24
   3  -2 -24  793.70   31.03
   3  -2 -23    6.01    2.93
   3  -2 -23    5.80    2.96
   3   2 -23    6.79    3.35
   3  -2 -23    3.58    2.87
   3  -2 -22  372.47   19.82
   3  -2 -22  411.36   20.51
   3   2 -22  357.85   19.57
   3  -2 -22  378.92   19.27
   3  -2 -21   35.19    5.88
   3  -2 -21   54.03    7.09
   3   2 -21   38.00    6.06
  -3  -2  21   48.08    6.63
   3  -2 -20  823.14   30.97
   3  -2 -20  789.93   30.67
   3   2 -20  828.14   31.18
  -3  -2  20  784.88   29.77
   3  -2 -19  308.74   16.89
   3  -2 -19  302.08   16.93
   3   2 -19  341.01   17.83
  -3  -2  19  322.30   16.59
   3  -2 -18  311.93   16.49
   3  -2 -18  306.81   16.70
   3   2 -18  315.25   16.95
  -3  -2  18  296.17   15.63
   3  -2 -17   77.56    7.72
   3  -2 -17   71.76    7.55
   3   2 -17   56.43    6.88
  -3  -2  17   65.92    6.84
   3  -2 -16  645.46   25.02
   3  -2 -16  646.24   25.36
   3   2 -16  650.84   25.68
  -3  -2  16  619.25   24.05
   3  -2 -15  128.16    9.42
   3  -2 -15  132.66    9.88
   3   2 -15  108.76    9.12
  -3  -2  15  111.00    8.67
   3  -2 -14 2855.37   74.47
   3   2 -14 2808.54   75.09
   3  -2 -14 2901.90   75.09
   3  -2 -13  177.67   11.05
   3   2 -13  190.09   11.65
   3  -2 -12   76.96    6.88
   3   2 -12   82.34    7.28
  -3   2  12   67.67    4.34
   3  -2 -11   85.99    7.01
   3   2 -11   85.06    7.35
  -3   2  11   84.60    4.97
   3  -2 -10  116.63    8.08
   3   2 -10  109.16    8.13
  -3   2  10  115.86    6.10
   3  -2  -9  524.73   19.60
   3   2  -9  530.46   20.09
  -3   2   9  530.58   16.66
   3  -2  -8 1838.86   50.13
   3   2  -8 1918.17   50.83
  -3   2   8 1894.22   46.92
  -3   2   7  341.87   12.46
   3  -2  -7  331.58   14.18
   3   2  -7  324.21   14.27
  -3   2   6 1917.24   47.37
   3   2  -6 1776.12   49.31
   3  -2  -6 1922.20   48.71
  -3   2   5  533.25   17.36
  -3  -2   5  509.84   18.09
   3  -2  -5  516.64   17.45
  -3  -2   4  512.88   18.02
   3  -2  -4  537.09   17.25
  -3  -2   3 1553.77   39.90
   3  -2  -3 1481.53   38.37
  -3  -2   2 1752.92   45.55
   3  -2  -2 1797.29   43.77
   3   2  -1    1.78    0.53
   3  -2  -1    1.69    0.97
  -3  -2   1    3.64    1.43
   3  -2   0 3454.12   78.65
   3   2   0 3439.63   81.33
  -3  -2   0 3443.84   81.40
   3  -2   1   11.16    1.49
   3   2   1   14.13    2.24
  -3  -2  -1   13.62    2.26
   3  -2   2 6965.82  155.29
  -3  -2  -2 6889.25  158.86
   3   2   2 7419.88  158.73
  -3  -2  -3  316.07   11.73
  -3  -2  -4   12.40    2.05
   3  -2   4   15.02    2.22
   3  -2   5  653.84   19.75
  -3  -2  -5  658.04   19.53
  -3  -2  -6    2.15    1.03
   3  -2   6    5.04    1.37
   3  -2   7  529.59   16.86
  -3  -2  -7  542.85   16.81
   3  -2   8 3218.14   75.99
  -3  -2  -8 3173.62   75.74
   3   2   8 3286.42   75.57
   3   2   9    1.12    0.82
   3   2   9    0.51    1.33
   3  -2   9    0.32    1.18
   3   2  10  984.84   29.98
   3  -2  10  958.17   26.81
   3   2  10  969.86   25.95
   3   2  11  176.43   10.08
  -3   2 -11  189.45    5.62
  -3  -2 -11  190.52   11.23
   3  -2  11  187.13    8.51
   3   2  11  191.75    7.76
   3   2  12  182.13   10.38
  -3  -2 -12  201.68   11.71
  -3   2 -12  187.24    6.14
   3  -2  12  192.30    8.74
   3   2  12  191.09    7.68
   3   2  13  120.65    5.55
   3   2  13  111.52    8.01
  -3   2 -13  108.32    4.66
  -3  -2 -13  109.65    8.66
   3  -2  13  123.74    6.74
  -3   2 -13  116.17    6.87
   3   2  14 1210.11   35.93
  -3  -2 -14 1181.97   37.54
  -3   2 -14 1168.13   29.13
  -3   2 -14 1187.74   33.00
   3  -2  14 1175.96   32.40
  -3   2 -15    4.68    1.24
   3   2  15    6.67    2.38
  -3  -2 -15    6.60    2.45
  -3   2 -15    5.13    1.68
   3  -2  15    3.74    1.63
   3   2  16  789.26   27.00
  -3  -2 -16  761.31   28.40
  -3   2 -16  756.20   21.34
  -3   2 -16  775.52   24.42
   3  -2  16  820.06   23.73
   3   2  17    0.64    1.45
  -3   2 -17    0.85    1.05
  -3  -2 -17    0.79    1.64
  -3   2 -17    1.40    1.29
   3  -2  17    2.00    1.43
  -3  -2 -18  983.40   34.52
  -3   2 -18  994.32   26.97
  -3   2 -18  964.49   29.48
  -3  -2 -19  243.17   14.62
  -3   2 -19  237.45   10.00
  -3   2 -19  241.66   11.71
  -3  -2 -20   -0.88    1.99
  -3   2 -20    1.49    1.54
  -3   2 -20    0.53    1.38
  -3  -2 -20    0.44    1.16
  -3  -2 -21   26.45    5.02
  -3   2 -21   29.51    3.56
  -3   2 -21   26.70    3.91
  -3  -2 -21   27.08    3.59
  -3   2 -22  454.05   16.31
  -3  -2 -22  417.35   21.28
  -3   2 -22  430.46   17.68
  -3  -2 -22  444.40   16.59
  -3  -2 -23   38.77    6.56
  -3   2 -23   36.28    4.24
  -3   2 -23   31.94    4.59
  -3  -2 -23   38.02    4.41
  -3   2 -24 1214.57   34.11
  -3  -2 -24 1164.60   40.97
  -3   2 -24 1152.44   35.43
  -3  -2 -24 1152.84   33.78
  -3   2 -25    3.03    2.03
  -3  -2 -25    1.02    2.98
  -3   2 -25    0.60    1.85
  -3  -2 -25   -0.49    1.70
  -3  -2 -26  111.00   11.07
  -3   2 -26  109.38    8.34
  -3  -2 -26  128.88    8.13
  -3  -2 -27  148.14   12.83
  -3  -2 -28   37.34    6.93
   3  -3 -28   73.73    9.03
   3   3 -27   24.19    5.65
   3  -3 -27   14.77    4.79
   3  -3 -26  450.26   23.73
   3   3 -26  395.17   22.20
   3  -3 -26  411.87   21.74
   3  -3 -25    6.80    3.47
   3   3 -25   12.35    4.52
  -3  -3  25    6.95    3.31
   3  -3 -24  217.00   15.52
   3  -3 -24  208.04   15.65
   3   3 -24  217.82   15.58
  -3  -3  24  216.70   14.62
   3  -3 -23   17.96    4.89
   3  -3 -23   17.57    4.87
   3   3 -23    6.52    3.34
  -3  -3  23    9.30    3.65
   3  -3 -22   13.24    4.00
   3  -3 -22   12.86    4.09
   3   3 -22   21.34    5.32
  -3  -3  22   12.57    3.81
   3  -3 -21  109.56   10.36
   3  -3 -21   96.08   10.06
   3   3 -21   89.16    9.63
  -3  -3  21   97.68    9.36
   3  -3 -20  656.18   27.26
   3  -3 -20  657.99   28.14
   3   3 -20  601.34   27.27
  -3  -3  20  631.79   26.04
   3  -3 -19    8.08    3.22
   3  -3 -19   12.81    3.97
   3   3 -19    2.00    2.44
  -3  -3  19    7.39    2.63
   3  -3 -18 1016.44   35.66
   3  -3 -18 1068.91   37.56
   3   3 -18 1019.02   37.17
  -3  -3  18 1017.30   34.93
   3  -3 -17  167.68   11.74
   3   3 -17  140.43   11.58
  -3  -3  17  161.13   11.23
   3  -3 -16  253.06   14.85
   3   3 -16  285.98   16.36
  -3  -3  16  302.13   15.52
   3  -3 -15   25.08    4.46
   3   3 -15   13.12    3.64
  -3   3  15   22.53    2.43
  -3  -3  15   26.37    4.41
   3  -3 -14   32.10    5.00
   3   3 -14   28.63    5.21
  -3   3  14   34.75    3.22
   3  -3 -13  205.88   12.42
   3   3 -13  211.06   13.33
  -3   3  13  235.17    9.43
   3  -3 -12 1093.49   34.84
   3   3 -12 1108.33   36.51
  -3   3  12 1072.17   29.68
  -3   3  11   20.47    2.80
   3   3 -11   28.59    4.58
   3  -3 -11   21.95    3.94
   3  -3 -11   19.43    3.87
  -3   3  10 1322.17   38.48
  -3   3  10 1395.00   36.34
   3   3 -10 1297.21   41.22
  -3  -3  10 1219.73   39.26
   3  -3 -10 1480.81   41.30
  -3   3   9  398.85   14.76
  -3   3   9  401.82   16.33
   3   3  -9  394.28   17.81
  -3  -3   9  360.68   16.72
   3  -3  -9  390.64   16.88
  -3   3   8  596.82   20.86
   3   3  -8  550.03   21.75
  -3  -3   8  558.67   21.57
   3  -3  -8  550.87   20.93
  -3   3   7  250.93   12.09
  -3  -3   7  234.11   12.37
   3   3  -7  231.25   12.78
  -3   3   6  265.36   12.27
   3   3  -6  200.28   12.11
  -3   3   5  383.09   15.58
  -3  -3   5  341.51   15.31
  -3   3   4 3686.55   86.47
  -3  -3   4 3415.86   86.39
   3  -3  -4 3469.94   84.67
  -3  -3   3  300.30   13.43
   3  -3  -3  276.02   11.84
  -3  -3   2 2052.39   54.60
   3  -3  -2 2110.64   52.44
  -3  -3   1   15.19    2.94
   3   3  -1   11.22    2.55
   3  -3  -1   13.22    2.26
  -3   3   1   14.61    2.33
   3   3   0  623.08   21.57
  -3  -3   0  627.53   21.61
   3  -3   0  626.15   19.25
  -3   3   0  645.46   19.13
  -3  -3  -1  427.00   16.64
  -3   3  -1  442.42   14.35
   3  -3   1  453.66   14.62
  -3  -3  -2  217.91   10.71
  -3   3  -2  211.57    8.46
   3   3   2  206.10   11.45
  -3  -3  -3   17.87    3.10
  -3   3  -3   18.73    2.12
   3   3   3   24.40    3.83
  -3  -3  -4 2950.19   73.48
  -3   3  -4 2956.10   68.60
   3   3   4 3100.18   75.66
  -3  -3  -5    5.17    1.80
   3   3   5    7.83    2.56
  -3   3  -5    8.76    1.33
  -3  -3  -6 1368.55   37.66
  -3   3  -6 1330.81   32.04
  -3  -3  -7  235.65   11.33
  -3   3  -7  243.10    7.55
  -3  -3  -8   25.48    3.49
  -3   3  -8   23.57    1.72
  -3  -3  -9  416.40   12.28
  -3  -3  -9  405.17   15.97
  -3   3  -9  407.67   10.83
  -3  -3 -10  293.86   10.14
  -3   3 -10  297.99    8.24
  -3  -3 -10  286.76   12.93
  -3  -3 -11  119.41    6.05
  -3   3 -11  122.75    4.33
  -3  -3 -11  128.84    8.03
   3   3  11  125.02    6.58
  -3   3 -12 1116.14   27.07
   3   3  12 1258.87   37.24
  -3  -3 -12 1150.01   30.50
   3   3  12 1205.44   30.65
  -3  -3 -13    6.22    1.60
   3   3  13    3.84    1.32
  -3  -3 -14 1645.65   41.38
  -3   3 -14 1540.72   36.54
   3   3  14 1613.86   46.64
  -3  -3 -14 1580.08   48.66
   3  -3  14 1616.00   43.13
   3   3  14 1537.87   38.40
   3   3  15  258.84    8.91
  -3   3 -15  257.94    8.31
   3   3  15  298.49   15.22
  -3  -3 -15  281.36   16.26
   3  -3  15  268.00   12.40
  -3   3 -16    2.55    0.91
   3   3  16    5.24    2.50
  -3  -3 -16    2.76    1.90
   3  -3  16    2.56    1.50
   3   3  17   61.95    6.90
  -3   3 -17   70.51    3.94
  -3  -3 -17   71.03    8.20
   3  -3  17   63.87    5.82
   3   3  18  454.30   20.16
  -3   3 -18  434.03   13.20
  -3  -3 -18  431.19   21.81
  -3   3 -18  417.11   17.82
   3  -3  18  426.60   17.06
   3   3  19  211.66   13.26
  -3   3 -19  203.93    8.07
  -3  -3 -19  214.33   14.84
  -3   3 -19  215.02   12.03
   3  -3  19  195.76   10.83
  -3   3 -20 1296.62   33.65
  -3   3 -20 1340.70   39.95
   3  -3  20 1328.80   38.44
  -3   3 -21    2.95    1.34
  -3  -3 -21    3.21    2.96
  -3   3 -21    1.33    1.84
   3  -3  21    0.56    1.63
  -3  -3 -22  243.23   16.63
  -3   3 -22  236.87    9.64
  -3   3 -22  234.05   13.16
   3  -3  22  220.35   11.90
  -3  -3 -23   20.39    5.14
  -3   3 -23   18.90    2.86
  -3   3 -23    9.67    3.15
   3  -3  23   22.22    3.80
  -3  -3 -24   12.72    4.55
  -3   3 -24   19.65    4.17
   3  -3  24   25.18    4.09
  -3  -3 -24   16.79    3.53
  -3   3 -25   85.88    7.79
  -3  -3 -25   87.96    7.39
   3  -4 -25  271.04   18.17
   3   4 -25  239.20   17.54
   3  -4 -24   93.07   10.44
   3   4 -24   87.15   10.37
   3  -4 -23   -1.08    3.00
   3   4 -23    1.20    3.31
  -3  -4  23   -0.99    2.23
   3  -4 -22   83.46    9.31
   3  -4 -22   78.77    9.91
   3   4 -22   70.79    9.22
  -3  -4  22   90.78    9.43
   3  -4 -21   11.04    3.71
   3   4 -21    5.76    3.53
  -3  -4  21    7.57    3.28
   3  -4 -20  197.55   13.90
   3   4 -20  164.33   13.65
  -3  -4  20  185.90   13.16
   3  -4 -19  783.69   30.53
   3   4 -19  724.43   31.63
  -3  -4  19  799.02   30.55
   3  -4 -18   57.46    7.48
   3   4 -18   61.25    8.29
  -3  -4  18   59.52    7.31
   3  -4 -17   61.30    7.37
   3   4 -17   74.49    8.90
  -3   4  17   69.60    4.34
  -3  -4  17   67.76    7.80
   3  -4 -16   46.03    7.03
   3   4 -16   38.88    6.47
  -3  -4  16   40.02    6.05
  -3   4  16   37.39    3.65
  -3   4  15    3.14    1.37
   3  -4 -15    6.70    2.93
   3   4 -15    6.97    3.32
  -3  -4  15    1.67    2.18
   3  -4 -14 1166.21   39.69
   3   4 -14 1121.97   39.83
  -3   4  14 1148.32   31.63
  -3   4  13  846.14   25.20
   3   4 -13  782.79   31.32
   3  -4 -13  838.07   31.31
  -3   4  12   47.03    4.68
   3   4 -12   38.28    6.02
   3  -4 -12   33.22    5.44
  -3   4  11  249.48   11.53
   3  -4 -11  210.24   13.33
   3   4 -11  231.73   14.43
  -3   4  10   12.05    3.11
   3  -4 -10   14.94    3.66
   3   4 -10   13.77    3.91
  -3  -4  10   13.63    3.51
  -3   4   9 1652.92   46.02
   3   4  -9 1670.59   49.72
  -3  -4   9 1627.88   48.10
   3  -4  -9 1540.30   47.12
  -3   4   8 1233.76   36.61
   3   4  -8 1169.65   39.04
  -3  -4   8 1235.25   38.61
   3  -4  -8 1167.42   37.30
  -3   4   7    4.86    1.95
   3   4  -7    8.61    2.90
  -3  -4   7    4.27    2.08
   3  -4  -7    7.79    2.48
  -3   4   6  161.44   10.05
  -3  -4   6  167.41   10.96
   3  -4  -6  173.86   10.60
  -3   4   5  269.33   13.48
  -3  -4   5  270.28   14.25
   3  -4  -5  263.49   13.22
  -3   4   4  792.75   26.89
  -3  -4   4  768.32   27.42
   3  -4  -4  768.12   25.87
  -3   4   4  793.55   25.80
  -3   4   3 1275.94   39.16
  -3  -4   3 1361.95   40.63
  -3   4   3 1354.91   37.94
  -3  -4   2  287.46   14.57
  -3   4   2  301.61   13.16
  -3  -4   1  384.57   16.90
  -3   4   1  351.15   14.41
  -3  -4   0  309.77   15.21
  -3   4   0  361.66   13.98
   3   4   0  332.75   16.56
   3   4   1    1.81    0.53
  -3   4  -1    2.04    1.36
   3   4   1    1.45    1.77
  -3  -4  -1    1.27    1.76
  -3   4  -2  470.64   16.07
   3   4   2  439.50   19.63
   3  -4   2  421.68   18.28
  -3  -4  -2  462.51   18.93
  -3   4  -3 1195.90   32.84
   3   4   3 1197.44   38.50
   3  -4   3 1259.99   37.32
  -3  -4  -3 1197.85   36.92
   3   4   4    9.56    3.12
  -3   4  -4    9.05    1.89
   3  -4   4    4.39    2.32
  -3  -4  -4   10.72    2.98
   3   4   5  469.67   20.54
  -3   4  -5  469.55   15.35
   3  -4   5  481.40   19.41
  -3  -4  -5  467.04   19.35
  -3   4  -6    5.85    1.53
   3   4   6    4.51    2.20
  -3  -4  -6    2.56    1.87
   3  -4   6    4.99    2.24
   3   4   7  667.69   25.91
  -3   4  -7  698.86   19.61
   3  -4   7  652.22   23.99
  -3  -4  -7  661.77   24.54
  -3   4  -8 1353.72   34.28
   3   4   8 1342.32   42.33
   3  -4   8 1373.18   40.27
  -3  -4  -8 1383.67   40.79
  -3   4  -9  172.80    7.16
   3  -4   9  194.00   11.07
  -3  -4  -9  183.12   11.06
  -3   4 -10  104.06    5.10
   3  -4  10   91.60    7.50
  -3  -4 -10   98.42    8.00
  -3   4 -11  235.79    8.34
  -3  -4 -11  215.26   12.41
   3  -4  11  229.92   12.43
  -3   4 -12    4.93    1.30
   3  -4  12    3.12    1.73
  -3  -4 -12    4.60    2.19
  -3   4 -13 1027.34   25.90
  -3  -4 -13 1042.76   33.34
   3  -4  13 1051.53   32.98
  -3  -4 -14  290.39   11.55
  -3   4 -14  297.17    9.45
   3  -4  14  305.18   14.70
  -3  -4 -14  292.21   14.72
   3   4  14  298.78   11.37
  -3  -4 -15  364.27   13.99
  -3   4 -15  367.66   11.23
   3   4  15  379.14   19.00
   3  -4  15  401.17   17.37
  -3  -4 -15  408.61   17.74
   3   4  15  394.56   13.04
  -3  -4 -16  247.66   11.10
  -3   4 -16  229.49    7.93
   3   4  16  242.86   14.78
   3  -4  16  258.09   13.31
   3   4  16  236.78    8.77
   3   4  17   -1.78    2.17
  -3   4 -17    1.30    0.86
  -3  -4 -17    1.88    1.51
   3   4  17    0.34    0.69
   3  -4  17   -0.65    1.58
  -3  -4 -18  213.06   10.95
   3   4  18  242.67   14.91
  -3   4 -18  213.58    7.33
  -3   4 -18  210.59    7.55
   3  -4  18  226.22   12.56
   3   4  19  438.95   21.35
  -3   4 -19  423.81   12.40
  -3  -4 -19  447.24   17.56
   3  -4  19  465.23   19.05
   3   4  20   43.75    6.65
  -3   4 -20   53.28    3.31
  -3  -4 -20   54.19    5.87
   3  -4  20   53.77    6.05
  -3  -4 -21  362.02   16.38
   3  -4  21  365.77   16.89
  -3  -4 -22   28.61    4.73
   3  -4  22   31.96    4.99
  -3  -4 -23   70.77    7.20
   3  -4  23   73.94    7.32
   3  -4  24  271.15   14.41
   3  -4  25   10.47    3.54
   3  -4  26    5.68    2.46
   3   5 -21  282.25   19.51
   3   5 -20    1.28    3.12
  -3   5  19   16.47    2.06
   3   5 -19   11.26    4.34
  -3  -5  19   14.12    4.38
  -3   5  18    7.19    1.80
   3  -5 -18    7.11    3.46
   3   5 -18    9.80    3.92
  -3  -5  18    3.97    2.76
   3  -5 -17  120.95   11.62
   3   5 -17  127.21   12.34
  -3  -5  17  111.69   10.81
  -3   5  17  128.55    7.03
  -3   5  16    3.28    1.61
   3  -5 -16    2.20    2.87
   3   5 -16    1.17    2.42
  -3  -5  16    2.90    2.96
   3  -5 -15 1094.87   39.59
  -3  -5  15 1000.92   37.25
   3   5 -15 1082.80   40.45
  -3   5  15 1072.48   31.04
  -3   5  14    6.47    2.16
   3  -5 -14    7.11    3.51
   3   5 -14   11.09    3.97
  -3  -5  14    3.78    3.15
  -3   5  13  703.58   23.43
   3   5 -13  669.12   29.61
   3  -5 -13  635.04   27.73
   3   5 -12    1.05    2.57
   3  -5 -12    3.74    2.99
   3   5 -11    2.04    2.11
   3  -5 -11    3.59    2.75
  -3   5  10  102.35    8.35
   3   5 -10  106.16   10.13
  -3  -5  10   99.03    9.41
   3  -5 -10  118.98   10.08
  -3   5   9  508.45   20.32
  -3  -5   9  462.30   21.95
   3   5  -9  482.27   23.02
   3  -5  -9  478.32   21.65
  -3   5   8   67.97    6.77
  -3  -5   8   72.84    8.01
   3   5  -8   68.61    8.05
   3  -5  -8   64.30    7.42
  -3   5   7  973.14   31.27
  -3  -5   7  895.81   32.89
   3  -5  -7  941.79   32.25
  -3   5   6   18.50    3.92
  -3  -5   6   11.68    3.55
   3  -5  -6   19.52    4.06
  -3   5   6   21.20    3.96
  -3   5   5  670.67   25.55
  -3  -5   5  734.68   27.97
  -3   5   5  672.64   25.04
   3  -5  -5  707.99   26.25
  -3   5   4    8.43    2.76
  -3  -5   4    4.12    2.16
  -3   5   4    6.37    2.57
   3  -5  -4    5.58    2.41
  -3   5   3   35.53    5.33
  -3  -5   3   36.72    5.52
  -3   5   3   19.08    3.60
   3   5  -3   33.22    5.37
  -3  -5   2   44.53    6.09
  -3   5   2   56.50    5.82
   3   5  -2   58.94    7.11
  -3  -5   1 1213.57   39.24
  -3   5   1 1183.32   35.68
   3   5  -1 1184.70   39.62
   3   5   0   60.29    3.62
  -3  -5   0   56.70    6.84
   3  -5   0   60.26    6.96
  -3   5   0   50.02    5.49
   3   5   0   57.18    6.98
   3   5   1 1095.44   26.45
   3   5   1 1063.42   37.06
  -3   5  -1 1083.41   32.68
  -3  -5  -1 1125.86   36.80
   3  -5   1 1059.38   36.27
   3   5   2   40.29    6.20
  -3   5  -2   44.20    4.75
  -3  -5  -2   42.66    5.86
   3  -5   2   40.43    5.84
   3   5   3  814.07   30.95
  -3   5  -3  878.61   26.38
  -3  -5  -3  817.44   30.09
   3  -5   3  794.48   29.86
  -3   5  -4   27.87    3.71
   3   5   4   20.13    4.47
   3  -5   4   30.06    4.94
   3   5   5   94.93    9.05
  -3   5  -5   92.82    6.46
   3  -5   5   87.74    8.34
  -3  -5  -5   97.44    8.74
   3   5   6   56.53    7.19
  -3   5  -6   46.09    4.38
  -3  -5  -6   45.73    6.24
   3  -5   6   44.98    6.08
   3   5   7  791.96   30.68
  -3   5  -7  804.65   24.17
  -3  -5  -7  831.68   30.18
   3  -5   7  795.91   29.18
   3   5   8    4.54    3.14
  -3   5  -8    4.50    1.77
  -3  -5  -8    0.82    2.50
   3  -5   8    4.59    2.64
   3   5   9 1316.53   43.38
  -3   5  -9 1274.89   34.65
   3  -5   9 1366.47   41.71
  -3  -5  -9 1331.93   42.16
  -3   5 -10   66.14    4.87
   3   5  10   81.27    8.51
   3  -5  10   83.66    7.83
  -3  -5 -10   75.86    8.00
   3   5  11  377.59   19.64
  -3   5 -11  375.39   13.17
   3  -5  11  409.18   18.74
  -3  -5 -11  366.74   18.51
   3   5  12    9.45    3.38
  -3   5 -12    5.30    1.55
  -3  -5 -12    9.09    3.06
   3  -5  12    6.17    2.67
  -3   5 -13   40.06    3.44
   3  -5  13   29.14    4.92
  -3  -5 -13   40.44    5.91
  -3   5 -14    2.79    1.15
   3  -5  14   -0.77    1.87
  -3  -5 -14    1.66    2.42
  -3   5 -15  661.37   18.44
  -3  -5 -15  642.73   26.13
   3  -5  15  681.99   26.00
   3   5  16   12.06    2.23
  -3   5 -16   16.27    2.13
  -3  -5 -16   20.06    4.38
   3  -5  16   14.69    3.79
  -3   5 -17  457.40   13.24
   3  -5  17  494.76   21.19
  -3  -5 -17  493.17   21.80
   3   5  17  480.82   14.82
   3   5  18    4.88    1.22
   3   5  18    6.16    3.15
  -3  -5 -18   10.16    3.32
   3  -5  18    5.45    2.59
   3   5  19  351.62   19.63
   3  -5  19  324.38   16.76
  -3  -5 -19  309.44   16.90
  -3  -5 -20   35.92    5.77
   3  -5  20   53.19    6.49
  -3  -5 -21  201.85   13.62
   3  -5  21  224.97   13.86
   3  -5  22   43.29    5.94
   3  -5  23  171.49   12.12
   3  -5  24   12.73    3.76
  -3   6  18   47.31    4.47
  -3   6  17  206.21   10.32
  -3   6  16   67.27    6.03
  -3   6  15  101.99    7.71
   3   6 -15   90.77   10.95
  -3   6  14  156.24   10.14
   3  -6 -14  154.89   13.32
   3   6 -14  169.48   14.50
   3  -6 -13  263.27   17.37
   3   6 -13  262.29   18.03
   3  -6 -12   61.24    8.18
   3   6 -12   46.07    7.57
   3  -6 -11  110.33   10.48
   3  -6 -10    9.93    3.67
  -3   6  10    7.90    3.12
  -3  -6  10   11.14    3.75
  -3   6   9  457.34   20.28
  -3  -6   9  487.85   23.48
   3  -6  -9  507.11   23.43
  -3   6   8  119.73    9.58
  -3  -6   8  140.64   11.83
  -3   6   7   22.36    4.45
  -3  -6   7   31.47    5.71
   3   6  -7   34.54    6.14
  -3   6   6  228.04   13.60
  -3  -6   6  230.08   15.12
   3   6  -6  235.51   15.29
  -3   6   6  207.73   13.11
  -3   6   5   92.69    8.57
  -3  -6   5  112.37   10.60
  -3   6   5  104.50    9.11
   3   6  -5  103.04   10.13
  -3   6   4  147.77   11.04
  -3  -6   4  142.92   11.78
  -3   6   4  143.83   10.49
   3   6  -4  141.06   11.96
  -3   6   3 1300.46   40.93
  -3  -6   3 1299.15   43.30
  -3   6   3 1246.77   39.54
   3   6  -3 1222.91   42.81
  -3   6   2  242.50   14.40
  -3  -6   2  247.54   15.80
  -3   6   2  237.93   13.32
   3   6  -2  208.59   14.70
   3   6  -1   10.24    2.06
  -3  -6   1    9.63    3.78
   3  -6  -1    7.74    3.47
  -3   6   1   13.02    3.42
   3   6  -1    7.79    3.71
   3   6   0  431.65   13.06
   3  -6   0  402.09   20.78
  -3  -6   0  434.70   21.40
  -3   6   0  394.33   17.83
   3   6   0  391.91   20.83
   3   6   1    0.69    0.89
  -3   6  -1    0.64    1.88
   3   6   1    1.98    2.58
  -3  -6  -1    0.96    2.94
   3  -6   1    2.89    2.67
   3   6   2  357.91   19.90
  -3   6  -2  440.78   17.90
  -3  -6  -2  423.41   20.94
   3  -6   2  360.88   19.83
   3   6   3  534.29   24.83
  -3   6  -3  540.73   20.63
  -3  -6  -3  563.85   24.91
   3  -6   3  517.85   24.08
  -3   6  -4   29.81    4.49
   3   6   4   29.96    5.95
   3  -6   4   38.57    6.19
  -3  -6  -4   35.40    6.04
   3   6   5  495.80   23.89
  -3   6  -5  533.81   19.52
  -3  -6  -5  504.51   23.60
   3  -6   5  472.67   22.89
   3   6   6    9.19    3.78
  -3   6  -6   11.57    2.85
  -3  -6  -6   16.41    4.29
   3  -6   6   13.88    4.45
   3   6   7  279.65   17.31
  -3   6  -7  292.38   13.21
   3  -6   7  298.87   17.10
  -3  -6  -7  299.65   17.36
   3   6   8  291.60   17.83
  -3   6  -8  267.75   12.27
   3  -6   8  251.80   15.62
  -3  -6  -8  260.16   16.29
   3   6   9  201.84   14.47
  -3   6  -9  171.29    9.35
   3  -6   9  181.74   12.97
  -3  -6  -9  181.42   13.62
  -3   6 -10  193.39    9.72
   3   6  10  199.37   14.64
   3  -6  10  206.17   13.86
  -3  -6 -10  209.49   14.49
  -3   6 -11  139.10    7.75
   3  -6  11  124.73   10.95
  -3  -6 -11  154.62   12.39
  -3   6 -12   33.53    3.76
   3   6  12   32.11    6.29
  -3  -6 -12   27.70    5.52
   3  -6  12   24.68    5.11
   3   6  13  521.29   25.46
  -3  -6 -13  541.05   24.88
   3  -6  13  519.76   23.73
  -3  -6 -14    8.97    3.44
   3  -6  14    1.81    2.51
  -3  -6 -15   -1.00    2.92
   3  -6  15    2.71    2.36
   3  -6  16  219.49   14.63
  -3  -6 -16  249.89   16.01
  -3  -6 -17    6.01    3.34
   3  -6  17    4.52    2.90
   3  -6  18  316.80   17.70
  -3  -6 -18  323.33   18.88
  -3  -6 -19  519.52   24.74
  -3   7  14   65.39    7.08
   3   7 -13   48.21    7.68
   3   7 -12  298.46   18.70
   3   7 -11   30.03    6.03
   3   7 -10  202.57   15.11
   3   7  -9   16.54    4.79
  -3   7   9   14.57    3.76
   3   7  -8  129.29   11.88
  -3   7   8  101.77    9.09
   3   7  -7   13.12    4.29
  -3   7   7   11.09    3.44
   3   7  -6  172.90   13.82
  -3   7   6  166.29   11.81
   3   7  -5   -1.08    2.45
  -3   7   5    6.95    3.31
  -3   7   5    0.83    2.16
   3   7  -4  210.38   15.48
  -3   7   4  235.10   14.33
  -3   7   4  240.43   14.46
  -3   7   3   -0.83    2.02
   3   7  -3    1.09    2.86
  -3   7   3   -1.72    2.75
   3   7  -3    0.75    1.67
   3   7  -2  444.05   23.22
  -3   7   2  441.79   20.28
   3   7  -2  426.62   14.66
  -3   7   2  443.13   21.01
   3   7  -1   76.74    9.30
  -3   7   1   72.99    7.87
   3   7  -1   77.99    4.83
  -3   7   1   58.19    7.47
  -3   7   0   37.47    6.07
  -3   7   0   45.14    6.26
   3   7   0   53.35    3.46
  -3   7  -1   36.44    5.46
   3   7   1   33.03    6.32
   3   7   2   85.09    9.90
  -3   7  -2  101.61    8.71
   3   7   3   93.81   10.22
  -3   7  -3   78.89    7.66
   3   7   4  662.40   29.59
  -3   7  -4  643.31   24.29
  -3   7  -5   40.41    5.49
  -3   7  -6  217.09   12.06
  -3   8   8  313.40   16.78
  -3   8   7   11.32    4.03
  -3   8   6  156.50   11.73
  -3   8   5   21.90    4.76
  -3   8   4  215.38   14.34
  -3   8   3   55.02    7.29
  -3   8   2  183.22   13.33
  -3   8   1   51.41    7.26
  -3   8   0  118.94   10.97
  -3   8  -1    0.98    2.71
  -3   8  -2  225.27   15.64
   4   0 -29    1.07    3.13
   4   0 -28   86.91    9.87
   4   0 -28   78.57    9.25
   4   0 -27    1.28    1.42
   4   0 -27    1.02    2.51
   4   0 -26  117.36   10.89
   4   0 -26  101.41    6.94
   4   0 -25   -0.44    1.34
   4   0 -25   -0.98    2.40
   4   0 -24  613.88   26.36
   4   0 -24  576.10   19.63
   4   0 -23   -1.78    1.60
   4   0 -23    2.79    2.72
   4   0 -22  837.89   26.01
   4   0 -22  889.61   32.77
   4   0 -21    0.46    1.19
   4   0 -21    1.77    1.63
   4   0 -20 1216.55   35.26
   4   0 -20 1384.54   42.81
   4   0 -19    0.46    1.42
   4   0 -19    1.66    1.88
   4   0 -18  383.33   15.00
   4   0 -18  371.30   18.46
   4   0 -17   -0.93    1.36
   4   0 -17    0.78    1.44
   4   0 -16  311.26   13.37
   4   0 -16  342.81   16.77
   4   0 -15   -0.46    1.21
   4   0 -15    2.16    1.76
   4   0 -14 2203.48   56.88
   4   0 -14 2297.37   61.35
   4   0 -13   -0.46    1.03
   4   0 -13    1.32    1.61
   4   0 -12 2330.99   60.38
   4   0 -12 2171.04   56.69
   4   0 -11    0.88    1.16
   4   0 -11   -0.60    1.11
   4   0 -10  329.31   13.54
   4   0 -10  369.99   15.74
   4   0  -9   -0.43    0.88
   4   0  -9    0.54    1.11
   4   0  -8 1072.57   34.10
   4   0  -8 1294.30   33.85
   4   0  -7    2.88    1.32
   4   0  -6 2741.71   66.98
  -4   0   5    0.33    0.69
   4   0  -5    0.40    1.10
  -4   0   4 1836.10   46.76
   4   0  -4 1939.47   48.23
   4   0  -3    0.39    0.71
  -4   0   3    1.59    0.88
  -4   0   2  447.68   14.87
  -4   0   2  444.06   15.63
   4   0  -2  470.47   15.09
  -4   0   1    0.75    0.99
  -4   0   1    1.83    0.94
   4   0  -1    0.28    0.62
   4   0   0 3798.32   86.19
  -4   0   0 3752.18   88.70
  -4   0  -1    0.39    0.87
   4   0   1    0.20    0.57
  -4   0  -2 3314.18   76.97
   4   0   2 3179.46   72.76
  -4   0  -3    1.99    1.16
   4   0   3    0.13    0.38
   4   0   4 1323.42   30.54
  -4   0  -4 1403.62   36.28
   4   0   5   -0.39    0.88
  -4   0  -5    1.65    1.37
   4   0   6  226.04    8.44
  -4   0  -6  222.07   10.43
   4   0   7    1.67    0.82
  -4   0  -7    0.43    0.79
   4   0   8 1654.70   40.31
  -4   0  -8 1626.29   43.64
   4   0   9    4.90    1.31
  -4   0  -9    0.45    1.02
   4   0  10 2707.10   63.21
  -4   0 -10 2632.24   66.71
   4   0  11    0.29    0.70
  -4   0 -11    0.47    1.30
   4   0  12  108.54    5.87
  -4   0 -12   93.98    6.86
  -4   0 -13    0.79    1.21
  -4   0 -13    0.48    1.19
  -4   0 -14   95.87    6.60
  -4   0 -14  108.86    7.39
  -4   0 -15   -0.49    1.28
  -4   0 -15    0.90    1.25
  -4   0 -15    0.29    0.39
  -4   0 -16 1466.59   40.39
  -4   0 -16 1457.19   34.05
  -4   0 -16 1484.12   40.72
  -4   0 -17   -0.49    1.20
  -4   0 -17   -0.51    1.62
  -4   0 -17    0.16    0.48
  -4   0 -18  302.45   13.84
  -4   0 -18  316.74    9.81
  -4   0 -18  323.67   13.79
  -4   0 -19   -0.49    1.28
  -4   0 -19   -0.56    1.47
  -4   0 -19    1.43    0.85
  -4   0 -20  175.32   10.37
  -4   0 -20  169.29    6.92
  -4   0 -20  177.87    9.60
  -4   0 -21   -0.48    1.33
  -4   0 -21    0.62    1.41
  -4   0 -21    0.25    0.91
  -4   0 -22  321.37   15.56
  -4   0 -22  348.35   11.57
  -4   0 -22  332.37   13.96
  -4   0 -23    0.47    1.61
  -4   0 -23    4.06    2.34
  -4   0 -23    0.27    0.88
  -4   0 -24  587.78   23.00
  -4   0 -24  552.09   17.23
  -4   0 -24  622.61   20.20
  -4   0 -25    1.33    1.64
  -4   0 -25   -0.73    1.90
  -4   0 -25    0.30    1.06
  -4   0 -26  513.14   21.69
  -4   0 -27    0.78    2.03
   4   1 -29  154.84   13.36
   4  -1 -29  159.03   13.06
   4   1 -28  113.02   11.29
   4  -1 -28  122.71   11.32
   4  -1 -27   52.28    7.53
   4   1 -27   56.50    8.14
   4  -1 -27   50.64    7.40
   4  -1 -26  226.60   15.92
   4  -1 -26  233.52   15.82
   4  -1 -26  234.67   15.30
   4  -1 -25    9.99    4.03
   4  -1 -25    9.76    4.26
   4   1 -25   14.31    4.23
   4  -1 -25   14.52    4.11
   4  -1 -24  562.93   26.20
   4  -1 -24  585.89   25.91
   4   1 -24  578.24   26.17
   4  -1 -24  590.21   25.59
   4  -1 -23  404.51   21.09
   4  -1 -23  405.44   13.88
   4  -1 -23  406.29   20.70
   4   1 -23  394.30   20.68
   4  -1 -23  401.68   20.27
   4  -1 -22   52.30    6.86
   4  -1 -22   52.13    4.34
   4  -1 -22   43.66    6.62
   4   1 -22   48.50    6.84
   4  -1 -22   57.48    7.17
   4  -1 -21  145.25   11.56
   4  -1 -21  131.88    7.16
   4   1 -21  128.83   10.99
   4  -1 -21  150.02   11.43
   4  -1 -20   19.65    2.87
   4  -1 -20   26.73    5.10
   4  -1 -20   26.35    4.80
   4   1 -20   26.09    5.15
   4  -1 -19  108.56    9.49
   4   1 -19  118.33   10.00
   4  -1 -19  133.34   10.41
   4  -1 -19  128.51    7.13
   4  -1 -18 1219.24   39.72
   4   1 -18 1202.83   39.92
   4  -1 -18 1304.42   40.28
   4  -1 -18 1163.99   32.84
   4  -1 -17  223.10   13.29
   4   1 -17  221.02   13.54
   4  -1 -17  191.86    9.34
   4  -1 -17  208.24   13.00
   4  -1 -16  642.10   24.72
   4  -1 -16  610.52   19.95
   4  -1 -16  641.31   25.10
   4   1 -16  606.70   24.81
   4  -1 -15  277.44   14.55
   4   1 -15  261.32   14.67
   4  -1 -15  279.43   14.95
   4  -1 -15  262.30   11.29
   4  -1 -14  194.16   11.95
   4  -1 -14  213.65    9.98
   4  -1 -13  711.86   25.62
   4  -1 -13  719.74   22.38
   4   1 -13  722.37   26.38
   4  -1 -12 1153.30   32.40
   4   1 -12 1175.89   36.58
   4   1 -11  188.65   11.13
   4  -1 -11  184.19    9.21
   4  -1 -10 1174.37   32.54
   4   1 -10 1151.72   35.37
   4   1  -9  375.37   15.54
   4  -1  -9  314.83   13.01
   4  -1  -8 2849.05   68.65
  -4   1   8 2775.33   67.67
  -4   1   7 1668.92   44.08
   4  -1  -7 1706.49   43.57
  -4  -1   7 1742.86   44.78
  -4   1   7 1656.55   42.70
  -4   1   6  439.06   16.05
   4  -1  -6  449.50   15.95
   4   1  -6  405.08   14.65
  -4  -1   6  445.37   16.23
  -4   1   6  450.70   15.53
   4  -1  -5  820.26   24.43
  -4   1   5  801.22   24.56
   4   1  -5  769.79   22.71
  -4  -1   5  853.31   24.79
  -4   1   5  758.60   23.54
   4  -1  -4  704.46   22.00
  -4   1   4  695.93   21.98
   4   1  -4  691.55   20.04
  -4  -1   4  691.31   21.56
  -4   1   3   11.15    2.21
   4  -1  -3   11.52    2.26
   4   1  -3   11.94    1.75
  -4  -1   3   13.56    2.23
   4   1  -2 3852.75   86.85
  -4   1   2 3887.40   89.78
   4  -1  -2 3854.19   89.79
   4   1  -2 3725.92   88.52
  -4  -1   2 3681.45   88.41
  -4  -1   1    6.57    1.24
  -4  -1   1    9.38    1.75
   4   1  -1    8.37    1.67
  -4  -1   0  398.91   12.17
   4   1   0  414.39   13.33
  -4  -1   0  406.48   13.36
  -4   1   0  420.37   15.37
  -4  -1  -1 1483.27   34.85
   4   1   1 1393.46   35.62
  -4  -1  -1 1443.59   35.93
  -4   1  -1 1442.02   39.23
   4   1   2   22.22    2.18
  -4  -1  -2   25.21    2.39
  -4   1  -3  397.65   15.25
   4   1   3  397.15   11.73
  -4  -1  -3  390.50   11.82
   4   1   3  352.26   13.76
  -4   1  -4 1189.19   34.16
  -4  -1  -4 1247.35   29.26
   4   1   4 1181.33   29.00
   4   1   4 1130.22   32.42
  -4   1  -5   38.98    4.33
   4  -1   5   32.95    1.72
   4   1   5   34.95    3.63
  -4  -1  -5   33.64    2.31
   4   1   5   32.59    3.39
  -4   1  -6 1786.21   47.08
   4   1   6 1667.63   44.75
   4  -1   6 1753.56   38.83
   4  -1   6 1774.86   40.44
  -4  -1  -6 1704.49   40.13
   4   1   6 1663.29   44.16
  -4   1  -7   38.90    4.50
   4   1   7   50.70    4.37
   4  -1   7   47.96    2.70
  -4  -1  -7   43.93    2.40
   4   1   7   43.49    3.94
  -4   1  -8 2185.55   59.62
   4   1   8 2339.58   57.22
   4  -1   8 2238.47   52.65
  -4  -1  -8 2394.97   52.09
   4   1   8 2319.82   57.02
   4   1   9 1870.34   46.16
  -4   1  -9 1767.19   49.01
   4   1   9 1869.68   46.93
  -4  -1  -9 1780.92   41.16
   4  -1   9 1825.22   41.83
   4   1  10  490.89   16.43
  -4   1 -10  497.86   19.12
   4   1  10  467.38   16.91
  -4  -1 -10  494.98   12.46
   4  -1  10  482.64   13.01
  -4   1 -11  242.84   12.39
   4   1  11  255.29   11.17
  -4  -1 -11  232.40    7.00
   4  -1  11  235.81    7.52
  -4   1 -12  356.22   15.79
   4   1  12  372.90   14.34
  -4  -1 -12  333.19    9.72
   4  -1  12  355.20   10.38
  -4  -1 -12  373.12    9.88
  -4   1 -13   14.37    3.14
   4   1  13   10.92    2.35
  -4  -1 -13   12.23    1.34
  -4  -1 -13   10.83    1.23
   4   1  14 2051.40   52.77
  -4   1 -14 1986.75   48.88
  -4  -1 -14 1976.99   54.31
  -4   1 -14 1988.25   54.85
  -4  -1 -14 2057.82   46.63
   4   1  15  579.79   20.90
  -4   1 -15  603.44   18.45
  -4  -1 -15  613.66   22.66
  -4   1 -15  622.22   22.90
  -4  -1 -15  642.91   16.48
  -4   1 -16    0.62    1.29
  -4   1 -16    3.60    1.35
  -4  -1 -16   -0.63    1.74
   4   1  16    0.50    1.32
  -4   1 -16    2.04    0.94
  -4  -1 -16    1.64    0.81
  -4   1 -17   83.63    7.23
  -4   1 -17   84.20    5.59
  -4  -1 -17   70.14    6.83
  -4   1 -17   83.82    4.71
  -4  -1 -17   91.25    4.43
  -4   1 -18   32.82    4.55
  -4  -1 -18   39.32    2.95
  -4   1 -18   35.44    3.14
  -4  -1 -18   33.52    4.88
  -4   1 -18   37.09    3.86
  -4   1 -19  602.49   22.43
  -4  -1 -19  582.18   16.95
  -4   1 -19  590.97   17.76
  -4   1 -19  623.73   19.86
  -4  -1 -19  587.62   23.29
  -4   1 -20  964.48   31.60
  -4  -1 -20 1002.00   26.02
  -4   1 -20  976.66   26.88
  -4   1 -20 1007.69   29.25
  -4  -1 -20  973.27   33.14
  -4   1 -21   66.76    6.61
  -4   1 -21   68.37    4.87
  -4  -1 -21   74.01    4.54
  -4   1 -21   79.36    6.16
  -4  -1 -21   74.53    7.71
  -4   1 -22  177.82   10.54
  -4  -1 -22  142.41    6.92
  -4   1 -22  160.84    7.74
  -4   1 -22  163.83    9.30
  -4  -1 -22  161.22   11.47
  -4   1 -23   21.49    3.89
  -4   1 -23   26.76    3.21
  -4  -1 -23   28.29    2.93
  -4  -1 -23   26.45    4.92
  -4   1 -23   26.97    4.04
  -4   1 -24   38.38    5.13
  -4  -1 -24   53.60    6.92
  -4   1 -24   48.15    5.23
  -4   1 -24   41.80    4.04
  -4  -1 -24   50.61    4.00
  -4   1 -25  130.94    8.98
  -4  -1 -25  131.31   10.99
  -4   1 -25  146.13    7.56
  -4  -1 -25  144.48    7.10
  -4   1 -25  131.31    9.04
  -4   1 -26   73.70    6.76
  -4  -1 -26   82.81    8.68
  -4   1 -26   73.35    6.77
  -4  -1 -27   33.28    6.02
  -4  -1 -28  169.04   12.96
   4   2 -28  132.40   12.68
   4  -2 -28  171.68   13.41
   4   2 -27  218.64   15.80
   4  -2 -27  218.69   15.23
   4  -2 -26   15.35    5.02
   4   2 -26   19.78    5.10
   4  -2 -26   26.16    5.59
   4  -2 -25 1111.01   41.36
   4  -2 -25 1089.40   40.27
   4   2 -25 1111.56   40.87
   4  -2 -25 1127.91   39.70
   4  -2 -24   13.23    4.45
   4  -2 -24   13.43    4.06
   4   2 -24   11.66    4.17
   4  -2 -24   20.43    4.77
   4  -2 -23   82.99    9.50
   4  -2 -23   72.41    8.75
   4   2 -23   82.93    9.36
   4  -2 -23   97.37    9.55
   4  -2 -22   39.96    6.63
   4  -2 -22   50.70    7.27
   4   2 -22   49.65    7.07
   4  -2 -22   39.59    6.23
   4  -2 -21    4.93    3.16
   4  -2 -21    0.95    1.95
   4   2 -21    2.97    2.24
   4  -2 -21    3.69    2.95
   4  -2 -20  149.78   11.80
   4  -2 -20  131.48   11.27
   4   2 -20  130.51   11.20
  -4  -2  20  144.22   11.18
   4  -2 -19  926.25   34.21
   4  -2 -19 1016.63   35.03
   4   2 -19  934.29   34.76
  -4  -2  19  895.80   33.03
   4  -2 -18    0.85    1.58
   4  -2 -18   -0.88    1.99
  -4  -2  18   -0.81    1.97
   4   2 -18    0.92    2.39
   4  -2 -17  813.64   30.23
   4  -2 -17  805.32   29.97
   4   2 -17  802.26   30.59
  -4  -2  17  776.51   28.94
   4  -2 -16  168.57   11.69
   4   2 -16  165.06   11.93
   4  -2 -16  155.73   11.32
   4  -2 -15  546.02   23.04
   4   2 -15  575.83   23.95
   4  -2 -14  204.39   12.60
   4   2 -14  220.03   13.44
   4  -2 -13  317.83   16.02
   4   2 -13  336.93   16.76
   4  -2 -12   12.28    3.22
  -4   2  12   11.40    2.07
   4   2 -12   13.10    3.23
  -4  -2  12    7.66    2.37
   4  -2 -11 2115.53   58.69
   4   2 -11 2177.70   59.51
  -4   2  11 2190.25   53.96
  -4  -2  11 2177.69   58.21
   4  -2 -10   78.64    7.07
   4   2 -10   95.90    7.83
  -4   2  10   93.42    5.96
   4  -2  -9 1741.78   48.45
   4   2  -9 1681.86   48.37
  -4   2   9 1739.35   44.80
  -4   2   8  441.83   15.90
  -4   2   7  646.63   21.03
  -4  -2   7  665.41   22.59
   4  -2  -6  431.80   16.32
  -4  -2   6  430.76   16.76
  -4   2   6  452.35   16.24
   4  -2  -5  265.25   11.78
  -4   2   5  301.55   12.67
  -4  -2   5  304.22   12.98
  -4   2   4  141.35    8.35
  -4  -2   4  148.17    8.42
   4  -2  -4  140.64    7.60
  -4   2   3 3247.68   85.32
   4   2  -3 3660.16   80.22
  -4   2   3 3354.12   85.05
  -4  -2   3 3526.67   84.97
   4   2  -3 3610.36   84.79
   4  -2  -3 3598.43   82.92
   4   2  -2   86.01    4.12
   4   2  -2   87.99    6.16
  -4  -2   2   87.05    6.00
   4  -2  -2   69.83    4.71
   4   2  -1 2297.91   52.46
   4  -2  -1 2351.67   54.77
   4   2  -1 2315.81   57.33
  -4  -2   1 2186.96   57.20
   4  -2   0  101.76    5.05
  -4  -2   0  110.02    6.61
   4   2   0  106.72    6.48
   4  -2   1  114.36    4.98
  -4  -2  -1  112.00    6.52
   4   2   1  100.74    6.36
   4  -2   2 1419.98   33.55
   4   2   2 1439.14   37.03
  -4  -2  -2 1376.20   36.85
   4  -2   3  470.35   12.25
   4   2   3  471.49   15.48
  -4  -2  -3  458.61   15.46
  -4  -2  -4    2.26    1.15
  -4  -2  -5 1447.00   37.91
   4  -2   5 1519.92   38.29
   4   2   6  170.80    9.58
  -4  -2  -6  159.49    7.54
   4  -2   6  151.21    7.51
   4   2   6  177.90    8.71
   4   2   7 2632.93   66.90
  -4  -2  -7 2654.42   62.43
   4  -2   7 2569.98   62.93
   4   2   7 2699.82   64.19
   4   2   8  215.63   11.12
   4  -2   8  203.04    8.64
  -4  -2  -8  198.48    8.46
   4   2   8  203.93    9.44
   4   2   9    6.61    1.70
   4   2   9    3.77    1.65
   4  -2   9    5.99    1.49
  -4  -2  -9    4.32    1.20
   4   2  10  194.63   10.65
   4  -2  10  194.34    8.43
  -4  -2 -10  193.33    8.23
   4   2  10  180.22    8.74
   4   2  11 1012.83   31.25
   4  -2  11  990.79   27.16
  -4  -2 -11  996.62   26.95
   4   2  11 1004.44   27.79
   4   2  12    4.74    1.44
   4   2  12    3.45    1.76
  -4  -2 -12    2.92    1.33
   4  -2  12    4.88    1.44
   4   2  13 1364.38   34.83
   4   2  13 1289.21   38.72
   4  -2  13 1314.75   34.46
  -4  -2 -13 1317.32   34.17
   4   2  14  212.73   11.53
  -4  -2 -14  189.27    8.42
   4  -2  14  197.42    8.65
   4   2  15 1145.06   35.76
   4  -2  15 1194.68   31.51
   4   2  16   54.68    6.03
   4  -2  16   47.26    4.05
   4   2  17   20.81    3.73
  -4  -2 -17   20.19    4.30
  -4   2 -17   17.98    1.92
   4  -2  17   17.60    2.68
   4   2  18  192.47   11.62
  -4   2 -18  178.36    7.22
  -4  -2 -18  185.52   12.63
   4  -2  18  205.75    9.07
  -4   2 -19  281.82   10.14
  -4  -2 -19  276.38   16.07
  -4  -2 -19  283.56   11.23
   4  -2  19  309.58   11.81
  -4   2 -20    0.57    1.03
  -4  -2 -20   -0.89    2.33
  -4  -2 -20    1.03    1.30
  -4   2 -21  903.25   25.02
  -4  -2 -21  936.51   33.90
  -4  -2 -21  878.05   25.61
  -4   2 -22   64.89    4.85
  -4  -2 -22   75.06    8.41
  -4  -2 -22   70.30    5.11
  -4   2 -23  123.07    7.05
  -4  -2 -23  130.12   11.31
  -4  -2 -23  119.85    6.85
  -4  -2 -24   38.09    6.34
  -4   2 -24   39.62    4.10
  -4   2 -24   33.88    5.43
  -4  -2 -24   40.04    3.99
  -4  -2 -25    3.08    2.33
  -4   2 -25    0.77    1.74
  -4  -2 -26   46.19    7.38
  -4   2 -26   42.70    5.97
  -4  -2 -27  329.23   19.38
  -4   2 -27  335.89   16.89
  -4  -2 -28   48.14    7.77
   4   3 -26   93.60   10.68
   4  -3 -26   80.98    9.67
   4  -3 -25   -1.19    2.20
   4   3 -25    2.36    2.89
   4  -3 -25   -1.08    2.22
   4  -3 -24   31.14    6.34
   4  -3 -24   22.64    5.47
   4   3 -24   30.23    6.11
  -4  -3  24   36.73    6.35
   4  -3 -23  873.25   34.74
   4  -3 -23  876.74   34.90
   4   3 -23  791.86   33.90
  -4  -3  23  844.16   33.10
   4  -3 -22   34.44    6.41
   4  -3 -22   30.17    6.02
   4   3 -22   42.66    7.08
  -4  -3  22   39.19    6.41
   4  -3 -21  570.32   26.12
   4  -3 -21  544.81   26.06
   4   3 -21  598.85   27.35
  -4  -3  21  554.60   24.87
   4  -3 -20   79.19    9.02
   4   3 -20   89.84    9.81
  -4  -3  20   83.52    8.81
   4  -3 -19  600.96   26.79
   4   3 -19  675.40   28.93
  -4  -3  19  655.74   26.75
   4  -3 -18  390.18   19.64
   4   3 -18  357.00   19.66
  -4  -3  18  322.91   17.45
   4  -3 -17  418.53   20.41
   4   3 -17  423.30   21.38
  -4  -3  17  387.82   19.09
   4  -3 -16   22.38    4.86
   4   3 -16   21.09    4.63
   4  -3 -15  121.41   10.13
   4   3 -15  147.55   11.55
  -4   3  15  135.10    7.15
   4  -3 -14   15.18    3.99
  -4   3  14   20.22    2.88
   4  -3 -14   16.62    4.08
   4   3 -14   16.16    4.16
   4  -3 -13 2799.67   77.44
   4  -3 -13 2997.33   78.50
   4   3 -13 2994.37   79.98
  -4   3  13 2971.57   71.29
   4  -3 -12  115.61    9.31
   4   3 -12  102.48    9.22
  -4  -3  12   94.89    8.24
  -4   3  12  103.16    6.73
   4  -3 -11   36.87    5.21
   4   3 -11   33.55    5.17
  -4   3  11   41.39    4.31
  -4  -3  11   27.06    4.55
  -4   3  10  184.70   11.02
   4  -3 -10  191.44   11.59
  -4   3  10  212.10   10.25
  -4  -3  10  201.84   11.84
  -4   3   9   98.73    6.85
  -4   3   9   81.25    7.07
   4  -3  -9   96.35    7.72
   4   3  -9   81.28    7.65
  -4  -3   9   77.83    7.17
  -4   3   8   67.47    5.78
  -4   3   8   67.09    6.36
  -4  -3   8   69.42    6.66
   4  -3  -8   62.12    6.13
  -4   3   7 4131.90  100.00
  -4   3   7 4198.96  101.16
   4  -3  -7 4113.58  100.43
  -4  -3   7 4218.01  101.52
  -4   3   6   17.14    3.26
  -4   3   6   18.63    3.40
  -4  -3   6   13.91    3.18
  -4   3   5  948.19   30.66
  -4  -3   5  961.39   30.69
  -4  -3   4  505.76   19.76
   4  -3  -4  522.24   18.27
  -4  -3   3  548.08   20.75
   4   3  -3  585.80   21.30
   4  -3  -3  564.17   18.88
  -4  -3   2   58.63    5.60
   4   3  -2   67.12    6.06
   4  -3  -2   71.26    5.11
   4   3  -1 1556.66   36.03
   4   3  -1 1605.95   44.14
  -4  -3   1 1630.47   44.08
   4  -3  -1 1656.23   41.00
   4   3   0  149.71    9.11
   4  -3   0  163.52    7.71
  -4  -3  -1  587.54   20.80
   4   3   1  572.66   20.46
   4  -3   1  597.68   17.78
  -4  -3  -2   56.69    5.33
   4  -3   2   60.90    4.00
  -4  -3  -3 3060.07   75.49
  -4  -3  -4  323.94   13.84
  -4  -3  -5   96.49    6.74
  -4  -3  -6   97.35    6.80
  -4  -3  -7  307.58   13.14
  -4  -3  -8  250.01   11.60
  -4  -3  -9 2667.21   60.42
   4   3   9 2684.28   70.44
  -4  -3  -9 2695.72   66.70
  -4  -3 -10   41.66    2.85
   4   3  10   38.65    5.26
  -4  -3 -10   41.93    4.48
   4   3  10   49.12    4.46
  -4  -3 -11  603.21   17.19
   4   3  11  619.45   23.80
  -4  -3 -11  636.06   21.16
   4   3  11  607.70   19.72
  -4  -3 -12   74.48    6.01
   4   3  12   85.61    5.78
   4   3  13   67.92    6.94
  -4  -3 -13   61.18    5.38
   4   3  13   59.92    4.62
   4   3  14   48.33    6.07
  -4  -3 -14   52.73    5.03
   4   3  14   46.65    3.99
   4   3  15 1416.73   35.69
  -4  -3 -15 1361.17   38.29
   4   3  15 1336.89   42.34
   4   3  16   15.42    2.21
   4   3  16   20.50    4.39
  -4  -3 -16   16.18    2.94
   4   3  17  557.18   23.46
  -4  -3 -17  556.09   19.89
   4  -3  17  619.56   20.55
   4   3  18    2.38    2.32
  -4  -3 -18    0.49    1.42
   4  -3  18    0.48    1.53
   4   3  19  240.99   14.45
  -4  -3 -19  239.77   11.56
   4  -3  19  242.26   11.56
   4   3  20  233.56   14.06
   4  -3  20  210.29   10.75
   4  -3  21  102.53    7.29
   4  -3  22   26.06    3.80
  -4  -3 -23  205.41   10.58
   4  -3  23  195.97   10.57
   4  -4 -24  133.66   12.93
   4  -4 -23    6.88    3.83
   4   4 -23   13.80    4.92
   4  -4 -22  245.37   16.83
   4   4 -22  268.68   18.44
  -4  -4  22  249.01   16.33
   4  -4 -21   -1.07    2.43
   4   4 -21   -1.21    3.35
  -4  -4  21    0.99    2.43
   4  -4 -20  164.46   13.07
   4   4 -20  172.66   14.23
  -4  -4  20  181.65   13.32
   4  -4 -19  213.76   15.59
   4   4 -19  199.45   15.33
  -4  -4  19  219.67   14.65
   4  -4 -18    1.09    2.46
   4   4 -18    4.50    2.75
  -4  -4  18    3.74    2.59
   4  -4 -17  497.95   23.97
   4   4 -17  443.23   23.35
  -4   4  17  463.19   15.70
  -4  -4  17  488.86   22.45
   4  -4 -16  324.66   18.41
   4   4 -16  283.97   17.79
  -4   4  16  301.21   12.16
   4  -4 -15  109.66   10.40
   4   4 -15  125.84   11.35
  -4   4  15  116.21    7.17
   4  -4 -14 1055.47   37.26
   4   4 -14  994.71   37.71
  -4   4  14 1080.46   30.85
   4  -4 -13  106.88    9.67
   4   4 -13  104.86    9.97
  -4   4  13   89.52    6.69
   4  -4 -12  728.03   28.27
   4   4 -12  731.15   29.74
  -4  -4  12  674.13   27.56
  -4   4  12  768.34   24.56
  -4   4  11   13.62    3.58
  -4   4  11   17.35    3.26
   4  -4 -11   20.61    4.22
   4   4 -11   20.31    4.68
  -4  -4  11   11.37    3.45
  -4   4  10   82.72    6.98
  -4   4  10   87.17    7.71
  -4  -4  10  103.18    8.90
   4   4 -10  109.10    9.66
   4  -4 -10   90.47    8.19
  -4   4   9  642.27   22.70
  -4   4   9  606.09   23.30
   4   4  -9  565.94   24.90
  -4  -4   9  634.47   25.03
   4  -4  -9  581.19   23.59
  -4   4   8  725.38   26.78
   4  -4  -8  784.99   27.27
  -4  -4   8  760.54   28.03
   4  -4  -7   33.82    4.70
  -4   4   7   39.75    5.24
  -4  -4   7   33.42    5.05
  -4   4   6  900.37   30.44
  -4  -4   6  905.26   31.14
   4  -4  -6  884.89   29.24
  -4   4   5   60.79    6.35
  -4  -4   5   46.99    5.95
   4  -4  -5   47.75    5.24
  -4   4   4  354.27   16.51
  -4  -4   4  341.57   16.63
   4   4  -4  327.92   16.36
   4  -4  -4  315.99   14.42
  -4   4   3  469.06   19.92
   4   4  -3  484.88   20.46
  -4  -4   3  465.38   19.85
  -4  -4   2   16.22    3.60
   4   4  -2   12.44    3.14
   4   4  -1  337.66   16.23
  -4  -4   1  365.35   16.65
   4  -4   0  889.74   26.59
  -4  -4   0  876.52   29.74
   4   4   1   40.68    5.80
  -4  -4  -1   40.28    5.20
   4   4   2 1549.09   47.65
  -4  -4  -2 1603.62   45.68
   4   4   3  291.99   15.52
  -4  -4  -3  249.39   13.23
   4  -4   3  254.17   13.33
   4   4   4  156.75   11.33
  -4  -4  -4  171.65   10.69
   4  -4   4  189.13   11.00
   4   4   5  739.88   27.84
  -4  -4  -5  686.57   25.21
   4  -4   5  756.57   25.89
   4   4   6   65.65    7.16
  -4  -4  -6   61.01    6.16
   4  -4   6   70.03    6.61
   4  -4   7  168.42   10.41
  -4  -4  -7  165.23   10.40
  -4  -4  -8  813.55   27.48
   4  -4   8  780.74   26.91
  -4  -4  -9    1.87    1.91
   4  -4   9    1.21    1.58
   4  -4  10  871.07   28.75
  -4  -4 -10  879.38   29.30
   4  -4  11  186.65   10.84
  -4  -4 -11  173.99   10.76
   4   4  12  322.31   17.20
   4  -4  12  322.70   15.04
  -4  -4 -12  345.94   15.77
   4   4  13  235.22   14.59
  -4  -4 -13  230.88   12.69
   4  -4  13  253.54   12.85
  -4  -4 -14  228.19    8.86
   4   4  14  203.55   13.69
   4  -4  14  221.58   12.01
  -4  -4 -14  219.49   12.22
   4   4  14  221.96   10.11
  -4  -4 -15  103.00    5.91
   4   4  15   99.95    9.29
  -4  -4 -15  106.16    8.25
   4  -4  15  102.86    7.97
   4   4  15  100.22    6.27
  -4  -4 -16  601.27   19.34
   4   4  16  660.17   26.78
  -4  -4 -16  601.26   22.99
   4  -4  16  651.74   23.24
   4   4  16  622.16   18.78
  -4  -4 -17    2.03    1.50
   4   4  17    5.07    1.60
   4   4  17    8.15    3.24
  -4  -4 -17    5.76    2.44
   4  -4  17    5.47    2.18
  -4  -4 -18  283.29   12.31
   4   4  18  270.07   16.32
   4  -4  18  288.70   14.14
  -4  -4 -18  284.41   14.20
  -4  -4 -19  163.36    9.25
   4   4  19  161.59   12.25
  -4  -4 -19  141.90    9.86
   4  -4  19  168.23   10.31
  -4  -4 -20  147.79    9.10
   4   4  20  149.15   11.92
  -4  -4 -20  145.63    9.89
   4  -4  20  135.73    9.37
  -4  -4 -21  192.40   10.95
   4   4  21  212.89   14.52
  -4  -4 -21  210.73   12.09
   4  -4  21  207.70   11.68
   4  -4  22   46.74    5.52
   4  -4  23   42.91    5.41
   4  -4  24  152.96   10.07
  -4   5  19   -0.32    1.25
   4   5 -19   -1.29    2.67
   4  -5 -18  784.42   33.94
   4   5 -18  808.40   34.96
  -4  -5  18  835.86   32.96
  -4   5  18  796.42   23.91
  -4   5  17    7.37    2.13
   4  -5 -17   11.40    4.08
   4   5 -17    6.21    3.98
  -4  -5  17   10.16    3.76
   4  -5 -16  118.33   11.42
   4   5 -16  134.60   12.64
  -4   5  16   95.79    6.93
  -4   5  15    6.18    2.33
   4   5 -15    4.74    3.10
   4  -5 -15    8.40    3.50
  -4   5  14   37.43    4.66
   4   5 -14   27.76    5.98
   4  -5 -14   18.13    4.87
  -4   5  13    2.96    2.04
   4   5 -13    4.51    2.95
   4  -5 -13    2.90    2.96
  -4   5  12  929.93   29.67
   4  -5 -12  837.73   32.56
  -4  -5  12  862.40   33.06
   4   5 -12  884.36   35.20
  -4   5  11   13.71    3.62
  -4   5  11    5.18    2.47
   4  -5 -11    8.02    3.08
   4   5 -11    4.25    2.95
  -4  -5  11   10.20    3.54
  -4   5  10  445.64   19.89
   4  -5 -10  443.71   20.95
  -4  -5  10  468.02   21.85
   4   5 -10  441.52   22.34
   4  -5  -9    7.38    2.84
  -4   5   9   11.97    3.25
  -4  -5   9    7.18    3.22
  -4   5   8 1220.90   38.64
   4  -5  -8 1135.40   38.16
  -4  -5   8 1211.13   40.29
   4  -5  -7   16.53    3.68
  -4   5   7   10.68    3.46
  -4  -5   7   12.18    3.69
  -4   5   6  133.17   10.09
  -4  -5   6  106.08    9.70
   4  -5  -6  138.79   10.03
  -4   5   5   69.89    7.48
  -4  -5   5   72.46    7.87
   4  -5  -5   55.20    6.44
  -4   5   4  414.27   19.11
  -4  -5   4  363.65   18.63
   4  -5  -4  390.41   17.53
  -4   5   3   26.16    4.90
  -4  -5   3   31.38    5.26
   4  -5  -3   27.03    4.29
  -4  -5   2 1763.63   52.40
   4   5  -1   39.76    2.05
   4   5  -1   39.41    6.22
  -4  -5   1   45.61    6.17
   4   5   0   21.96    4.79
  -4  -5   0   17.80    4.04
   4  -5   0   11.35    3.28
   4   5   1   21.96    4.87
  -4  -5  -1   20.83    4.27
   4  -5   1   15.30    3.74
   4   5   2   53.09    7.00
  -4  -5  -2   46.90    6.14
   4  -5   2   46.19    6.16
   4   5   3   15.54    4.14
  -4  -5  -3    5.55    2.55
   4  -5   3   10.28    3.11
   4   5   4 1309.50   43.27
  -4  -5  -4 1273.97   41.09
   4  -5   4 1311.56   41.51
   4   5   5   71.64    8.25
  -4   5  -5   75.96    5.38
  -4  -5  -5   58.08    7.08
   4  -5   5   73.15    7.49
   4   5   6  780.04   30.15
  -4   5  -6  717.01   21.68
  -4  -5  -6  817.93   28.89
   4  -5   6  704.34   27.46
   4   5   7    6.56    3.24
  -4  -5  -7    3.91    2.40
   4  -5   7    8.44    3.09
   4   5   8  255.99   15.62
  -4  -5  -8  227.79   13.76
   4  -5   8  250.41   14.13
   4   5   9    2.87    2.50
  -4  -5  -9    0.79    2.06
   4  -5   9   -0.76    1.97
   4  -5  10  381.46   18.09
  -4  -5 -10  371.58   18.18
   4  -5  11   31.56    5.00
  -4  -5 -11   31.65    5.37
   4  -5  12  255.74   14.36
  -4  -5 -12  244.25   14.42
   4  -5  13   26.13    4.52
  -4  -5 -13   34.28    5.45
  -4  -5 -14 1091.64   36.20
   4  -5  14 1099.41   35.50
   4   5  14 1036.54   30.96
   4   5  15   24.17    5.21
   4  -5  15   27.33    4.67
  -4  -5 -15   29.67    5.00
   4   5  16   16.26    4.61
  -4  -5 -16   15.27    3.87
   4  -5  16   17.00    4.00
   4   5  17   -0.34    1.08
   4   5  17   -1.03    2.53
  -4  -5 -17   -0.81    2.23
   4  -5  17   -0.74    1.81
   4   5  18   37.75    6.47
  -4  -5 -18   41.02    5.90
   4   5  18   35.24    3.14
   4  -5  18   33.24    5.17
  -4  -5 -19    1.61    2.23
   4  -5  19    3.71    2.17
  -4  -5 -20  491.79   22.06
   4  -5  20  541.05   22.05
   4  -5  21   64.75    7.10
   4  -5  22   51.47    6.40
  -4   6  18   -0.46    1.75
  -4   6  17   97.44    7.32
  -4   6  16   27.08    4.18
  -4   6  15   17.91    3.54
  -4   6  14  464.39   19.37
   4  -6 -14  476.33   24.14
  -4   6  13   32.68    4.98
   4   6 -13   36.00    6.82
   4  -6 -13   29.93    5.88
  -4   6  12   17.49    3.83
   4   6 -12   10.95    3.91
   4  -6 -12   23.78    5.33
  -4   6  11  211.29   13.37
   4  -6 -11  203.10   14.46
  -4  -6  11  207.70   14.97
   4   6 -11  215.37   15.96
  -4   6  10    8.02    3.32
   4  -6 -10   13.57    4.11
   4   6 -10   11.60    4.15
  -4  -6  10    5.19    3.04
  -4   6   9  146.24   11.13
  -4  -6   9  160.00   12.85
   4  -6  -9  152.13   12.03
  -4   6   8  459.42   20.88
  -4  -6   8  487.35   23.30
   4  -6  -8  407.79   20.81
  -4   6   7   17.47    4.22
  -4  -6   7   16.05    4.92
   4  -6  -7   12.32    3.74
  -4   6   6  380.70   19.09
  -4  -6   6  435.31   21.59
  -4   6   5  222.88   14.15
  -4  -6   5  233.89   15.22
   4   6  -5  210.19   15.18
  -4   6   4  209.67   13.56
  -4  -6   4  175.95   13.46
   4   6  -4  192.59   14.39
  -4   6   3  405.02   19.90
   4  -6  -3  352.82   19.74
  -4  -6   3  387.14   20.28
   4   6  -3  419.18   21.67
   4   6  -2    6.44    1.30
  -4   6   2    2.68    2.74
  -4  -6   2    6.79    3.23
   4  -6  -2    0.98    2.23
   4   6  -2    7.28    3.47
   4  -6  -1   49.70    7.26
  -4  -6   1   66.87    8.21
   4   6  -1   62.31    8.07
  -4  -6   0  341.57   18.78
   4  -6   0  337.02   18.79
   4   6   0  343.25   19.41
   4  -6   1   47.09    7.18
  -4  -6  -1   57.83    7.52
   4   6   1   39.44    6.65
  -4  -6  -2  187.69   13.43
   4  -6   2  177.55   13.26
   4   6   2  179.79   13.84
   4  -6   3   54.58    7.31
  -4  -6  -3   40.08    6.37
   4   6   3   44.09    6.93
  -4  -6  -4   82.09    8.99
   4  -6   4  101.36    9.82
   4   6   4   84.09    9.61
  -4   6  -4   92.07    6.98
  -4  -6  -5  158.88   12.53
   4  -6   5  155.93   12.19
   4   6   5  140.40   12.24
  -4   6  -5  157.65    9.00
  -4  -6  -6  131.74   11.26
   4  -6   6  124.74   10.93
   4   6   6  133.39   12.03
  -4   6  -6  132.78    7.91
  -4  -6  -7  165.56   12.59
   4  -6   7  170.68   12.61
   4   6   7  178.97   13.78
  -4   6  -7  166.76    8.71
  -4  -6  -8  185.38   13.60
   4  -6   8  197.73   13.75
   4   6   8  207.13   15.21
   4  -6   9   66.87    7.98
  -4  -6  -9   52.71    7.18
   4   6   9   63.92    8.47
   4  -6  10  431.56   21.10
  -4  -6 -10  426.64   21.29
   4   6  10  442.77   23.02
   4  -6  11   71.95    8.28
  -4  -6 -11   75.90    8.63
   4   6  11   64.93    8.76
  -4  -6 -12   58.88    7.84
   4  -6  12   54.67    7.27
   4  -6  13  170.67   12.60
  -4  -6 -13  173.59   13.17
  -4  -6 -14   36.02    6.12
   4  -6  14   39.61    6.35
   4   6  15   42.71    4.93
  -4  -6 -15   48.35    7.03
   4  -6  15   55.04    7.24
   4  -6  16  272.87   16.17
  -4  -6 -16  292.90   17.08
  -4  -6 -17   -0.95    2.62
   4  -6  17   -0.87    1.97
   4  -6  18   28.58    5.16
  -4   7  14    9.68    3.08
  -4   7  13  131.18   10.50
  -4   7  12   47.70    6.44
   4   7 -11   53.77    8.41
   4   7 -10    5.95    3.81
  -4   7  10    6.72    3.30
   4   7  -9   23.64    5.69
  -4   7   9   13.66    4.11
   4   7  -8   66.96    8.86
  -4   7   8   62.28    7.50
   4   7  -7  474.93   24.79
  -4   7   7  477.18   22.20
   4   7  -6   34.82    6.75
  -4   7   6   47.60    6.95
   4   7  -5   91.42   10.45
  -4   7   5  119.51   10.47
   4   7  -4    1.15    3.01
   4   7  -4    1.89    1.29
  -4   7   4    3.70    2.84
  -4   7   3   45.48    6.96
   4   7  -3   44.13    3.08
   4   7  -2  149.64   13.05
  -4   7   2  156.64   12.56
   4   7  -1  178.23   14.50
  -4   7   1  191.46   13.97
  -4   7   0   -1.00    2.44
   4   7   0   -2.31    3.70
   5   0 -28   -1.11    2.30
   5   0 -27  316.57   19.08
   5   0 -26    1.14    2.57
   5   0 -26    0.52    1.51
   5   0 -26    1.07    2.62
   5   0 -25  378.07   20.76
   5   0 -25  371.36   20.29
   5   0 -25  332.67   14.57
   5   0 -24   -1.06    2.60
   5   0 -24    0.53    1.61
   5   0 -24   -2.05    3.41
   5   0 -23  244.04   16.10
   5   0 -23  241.95   11.99
   5   0 -23  231.26   15.45
   5   0 -22    0.53    1.40
   5   0 -22   -0.98    2.22
   5   0 -21   31.27    4.26
   5   0 -21   39.04    6.14
   5   0 -20   -1.09    1.51
   5   0 -20   -0.93    2.10
   5   0 -19  274.88   16.19
   5   0 -19  265.44   12.84
   5   0 -18    0.55    1.44
   5   0 -18    0.87    1.97
   5   0 -17  809.39   26.89
   5   0 -17  871.96   31.41
   5   0 -16    1.67    1.46
   5   0 -16   -0.82    1.69
   5   0 -15  236.14   11.86
   5   0 -15  197.93   12.84
   5   0 -14    1.67    1.36
   5   0 -14   -0.76    1.40
   5   0 -13   79.34    6.58
   5   0 -13   69.52    7.11
   5   0 -12    3.27    1.67
   5   0 -12   -0.69    1.43
   5   0 -11 2771.29   74.31
   5   0 -11 2973.88   72.81
   5   0 -10    1.06    1.30
   5   0  -9  799.04   25.97
   5   0  -8    0.51    1.06
   5   0  -7 1748.76   47.31
  -5   0   6    0.82    0.85
   5   0  -6   -0.47    0.75
   5   0  -6   -0.50    1.04
  -5   0   5   11.23    2.08
   5   0  -5   11.12    2.23
   5   0  -5    9.40    2.26
  -5   0   4   -0.39    0.89
   5   0  -4   -0.49    1.01
   5   0  -4    0.44    0.91
  -5   0   3  800.61   24.27
   5   0  -3  819.44   24.67
  -5   0   2    0.38    1.00
  -5   0   2    0.47    1.06
   5   0  -2    1.10    1.07
  -5   0   1 2627.25   64.79
   5   0  -1 2653.37   63.79
  -5   0   1 2677.44   66.57
  -5   0   0    4.76    1.70
   5   0   0    2.06    1.06
  -5   0  -1   14.44    2.72
   5   0   1   15.25    1.97
  -5   0  -2    4.87    1.62
   5   0   2    0.22    0.50
  -5   0  -3 1115.84   32.52
   5   0   3 1091.22   27.21
  -5   0  -4    0.50    0.93
   5   0   4    1.40    0.56
   5   0   5 1374.36   37.88
   5   0   5 1340.68   30.88
  -5   0  -5 1345.40   38.16
   5   0   6    0.57    0.70
  -5   0  -6    0.52    1.27
   5   0   7  934.63   25.34
  -5   0  -7  942.51   29.28
   5   0   8    0.28    0.69
  -5   0  -8    0.54    1.22
   5   0   9  215.64    8.77
  -5   0  -9  210.36   11.20
   5   0  10   -0.29    0.90
  -5   0 -10    0.56    1.16
   5   0  11 2048.20   50.12
  -5   0 -11 2058.17   54.98
   5   0  12   -0.32    1.09
  -5   0 -12    0.58    1.51
   5   0  13  404.02   13.92
  -5   0 -13  394.57   16.87
  -5   0 -14   -0.59    1.21
  -5   0 -15 1859.42   50.81
  -5   0 -16    0.58    1.62
  -5   0 -17   47.17    5.20
  -5   0 -18   -0.58    1.51
  -5   0 -19  101.16    7.66
  -5   0 -20   -0.57    1.49
  -5   0 -21 1623.33   45.14
  -5   0 -22   -0.55    1.53
  -5   0 -23   43.07    5.00
  -5   0 -24    0.54    1.40
  -5   0 -25   14.80    3.22
   5  -1 -28   26.24    5.65
   5   1 -28   24.27    5.87
   5   1 -27   14.05    3.40
   5  -1 -27    8.61    3.73
   5   1 -27   14.76    4.82
   5  -1 -26   17.11    4.95
   5  -1 -26   14.21    4.91
   5   1 -26   13.68    3.17
   5  -1 -26   20.03    4.88
   5   1 -26   20.07    5.26
   5  -1 -25   34.27    6.42
   5  -1 -25   36.29    4.03
   5  -1 -25   29.82    6.40
   5   1 -25   32.77    6.27
   5  -1 -25   41.32    6.99
   5  -1 -24  410.14   22.15
   5  -1 -24  424.68   15.78
   5   1 -24  445.20   22.76
   5  -1 -24  407.75   21.39
   5  -1 -23  396.97   15.45
   5  -1 -23  401.03   21.48
   5   1 -23  417.47   21.73
   5  -1 -23  425.51   21.46
   5  -1 -22   24.62    5.30
   5  -1 -22   20.72    3.33
   5  -1 -22   16.32    4.46
   5   1 -22   23.54    5.11
   5  -1 -21  210.21   14.57
   5  -1 -21  224.96   10.93
   5   1 -21  250.02   15.93
   5  -1 -21  237.53   15.08
   5  -1 -20    6.22    1.98
   5  -1 -20   10.44    3.62
   5  -1 -20    7.33    3.06
   5   1 -20    9.66    3.57
   5  -1 -19  723.47   28.58
   5  -1 -19  671.10   27.73
   5   1 -19  736.38   29.13
   5  -1 -19  673.25   22.73
   5  -1 -18  717.04   28.09
   5  -1 -18  704.01   27.76
   5  -1 -18  651.32   22.42
   5   1 -18  703.75   28.22
   5  -1 -17  227.72   14.17
   5  -1 -17  246.56   14.74
   5   1 -17  246.09   14.94
   5  -1 -17  218.30   11.01
   5  -1 -16  233.04   14.16
   5  -1 -16  296.46   15.81
   5  -1 -16  220.57   11.34
   5   1 -16  272.21   15.53
   5  -1 -15  666.30   26.30
   5  -1 -15  642.34   22.47
   5   1 -15  685.01   26.90
   5  -1 -14  308.78   16.02
   5   1 -14  325.47   16.85
   5  -1 -14  320.97   13.90
   5  -1 -14  325.54   16.66
   5  -1 -13 1546.80   46.08
   5   1 -13 1577.33   46.98
   5  -1 -13 1508.78   42.41
   5  -1 -13 1569.28   46.72
   5   1 -12  372.04   16.01
   5  -1 -12  366.12   17.07
   5   1 -12  354.98   17.24
   5  -1 -12  348.21   14.88
   5  -1 -11   81.43    7.33
   5   1 -11   66.76    6.01
   5  -1 -11   68.60    5.88
   5   1 -11   61.03    6.55
  -5  -1  11   71.50    6.78
  -5  -1  10  142.95    9.65
   5  -1 -10  134.24    8.43
  -5  -1   9   88.41    7.20
   5  -1  -9   70.07    5.95
  -5   1   8   47.73    5.03
   5   1  -8   53.67    4.84
   5  -1  -8   50.06    4.98
  -5   1   8   54.06    4.89
  -5  -1   8   48.65    5.24
   5  -1  -7 2368.23   60.82
   5   1  -7 2359.36   59.33
  -5   1   7 2474.21   60.65
  -5  -1   7 2303.56   61.25
  -5   1   7 2346.48   59.90
   5  -1  -6   59.47    5.54
  -5   1   6   58.82    5.42
   5   1  -6   54.76    4.72
  -5  -1   6   67.07    5.75
  -5   1   6   56.49    5.04
   5   1  -5  759.33   23.42
   5  -1  -5  822.23   26.00
  -5   1   5  805.16   25.51
   5   1  -5  836.04   25.62
  -5  -1   5  814.85   25.33
  -5   1   5  748.34   24.60
  -5   1   4 1228.11   34.82
   5  -1  -4 1148.58   34.68
   5   1  -4 1145.80   32.23
   5   1  -4 1258.82   34.43
  -5  -1   4 1247.64   34.20
  -5   1   3  259.98   12.06
   5  -1  -3  269.11   12.49
   5   1  -3  241.62   11.18
  -5  -1   3  271.42   11.63
  -5   1   2  883.04   26.69
  -5  -1   2  848.13   23.26
   5  -1  -2  825.03   26.68
   5   1  -2  819.76   24.76
  -5  -1   2  831.06   24.84
  -5  -1   1  202.93    8.21
   5   1  -1  211.51    9.18
  -5  -1   1  198.47    9.13
  -5  -1   0  543.09   16.46
   5   1   0  552.94   17.14
  -5  -1   0  534.33   17.31
  -5   1   0  552.52   19.77
  -5  -1  -1  508.65   15.83
   5   1   1  536.09   16.26
  -5   1  -1  516.37   19.27
  -5  -1  -1  532.75   16.50
   5   1   2  116.79    5.72
  -5   1  -2  129.03    8.19
   5   1   3 1559.71   38.34
   5   1   3 1522.76   42.34
  -5  -1  -3 1616.11   38.61
  -5   1  -3 1590.49   43.86
   5   1   4  513.77   14.57
   5   1   4  516.88   18.31
  -5   1  -4  509.44   19.46
  -5  -1  -4  510.57   14.85
   5   1   5   90.04    4.16
   5   1   5   94.37    6.61
  -5   1  -5   92.23    7.31
  -5  -1  -5   93.12    4.41
   5   1   6 1071.10   30.48
   5  -1   6 1054.30   25.22
  -5  -1  -6 1044.75   25.50
   5   1   6 1051.05   30.75
  -5   1  -6 1067.18   33.12
  -5   1  -7 1641.50   47.08
   5  -1   7 1673.94   38.48
   5   1   7 1657.27   44.21
   5  -1   7 1633.83   38.99
   5   1   7 1683.76   44.64
  -5  -1  -7 1729.80   38.49
  -5   1  -8  276.65   13.86
   5   1   8  285.56   12.37
   5   1   8  287.32   12.19
   5  -1   8  281.36    7.90
   5  -1   8  277.10    8.13
  -5  -1  -8  268.58    7.35
  -5   1  -9 1992.68   56.82
   5   1   9 2120.38   54.31
   5   1   9 2029.72   53.70
   5  -1   9 2154.70   47.62
   5   1  10   53.33    4.81
   5   1  10   40.50    4.31
  -5   1 -10   56.35    6.05
   5  -1  10   48.83    2.16
   5   1  11  156.17    8.65
  -5   1 -11  154.20   10.32
   5   1  12  414.40   15.90
  -5   1 -12  405.13   18.18
   5   1  13   62.58    5.42
  -5   1 -13   48.50    5.74
   5   1  14  248.94   11.81
  -5   1 -14  257.71   13.92
   5   1  15  768.93   24.83
  -5   1 -15  748.75   27.26
   5   1  16   99.93    7.18
  -5   1 -16  102.59    8.44
   5   1  17  594.70   20.99
  -5   1 -17  567.15   22.74
  -5   1 -18   75.85    7.18
  -5   1 -19  196.18   11.91
  -5   1 -20  272.54   14.30
  -5   1 -21    6.84    2.61
  -5   1 -22  321.76   15.81
  -5   1 -23  295.69   14.98
  -5   1 -24    8.57    2.93
  -5   1 -25  226.21   12.70
   5   2 -27   39.20    7.25
   5  -2 -27   40.17    7.00
   5   2 -26   46.83    7.57
   5  -2 -26   51.10    7.69
   5  -2 -25    3.63    3.71
   5  -2 -25    2.25    3.12
   5   2 -25    2.30    2.60
   5  -2 -25    3.14    2.56
   5  -2 -24  169.71   14.20
   5  -2 -24  171.38   13.90
   5   2 -24  158.00   13.44
   5  -2 -24  178.10   13.51
   5  -2 -23   22.60    5.34
   5  -2 -23   15.83    4.59
   5   2 -23   18.79    5.12
   5  -2 -23   14.21    4.41
   5  -2 -22  562.36   26.34
   5  -2 -22  593.85   26.43
   5   2 -22  541.64   25.92
   5  -2 -22  520.19   24.92
   5  -2 -21   97.85   10.43
   5  -2 -21  107.65   10.43
   5   2 -21  102.35   10.32
   5  -2 -21  100.20    9.89
   5  -2 -20  422.53   21.39
   5  -2 -20  363.96   19.65
   5   2 -20  390.33   20.87
   5  -2 -20  390.84   20.35
   5  -2 -19   48.60    6.97
   5  -2 -19   58.60    7.68
   5   2 -19   57.17    7.49
  -5  -2  19   42.46    6.40
   5  -2 -18  354.10   18.81
   5   2 -18  310.23   18.05
   5  -2 -17   86.63    8.85
   5   2 -17   81.90    8.72
   5  -2 -16  860.56   31.88
   5   2 -16  851.25   32.38
   5  -2 -15    6.74    2.70
  -5  -2  15    3.12    2.16
   5   2 -15    9.78    3.29
   5  -2 -14  462.23   21.01
   5   2 -14  477.15   21.65
  -5  -2  14  472.19   20.39
   5  -2 -13   11.74    3.32
   5   2 -13    8.21    2.94
  -5  -2  13   11.52    3.13
   5  -2 -12 1259.35   40.42
   5   2 -12 1246.55   40.67
  -5  -2  12 1253.85   39.42
  -5   2  12 1356.50   36.26
   5  -2 -11  258.67   14.39
  -5   2  11  278.06   12.26
  -5  -2  11  297.90   14.75
   5  -2 -10   65.26    6.70
  -5   2  10   66.94    5.66
  -5  -2  10   66.27    6.48
  -5   2   9   68.35    5.70
  -5  -2   9   76.40    6.84
  -5   2   8  322.64   15.03
  -5   2   8  314.56   13.78
  -5  -2   8  328.84   14.95
  -5   2   7  248.85   12.65
   5   2  -7  255.66   10.85
  -5   2   7  239.20   11.65
  -5  -2   7  228.27   12.24
   5   2  -6 2027.83   49.14
  -5   2   6 2007.98   53.32
   5   2  -6 1853.75   52.47
  -5  -2   6 1859.57   52.26
  -5   2   6 1991.64   51.92
   5   2  -5  420.75   14.32
  -5   2   5  435.79   17.80
   5   2  -5  404.57   17.08
  -5   2   5  418.08   16.76
  -5  -2   5  448.27   17.34
  -5   2   4  261.74   13.10
   5   2  -4  274.94   10.26
   5   2  -4  271.79   12.81
  -5   2   4  269.54   12.84
  -5  -2   4  271.75   12.55
  -5   2   3   15.02    2.93
   5   2  -3   15.33    2.06
  -5   2   3   16.31    3.11
   5   2  -3   17.34    2.95
  -5  -2   3   14.36    2.71
   5   2  -2   18.55    3.00
  -5  -2   2   20.55    3.13
   5   2  -1  368.31   14.33
  -5  -2   1  349.36   14.20
   5   2   0 1823.55   47.09
  -5  -2   0 1770.58   47.20
   5  -2   0 1852.05   44.32
  -5   2  -1   68.44    6.36
  -5  -2  -1   66.09    5.13
   5   2   1   64.73    5.02
   5  -2   1   69.70    3.98
  -5   2  -2 2160.12   57.35
  -5  -2  -2 2074.24   52.57
   5   2   2 2166.68   52.82
   5  -2   2 2074.14   48.87
  -5  -2  -3   38.72    2.23
   5   2   3   35.43    3.51
  -5  -2  -3   37.48    3.70
   5  -2   3   40.57    2.41
  -5   2  -4 1496.28   44.18
  -5  -2  -4 1589.28   35.23
   5   2   4 1462.38   38.52
  -5  -2  -4 1469.65   38.89
   5  -2   4 1476.25   34.16
  -5   2  -5   97.96    8.02
   5   2   5   83.38    6.92
  -5  -2  -5   94.78    5.67
   5   2   6  304.32   14.09
  -5  -2  -6  303.51   11.14
   5  -2   6  281.58   11.13
   5   2   7  187.93   10.69
   5  -2   7  200.59    8.66
  -5  -2  -7  193.35    8.30
   5   2   8  540.11   20.09
  -5  -2  -8  508.06   16.03
   5  -2   8  517.10   16.24
   5   2   9   93.89    7.34
   5  -2   9   82.22    5.05
  -5  -2  -9   78.93    4.86
   5   2  10 1483.99   41.31
  -5  -2 -10 1390.26   35.58
   5  -2  10 1398.79   36.01
   5   2  11  175.24   10.30
  -5  -2 -11  151.21    6.82
   5  -2  11  149.16    7.05
   5   2  11  161.71    8.65
   5   2  12    2.58    1.26
   5   2  12    3.61    1.85
  -5  -2 -12    1.22    0.87
   5  -2  12    3.24    1.20
   5   2  13   52.29    4.64
   5   2  13   47.84    5.45
  -5  -2 -13   46.37    3.37
   5  -2  13   49.06    3.66
   5   2  14    1.24    1.82
  -5  -2 -14    3.74    1.08
   5  -2  14    4.48    1.24
   5   2  15    5.69    2.55
  -5  -2 -15    8.83    1.64
   5  -2  15    4.99    1.46
   5   2  16 1446.53   43.58
  -5  -2 -16 1560.53   37.01
   5  -2  16 1464.46   37.37
   5   2  17    8.62    3.07
  -5  -2 -17   12.95    1.95
   5  -2  17   10.66    2.00
  -5  -2 -17   13.60    1.89
  -5   2 -18  326.88   17.24
   5   2  18  334.14   16.10
  -5  -2 -18  334.31   11.02
  -5  -2 -18  333.03   10.77
   5  -2  18  341.48   11.64
  -5   2 -19   19.29    4.11
   5   2  19   17.81    3.65
  -5  -2 -19   15.48    2.02
  -5  -2 -19   13.16    1.80
  -5  -2 -20  197.52    7.68
  -5  -2 -20  208.45    7.62
  -5   2 -21   49.03    6.60
  -5  -2 -21   54.92    3.66
  -5  -2 -21   57.53    3.64
  -5  -2 -22  340.40   10.73
  -5  -2 -22  321.86   10.43
  -5   2 -23    9.97    3.61
  -5   2 -24  194.14   12.99
  -5   2 -25   32.47    5.40
  -5   2 -26  611.56   24.94
   5   3 -25    7.46    3.63
   5  -3 -25    2.27    3.14
   5  -3 -24  442.35   24.25
   5   3 -24  460.90   24.73
   5  -3 -23   34.28    6.67
   5  -3 -23   29.35    6.38
   5   3 -23   27.68    5.81
  -5  -3  23   28.33    5.69
   5  -3 -22   26.31    6.01
   5   3 -22   29.56    6.40
  -5  -3  22   28.45    5.59
   5  -3 -21   11.05    4.23
   5   3 -21   17.41    5.16
  -5  -3  21   25.62    5.32
   5  -3 -20   31.00    6.13
   5   3 -20   29.64    6.00
  -5  -3  20   40.11    6.34
   5  -3 -19    6.19    3.44
   5   3 -19    4.44    2.72
   5  -3 -18  875.05   33.66
   5   3 -18  859.06   34.45
   5  -3 -17    4.80    2.81
   5   3 -17    5.23    3.21
   5  -3 -17    3.78    2.77
   5  -3 -16  168.23   12.54
   5  -3 -16  162.50   12.33
   5   3 -16  151.20   12.57
  -5   3  15   27.69    3.60
   5  -3 -15   29.98    5.32
   5  -3 -15   33.17    5.53
   5   3 -15   32.41    5.84
  -5  -3  15   29.00    5.00
   5  -3 -14   75.44    8.03
   5   3 -14   81.65    8.69
  -5   3  14   74.56    5.88
  -5  -3  14   63.86    7.37
   5  -3 -13  182.37   12.31
   5   3 -13  184.37   13.01
  -5   3  13  163.97    9.23
  -5  -3  13  157.83   11.39
   5  -3 -12  855.43   30.19
   5   3 -12  762.82   30.38
  -5  -3  12  832.53   29.82
  -5   3  12  829.91   26.28
   5  -3 -11   16.14    3.60
  -5   3  11   19.93    3.83
  -5   3  11   17.68    3.17
  -5  -3  11   12.61    3.44
   5  -3 -10  816.32   28.30
  -5   3  10  784.32   27.83
  -5   3  10  808.79   26.06
  -5  -3  10  757.81   27.96
   5  -3  -9   -0.65    1.69
  -5   3   9    1.11    1.45
  -5  -3   9    0.70    1.44
   5  -3  -8  486.62   19.38
  -5   3   8  504.33   19.27
  -5  -3   8  460.74   19.84
   5  -3  -7   18.06    3.28
  -5   3   7   20.26    3.59
  -5  -3   7   17.85    3.42
  -5   3   6  209.85   11.68
   5   3  -6  187.34   11.71
  -5  -3   6  200.00   11.66
   5   3  -5  513.34   16.22
  -5   3   5  551.57   21.14
   5   3  -5  539.82   21.28
  -5  -3   5  553.75   21.11
  -5   3   4  226.91   12.50
   5   3  -4  198.20    8.04
  -5  -3   4  221.95   11.93
   5   3  -4  228.99   12.34
  -5   3   3    1.99    1.50
   5   3  -3    0.81    0.77
   5  -3  -3    1.64    1.20
   5   3  -3    3.04    1.86
  -5  -3   3    1.18    1.44
   5   3  -2 1913.10   44.38
   5  -3  -2 1832.95   48.51
   5   3  -2 1960.79   52.31
  -5  -3   2 1865.55   51.67
   5  -3  -1    3.43    1.27
   5   3  -1    2.84    1.74
  -5  -3   1    1.11    1.26
  -5  -3   0  102.73    7.37
   5   3   0   84.69    6.80
   5  -3   0   90.74    5.44
  -5  -3  -1   30.78    4.01
   5  -3   1   27.50    2.74
  -5  -3  -2    2.53    1.48
   5   3   2    0.50    1.03
   5  -3   2    1.66    0.79
  -5  -3  -3   21.22    3.47
   5  -3   3   18.92    1.95
  -5  -3  -4 1508.07   41.52
  -5  -3  -5   -0.47    1.39
  -5  -3  -6  710.50   22.63
   5   3   6  631.65   24.87
  -5  -3  -7   73.09    5.79
   5   3   7   62.12    6.72
  -5  -3  -8  632.76   21.17
   5   3   8  655.41   24.86
  -5  -3  -9  222.69    6.51
  -5  -3  -9  255.39   11.31
   5   3   9  258.52   13.85
  -5  -3 -10  419.12   15.66
   5   3  10  416.66   18.80
  -5  -3 -11   23.44    3.31
   5   3  11   24.33    4.49
  -5  -3 -12  468.28   16.75
   5   3  12  470.78   20.45
  -5  -3 -13  112.62    7.09
   5   3  13  100.05    8.80
  -5  -3 -14  436.49   15.75
   5   3  14  400.73   18.98
   5   3  15    4.35    1.71
  -5  -3 -15    4.19    1.60
   5   3  15    1.54    1.88
   5   3  16   10.27    2.15
  -5  -3 -16    9.19    2.13
   5   3  17   60.12    7.05
  -5  -3 -17   59.57    5.07
   5   3  18   56.65    6.90
  -5  -3 -18   65.07    5.24
   5   3  19   24.57    4.80
  -5  -3 -19   14.93    2.73
   5   3  20  626.11   25.54
  -5  -3 -20  603.38   19.91
   5   3  21   17.64    4.27
  -5  -3 -21   19.99    3.02
   5  -3  22  236.33   10.87
  -5   3 -25   24.63    5.33
  -5   3 -26  121.66   11.26
   5  -4 -22  311.24   19.30
   5   4 -22  263.93   19.01
   5   4 -21   74.61    9.90
  -5  -4  21   71.77    9.25
   5  -4 -20   48.65    7.98
   5   4 -20   32.14    6.61
  -5  -4  20   38.74    6.37
   5  -4 -19  127.34   12.06
   5   4 -19  118.33   11.93
  -5  -4  19  143.59   11.91
   5  -4 -18   55.85    8.13
   5   4 -18   61.21    8.79
   5  -4 -17  826.67   33.04
   5   4 -17  763.26   32.83
  -5   4  17  785.41   24.44
   5  -4 -16  103.01   10.26
   5   4 -16  103.85   10.85
  -5   4  16  104.24    7.11
   5  -4 -15   81.07    8.91
   5   4 -15   60.80    8.21
  -5  -4  15   54.14    7.33
  -5   4  15   68.27    5.93
   5  -4 -14  117.50   10.48
   5   4 -14  105.21   10.42
  -5   4  14  129.59    8.39
  -5  -4  14  116.87   10.19
  -5   4  13    7.82    2.37
   5  -4 -13   15.09    4.02
   5   4 -13    8.16    3.65
  -5  -4  13    9.66    3.54
  -5   4  12  269.68   14.88
   5  -4 -12  279.36   15.82
   5   4 -12  278.01   16.92
  -5   4  12  282.64   13.56
  -5  -4  12  275.58   15.88
   5  -4 -11 1138.07   37.58
  -5   4  11 1071.08   36.41
  -5  -4  11 1117.63   38.03
  -5   4  11 1186.00   35.21
   5  -4 -10    5.30    2.62
  -5   4  10    3.19    2.21
  -5   4  10    2.26    2.20
  -5  -4  10    2.49    2.03
  -5   4   9  264.31   14.62
  -5   4   9  261.21   13.71
  -5  -4   9  267.68   15.36
   5  -4  -9  283.29   14.79
  -5   4   8  174.64   11.34
  -5   4   8  181.21   11.90
  -5  -4   8  180.58   12.18
   5  -4  -8  191.50   11.62
  -5   4   7  182.39   11.48
  -5   4   7  165.98   11.36
  -5  -4   7  172.51   11.73
   5  -4  -7  166.48   10.52
  -5   4   6  660.23   25.60
  -5   4   6  665.11   25.28
  -5  -4   6  683.59   26.02
   5   4  -6  682.87   26.70
   5  -4  -6  641.44   23.61
  -5   4   5  434.95   19.66
  -5  -4   5  428.85   19.28
   5   4  -5  413.17   19.62
   5  -4  -5  435.85   17.57
   5   4  -4   51.52    3.43
   5   4  -4   44.73    5.90
  -5  -4   4   52.38    6.19
   5  -4  -4   49.91    5.16
   5   4  -3   96.91    4.28
  -5   4   3  105.78    8.90
  -5  -4   3   99.02    8.33
   5   4  -3   86.77    7.97
   5   4  -2   64.09    2.56
  -5  -4   2   75.31    7.17
   5   4  -2   76.00    7.27
   5   4  -1 1022.21   34.01
  -5  -4   1 1079.15   34.38
   5  -4   0 1047.92   29.50
   5   4   0 1024.62   33.36
  -5  -4   0  987.02   33.00
   5  -4   1    7.51    1.94
  -5  -4  -1    5.93    2.51
   5   4   2   49.74    6.41
  -5  -4  -2   43.68    5.41
   5   4   3  111.25    9.65
  -5  -4  -3  121.81    8.85
  -5  -4  -4  346.40   16.04
   5  -4   4  344.14   15.90
  -5  -4  -5 1083.91   34.46
   5  -4   5 1123.57   34.58
  -5  -4  -6  469.46   19.02
   5  -4   6  434.36   18.47
   5  -4   7  268.01   13.53
  -5  -4  -7  258.59   13.37
  -5  -4  -8   85.49    7.30
   5  -4   8   92.26    7.47
   5   4   9    9.45    3.28
   5  -4   9   14.34    3.08
  -5  -4  -9   13.21    3.20
   5   4  10  464.93   21.51
  -5  -4 -10  457.33   18.70
   5  -4  10  455.42   18.55
   5   4  10  492.05   18.56
   5   4  11  569.80   24.09
  -5  -4 -11  509.16   20.09
   5  -4  11  527.37   20.15
   5   4  11  533.36   19.64
   5   4  12   73.98    8.05
  -5  -4 -12   60.12    6.07
   5  -4  12   60.13    5.97
   5   4  12   66.94    5.95
   5   4  13  437.73   21.37
   5  -4  13  479.23   18.73
  -5  -4 -13  469.40   18.80
   5   4  13  482.23   17.77
   5  -4  14   26.79    4.06
  -5  -4 -14   32.41    4.57
   5   4  14   35.03    5.85
  -5  -4 -15  306.95   10.44
   5  -4  15  304.56   14.24
  -5  -4 -15  324.07   14.75
  -5  -4 -16  405.47   13.61
   5   4  16  430.30   20.99
  -5  -4 -16  435.85   17.64
   5  -4  16  449.33   17.64
   5   4  17    5.01    1.81
  -5  -4 -17    2.66    1.23
   5   4  17    1.84    2.41
  -5  -4 -17    4.08    2.02
   5  -4  17    3.40    1.57
  -5  -4 -18   12.50    2.37
   5   4  18   14.98    4.07
  -5  -4 -18   17.99    3.57
   5  -4  18   18.15    3.49
  -5  -4 -19    4.64    1.74
   5   4  19   -0.95    2.49
  -5  -4 -19    2.31    1.85
   5  -4  19    3.37    1.80
   5   4  20   58.55    7.84
  -5  -4 -20   65.93    6.22
   5  -4  20   56.01    5.88
   5   4  21  426.45   21.73
   5  -4  21  460.02   18.08
   5  -4  22  149.02    9.38
   5  -4  23   17.67    3.29
  -5   5  19  346.71   13.58
  -5   5  18    3.70    2.01
   5   5 -18    3.92    3.81
   5  -5 -17  134.74   12.37
   5   5 -17  111.18   11.94
  -5   5  17  107.59    7.67
  -5   5  16    1.10    1.60
   5  -5 -16    4.38    2.86
   5   5 -16    2.50    2.83
   5  -5 -15  187.54   14.37
   5   5 -15  205.58   15.69
  -5  -5  15  173.48   13.55
  -5   5  15  203.11   11.20
  -5   5  14    4.92    2.48
   5  -5 -14    2.01    2.63
   5   5 -14    1.20    2.47
  -5  -5  14    6.03    3.08
   5  -5 -13  757.93   30.51
   5   5 -13  798.84   33.42
  -5   5  13  769.27   26.71
  -5  -5  13  715.99   30.03
  -5   5  12   -0.69    1.80
  -5   5  12    0.82    1.99
   5  -5 -12    0.92    2.83
   5   5 -12    3.42    3.33
  -5  -5  12    0.98    2.55
   5  -5 -11   35.36    5.58
  -5   5  11   26.22    4.90
  -5   5  11   37.79    5.40
  -5  -5  11   34.67    5.88
  -5   5  10   72.54    7.31
  -5   5  10   66.34    7.40
   5  -5 -10   65.97    7.63
  -5  -5  10   60.54    7.80
   5  -5  -9    0.81    1.84
  -5   5   9    0.77    1.59
  -5   5   9    2.47    2.16
  -5  -5   9    0.93    2.27
   5  -5  -8   61.52    6.79
  -5   5   8   52.68    6.72
  -5   5   8   66.16    7.24
  -5  -5   8   51.09    6.80
  -5   5   7  910.86   33.29
   5  -5  -7  950.78   32.49
  -5  -5   7 1004.70   35.20
   5   5  -7  958.57   35.57
  -5   5   6   54.08    6.95
   5  -5  -6   54.42    6.30
   5   5  -6   53.15    7.16
  -5  -5   6   53.92    7.03
  -5   5   5  365.71   18.28
   5   5  -5  322.12   18.00
  -5  -5   5  353.07   18.08
   5  -5  -5  302.18   15.57
  -5   5   4    0.87    2.26
   5   5  -4    4.51    2.63
  -5  -5   4    5.14    2.74
   5  -5  -4    6.50    2.69
  -5   5   3  100.60    9.30
   5   5  -3   96.82    3.77
   5  -5  -3   98.19    7.80
  -5  -5   3   84.37    8.61
   5   5  -3   85.18    8.75
  -5   5   2   29.08    5.11
   5  -5  -2   20.61    3.64
  -5  -5   2   24.07    4.63
  -5  -5   1  181.98   12.35
   5   5   0   -0.98    2.56
  -5  -5   0    0.81    2.25
   5   5   1  561.77   25.18
   5  -5   1  550.55   23.24
  -5  -5  -1  520.49   22.77
   5   5   2   -0.98    2.70
   5  -5   2    0.80    2.23
  -5  -5  -2    0.80    2.10
   5   5   3  724.38   29.47
   5  -5   3  695.99   27.06
  -5  -5  -3  715.85   27.48
   5   5   4    3.88    2.20
   5  -5   4    0.79    2.19
  -5  -5  -4    5.54    2.64
   5   5   5    5.87    3.13
   5  -5   5    2.36    2.05
  -5  -5  -5    1.57    2.29
   5   5   6   -0.98    2.03
   5  -5   6    0.78    2.16
  -5  -5  -6    3.11    2.49
   5   5   7  111.17   10.53
  -5  -5  -7  118.33    9.62
   5  -5   7  131.08   10.03
  -5  -5  -8   10.02    3.42
   5  -5   8    9.85    3.43
   5  -5   9  923.40   31.55
  -5  -5  -9  877.01   31.42
  -5  -5 -10    0.76    2.11
   5  -5  10    0.74    1.94
  -5  -5 -11  230.72   13.64
   5  -5  11  237.39   13.60
   5   5  12   53.71    7.50
   5  -5  12   44.10    5.81
  -5  -5 -12   42.94    5.99
   5   5  12   45.85    5.40
   5   5  13    5.53    2.17
  -5  -5 -13    5.97    2.84
   5  -5  13    8.73    3.08
   5   5  13    2.05    2.84
   5   5  14    6.32    2.18
   5   5  14   -1.03    2.85
   5  -5  14    5.71    2.72
  -5  -5 -14    5.22    2.76
   5   5  15  190.29   14.07
   5  -5  15  193.19   11.89
  -5  -5 -15  178.93   11.82
   5   5  15  160.79    9.37
   5   5  16    1.82    1.57
   5   5  16    3.13    2.89
  -5  -5 -16   -0.74    2.17
   5  -5  16    2.83    2.35
   5  -5  17  355.42   16.95
  -5  -5 -17  362.58   17.47
   5   5  18   -0.69    1.15
  -5  -5 -18   -0.74    2.04
   5  -5  18    0.70    1.58
   5  -5  19  182.98   11.62
   5  -5  20    0.69    1.80
   5  -5  21    2.74    2.10
  -5   6  17  172.26   10.38
  -5   6  16   93.69    7.94
  -5   6  15   80.52    7.45
   5  -6 -14  112.51   11.09
  -5   6  14  112.03    9.09
  -5   6  13   11.23    3.39
   5  -6 -13    5.26    3.64
  -5   6  12  143.61   10.86
  -5   6  12  128.25   10.89
   5  -6 -12  127.04   11.44
  -5   6  11  448.96   21.29
  -5   6  11  427.30   20.29
   5  -6 -11  453.01   22.36
  -5   6  10    1.75    2.56
  -5   6  10    3.38    2.47
   5  -6 -10    1.90    2.15
  -5   6   9  184.53   12.96
  -5   6   9  185.33   12.83
   5  -6  -9  175.64   13.06
  -5  -6   9  201.50   14.61
  -5   6   8   53.82    7.07
   5  -6  -8   49.86    6.82
   5   6  -8   44.31    7.35
  -5  -6   8   52.91    7.50
   5  -6  -7   28.34    5.25
  -5   6   7   36.50    6.12
  -5  -6   7   42.08    6.75
  -5   6   6  190.52   13.50
   5  -6  -6  204.47   13.16
  -5  -6   6  199.14   14.38
  -5   6   5   44.79    6.65
  -5  -6   5   56.17    7.83
  -5   6   4   22.78    4.90
   5   6  -4   15.80    1.62
  -5  -6   4   15.88    4.41
   5   6  -4   24.58    5.47
  -5   6   3  116.28   10.68
  -5  -6   3  125.47   11.14
   5   6  -3  123.64   11.80
  -5   6   2   16.59    4.61
  -5  -6   2    5.84    2.99
   5  -6  -2   15.88    4.59
   5   6  -2   16.62    4.59
  -5   6   1  598.42   26.59
   5  -6  -1  586.64   26.34
  -5  -6   1  614.67   26.60
   5   6  -1  598.38   27.76
  -5  -6   0    9.63    3.56
   5  -6   0    9.75    3.83
   5   6   0   12.11    4.07
  -5  -6  -1   12.51    3.89
   5  -6   1   18.33    4.56
   5   6   1   13.14    4.53
   5  -6   2  241.61   15.58
  -5  -6  -2  260.31   15.95
   5   6   2  219.88   15.86
   5  -6   3   27.72    5.33
  -5  -6  -3   25.73    5.46
   5   6   3   29.80    6.23
  -5  -6  -4  236.26   15.51
   5  -6   4  251.84   15.90
   5   6   4  269.88   17.49
  -5  -6  -5  685.90   28.51
   5  -6   5  695.19   28.47
   5   6   5  682.12   29.93
  -5  -6  -6   15.99    4.35
   5  -6   6    9.23    3.53
   5   6   6   13.31    4.59
  -5  -6  -7   69.12    8.25
   5  -6   7   70.34    8.21
   5   6   7   49.83    7.77
  -5  -6  -8   34.41    6.00
   5  -6   8   33.13    5.83
   5   6   8   31.36    6.16
  -5  -6  -9   64.92    7.80
   5  -6   9   64.32    7.70
   5   6   9   71.02    9.13
  -5  -6 -10  114.16   10.52
   5  -6  10  123.77   10.72
  -5  -6 -11  298.98   17.20
   5  -6  11  291.12   16.80
   5  -6  12    5.27    3.25
  -5  -6 -12    7.29    3.47
  -5  -6 -13  102.37    9.80
   5  -6  13  105.27    9.93
   5   6  14   10.58    2.88
   5  -6  14    7.71    3.46
  -5  -6 -14    7.21    3.34
   5  -6  15  230.34   14.49
  -5  -6 -15  239.90   14.99
   5   6  15  228.15   12.00
   5  -6  16   68.24    7.92
   5  -6  17  124.48   10.67
   5  -6  18  118.35   10.43
  -5   7  14    3.18    2.65
  -5   7  13   64.14    7.47
  -5   7  12  128.87   10.76
  -5   7  11    2.73    3.03
  -5   7  11    1.82    2.91
  -5   7  10  263.95   16.09
  -5   7  10  261.04   16.29
  -5   7   9   13.01    4.13
  -5   7   9   13.49    4.37
  -5   7   8  324.60   18.28
  -5   7   7   64.37    8.30
  -5   7   6   15.71    4.46
  -5   7   5   15.95    4.62
  -5   7   4   37.38    6.38
  -5   7   3   -2.06    3.02
  -5   7   2  657.01   28.84
  -5   7   1   85.18    9.66
  -5   7   0  159.54   13.44
   6   0 -27   -1.16    2.62
   6   0 -26    1.79    1.83
   6   0 -26    7.96    3.64
   6   0 -25   -0.60    1.76
   6   0 -25    1.12    2.53
   6   0 -24   67.62    8.79
   6   0 -24   67.51    6.47
   6   0 -23    0.62    1.80
   6   0 -23   -1.07    2.79
   6   0 -22 1599.85   46.21
   6   0 -22 1710.82   53.47
   6   0 -21   -0.63    1.74
   6   0 -21    1.02    2.49
   6   0 -20  459.69   22.59
   6   0 -20  451.70   18.78
   6   0 -19   -1.28    1.33
   6   0 -19    0.97    2.36
   6   0 -18  316.44   15.29
   6   0 -18  343.68   18.57
   6   0 -17    1.95    1.90
   6   0 -17   -0.91    1.88
   6   0 -16 1091.67   34.84
   6   0 -16 1142.63   38.49
   6   0 -15   -0.78    1.91
   6   0 -15    0.66    1.35
   6   0 -15   -0.85    2.36
   6   0 -14  630.73   24.85
   6   0 -14  636.18   23.76
   6   0 -14  658.38   25.99
   6   0 -13    0.72    1.89
   6   0 -13    1.30    1.69
   6   0 -12 3695.93   91.13
   6   0 -12 3487.36   89.43
   6   0 -11    0.66    1.50
   6   0 -11    2.55    1.86
   6   0 -10   29.77    4.50
   6   0 -10   25.91    4.13
   6   0  -9   -0.61    1.26
   6   0  -9   -0.62    1.52
   6   0  -8   48.02    5.34
   6   0  -8   59.92    6.00
   6   0  -7   -0.61    1.38
   6   0  -7    1.20    1.35
  -6   0   6 4482.80  102.35
   6   0  -6 4140.32  104.29
   6   0  -6 4290.76  104.21
  -6   0   5    0.46    1.36
   6   0  -5   -0.59    1.22
   6   0  -5   -0.53    1.09
  -6   0   4  257.49   11.77
   6   0  -4  242.45   12.54
   6   0  -4  258.73   12.11
  -6   0   3    1.37    1.27
   6   0  -3    0.46    1.04
  -6   0   2  463.94   16.89
   6   0  -2  441.43   16.25
  -6   0   1    0.45    0.94
  -6   0   1    0.57    1.28
   6   0  -1    0.38    0.87
  -6   0   0 2297.65   56.57
  -6   0   0 2205.00   58.30
   6   0   0 2140.36   54.28
  -6   0  -1   -0.58    1.41
   6   0   1    0.31    1.03
  -6   0  -2 5931.49  133.78
   6   0   2 5544.95  127.85
  -6   0  -3    0.59    1.54
   6   0   3    0.91    0.81
   6   0   4  956.41   24.57
  -6   0  -4  999.94   31.31
  -6   0  -5    2.42    1.68
   6   0   5    1.53    0.59
   6   0   6   98.80    3.45
  -6   0  -6  105.19    8.06
   6   0   7    0.33    0.81
  -6   0  -7    1.25    1.29
   6   0   8 1081.34   29.08
  -6   0  -8 1039.05   33.65
   6   0   9    0.32    1.16
  -6   0  -9    1.29    1.69
   6   0  10 2432.63   59.18
  -6   0 -10 2446.99   65.24
   6   0  11   -0.33    1.13
  -6   0 -11    0.67    1.85
   6   0  12  199.20    8.80
  -6   0 -12  190.09   11.59
   6   0  13    0.68    1.09
  -6   0 -13   -0.68    1.40
   6   0  14   17.08    2.69
  -6   0 -14   23.74    4.18
  -6   0 -15    2.71    1.88
  -6   0 -16 2427.20   64.77
  -6   0 -17    0.67    1.75
  -6   0 -18 1154.96   36.09
  -6   0 -19    1.31    2.01
  -6   0 -20   44.20    5.45
  -6   0 -21    0.64    1.57
  -6   0 -22   87.12    7.48
  -6   0 -23   -0.63    1.53
  -6   0 -24  491.67   19.62
   6   1 -27  116.52    9.08
   6   1 -26  383.65   21.64
   6   1 -26  308.03   15.69
   6  -1 -26  351.95   20.38
   6  -1 -25   20.63    3.43
   6  -1 -25   18.06    5.12
   6   1 -25   18.89    3.85
   6   1 -25   22.37    5.29
   6  -1 -25   24.18    5.58
   6   1 -25   15.13    4.58
   6   1 -24  200.29   14.74
   6  -1 -24  191.63   10.67
   6  -1 -24  184.96   14.66
   6   1 -24  197.44   15.12
   6   1 -24  187.72   11.78
   6  -1 -24  158.98   13.40
   6   1 -23  167.19   13.15
   6  -1 -23  161.73    9.76
   6  -1 -23  147.11   12.95
   6   1 -23  167.86   13.60
   6   1 -23  152.25   10.58
   6  -1 -23  157.47   12.85
   6  -1 -22    9.60    2.61
   6   1 -22    5.06    2.32
   6   1 -22    6.99    3.20
   6  -1 -22    6.51    3.33
   6  -1 -22    7.18    3.42
   6   1 -22    2.18    2.86
   6   1 -21  147.31   11.74
   6  -1 -21  143.57   12.23
   6  -1 -21  141.87    9.14
   6   1 -21  138.36   12.01
   6   1 -21  124.16    9.65
   6  -1 -21  145.74   12.12
   6  -1 -20  205.79   14.44
   6   1 -20  181.33   13.05
   6  -1 -20  174.31   10.38
   6   1 -20  180.11   13.66
   6  -1 -20  183.25   13.37
   6   1 -19  141.18   11.23
   6  -1 -19  149.03   11.97
   6   1 -19  144.75   11.90
   6  -1 -19  118.98    8.63
   6  -1 -19  149.35   11.94
   6   1 -18 1506.66   47.00
   6  -1 -18 1543.40   48.78
   6  -1 -18 1576.02   48.97
   6  -1 -18 1436.73   42.79
   6   1 -18 1577.09   49.42
   6  -1 -17   23.37    3.95
   6   1 -17   31.26    5.21
   6  -1 -17   22.78    5.01
   6   1 -17   19.88    4.90
   6  -1 -17   24.56    4.71
   6   1 -16  726.89   26.68
   6  -1 -16  678.19   27.46
   6  -1 -16  654.77   23.76
   6  -1 -16  660.16   27.01
   6   1 -16  627.78   27.15
   6   1 -15  683.06   26.18
   6  -1 -15  686.54   24.68
   6  -1 -15  745.38   28.62
   6   1 -15  749.11   28.87
   6  -1 -14    4.89    1.87
   6   1 -14    2.11    1.59
   6  -1 -14    1.68    2.33
   6   1 -13  358.27   16.62
   6  -1 -13  343.38   15.65
   6   1 -12  116.34    8.57
   6  -1 -12  101.57    7.96
   6  -1 -11   23.82    3.98
   6   1 -11   24.19    3.87
   6   1 -10 1267.70   36.98
   6  -1 -10 1219.80   37.34
  -6   1   9  181.49   10.52
   6  -1  -9  160.69   10.16
   6   1  -9  151.16   10.38
  -6   1   8   85.86    7.12
   6  -1  -8  103.34    7.86
   6   1  -8   84.11    7.44
   6   1  -8  106.83    8.19
  -6   1   8   94.89    7.24
   6  -1  -7 1184.46   36.28
  -6   1   7 1178.62   35.84
   6   1  -7 1193.76   36.83
  -6   1   7 1248.51   35.90
  -6  -1   7 1183.48   36.36
   6   1  -7 1205.14   36.51
   6   1  -6  119.09    7.46
  -6   1   6  105.36    7.77
   6  -1  -6  110.65    8.20
   6   1  -6  123.81    8.49
   6   1  -6  111.09    8.42
  -6   1   6  110.66    7.86
  -6  -1   6  103.49    7.82
   6   1  -5 1543.38   42.10
  -6   1   5 1646.01   44.89
   6  -1  -5 1600.19   45.21
   6   1  -5 1578.20   44.13
  -6   1   5 1526.36   43.87
  -6  -1   5 1617.88   44.43
  -6   1   4 1568.47   44.61
   6  -1  -4 1591.48   45.25
   6   1  -4 1640.61   44.14
  -6  -1   4 1600.74   44.04
  -6   1   3  372.49   15.99
  -6  -1   3  359.45   13.36
   6  -1  -3  395.07   16.74
   6   1  -3  371.76   15.04
  -6  -1   3  384.21   15.30
   6  -1  -2 1388.54   40.21
  -6  -1   2 1355.36   35.92
  -6   1   2 1317.10   39.05
   6   1  -2 1389.27   37.53
  -6  -1   2 1362.47   37.71
  -6  -1   1  144.55    7.38
   6   1  -1  151.57    7.99
  -6   1   1  124.03    8.87
  -6  -1   1  140.30    7.98
  -6  -1   0  634.52   19.48
   6   1   0  609.36   19.78
  -6   1   0  631.32   23.03
  -6  -1   0  658.10   20.48
  -6  -1  -1  561.25   18.22
  -6   1  -1  583.26   21.94
  -6  -1  -1  566.61   18.58
  -6  -1  -2  375.92   13.52
   6   1   2  384.70   12.98
  -6  -1  -2  371.78   13.31
  -6   1  -2  373.75   16.63
   6   1   3  443.01   13.57
  -6   1  -3  425.70   17.98
   6   1   4 1609.75   38.43
  -6  -1  -4 1539.44   38.82
  -6   1  -4 1556.82   45.44
  -6   1  -5    1.96    1.35
   6   1   5    2.54    0.87
  -6   1  -6 1771.59   50.43
   6  -1   7  655.22   16.99
   6   1   7  612.94   21.37
   6  -1   7  634.43   16.65
  -6   1  -7  650.02   24.51
   6  -1   8  205.81    6.81
   6   1   8  201.55   10.20
   6  -1   8  198.17    6.25
  -6   1  -8  199.47   12.15
   6   1   9  722.62   23.61
   6  -1   9  717.89   18.22
  -6   1  -9  768.79   27.34
   6  -1  10    5.95    0.99
   6   1  10    7.65    2.42
  -6   1 -10    7.30    2.62
   6   1  11  626.44   21.19
  -6   1 -11  584.45   23.93
   6   1  12 1432.68   39.46
  -6   1 -12 1380.38   43.27
   6   1  13    6.43    2.10
  -6   1 -13    3.05    1.87
   6   1  14  429.64   16.82
  -6   1 -14  434.63   19.75
   6   1  15  113.30    7.84
  -6   1 -15  116.20    9.46
   6   1  16  260.19   12.53
  -6   1 -16  242.24   14.26
   6   1  17  561.16   20.60
  -6   1 -17  584.96   23.73
   6   1  18  147.62    9.10
  -6   1 -18  155.89   10.92
  -6   1 -19   90.71    8.29
  -6   1 -20  188.30   12.12
  -6   1 -21   20.26    4.24
  -6   1 -22  777.59   28.24
  -6   1 -23  326.47   16.37
  -6   1 -24    0.73    2.13
  -6   1 -25   61.34    6.89
   6   2 -25  184.00   15.00
   6  -2 -25  185.76   14.35
   6  -2 -24    8.56    3.91
   6   2 -24    3.59    2.71
   6  -2 -24    9.80    3.90
   6  -2 -23  786.62   33.01
   6  -2 -23  812.60   33.24
   6   2 -23  720.81   32.09
   6  -2 -23  664.27   30.11
   6  -2 -22  114.58   11.59
   6  -2 -22  121.68   11.64
   6   2 -22   94.05   10.48
   6  -2 -22  108.09   10.71
   6  -2 -21   98.70   10.50
   6   2 -21  102.15   10.67
   6  -2 -21   85.31    9.44
   6  -2 -20    5.38    3.30
   6  -2 -20    6.17    3.15
   6   2 -20    6.58    3.04
   6  -2 -19  105.27   10.50
   6   2 -19  109.31   10.69
   6  -2 -19  110.06   10.48
   6  -2 -18    8.07    3.49
   6   2 -18    5.23    2.90
   6  -2 -17  989.52   36.38
   6   2 -17 1009.95   37.21
  -6  -2  17  980.90   35.68
   6  -2 -16   13.22    3.81
  -6  -2  16    9.69    3.26
   6   2 -16    4.93    3.29
   6  -2 -15   57.46    7.13
   6   2 -15   49.54    6.90
  -6  -2  15   45.73    6.30
   6  -2 -14  120.51   10.38
   6   2 -14  147.72   11.65
  -6  -2  14  144.48   10.80
   6   2 -13   26.72    4.22
   6  -2 -13   16.21    4.04
  -6  -2  13   22.01    4.73
   6   2 -12  227.72   12.25
   6  -2 -12  228.35   14.10
  -6   2  12  233.99   11.83
  -6  -2  12  245.89   13.93
   6   2 -11 2033.40   55.14
  -6  -2  11 2115.18   58.11
  -6   2  11 2083.31   55.06
  -6   2  10    0.67    1.76
  -6   2  10    5.06    2.20
  -6  -2  10    0.70    1.30
  -6   2   9 1656.88   47.72
  -6  -2   9 1650.15   47.85
  -6   2   9 1665.76   46.14
  -6   2   8   17.29    3.60
  -6   2   8   24.47    3.86
   6   2  -8   13.39    3.46
  -6  -2   8   14.96    3.26
  -6   2   7  723.63   26.38
   6   2  -7  733.44   23.31
   6   2  -7  788.25   27.03
  -6  -2   7  689.95   25.52
  -6   2   7  768.80   25.81
  -6   2   6  521.58   21.00
   6   2  -6  511.79   17.81
   6   2  -6  520.43   20.59
  -6   2   6  538.79   20.53
  -6  -2   6  525.69   20.32
  -6   2   5  759.64   26.70
   6   2  -5  736.05   22.58
   6   2  -5  778.50   26.16
  -6  -2   5  739.87   25.62
  -6   2   5  774.19   26.32
  -6   2   4    2.64    1.83
   6   2  -4    2.38    1.26
  -6   2   4    1.24    1.40
   6   2  -4    4.57    1.90
  -6  -2   4    3.87    1.62
  -6   2   3 1156.95   36.73
   6   2  -3 1217.58   35.18
  -6  -2   3 1170.76   34.79
  -6   2   2  194.40   11.39
   6   2  -2  186.12   10.07
  -6  -2   2  166.07    9.64
   6   2  -1 2391.30   59.95
  -6  -2   1 2320.51   59.87
   6   2   0  173.32    9.26
  -6  -2   0  179.92    9.46
  -6   2  -1  110.15    8.66
   6   2   1  105.66    6.72
   6   2   1   98.29    7.78
  -6  -2  -1   97.77    6.63
  -6  -2  -2    6.53    1.18
  -6   2  -2    5.69    2.28
   6   2   2    8.46    2.50
   6   2   2    5.54    1.64
  -6  -2  -2    4.08    1.65
  -6   2  -3  198.10   12.25
  -6  -2  -3  217.43    7.59
   6  -2   3  198.69    7.11
   6   2   3  213.61    9.66
   6   2   3  214.88   11.70
  -6  -2  -3  210.44    9.69
  -6  -2  -4  165.41    6.54
  -6   2  -4  156.38   10.86
   6  -2   4  168.11    5.61
   6   2   4  153.74    7.88
   6   2   4  161.52   10.00
  -6  -2  -4  166.38    8.26
  -6   2  -5 2694.94   72.51
  -6  -2  -5 2730.32   62.78
   6   2   5 2649.61   69.17
  -6  -2  -5 2711.50   64.78
  -6   2  -6   96.01    8.60
   6   2   6   94.40    7.65
  -6  -2  -6  109.49    6.05
   6   2   6  101.78    7.57
  -6   2  -7  302.88   16.08
   6   2   7  325.87   14.87
   6  -2   7  283.53   10.98
  -6  -2  -7  296.84   10.88
   6   2   7  259.75   13.13
  -6   2  -8   37.93    5.64
   6   2   8   30.29    4.18
   6   2   8   42.44    4.99
  -6  -2  -8   40.71    3.32
   6  -2   8   38.89    3.40
  -6   2  -9   25.60    5.12
   6   2   9   31.79    4.57
  -6  -2  -9   35.03    3.04
   6  -2   9   40.97    3.36
   6   2   9   43.76    4.93
  -6   2 -10  604.40   25.14
   6   2  10  623.24   22.73
   6  -2  10  579.87   17.50
  -6  -2 -10  606.45   16.96
   6   2  10  584.85   21.07
  -6   2 -11  312.19   17.21
  -6  -2 -11  319.46   10.31
   6  -2  11  326.85   11.03
   6   2  11  341.52   15.60
  -6   2 -12   41.86    6.29
   6  -2  12   37.17    2.98
  -6  -2 -12   38.29    2.70
   6   2  12   37.53    5.12
  -6   2 -13 1376.91   45.74
   6   2  13 1460.73   42.90
  -6  -2 -13 1447.54   34.38
   6  -2  13 1493.82   35.70
   6   2  14   36.33    5.14
  -6  -2 -14   32.95    2.11
   6  -2  14   36.46    2.79
  -6   2 -15 1328.02   41.39
   6   2  15 1333.16   37.81
  -6  -2 -15 1127.46   27.00
  -6  -2 -15 1148.23   26.95
   6  -2  15 1295.94   29.25
   6   2  16  223.54   12.48
  -6   2 -16  195.74   13.53
   6  -2  16  211.05    7.28
   6   2  17   35.09    5.05
  -6   2 -17   37.02    5.89
   6   2  18   69.46    6.91
  -6   2 -18   65.17    7.80
   6   2  19  189.30   11.96
  -6   2 -19  226.01   14.36
   6   2  20   10.56    3.51
  -6   2 -20   11.74    3.83
  -6   2 -21  873.86   32.62
  -6   2 -22   36.64    5.83
  -6   2 -23  170.31   12.38
  -6   2 -24   13.12    3.71
  -6   2 -25    7.72    2.86
   6   3 -23  111.20   12.03
   6  -3 -22   -1.20    2.94
   6   3 -22   -1.24    2.81
  -6  -3  22    2.16    2.83
   6  -3 -21  516.26   25.90
   6  -3 -21  538.10   25.78
   6   3 -21  543.92   27.05
  -6  -3  21  483.47   24.20
   6  -3 -20   16.95    4.69
   6   3 -20   25.15    5.98
   6  -3 -20   27.90    5.80
   6  -3 -19  121.77   11.54
   6   3 -19  130.72   12.38
   6  -3 -19  138.62   12.12
   6  -3 -18  213.64   15.20
   6  -3 -18  222.51   15.09
   6   3 -18  212.17   15.57
   6  -3 -17    5.87    3.26
   6  -3 -17    1.03    2.12
   6   3 -17    6.62    3.38
  -6  -3  17    4.64    2.58
   6  -3 -16   52.81    7.11
   6   3 -16   43.89    7.14
  -6  -3  16   53.50    7.19
   6  -3 -15 1036.97   36.61
   6   3 -15 1040.84   38.29
  -6   3  15 1016.26   31.08
  -6  -3  15 1006.28   35.73
   6  -3 -14  104.75    9.57
   6   3 -14   80.46    9.26
  -6   3  14   88.20    6.95
  -6  -3  14   86.52    8.63
   6  -3 -13  509.82   22.53
  -6   3  13  515.40   19.55
  -6  -3  13  509.76   22.53
   6  -3 -12    4.80    2.45
  -6   3  12    4.69    2.10
  -6  -3  12    2.45    2.13
   6  -3 -11  184.73   12.00
  -6  -3  11  166.37   11.58
  -6   3  11  189.37   10.85
   6  -3 -10   70.69    7.12
  -6   3  10   61.47    6.17
  -6  -3  10   60.77    6.92
   6  -3  -9  371.45   16.88
   6   3  -9  336.64   17.69
  -6   3   9  361.81   16.32
  -6  -3   9  338.93   16.97
   6   3  -8   45.90    4.48
   6  -3  -8   50.94    5.80
   6   3  -8   56.82    6.69
  -6  -3   8   36.96    5.41
  -6   3   8   55.16    5.87
   6   3  -7  579.06   19.02
   6  -3  -7  601.36   21.88
   6   3  -7  598.85   23.92
  -6   3   7  568.79   22.30
  -6  -3   7  562.89   22.72
  -6   3   6    3.43    2.10
   6   3  -6    0.70    1.02
   6  -3  -6    4.43    1.98
   6   3  -6    2.20    1.79
  -6  -3   6    0.68    2.00
   6   3  -5 2554.68   61.16
   6   3  -5 2552.43   68.06
  -6  -3   5 2515.61   67.26
  -6   3   5 2581.14   68.44
  -6   3   4  380.08   17.61
   6   3  -4  353.16   12.23
   6   3  -4  352.17   16.47
  -6  -3   4  371.35   16.65
  -6   3   3  261.72   14.37
   6   3  -3  252.48   13.41
  -6  -3   3  271.67   13.60
  -6   3   2   24.27    4.41
   6  -3  -2   30.31    3.43
   6   3  -2   19.75    3.55
  -6  -3   2   22.51    3.89
   6  -3  -1   73.93    5.14
  -6  -3   1   81.12    6.87
   6   3  -1   75.59    6.69
   6  -3   0  460.43   14.95
   6   3   0  432.20   17.76
  -6  -3   0  447.73   18.05
   6  -3   1 2914.79   68.63
  -6  -3  -1 2893.16   73.76
   6   3   1 2992.47   73.88
   6  -3   2    8.25    1.62
   6   3   2    6.24    2.15
  -6  -3  -2    5.85    2.09
  -6   3  -3  358.67   18.20
   6   3   3  315.92   14.06
  -6  -3  -3  354.09   14.90
   6  -3   3  344.74   10.54
  -6   3  -4  333.27   17.48
  -6  -3  -4  301.05   13.57
   6   3   5  584.98   23.94
  -6  -3  -5  621.17   21.17
   6   3   5  622.35   23.01
   6   3   6   13.00    3.25
   6   3   6   10.64    3.15
  -6  -3  -6   13.05    2.67
   6   3   7  549.85   22.61
  -6  -3  -7  520.56   18.50
   6   3   7  547.67   20.78
   6   3   8  340.45   17.09
  -6  -3  -8  368.12   14.21
   6   3   8  345.18   15.57
   6   3   9 1008.82   33.87
  -6  -3  -9  964.94   28.64
   6   3   9  991.21   31.15
   6   3  10   18.29    3.44
   6   3  10   20.66    4.32
  -6  -3 -10   15.27    2.64
   6   3  11  936.47   32.99
  -6  -3 -11  987.64   28.31
   6   3  11  990.97   30.59
   6   3  12    2.16    1.80
   6   3  12    7.79    2.88
  -6  -3 -12    4.69    1.70
   6   3  13   40.69    5.72
  -6  -3 -13   44.77    4.14
   6   3  13   45.40    4.89
   6   3  14  151.73   11.09
  -6  -3 -14  163.18    8.13
   6   3  14  153.87    9.12
   6   3  15   87.53    8.55
  -6  -3 -15  104.35    6.30
   6   3  16  145.11   10.93
  -6  -3 -16  156.47    7.72
   6   3  17 1199.48   39.84
  -6  -3 -17 1237.31   32.54
  -6   3 -18   85.16    9.50
   6   3  18   93.55    8.95
  -6  -3 -18   88.60    5.49
   6  -3  18   91.28    5.87
  -6   3 -19  391.76   21.51
   6   3  19  453.89   20.99
  -6  -3 -19  436.33   14.22
   6  -3  19  435.90   14.85
   6   3  20    5.06    2.59
  -6   3 -20    8.43    3.90
   6  -3  20    8.39    1.89
   6   3  21   13.54    4.08
  -6   3 -21   19.09    4.92
   6  -3  21   21.90    2.81
  -6   3 -22  118.92   11.41
   6   3  22   95.91    9.13
  -6   3 -23  464.94   23.54
  -6   3 -24   32.30    6.13
  -6   3 -25  225.64   15.82
   6  -4 -20  169.66   14.11
   6   4 -20  169.82   14.97
   6  -4 -19   95.43   10.58
   6   4 -19  114.91   11.94
   6  -4 -18   33.05    6.39
   6   4 -18   29.59    6.28
   6   4 -17  288.18   18.67
  -6   4  17  267.51   12.67
  -6  -4  17  252.89   16.40
   6  -4 -16  380.64   20.40
   6   4 -16  310.83   19.74
  -6   4  16  361.76   15.42
  -6  -4  16  348.09   19.20
  -6   4  15    7.00    2.42
   6  -4 -15   19.77    4.75
   6   4 -15   11.36    4.20
  -6  -4  15   10.62    3.57
   6  -4 -14  299.40   17.32
  -6  -4  14  280.30   16.84
  -6   4  14  315.87   14.69
   6  -4 -13   16.23    4.09
  -6   4  13   12.77    3.03
   6  -4 -12  566.57   24.06
  -6   4  12  520.84   23.00
  -6   4  12  526.13   21.27
  -6  -4  12  566.12   24.48
   6  -4 -11  518.43   22.47
  -6   4  11  505.99   22.42
  -6  -4  11  512.81   23.09
  -6   4  11  517.50   21.10
   6  -4 -10   33.96    5.29
  -6   4  10   35.22    4.97
  -6   4  10   31.45    5.13
  -6  -4  10   39.78    5.97
  -6   4   9  178.89   12.24
   6  -4  -9  178.13   11.60
   6   4  -9  164.56   12.55
  -6   4   9  174.04   11.40
  -6  -4   9  169.92   12.10
  -6   4   8    3.03    2.22
   6   4  -8    2.03    1.35
  -6   4   8    1.67    2.56
   6  -4  -8    2.75    1.80
   6   4  -8    0.91    2.07
  -6  -4   8    1.66    2.54
  -6   4   7   30.16    5.41
  -6   4   7   34.93    5.46
   6   4  -7   34.75    3.66
   6  -4  -7   42.07    5.33
   6   4  -7   24.76    5.02
  -6  -4   7   37.41    5.52
  -6   4   6  772.34   29.18
   6   4  -6  724.13   21.71
  -6   4   6  760.59   28.53
  -6  -4   6  804.71   28.90
   6   4  -6  761.36   29.20
   6  -4  -6  769.02   26.19
  -6   4   5  648.02   26.71
  -6   4   5  717.27   27.42
   6   4  -5  686.82   19.46
  -6  -4   5  677.25   26.31
   6   4  -5  690.19   27.18
   6  -4  -5  662.52   23.54
   6   4  -4  390.18   11.97
  -6   4   4  411.76   19.66
  -6   4   4  393.89   19.23
   6   4  -4  371.24   18.51
  -6  -4   4  387.38   18.32
   6  -4  -4  388.23   16.14
  -6   4   3  191.08   12.98
  -6   4   3  178.71   12.60
  -6  -4   3  166.19   11.50
   6   4  -3  204.69   12.79
  -6   4   2   37.31    5.91
   6   4  -2   44.81    5.92
  -6  -4   2   44.28    5.72
   6   4  -1  964.60   32.47
  -6  -4   1  950.71   32.10
   6  -4   0  803.91   23.89
   6   4   0  803.56   28.25
  -6  -4   0  752.17   27.62
   6  -4   1    4.99    1.51
   6   4   1    0.68    1.66
  -6  -4  -1    4.76    2.43
  -6  -4  -2  708.85   25.66
  -6  -4  -3   18.21    3.72
  -6  -4  -4  809.69   27.57
   6  -4   4  778.86   27.18
   6  -4   5  680.05   24.39
  -6  -4  -5  657.19   24.08
   6  -4   6   91.62    7.63
  -6  -4  -6  106.86    8.17
   6   4   7   39.33    6.01
   6  -4   7   37.18    4.86
  -6  -4  -7   39.06    4.89
   6   4   8  230.71   14.67
  -6  -4  -8  227.03   12.14
   6  -4   8  225.74   12.12
   6   4   8  214.51   12.45
   6   4   9   28.12    4.27
   6   4   9   36.93    5.86
   6  -4   9   31.36    4.46
  -6  -4  -9   33.75    4.66
   6   4  10  948.62   34.16
   6  -4  10  923.30   29.47
  -6  -4 -10  892.55   29.35
   6   4  10  927.42   30.15
   6   4  11  230.09   14.82
   6  -4  11  231.62   12.03
  -6  -4 -11  239.31   12.34
   6   4  11  234.51   12.46
   6   4  12   55.93    7.21
  -6  -4 -12   57.11    5.92
   6  -4  12   66.43    6.21
   6   4  12   65.93    6.39
   6   4  13  211.52   14.08
  -6  -4 -13  183.66   10.61
   6  -4  13  186.20   10.62
   6   4  13  213.09   11.37
   6   4  14   32.00    4.50
   6   4  14   32.45    5.65
  -6  -4 -14   33.36    4.42
   6  -4  14   21.68    3.76
   6   4  15  121.34   10.71
  -6  -4 -15  131.79    8.62
   6  -4  15  121.76    8.23
   6   4  15  113.46    7.86
  -6  -4 -16  334.96   10.90
   6   4  16  425.43   20.60
  -6  -4 -16  375.94   15.69
   6  -4  16  445.68   16.59
   6   4  16  402.44   15.46
   6   4  17   59.45    7.76
  -6  -4 -17   61.69    5.83
   6  -4  17   56.32    5.58
   6   4  18  269.98   16.43
   6  -4  18  252.07   12.28
   6   4  19  201.81   14.16
   6  -4  19  196.46   10.48
   6   4  20  171.61   13.20
   6  -4  20  179.27    9.87
   6  -4  21  262.84   12.24
  -6   5  19   -2.49    2.56
  -6   5  18  300.58   13.75
   6  -5 -17    1.15    2.61
  -6   5  17    2.33    1.94
   6  -5 -16  310.60   19.12
   6   5 -16  315.40   20.45
  -6   5  16  326.61   15.30
  -6   5  15    1.31    2.10
   6  -5 -15    2.12    2.60
   6   5 -15   -1.26    3.09
  -6  -5  15   -1.06    2.78
   6  -5 -14   22.36    4.89
  -6   5  14   17.87    3.78
  -6  -5  14   13.55    4.43
   6  -5 -13   86.43    9.25
  -6  -5  13   81.94    9.36
  -6   5  13   91.34    8.24
   6  -5 -12  232.48   14.72
  -6   5  12  205.47   13.86
  -6   5  12  203.21   12.64
  -6  -5  12  221.62   15.08
   6  -5 -11   53.75    7.06
  -6   5  11   77.62    8.45
  -6   5  11   72.28    7.60
  -6  -5  11   68.33    8.21
  -6   5  10 1005.74   36.19
  -6   5  10 1076.09   35.56
   6  -5 -10 1010.96   35.48
   6   5 -10  982.10   38.43
  -6  -5  10 1022.29   37.10
  -6   5   9   16.66    4.23
  -6   5   9   15.30    4.09
   6  -5  -9   17.77    4.23
   6   5  -9   11.90    4.01
  -6  -5   9   15.38    4.45
  -6   5   8  293.04   16.26
  -6   5   8  276.62   16.42
   6  -5  -8  277.97   15.24
   6   5  -8  277.41   17.26
  -6  -5   8  282.54   16.80
  -6   5   7    3.53    2.71
   6   5  -7    3.65    1.44
  -6   5   7    4.59    2.94
   6  -5  -7    4.42    2.46
   6   5  -7    6.07    3.10
  -6  -5   7    3.72    2.43
  -6   5   6   51.70    6.93
   6   5  -6   51.43    3.86
  -6   5   6   67.98    7.63
   6  -5  -6   58.46    6.42
   6   5  -6   67.64    8.44
  -6  -5   6   57.44    7.25
  -6   5   5    6.45    2.95
   6   5  -5    1.65    0.90
  -6   5   5    3.74    2.60
   6  -5  -5    5.34    2.61
   6   5  -5    2.86    2.49
  -6  -5   5    2.69    2.03
  -6   5   4  555.80   24.41
  -6   5   4  542.18   24.23
   6  -5  -4  480.63   19.93
  -6  -5   4  536.23   23.43
   6   5  -4  523.62   23.86
  -6   5   3   12.40    3.75
   6  -5  -3   16.83    3.44
   6   5  -3   12.65    3.55
  -6  -5   3   11.30    3.60
  -6   5   2  603.48   26.11
   6  -5  -2  571.14   21.23
  -6  -5   2  594.11   24.79
   6  -5  -1   30.68    4.11
  -6  -5   1   27.75    4.95
  -6  -5   0  579.84   24.26
   6   5   0  564.51   26.10
  -6  -5  -1   22.84    4.54
   6   5   1   13.55    4.21
  -6  -5  -2  221.10   13.81
   6  -5   2  222.73   13.78
   6   5   2  242.08   15.98
   6  -5   3    4.01    2.23
  -6  -5  -3   15.14    3.83
   6   5   3   12.38    4.05
   6  -5   4  533.55   22.57
  -6  -5  -4  528.62   22.35
   6   5   4  496.37   24.28
   6  -5   5    5.50    2.99
  -6  -5  -5    2.34    1.91
   6  -5   6 1148.94   37.95
  -6  -5  -6 1178.26   38.12
   6  -5   7    2.31    2.66
  -6  -5  -7    4.60    2.74
  -6  -5  -8  176.80   11.81
   6  -5   8  165.68   11.41
   6  -5   9    0.74    1.67
  -6  -5  -9   -0.75    2.20
   6   5  10   14.44    3.38
  -6  -5 -10   12.66    3.39
   6  -5  10   16.75    3.76
   6   5  10   18.74    4.62
   6   5  11    5.96    2.60
   6   5  11    5.24    3.21
   6  -5  11    6.50    2.76
   6   5  12  807.36   32.78
  -6  -5 -12  849.01   29.35
   6  -5  12  821.22   28.86
   6   5  12  775.79   27.39
   6   5  13  117.91   11.13
  -6  -5 -13  102.93    8.76
   6  -5  13   90.74    8.14
   6   5  13   96.85    7.92
   6   5  14  387.98   21.17
  -6  -5 -14  393.06   18.08
   6  -5  14  367.28   17.27
   6   5  14  395.45   16.81
   6   5  15    2.24    2.00
   6   5  15   -2.12    2.19
  -6  -5 -15   -1.40    1.94
   6  -5  15    0.68    2.07
   6  -5  16  286.74   14.62
   6   5  16  274.07   12.88
   6   5  17   -0.47    1.58
   6  -5  17    1.99    1.84
   6  -5  18  179.30   11.21
   6  -5  19   56.40    6.20
  -6   6  17  125.44    9.28
  -6   6  16  313.14   15.63
  -6   6  15   50.24    6.22
  -6   6  14   61.75    7.10
   6  -6 -13   38.81    6.69
  -6   6  13   33.59    5.43
   6  -6 -12  334.88   19.05
  -6   6  12  314.48   18.03
  -6   6  12  345.79   17.89
  -6   6  11   49.30    7.03
  -6   6  11   49.65    6.62
   6  -6 -11   48.43    7.18
  -6   6  10   14.39    3.99
  -6   6  10   10.47    4.04
   6  -6 -10   10.28    3.46
  -6   6   9   85.47    9.15
  -6   6   9   85.78    9.22
   6   6  -9   87.28   10.29
   6  -6  -9   84.06    8.75
   6   6  -8  126.24    6.84
  -6   6   8   99.90    9.99
  -6   6   8  128.76   11.27
   6   6  -8  115.55   11.71
   6  -6  -8  130.39   10.82
   6   6  -7   81.30    5.01
  -6   6   7   70.92    8.57
  -6   6   7   79.21    9.09
   6   6  -7   76.19    9.44
  -6  -6   7  107.87   10.61
   6  -6  -7   83.03    8.56
   6   6  -6  497.86   14.30
  -6   6   6  533.69   24.67
  -6   6   6  476.04   23.52
   6  -6  -6  547.52   22.87
  -6  -6   6  562.77   25.53
   6  -6  -5    8.50    3.12
  -6   6   5   14.18    4.40
  -6  -6   5   16.37    4.54
  -6   6   4   48.39    7.26
  -6  -6   4   49.61    7.26
  -6   6   3  123.29   11.44
   6   6  -3  132.42   12.61
  -6  -6   3  160.23   12.66
   6   6  -2   37.68    7.09
  -6   6   2   33.76    6.28
  -6  -6   2   30.66    5.68
  -6   6   1  459.47   23.28
  -6  -6   1  461.91   22.69
   6  -6  -1  470.28   22.95
   6   6  -1  478.57   24.79
  -6  -6   0  647.44   27.27
   6  -6   0  608.51   26.94
   6   6   0  634.46   29.42
  -6  -6  -1   25.79    5.25
   6  -6   1   29.20    5.71
   6   6   1   23.22    5.60
  -6  -6  -2  121.57   10.82
   6  -6   2   94.24    9.93
   6   6   2   86.57   10.18
   6  -6   3   23.87    4.94
  -6  -6  -3   21.69    4.88
   6   6   3   21.95    5.36
  -6  -6  -4  176.54   12.81
   6   6   4  158.78   13.51
   6  -6   5  112.90   10.43
  -6  -6  -5  107.16   10.08
   6   6   5   98.68   10.81
  -6  -6  -6  133.10   11.31
   6  -6   6  144.04   11.74
   6   6   6  121.62   12.02
  -6  -6  -7  128.70   11.15
   6  -6   7  126.42   10.98
  -6  -6  -8  309.97   17.81
   6  -6   8  343.52   18.41
  -6  -6  -9   15.39    4.02
   6  -6   9    9.72    3.66
   6  -6  10  485.11   22.61
  -6  -6 -10  547.49   23.76
   6  -6  11   72.79    8.15
  -6  -6 -11   69.54    8.01
   6   6  12    3.50    2.42
  -6  -6 -12    7.08    3.17
  -6  -6 -13  149.40   12.01
   6  -6  13  150.10   11.63
   6   6  13  154.44   10.50
   6  -6  14   35.77    5.80
   6  -6  15  167.36   12.09
   6  -6  16  101.59    9.29
  -6   7  13  373.68   19.32
  -6   7  12    0.92    2.70
  -6   7  11   20.04    5.01
  -6   7  10   11.85    4.09
  -6   7   9   38.89    6.67
  -6   7   8   10.57    3.91
   7   0 -26    0.68    1.97
   7   0 -25  650.41   29.68
   7   0 -25  630.03   23.99
   7   0 -24   -1.17    3.05
   7   0 -24    0.69    1.81
   7   0 -24   -2.32    2.83
   7   0 -23  726.81   31.04
   7   0 -23  653.21   25.22
   7   0 -23  731.34   31.21
   7   0 -22    2.18    2.66
   7   0 -22    0.71    2.07
   7   0 -22   -1.11    2.51
   7   0 -21   35.74    6.43
   7   0 -21   40.14    5.49
   7   0 -21   44.45    7.27
   7   0 -20    1.02    2.30
   7   0 -20    0.73    1.64
   7   0 -20   -1.06    2.77
   7   0 -19   35.36    6.06
   7   0 -19   27.91    4.71
   7   0 -19   43.28    6.84
   7   0 -18    0.95    2.33
   7   0 -18   -0.74    2.17
   7   0 -18   -1.00    2.27
   7   0 -17 2026.78   60.45
   7   0 -17 1965.54   57.40
   7   0 -16    2.66    2.46
   7   0 -16   -1.50    1.84
   7   0 -15   85.44    8.42
   7   0 -15   76.38    7.59
   7   0 -14    2.47    2.15
   7   0 -14   -0.75    1.39
   7   0 -13    9.48    3.01
   7   0 -13    7.49    2.94
   7   0 -12    0.76    2.23
   7   0 -12    0.74    2.06
   7   0 -11  941.05   31.83
   7   0 -11  926.15   31.79
   7   0 -11  892.41   32.05
   7   0 -10   -0.70    1.72
   7   0 -10   -0.73    1.91
   7   0 -10    0.76    2.10
   7   0  -9 3306.68   84.11
   7   0  -9 3365.10   85.09
   7   0  -9 3215.43   84.49
   7   0  -8    0.65    1.58
   7   0  -8    1.43    2.09
   7   0  -8   -0.69    1.44
   7   0  -7  773.17   28.36
   7   0  -7  845.33   28.37
  -7   0   6    0.54    1.21
   7   0  -6   -0.70    1.70
   7   0  -6   -0.62    1.41
  -7   0   5  390.65   15.99
   7   0  -5  365.36   17.21
   7   0  -5  375.18   16.20
  -7   0   4    1.05    1.38
   7   0  -4   -0.68    1.08
   7   0  -4    0.55    1.34
  -7   0   3 1688.98   46.10
   7   0  -3 1726.02   48.61
   7   0  -3 1649.56   45.62
   7   0  -2   -0.67    1.38
  -7   0   2    0.52    1.53
   7   0  -2    0.47    1.16
  -7   0   1 1685.86   45.55
   7   0  -1 1700.11   47.66
   7   0  -1 1598.36   43.68
  -7   0   0    0.52    1.68
  -7   0   0    2.00    1.95
   7   0   0    0.39    0.89
  -7   0  -1  786.47   26.73
   7   0   1  691.44   21.71
  -7   0  -2    0.68    1.53
   7   0   2    0.62    0.71
  -7   0  -3   36.36    4.96
   7   0   3   46.39    3.51
   7   0   4   -0.66    1.50
  -7   0  -4    0.69    1.57
   7   0   4    0.91    0.66
   7   0   5 1816.91   49.57
   7   0   5 1712.30   40.64
  -7   0  -5 1656.43   49.39
   7   0   6    1.32    1.72
  -7   0  -6    1.43    1.87
   7   0   6    0.25    0.52
   7   0   7 2769.09   67.56
  -7   0  -7 2818.47   73.94
   7   0   8    0.37    1.24
  -7   0  -8    2.20    1.92
   7   0   9  614.54   19.58
  -7   0  -9  651.62   24.92
   7   0  10   -0.36    1.05
  -7   0 -10   -0.75    1.39
   7   0  11  391.72   14.06
  -7   0 -11  382.48   18.35
   7   0  12    2.13    1.31
  -7   0 -12    0.77    1.59
   7   0  13 1229.23   33.20
  -7   0 -13 1238.18   39.55
   7   0  14    0.36    1.34
  -7   0 -14    0.77    2.36
   7   0  15  511.49   17.05
  -7   0 -15  506.68   21.92
  -7   0 -16    0.76    1.86
  -7   0 -17  349.27   17.26
  -7   0 -18   -0.75    1.70
  -7   0 -19  425.61   19.11
  -7   0 -20   -0.73    1.79
  -7   0 -21  292.55   15.25
  -7   0 -22   -1.43    2.19
  -7   0 -23  362.04   17.06
   7   1 -26   88.40    8.43
   7  -1 -25    2.61    2.41
   7   1 -25    0.77    2.14
   7  -1 -25    1.16    2.40
   7   1 -25    3.69    3.22
   7   1 -24    9.05    3.92
   7  -1 -24    9.81    2.78
   7   1 -24    7.08    2.91
   7  -1 -24   11.42    4.22
   7   1 -24   14.52    4.75
   7   1 -23  164.40   13.53
   7  -1 -23  196.91   11.65
   7  -1 -23  218.45   16.05
   7   1 -23  200.05   15.47
   7   1 -23  186.61   12.27
   7  -1 -23  191.20   14.90
   7   1 -22   60.61    8.40
   7  -1 -22   53.02    6.16
   7  -1 -22   66.67    8.91
   7   1 -22   55.32    6.90
   7  -1 -22   60.21    8.31
   7   1 -22   55.69    8.12
   7  -1 -21  778.60   27.56
   7   1 -21  767.67   31.46
   7   1 -21  801.25   33.29
   7   1 -21  787.13   29.30
   7  -1 -21  848.56   33.47
   7   1 -20  499.92   23.44
   7  -1 -20  494.49   20.39
   7   1 -20  450.24   23.75
   7  -1 -20  511.66   24.57
   7   1 -20  505.35   21.97
   7   1 -19  138.93   11.29
   7  -1 -19  118.17    9.00
   7   1 -19  141.69   12.20
   7  -1 -19  124.93   11.20
   7   1 -19  113.32    9.64
   7  -1 -18  174.10   11.05
   7   1 -18  169.98   12.41
   7  -1 -18  181.89   13.37
   7   1 -18  152.25   11.35
   7   1 -18  170.32   13.35
   7  -1 -17  178.64   11.36
   7   1 -17  200.78   13.23
   7   1 -17  160.65   11.63
   7  -1 -17  198.61   13.87
   7   1 -17  176.39   13.42
   7  -1 -16  665.41   25.15
   7   1 -16  714.68   27.39
   7   1 -16  701.52   27.02
   7  -1 -16  619.09   27.56
   7  -1 -15  302.10   15.41
   7   1 -15  315.14   16.57
   7   1 -15  301.60   16.35
   7   1 -14   89.61    8.20
   7  -1 -14   97.76    8.25
   7   1 -14   96.29    8.87
   7  -1 -13  279.68   14.73
   7   1 -13  304.51   15.64
   7   1 -13  280.78   15.59
   7  -1 -12    1.42    2.18
   7   1 -12   -0.80    1.65
   7   1 -12   -0.70    1.45
   7  -1 -11 1446.27   42.97
   7   1 -11 1398.55   42.11
   7   1 -11 1382.77   43.68
   7   1 -11 1504.81   45.00
   7  -1 -11 1332.98   43.77
   7   1 -10  884.64   29.45
   7  -1 -10  884.48   30.40
   7   1 -10  853.36   31.01
   7  -1 -10  886.26   31.43
   7   1 -10  894.23   31.56
   7   1  -9  742.68   25.04
  -7   1   9  660.87   24.62
   7  -1  -9  699.85   25.77
   7   1  -9  657.78   25.70
   7   1  -9  680.99   26.32
   7  -1  -9  691.55   26.37
   7   1  -8  133.15    8.82
  -7   1   8  118.58    8.93
   7  -1  -8  103.44    8.62
   7   1  -8  141.06   10.23
   7   1  -8  127.06    9.49
   7  -1  -8  125.75    9.57
   7  -1  -7  196.27   12.00
  -7   1   7  208.11   11.82
   7   1  -7  194.86   11.70
  -7   1   7  180.82   11.18
   7   1  -7  203.58   12.47
   7  -1  -6  257.44   14.12
  -7   1   6  263.23   13.66
   7   1  -6  267.75   13.75
  -7   1   6  272.32   13.89
   7   1  -6  271.84   14.66
  -7   1   5 2289.64   60.38
   7  -1  -5 2260.32   61.10
   7   1  -5 2332.42   59.98
   7   1  -5 2321.72   62.12
   7  -1  -4  631.30   24.54
  -7   1   4  648.87   23.91
   7   1  -4  656.27   23.04
   7   1  -4  682.86   25.20
  -7   1   3  495.20   20.33
  -7  -1   3  505.76   17.97
   7  -1  -3  562.41   22.08
   7   1  -3  534.01   19.51
   7   1  -3  555.08   21.81
  -7  -1   2  356.76   13.85
  -7   1   2  353.16   16.08
   7  -1  -2  368.55   17.07
   7   1  -2  316.46   14.02
   7   1  -2  363.96   16.83
  -7   1   1    3.16    1.85
   7  -1  -1    1.38    1.56
  -7  -1   1    0.81    1.18
  -7   1   1    1.36    1.41
   7   1  -1    1.33    1.23
  -7  -1   0  860.08   25.49
   7   1   0  826.41   25.15
  -7   1   0  856.72   29.48
  -7  -1  -1 1770.57   47.06
   7   1   1 1857.40   46.53
  -7   1  -1 1871.84   52.18
  -7  -1  -2   23.34    3.16
  -7   1  -2   24.96    4.25
   7   1   2   25.59    4.19
   7   1   2   23.09    2.79
  -7  -1  -3 1158.74   32.69
   7   1   3 1198.92   31.09
  -7   1  -3 1181.38   37.43
   7   1   3 1120.71   35.97
   7   1   4  184.80    7.64
   7   1   4  181.38   10.98
  -7   1  -4  162.88   11.28
   7   1   5  330.06   10.80
  -7   1  -5  332.53   16.73
   7   1   5  334.53   15.64
   7   1   6  492.91   13.93
  -7   1  -6  495.37   21.57
   7  -1   6  525.43   14.97
   7   1   6  492.78   20.12
   7  -1   7  204.36    7.68
   7   1   7  204.15   10.82
   7   1   7  198.58   11.59
   7  -1   7  198.16    7.05
  -7   1  -7  197.02   12.65
   7   1   8  460.02   18.71
   7  -1   8  449.95   12.88
   7   1   8  438.20   17.10
   7  -1   8  426.91   11.45
  -7   1  -8  480.20   20.98
   7  -1   8  416.93   11.37
   7   1   9  166.06    9.52
   7  -1   9  167.81    6.24
   7   1   9  162.85   10.39
  -7   1  -9  137.89   10.85
   7  -1  10    3.20    0.93
   7   1  10    2.59    1.73
   7   1  10    4.43    2.19
  -7   1 -10    4.10    2.74
   7   1  11 2460.96   62.87
   7  -1  11 2456.76   56.03
  -7   1 -11 2473.67   68.43
   7   1  12   94.57    7.11
  -7   1 -12  102.39    9.16
   7   1  13   37.55    4.54
  -7   1 -13   34.87    5.50
   7   1  14  625.28   21.68
  -7   1 -14  596.89   25.27
   7   1  15   23.69    3.65
  -7   1 -15   26.49    5.02
   7   1  16  173.97    9.93
  -7   1 -16  185.32   12.54
   7   1  17  459.51   18.09
  -7   1 -17  485.79   21.84
   7   1  18   51.98    5.46
  -7   1 -18   48.34    6.60
  -7   1 -19  163.52   11.90
  -7   1 -20   10.86    3.28
  -7   1 -21   66.18    7.43
  -7   1 -22  445.03   20.48
  -7   1 -23  177.16   12.23
  -7   1 -24   69.96    7.57
   7   2 -27   30.42    5.40
   7   2 -26   29.19    5.50
   7   2 -24    4.40    3.21
   7  -2 -24   11.50    4.25
   7   2 -23  104.66   10.70
   7   2 -23   87.97   10.53
   7  -2 -23  111.12   11.05
   7  -2 -22  374.56   22.13
   7   2 -22  398.45   20.99
   7   2 -22  371.27   21.95
   7  -2 -22  388.11   21.61
   7  -2 -21    1.18    2.88
   7   2 -21    0.98    2.21
   7   2 -21   -1.19    2.69
   7  -2 -21    1.11    2.89
   7  -2 -20  539.64   26.63
   7   2 -20  565.56   25.06
   7   2 -20  547.22   26.93
   7  -2 -20  626.24   27.47
   7   2 -19  102.81    9.64
   7  -2 -19  126.45   11.68
   7   2 -19  130.74   12.10
   7  -2 -19  111.72   11.07
   7  -2 -18   53.68    7.56
   7   2 -18   45.03    6.39
   7   2 -18   43.32    7.12
   7  -2 -18   59.43    7.98
   7   2 -17  214.66   13.58
   7  -2 -17  188.29   14.17
   7   2 -17  234.14   15.98
   7  -2 -16  326.87   18.44
   7   2 -16  276.40   15.55
   7   2 -15  456.67   20.32
   7  -2 -15  439.98   22.05
  -7  -2  15  453.82   21.71
   7   2 -14 1050.21   34.70
   7  -2 -14 1024.37   37.42
  -7  -2  14 1090.13   37.42
   7   2 -13   18.65    3.81
  -7  -2  13   29.18    5.04
   7   2 -12 2151.94   58.90
  -7  -2  12 2177.38   61.89
  -7   2  11   10.84    2.89
   7   2 -11    6.19    2.43
  -7   2  11    8.98    2.86
   7   2 -11    9.56    3.11
  -7  -2  11    8.00    3.31
  -7   2  10  364.20   17.59
   7   2 -10  384.74   16.42
   7   2 -10  363.34   18.35
  -7   2  10  363.75   16.62
  -7  -2  10  360.77   17.79
  -7   2   9  112.21    9.15
   7   2  -9  118.42    8.22
   7   2  -9  121.18    9.81
  -7  -2   9  117.74    9.41
  -7   2   9  130.92    9.36
  -7   2   8  264.74   14.49
   7   2  -8  279.36   15.02
  -7  -2   8  268.54   14.41
  -7   2   8  258.68   13.81
  -7   2   7   46.23    5.70
  -7   2   7   32.62    4.78
   7   2  -7   40.97    5.42
  -7  -2   7   43.87    5.59
   7   2  -6 1544.29   42.11
  -7   2   6 1564.45   46.80
   7   2  -6 1603.61   46.17
  -7  -2   6 1567.30   45.52
  -7   2   6 1590.03   46.27
  -7   2   5  143.10   10.35
   7   2  -5  134.44    9.44
  -7   2   5  152.11   10.38
  -7  -2   5  125.79    9.10
  -7   2   4  995.33   34.08
   7   2  -4 1053.15   32.92
  -7  -2   4 1032.01   32.65
  -7   2   4 1070.43   34.30
  -7   2   3  648.58   24.80
   7   2  -3  622.87   22.56
  -7  -2   3  621.73   22.64
  -7   2   2   30.20    4.80
   7   2  -2   27.50    3.95
  -7  -2   2   29.81    4.13
   7   2  -1  137.51    8.49
  -7  -2   1  124.63    8.41
   7   2   0  347.09   14.45
   7   2   0  341.34   16.67
  -7  -2   0  352.77   14.71
   7   2   1   78.60    5.98
   7   2   1   74.02    7.26
  -7   2  -1   78.69    7.62
  -7  -2  -1   71.49    5.90
  -7  -2  -2 2501.37   58.86
   7   2   2 2468.60   62.15
   7   2   2 2606.72   67.22
  -7   2  -2 2523.91   68.61
  -7  -2  -2 2430.78   62.27
  -7   2  -3   11.25    3.57
  -7  -2  -3   11.02    1.80
   7   2   3    9.57    2.90
   7   2   3    9.19    2.26
  -7  -2  -3   10.90    2.46
  -7  -2  -4  609.74   17.80
   7   2   4  631.44   19.46
  -7  -2  -4  608.93   19.75
  -7   2  -4  559.03   24.37
   7   2   4  612.28   23.34
  -7  -2  -5  249.67    9.42
   7  -2   5  241.46    7.16
   7   2   5  229.94    9.90
  -7  -2  -5  248.16   10.40
  -7   2  -5  258.95   15.07
   7   2   5  232.63   12.95
   7   2   6  399.75   17.98
   7   2   6  420.64   18.24
  -7   2  -6  431.30   20.48
  -7  -2  -6  413.20   14.24
   7   2   7  924.76   31.29
   7  -2   7  898.89   26.06
   7   2   7  962.69   31.37
  -7   2  -7  977.08   34.62
  -7  -2  -7  997.74   26.19
   7   2   8  640.38   23.85
   7  -2   8  621.51   18.68
  -7   2  -8  625.79   26.33
  -7  -2  -8  612.68   18.05
   7   2   8  640.81   23.45
  -7   2  -9   55.47    7.33
   7   2   9   74.06    6.99
   7  -2   9   68.10    4.37
   7   2   9   68.00    6.62
  -7  -2  -9   74.23    4.23
  -7   2 -10 1559.37   50.57
   7   2  10 1613.64   47.16
   7  -2  10 1685.80   40.06
   7   2  10 1704.73   46.97
  -7  -2 -10 1606.95   38.99
  -7   2 -11   25.37    5.32
   7   2  11   29.19    4.45
   7   2  11   32.58    4.84
   7  -2  11   32.21    2.73
  -7  -2 -11   29.02    2.17
  -7   2 -12  405.92   20.98
   7   2  12  441.49   18.21
   7   2  12  430.79   18.75
   7  -2  12  447.69   12.70
   7   2  13   96.70    8.06
  -7   2 -13  102.76    9.79
   7   2  13   98.99    7.67
   7  -2  13   97.49    4.13
   7   2  14   41.23    5.47
  -7   2 -14   41.58    6.49
   7  -2  14   36.61    2.05
   7   2  15   81.44    7.47
  -7   2 -15   84.61    9.25
   7   2  16  494.51   20.40
  -7   2 -16  487.45   23.27
   7   2  17    6.18    2.77
  -7   2 -17    8.81    3.26
   7   2  18  898.84   30.71
  -7   2 -18  892.14   34.14
   7   2  19  100.22    8.62
  -7   2 -19   97.13    9.82
   7   2  20  339.27   16.46
  -7   2 -20  315.82   18.13
   7   2  21   45.16    5.92
  -7   2 -21   37.16    6.10
  -7   2 -22    9.42    3.60
  -7   2 -23   31.61    5.61
  -7   2 -24  323.85   17.99
   7  -3 -21   81.07   10.06
   7   3 -21   77.03   10.08
   7  -3 -21   93.55   10.61
   7  -3 -20  203.72   15.62
   7  -3 -20  211.12   15.50
   7   3 -20  170.36   14.79
   7  -3 -19   33.46    6.35
   7   3 -19   30.76    6.67
  -7  -3  19   40.05    6.86
   7  -3 -18  306.45   18.52
   7   3 -18  314.87   19.65
  -7  -3  18  289.06   17.75
   7   3 -17   10.50    3.18
   7  -3 -17   16.06    4.55
   7   3 -17   13.92    4.92
  -7  -3  17   11.94    4.02
   7  -3 -16 1299.54   42.76
   7   3 -16 1232.20   39.36
  -7  -3  16 1156.78   41.32
   7  -3 -15   94.05    9.34
   7   3 -15   98.21    8.50
  -7  -3  15   97.76    9.50
   7  -3 -14    8.06    3.21
  -7   3  14    5.71    2.28
   7   3 -14    8.36    2.66
  -7  -3  14    3.66    2.93
   7  -3 -13   36.10    5.78
   7   3 -13   37.06    5.14
  -7   3  13   35.91    4.96
  -7  -3  13   32.07    5.63
   7   3 -12  193.91   11.21
   7  -3 -12  174.76   12.18
   7   3 -12  154.75   12.51
  -7  -3  12  179.12   12.56
  -7   3  12  175.81   11.07
   7   3 -11  138.97    9.20
   7  -3 -11  155.00   11.18
   7   3 -11  140.53   11.75
  -7   3  11  138.32    9.91
  -7  -3  11  134.86   10.74
   7   3 -10 2216.75   57.66
   7  -3 -10 2190.94   60.93
   7   3 -10 2153.86   63.46
  -7   3  10 2252.53   60.56
  -7  -3  10 2138.62   61.75
   7  -3  -9  139.78   10.14
   7   3  -9  167.60   12.24
  -7   3   9  147.52   10.41
  -7  -3   9  141.40   10.66
   7  -3  -8 1382.81   41.02
   7   3  -8 1284.18   42.90
  -7   3   8 1383.46   42.18
  -7  -3   8 1379.71   42.60
   7   3  -7  259.84   11.44
   7  -3  -7  271.42   13.46
   7   3  -7  275.25   15.21
  -7   3   7  245.73   14.10
  -7  -3   7  260.52   14.37
   7   3  -6  595.49   19.74
  -7   3   6  631.54   25.46
   7  -3  -6  623.62   22.31
   7   3  -6  586.69   24.24
  -7  -3   6  634.72   24.31
  -7   3   6  624.52   24.56
  -7   3   5  392.88   19.46
   7   3  -5  406.63   14.58
   7  -3  -5  445.78   17.27
   7   3  -5  446.45   19.47
  -7   3   5  416.28   19.35
  -7  -3   5  408.81   18.51
  -7   3   4  913.73   33.45
   7   3  -4  923.87   31.91
  -7  -3   4 1018.42   32.47
  -7   3   4  974.26   33.54
  -7   3   3  148.84   11.16
   7   3  -3  149.98   10.14
  -7   3   3  153.42   11.22
  -7  -3   3  150.62   10.07
  -7   3   2  439.99   20.90
   7   3  -2  461.65   19.37
  -7   3   2  493.14   21.85
  -7  -3   2  468.23   19.36
   7  -3  -1    3.32    1.64
   7   3  -1    0.63    1.64
  -7  -3   1    2.47    1.98
   7  -3   0 2275.63   55.95
   7   3   0 2365.07   61.11
  -7  -3   0 2282.84   60.79
   7  -3   1    0.87    0.89
   7   3   1    5.18    2.19
  -7  -3  -1    2.88    1.76
   7  -3   2  145.71    6.51
   7   3   2  139.59    8.96
  -7  -3  -2  147.58    9.25
   7   3   2  166.69   11.19
  -7   3  -3  181.68   12.76
   7  -3   3  154.15    6.17
   7   3   3  154.14    9.13
  -7  -3  -3  177.12    9.97
   7   3   3  156.07   10.85
  -7   3  -4  255.11   15.89
   7  -3   4  235.78    7.23
  -7  -3  -4  272.44   12.48
   7   3   4  282.74   14.64
  -7   3  -5   29.46    5.66
   7   3   5   31.41    5.03
   7   3   5   26.11    4.82
  -7  -3  -5   37.29    4.46
  -7   3  -6 2006.58   58.89
   7   3   6 1910.68   55.66
  -7  -3  -6 1882.22   50.16
   7   3   6 1907.14   54.07
   7   3   7   18.55    4.30
  -7   3  -7   15.81    4.39
   7   3   7   15.20    3.46
  -7  -3  -7   18.67    2.97
  -7   3  -8  231.99   15.36
   7   3   8  215.10   13.42
  -7  -3  -8  207.05   10.10
   7   3   8  203.80   12.20
  -7   3  -9  243.85   16.00
   7   3   9  244.27   14.39
  -7  -3  -9  230.08   10.69
   7   3   9  250.06   13.43
  -7   3 -10   25.92    5.29
   7   3  10   30.09    4.65
   7   3  10   28.21    5.20
  -7  -3 -10   32.61    3.63
  -7   3 -11  263.30   17.19
  -7  -3 -11  274.37   11.50
   7   3  11  294.30   14.38
  -7   3 -12 1099.56   41.41
   7   3  12 1182.51   38.99
  -7  -3 -12 1234.31   32.22
   7   3  12 1159.90   36.06
   7   3  13   27.48    4.40
  -7   3 -13   17.21    4.69
   7   3  13   27.74    4.97
   7  -3  13   21.16    2.95
  -7  -3 -13   21.73    2.91
   7   3  14  713.10   24.95
  -7   3 -14  701.02   30.44
   7   3  14  712.14   27.77
  -7  -3 -14  734.84   20.85
   7  -3  14  721.94   21.56
   7   3  15    3.29    2.95
   7   3  15    9.18    2.86
  -7   3 -15    7.67    3.65
   7  -3  15    5.24    1.74
  -7  -3 -15    4.25    1.48
  -7   3 -16  745.35   31.72
   7   3  16  746.49   24.91
   7   3  16  725.13   28.23
  -7  -3 -16  736.81   20.04
   7  -3  16  742.60   21.36
  -7   3 -17   34.22    6.48
   7   3  17   23.24    4.71
  -7  -3 -17   32.85    2.61
   7  -3  17   26.63    2.90
   7   3  18  247.93   14.80
  -7   3 -18  220.59   15.98
   7  -3  18  242.51    9.12
   7   3  19   22.88    4.91
  -7   3 -19   25.58    5.74
   7  -3  19   19.72    2.40
  -7   3 -20  130.13   12.17
   7   3  20  128.02   10.71
  -7   3 -21   23.32    5.73
   7   3  21   20.59    4.51
  -7   3 -22  661.68   29.32
   7   3  22  625.58   26.34
  -7   3 -23   16.49    4.99
   7  -4 -19   72.41    9.34
   7   4 -19   80.65   10.35
   7  -4 -18   38.97    6.73
   7   4 -18   46.40    7.86
   7  -4 -17  515.30   25.23
  -7   4  17  554.53   20.93
  -7  -4  17  534.82   25.39
   7  -4 -16   30.21    6.20
  -7   4  16   28.07    4.53
  -7  -4  16   30.92    5.75
   7  -4 -15  194.90   14.11
  -7   4  15  187.31   11.42
  -7  -4  15  166.94   13.28
   7  -4 -14  263.06   16.15
   7   4 -14  265.33   14.00
  -7   4  14  263.05   14.00
  -7  -4  14  242.20   16.05
   7  -4 -13   23.81    5.10
  -7   4  13   22.50    4.81
   7   4 -13   26.71    4.31
  -7   4  13   28.04    4.59
  -7  -4  13   23.31    5.10
   7   4 -12  195.67   11.25
  -7   4  12  193.27   13.34
   7  -4 -12  199.64   13.33
   7   4 -12  189.94   14.38
  -7   4  12  220.51   12.98
  -7  -4  12  205.40   14.15
   7   4 -11  249.40   12.47
  -7   4  11  232.48   14.91
   7  -4 -11  233.38   14.37
   7   4 -11  257.21   16.63
  -7   4  11  268.56   14.60
  -7  -4  11  238.67   15.21
   7   4 -10    8.70    2.59
  -7   4  10    3.60    2.20
  -7   4  10   14.10    3.69
   7  -4 -10    7.84    2.99
   7   4 -10    2.02    2.65
  -7  -4  10    9.98    3.56
  -7   4   9  900.92   33.03
   7  -4  -9  877.55   30.77
   7   4  -9  840.00   33.41
  -7   4   9  920.46   31.91
  -7  -4   9  844.76   32.05
  -7   4   8   76.52    8.25
   7  -4  -8   72.97    7.16
   7   4  -8   58.24    7.68
  -7   4   8   60.20    7.21
  -7  -4   8   72.71    7.97
  -7   4   7  106.82    9.82
   7   4  -7  100.88    6.42
   7  -4  -7   84.58    7.69
   7   4  -7  115.28   10.17
  -7   4   7  102.34    9.37
  -7  -4   7  104.94    9.44
   7   4  -6  529.85   16.95
   7  -4  -6  553.83   21.01
   7   4  -6  526.32   23.56
  -7   4   6  493.64   22.84
  -7  -4   6  550.00   23.26
  -7   4   5   17.02    4.40
   7  -4  -5   20.86    3.65
   7   4  -5   19.01    4.17
  -7  -4   5   16.96    4.11
  -7   4   4  696.90   27.85
   7  -4  -4  664.96   22.93
   7   4  -4  610.47   25.86
  -7  -4   4  670.71   26.09
  -7   4   3 1573.33   48.92
   7  -4  -3 1479.16   41.70
  -7  -4   3 1540.48   46.31
   7   4  -3 1498.78   46.50
  -7   4   2    4.74    2.32
   7   4  -2    4.67    2.60
  -7  -4   2    5.31    2.62
  -7   4   1  633.49   27.13
   7   4  -1  603.91   24.36
  -7  -4   1  643.40   24.64
  -7   4   0    0.99    2.04
   7  -4   0    3.49    1.76
   7   4   0    1.45    2.11
  -7  -4   0    2.88    2.00
   7  -4   1  365.90   13.10
   7   4   1  361.74   16.93
  -7  -4  -1  345.60   16.76
   7  -4   2   46.21    3.75
  -7  -4  -2   42.41    5.38
  -7  -4  -3    6.69    2.55
  -7  -4  -4  180.27   11.09
   7   4   4  197.37   13.76
  -7   4  -5  504.26   24.79
   7   4   5  542.55   24.39
  -7  -4  -5  554.22   21.17
   7  -4   5  515.64   20.78
  -7   4  -6    8.58    3.71
   7   4   6    8.37    3.07
   7   4   6    7.58    3.28
   7  -4   6    4.38    2.32
  -7  -4  -6    6.85    2.82
  -7   4  -7  633.34   29.12
   7   4   7  687.09   28.31
  -7  -4  -7  698.93   24.37
   7  -4   7  677.58   24.38
   7   4   7  707.02   26.37
   7   4   8  566.90   25.17
  -7  -4  -8  571.38   21.28
   7  -4   8  563.84   21.37
   7   4   8  564.64   22.76
   7   4   9  138.02   11.44
  -7  -4  -9  144.89    9.24
   7  -4   9  131.47    8.96
   7   4   9  139.58   10.12
   7   4  10  248.03   15.44
   7  -4  10  238.56   12.18
  -7  -4 -10  233.92   11.99
   7   4  10  224.88   12.93
   7   4  11    6.16    2.53
   7   4  11    4.70    3.14
   7  -4  11    0.55    1.53
  -7  -4 -11    8.19    2.20
   7   4  12  199.53   13.88
  -7  -4 -12  178.06   10.22
   7  -4  12  186.08   10.43
   7   4  12  210.29   12.08
   7   4  13  565.28   25.34
  -7  -4 -13  600.09   20.96
   7  -4  13  576.46   20.75
   7   4  13  596.92   22.52
  -7   4 -14   59.83    8.71
   7   4  14   42.50    5.35
   7   4  14   53.46    7.42
  -7  -4 -14   60.78    5.78
   7  -4  14   60.47    5.75
  -7   4 -15  279.27   18.90
   7   4  15  305.76   17.58
  -7  -4 -15  298.71   13.17
   7  -4  15  293.81   13.16
   7   4  15  313.34   14.54
   7   4  16   32.71    5.94
   7   4  16   36.76    4.73
  -7   4 -16   22.04    5.81
   7  -4  16   38.09    4.47
   7   4  17   97.72    7.45
  -7   4 -17  104.95   11.55
   7   4  17  101.34   10.08
   7  -4  17   99.75    7.15
   7   4  18  304.99   17.81
  -7   4 -18  300.57   19.80
   7  -4  18  288.50   12.59
   7   4  19  133.98   11.60
   7  -4  19  111.74    7.33
  -7   5  18   43.37    5.57
  -7   5  17  100.81    8.32
   7  -5 -16    2.22    3.25
  -7   5  16    6.24    2.64
   7  -5 -15  453.77   23.14
  -7   5  15  430.00   19.33
   7  -5 -14   37.88    6.74
  -7   5  14   37.37    5.65
   7   5 -13  307.45   14.72
  -7   5  13  316.10   17.96
   7  -5 -13  340.56   18.70
   7   5 -13  335.75   20.73
  -7   5  13  299.31   16.18
  -7  -5  13  331.67   19.27
   7   5 -12    1.13    2.03
  -7   5  12    4.90    2.72
  -7   5  12    4.79    3.19
   7  -5 -12    5.62    3.00
   7   5 -12    1.22    2.97
  -7  -5  12    4.18    2.73
   7   5 -11  584.87   21.01
  -7   5  11  580.04   25.89
   7  -5 -11  606.91   25.53
   7   5 -11  591.87   28.41
  -7   5  11  623.58   25.10
  -7  -5  11  559.37   26.18
  -7   5  10   15.64    3.96
  -7   5  10   24.22    5.24
   7  -5 -10   20.31    4.51
   7   5 -10   31.15    6.50
  -7  -5  10   22.16    4.95
  -7   5   9   74.06    8.57
   7  -5  -9   75.49    7.88
   7   5  -9   68.49    8.86
  -7  -5   9   47.50    7.11
  -7   5   9   73.74    8.22
  -7   5   8   27.91    5.40
   7   5  -8   26.99    3.33
  -7   5   8   30.66    5.88
   7  -5  -8   32.24    5.30
   7   5  -8   38.05    6.54
  -7  -5   8   27.21    5.50
  -7   5   7  315.48   18.05
  -7   5   7  338.67   18.91
   7   5  -7  315.63   11.68
   7  -5  -7  334.01   16.48
   7   5  -7  346.47   19.55
  -7  -5   7  325.19   18.37
  -7   5   6    1.95    2.38
  -7   5   6    3.00    2.92
   7   5  -6    1.86    1.16
   7  -5  -6    1.39    1.82
   7   5  -6    2.03    2.10
  -7  -5   6    0.94    2.75
  -7   5   5  796.86   32.61
  -7   5   5  903.70   33.81
   7  -5  -5  898.00   29.28
   7   5  -5  789.58   32.10
  -7  -5   5  807.96   31.80
  -7   5   4    9.15    3.76
  -7   5   4    8.20    3.55
   7  -5  -4    9.33    2.76
   7   5  -4    9.54    3.53
  -7  -5   4    8.20    3.26
  -7   5   3   21.88    5.48
  -7   5   3   24.78    5.26
   7  -5  -3   30.34    4.39
   7   5  -3   28.75    5.32
  -7  -5   3   36.67    5.93
  -7   5   2   12.54    3.99
  -7   5   2    9.56    3.81
   7  -5  -2   10.38    2.68
   7   5  -2    9.00    3.33
  -7  -5   2    6.14    2.69
  -7   5   1    6.32    3.23
   7  -5  -1    9.12    2.39
  -7   5   1    5.40    3.16
  -7  -5   1    6.03    2.76
  -7   5   0   12.02    4.16
  -7  -5   0    3.39    2.72
  -7   5  -1 1520.41   50.95
   7   5   1 1517.82   50.65
  -7  -5  -1 1509.51   46.92
   7  -5   2   61.80    7.38
  -7  -5  -2   58.22    7.22
   7  -5   3  471.07   21.44
  -7  -5  -3  520.94   22.26
   7  -5   4    3.19    2.45
  -7  -5  -4    0.79    2.20
  -7  -5  -5  750.99   28.18
   7  -5   5  748.61   28.22
  -7  -5  -6    2.30    2.13
   7  -5   6   -0.78    1.77
   7   5   7   95.34   10.19
  -7  -5  -7  100.31    8.77
   7  -5   7  103.81    9.02
   7   5   8  136.14   12.15
  -7  -5  -8  112.50    9.18
   7  -5   8  126.70    9.96
   7   5   8  127.60   10.10
   7   5   9  219.27   15.68
  -7  -5  -9  234.99   13.45
   7  -5   9  222.23   13.19
   7   5   9  225.51   13.58
   7   5  10    6.75    3.10
   7   5  10    3.22    2.63
   7  -5  10    7.16    3.18
  -7  -5 -10   10.78    3.26
   7   5  11  831.97   33.31
   7  -5  11  802.80   28.41
  -7  -5 -11  806.12   28.61
   7   5  11  793.34   28.75
   7   5  12   15.53    3.70
   7  -5  12   10.37    3.07
  -7  -5 -12   13.87    3.52
   7   5  12    3.25    2.84
   7   5  13   -0.69    1.79
  -7  -5 -13   -0.68    1.54
   7  -5  13    1.35    1.77
   7   5  14    0.66    1.61
   7  -5  14    1.32    1.83
   7   5  15   24.92    4.20
   7  -5  15   34.60    4.81
   7   5  16   -0.59    1.71
   7  -5  16    1.26    2.01
   7  -5  17  568.01   21.64
  -7   6  16    0.76    2.09
  -7   6  15  129.59   10.48
  -7   6  14  204.62   13.44
  -7   6  13    0.86    2.51
   7  -6 -12  158.91   12.78
   7   6 -12  138.12    8.92
  -7   6  12  169.26   12.31
  -7   6  11   49.89    6.92
   7   6 -11   53.72    5.27
   7  -6 -11   50.10    7.10
  -7   6  10    9.60    3.66
  -7   6  10    1.03    2.33
   7  -6 -10    5.53    3.19
  -7   6   9   94.31    9.90
  -7   6   9   92.40    9.97
   7   6  -9   83.57    5.75
   7  -6  -9  103.71    9.64
   7   6  -8   19.21    2.47
  -7   6   8   23.39    4.99
  -7   6   8   30.50    6.31
   7  -6  -8   27.34    5.32
  -7   6   7  197.04   14.68
  -7   6   7  210.09   15.24
   7   6  -7  205.26   15.72
   7  -6  -7  209.58   13.45
  -7   6   6  219.27   15.60
  -7   6   6  212.70   15.18
   7   6  -6  214.44   15.71
   7  -6  -6  216.02   13.42
  -7   6   5   78.45    9.43
  -7   6   5   92.16   10.23
   7  -6  -5  102.04    8.82
  -7   6   4  184.01   14.46
  -7   6   4  187.84   14.80
  -7  -6   4  204.91   14.61
  -7   6   3  243.74   16.97
  -7   6   3  277.18   18.13
   7   6  -3  249.95   18.07
  -7  -6   3  277.42   17.26
   7   6  -2   27.40    6.33
  -7   6   2   29.05    6.29
  -7   6   2   27.19    6.04
  -7  -6   2   27.11    5.67
  -7   6   1  292.14   18.63
  -7   6   1  287.59   18.80
   7   6  -1  284.67   19.03
  -7  -6   1  278.87   17.13
  -7   6   0   39.41    7.25
   7  -6   0   46.83    7.31
  -7  -6   0   46.13    6.97
   7  -6   1   36.28    6.27
  -7  -6  -1   42.62    6.57
   7  -6   2  228.30   15.20
  -7  -6  -2  244.03   15.62
   7  -6   3   15.31    4.34
  -7  -6  -3   16.07    4.38
   7  -6   4   13.32    4.23
  -7  -6  -4   19.62    4.74
  -7  -6  -5  295.68   17.33
   7  -6   5  319.18   17.91
  -7  -6  -6   28.22    5.22
   7  -6   6   30.50    5.76
  -7  -6  -7  435.09   21.10
   7  -6   7  408.56   20.70
  -7  -6  -8  108.32    9.90
   7  -6   8   89.09    9.30
  -7  -6  -9   10.53    3.45
   7  -6   9   13.95    4.11
   7  -6  10  132.47   11.01
  -7  -6 -10  143.31   11.51
   7   6  10  138.01   10.93
   7   6  11    0.78    2.29
   7  -6  11   -1.70    2.60
   7  -6  12  168.28   12.31
   7   6  12  185.58   12.33
   7  -6  13  196.87   13.20
   7  -6  14   40.07    6.08
   8   0 -25    0.76    1.86
   8   0 -24    4.62    2.66
   8   0 -23   -1.19    2.46
   8   0 -23   -0.78    2.04
   8   0 -23   -1.20    2.93
   8   0 -22  117.92   11.62
   8   0 -22  136.32   12.58
   8   0 -22  103.08    9.19
   8   0 -21   -2.24    2.74
   8   0 -21    0.80    1.66
   8   0 -21    2.30    2.60
   8   0 -20  524.26   24.98
   8   0 -20  444.16   20.90
   8   0 -20  499.09   24.80
   8   0 -19   -1.05    2.38
   8   0 -19   -0.83    1.87
   8   0 -19   -1.10    3.04
   8   0 -18  134.04   11.69
   8   0 -18  158.66   11.51
   8   0 -17    0.98    2.57
   8   0 -17   -0.84    1.74
   8   0 -16   23.87    5.02
   8   0 -16   23.76    4.73
   8   0 -15   -0.92    1.91
   8   0 -15   -0.85    2.09
   8   0 -14 2718.62   72.67
   8   0 -14 2476.29   71.91
   8   0 -14 2548.39   70.94
   8   0 -13    1.72    2.39
   8   0 -13    2.54    2.35
   8   0 -13    0.92    1.89
   8   0 -12  154.64   11.50
   8   0 -12  164.11   11.94
   8   0 -12  192.01   12.97
   8   0 -11    1.60    1.65
   8   0 -11    0.84    2.18
   8   0 -11   -0.85    2.23
   8   0 -10  763.01   28.85
   8   0 -10  823.87   30.31
   8   0 -10  819.26   30.09
   8   0  -9   -0.82    1.86
   8   0  -9   -0.79    1.63
   8   0  -8  322.59   17.06
   8   0  -8  339.56   16.77
  -8   0   7    0.61    1.37
   8   0  -7    0.80    1.81
   8   0  -7    0.72    1.32
  -8   0   6  168.32   10.33
   8   0  -6  185.17   12.15
   8   0  -6  181.74   11.24
   8   0  -5   -0.78    1.92
  -8   0   5   -1.19    1.82
   8   0  -5   -0.64    1.56
  -8   0   4 1623.49   45.47
   8   0  -4 1563.89   47.88
   8   0  -4 1614.30   45.53
   8   0  -3    0.77    1.23
  -8   0   3    0.59    1.23
   8   0  -3    1.12    1.27
   8   0  -2   26.16    4.63
  -8   0   2   18.33    3.49
   8   0  -2   22.33    3.62
   8   0  -1    2.30    1.74
  -8   0   1   -0.59    1.55
   8   0  -1    0.48    1.17
  -8   0   0  231.53   12.28
   8   0   0  237.60   11.04
  -8   0  -1    1.20    1.57
   8   0   1    1.97    1.32
  -8   0  -2 3148.13   82.78
   8   0   2 3148.08   74.92
   8   0   3   -0.75    1.84
  -8   0  -3   -0.78    1.61
   8   0   3    1.24    1.11
   8   0   4 1273.82   39.48
   8   0   4 1222.11   31.17
   8   0   5    2.26    1.84
  -8   0  -5    0.80    1.28
   8   0   5    1.28    0.86
   8   0   6  643.29   16.89
  -8   0  -6  672.12   26.32
   8   0   7   -0.43    1.13
  -8   0  -7    0.82    1.86
   8   0   8  461.31   16.38
  -8   0  -8  431.64   20.58
   8   0   9    1.63    1.13
  -8   0  -9   -0.84    1.73
   8   0  10  214.56    9.94
  -8   0 -10  230.84   14.23
   8   0  11    0.78    1.13
  -8   0 -11   -0.86    1.58
   8   0  12  583.83   18.94
  -8   0 -12  584.91   24.78
   8   0  13   -0.37    1.66
  -8   0 -13    0.86    2.11
   8   0  14  229.92   10.19
  -8   0 -14  229.25   14.12
   8   0  15    1.12    1.69
  -8   0 -15    0.85    2.23
   8   0  16  357.44   13.34
  -8   0 -16  329.76   17.51
  -8   0 -17   -0.84    2.06
  -8   0 -18  441.48   20.56
  -8   0 -19   -0.82    1.86
  -8   0 -20  403.67   19.31
  -8   0 -21    2.40    2.46
   8   1 -26  144.44   11.43
   8   1 -25    6.80    3.05
   8  -1 -24  171.31   11.47
   8   1 -24  129.53   10.80
   8  -1 -23   12.77    3.81
   8   1 -23   14.84    4.61
   8   1 -23   15.75    3.80
   8  -1 -23   17.82    4.79
   8   1 -23   16.26    4.91
   8  -1 -22  331.39   17.14
   8   1 -22  373.46   20.89
   8   1 -22  414.68   22.93
   8   1 -22  372.81   19.09
   8  -1 -22  382.91   21.58
   8  -1 -21  243.73   14.29
   8   1 -21  275.68   17.53
   8   1 -21  266.23   17.94
   8   1 -21  278.36   16.18
   8  -1 -21  293.81   18.38
   8  -1 -20   55.44    6.69
   8   1 -20   71.41    8.87
   8   1 -20   61.38    7.62
   8  -1 -20   62.45    8.35
   8   1 -20   66.78    8.83
   8  -1 -19  315.44   16.35
   8   1 -19  304.75   18.07
   8   1 -19  276.14   18.34
   8   1 -19  321.67   17.72
   8  -1 -19  321.86   19.19
   8  -1 -18  111.10    9.43
   8   1 -18  117.49   10.72
   8   1 -18  118.79   10.60
   8  -1 -17   31.01    5.25
   8   1 -17   45.89    6.64
   8   1 -17   35.78    5.86
   8  -1 -16  600.05   24.32
   8   1 -16  577.02   25.18
   8   1 -16  581.20   25.30
   8  -1 -15   48.66    6.32
   8  -1 -15   64.08    8.05
   8   1 -15   68.50    7.76
   8   1 -15   73.54    8.17
   8  -1 -14  169.19   11.73
   8  -1 -14  155.02   12.25
   8   1 -14  160.13   11.65
   8  -1 -14  151.18   12.02
   8   1 -14  176.79   12.64
   8   1 -14  142.28   11.83
   8  -1 -13   49.94    6.94
   8   1 -13   50.25    6.37
   8  -1 -13   56.16    6.80
   8  -1 -13   61.23    7.47
   8   1 -13   64.09    7.60
   8   1 -13   65.02    7.80
   8  -1 -12    3.25    2.60
   8   1 -12    0.77    1.58
   8   1 -12    2.68    2.18
   8  -1 -12    5.41    3.00
   8   1 -12    0.92    1.90
   8   1 -11  908.01   31.36
   8  -1 -11  892.10   32.13
   8  -1 -11  922.87   33.29
   8   1 -11  928.85   33.40
   8   1 -11  875.40   32.79
   8   1 -10 1014.00   33.67
   8  -1 -10  998.68   35.11
   8   1 -10 1068.80   36.16
   8  -1 -10 1083.96   36.37
   8   1 -10 1022.30   36.14
  -8   1   9  213.31   12.73
   8  -1  -9  218.59   13.54
   8   1  -9  210.23   12.22
   8   1  -9  209.99   13.24
   8  -1  -9  233.18   13.91
   8   1  -9  213.86   13.83
  -8   1   8  632.43   24.22
   8  -1  -8  634.65   25.39
   8   1  -8  648.29   25.14
   8  -1  -8  592.15   24.38
   8   1  -8  602.79   25.25
  -8   1   7   79.42    7.51
   8  -1  -7   87.29    8.24
   8   1  -7   64.91    6.98
   8  -1  -7   78.61    7.67
   8   1  -7   84.75    8.30
  -8   1   6  183.37   11.52
   8  -1  -6  179.56   12.16
   8   1  -6  157.02   10.56
  -8   1   6  159.64   11.12
   8  -1  -6  170.19   11.18
   8   1  -6  179.99   12.24
   8  -1  -5  871.86   31.21
  -8   1   5  887.02   30.25
   8   1  -5  839.69   28.90
   8  -1  -5  831.21   29.32
   8   1  -5  897.44   31.74
   8  -1  -4  378.55   18.52
  -8   1   4  359.66   17.30
   8   1  -4  422.86   17.37
   8  -1  -4  393.01   17.33
   8   1  -4  379.18   18.61
  -8   1   3  523.96   21.60
  -8  -1   3  552.49   19.18
   8  -1  -3  537.06   22.76
   8   1  -3  538.04   20.19
   8  -1  -3  501.71   20.32
   8   1  -3  542.01   22.88
  -8   1   2  960.81   32.06
  -8  -1   2  944.49   28.63
   8  -1  -2  981.31   33.43
   8   1  -2  943.35   29.42
   8  -1  -2  931.76   30.17
  -8   1   1   97.26    8.35
  -8  -1   1  113.24    7.37
   8   1  -1  105.13    7.17
  -8   1   1   95.70    8.58
   8  -1  -1  100.11    7.41
  -8   1   0 1072.54   34.78
  -8  -1   0 1101.90   31.43
   8   1   0 1014.32   30.43
   8  -1   0 1086.89   31.78
  -8   1   0 1012.24   35.33
  -8  -1  -1  142.87    8.30
   8   1   1  133.09    7.59
   8  -1   1  120.38    7.63
  -8   1  -1  118.59    9.76
  -8  -1  -2  154.35    8.82
   8   1   2  147.75    7.81
   8  -1   2  162.61    8.49
  -8   1  -2  150.34   11.01
   8   1   2  151.30   10.71
  -8  -1  -3  237.03   11.42
   8   1   3  249.64   10.22
   8   1   3  237.42   13.71
   8  -1   3  239.17   10.44
  -8   1  -3  226.98   14.09
   8   1   4  129.69    6.52
   8  -1   4  130.22    6.90
   8   1   4  126.67    9.74
  -8   1  -4  134.00   10.49
   8   1   5   52.04    3.65
   8  -1   5   63.20    4.26
   8   1   5   50.15    6.14
  -8   1  -5   54.95    6.82
   8   1   6  927.30   31.49
   8   1   6  886.78   22.95
   8  -1   6  911.19   23.75
  -8   1  -6  842.29   32.11
   8  -1   7   94.71    5.25
   8   1   7   86.09    7.14
   8   1   7  101.63    8.63
   8  -1   7   87.29    4.24
  -8   1  -7   76.02    8.42
   8   1   8  581.64   23.43
   8  -1   8  621.08   17.21
   8   1   8  593.93   21.56
   8  -1   8  553.90   14.72
  -8   1  -8  652.87   26.40
   8  -1   8  597.80   14.76
   8  -1   9  809.71   21.56
   8   1   9  799.35   26.64
  -8   1  -9  762.98   30.64
   8  -1  10    4.98    1.25
   8   1  10    1.68    1.55
   8   1  10    3.60    2.40
  -8   1 -10    1.83    2.08
   8   1  11  556.65   20.45
   8  -1  11  541.25   14.95
  -8   1 -11  577.01   25.11
   8   1  12  129.82    8.57
  -8   1 -12  118.46   10.56
   8   1  13   99.70    7.45
  -8   1 -13  120.66   10.59
   8   1  14  367.12   15.65
  -8   1 -14  374.91   19.56
   8   1  15   56.72    5.60
  -8   1 -15   40.53    6.25
   8   1  16  263.70   12.88
  -8   1 -16  282.16   16.58
   8   1  17  320.24   14.56
  -8   1 -17  345.82   18.51
   8   1  18   13.86    3.05
  -8   1 -18   13.91    4.03
   8   1  19  170.71   10.05
  -8   1 -19  151.73   11.93
  -8   1 -20  657.46   27.16
  -8   1 -21   -0.90    2.62
  -8   1 -22  296.25   16.74
  -8   1 -23    0.87    2.40
   8   2 -26    3.90    3.12
   8   2 -25  654.52   28.04
   8   2 -24   13.93    4.42
   8   2 -23  141.32   12.70
   8   2 -23  113.72   10.85
   8   2 -22   -1.07    2.42
   8   2 -22    1.00    2.46
   8  -2 -22   -1.18    2.18
   8   2 -22    1.28    2.89
   8  -2 -21  108.81   11.66
   8   2 -21   92.87    9.80
   8   2 -21   97.79   11.12
   8   2 -21   88.83    9.82
   8  -2 -21   90.86   10.24
   8  -2 -20   75.93    9.59
   8   2 -20   70.76    8.44
   8   2 -20   77.87    8.91
   8  -2 -20   82.98    9.89
   8   2 -20   71.15    9.55
   8   2 -19  146.05   11.98
   8  -2 -19  143.05   13.08
   8  -2 -19  165.80   13.57
   8   2 -19  142.49   12.13
   8  -2 -18    5.70    3.50
   8   2 -18   13.89    3.83
   8   2 -17  557.25   24.56
   8  -2 -17  597.58   27.41
   8   2 -16   17.10    4.12
   8   2 -15 1039.41   35.66
   8   2 -14   37.05    5.57
   8   2 -14   46.62    6.89
   8   2 -13   15.02    3.41
   8   2 -13    9.99    3.59
   8   2 -12   10.67    3.02
   8   2 -12   14.43    3.88
  -8  -2  12    9.04    3.13
   8   2 -11  414.49   18.31
  -8   2  11  460.91   20.58
   8   2 -11  434.81   21.12
  -8  -2  11  401.56   20.06
   8   2 -11  400.74   20.51
  -8   2  11  398.24   18.47
  -8   2  10    4.03    2.24
  -8   2  10    2.94    2.26
   8   2 -10    7.39    3.42
   8   2 -10    7.03    2.51
   8   2 -10    4.43    2.84
  -8  -2  10    1.69    2.59
   8   2  -9 1112.19   34.21
  -8   2   9 1078.95   36.71
   8   2  -9 1121.80   37.64
   8   2  -9 1077.88   38.11
  -8   2   9 1115.13   36.33
  -8  -2   9 1106.34   37.09
   8   2  -8  279.87   13.25
  -8   2   8  250.53   14.75
   8   2  -8  282.18   15.50
   8   2  -8  230.90   14.84
  -8   2   8  255.19   14.36
  -8  -2   8  262.41   14.80
  -8   2   7  196.13   12.67
   8   2  -7  195.97   12.33
   8   2  -7  186.12   12.89
  -8  -2   7  163.48   11.35
  -8   2   7  191.79   12.38
   8   2  -6   33.14    5.45
  -8   2   6   26.42    4.71
  -8   2   6   46.61    6.03
   8   2  -6   34.45    5.07
  -8  -2   6   29.01    4.79
  -8   2   5  724.94   27.56
   8   2  -5  696.62   25.80
   8   2  -5  713.67   28.00
  -8  -2   5  680.12   25.68
  -8   2   5  703.97   27.06
  -8   2   4  173.45   12.05
   8   2  -4  186.98   11.39
   8   2  -4  180.38   12.59
  -8  -2   4  182.23   11.22
  -8   2   4  200.46   12.76
  -8   2   3 1533.99   46.62
   8   2  -3 1532.52   43.68
  -8  -2   3 1462.35   43.57
  -8   2   2   87.58    8.48
   8   2  -2   79.58    6.92
  -8  -2   2   91.88    7.39
  -8   2   1  277.19   15.66
   8   2  -1  282.87   13.29
  -8  -2   1  279.57   13.45
   8   2   0    6.44    3.16
   8   2   0    6.75    2.20
  -8  -2   0    7.10    2.26
   8   2   1  942.56   28.45
  -8  -2  -1  938.17   28.79
  -8   2  -1  941.77   33.58
   8   2   1  866.30   31.90
  -8  -2  -2   74.15    4.94
   8   2   2   83.26    6.13
  -8  -2  -2   87.75    6.47
  -8   2  -2   80.51    8.38
   8   2   2   74.75    7.64
  -8  -2  -3  215.68    9.08
   8   2   3  217.17   10.27
  -8  -2  -3  216.20   10.48
  -8   2  -3  220.25   14.10
   8   2   3  209.62   13.09
  -8  -2  -4   90.54    5.53
   8   2   4   93.85    6.06
   8   2   4   65.99    7.15
  -8  -2  -4   89.36    6.16
  -8   2  -4   73.88    8.23
  -8  -2  -5  442.26   15.08
   8   2   5  443.34   15.32
  -8   2  -5  476.19   22.14
  -8  -2  -5  440.18   15.76
   8  -2   6   38.96    2.02
   8  -2   6   38.85    2.11
   8   2   6   36.19    5.16
  -8   2  -6   34.49    5.96
  -8  -2  -6   38.42    3.70
   8   2   6   44.69    5.82
  -8  -2  -6   36.41    3.59
  -8  -2  -7 1162.21   32.40
   8   2   7 1225.65   38.17
   8  -2   7 1149.58   31.63
   8   2   7 1209.91   38.27
  -8   2  -7 1189.09   41.04
  -8  -2  -7 1252.07   31.69
   8   2   8  299.27   15.53
   8  -2   8  299.23   11.32
  -8   2  -8  339.01   18.51
  -8  -2  -8  335.60   11.19
   8   2   8  335.42   16.35
   8   2   9  214.39   12.49
   8  -2   9  193.48    7.99
   8   2   9  210.85   12.58
  -8   2  -9  230.81   15.06
  -8   2 -10    1.00    2.26
   8   2  10    0.72    1.63
   8   2  10   -0.71    1.96
   8  -2  10    0.43    0.69
   8   2  11  185.29   11.61
   8   2  11  174.90   11.24
   8  -2  11  170.68    6.38
  -8   2 -11  196.09   14.05
  -8   2 -12   54.25    7.70
   8   2  12   70.98    7.13
   8   2  12   68.50    7.07
   8  -2  12   66.05    2.87
   8   2  13 1025.51   33.90
   8   2  13 1054.11   33.90
  -8   2 -13 1029.09   38.06
   8   2  14   54.08    6.18
  -8   2 -14   62.01    8.03
   8   2  15  287.28   14.83
  -8   2 -15  278.56   17.32
   8   2  16   -0.70    2.16
  -8   2 -16    1.04    2.54
   8   2  17  616.60   23.87
  -8   2 -17  603.79   27.11
   8   2  18   14.93    3.62
  -8   2 -18   25.80    5.41
   8   2  19   77.43    7.56
  -8   2 -19   64.64    8.19
   8   2  20   11.49    3.52
  -8   2 -20   16.31    4.33
   8   2  21   81.93    7.96
  -8   2 -21   94.12   10.16
  -8   2 -22   18.05    4.65
  -8   2 -23  461.87   22.95
  -8   2 -24   99.39   10.05
   8   3 -22    1.04    3.03
   8   3 -21  467.20   23.05
   8   3 -20   10.62    4.00
   8   3 -20   19.86    5.34
   8  -3 -19  247.59   16.64
   8   3 -19  223.21   14.81
   8  -3 -18   19.36    5.08
   8   3 -18   22.23    4.94
  -8  -3  18   13.17    4.32
   8  -3 -17   13.49    4.29
   8   3 -17    7.72    3.08
  -8  -3  17   12.82    4.07
   8  -3 -16  268.27   16.71
   8   3 -16  263.62   15.20
  -8  -3  16  267.74   16.90
   8   3 -15  379.44   18.36
   8  -3 -15  401.63   20.47
   8   3 -15  363.13   21.25
  -8  -3  15  389.20   20.74
   8   3 -14   11.19    3.45
  -8   3  14   13.73    3.47
   8  -3 -14    7.37    3.30
   8   3 -14    5.57    3.10
  -8  -3  14    8.80    3.62
   8   3 -13  440.20   19.38
   8  -3 -13  410.56   20.57
   8   3 -13  445.01   22.97
  -8   3  13  446.55   19.58
  -8  -3  13  469.03   22.24
   8   3 -12    0.67    1.64
  -8   3  12    1.51    2.32
   8  -3 -12    1.69    2.47
   8   3 -12    5.22    3.34
  -8  -3  12    1.85    2.09
  -8   3  11  783.04   30.78
   8   3 -11  834.90   28.10
   8  -3 -11  822.17   30.41
   8   3 -11  868.10   33.32
  -8  -3  11  887.88   32.24
  -8   3  11  804.93   29.61
  -8   3  10   27.43    5.20
   8   3 -10   19.92    3.71
  -8   3  10   33.16    5.34
   8  -3 -10   29.28    4.81
   8   3 -10   25.21    5.33
  -8  -3  10   29.67    5.32
  -8   3   9   45.39    6.30
   8   3  -9   34.56    4.42
  -8   3   9   34.73    5.53
   8  -3  -9   28.42    4.72
   8   3  -9   24.26    4.93
  -8  -3   9   37.35    5.75
  -8   3   8    3.57    2.47
  -8   3   8   -0.82    2.01
   8  -3  -8    0.69    2.20
   8   3  -8    0.90    2.19
  -8  -3   8    2.47    1.86
  -8   3   7  314.11   17.53
   8  -3  -7  328.73   15.67
   8   3  -7  338.39   17.75
  -8   3   7  348.37   17.81
  -8  -3   7  323.75   16.89
  -8   3   6    1.80    2.62
  -8   3   6    1.71    2.23
   8  -3  -6    0.61    1.58
   8   3  -6   -0.82    1.85
  -8  -3   6    1.55    2.38
  -8   3   5  533.87   24.04
   8  -3  -5  543.93   20.27
   8   3  -5  507.18   22.19
  -8   3   5  574.69   24.20
  -8  -3   5  544.32   22.49
  -8   3   4   39.08    6.18
  -8   3   4   43.22    6.22
   8  -3  -4   47.48    5.07
   8   3  -4   43.98    5.75
  -8  -3   4   34.27    5.16
  -8   3   3   27.40    5.03
  -8   3   3   22.35    4.56
   8   3  -3   23.43    4.34
  -8  -3   3   36.60    5.11
  -8   3   2  169.25   12.52
   8   3  -2  160.68   10.71
  -8   3   2  176.47   12.73
  -8  -3   2  181.39   11.26
   8   3  -1   13.11    3.62
  -8   3   1    9.23    3.20
   8   3  -1   10.48    2.85
  -8  -3   1    8.52    2.51
   8  -3   0  166.84    8.13
   8   3   0  172.26   10.53
   8   3   0  147.67   11.42
  -8  -3   0  170.65   10.58
   8  -3   1  287.14   10.81
   8   3   1  278.92   13.69
  -8  -3  -1  300.76   14.20
   8   3   2   16.71    3.96
   8  -3   2   26.12    2.69
   8   3   2   10.78    2.76
  -8  -3  -2   27.39    4.19
   8  -3   3 1356.78   33.37
   8   3   3 1308.47   38.66
  -8   3  -3 1400.35   46.09
   8   3   3 1406.49   43.83
  -8  -3  -3 1418.68   39.67
   8  -3   4    7.53    1.06
  -8   3  -4   10.19    3.40
   8   3   4    4.87    2.71
  -8  -3  -4    4.79    2.15
   8   3   5   91.40    8.83
  -8   3  -5   93.16    9.78
   8   3   5  106.27    9.21
  -8  -3  -5   93.37    6.93
  -8   3  -6  133.28   11.71
   8   3   6  144.22   11.14
   8  -3   6  135.96    8.31
  -8  -3  -6  128.62    8.03
   8   3   6  130.19   10.14
   8   3   7  131.73   10.67
  -8   3  -7  152.18   12.62
  -8  -3  -7  144.60    8.47
   8   3   7  147.07   10.72
   8   3   8  203.54   13.33
  -8   3  -8  209.32   15.04
   8   3   8  203.84   12.76
  -8  -3  -8  216.90   10.24
   8   3   9  406.55   19.33
  -8  -3  -9  346.27    9.50
  -8   3  -9  400.38   21.47
   8   3   9  385.27   17.95
  -8  -3  -9  385.18   14.04
   8   3  10    2.54    2.83
  -8   3 -10    7.77    3.84
  -8  -3 -10    4.30    0.99
   8   3  10    8.08    3.04
  -8  -3 -10    3.65    1.62
   8   3  11  462.00   21.19
  -8  -3 -11  431.69   12.90
  -8   3 -11  490.68   24.44
   8   3  11  459.86   19.83
  -8  -3 -11  481.51   15.41
   8   3  12    2.13    2.27
  -8   3 -12    1.14    2.35
   8   3  12    2.53    2.58
   8  -3  12    1.72    1.31
  -8  -3 -12    1.75    1.29
   8   3  13  226.23   12.85
  -8   3 -13  203.87   15.45
   8   3  13  236.90   14.25
   8  -3  13  205.79    9.00
  -8  -3 -13  216.24    8.31
   8   3  14    0.85    2.35
  -8   3 -14    5.76    3.37
   8   3  14    2.72    2.08
  -8  -3 -14    1.68    0.94
   8  -3  14    0.29    1.09
  -8   3 -15   49.89    7.73
   8   3  15   92.89    7.75
   8   3  15   72.19    7.80
   8  -3  15   77.21    4.41
   8   3  16    0.85    2.72
  -8   3 -16    1.17    2.86
   8  -3  16    2.31    0.99
   8   3  17  396.91   19.22
  -8   3 -17  388.45   21.87
   8  -3  17  344.50   10.37
   8   3  18   12.77    3.86
  -8   3 -18    4.71    3.93
   8   3  19  257.28   15.42
  -8   3 -19  242.56   17.22
   8   3  20    6.93    3.20
  -8   3 -20    7.03    3.60
   8   3  21   37.32    5.95
   8   3  22   91.54    9.10
   8   4 -21   76.99    8.87
   8   4 -20  376.86   19.78
   8   4 -19  214.15   14.22
   8   4 -18   45.69    6.64
   8  -4 -17  208.50   15.13
   8   4 -17  165.99   12.07
   8  -4 -16   -1.06    2.92
   8   4 -16    3.14    2.41
  -8   4  16    4.30    2.48
   8   4 -15  506.85   21.36
   8   4 -15  445.30   24.66
  -8  -4  15  478.49   23.93
  -8   4  15  472.57   20.78
   8   4 -14  269.90   14.45
   8  -4 -14  286.60   17.10
   8   4 -14  289.25   18.87
  -8  -4  14  280.69   17.56
  -8   4  14  274.49   15.13
   8   4 -13    0.67    1.85
  -8   4  13   -0.80    1.80
  -8   4  13    0.96    2.52
   8  -4 -13    1.86    2.43
   8   4 -13    1.17    2.85
  -8  -4  13   -1.02    2.30
  -8   4  12  219.21   14.92
   8   4 -12  239.68   12.88
   8  -4 -12  281.13   16.04
   8   4 -12  244.52   16.81
  -8   4  12  254.28   14.76
  -8  -4  12  233.76   15.51
  -8   4  11    8.69    3.68
   8   4 -11   11.71    2.82
  -8   4  11    7.60    3.22
   8  -4 -11    7.59    3.02
   8   4 -11    6.57    3.65
  -8  -4  11    6.83    3.13
   8   4 -10  173.83    9.98
   8  -4 -10  169.66   11.91
   8   4 -10  164.87   13.33
  -8   4  10  194.38   12.97
  -8  -4  10  187.20   13.40
   8  -4  -9  218.02   13.28
   8   4  -9  209.57   14.96
  -8   4   9  224.16   14.28
  -8  -4   9  242.87   15.22
   8  -4  -8  213.38   12.64
   8   4  -8  198.48   14.27
  -8   4   8  217.01   14.13
  -8  -4   8  205.35   13.76
   8   4  -7   21.41    3.12
  -8   4   7   19.34    4.45
   8  -4  -7   21.51    4.10
   8   4  -7   20.16    4.88
  -8  -4   7   23.93    4.80
   8  -4  -6  344.70   15.85
   8   4  -6  315.94   17.76
  -8   4   6  351.41   18.80
  -8  -4   6  304.84   16.97
  -8   4   5   50.00    7.12
   8  -4  -5   42.61    5.11
   8   4  -5   56.40    7.14
  -8  -4   5   43.89    6.27
   8  -4  -4  533.36   19.90
   8   4  -4  547.76   23.77
  -8  -4   4  518.01   22.73
  -8   4   4  533.50   24.63
   8  -4  -3  218.73   11.14
   8   4  -3  214.34   13.70
  -8  -4   3  212.26   13.36
  -8   4   3  225.82   15.23
  -8   4   2   27.83    5.75
   8   4  -2   35.47    5.31
  -8  -4   2   27.32    4.77
  -8   4   1  184.09   13.95
   8   4  -1  189.45   12.26
  -8  -4   1  200.97   12.53
  -8   4   0    1.06    2.40
   8  -4   0    0.76    1.17
   8   4   0    1.49    2.06
  -8  -4   0    0.74    1.68
   8  -4   1  137.21    7.04
   8   4   1  131.25    9.70
  -8  -4  -1  122.64    9.38
   8  -4   2  777.62   21.50
  -8  -4  -2  752.33   27.52
   8   4   3  290.88   16.53
  -8  -4  -3  283.37   14.58
  -8   4  -4  264.17   17.45
   8   4   4  246.96   16.12
  -8  -4  -4  271.41   14.12
   8   4   4  258.30   15.46
  -8   4  -5   70.71    8.94
   8   4   5   71.69    8.72
  -8  -4  -5   69.44    6.62
   8  -4   5   59.65    6.31
   8   4   5   75.20    8.11
  -8   4  -6  174.42   14.15
   8   4   6  161.99   12.79
   8  -4   6  167.61   10.39
  -8  -4  -6  174.81   10.68
   8   4   6  169.54   12.04
  -8   4  -7  767.57   32.58
   8   4   7  726.43   30.04
  -8  -4  -7  759.18   25.92
   8  -4   7  741.39   25.94
   8   4   7  710.54   28.06
  -8   4  -8  318.41   19.69
   8   4   8  293.75   17.54
  -8  -4  -8  310.84   14.43
   8  -4   8  267.70   13.72
   8   4   8  298.83   16.13
  -8   4  -9    6.05    3.35
   8   4   9    5.55    2.65
   8   4   9    1.98    2.24
   8  -4   9    8.06    2.44
  -8  -4  -9    3.97    1.82
  -8   4 -10   51.46    8.11
   8   4  10   52.91    6.56
   8   4  10   69.80    8.37
   8  -4  10   64.34    6.08
  -8  -4 -10   59.82    5.87
  -8   4 -11    3.73    2.57
   8   4  11    2.28    1.98
   8   4  11    0.98    2.40
   8  -4  11   -0.53    1.84
  -8  -4 -11    0.52    1.74
  -8   4 -12  423.48   23.94
   8   4  12  454.22   22.13
   8  -4  12  417.67   16.65
  -8  -4 -12  423.95   16.53
   8   4  12  416.64   19.10
  -8   4 -13  414.77   23.92
   8   4  13  404.20   21.09
   8  -4  13  424.37   16.42
  -8  -4 -13  423.08   16.15
   8   4  13  427.49   18.92
   8   4  14    2.78    2.03
  -8   4 -14    2.55    3.33
   8   4  14    0.98    3.15
   8  -4  14   -0.47    1.93
   8   4  15    0.99    2.73
   8   4  15    8.81    2.94
   8  -4  15    4.91    2.15
   8   4  16   50.36    7.18
   8   4  16   47.03    5.56
   8  -4  16   33.58    4.04
   8   4  17   68.98    8.39
   8   4  17   53.32    5.94
   8   5 -20    0.89    2.71
   8   5 -19   36.78    6.27
   8   5 -18   18.90    4.57
  -8   5  18   15.31    3.60
   8   5 -17    6.28    2.90
  -8   5  17    3.67    2.45
   8   5 -16  431.80   19.44
  -8   5  16  423.60   19.63
   8  -5 -15    1.07    2.21
   8   5 -15   -1.42    2.36
  -8   5  15    1.60    2.56
   8  -5 -14    6.16    3.29
   8   5 -14    7.35    2.55
  -8   5  14   10.00    3.36
   8  -5 -13   10.81    3.97
   8   5 -13   10.62    3.06
  -8   5  13   12.10    3.67
  -8   5  12   81.04    9.49
   8   5 -12  111.70    8.18
   8  -5 -12  100.55    9.76
   8   5 -12  101.42   11.54
  -8   5  12  108.05    9.93
  -8   5  11   18.53    4.67
   8   5 -11   20.81    3.57
  -8   5  11   13.76    4.08
   8  -5 -11   14.34    3.99
   8   5 -11   20.76    5.65
  -8   5  10  411.63   21.72
   8  -5 -10  400.88   19.76
   8   5 -10  436.05   23.54
  -8  -5  10  413.62   21.78
  -8   5  10  425.37   21.02
  -8   5   9   13.61    4.34
  -8   5   9   12.50    4.27
   8  -5  -9   13.80    3.98
   8   5  -9   15.03    4.79
  -8  -5   9   15.37    4.65
  -8   5   8  461.15   23.32
   8   5  -8  453.96   15.53
   8  -5  -8  466.15   20.58
   8   5  -8  473.13   24.27
  -8   5   8  492.89   23.15
  -8  -5   8  434.94   22.23
  -8   5   7   11.14    3.87
  -8   5   7   11.78    4.21
   8  -5  -7    9.46    3.02
   8   5  -7   24.87    5.66
  -8  -5   7   10.85    4.18
  -8   5   6   91.46    9.83
   8  -5  -6   92.72    8.17
   8   5  -6   90.94    9.80
  -8  -5   6   87.06    9.23
  -8   5   6   87.45    9.67
  -8   5   5    4.29    2.62
  -8   5   5    2.18    2.46
   8  -5  -5    2.61    1.91
   8   5  -5    8.07    3.49
  -8  -5   5    3.79    2.91
  -8   5   4  133.38   12.02
  -8   5   4  110.20   10.97
   8  -5  -4  110.66    8.36
   8   5  -4  100.75    9.94
  -8  -5   4  102.51    9.88
  -8   5   3   94.73   10.37
  -8   5   3   84.28    9.96
   8  -5  -3   77.77    6.78
   8   5  -3   93.96    9.63
  -8  -5   3  101.62    9.53
  -8   5   2  426.33   22.91
  -8   5   2  437.69   22.98
   8  -5  -2  453.48   17.37
   8   5  -2  424.61   21.07
  -8  -5   2  400.35   20.33
   8  -5  -1    1.45    1.55
  -8   5   1   -1.14    2.97
  -8   5   1    3.44    3.18
  -8  -5   1   -2.66    2.16
  -8   5   0  701.86   30.85
  -8  -5   0  639.43   26.73
  -8   5  -1   69.87    9.28
  -8  -5  -1   69.83    7.89
  -8   5  -2   62.72    8.82
  -8  -5  -2   70.24    7.82
   8  -5   3   61.57    7.28
  -8  -5  -3   64.58    7.25
   8   5   4   56.13    8.27
   8  -5   4   48.29    6.31
  -8  -5  -4   48.89    6.42
   8   5   5   24.96    5.16
   8   5   5   25.00    5.68
   8  -5   5   30.05    5.04
  -8  -5  -5   23.53    4.56
  -8   5  -6  489.61   26.45
   8   5   6  528.99   25.80
  -8  -5  -6  546.21   22.47
   8  -5   6  550.40   22.76
   8   5   6  480.10   22.82
  -8   5  -7   67.40    9.48
   8   5   7   91.60   10.25
  -8  -5  -7   81.32    7.90
   8  -5   7   69.04    7.56
   8   5   7   62.43    7.61
   8   5   8  176.92   14.28
  -8  -5  -8  183.30   11.84
   8  -5   8  188.93   12.03
   8   5   8  153.48   11.85
   8   5   9    3.36    2.45
   8   5   9    1.12    2.53
   8  -5   9   -0.72    1.89
  -8  -5  -9   -0.72    2.49
   8   5  10    0.82    1.85
   8  -5  10    1.40    1.58
  -8  -5 -10    2.11    1.84
   8   5  11   15.16    3.84
   8  -5  11    8.88    2.83
   8  -5  12  121.78    9.19
   8   5  12  108.69    9.38
   8   5  13   19.50    4.18
   8  -5  13   18.09    3.80
   8  -5  14  446.73   18.37
   8   5  14  408.92   18.79
   8   5  15   46.14    5.78
  -8   6  16   11.44    3.78
  -8   6  15   40.41    6.11
  -8   6  14  189.93   13.49
  -8   6  13   38.01    6.17
  -8   6  12   29.66    5.76
   8  -6 -11   20.08    4.86
  -8   6  11   18.68    4.91
   8  -6 -10  102.38   10.00
  -8   6  10  143.80   12.25
   8  -6  -9  177.98   12.78
  -8   6   9  165.83   13.31
   8  -6  -8  208.95   13.77
  -8   6   8  251.97   16.58
   8  -6  -7   40.04    5.92
  -8   6   7   28.81    6.10
   8  -6  -6  165.70   11.66
  -8   6   6  224.81   16.13
   8  -6  -5    3.62    2.92
  -8   6   5    6.94    4.41
   8  -6  -4  473.19   19.87
  -8  -6   1   40.36    6.90
  -8  -6   0    2.98    3.04
   8  -6   1  110.69   10.83
  -8  -6  -1  125.96   11.37
  -8  -6  -2  491.27   23.23
   8  -6   2  466.55   22.88
   8  -6   3    2.88    2.81
  -8  -6  -3    1.90    2.77
   8  -6   4   59.87    7.76
  -8  -6  -4   57.99    7.39
   8  -6   5   51.75    7.15
  -8  -6  -5   52.48    7.20
   8  -6   6   17.54    4.38
  -8  -6  -6   33.54    5.76
   8  -6   7  155.61   12.13
  -8  -6  -7  179.51   12.90
   8   6   7  159.26   12.76
   8  -6   8  142.70   11.44
   8   6   8  136.95   11.47
   8   6   9   24.15    4.92
   8  -6   9   24.86    4.91
   8  -6  10   79.23    8.41
   8   6  10   78.06    8.42
   8   6  11    0.84    1.90
   8  -6  11   -0.83    2.29
   9   0 -24    0.85    2.49
   9   0 -23  274.47   15.97
   9   0 -21   80.61    9.96
   9   0 -21   85.29    8.91
   9   0 -20   -1.15    2.38
   9   0 -20    1.80    2.50
   9   0 -19  459.26   23.46
   9   0 -19  393.95   20.17
   9   0 -18   -1.09    2.84
   9   0 -18    1.85    2.83
   9   0 -17  167.85   13.37
   9   0 -17  156.10   13.04
   9   0 -17  145.84   11.78
   9   0 -16   -1.02    2.49
   9   0 -16    0.94    2.30
   9   0 -16    1.07    2.80
   9   0 -15  503.51   23.98
   9   0 -15  542.16   25.10
   9   0 -15  508.62   23.62
   9   0 -14   -0.96    2.34
   9   0 -14    4.73    2.90
   9   0 -14    1.01    2.08
   9   0 -13   13.81    4.18
   9   0 -13   13.19    4.00
   9   0 -13   19.49    4.51
   9   0 -12   -0.94    1.94
   9   0 -12    0.94    1.95
   9   0 -11  290.36   16.95
   9   0 -11  304.89   17.17
   9   0 -10    1.85    2.41
   9   0 -10   -0.88    2.29
   9   0  -9 2201.07   64.77
   9   0  -9 2316.18   64.29
   9   0  -8   -1.82    2.22
   9   0  -8   -0.80    1.66
  -9   0   7  224.22   12.53
   9   0  -7  184.09   13.16
   9   0  -7  215.62   12.98
   9   0  -6    0.89    1.85
  -9   0   6    0.66    1.73
   9   0  -6    0.72    1.50
  -9   0   5  408.02   17.67
   9   0  -5  364.30   17.11
   9   0  -5  358.82   18.97
   9   0  -4   -0.88    2.00
  -9   0   4   -0.65    1.71
   9   0  -4   -0.64    1.78
  -9   0   3 1519.86   44.52
   9   0  -3 1568.25   48.17
   9   0  -3 1504.11   43.70
   9   0  -2    2.62    2.28
  -9   0   2    2.64    2.19
   9   0  -2   -0.56    1.37
   9   0  -1 1046.40   36.76
  -9   0   1 1047.14   34.07
   9   0  -1 1121.83   32.64
  -9   0   0   -0.66    1.94
   9   0   0    0.48    1.32
  -9   0  -1 1232.30   37.82
   9   0   1 1217.25   34.23
  -9   0  -2    0.68    1.97
   9   0   2    2.72    1.44
   9   0   3  153.06   11.42
   9   0   3  139.68    7.24
   9   0   4    0.85    1.92
   9   0   4    0.29    1.04
   9   0   5  373.20   18.64
   9   0   5  368.05   11.81
  -9   0  -5  343.43   18.64
  -9   0  -6    0.90    2.04
   9   0   6    0.18    0.64
   9   0   7  661.46   20.23
  -9   0  -7  625.05   25.50
   9   0   8    1.39    1.48
  -9   0  -8   -0.92    2.41
   9   0   9    4.89    1.65
  -9   0  -9    8.40    3.23
   9   0  10   -0.43    1.05
  -9   0 -10   -0.94    2.13
   9   0  11   57.34    4.97
  -9   0 -11   66.40    7.94
   9   0  12   -0.40    1.35
  -9   0 -12   -0.95    1.76
   9   0  13  935.78   27.04
  -9   0 -13  905.99   34.36
   9   0  14   -0.77    2.00
  -9   0 -14   -1.89    2.47
   9   0  15 1432.32   38.22
  -9   0 -15 1468.70   46.99
   9   0  16    0.74    1.71
  -9   0 -16    3.72    3.09
  -9   0 -17  194.56   13.48
  -9   0 -18   -0.91    2.53
   9   1 -25    6.52    3.44
   9   1 -24  249.85   15.88
   9  -1 -23   47.87    6.48
   9   1 -23   48.04    6.90
   9  -1 -22    0.85    2.21
   9   1 -22    3.90    2.85
   9  -1 -21  109.21    9.88
   9   1 -21  121.56   11.80
   9   1 -21  142.77   11.91
   9  -1 -20   -1.21    2.73
   9   1 -20    1.10    3.05
   9  -1 -20   -0.86    2.11
   9   1 -20    1.00    2.43
   9  -1 -19  413.74   22.98
   9  -1 -19  381.53   19.73
   9   1 -19  451.09   22.86
   9   1 -19  449.59   22.24
   9   1 -18  311.24   18.20
   9  -1 -18  270.25   15.96
   9  -1 -18  285.47   18.35
   9   1 -18  286.49   17.28
   9  -1 -17    6.69    3.99
   9  -1 -17    3.57    2.86
   9   1 -17   -1.00    2.44
   9   1 -17    1.01    2.29
   9  -1 -17    1.10    2.27
   9   1 -17    6.87    3.35
   9   1 -16  393.97   20.42
   9  -1 -16  381.41   19.53
   9  -1 -16  402.95   21.66
   9   1 -16  398.09   21.84
   9  -1 -16  383.67   21.00
   9   1 -16  382.32   20.60
   9   1 -15  178.65   13.04
   9  -1 -15  160.41   12.26
   9   1 -15  175.53   13.98
   9  -1 -15  158.87   12.96
   9   1 -15  206.57   14.28
   9   1 -14   60.93    7.49
   9  -1 -14   66.68    7.90
   9  -1 -14   70.04    8.61
   9   1 -14   73.41    8.58
   9   1 -14   54.72    7.90
   9   1 -13 1017.57   35.94
   9  -1 -13 1003.70   36.38
   9   1 -13 1123.98   39.02
   9  -1 -13 1058.28   37.89
   9   1 -13  974.70   37.01
   9   1 -12   14.00    3.67
   9  -1 -12   18.29    4.32
   9   1 -12   13.87    4.01
   9  -1 -12   16.20    4.42
   9   1 -12   21.47    4.78
   9   1 -11   35.42    5.39
   9  -1 -11   29.23    5.51
   9   1 -11   28.52    5.57
   9  -1 -11   35.95    5.82
   9   1 -11   34.71    5.73
   9  -1 -10   76.50    8.29
   9   1 -10   59.25    7.48
   9  -1 -10   77.43    8.19
   9   1 -10   67.24    8.04
   9  -1  -9   47.21    6.61
   9   1  -9   37.54    6.22
  -9   1   9   43.24    5.90
   9  -1  -9   40.35    6.00
   9   1  -9   35.20    5.56
  -9   1   8  580.71   24.04
   9  -1  -8  597.74   25.67
   9   1  -8  631.42   25.26
   9  -1  -8  600.55   25.03
   9   1  -8  646.06   26.94
  -9   1   7  658.93   25.81
   9  -1  -7  639.87   27.08
   9   1  -7  670.60   26.11
   9  -1  -7  700.85   26.66
   9   1  -7  704.51   28.39
   9  -1  -6    2.70    2.76
  -9   1   6    6.11    2.73
   9   1  -6    5.57    2.85
   9   1  -6    3.67    2.25
   9  -1  -6    2.28    2.23
   9  -1  -5 1374.38   44.49
  -9   1   5 1304.32   41.92
   9   1  -5 1375.80   41.32
   9   1  -5 1358.27   44.65
   9  -1  -5 1378.90   41.95
   9  -1  -4    8.03    3.40
  -9   1   4   13.07    3.55
   9   1  -4    8.14    3.02
   9   1  -4    6.51    2.48
   9  -1  -4    4.14    2.56
  -9  -1   3  570.32   20.46
   9  -1  -3  526.48   23.79
  -9   1   3  592.63   23.55
   9   1  -3  562.52   21.26
   9  -1  -3  514.91   21.06
   9   1  -3  577.83   24.78
  -9   1   2  790.23   28.86
  -9  -1   2  795.39   25.83
   9  -1  -2  752.97   29.70
   9   1  -2  761.66   25.83
   9  -1  -2  793.63   26.74
  -9   1   1  102.11    8.94
  -9  -1   1  102.45    7.44
   9   1  -1   97.28    7.19
   9  -1  -1   99.75    7.52
  -9   1   1  103.34    9.43
  -9   1   0   73.55    7.58
  -9  -1   0   62.10    5.81
   9   1   0   64.13    5.53
   9  -1   0   63.06    5.78
  -9   1   0   73.27    7.90
   9   1   1   44.14    6.39
  -9   1  -1   38.03    5.68
  -9  -1  -1   42.69    4.84
  -9   1  -1   44.08    5.93
   9   1   1   43.85    4.45
   9  -1   1   43.02    4.63
   9   1   2   32.86    5.31
  -9  -1  -2   28.44    4.10
  -9   1  -2   24.15    4.86
   9   1   2   25.62    3.44
   9  -1   2   31.61    3.82
  -9  -1  -3 1032.67   30.92
   9   1   3  949.35   27.67
   9   1   3 1029.21   35.19
  -9   1  -3  996.46   35.68
   9  -1   3  973.11   28.40
  -9  -1  -4  388.84   16.45
   9   1   4  424.14   14.21
   9   1   4  400.57   19.61
  -9   1  -4  390.09   20.07
   9  -1   4  410.02   14.43
   9   1   5    9.16    3.08
  -9   1  -5    5.60    2.73
  -9  -1  -5   10.10    2.80
   9   1   5    8.74    1.76
   9  -1   5    7.89    1.76
   9   1   6  467.37   21.71
   9   1   6  493.85   14.51
   9  -1   6  516.73   15.28
   9  -1   7    1.27    1.17
   9   1   7    1.88    1.53
   9   1   7    2.47    2.40
  -9   1  -7    1.93    3.21
   9  -1   7    2.58    1.01
   9   1   8  399.50   19.42
   9  -1   8  453.65   13.82
   9   1   8  451.45   17.98
   9  -1   8  385.45   10.43
   9  -1   8  394.20   10.48
  -9   1  -8  448.00   21.82
   9  -1   9 1431.84   35.51
   9   1   9 1399.74   41.24
   9   1   9 1447.27   44.87
  -9   1  -9 1396.16   46.99
   9   1  10   93.27    7.55
   9  -1  10  100.54    4.95
   9   1  11  302.73   14.32
   9  -1  11  305.62    9.73
  -9   1 -11  333.22   18.84
   9   1  12   33.20    4.49
   9  -1  12   30.57    2.32
  -9   1 -12   29.74    5.64
   9   1  13  102.95    7.84
  -9   1 -13  122.16   11.15
   9   1  14  155.87    9.78
  -9   1 -14  181.67   13.77
   9   1  15  143.78    9.28
  -9   1 -15  123.60   11.39
   9   1  16   27.39    4.18
  -9   1 -16   37.63    6.34
   9   1  17  429.37   17.40
  -9   1 -17  399.42   21.22
   9   1  18    3.36    2.25
  -9   1 -18    1.00    2.61
   9   1  19  588.31   21.33
  -9   1 -19  581.41   26.05
  -9   1 -20  216.18   14.81
  -9   1 -21    4.79    3.07
  -9   1 -22  111.58   10.36
   9   2 -24   19.27    5.06
   9   2 -23    1.08    2.23
   9   2 -22  226.10   15.89
   9   2 -21    6.59    3.21
   9   2 -21    5.43    3.01
   9   2 -20  506.73   24.76
   9   2 -20  508.97   25.02
   9   2 -19   39.17    6.74
   9   2 -19   50.24    7.46
   9   2 -18   92.04    9.61
   9   2 -18   89.16   10.03
   9   2 -17   11.44    3.75
   9   2 -17   19.49    5.01
   9   2 -17   13.25    4.32
   9  -2 -17   13.89    4.29
   9   2 -16    1.83    2.23
   9   2 -16    1.08    2.44
   9   2 -16    1.17    2.41
   9  -2 -16    2.27    2.57
   9   2 -15   48.18    6.64
   9   2 -15   36.49    6.49
   9   2 -15   43.98    7.20
   9  -2 -15   42.34    7.19
   9   2 -14  900.80   32.61
   9   2 -14  899.33   35.52
   9   2 -14  921.70   35.50
   9  -2 -14  907.75   35.73
   9   2 -13   12.59    4.56
   9   2 -13   16.86    4.01
   9   2 -13   14.74    4.25
   9  -2 -13   16.02    4.31
   9   2 -12  269.41   14.83
   9   2 -12  256.71   16.37
   9   2 -12  284.90   17.38
   9  -2 -12  264.16   16.84
   9   2 -11    0.72    1.50
   9   2 -11    1.02    2.12
  -9   2  11   -0.87    2.78
   9   2 -11   -0.98    2.21
  -9   2  10  605.33   25.49
   9   2 -10  605.90   23.39
   9   2 -10  648.89   26.84
   9   2 -10  611.09   27.02
  -9   2  10  577.36   24.63
  -9   2   9  239.82   14.62
   9   2  -9  229.62   14.76
  -9   2   9  241.39   14.44
   9   2  -9  229.35   15.31
  -9   2   8  206.76   13.42
   9   2  -8  181.04   12.64
  -9   2   8  203.72   13.28
   9   2  -8  179.73   13.43
  -9   2   7   38.06    5.93
  -9   2   7   39.29    5.86
   9   2  -7   49.83    6.86
   9   2  -7   30.95    5.17
  -9   2   6  137.66   11.01
   9   2  -6  149.73   10.68
  -9   2   6  148.93   11.46
   9   2  -6  141.06   11.79
  -9  -2   6  149.97   11.05
  -9   2   5    5.24    3.02
   9   2  -5    6.67    3.05
  -9   2   5    5.25    2.68
   9   2  -5    2.95    1.93
  -9  -2   5    3.82    2.45
  -9   2   4 1135.32   38.80
   9   2  -4 1155.37   36.70
  -9   2   4 1160.90   39.27
  -9  -2   4 1156.77   37.20
  -9   2   3   15.87    4.01
   9   2  -3   15.90    3.53
  -9  -2   3   20.45    3.82
  -9   2   2    3.55    2.46
   9   2  -2    6.88    2.38
  -9  -2   2    2.01    1.64
  -9   2   1  228.79   14.50
   9   2  -1  241.93   12.38
  -9  -2   1  219.93   12.35
   9   2  -1  218.22   14.33
  -9   2   0  481.44   22.63
   9   2   0  531.46   19.64
  -9  -2   0  500.33   19.85
   9   2   0  531.96   23.61
  -9   2  -1   53.37    7.16
   9   2   1   59.99    5.59
  -9  -2  -1   62.39    5.93
   9   2   1   61.36    7.50
  -9  -2  -2 1464.37   38.93
   9   2   2 1489.57   40.97
  -9   2  -2 1544.01   48.69
   9   2   2 1508.44   47.25
  -9  -2  -3   53.49    4.46
  -9   2  -3   51.95    7.21
   9   2   3   42.45    6.24
   9   2   3   44.39    4.60
  -9  -2  -4 1047.90   29.34
   9   2   4 1047.01   29.95
  -9   2  -4 1018.04   37.62
   9   2   4 1089.91   36.80
  -9  -2  -5   87.40    5.95
   9   2   5  105.29    6.34
  -9   2  -5   90.85    9.54
   9   2   5   80.79    8.43
   9  -2   6  106.73    4.46
  -9  -2  -6  111.41    6.77
   9   2   6   88.94    8.75
  -9   2  -6  109.69   10.41
  -9  -2  -7   64.09    5.21
  -9   2  -7   53.04    7.51
   9   2   7   61.33    6.97
   9  -2   7   67.67    4.76
   9   2   7   64.41    7.44
  -9  -2  -8  314.08   13.02
   9   2   8  344.08   16.88
   9  -2   8  324.51   11.62
  -9   2  -8  314.39   18.75
   9   2   8  343.92   17.57
   9   2   9   20.49    4.45
  -9   2  -9   34.21    6.35
   9   2   9   28.28    4.94
   9  -2   9   28.61    2.65
   9  -2   9   25.71    2.69
   9   2  10  409.05   19.16
   9   2  10  426.39   18.94
   9  -2  10  399.64   11.49
   9  -2  10  361.36   11.36
  -9   2 -10  405.41   21.66
   9   2  11   25.58    4.97
  -9   2 -11   16.45    4.77
   9   2  11   27.31    4.54
   9  -2  11   18.21    1.35
   9  -2  11   15.57    1.29
   9   2  12  583.91   23.43
   9   2  12  610.61   24.44
  -9   2 -12  580.26   27.33
   9   2  13   91.08    8.15
   9   2  13   92.59    8.57
  -9   2 -13   87.83    9.99
   9   2  14   42.99    5.71
  -9   2 -14   44.59    7.34
   9   2  15   39.30    5.52
  -9   2 -15   35.69    6.65
   9   2  16  153.99   10.66
  -9   2 -16  145.11   12.83
   9   2  17    1.44    2.40
  -9   2 -17    1.11    2.72
   9   2  18  783.81   27.97
  -9   2 -18  748.18   31.97
   9   2  19    9.42    3.00
  -9   2 -19   14.31    4.55
   9   2  20   64.32    7.13
  -9   2 -20  100.36   10.65
   9   2  21  132.74   10.01
  -9   2 -21  120.96   11.53
  -9   2 -22    5.33    3.11
   9   3 -21   15.76    4.57
   9   3 -20    7.12    3.76
   9   3 -19   42.29    6.61
   9   3 -18  276.04   16.69
   9   3 -18  292.39   19.86
   9  -3 -18  293.47   18.57
   9   3 -17   21.00    4.80
   9  -3 -17   22.38    5.41
   9   3 -17   21.64    5.90
   9   3 -16  350.19   18.52
   9  -3 -16  396.28   20.87
   9   3 -16  383.65   22.41
  -9  -3  16  366.33   21.00
   9   3 -15    1.67    2.31
   9  -3 -15    2.95    2.87
   9   3 -15   -1.20    2.94
  -9  -3  15    1.08    2.83
   9   3 -14  251.43   14.36
   9  -3 -14  253.88   15.67
   9   3 -14  255.55   17.29
   9   3 -13    0.75    1.84
  -9   3  13   -0.82    1.70
   9  -3 -13    0.91    2.05
   9   3 -13   -1.13    2.56
  -9  -3  13   -1.02    2.50
  -9   3  12   12.63    3.74
  -9   3  12   12.40    3.64
   9   3 -12    9.96    3.02
   9  -3 -12    9.56    3.12
   9   3 -12   12.02    4.17
  -9  -3  12   13.89    4.40
  -9   3  11    1.91    2.50
   9   3 -11    8.05    2.71
  -9   3  11    9.43    3.36
   9  -3 -11    4.99    2.88
   9   3 -11    8.43    3.38
  -9  -3  11    8.66    3.33
  -9   3  10  246.10   15.81
   9   3 -10  277.33   13.88
   9  -3 -10  268.60   15.16
   9   3 -10  289.49   17.55
  -9  -3  10  263.68   16.11
  -9   3  10  286.09   16.18
  -9   3   9    5.74    3.06
  -9   3   9    0.89    2.18
   9  -3  -9    3.78    2.42
   9   3  -9    2.94    1.88
   9   3  -9    1.95    2.21
  -9  -3   9    3.63    2.65
  -9   3   8  668.05   28.34
   9  -3  -8  709.10   26.00
   9   3  -8  684.69   28.40
  -9  -3   8  704.59   27.92
  -9   3   8  683.09   27.86
  -9   3   7   30.01    5.77
   9   3  -7   28.98    5.62
  -9   3   7   41.57    6.20
   9  -3  -7   40.34    5.28
   9   3  -7   23.25    5.01
  -9  -3   7   41.73    6.19
  -9   3   6   16.93    4.27
  -9   3   6   17.47    4.31
   9  -3  -6   14.48    3.20
   9   3  -6    7.71    3.08
  -9  -3   6   14.83    4.04
  -9   3   5  301.42   17.32
   9  -3  -5  267.96   13.33
   9   3  -5  283.33   15.57
  -9   3   5  270.68   16.52
  -9  -3   5  252.91   14.85
  -9   3   4   19.65    4.56
  -9   3   4   13.62    4.24
   9  -3  -4   27.36    4.01
   9   3  -4   21.80    4.40
  -9  -3   4   22.39    4.30
  -9   3   3  216.77   14.88
   9  -3  -3  244.10   11.70
   9   3  -3  245.85   13.79
  -9  -3   3  244.32   13.84
   9   3  -3  201.52   14.59
  -9   3   3  221.63   15.04
  -9   3   2 1529.25   49.54
   9   3  -2 1554.39   45.57
  -9  -3   2 1467.67   45.08
   9   3  -2 1568.61   49.85
  -9   3   2 1547.37   49.75
  -9   3   1   21.05    4.74
   9   3  -1   22.02    5.10
   9   3  -1   20.47    4.06
  -9  -3   1   17.32    3.81
  -9   3   0  282.61   17.41
   9  -3   0  327.15   12.48
   9   3   0  332.48   15.71
   9   3   0  324.98   18.19
  -9  -3   0  318.35   15.50
   9   3   1   13.08    3.77
   9  -3   1    5.82    1.62
   9   3   1    6.90    2.66
  -9  -3  -1    7.66    2.64
   9  -3   2  263.11    9.74
   9   3   2  245.78   12.79
  -9   3  -2  245.16   16.38
   9   3   2  279.27   16.29
  -9  -3  -2  258.11   13.15
   9  -3   3  143.16    6.06
   9   3   3  139.40    8.94
  -9   3  -3  134.85   12.09
   9   3   3  151.08   11.75
  -9  -3  -3  142.24    9.29
   9  -3   4  380.83   10.66
   9   3   4  398.69   15.97
  -9   3  -4  384.49   21.31
   9   3   4  445.19   20.87
  -9  -3  -4  415.38   16.67
   9   3   5   -1.85    2.26
  -9   3  -5   -1.10    2.49
   9   3   5   -0.89    2.01
  -9  -3  -5    1.57    1.45
   9   3   6  504.44   23.11
   9  -3   6  523.08   18.58
   9   3   6  465.58   22.14
  -9   3  -6  518.55   25.35
  -9  -3  -6  488.09   18.20
  -9   3  -7    3.40    3.14
   9   3   7    4.31    2.64
   9   3   7    0.91    2.37
   9  -3   7    3.26    1.72
  -9  -3  -7    7.72    2.18
   9   3   8 1086.94   37.61
  -9  -3  -8 1064.24   30.52
   9   3   8 1110.47   37.14
  -9   3  -8 1045.35   40.24
   9   3   9   24.85    5.00
  -9   3  -9   12.81    4.45
   9   3   9   14.11    3.78
  -9  -3  -9   20.66    2.97
   9   3  10    2.46    1.86
  -9   3 -10    2.36    2.88
  -9  -3 -10    2.72    0.84
  -9  -3 -10    2.96    1.36
  -9   3 -11   42.94    7.39
  -9  -3 -11   54.21    3.33
   9   3  11   44.88    6.34
   9  -3  11   48.19    4.18
  -9  -3 -11   49.51    3.90
   9   3  11   57.62    6.88
  -9   3 -12   48.16    7.78
  -9  -3 -12   48.57    3.45
   9   3  12   37.55    5.96
   9  -3  12   48.10    3.99
   9   3  13  136.17   10.58
   9   3  13  153.44   11.77
   9  -3  13  146.00    6.61
  -9   3 -13  156.24   13.70
   9   3  14 1140.55   37.67
   9   3  14 1170.28   39.40
   9  -3  14 1162.08   28.86
  -9   3 -14 1180.20   43.83
   9   3  15   18.31    4.35
  -9   3 -15   28.08    6.49
   9   3  15   27.56    4.73
   9  -3  15   15.06    1.51
   9   3  16   40.13    6.20
  -9   3 -16   41.64    7.47
   9   3  17   93.81    9.16
   9   3  18  139.50   11.27
   9   3  19   36.40    5.94
   9   3  20  323.17   17.78
   9   4 -20  348.83   19.44
   9   4 -19  169.68   12.93
   9   4 -18   -0.90    3.91
   9   4 -17   96.36    9.38
   9  -4 -16   34.17    6.50
   9   4 -16   29.06    5.19
   9  -4 -15  141.14   12.44
   9   4 -15  168.81   11.75
  -9   4  15  145.02   10.99
   9   4 -14  125.84    9.91
   9  -4 -14  144.47   12.04
   9   4 -14  116.29   12.38
  -9   4  14  133.79   10.96
   9   4 -13    0.70    1.58
  -9   4  13    2.63    2.14
   9  -4 -13    2.84    2.62
   9   4 -13    2.42    2.50
  -9  -4  13   -1.07    2.61
   9   4 -12   37.54    5.14
  -9   4  12   44.94    6.50
   9  -4 -12   48.73    6.94
   9   4 -12   43.43    7.17
  -9  -4  12   52.16    7.53
   9   4 -11  200.03   11.21
   9  -4 -11  175.23   12.53
   9   4 -11  165.69   13.85
  -9  -4  11  145.05   12.50
  -9   4  11  201.05   13.69
   9   4 -10    3.96    2.03
  -9   4  10    5.68    3.50
   9  -4 -10    2.45    2.38
   9   4 -10    4.39    3.21
  -9  -4  10    3.99    3.19
   9  -4  -9  447.21   20.12
   9   4  -9  461.42   23.33
  -9   4   9  455.88   22.34
  -9  -4   9  464.12   22.54
   9  -4  -8  142.05   10.47
   9   4  -8  169.41   13.29
  -9   4   8  157.39   12.58
  -9  -4   8  182.26   13.11
   9  -4  -7  264.59   14.19
   9   4  -7  271.94   16.74
  -9   4   7  283.21   17.30
  -9  -4   7  279.42   16.50
   9  -4  -6  268.05   13.58
   9   4  -6  246.89   15.68
  -9   4   6  236.94   15.77
  -9  -4   6  234.64   15.04
  -9   4   5   16.70    4.73
   9  -4  -5   13.24    3.35
   9   4  -5   13.87    4.02
  -9  -4   5   15.91    4.09
  -9   4   4  325.02   19.08
   9  -4  -4  308.31   14.07
   9   4  -4  286.94   16.62
  -9  -4   4  276.73   16.15
  -9   4   4  300.29   18.23
  -9   4   3  231.97   15.90
   9  -4  -3  219.38   11.25
   9   4  -3  205.05   13.59
  -9   4   3  238.72   16.12
  -9  -4   3  227.69   14.23
  -9   4   2    5.47    3.03
  -9   4   2    3.30    3.05
   9  -4  -2    1.42    1.52
   9   4  -2    5.82    2.87
  -9  -4   2    8.93    3.36
  -9   4   1  414.21   22.51
   9   4  -1  453.30   20.40
   9   4  -1  446.47   22.70
  -9   4   1  441.49   23.18
  -9  -4   1  460.23   20.64
  -9   4   0    9.03    3.62
   9   4   0   14.10    4.66
   9  -4   0    8.65    2.07
  -9   4   0    7.81    3.58
   9   4   0   12.94    3.73
  -9  -4   0   11.50    3.55
   9  -4   1  410.07   13.84
   9   4   1  395.83   18.29
   9   4   1  366.88   20.23
  -9  -4  -1  408.03   18.74
   9  -4   2  635.74   18.25
   9   4   2  672.23   28.05
  -9  -4  -2  668.97   25.08
   9   4   3   47.20    7.03
  -9  -4  -3   52.29    6.21
   9   4   4   22.51    5.17
  -9   4  -4   18.08    5.12
   9   4   4   26.64    5.36
  -9  -4  -4   18.84    3.76
   9   4   5   91.44   10.01
   9  -4   5  102.01    8.23
  -9   4  -5   95.23   10.80
   9   4   5  116.56   10.42
  -9  -4  -5   94.96    7.97
  -9   4  -6   17.28    4.85
   9   4   6   10.08    3.40
   9   4   6   10.49    3.76
   9  -4   6   10.76    2.88
  -9  -4  -6   15.01    3.33
  -9   4  -7  299.86   19.76
   9   4   7  303.10   18.44
   9  -4   7  312.62   14.82
  -9  -4  -7  325.56   14.99
   9   4   7  335.13   18.20
  -9   4  -8  176.90   15.01
   9   4   8  160.91   12.97
   9  -4   8  168.62   10.26
  -9  -4  -8  160.64    9.88
   9   4   8  169.62   12.44
  -9   4  -9  320.54   20.51
   9   4   9  336.54   19.10
   9  -4   9  313.76   14.48
   9   4   9  329.14   17.68
  -9  -4  -9  331.05   14.69
  -9   4 -10  175.77   15.10
   9   4  10  174.84   13.51
   9  -4  10  191.25   10.43
   9   4  10  190.22   13.05
  -9  -4 -10  181.57   10.06
   9   4  11   65.13    8.45
   9  -4  11   83.25    6.63
   9   4  11   67.37    7.58
   9   4  12  180.42   13.71
   9  -4  12  189.27    9.91
   9   4  12  166.31   11.92
   9   4  13  199.13   14.39
   9  -4  13  199.88   10.03
   9   4  13  199.09   12.99
   9   4  14    0.78    1.91
   9  -4  14    0.42    1.53
   9   4  14    1.01    3.10
   9   4  15  340.93   17.08
   9   4  16   49.34    6.20
  -9   5  17   20.08    4.35
  -9   5  16   20.18    4.42
   9   5 -15   93.57    8.36
  -9   5  15   84.76    8.76
   9   5 -14    6.84    2.97
  -9   5  14    3.61    2.64
   9  -5 -13  517.18   24.53
   9   5 -13  544.41   21.20
  -9   5  13  525.45   24.06
   9  -5 -12   28.24    5.74
   9   5 -12   30.55    4.55
  -9   5  12   28.99    5.75
   9  -5 -11  175.33   12.69
   9   5 -11  167.59    9.89
  -9   5  11  164.67   13.05
   9  -5 -10    0.86    2.37
  -9   5  10   -1.02    2.82
   9  -5  -9   71.59    7.76
   9   5  -9   54.49    8.39
  -9   5   9   76.02    8.78
  -9   5   8    1.06    2.78
   9  -5  -8    4.62    2.85
   9   5  -8    4.60    3.01
  -9  -5   8    6.26    3.47
   9  -5  -7  247.20   14.10
   9   5  -7  269.63   17.53
  -9  -5   7  285.79   17.39
  -9   5   7  256.64   17.06
  -9   5   6   52.98    7.86
  -9   5   6   39.77    6.97
   9  -5  -6   39.71    5.47
   9   5  -6   38.49    6.89
  -9  -5   6   30.00    5.68
  -9   5   5  322.38   19.75
   9  -5  -5  308.33   15.17
   9   5  -5  342.41   19.37
  -9   5   5  326.99   19.72
  -9  -5   5  358.07   19.38
  -9   5   4    3.46    3.37
  -9   5   4    5.88    3.77
   9  -5  -4    2.41    1.93
   9   5  -4    1.99    2.61
  -9  -5   4    5.75    3.07
  -9   5   3  387.26   22.27
   9  -5  -3  404.49   16.80
   9   5  -3  415.50   21.00
  -9   5   3  447.03   23.64
  -9  -5   3  423.42   21.01
  -9   5   2    5.99    3.32
   9  -5  -2    3.04    1.88
   9   5  -2    6.57    3.13
  -9  -5   2    4.59    2.69
   9  -5  -1   47.94    4.75
  -9   5   1   31.73    6.44
  -9  -5   1   42.31    6.29
  -9   5   0   17.39    5.13
  -9  -5   0    0.88    2.44
   9   5   1  233.82   17.09
  -9   5  -1  231.34   17.31
  -9  -5  -1  240.61   14.77
   9   5   2   18.29    5.41
   9   5   2    9.49    3.78
  -9  -5  -2   16.84    4.41
   9  -5   3  672.91   26.64
   9   5   3  639.43   28.60
  -9  -5  -3  683.37   26.76
   9   5   4    3.03    3.23
   9  -5   4    1.62    2.24
  -9  -5  -4   -0.80    2.10
   9  -5   5   79.96    8.27
   9   5   5   83.15    9.23
  -9  -5  -5   84.71    8.29
   9   5   6   -0.97    2.19
   9  -5   6    1.56    2.27
  -9  -5  -6    2.30    2.24
   9   5   7   11.37    3.92
   9  -5   7   12.95    3.45
  -9  -5  -7    7.47    3.10
   9   5   8   28.73    5.52
   9  -5   8   31.55    4.93
   9  -5   9  522.55   21.37
   9   5   9  490.26   23.01
   9  -5  10   71.43    7.17
   9   5  10   73.70    8.43
   9  -5  11   75.07    7.21
   9   5  11   70.17    7.88
   9   5  12   20.99    4.54
   9   5  13  213.89   13.64
   9  -6 -10   68.71    8.10
   9  -6  -9  335.86   18.02
   9  -6  -8   16.34    4.08
   9  -6  -7   31.19    5.04
   9  -6  -6   58.27    6.65
   9  -6  -5    2.09    2.23
  -9  -6  -2   12.62    4.21
  -9  -6  -3  115.36   10.79
  -9  -6  -4  132.25   11.49
   9  -6   7  203.55   13.78
   9  -6   8   15.59    4.17
  10   0 -24    8.46    3.26
  10   0 -23   -1.90    3.05
  10   0 -22  310.46   17.90
  10   0 -21    0.98    2.22
  10   0 -20  220.02   15.10
  10   0 -19   -1.01    2.08
  10   0 -19    2.36    2.67
  10   0 -19   -1.22    3.37
  10   0 -18  387.26   21.96
  10   0 -18  420.96   21.56
  10   0 -18  378.79   22.04
  10   0 -17   -1.12    2.31
  10   0 -17    1.03    2.52
  10   0 -17   -2.31    2.83
  10   0 -16   70.03    8.88
  10   0 -16   70.87    9.03
  10   0 -16   86.38    9.51
  10   0 -15    1.05    2.90
  10   0 -15    1.09    2.48
  10   0 -14  263.31   16.99
  10   0 -14  296.55   17.96
  10   0 -13   -1.04    2.89
  10   0 -13    1.03    2.52
  10   0 -12 1633.35   53.04
  10   0 -12 1701.30   53.16
  10   0 -11    1.03    2.87
  10   0 -11    0.97    2.52
  10   0 -10  829.89   32.11
  10   0 -10  872.08   33.88
  10   0  -9    1.02    2.50
  10   0  -9    0.89    2.17
  10   0  -8    1.01    2.48
  10   0  -8   20.30    4.28
  10   0  -7    6.04    3.36
  10   0  -7    0.81    2.11
 -10   0   6  727.61   26.43
  10   0  -6  683.44   29.11
  10   0  -6  678.49   26.33
 -10   0   5    0.72    1.87
  10   0  -5    1.00    2.26
  10   0  -5   -0.73    1.78
  10   0  -4  991.46   36.60
 -10   0   4  971.57   33.03
  10   0  -4 1025.99   33.06
  10   0  -3   -0.98    1.80
 -10   0   3    0.71    1.75
  10   0  -3   -0.64    1.57
  10   0  -2  219.58   14.65
 -10   0   2  233.66   13.30
  10   0  -2  223.12   12.04
  10   0  -1    0.96    3.07
 -10   0   1    0.72    1.77
  10   0  -1    0.56    1.26
 -10   0   0  332.41   16.45
  10   0   0  349.11   14.74
 -10   0  -1    0.73    2.04
  10   0   1    1.86    1.36
 -10   0  -2  453.15   20.01
  10   0   2  446.23   16.15
  10   0   3    1.88    2.46
 -10   0  -3   -0.75    2.30
  10   0   3    0.37    1.31
  10   0   4 2161.52   62.93
 -10   0  -4 2112.35   59.67
  10   0   4 2149.23   52.31
  10   0   5    1.30    1.18
  10   0   6   49.39    3.18
  10   0   7    0.53    1.54
  10   0   8    9.06    2.33
  10   0   9    1.45    1.72
  10   0  10 1222.51   34.63
  10   0  11    1.78    1.70
  10   0  12  921.61   27.38
  10   0  13    2.04    1.56
  10   0  14  117.53    7.07
  10   0  15   -0.38    1.27
  10   0  16  168.50    8.36
  10   1 -23   39.54    6.85
  10  -1 -22   42.00    6.73
  10   1 -22   33.85    6.31
  10  -1 -21   64.25    7.85
  10   1 -21   77.14    9.30
  10   1 -20   25.63    6.01
  10  -1 -20   16.28    4.27
  10   1 -20   21.67    5.31
  10   1 -19  280.33   17.87
  10  -1 -19  233.35   15.60
  10   1 -19  283.81   18.84
  10   1 -19  249.17   16.92
  10  -1 -19  246.98   17.46
  10   1 -18  416.72   22.31
  10  -1 -18  365.79   20.28
  10   1 -18  466.95   24.56
  10   1 -18  430.50   22.75
  10  -1 -18  434.40   23.56
  10  -1 -17   36.60    6.24
  10   1 -17   43.36    6.95
  10   1 -17   38.74    6.83
  10  -1 -17   23.28    5.84
  10   1 -17   39.63    7.06
  10   1 -16  321.18   18.83
  10  -1 -16  341.43   19.18
  10   1 -16  364.12   21.03
  10   1 -16  348.06   20.18
  10  -1 -16  332.00   19.98
  10  -1 -15   -1.01    2.29
  10   1 -15    1.97    2.41
  10   1 -15    8.87    3.97
  10  -1 -15    1.10    3.06
  10   1 -15    1.14    2.58
  10  -1 -14  483.18   23.60
  10   1 -14  517.83   23.55
  10   1 -14  512.00   25.20
  10   1 -14  470.55   24.08
  10  -1 -14  462.06   23.73
  10  -1 -13  245.97   16.26
  10   1 -13  254.43   16.88
  10   1 -13  270.80   17.39
  10  -1 -13  257.53   16.65
  10  -1 -12   85.36    9.33
  10   1 -12   73.78    8.82
  10   1 -12   71.78    8.79
  10  -1 -12   65.30    8.24
  10  -1 -11   55.96    7.49
  10   1 -11   58.28    8.12
  10  -1 -11   58.41    7.82
  10   1 -11   46.31    6.91
  10  -1 -10  163.96   13.06
  10   1 -10  178.14   13.03
  10  -1 -10  178.09   12.97
  10   1 -10  147.47   12.57
  10  -1  -9   71.00    8.60
 -10   1   9   54.00    6.84
  10   1  -9   59.51    7.49
  10  -1  -9   76.21    8.42
  10   1  -9   77.11    9.05
 -10   1   8 1052.69   36.09
  10  -1  -8 1074.41   38.79
  10   1  -8 1045.33   36.43
  10  -1  -8 1047.46   36.68
  10   1  -8 1063.93   38.97
 -10   1   7  532.96   22.82
  10  -1  -7  547.13   24.72
  10   1  -7  493.02   22.11
  10  -1  -7  473.38   21.90
  10   1  -7  505.40   24.39
  10  -1  -6   58.92    7.63
 -10   1   6   45.44    6.29
  10   1  -6   43.91    6.69
  10   1  -6   53.53    6.54
  10  -1  -6   47.48    6.22
  10  -1  -5  201.17   14.33
 -10   1   5  167.92   12.17
  10   1  -5  203.96   12.44
  10  -1  -5  220.98   13.19
  10   1  -5  207.78   14.59
  10  -1  -4   14.71    4.36
 -10   1   4   17.54    4.17
  10   1  -4   13.96    4.03
  10   1  -4   13.81    3.33
  10  -1  -4   16.64    3.85
 -10  -1   3  776.46   26.19
 -10   1   3  776.88   29.43
  10   1  -3  787.74   27.02
  10  -1  -3  748.64   27.12
  10   1  -3  776.02   31.09
 -10   1   2  694.74   27.09
 -10  -1   2  672.35   23.81
  10   1  -2  670.53   23.92
  10  -1  -2  672.00   24.55
 -10  -1   1    0.58    1.94
 -10   1   1    4.74    2.63
 -10   1   1    2.54    2.35
  10   1  -1    4.46    2.06
  10  -1  -1    6.61    2.42
 -10   1   0  313.77   16.83
 -10  -1   0  275.78   13.65
  10   1   0  288.51   13.28
 -10   1   0  268.08   16.60
  10  -1   0  309.18   13.99
  10   1   1    3.78    2.90
 -10   1  -1    7.73    2.87
 -10  -1  -1    7.10    2.62
 -10   1  -1    6.81    2.98
  10   1   1    5.71    2.02
  10  -1   1    4.64    2.02
 -10  -1  -2  400.87   17.02
  10   1   2  386.15   15.09
 -10   1  -2  392.81   20.75
  10  -1   2  413.68   15.80
  10   1   2  393.67   20.48
 -10  -1  -3  556.48   21.14
  10   1   3  551.50   18.55
 -10   1  -3  562.64   25.76
  10   1   3  581.75   25.58
  10  -1   3  595.24   19.44
 -10  -1  -4  384.23   16.63
  10   1   4  399.30   20.13
  10   1   4  355.84   13.23
 -10   1  -4  373.95   20.30
  10  -1   4  387.60   13.95
 -10  -1  -5   70.55    6.65
  10   1   5   66.55    7.89
  10   1   5   70.85    4.58
 -10   1  -5   80.00    8.97
  10  -1   5   74.72    4.97
  10   1   6  369.55   19.47
 -10  -1  -6  385.03   16.69
  10  -1   6  360.89   12.02
  10   1   6  369.10   11.57
 -10   1  -6  364.44   20.16
  10   1   7  113.95   10.27
  10  -1   7  113.85    6.64
  10   1   7  123.30    9.05
  10  -1   7  110.71    4.94
 -10   1  -7  113.87   10.86
  10  -1   8  922.81   26.18
  10   1   8 1011.10   31.87
  10   1   8  946.97   34.57
 -10   1  -8  952.56   36.65
  10  -1   9  270.16   10.06
  10   1   9  279.44   14.06
  10   1   9  284.47   16.24
  10  -1  10   22.97    2.50
  10   1  10   22.17    3.87
  10   1  11  279.55   13.71
  10  -1  11  254.35    8.80
 -10   1 -11  267.55   17.49
  10   1  12   59.18    6.03
  10  -1  12   52.67    3.10
 -10   1 -12   57.56    8.07
  10   1  13  215.29   11.73
 -10   1 -13  202.52   15.12
  10   1  14  592.17   21.72
 -10   1 -14  566.05   26.95
  10   1  15    5.21    2.62
 -10   1 -15   13.18    4.19
  10   1  16  229.68   11.95
 -10   1 -16  209.86   15.30
  10   1  17   53.27    5.72
 -10   1 -17   62.84    8.40
  10   1  18   15.06    3.11
 -10   1 -18   16.04    4.65
  10   1  19  166.30   10.14
 -10   1 -19  177.16   13.75
 -10   1 -20   59.11    7.89
 -10   1 -21   92.78    9.90
  10   2 -20  150.54   13.23
  10   2 -19   28.11    5.86
  10   2 -19   30.48    6.25
  10   2 -18   54.41    7.76
  10   2 -18   46.85    7.58
  10   2 -18   45.23    7.63
  10  -2 -18   67.64    9.23
  10   2 -17  353.01   19.94
  10   2 -17  372.82   22.13
  10  -2 -17  417.86   22.81
  10   2 -17  403.83   22.31
  10   2 -16   -2.91    2.84
  10   2 -16    1.17    3.24
  10   2 -16   -1.22    2.52
  10  -2 -16   -1.19    2.45
  10   2 -15  386.34   19.96
  10   2 -15  391.55   22.14
  10  -2 -15  411.94   22.46
  10   2 -15  366.45   21.46
  10   2 -14   15.11    3.87
  10   2 -14   14.94    4.52
  10   2 -14   18.27    4.85
  10  -2 -14   20.48    5.05
  10   2 -13   50.19    6.57
  10   2 -13   61.39    8.41
  10   2 -13   46.29    7.28
  10  -2 -13   49.86    7.74
  10   2 -12  123.14   11.38
  10  -2 -12  106.78   10.80
  10   2 -12  123.78   11.89
 -10   2  11   78.03    8.59
  10   2 -11   94.91    9.86
  10  -2 -11   93.71    9.97
  10   2 -11  101.21   10.51
  10   2 -10   66.07    8.42
 -10   2  10   54.59    7.36
  10   2 -10   48.97    7.23
  10  -2 -10   61.39    8.06
 -10   2   9  821.45   32.21
  10   2  -9  895.94   33.27
  10  -2  -9  882.52   33.87
  10   2  -9  876.80   34.82
 -10   2   8   14.83    4.21
 -10   2   8   16.78    4.32
  10   2  -8   23.71    5.38
  10   2  -8   14.34    4.07
  10  -2  -8   25.99    5.12
 -10   2   7 1091.38   38.75
  10   2  -7 1204.89   39.03
 -10   2   7 1088.74   39.06
  10  -2  -7 1121.06   39.04
  10   2  -7 1140.96   41.08
 -10   2   6  206.82   14.12
  10   2  -6  211.25   13.32
 -10   2   6  228.84   14.87
  10   2  -6  205.97   14.87
  10  -2  -6  190.45   13.41
 -10   2   5   37.53    6.29
 -10   2   5   38.57    6.15
  10   2  -5   56.51    7.79
  10   2  -5   40.34    5.76
 -10   2   4  231.11   14.89
  10   2  -4  230.98   13.41
 -10   2   4  236.18   15.35
 -10   2   3  296.06   17.09
  10   2  -3  276.51   14.54
 -10   2   2   24.89    5.18
  10   2  -2   24.89    4.31
 -10   2   1 1009.02   37.02
  10   2  -1 1025.91   32.60
  10   2  -1 1093.80   38.62
  10   2   0   57.43    7.65
  10   2   0   78.88    6.73
 -10   2   0   65.41    8.11
 -10   2  -1  700.74   29.00
  10   2   1  699.46   23.86
  10   2   1  703.07   29.34
 -10   2  -1  700.05   29.63
 -10  -2  -2   50.90    4.71
 -10   2  -2   54.88    7.76
  10   2   2   48.36    4.97
  10  -2   2   51.42    5.55
 -10  -2  -3  176.62    9.02
  10   2   3  163.65    9.12
  10  -2   3  179.90   10.15
 -10   2  -3  158.46   13.12
  10   2   3  176.03   13.06
 -10  -2  -4   74.95    5.72
  10   2   4   84.91    6.02
  10   2   4   80.90    8.63
  10  -2   4   72.42    6.09
 -10   2  -4   72.62    9.00
 -10  -2  -5  567.85   18.78
  10   2   5  528.10   17.61
  10  -2   5  519.58   18.71
  10   2   5  563.92   24.76
 -10   2  -5  538.69   25.99
  10   2   6    3.31    2.54
  10  -2   6    2.07    0.95
  10   2   6    3.71    3.09
 -10  -2  -6    2.18    1.45
 -10   2  -6    2.23    2.91
  10  -2   6    2.41    1.44
 -10  -2  -7  478.62   15.88
  10   2   7  441.45   19.62
  10  -2   7  444.94   13.81
  10  -2   7  455.88   14.21
  10   2   7  489.40   21.77
 -10   2  -7  460.88   23.29
  10   2   8   44.91    6.62
 -10   2  -8   37.81    6.84
 -10  -2  -8   38.65    4.37
  10   2   8   52.87    6.56
  10  -2   8   34.76    3.24
  10  -2   8   51.12    3.88
 -10  -2  -9  546.71   19.36
  10   2   9  565.25   24.61
  10   2   9  546.52   23.03
  10  -2   9  552.35   15.52
 -10   2  -9  580.80   27.53
  10  -2   9  557.04   15.67
  10   2  10  263.72   15.61
 -10  -2 -10  267.20   11.90
  10   2  10  270.49   14.70
  10  -2  10  218.54    6.57
 -10   2 -10  294.36   18.42
  10   2  11    9.27    3.04
  10   2  11   13.38    3.78
 -10   2 -11   10.65    4.38
  10   2  12   24.37    4.47
  10   2  12   19.23    4.59
 -10   2 -12   14.32    4.69
  10   2  13  214.77   13.01
 -10   2 -13  188.94   15.26
  10   2  14    9.03    3.34
 -10   2 -14    3.59    2.93
  10   2  15 1050.52   34.68
 -10   2 -15 1008.13   39.79
 -10   2 -16   75.09    9.98
  10   2  16   75.43    7.63
 -10   2 -17   45.04    7.49
  10   2  17   47.60    6.02
  10   2  18   50.82    6.35
  10   2  19   -1.46    2.33
  10   2  20  122.74    9.82
  10   3 -20    1.07    2.79
  10   3 -19  552.22   25.85
  10   3 -18   74.47    8.75
  10   3 -17   13.43    4.17
  10   3 -16   90.87    9.29
  10  -3 -16  103.55   10.48
  10   3 -15    7.02    3.44
  10   3 -15    5.01    4.01
  10  -3 -15    9.06    3.60
  10   3 -14    5.00    2.67
  10   3 -14    3.62    3.15
  10  -3 -14    4.84    3.47
  10   3 -14    1.22    3.37
  10   3 -13 1329.09   41.71
  10  -3 -13 1320.44   43.63
  10   3 -13 1352.63   47.30
  10   3 -13 1231.60   46.16
 -10   3  12   78.04    9.08
 -10   3  12   51.02    7.09
  10   3 -12   63.71    8.75
  10   3 -12   51.69    6.52
  10  -3 -12   81.33    8.60
  10   3 -12   67.00    8.88
 -10  -3  12   56.39    8.15
 -10   3  11  285.02   17.54
  10  -3 -11  316.22   17.02
  10   3 -11  336.26   19.42
 -10   3  11  283.56   16.84
 -10  -3  11  320.90   18.56
 -10   3  10  108.81   10.67
  10  -3 -10  135.30   10.58
  10   3 -10  117.22   11.22
  10   3 -10  122.11   12.00
 -10   3  10  131.50   11.25
 -10  -3  10  121.67   11.11
 -10   3   9   34.66    6.09
  10   3  -9   41.03    7.19
 -10   3   9   38.99    6.30
  10  -3  -9   40.69    5.67
  10   3  -9   44.58    6.93
 -10  -3   9   42.96    6.75
 -10   3   8  237.32   15.80
  10  -3  -8  232.35   13.58
  10   3  -8  211.10   14.78
  10   3  -8  218.83   15.82
 -10   3   8  268.27   16.56
 -10  -3   8  245.18   15.62
 -10   3   7  408.65   21.49
  10  -3  -7  401.24   18.15
  10   3  -7  403.90   20.40
  10   3  -7  423.20   22.57
 -10  -3   7  405.39   20.46
 -10   3   7  393.83   20.91
 -10   3   6   22.85    5.18
 -10   3   6   18.40    5.01
  10  -3  -6   12.44    3.22
  10   3  -6   16.87    4.20
 -10  -3   6   17.68    4.26
 -10   3   5  549.37   25.69
  10  -3  -5  534.30   20.96
  10   3  -5  562.32   23.83
 -10  -3   5  540.62   23.73
 -10   3   5  597.21   26.50
 -10   3   4    6.29    3.62
 -10   3   4    2.11    2.93
  10  -3  -4    3.99    2.17
  10   3  -4    4.03    2.69
 -10  -3   4    5.80    2.65
 -10   3   3 1169.34   42.23
  10  -3  -3 1245.85   35.35
  10   3  -3 1198.96   38.52
 -10  -3   3 1238.36   39.43
  10   3  -3 1116.58   41.91
 -10   3   3 1163.31   42.37
 -10   3   2  164.72   13.47
  10  -3  -2  197.82   10.17
  10   3  -2  189.82   11.98
 -10  -3   2  197.59   12.54
  10   3  -2  173.28   13.68
 -10   3   2  198.94   14.81
 -10   3   1   24.68    5.80
  10   3  -1   24.04    5.22
  10   3  -1   21.86    4.30
 -10  -3   1   24.30    4.54
 -10   3   0   -1.08    3.00
  10   3   0    1.03    2.53
  10   3   0    2.71    2.26
 -10  -3   0   -0.71    1.60
 -10   3  -1  336.06   19.73
  10  -3   1  356.74   12.92
  10   3   1  366.78   16.40
 -10  -3  -1  344.14   16.52
  10   3   1  332.46   19.14
  10  -3   2   87.04    5.15
  10   3   2   80.54    7.10
 -10  -3  -2   94.26    7.95
 -10   3  -2   90.36   10.26
  10   3   2   91.12    9.63
  10  -3   3  954.19   25.35
  10   3   3 1006.14   31.14
 -10  -3  -3 1045.12   32.04
 -10   3  -3  999.27   38.82
  10   3   3 1042.19   37.44
  10  -3   4    3.71    0.92
  10   3   4    4.94    3.16
 -10   3  -4    4.68    3.06
 -10  -3  -4    9.19    2.71
  10   3   5  428.10   21.73
  10   3   5  417.02   21.48
 -10  -3  -5  445.46   17.39
 -10   3  -5  468.02   24.45
  10   3   6  142.92   11.72
  10  -3   6  136.31    8.42
 -10  -3  -6  138.82    8.56
  10   3   6  153.18   12.22
 -10   3  -6  139.19   12.90
 -10   3  -7   40.00    7.14
  10   3   7   52.65    7.11
  10   3   7   43.82    6.65
  10  -3   7   39.23    4.38
 -10  -3  -7   41.12    4.46
  10   3   8   61.02    7.63
  10   3   8   80.74    8.59
 -10   3  -8   89.43   10.62
  10   3   9  626.44   26.15
  10   3   9  588.98   25.53
 -10   3  -9  540.97   27.75
  10   3  10  111.96   10.24
  10  -3  10  117.80    6.67
  10   3  10  141.17   11.35
 -10   3 -10  135.16   12.94
  10   3  11  475.51   22.16
  10   3  11  495.67   22.59
  10  -3  11  443.13   14.55
 -10   3 -11  446.38   24.68
  10   3  12   -0.88    1.99
  10   3  12    1.81    2.36
  10  -3  12   -0.23    1.03
  10   3  13  262.98   15.07
  10   3  13  251.88   15.21
  10   3  14   34.21    5.86
  10   3  14   28.89    5.19
  10   3  15   90.23    9.21
  10   3  16   52.51    7.02
  10   3  17  128.08   10.87
  10   3  18    0.88    2.92
  10   4 -19   25.35    5.51
  10   4 -18  132.17   11.45
  10   4 -17   60.41    7.52
  10   4 -16    0.86    2.11
  10   4 -15   61.41    7.34
  10  -4 -14  291.94   17.71
  10   4 -14  283.77   15.52
 -10   4  14  252.51   15.88
  10  -4 -13   38.38    6.32
  10   4 -13   42.28    5.73
 -10   4  13   29.54    5.96
  10   4 -12  422.00   18.68
  10  -4 -12  412.90   20.77
  10   4 -12  428.39   23.88
 -10   4  12  469.36   22.36
 -10   4  11   63.12    8.10
  10  -4 -11   49.71    6.84
  10   4 -11   52.61    8.02
  10  -4 -10  223.64   13.82
  10   4 -10  199.56   14.93
 -10  -4  10  183.68   14.34
 -10   4  10  196.24   14.54
 -10   4   9  141.56   12.64
  10  -4  -9  146.78   10.90
  10   4  -9  136.18   12.38
 -10  -4   9  138.66   11.98
 -10   4   9  150.43   12.59
 -10   4   8   18.92    5.05
 -10   4   8   11.77    4.55
  10  -4  -8   26.68    4.61
  10   4  -8   13.74    4.38
 -10  -4   8   23.84    5.29
 -10   4   7  248.08   16.97
  10  -4  -7  247.49   13.83
  10   4  -7  268.97   16.78
 -10  -4   7  259.47   16.33
 -10   4   7  268.08   17.24
 -10   4   6  296.10   18.62
  10  -4  -6  274.61   14.23
  10   4  -6  269.14   16.85
 -10   4   6  299.51   18.50
 -10  -4   6  298.14   17.25
 -10   4   5    4.56    3.33
  10   4  -5   12.73    4.54
 -10   4   5    5.64    3.61
  10  -4  -5   10.98    3.14
  10   4  -5    3.79    2.91
 -10  -4   5    5.51    2.69
 -10   4   4  368.44   21.04
  10  -4  -4  361.62   15.64
  10   4  -4  369.76   19.11
 -10  -4   4  359.82   18.73
  10   4  -4  345.83   20.56
 -10   4   4  325.92   19.93
 -10   4   3   53.56    8.16
 -10   4   3   68.47    9.00
  10  -4  -3   60.51    5.80
  10   4  -3   61.93    7.48
  10   4  -3   76.00    9.52
 -10  -4   3   58.10    7.24
 -10   4   2  182.32   14.71
  10  -4  -2  170.53    9.46
  10   4  -2  192.96   12.87
  10   4  -2  175.86   14.13
 -10   4   2  164.59   14.01
 -10  -4   2  179.72   12.49
 -10   4   1  319.95   19.56
  10   4  -1  254.89   15.17
  10   4  -1  321.44   19.13
 -10   4   1  328.47   19.94
 -10  -4   1  297.90   16.20
 -10   4   0   20.29    5.74
  10   4   0   21.80    5.15
 -10   4   0   15.64    4.99
  10   4   0   15.48    3.74
 -10  -4   0   18.21    4.09
  10   4   1   25.85    5.49
  10  -4   1   32.09    3.17
 -10   4  -1   28.80    6.21
  10   4   1   27.45    4.79
 -10  -4  -1   33.75    5.30
  10  -4   2  278.00    9.58
  10   4   2  294.46   18.08
 -10  -4  -2  305.95   15.66
  10   4   3    1.13    2.56
  10   4   3    7.30    3.61
 -10  -4  -3    5.01    2.81
  10   4   4  548.97   26.11
 -10   4  -4  492.49   26.27
  10   4   4  524.47   24.91
 -10  -4  -4  497.51   20.85
  10   4   5  115.83   11.59
  10  -4   5  138.06    9.60
  10   4   5  155.61   12.52
 -10  -4  -5  129.60    9.45
  10   4   6   15.98    4.44
  10   4   6   23.08    5.29
  10  -4   6   13.25    3.21
 -10  -4  -6   21.86    3.76
  10   4   7  240.56   16.47
  10  -4   7  231.95   12.61
  10   4   7  235.91   15.65
  10   4   8    2.89    2.67
  10   4   8    7.52    3.84
  10  -4   8    1.74    1.61
  10   4   9  146.63   12.56
  10  -4   9  124.30    8.48
  10   4   9  133.87   11.34
  10   4  10  750.15   30.76
  10  -4  10  677.21   23.03
  10   4  10  680.11   28.18
  10   4  11   16.32    4.37
  10  -4  11   18.72    3.26
  10   4  12  151.71   12.08
  10   4  13    0.88    2.43
  10   4  14   36.56    5.83
  10   4  15  175.52   12.57
 -10   5  16  150.62   12.00
 -10   5  15    5.65    3.48
 -10   5  14  334.23   18.86
 -10   5  13   13.05    4.05
  10  -5 -12   29.19    5.54
  10  -5 -11   19.76    4.71
  10  -5 -10  159.10   11.98
  10  -5  -9    4.88    2.81
  10  -5  -8  707.26   27.01
  10  -5  -7   12.31    3.28
  10   5  -7    9.02    3.76
  10  -5  -6  127.02    9.50
  10   5  -6  151.92   13.05
  10  -5  -5   31.11    4.55
  10   5  -5   27.19    6.15
 -10  -5   5   32.35    6.02
  10  -5  -4    8.23    2.78
  10   5  -4   14.14    4.48
 -10  -5   4    6.91    3.30
  10  -5  -3   16.16    3.36
  10   5  -3   20.52    5.20
 -10  -5   3   19.33    4.82
  10  -5  -2  647.74   21.53
  10   5  -2  626.10   26.91
 -10  -5   2  593.43   26.33
  10  -5  -1   17.36    3.03
 -10  -5   1   15.67    4.44
 -10  -5   0  209.72   14.10
 -10  -5  -1    0.88    2.43
 -10  -5  -2  312.05   17.21
  10  -5   3   46.65    6.49
 -10  -5  -3   59.08    7.18
  10  -5   4   67.32    7.56
  10  -5   5   26.86    4.88
  10  -5   6  226.56   13.81
  10  -5   7   -0.75    1.96
  10  -5   8  444.09   19.56
  11   0 -21   96.02   10.66
  11   0 -20    1.09    2.86
  11   0 -19    8.88    3.97
  11   0 -18    3.36    3.11
  11   0 -17  639.82   29.00
  11   0 -17  626.85   29.52
  11   0 -16   -1.15    2.59
  11   0 -16   -5.90    2.89
  11   0 -15  282.01   18.53
  11   0 -15  281.98   18.19
  11   0 -14    2.30    3.01
  11   0 -14   -1.12    3.26
  11   0 -13  516.28   25.42
  11   0 -13  537.34   26.29
  11   0 -12    2.30    3.67
  11   0 -12   -1.05    2.38
  11   0 -11  311.64   18.65
  11   0 -11  360.77   20.60
  11   0 -10   -1.14    2.58
  11   0 -10   -0.97    2.37
  11   0  -9  354.56   20.86
  11   0  -9  389.61   19.77
  11   0  -8    1.12    2.75
  11   0  -8   -0.89    2.60
  11   0  -7  821.65   33.09
  11   0  -7  731.82   28.73
  11   0  -6   -1.10    2.69
 -11   0   6    1.54    1.88
  11   0  -6   -0.81    2.11
 -11   0   5   23.91    4.37
  11   0  -5   31.65    5.99
  11   0  -5   22.93    4.27
 -11   0   4   -0.77    2.35
  11   0  -4    1.08    2.64
  11   0  -4   -0.72    1.63
  11   0  -3   17.14    4.55
 -11   0   3   11.57    3.36
  11   0  -3   16.31    3.56
  11   0  -2   -1.06    2.60
 -11   0   2    0.77    2.37
  11   0  -2    2.54    2.03
 -11   0   1 1967.37   56.52
  11   0  -1 1983.76   53.52
 -11   0   0   -0.79    2.18
  11   0   0    1.08    1.79
 -11   0  -1   90.15    8.72
  11   0   1  116.27    7.62
  11   0   2   -1.04    3.03
 -11   0  -2   -2.41    2.67
  11   0   2    1.32    1.52
 -11   0  -3  575.41   23.70
  11   0   3  611.17   26.58
  11   0   3  521.80   17.93
 -11   0  -4    0.82    2.14
  11   0   4    0.33    1.26
 -11   0  -5  474.27   21.78
  11   0   5  521.07   15.65
  11   0   6    0.74    0.95
 -11   0  -6    0.84    2.33
  11   0   7  394.92   16.54
  11   0   8    0.54    1.49
  11   0   9  818.69   26.28
  11   0  10    0.49    1.63
  11   0  11  113.21    7.42
  11   0  12   -0.44    1.29
  11   0  13  123.70    7.45
  11   0  14   -0.39    1.54
  11   0  15  720.81   21.99
  11  -1 -22   94.62   10.14
  11  -1 -21  166.95   13.36
  11  -1 -20   11.47    4.09
  11  -1 -19  241.39   16.20
  11   1 -18    2.29    2.80
  11  -1 -18   10.76    3.85
  11  -1 -17  119.92   11.64
  11   1 -17   97.92   11.06
  11  -1 -16  322.12   19.53
  11   1 -16  394.52   22.34
  11   1 -16  330.23   20.68
  11  -1 -16  369.73   21.34
  11  -1 -15    7.80    3.58
  11   1 -15   16.76    4.95
  11  -1 -15   10.42    4.01
  11   1 -15   22.56    5.71
  11  -1 -14  107.54   11.22
  11   1 -14  118.26   11.83
  11   1 -14  140.74   13.03
  11  -1 -14  132.86   12.15
  11  -1 -13  204.20   15.33
  11   1 -13  183.63   14.53
  11   1 -13  226.40   16.42
  11  -1 -13  224.09   15.64
  11  -1 -12    3.37    2.93
  11   1 -12    5.89    3.44
  11  -1 -12    3.18    2.59
  11   1 -12    1.07    2.20
  11  -1 -11  286.53   18.31
  11   1 -11  301.35   18.09
  11   1 -11  286.36   18.72
  11  -1 -11  317.82   18.39
  11  -1 -10   84.88    9.78
  11   1 -10  113.08   10.52
  11   1 -10   84.50   10.24
  11  -1 -10   97.10    9.94
 -11   1   9  176.80   12.75
  11  -1  -9  169.12   13.81
  11   1  -9  192.98   13.60
  11   1  -9  216.78   15.66
  11  -1  -9  190.61   13.62
 -11   1   8  243.35   15.02
  11  -1  -8  261.79   17.28
  11   1  -8  234.11   14.95
  11   1  -8  264.32   17.41
  11  -1  -8  269.48   15.95
 -11   1   7  122.15   10.51
  11  -1  -7  103.03   10.89
  11   1  -7  130.24   10.56
  11  -1  -7  132.97   10.84
  11   1  -7  118.81   11.78
 -11   1   6  238.27   14.72
  11  -1  -6  229.44   16.07
  11   1  -6  223.58   13.72
  11   1  -6  225.02   15.90
  11  -1  -6  222.57   13.88
 -11   1   5  298.96   16.79
  11   1  -5  287.25   15.45
  11   1  -5  296.51   18.35
  11  -1  -5  295.12   15.91
  11   1  -4    4.35    2.66
 -11   1   4    8.92    3.40
  11  -1  -4    5.31    2.98
  11   1  -4    2.89    1.89
 -11   1   3  517.73   23.46
  11   1  -3  552.41   21.47
  11  -1  -3  509.24   21.36
 -11  -1   2  106.94    8.35
 -11   1   2  111.21   10.07
  11   1  -2   96.89    7.93
  11  -1  -2  106.44    8.42
 -11   1   1  266.15   15.74
 -11  -1   1  250.35   13.15
  11   1  -1  237.77   12.51
  11  -1  -1  238.52   12.81
 -11   1   0  316.21   17.58
 -11  -1   0  306.37   14.78
  11   1   0  320.02   14.25
 -11   1   0  309.45   18.49
  11   1   0  320.98   18.80
  11  -1   0  300.59   14.27
 -11   1  -1  197.76   13.70
 -11  -1  -1  185.24   11.10
  11   1   1  192.82   10.23
 -11   1  -1  157.87   13.07
  11   1   1  180.91   13.96
  11  -1   1  179.28   10.22
 -11   1  -2  188.55   13.33
  11   1   2  185.10   13.86
 -11  -1  -2  170.42   10.81
  11   1   2  170.12    9.24
 -11   1  -2  166.57   13.50
  11  -1   2  170.86    9.52
  11   1   3  511.47   25.17
 -11   1  -3  597.34   25.59
 -11  -1  -3  576.11   21.97
  11   1   3  556.52   18.63
 -11   1  -3  557.82   26.42
  11  -1   3  540.15   18.85
 -11  -1  -4   38.03    5.18
 -11   1  -4   29.66    5.89
 -11   1  -4   40.89    6.57
  11   1   4   38.67    3.87
  11  -1   4   45.51    4.24
 -11  -1  -5  351.23   16.49
  11   1   5  341.63   19.43
  11  -1   5  367.99   12.85
  11   1   5  371.56   12.53
 -11   1  -5  321.43   19.63
 -11  -1  -6  246.66   13.40
  11   1   6  249.67   16.16
  11   1   6  233.66    8.35
  11  -1   6  237.45    8.98
 -11   1  -6  254.82   17.04
 -11  -1  -7    1.38    2.30
  11   1   7    2.01    2.08
 -11   1  -7    1.14    2.79
  11  -1   7    1.17    1.35
  11   1   7    0.72    1.87
  11  -1   7   -0.16    0.79
  11  -1   8  209.97    9.32
  11   1   8  194.85   12.01
 -11  -1  -8  192.40   12.08
  11   1   8  230.76   15.15
 -11   1  -8  244.68   16.79
  11  -1   9   96.15    5.62
  11   1   9   99.20    8.13
 -11   1  -9   95.54   10.64
  11   1  10  210.42   12.18
  11  -1  10  214.29    8.39
 -11   1 -10  219.60   16.13
  11   1  11  482.21   19.32
  11  -1  11  430.05   12.98
 -11   1 -11  443.79   23.90
  11   1  12   39.89    5.18
  11  -1  12   30.27    2.22
 -11   1 -12   30.78    6.22
  11   1  13  179.36   10.89
 -11   1 -13  208.43   15.66
  11   1  14   51.41    5.72
 -11   1 -14   67.20    9.13
  11   1  15   18.81    3.67
 -11   1 -15   19.93    5.21
  11   1  16   48.04    5.49
  11   1  17  106.54    7.99
  11   2 -18  438.55   23.05
  11   2 -17   91.60    9.97
  11   2 -16    1.01    2.29
  11   2 -15    3.67    3.20
  11  -2 -15    2.41    2.94
  11   2 -14   22.46    5.26
  11  -2 -14   27.04    5.87
  11   2 -13   12.26    4.24
  11   2 -13    5.71    3.34
  11  -2 -13    8.01    3.67
  11   2 -12  984.68   37.52
  11  -2 -12  961.85   37.41
  11   2 -12  938.94   38.06
  11   2 -11   68.69    9.32
  11   2 -11   67.79    8.62
  11  -2 -11   84.44    9.67
 -11   2  10  238.54   15.75
  11   2 -10  249.09   16.23
  11  -2 -10  254.40   16.60
  11   2 -10  251.19   17.56
 -11   2   9    1.97    2.41
  11   2  -9    1.18    3.09
  11   2  -9    2.93    2.21
  11  -2  -9    2.03    2.65
 -11   2   8   32.38    5.85
  11   2  -8   32.82    6.63
  11   2  -8   35.45    5.89
  11  -2  -8   33.43    5.86
 -11   2   7   73.18    8.56
  11   2  -7   63.78    8.64
  11   2  -7   71.21    7.99
  11  -2  -7   71.44    8.48
 -11   2   6  376.53   20.18
  11   2  -6  398.94   19.18
  11   2  -6  414.85   22.44
 -11   2   6  354.95   20.02
  11  -2  -6  340.08   18.75
 -11   2   5    4.02    3.08
 -11   2   5    2.09    2.74
  11   2  -5    1.14    2.58
  11   2  -5    0.81    1.97
  11  -2  -5   -0.88    2.15
 -11   2   4  206.80   14.48
  11   2  -4  202.71   12.60
 -11   2   4  198.46   14.65
  11  -2  -4  190.73   12.97
 -11   2   3   64.75    8.27
  11   2  -3   62.92    6.90
  11  -2  -3   70.81    7.53
 -11   2   2  732.05   30.35
  11   2  -2  778.23   26.82
  11  -2  -2  689.07   26.85
  11   2  -2  714.98   30.89
 -11   2   1    1.03    2.13
  11   2  -1    1.09    2.25
  11   2  -1    5.12    2.51
  11  -2  -1    3.61    2.22
 -11   2   0   85.27    9.41
 -11   2   0   70.02    9.04
  11   2   0   65.60    6.42
  11  -2   0   76.66    7.35
  11   2   0   91.41    9.82
 -11   2  -1   -1.04    2.36
 -11   2  -1    2.24    2.54
  11   2   1    3.18    3.25
  11   2   1    3.35    1.93
  11  -2   1    1.26    1.85
 -11   2  -2  173.08   13.56
  11   2   2  181.41   10.08
  11   2   2  197.86   14.44
  11  -2   2  172.46   10.33
 -11   2  -2  167.02   13.86
  11   2   3    6.26    3.34
 -11   2  -3    3.45    3.36
 -11  -2  -3    6.80    2.18
 -11   2  -3    5.31    3.54
  11   2   3    3.37    1.99
  11  -2   3    5.42    2.40
 -11  -2  -4 1205.91   33.28
  11   2   4 1111.81   32.25
  11  -2   4 1153.22   33.64
 -11   2  -4 1126.44   42.42
  11   2   4 1157.23   41.21
 -11  -2  -5  114.07    7.53
  11   2   5  114.15    6.68
  11  -2   5  116.93    7.39
 -11   2  -5  108.44   11.52
  11   2   5  100.06   10.37
  11  -2   6   89.28    4.54
 -11  -2  -6   88.55    6.57
 -11   2  -6   92.05   10.80
  11   2   6   99.63   10.02
  11  -2   6   75.96    5.57
  11   2   7   24.33    5.22
 -11  -2  -7   21.46    3.54
 -11   2  -7   15.72    5.00
  11  -2   7   12.13    1.14
  11  -2   7   12.26    1.12
  11   2   7   22.35    4.64
  11  -2   7   21.00    2.64
  11  -2   7   16.63    2.51
 -11  -2  -8   21.37    3.50
  11   2   8   15.04    4.16
 -11   2  -8   24.49    6.00
  11   2   8   19.37    4.49
  11  -2   8   16.88    2.15
  11  -2   8   25.13    2.54
 -11  -2  -9   74.55    6.09
  11   2   9   73.52    8.72
 -11   2  -9   81.69   10.38
  11   2   9   69.12    7.65
  11  -2   9   59.45    3.11
  11  -2   9   60.95    3.14
  11   2  10  590.11   24.06
 -11  -2 -10  547.90   19.97
  11   2  10  579.35   25.92
 -11   2 -10  555.69   27.87
  11   2  11    6.42    3.15
  11   2  11    2.91    2.54
 -11   2 -11    2.53    3.30
  11   2  12  149.79   11.06
  11   2  13   19.63    4.13
  11   2  14  191.41   12.54
  11   2  15    3.82    2.34
  11   2  16  123.07    9.99
  11   2  17    2.22    2.81
  11   2  18  136.46   10.49
  11   3 -18  194.11   14.72
  11   3 -17   19.86    5.29
  11   3 -16  222.04   15.03
  11   3 -15    8.17    3.25
  11  -3 -14  354.48   19.51
  11  -3 -13   39.98    6.32
  11   3 -13   30.32    6.38
  11  -3 -13   31.33    6.59
  11  -3 -12    1.83    2.24
  11   3 -12    1.17    3.06
  11  -3 -12    1.22    2.52
  11  -3 -11   51.86    6.99
  11   3 -11   58.76    8.11
 -11   3  10  138.79   12.33
  11  -3 -10  143.20   11.20
  11   3 -10  104.30   10.99
 -11   3  10  138.39   11.95
 -11   3   9    2.15    2.63
 -11   3   9   -1.06    3.09
  11  -3  -9   -1.61    2.46
  11   3  -9    4.17    2.55
 -11   3   8  322.96   19.25
  11  -3  -8  300.35   16.00
  11   3  -8  300.37   17.99
 -11   3   8  341.64   19.49
 -11   3   7   20.71    5.44
 -11   3   7   20.69    5.15
  11  -3  -7   20.18    4.23
  11   3  -7   21.05    4.94
 -11   3   6  213.07   15.43
  11  -3  -6  200.81   12.00
  11   3  -6  189.42   13.42
 -11   3   6  202.96   14.98
 -11   3   5   17.93    4.87
 -11   3   5   15.54    4.60
  11   3  -5   21.70    4.62
  11  -3  -5   15.86    3.39
 -11   3   4   -1.12    2.91
 -11   3   4   -1.14    3.48
  11   3  -4    1.17    2.64
  11  -3  -4    0.59    1.44
  11   3  -4    0.83    2.02
 -11   3   3   66.21    8.94
  11   3  -3   77.52    9.63
  11  -3  -3   71.77    6.37
  11   3  -3   67.98    7.47
 -11   3   3   87.40    9.98
 -11   3   2  368.92   20.93
  11  -3  -2  367.54   14.97
  11   3  -2  335.35   16.92
 -11   3   2  386.88   21.60
  11   3  -2  320.57   20.11
 -11   3   1   42.34    7.25
  11   3  -1   49.94    7.71
  11  -3  -1   53.27    5.14
  11   3  -1   46.32    5.96
 -11   3   0  584.69   27.41
  11   3   0  555.60   22.16
  11   3   0  541.27   26.35
 -11   3  -1    1.16    2.63
  11   3   1    3.33    3.24
  11   3   1    0.65    2.00
 -11   3  -2  151.98   13.35
  11  -3   2  168.18    7.61
  11   3   2  184.67   10.73
  11   3   2  145.73   12.86
 -11   3  -2  157.09   13.93
 -11   3  -3   34.77    7.01
  11   3   3   38.92    6.80
  11   3   3   24.85    4.12
  11  -3   3   29.22    2.66
  11  -3   4    0.52    0.54
 -11   3  -4    3.77    2.60
  11   3   4    1.07    1.97
  11   3   5   10.29    3.69
  11   3   5    6.30    3.63
  11   3   6  341.21   19.13
  11  -3   6  329.91   14.07
  11   3   6  349.91   19.67
  11   3   7    1.03    2.68
  11   3   7    0.99    2.43
  11  -3   7   -0.45    1.17
  11   3   8  270.73   16.55
  11   3   8  238.35   16.04
  11   3   9    0.97    2.53
  11   3   9    4.05    3.37
  11  -3   9    1.96    1.50
  11   3  10   41.28    6.57
  11   3  10   29.81    5.72
  11  -3  10   40.32    3.74
  11   3  11  154.31   12.49
  11   3  11  167.21   12.67
  11   3  12   81.98    9.09
  11   3  12   85.67    9.04
  11   3  13    7.58    3.16
  11   3  13   13.01    3.94
  11   3  14   90.73    9.25
  11   3  14   75.43    8.60
  11   3  15   -0.91    3.94
  11  -4 -13   49.48    7.30
  11  -4 -12  274.17   16.50
  11  -4 -11   28.27    5.45
  11  -4 -10    5.03    2.90
  11  -4  -9  104.90    9.34
  11   4  -9  111.36   11.32
  11  -4  -8   59.32    6.84
  11   4  -8   72.22    8.86
 -11  -4   8   74.29    8.87
  11  -4  -7  474.85   19.85
  11   4  -7  456.39   22.97
 -11  -4   7  405.59   21.67
  11  -4  -6  454.37   19.39
  11   4  -6  506.09   23.75
 -11  -4   6  439.31   22.32
  11  -4  -5   58.47    6.21
  11   4  -5   57.91    7.58
 -11  -4   5   69.06    8.27
  11  -4  -4   39.37    5.01
  11   4  -4   37.31    6.21
 -11  -4   4   36.31    6.32
  11  -4  -3    2.61    1.67
  11   4  -3   -0.90    2.49
 -11  -4   3    0.91    2.65
  11  -4  -2  139.22    8.30
  11   4  -2  123.45   10.49
 -11  -4   2  119.27   10.37
  11  -4  -1  237.36   10.93
  11   4  -1  265.05   15.11
 -11  -4   1  244.01   14.85
  11   4   0    2.34    1.91
 -11  -4   0    1.65    1.86
  11  -4   1  139.89    6.68
  11   4   1  140.27   10.40
 -11  -4  -1  127.02   10.35
 -11  -4  -2   31.20    5.02
  11  -4   5  137.95    9.65
  11  -4   6    2.49    1.99
  11  -4   7  248.30   12.85
  11  -5 -11  359.62   19.10
  11  -5 -10   11.91    3.86
  11   5  -4   17.27    4.71
  11   5  -3  302.76   17.81
  11   5  -2   -0.95    2.90
 -11  -5   2   -0.96    2.35
 -11  -5   1   30.04    5.66
  11  -5   3  342.37   17.82
  11  -5   4   27.41    5.25
  12   0 -14  174.86   14.50
  12   0 -13   -2.27    3.63
  12   0 -12  332.84   19.72
  12   0 -11    1.24    2.81
  12   0 -11   -2.10    3.63
  12   0 -10  278.78   18.83
  12   0 -10  319.03   18.30
  12   0  -9    2.45    3.00
  12   0  -9    0.97    2.37
  12   0  -8   41.39    7.15
  12   0  -8   29.68    5.54
  12   0  -7    1.21    2.23
  12   0  -7    0.89    2.01
  12   0  -6  266.88   18.05
  12   0  -6  287.10   15.92
  12   0  -5   -1.19    2.45
 -12   0   5    0.82    1.85
  12   0  -5   -0.80    1.96
 -12   0   4  392.66   19.06
  12   0  -4  412.19   22.74
  12   0  -4  359.33   17.70
 -12   0   3    0.82    2.39
  12   0  -3    1.17    2.65
  12   0  -3    2.13    2.07
 -12   0   2  252.37   14.98
  12   0  -2  232.80   17.00
  12   0  -2  279.86   14.07
 -12   0   1   -0.83    1.88
  12   0  -1    0.61    1.95
 -12   0   0   10.93    3.30
  12   0   0   11.75    2.80
  12   0   1    1.13    2.75
 -12   0  -1    0.85    2.07
  12   0   1    0.51    1.55
 -12   0  -2  255.43   15.08
  12   0   2  245.40   11.46
 -12   0  -3   -0.86    2.39
  12   0   3    1.99    1.47
 -12   0  -4  725.62   28.22
  12   0   4  691.01   20.90
 -12   0  -5   -1.77    2.96
  12   0   5    1.06    1.12
 -12   0  -6   90.48    8.95
  12   0   6   85.71    3.99
  12   0   7    0.60    1.65
 -12   0  -7    0.91    2.79
  12   0   8    2.83    2.02
 -12   0  -8    0.92    2.08
  12   0   9    1.62    1.79
  12   0  10  458.01   17.59
  12   0  11   -0.48    1.65
  12   0  12  313.61   13.15
  12   1 -14   84.12   10.40
  12  -1 -14  101.67   10.98
  12   1 -13  105.33   10.99
  12  -1 -13   92.06   10.24
  12  -1 -12   56.89    8.48
  12  -1 -12   67.25    8.75
  12   1 -12   70.68    9.00
  12  -1 -11  142.76   13.20
  12   1 -11  153.05   12.68
  12  -1 -11  130.59   11.97
  12  -1 -10  274.68   18.59
  12   1 -10  268.59   16.90
  12  -1 -10  307.89   18.06
  12  -1  -9    2.39    3.13
  12  -1  -9   -1.00    2.25
  12   1  -9    0.98    1.81
 -12   1   8  255.35   15.76
  12   1  -8  233.22   15.10
  12   1  -8  254.63   17.81
  12  -1  -8  244.05   15.51
 -12   1   7    2.81    2.60
  12   1  -7    2.43    2.75
  12  -1  -7    2.74    2.92
  12   1  -7    8.00    3.08
 -12   1   6  324.12   17.95
  12   1  -6  330.83   17.24
  12  -1  -6  280.71   16.42
  12   1  -6  317.10   20.06
 -12   1   5  379.37   20.01
  12   1  -5  367.41   18.24
  12  -1  -5  408.43   19.33
  12   1  -5  401.31   22.68
  12   1  -4    1.19    2.20
 -12   1   4    6.62    3.15
  12   1  -4    2.24    2.08
  12  -1  -4    6.28    2.61
 -12   1   3  136.39   11.43
  12   1  -3  130.71    9.68
  12  -1  -3  112.86    9.39
 -12  -1   2  198.81   11.98
 -12   1   2  196.61   13.97
  12   1  -2  209.65   12.05
  12  -1  -2  220.90   12.62
 -12  -1   1   31.68    4.91
 -12   1   1   35.86    6.30
  12   1  -1   32.44    4.67
  12  -1  -1   24.06    4.30
 -12  -1   0  830.84   28.35
  12   1   0  818.15   34.10
 -12   1   0  808.46   31.73
  12   1   0  760.90   26.36
  12  -1   0  832.53   27.45
 -12   1  -1  115.51   10.79
  12   1   1  108.33   11.12
 -12  -1  -1   91.49    8.03
  12   1   1   98.24    7.33
  12  -1   1  108.57    7.87
 -12   1  -2    2.99    2.76
  12   1   2    2.26    2.76
 -12  -1  -2    3.41    1.89
  12   1   2    0.47    1.38
  12  -1   2    1.00    1.38
  12   1   3   17.96    4.88
 -12   1  -3   23.17    5.20
 -12  -1  -3   24.16    4.35
  12   1   3   22.05    3.15
  12  -1   3   17.86    3.06
  12   1   4    6.72    3.59
 -12   1  -4   11.16    4.40
 -12   1  -4   11.88    4.11
 -12  -1  -4    9.78    3.36
  12   1   4   10.38    2.15
  12  -1   4   10.32    2.27
  12   1   5  391.98   21.62
 -12   1  -5  423.42   21.44
 -12  -1  -5  388.77   17.82
  12   1   5  371.29   12.75
  12  -1   5  392.85   13.35
 -12   1  -5  346.72   21.28
 -12  -1  -6  496.07   20.71
  12   1   6  465.00   23.96
 -12   1  -6  527.01   24.59
  12  -1   6  495.49   17.68
  12   1   6  472.87   20.97
  12  -1   6  476.97   14.32
 -12   1  -6  460.54   24.95
 -12   1  -7   29.32    6.59
 -12  -1  -7   23.36    4.73
  12  -1   7   29.82    3.63
  12   1   7   27.09    4.72
  12  -1   8  144.39    7.62
  12   1   8  134.92   10.12
 -12  -1  -8  130.26   10.08
  12   1   9   -0.71    1.85
  12  -1   9    1.53    1.36
 -12  -1  -9    1.51    2.61
  12   1  10  254.73   13.86
  12  -1  10  256.78    9.46
 -12  -1 -10  259.29   14.63
  12   1  11  137.63    9.84
 -12  -1 -11  142.74   10.73
  12   1  12   56.63    6.22
  12   1  13   34.61    5.02
  12   1  14  132.97    9.46
  12   2 -13   89.21   10.27
  12  -2 -13   76.62    9.66
  12   2 -12  139.49   12.72
  12  -2 -12  143.19   12.80
  12   2 -11   57.96    8.13
  12  -2 -11   66.70    8.70
  12   2 -10    6.30    3.07
  12  -2 -10    7.54    3.72
 -12   2   9  246.41   16.36
  12   2  -9  261.83   16.44
  12  -2  -9  240.94   16.19
  12   2  -8   43.42    6.58
  12  -2  -8   37.29    6.35
 -12   2   7  460.75   23.16
  12   2  -7  481.05   22.50
  12  -2  -7  441.85   22.15
 -12   2   6   33.61    6.25
  12   2  -6   27.21    5.11
  12  -2  -6   35.58    6.03
 -12   2   5   49.63    7.45
  12   2  -5   57.40    6.92
  12  -2  -5   49.20    6.65
 -12   2   4   39.58    6.75
 -12   2   4   47.01    7.46
  12   2  -4   29.19    5.06
  12  -2  -4   45.26    6.27
 -12   2   3   33.32    6.13
  12  -2  -3   25.14    4.70
 -12   2   2    9.73    4.01
  12   2  -2   18.91    3.95
  12  -2  -2   19.25    4.28
 -12   2   1  786.63   32.15
  12   2  -1  753.76   26.66
  12  -2  -1  734.74   27.26
 -12   2   0    1.19    3.12
 -12   2   0    7.71    3.53
  12   2   0   10.35    2.82
  12  -2   0   10.26    3.23
 -12   2  -1  355.44   20.30
  12  -2   1  367.96   16.33
 -12   2  -2   16.78    4.74
  12   2   2    6.92    2.26
  12  -2   2   14.80    3.10
 -12   2  -3   36.16    6.58
  12   2   3   38.63    4.46
  12  -2   3   46.14    5.12
 -12  -2  -4  145.67    8.69
 -12   2  -4  141.47   12.94
  12   2   4  149.39    8.22
  12  -2   4  140.77    8.61
 -12   2  -5   66.44    8.93
  12  -2   5   74.39    5.72
  12   2   6   11.04    3.61
  12  -2   6   10.46    1.72
  12  -2   6   11.15    2.38
  12   2   7  305.65   16.93
  12  -2   7  294.45   10.44
  12  -2   7  274.60   10.34
  12   2   8   16.66    4.45
  12   2   9  361.98   18.64
  12   2  10   16.09    3.85
  12   2  11   -0.83    1.87
  12   2  12   29.99    5.28
  12   2  13  206.70   13.29
  12   2  14    5.49    3.16
  12   2  15  249.05   14.53
  12  -3 -12   10.24    3.55
  12  -3 -11  469.98   22.19
  12  -3 -10    6.02    3.08
  12   3 -10    6.64    3.69
  12  -3 -10    1.17    2.87
  12  -3  -9   28.72    5.30
  12   3  -9   37.21    6.63
  12  -3  -9   33.10    6.36
  12  -3  -8   -0.78    2.79
  12   3  -8    1.02    2.83
  12  -3  -8    1.11    2.90
  12  -3  -7    3.69    2.64
  12   3  -7   -0.97    2.70
  12  -3  -7    3.23    2.82
  12  -3  -6   29.88    4.91
  12   3  -6   33.42    5.74
  12  -3  -5  728.92   25.49
  12   3  -5  655.86   27.17
  12  -3  -5  654.03   28.53
  12  -3  -4   22.45    4.12
  12   3  -4   30.33    5.42
  12  -3  -4   25.25    5.56
  12  -3  -3  162.55   10.02
  12   3  -3  189.31   12.52
  12  -3  -3  185.23   13.31
  12  -3  -2   23.73    3.60
  12   3  -2   22.37    4.42
  12  -3  -2   23.31    5.06
  12  -3  -1  181.06    9.60
  12   3  -1  163.01   11.30
  12  -3  -1  173.54   12.32
  12  -3   0    8.70    2.10
  12   3   0    9.13    2.76
  12  -3   0    6.51    3.10
  12   3   1  126.32    9.24
  12  -3   1  133.75   10.23
  12  -3   2   25.38    2.85
  12   3   2   25.53    4.16
  12  -3   2   23.14    4.41
  12   3   3  281.60   13.38
  12  -3   3  263.51   14.07
  12  -3   4    8.81    2.67
  12   3   5  300.07   18.40
  12  -3   5  308.14   14.39
  12   3   6   74.95    9.13
  12  -3   6   73.59    6.34
  12   3   7    1.03    2.34
  12   3   8   33.36    6.02
  12   3   9   29.03    5.95
  12  -4 -11   50.73    7.53
  12  -4 -10  174.97   12.70
  12  -4  -9   48.87    6.82
  12  -4  -8  111.07    9.41
  12  -4  -7   78.74    7.91
  12   4  -6   84.97    9.38
  12   4  -5    1.96    2.55
 -12  -4   5    1.02    2.30
  12   4  -4  173.15   13.06
 -12  -4   4  173.82   13.56
  12   4  -3   32.39    5.67
 -12  -4   3   26.84    5.42
  12   4  -2  147.35   11.42
  12   4  -1  156.73   11.56
  12   4   0   45.14    6.18
  12   4   1   39.96    5.66
  13   0 -12   -1.13    2.95
  13   0 -11   -2.18    4.50
  13   0 -10   -1.05    2.56
  13   0  -9  377.34   20.32
  13   0  -8    0.96    2.95
  13   0  -7  688.47   28.17
  13   0  -6    1.75    2.55
  13   0  -5  273.98   15.57
 -13   0   4   -0.86    2.10
  13   0  -4    1.55    1.76
 -13   0   3   66.68    7.75
  13   0  -3   58.23    6.76
 -13   0   2   -1.73    2.53
  13   0  -2   -0.68    2.08
 -13   0   1  145.69   11.36
  13   0  -1  148.93   10.01
 -13   0   0    0.88    2.69
  13   0   0    1.72    1.91
 -13   0  -1 1008.94   35.21
  13   0   1  947.93   29.60
 -13   0  -2    2.69    2.49
  13   0   2   -0.46    1.54
 -13   0  -3   16.31    4.20
  13   0   3   16.92    2.78
 -13   0  -4   -0.91    2.23
  13   0   4    0.66    1.22
 -13   0  -5   12.99    4.12
  13   0   6   -0.65    2.00
 -13   0  -6    0.94    3.01
  13   0   7  852.34   28.64
 -13   0  -7  879.29   33.22
  13   0   8    0.58    2.00
 -13   0  -9  216.27   14.90
 -13   0 -10    0.99    4.09
  13   1 -11  512.15   25.25
  13  -1 -11  480.37   24.39
  13  -1 -10   22.32    5.59
  13   1 -10   38.84    6.75
  13   1  -9   65.27    8.50
  13  -1  -9   83.74    9.28
  13   1  -8  194.62   13.86
  13  -1  -8  199.37   14.11
 -13   1   7   19.66    4.65
  13   1  -7   15.52    4.32
  13  -1  -7   24.30    5.05
 -13   1   6  118.26   11.09
  13   1  -6  118.51   10.23
  13  -1  -6  127.69   10.66
 -13   1   5  327.95   18.76
  13   1  -5  332.20   17.39
  13  -1  -5  351.20   17.96
 -13   1   4    0.99    2.60
  13   1  -4    0.77    2.25
  13  -1  -4    0.81    2.24
 -13   1   3  128.16   11.44
  13   1  -3  147.70   10.47
  13  -1  -3  129.58   10.14
 -13   1   2   42.33    6.79
  13   1  -2   54.13    6.08
  13  -1  -2   46.50    5.89
 -13  -1   1   97.25    8.58
 -13   1   1  119.63   10.97
  13   1  -1  110.90    8.48
  13  -1  -1  100.06    8.35
 -13  -1   0  186.67   11.90
 -13   1   0  191.38   14.27
  13  -1   0  198.08   11.39
  13   1   0  180.70   10.66
 -13  -1  -1   86.03    8.05
 -13   1  -1   79.82    9.49
  13   1   1  103.99    7.52
  13  -1   1   91.66    7.43
 -13   1  -2  188.11   14.10
 -13  -1  -2  178.50   11.72
  13   1   2  176.25    9.60
  13  -1   2  183.29   10.10
 -13   1  -3   81.62    9.40
 -13  -1  -3   73.20    7.40
  13   1   3   80.91    5.94
  13  -1   3   80.84    6.16
 -13   1  -4   32.11    6.31
 -13  -1  -4   39.80    5.66
  13  -1   4   41.23    4.10
  13   1   4   43.57    4.03
 -13   1  -5  535.74   25.55
 -13  -1  -5  476.83   20.84
  13  -1   6  123.32    7.94
  13   1   6  120.54    9.98
 -13   1  -6  116.68   11.47
  13   1   7    4.68    2.70
 -13   1  -7    8.84    3.96
  13   1   8   98.22    8.79
 -13   1  -8  105.82   10.96
  13   1   9   60.59    6.80
  13   1  10  152.05   10.79
  13   2 -10  331.92   19.61
  13  -2 -10  333.56   19.98
  13   2  -9   27.88    5.84
  13  -2  -9   33.13    6.58
  13   2  -8    0.99    2.42
  13  -2  -8    2.07    3.17
  13   2  -7   17.92    4.55
  13  -2  -7   24.80    5.36
  13   2  -6   27.80    5.33
  13  -2  -6   23.76    5.22
  13   2  -5   45.04    6.40
  13  -2  -5   42.65    6.40
  13   2  -4  845.10   30.88
  13  -2  -4  843.42   31.37
  13   2  -3   39.45    5.60
  13  -2  -3   25.58    4.81
  13   2  -2  174.74   11.49
  13  -2  -2  194.92   12.61
  13   2  -1   63.05    6.57
  13  -2  -1   63.46    7.05
  13   2   0    8.76    3.00
  13  -2   0    2.08    2.12
  13   2   1  110.84    8.23
  13  -2   1  102.90    8.36
  13   2   2  182.86   10.38
  13  -2   2  202.81   11.37
  13   2   3    7.48    2.25
  13  -2   3    7.47    2.52
  13   2   5   11.74    3.95
  13   2   6  469.94   22.61
  13   2   7   48.26    6.99
  13   2   8    8.10    3.53
  13   2   9   48.58    6.81
  13   2  10   83.85    8.68
  13   2  11    8.43    3.49
  13  -3 -10  351.01   18.64
  13  -3  -9   47.46    7.00
  13  -3  -8  410.14   19.63
  13  -3  -7    0.75    2.93
  13   3  -7   -0.98    2.22
  13  -3  -6  460.12   19.93
  13   3  -6  478.96   22.66
  13  -3  -6  439.47   22.72
  13   3  -5   59.93    7.48
  13  -3  -5   49.97    7.31
  13   3  -4   44.66    6.56
  13  -3  -4   42.17    6.75
  13   3  -3   47.48    6.42
  13  -3  -3   53.19    7.02
  13   3  -2   42.98    6.11
  13  -3  -2   43.66    6.42
  13   3  -1   58.07    6.78
  13  -3  -1   56.41    7.05
  13   3   0  571.83   22.51
  13  -3   0  557.21   23.45
  13   3   1    2.59    2.24
  13  -3   1   -1.49    2.38
  13  -3   2  191.23   11.96
  13   4  -4  211.35   14.64
  13   4  -3   17.87    4.83
  13   4  -2   84.17    8.72
  14   0  -9   -2.05    4.12
  14   0  -8   26.48    5.54
  14   0  -7    0.93    2.73
  14   0  -6   38.23    6.36
  14   0  -5   -1.68    2.91
  14   0  -4  297.67   16.39
 -14   0   3   -0.90    3.10
  14   0  -3    0.74    2.05
 -14   0   2  153.45   12.21
  14   0  -2  176.68   11.31
 -14   0   1   -0.91    2.65
  14   0  -1   -0.63    1.66
 -14   0   0  164.77   12.55
 -14   0  -1    0.92    3.06
 -14   0  -2  815.72   31.54
 -14   0  -3   -0.94    3.78
 -14   0  -4  428.04   21.51
  14   1  -9  133.79   11.76
  14   1  -8   71.09    8.57
  14  -1  -8   90.67    9.63
  14   1  -7   14.83    4.21
  14  -1  -7   24.82    5.23
  14   1  -6  173.77   12.78
  14  -1  -6  181.67   13.06
  14   1  -5   32.46    5.58
  14  -1  -5   26.97    4.99
  14   1  -4   22.90    4.93
  14  -1  -4   36.37    5.65
  14  -1  -3  306.85   16.39
  14   1  -3  303.23   15.82
  14   1  -2  142.37   10.14
  14  -1  -2  117.24    9.60
  14  -1  -1  120.19    9.28
  14   1  -1  125.93    9.17
  14   1   5   87.81    8.81
  14   1   6   85.38    8.79
  14   2  -7  296.00   17.41
  14  -2  -7  279.82   17.38
  14   2  -6    0.91    2.22
  14  -2  -6    2.88    2.66
  14   2  -5  300.85   16.64
  14  -2  -5  298.73   17.24
  14   2  -4   68.96    7.73
  14  -2  -4   57.88    7.33
  14   2  -3    4.58    2.55
  14  -2  -3   14.15    3.92
  14   2  -2    3.57    2.38
  14  -2  -2    6.31    2.91
  14   3  -5   95.96    9.50
  14  -3  -4    4.73    3.03
   0   0   0    0.00    0.00


TITL TH_AK_B1_mo_autored in P2(1)/n
REM P2(1)/n (#14 in standard setting)
CELL 0.71073  10.618954   6.032394  23.957075  90.0000  95.2437  90.0000
ZERR    4.00   0.000226   0.000149   0.000576   0.0000   0.0023   0.0000
LATT  1
SYMM -x+1/2, y+1/2,-z+1/2
SFAC C H N O F S I
UNIT 60.00 44.00 4.00 8.00 8.00 4.00 4.00
REM  CrysAlisPro recorded range (K): Min=100.0; max=100.0; aver:100.0
TEMP -173
SIZE 0.10 0.21 0.26
TREF
HKLF 4
END
_computing_structure_solution     'SHELXT 2014/5 (Sheldrick, 2014)'
_computing_structure_solution     'SHELXT 2014/5 (Sheldrick, 2014)'
;
_shelx_hkl_checksum                93319
_olex2_submission_special_instructions  'No special instructions were received'
_oxdiff_exptl_absorpt_empirical_details
;
Empirical correction (ABSPACK) includes:
- Absorption correction using spherical harmonics
- Frame scaling
;
_oxdiff_exptl_absorpt_empirical_full_max  1.382
_oxdiff_exptl_absorpt_empirical_full_min  0.857
