# Supplementary material for: Halogen Bonding in Sulphonamide Co-Crystals: X···π Preferred over X···O/N?
Source: Molecules. 2023 Aug 6;28(15):5910. doi: 10.3390/molecules28155910 (PMC10420850; doi:10.3390/molecules28155910)
Supplement: Supplementary file 1 [file molecules-28-05910-s001.zip › 5-SM052_3-CPA_14DITFB.cif]

data_sm052_3-cpa_14ditfb
_publcif_datablock.id '{8377612c-0823-47e7-87ae-7aae93bd6825}'
loop_
_publcif_info_datablock.id
_publcif_info_datablock.publ_exptl
_publcif_info_datablock.publ_geom
_publcif_info_datablock.structure
'{8377612c-0823-47e7-87ae-7aae93bd6825}' y y y

_audit_update_record
;
2022-02-17 # Formatted by publCIF

;

# publcif _publ_body_element loop start
loop_
_publ_body_element
_publ_body_title
_publ_body_contents

 section 
;
Introduction
; 
;

;
 section 
;
Experimental
; 
;

;
 subsection 
;
Synthesis and crystallization
; 
;

;
 subsection 
;
Refinement
;
;
Crystal data, data collection and structure refinement details are summarized
in Table 1.
;

 section 
;
Results and discussion
; 
;

;
# publcif _publ_body_element loop end
_audit_creation_date               2022-02-17
_audit_creation_method
;
Olex2 1.3
(compiled 2020.11.12 svn.r5f609507 for OlexSys, GUI svn.r6408)
;
_shelx_SHELXL_version_number       '2017/1'
_audit_contact_author_address      ?
_audit_contact_author_email        ?
_audit_contact_author_name         ''
_audit_contact_author_phone        ?
_publ_contact_author_id_orcid      ?
_publ_section_references
;
Dolomanov, O. V., Bourhis, L. J., Gildea, R. J., Howard, J. A. K. & Puschmann,
H. (2009). <i>J. Appl. Cryst.</i> <b>42</b>, 339--341.

Sheldrick, G. M. (2008). <i>Acta Cryst.</i> A<b>64</b>, 112--122.
;
_chemical_name_common              ?
_chemical_name_systematic          ?
_chemical_formula_moiety           'C3 F2 I, C10 H13 Cl N2 O3 S'
_chemical_formula_sum              'C13 H13 Cl F2 I N2 O3 S'
_chemical_formula_weight           477.66
_chemical_melting_point            ?
loop_
  _atom_type_symbol
  _atom_type_description
  _atom_type_scat_dispersion_real
  _atom_type_scat_dispersion_imag
  _atom_type_scat_source
 'C' 'C' 0.0181 0.0091 'International Tables Vol C Tables 4.2.6.8 and 6.1.1.4'
 'H' 'H' 0.0000 0.0000 'International Tables Vol C Tables 4.2.6.8 and 6.1.1.4'
 'Cl' 'Cl' 0.3639 0.7018 'International Tables Vol C Tables 4.2.6.8 and 6.1.1.4'
 'F' 'F' 0.0727 0.0534 'International Tables Vol C Tables 4.2.6.8 and 6.1.1.4'
 'I' 'I' -0.3257 6.8362 'International Tables Vol C Tables 4.2.6.8 and 6.1.1.4'
 'N' 'N' 0.0311 0.0180 'International Tables Vol C Tables 4.2.6.8 and 6.1.1.4'
 'O' 'O' 0.0492 0.0322 'International Tables Vol C Tables 4.2.6.8 and 6.1.1.4'
 'S' 'S' 0.3331 0.5567 'International Tables Vol C Tables 4.2.6.8 and 6.1.1.4'

_shelx_space_group_comment
;
The symmetry employed for this shelxl refinement is uniquely defined
by the following loop, which should always be used as a source of
symmetry information in preference to the above space-group names.
They are only intended as comments.
;
_space_group_crystal_system        monoclinic
_space_group_IT_number             14
_space_group_name_H-M_alt          'P 1 21/n 1'
_space_group_name_Hall             '-P 2yn'
loop_
  _space_group_symop_operation_xyz
 'x, y, z'
 '-x+1/2, y+1/2, -z+1/2'
 '-x, -y, -z'
 'x-1/2, -y-1/2, z-1/2'

_cell_length_a                     13.14950(10)
_cell_length_b                     8.96850(10)
_cell_length_c                     14.61480(10)
_cell_angle_alpha                  90
_cell_angle_beta                   102.8420(10)
_cell_angle_gamma                  90
_cell_volume                       1680.43(3)
_cell_formula_units_Z              4
_cell_measurement_reflns_used      19258
_cell_measurement_temperature      100.00(10)
_cell_measurement_theta_max        79.0140
_cell_measurement_theta_min        4.0740
_shelx_estimated_absorpt_T_max     0.141
_shelx_estimated_absorpt_T_min     0.039
_exptl_absorpt_coefficient_mu      17.934
_exptl_absorpt_correction_T_max    0.48501
_exptl_absorpt_correction_T_min    0.43273
_exptl_absorpt_correction_type     sphere
_exptl_absorpt_process_details
;
CrysAlisPro 1.171.41.98a (Rigaku Oxford Diffraction, 2021)
Spherical absorption correction
using equivalent radius and absorption coefficient.
Empirical absorption correction using spherical harmonics,
implemented in SCALE3 ABSPACK scaling algorithm.
;
_exptl_absorpt_special_details     ?
_exptl_crystal_colour              'clear colourless'
_exptl_crystal_colour_lustre       clear
_exptl_crystal_colour_primary      colourless
_exptl_crystal_density_diffrn      1.888
_exptl_crystal_density_meas        ?
_exptl_crystal_density_method      ?
_exptl_crystal_description         sphere
_exptl_crystal_F_000               932
loop_
  _exptl_crystal_face_index_h
  _exptl_crystal_face_index_k
  _exptl_crystal_face_index_l
  _exptl_crystal_face_perp_dist
 -1 1 9 0.0757
 -4 5 -1 0.1951
 -1 1 -9 0.0805
 -7 1 7 0.0905
 6 1 -8 0.0874
 7 -1 -7 0.0884
 -2 -5 5 0.2115
 -6 -1 8 0.1159
 1 5 -4 0.1925
 5 0 7 0.0760
 -5 1 -6 0.1042
 -4 -1 -7 0.1044
 -1 -1 -9 0.1099
 3 -2 7 0.1153
 -8 0 1 0.0870
 8 2 0 0.0999

_exptl_crystal_size_max            0.51
_exptl_crystal_size_mid            0.18
_exptl_crystal_size_min            0.18
_exptl_crystal_size_rad            0.128
_exptl_transmission_factor_max     ?
_exptl_transmission_factor_min     ?
_diffrn_reflns_av_R_equivalents    0.0630
_diffrn_reflns_av_unetI/netI       0.0275
_diffrn_reflns_Laue_measured_fraction_full  1.000
_diffrn_reflns_Laue_measured_fraction_max  0.919
_diffrn_reflns_limit_h_max         15
_diffrn_reflns_limit_h_min         -15
_diffrn_reflns_limit_k_max         10
_diffrn_reflns_limit_k_min         -10
_diffrn_reflns_limit_l_max         17
_diffrn_reflns_limit_l_min         -17
_diffrn_reflns_number              24561
_diffrn_reflns_point_group_measured_fraction_full  1.000
_diffrn_reflns_point_group_measured_fraction_max  0.919
_diffrn_reflns_theta_full          67.684
_diffrn_reflns_theta_max           79.035
_diffrn_reflns_theta_min           5.128
_diffrn_ambient_temperature        100.15
_diffrn_detector_area_resol_mean   10.0000
_diffrn_detector_type              HyPix
_diffrn_measured_fraction_theta_full  1.000
_diffrn_measured_fraction_theta_max  0.919
_diffrn_measurement_details
;
List of Runs (angles in degrees, time in seconds):

  # Type    Start    End  Width  t~exp~   \w     \q     \k     \f   Frames
--------------------------------------------------------------------------
  1  \w     51.00 102.00   0.50    0.05    --   51.23  38.00 120.00  102
  2  \w     60.00  86.00   0.50    0.05    --   51.23  40.00  56.00   52
  3  \w    106.00 156.00   0.50    0.14    --  109.96  40.00  56.00  100
  4  \w     68.00 113.00   0.50    0.14    --  109.96   0.00  90.00   90
  5  \w      4.00  38.00   0.50    0.05    --   51.23   0.00  60.00   68
  6  \w     39.00 106.00   0.50    0.14    --  109.96 -99.00 -90.00  134
  7  \w     39.00  97.00   0.50    0.14    --  109.96 -77.00 -60.00  116
  8  \w    -17.00  31.00   0.50    0.05    --   51.23 -40.00 -97.00   96
  9  \w     63.00  89.00   0.50    0.14    --  109.96 -77.00  90.00   52
 10  \w     86.00 111.00   0.50    0.14    --  109.96-125.00 150.00   50
 11  \w     40.00  65.00   0.50    0.14    --  109.96-125.00 150.00   50
 12  \w    -14.00  35.00   0.50    0.05    --   51.23 -38.00 150.00   98
 13  \w    -61.00 -18.00   0.50    0.14    --  -90.00  57.00-120.00   86
 14  \w    -70.00 -32.00   0.50    0.14    --  -90.00  57.00-180.00   76
 15  \w    -56.00 -30.00   0.50    0.14    --  -90.00  57.00 -90.00   52
 16  \w    -48.00 -23.00   0.50    0.14    --  -90.00  38.00-120.00   50
 17  \w    -48.00 -19.00   0.50    0.14    --  -90.00  38.00  30.00   58
 18  \w    -50.00 -19.00   0.50    0.14    --  -90.00  40.00  56.00   62
 19  \w    -46.00 -21.00   0.50    0.14    --  -90.00  38.00  90.00   50
 20  \w    -46.00 -19.00   0.50    0.14    --  -90.00  38.00 120.00   54
 21  \w    -31.00  11.00   0.50    0.05    --  -51.23  40.00  56.00   84
 22  \w    -48.00 -23.00   0.50    0.14    --  -90.00  38.00-180.00   50
 23  \w    -47.00 -22.00   0.50    0.14    --  -90.00  38.00-150.00   50
 24  \w    -71.00 -24.00   0.50    0.14    --  -90.00 125.00 150.00   94
 25  \w   -122.00 -34.00   0.50    0.05    --  -51.23 -77.00 120.00  176
 26  \w    -64.00 -33.00   0.50    0.05    --  -51.23 -77.00-180.00   62
 27  \w   -122.00 -94.00   0.50    0.05    --  -51.23 -77.00-180.00   56
 28  \w    -95.00 -70.00   0.50    0.14    --  -90.00 -77.00-175.21   50
 29  \w    -97.00 -71.00   0.50    0.14    --  -90.00 -77.00-180.00   52
 30  \w   -159.00-121.00   0.50    0.14    --  -90.00 -77.00-175.21   76
 31  \w   -158.00-133.00   0.50    0.14    --  -90.00 -77.00-150.00   50
 32  \w   -124.00 -71.00   0.50    0.14    --  -90.00 -77.00-150.00  106
 33  \w   -138.00 -74.00   0.50    0.14    --  -90.00 -73.00 120.37  128
 34  \w   -154.00-128.00   0.50    0.14    --  -90.00 -77.00 150.00   52
 35  \w   -145.00-119.00   0.50    0.14    --  -90.00 -73.00 165.72   52
 36  \w    -99.00 -73.00   0.50    0.14    --  -90.00 -77.00 150.00   52
 37  \w   -102.00 -76.00   0.50    0.14    --  -90.00 -66.00 146.06   52
 38  \w    -97.00 -72.00   0.50    0.14    --  -90.00 -73.00 165.72   50
 39  \w   -102.00 -77.00   0.50    0.14    --  -90.00 -60.00 177.91   50
 40  \w   -107.00 -77.00   0.50    0.14    --  -90.00 -65.00 139.12   60
 41  \w   -154.00 -80.00   0.50    0.14    --  -90.00 -53.00 142.28  148
 42  \w   -130.00 -76.00   0.50    0.14    --  -90.00 -63.00 121.88  108
 43  \w   -123.00 -78.00   0.50    0.05    --  -51.23 -40.00 -97.00   90
 44  \w    -72.00 -46.00   0.50    0.05    --  -51.23 -40.00 -97.00   52
 45  \w   -101.00 -76.00   0.50    0.14    --  -90.00 -69.00-172.82   50
 46  \w   -145.00-119.00   0.50    0.14    --  -90.00 -69.00-172.82   52
 47  \w   -161.00 -82.00   0.50    0.14    --  -90.00 -57.00-150.00  158
 48  \w   -154.00 -84.00   0.50    0.14    --  -90.00 -40.00 -97.00  140
 49  \w   -161.00-130.00   0.50    0.14    --  -90.00 -38.00 -30.00   62
 50  \w   -125.00 -92.00   0.50    0.14    --  -90.00 -38.00 -30.00   66
;
_diffrn_measurement_device         'four-circle diffractometer'
_diffrn_measurement_device_type    'XtaLAB Synergy, Dualflex, HyPix'
_diffrn_measurement_method         '\w scans'
_diffrn_radiation_type             CuK\a
_diffrn_radiation_wavelength       1.54184
_diffrn_source                     ?
_reflns_Friedel_coverage           0.000
_reflns_Friedel_fraction_full      .
_reflns_Friedel_fraction_max       .
_reflns_number_gt                  3286
_reflns_number_total               3342
_reflns_special_details
;
 Reflections were merged by SHELXL according to the crystal
 class for the calculation of statistics and refinement.
 
 _reflns_Friedel_fraction is defined as the number of unique
 Friedel pairs measured divided by the number that would be
 possible theoretically, ignoring centric projections and
 systematic absences.
;
_reflns_threshold_expression       'I > 2\s(I)'
_computing_cell_refinement         'CrysAlisPro 1.171.41.98a (Rigaku OD, 2021)'
_computing_data_collection         'CrysAlisPro 1.171.41.98a (Rigaku OD, 2021)'
_computing_data_reduction          'CrysAlisPro 1.171.41.98a (Rigaku OD, 2021)'
_computing_molecular_graphics      'Olex2 1.3 (Dolomanov et al., 2009)'
_computing_publication_material    'Olex2 1.3 (Dolomanov et al., 2009)'
_computing_structure_refinement    'XL  (Sheldrick, 2008)'
_computing_structure_solution      'olex2.solve 1.3 (Bourhis et al., 2015)'
_refine_diff_density_max           1.027
_refine_diff_density_min           -2.258
_refine_diff_density_rms           0.158
_refine_ls_extinction_coef         .
_refine_ls_extinction_method       none
_refine_ls_goodness_of_fit_ref     0.997
_refine_ls_hydrogen_treatment      mixed
_refine_ls_matrix_type             full
_refine_ls_number_parameters       225
_refine_ls_number_reflns           3342
_refine_ls_number_restraints       24
_refine_ls_R_factor_all            0.0384
_refine_ls_R_factor_gt             0.0380
_refine_ls_restrained_S_all        1.005
_refine_ls_shift/su_max            0.001
_refine_ls_shift/su_mean           0.000
_refine_ls_structure_factor_coef   Fsqd
_refine_ls_weighting_details      
 'w=1/[\s^2^(Fo^2^)+(0.0676P)^2^+4.3212P] where P=(Fo^2^+2Fc^2^)/3'
_refine_ls_weighting_scheme        calc
_refine_ls_wR_factor_gt            0.0988
_refine_ls_wR_factor_ref           0.0992
_refine_special_details            ?
_olex2_refinement_description
;
1. Fixed Uiso
 At 1.2 times of:
  All C(H) groups, All C(H,H) groups, All N(H) groups
 At 1.5 times of:
  All C(H,H,H) groups
2. Uiso/Uaniso restraints and constraints
Uanis(C12) \\sim Ueq, Uanis(C11) \\sim Ueq, Uanis(C13) \\sim Ueq, Uanis(C7)
\\sim Ueq: with sigma of 0.005 and sigma for terminal atoms of 0.01
3. Others
 Sof(I1B)=1-FVAR(1)
 Sof(I1A)=FVAR(1)
4.a Secondary CH2 refined with riding coordinates:
 C9(H9A,H9B), C8(H8A,H8B)
4.b Aromatic/amide H refined with riding coordinates:
 C2(H2), C3(H3), C5(H5), C6(H6)
4.c Idealised Me refined as rotating group:
 C10(H10A,H10B,H10C)
;
_atom_sites_solution_hydrogens     mixed
_atom_sites_solution_primary       ?
_atom_sites_solution_secondary     ?
loop_
  _atom_site_label
  _atom_site_type_symbol
  _atom_site_fract_x
  _atom_site_fract_y
  _atom_site_fract_z
  _atom_site_U_iso_or_equiv
  _atom_site_adp_type
  _atom_site_occupancy
  _atom_site_site_symmetry_order
  _atom_site_calc_flag
  _atom_site_refinement_flags_posn
  _atom_site_refinement_flags_adp
  _atom_site_refinement_flags_occupancy
  _atom_site_disorder_assembly
  _atom_site_disorder_group
 I1A I 0.52557(13) 0.1877(4) 0.86408(16) 0.0238(3) Uani 0.87(2) 1 d . . P A 1
 Cl1 Cl 0.78178(6) -0.00115(12) 0.69576(6) 0.0250(2) Uani 1 1 d . . . . .
 F1 F 0.52472(19) 0.2257(3) 1.07971(17) 0.0295(5) Uani 1 1 d . . . . .
 O3 O 0.28143(18) -0.1227(3) 0.76840(15) 0.0140(5) Uani 1 1 d . . . . .
 F2 F 0.48977(16) 0.5384(3) 0.81392(14) 0.0272(5) Uani 1 1 d . . . . .
 C2 C 0.4903(2) 0.1289(4) 0.5875(2) 0.0139(6) Uani 1 1 d . . . . .
 H2 H 0.456027 0.207684 0.549302 0.017 Uiso 1 1 calc R U . . .
 N2 N 0.2481(2) 0.0953(3) 0.83623(18) 0.0121(5) Uani 1 1 d . . . . .
 H2A H 0.242(4) 0.183(5) 0.827(3) 0.015 Uiso 1 1 d . U . . .
 C11 C 0.5091(2) 0.3745(4) 0.9438(2) 0.0178(7) Uani 1 1 d . U . . .
 C13 C 0.4961(2) 0.5172(5) 0.9063(2) 0.0188(7) Uani 1 1 d . U . . .
 C3 C 0.5990(3) 0.1217(4) 0.6108(2) 0.0169(7) Uani 1 1 d . . . . .
 H3 H 0.639546 0.195364 0.588552 0.020 Uiso 1 1 calc R U . . .
 C1 C 0.4325(2) 0.0198(4) 0.6206(2) 0.0107(6) Uani 1 1 d . . . . .
 C10 C 0.1563(3) -0.0267(4) 1.0550(2) 0.0220(8) Uani 1 1 d . . . . .
 H10A H 0.186466 -0.127077 1.063028 0.033 Uiso 1 1 calc R U . . .
 H10B H 0.086791 -0.028347 1.069061 0.033 Uiso 1 1 calc R U . . .
 H10C H 0.201206 0.042348 1.097812 0.033 Uiso 1 1 calc R U . . .
 C9 C 0.1474(3) 0.0244(4) 0.9539(2) 0.0159(7) Uani 1 1 d . . . . .
 H9A H 0.113226 0.123309 0.944904 0.019 Uiso 1 1 calc R U . . .
 H9B H 0.103365 -0.046796 0.910629 0.019 Uiso 1 1 calc R U . . .
 C8 C 0.2546(2) 0.0344(4) 0.9302(2) 0.0131(6) Uani 1 1 d . . . . .
 H8A H 0.300537 0.098741 0.976943 0.016 Uiso 1 1 calc R U . . .
 H8B H 0.286218 -0.066200 0.934057 0.016 Uiso 1 1 calc R U . . .
 C5 C 0.5899(3) -0.1036(4) 0.7003(2) 0.0170(7) Uani 1 1 d . . . . .
 H5 H 0.624598 -0.181763 0.738907 0.020 Uiso 1 1 calc R U . . .
 C6 C 0.4814(2) -0.0972(4) 0.6766(2) 0.0141(6) Uani 1 1 d . . . . .
 H6 H 0.441057 -0.171618 0.698388 0.017 Uiso 1 1 calc R U . . .
 C12 C 0.5128(3) 0.3604(4) 1.0392(2) 0.0184(7) Uani 1 1 d . U . . .
 N1 N 0.2578(2) 0.0937(3) 0.68217(17) 0.0100(5) Uani 1 1 d . . . . .
 H1 H 0.243(4) 0.184(5) 0.685(3) 0.012 Uiso 1 1 d . U . . .
 C4 C 0.6468(2) 0.0062(4) 0.6665(2) 0.0160(7) Uani 1 1 d . . . . .
 S1 S 0.29506(5) 0.03117(8) 0.58930(5) 0.00884(17) Uani 1 1 d . . . . .
 O2 O 0.26732(17) 0.1482(3) 0.52186(15) 0.0131(4) Uani 1 1 d . . . . .
 O1 O 0.25497(17) -0.1160(3) 0.56801(15) 0.0128(4) Uani 1 1 d . . . . .
 C7 C 0.2634(2) 0.0135(4) 0.7651(2) 0.0101(6) Uani 1 1 d . U . . .
 I1B I 0.5206(12) 0.218(3) 0.8481(17) 0.025(3) Uani 0.13(2) 1 d . . P A 2

loop_
  _atom_site_aniso_label
  _atom_site_aniso_U_11
  _atom_site_aniso_U_22
  _atom_site_aniso_U_33
  _atom_site_aniso_U_23
  _atom_site_aniso_U_13
  _atom_site_aniso_U_12
 I1A 0.0087(2) 0.0382(6) 0.0232(4) -0.0125(4) 0.0008(2) -0.0024(3)
 Cl1 0.0043(4) 0.0570(6) 0.0128(4) -0.0057(3) 0.0003(3) 0.0003(3)
 F1 0.0228(12) 0.0382(13) 0.0283(12) 0.0068(10) 0.0076(10) 0.0055(10)
 O3 0.0144(11) 0.0193(11) 0.0092(10) 0.0005(9) 0.0046(8) 0.0001(9)
 F2 0.0130(10) 0.0598(15) 0.0090(9) 0.0022(9) 0.0027(7) 0.0075(10)
 C2 0.0074(14) 0.0246(17) 0.0098(14) -0.0015(12) 0.0026(11) 0.0001(12)
 N2 0.0127(13) 0.0173(14) 0.0069(12) 0.0019(10) 0.0035(10) 0.0001(11)
 C11 0.0032(13) 0.0349(18) 0.0142(14) -0.0066(13) -0.0002(11) 0.0018(13)
 C13 0.0030(14) 0.043(2) 0.0100(14) -0.0005(13) 0.0006(11) 0.0020(13)
 C3 0.0094(16) 0.0308(19) 0.0124(15) -0.0019(13) 0.0066(12) -0.0051(13)
 C1 0.0065(14) 0.0215(16) 0.0047(13) -0.0024(11) 0.0027(11) 0.0008(12)
 C10 0.0266(19) 0.0316(19) 0.0124(16) 0.0031(14) 0.0140(14) 0.0053(15)
 C9 0.0094(15) 0.0294(18) 0.0103(15) 0.0012(13) 0.0052(12) 0.0002(13)
 C8 0.0100(15) 0.0258(17) 0.0037(13) 0.0003(12) 0.0018(11) -0.0014(12)
 C5 0.0100(15) 0.0291(18) 0.0109(14) 0.0023(13) 0.0003(12) 0.0066(13)
 C6 0.0083(15) 0.0251(17) 0.0094(14) -0.0008(12) 0.0031(11) -0.0011(12)
 C12 0.0055(14) 0.0304(17) 0.0187(16) 0.0012(14) 0.0015(12) 0.0028(13)
 N1 0.0089(12) 0.0166(14) 0.0055(11) -0.0013(10) 0.0040(9) 0.0016(10)
 C4 0.0050(14) 0.0349(19) 0.0082(14) -0.0069(13) 0.0014(11) 0.0016(13)
 S1 0.0039(3) 0.0189(4) 0.0038(3) 0.0001(3) 0.0012(2) 0.0000(3)
 O2 0.0085(11) 0.0241(11) 0.0064(10) 0.0034(9) 0.0010(8) 0.0016(9)
 O1 0.0108(11) 0.0192(11) 0.0081(10) -0.0029(8) 0.0014(8) -0.0011(9)
 C7 0.0017(13) 0.0207(15) 0.0076(13) -0.0011(11) 0.0006(10) -0.0020(11)
 I1B 0.017(2) 0.034(5) 0.026(4) -0.024(3) 0.009(2) -0.008(2)

_geom_special_details
;
 All esds (except the esd in the dihedral angle between two l.s. planes)
 are estimated using the full covariance matrix.  The cell esds are taken
 into account individually in the estimation of esds in distances, angles
 and torsion angles; correlations between esds in cell parameters are only
 used when they are defined by crystal symmetry.  An approximate (isotropic)
 treatment of cell esds is used for estimating esds involving l.s. planes.
;
loop_
  _geom_bond_atom_site_label_1
  _geom_bond_atom_site_label_2
  _geom_bond_distance
  _geom_bond_site_symmetry_2
  _geom_bond_publ_flag
 I1A C11 2.079(4) . ?
 Cl1 C4 1.732(3) . ?
 F1 C12 1.339(5) . ?
 O3 C7 1.244(4) . ?
 F2 C13 1.348(4) . ?
 C2 H2 0.9500 . ?
 C2 C3 1.396(4) . ?
 C2 C1 1.389(5) . ?
 N2 H2A 0.80(4) . ?
 N2 C8 1.463(4) . ?
 N2 C7 1.324(4) . ?
 C11 C13 1.388(6) . ?
 C11 C12 1.391(5) . ?
 C11 I1B 2.009(11) . ?
 C13 C12 1.376(5) 3_667 ?
 C3 H3 0.9500 . ?
 C3 C4 1.380(5) . ?
 C1 C6 1.398(5) . ?
 C1 S1 1.765(3) . ?
 C10 H10A 0.9800 . ?
 C10 H10B 0.9800 . ?
 C10 H10C 0.9800 . ?
 C10 C9 1.527(4) . ?
 C9 H9A 0.9900 . ?
 C9 H9B 0.9900 . ?
 C9 C8 1.527(4) . ?
 C8 H8A 0.9900 . ?
 C8 H8B 0.9900 . ?
 C5 H5 0.9500 . ?
 C5 C6 1.393(5) . ?
 C5 C4 1.392(5) . ?
 C6 H6 0.9500 . ?
 N1 H1 0.84(4) . ?
 N1 S1 1.641(3) . ?
 N1 C7 1.397(4) . ?
 S1 O2 1.431(2) . ?
 S1 O1 1.430(2) . ?

loop_
  _geom_angle_atom_site_label_1
  _geom_angle_atom_site_label_2
  _geom_angle_atom_site_label_3
  _geom_angle
  _geom_angle_site_symmetry_1
  _geom_angle_site_symmetry_3
  _geom_angle_publ_flag
 C3 C2 H2 120.2 . . ?
 C1 C2 H2 120.2 . . ?
 C1 C2 C3 119.5(3) . . ?
 C8 N2 H2A 120(3) . . ?
 C7 N2 H2A 117(3) . . ?
 C7 N2 C8 122.9(3) . . ?
 C13 C11 I1A 122.8(3) . . ?
 C13 C11 C12 117.0(3) . . ?
 C13 C11 I1B 113.0(10) . . ?
 C12 C11 I1A 120.3(3) . . ?
 C12 C11 I1B 130.0(10) . . ?
 F2 C13 C11 120.0(3) . . ?
 F2 C13 C12 118.2(3) . 3_667 ?
 C12 C13 C11 121.8(3) 3_667 . ?
 C2 C3 H3 120.5 . . ?
 C4 C3 C2 119.1(3) . . ?
 C4 C3 H3 120.5 . . ?
 C2 C1 C6 121.1(3) . . ?
 C2 C1 S1 118.5(2) . . ?
 C6 C1 S1 120.4(2) . . ?
 H10A C10 H10B 109.5 . . ?
 H10A C10 H10C 109.5 . . ?
 H10B C10 H10C 109.5 . . ?
 C9 C10 H10A 109.5 . . ?
 C9 C10 H10B 109.5 . . ?
 C9 C10 H10C 109.5 . . ?
 C10 C9 H9A 109.4 . . ?
 C10 C9 H9B 109.4 . . ?
 C10 C9 C8 111.2(3) . . ?
 H9A C9 H9B 108.0 . . ?
 C8 C9 H9A 109.4 . . ?
 C8 C9 H9B 109.4 . . ?
 N2 C8 C9 111.7(3) . . ?
 N2 C8 H8A 109.3 . . ?
 N2 C8 H8B 109.3 . . ?
 C9 C8 H8A 109.3 . . ?
 C9 C8 H8B 109.3 . . ?
 H8A C8 H8B 107.9 . . ?
 C6 C5 H5 120.5 . . ?
 C4 C5 H5 120.5 . . ?
 C4 C5 C6 119.0(3) . . ?
 C1 C6 H6 120.4 . . ?
 C5 C6 C1 119.3(3) . . ?
 C5 C6 H6 120.4 . . ?
 F1 C12 C11 120.0(3) . . ?
 F1 C12 C13 118.7(3) . 3_667 ?
 C13 C12 C11 121.3(4) 3_667 . ?
 S1 N1 H1 119(3) . . ?
 C7 N1 H1 115(3) . . ?
 C7 N1 S1 125.0(2) . . ?
 C3 C4 Cl1 118.8(3) . . ?
 C3 C4 C5 122.0(3) . . ?
 C5 C4 Cl1 119.2(3) . . ?
 N1 S1 C1 106.39(13) . . ?
 O2 S1 C1 108.07(14) . . ?
 O2 S1 N1 104.00(14) . . ?
 O1 S1 C1 108.05(14) . . ?
 O1 S1 N1 109.39(14) . . ?
 O1 S1 O2 120.16(14) . . ?
 O3 C7 N2 125.1(3) . . ?
 O3 C7 N1 120.8(3) . . ?
 N2 C7 N1 114.1(3) . . ?

loop_
  _geom_hbond_atom_site_label_D
  _geom_hbond_atom_site_label_H
  _geom_hbond_atom_site_label_A
  _geom_hbond_distance_DH
  _geom_hbond_distance_HA
  _geom_hbond_distance_DA
  _geom_hbond_angle_DHA
  _geom_hbond_site_symmetry_A
  _geom_hbond_publ_flag
 N1 H1 O3 0.84(4) 1.91(4) 2.724(4) 162(4) 2_556 yes

loop_
  _geom_torsion_atom_site_label_1
  _geom_torsion_atom_site_label_2
  _geom_torsion_atom_site_label_3
  _geom_torsion_atom_site_label_4
  _geom_torsion
  _geom_torsion_site_symmetry_1
  _geom_torsion_site_symmetry_2
  _geom_torsion_site_symmetry_3
  _geom_torsion_site_symmetry_4
  _geom_torsion_publ_flag
 I1A C11 C13 F2 2.5(4) . . . . ?
 I1A C11 C13 C12 -178.8(3) . . . 3_667 ?
 I1A C11 C12 F1 -1.5(4) . . . . ?
 I1A C11 C12 C13 178.8(3) . . . 3_667 ?
 C2 C3 C4 Cl1 -179.6(2) . . . . ?
 C2 C3 C4 C5 0.0(5) . . . . ?
 C2 C1 C6 C5 0.6(5) . . . . ?
 C2 C1 S1 N1 -103.7(3) . . . . ?
 C2 C1 S1 O2 7.5(3) . . . . ?
 C2 C1 S1 O1 138.9(2) . . . . ?
 C13 C11 C12 F1 179.7(3) . . . . ?
 C13 C11 C12 C13 0.0(5) . . . 3_667 ?
 C3 C2 C1 C6 -0.2(5) . . . . ?
 C3 C2 C1 S1 -179.6(2) . . . . ?
 C1 C2 C3 C4 -0.1(5) . . . . ?
 C10 C9 C8 N2 -175.2(3) . . . . ?
 C8 N2 C7 O3 2.4(5) . . . . ?
 C8 N2 C7 N1 -177.5(3) . . . . ?
 C6 C1 S1 N1 76.9(3) . . . . ?
 C6 C1 S1 O2 -172.0(2) . . . . ?
 C6 C1 S1 O1 -40.5(3) . . . . ?
 C6 C5 C4 Cl1 180.0(2) . . . . ?
 C6 C5 C4 C3 0.4(5) . . . . ?
 C12 C11 C13 F2 -178.7(3) . . . . ?
 C12 C11 C13 C12 0.0(5) . . . 3_667 ?
 C4 C5 C6 C1 -0.7(5) . . . . ?
 S1 C1 C6 C5 180.0(2) . . . . ?
 S1 N1 C7 O3 -12.3(4) . . . . ?
 S1 N1 C7 N2 167.6(2) . . . . ?
 C7 N2 C8 C9 -109.0(3) . . . . ?
 C7 N1 S1 C1 -69.9(3) . . . . ?
 C7 N1 S1 O2 176.1(2) . . . . ?
 C7 N1 S1 O1 46.5(3) . . . . ?
 I1B C11 C13 F2 1.7(6) . . . . ?
 I1B C11 C13 C12 -179.6(5) . . . 3_667 ?
 I1B C11 C12 F1 -0.7(7) . . . . ?
 I1B C11 C12 C13 179.6(6) . . . 3_667 ?

_shelx_res_file
;
TITL
    sm052_3-cpa_14ditfb.res
    created by SHELXL-2017/1 at 15:25:50 on 17-Feb-2022
CELL 1.54184 13.1495 8.9685 14.6148 90 102.842 90
ZERR 4 0.0001 0.0001 0.0001 0 0.001 0
LATT 1
SYMM 0.5-X,0.5+Y,0.5-Z
SFAC C H Cl F I N O S
UNIT 52 52 4 8 4 8 12 4
EQIV $1 0.5-X,0.5+Y,1.5-Z
ISOR 0.005 0.01 C12 C11 C13 C7

L.S. 99
PLAN  2
SIZE 0.18 0.18 0.51
TEMP -173
CONF
HTAB N1 O3_$1
MORE -1
BOND $H
fmap 2
acta
OMIT -1 0 1
REM <olex2.extras>
REM <HklSrc "%.\\SM052_3-CPA_14DITFB.hkl">
REM </olex2.extras>

WGHT    0.067600    4.321200
FVAR       0.28339   0.87425
PART 1
I1A   5    0.525574    0.187714    0.864078    21.00000    0.00866    0.03816 =
         0.02319   -0.01252    0.00078   -0.00244

PART 0
CL1   3    0.781781   -0.001145    0.695759    11.00000    0.00433    0.05703 =
         0.01277   -0.00572    0.00034    0.00031

F1    4    0.524720    0.225660    1.079706    11.00000    0.02281    0.03820 =
         0.02831    0.00683    0.00755    0.00551
O3    7    0.281426   -0.122722    0.768399    11.00000    0.01444    0.01930 =
         0.00917    0.00053    0.00462    0.00008
F2    4    0.489765    0.538431    0.813920    11.00000    0.01299    0.05980 =
         0.00903    0.00223    0.00269    0.00748
C2    1    0.490279    0.128852    0.587493    11.00000    0.00742    0.02465 =
         0.00981   -0.00148    0.00259    0.00005
AFIX  43
H2    2    0.456027    0.207684    0.549302    11.00000   -1.20000
AFIX   0
N2    6    0.248052    0.095320    0.836233    11.00000    0.01267    0.01726 =
         0.00694    0.00192    0.00347    0.00013
H2A   2    0.241523    0.183491    0.827364    11.00000   -1.20000

C11   1    0.509086    0.374457    0.943783    11.00000    0.00321    0.03490 =
         0.01425   -0.00665   -0.00015    0.00178
C13   1    0.496082    0.517232    0.906296    11.00000    0.00299    0.04313 =
         0.01001   -0.00045    0.00058    0.00197
C3    1    0.599012    0.121736    0.610769    11.00000    0.00942    0.03080 =
         0.01238   -0.00187    0.00664   -0.00505
AFIX  43
H3    2    0.639546    0.195364    0.588552    11.00000   -1.20000
AFIX   0
C1    1    0.432474    0.019838    0.620566    11.00000    0.00650    0.02145 =
         0.00473   -0.00245    0.00271    0.00083
C10   1    0.156263   -0.026750    1.055001    11.00000    0.02658    0.03163 =
         0.01242    0.00314    0.01395    0.00535
AFIX 137
H10A  2    0.186466   -0.127077    1.063028    11.00000   -1.50000
H10B  2    0.086791   -0.028347    1.069061    11.00000   -1.50000
H10C  2    0.201206    0.042348    1.097812    11.00000   -1.50000
AFIX   0
C9    1    0.147422    0.024398    0.953881    11.00000    0.00938    0.02938 =
         0.01028    0.00125    0.00515    0.00020
AFIX  23
H9A   2    0.113226    0.123309    0.944904    11.00000   -1.20000
H9B   2    0.103365   -0.046796    0.910629    11.00000   -1.20000
AFIX   0
C8    1    0.254629    0.034447    0.930210    11.00000    0.01003    0.02576 =
         0.00371    0.00031    0.00185   -0.00138
AFIX  23
H8A   2    0.300537    0.098741    0.976943    11.00000   -1.20000
H8B   2    0.286218   -0.066200    0.934057    11.00000   -1.20000
AFIX   0
C5    1    0.589936   -0.103642    0.700312    11.00000    0.01005    0.02913 =
         0.01095    0.00232    0.00031    0.00659
AFIX  43
H5    2    0.624598   -0.181763    0.738907    11.00000   -1.20000
AFIX   0
C6    1    0.481395   -0.097219    0.676643    11.00000    0.00827    0.02510 =
         0.00943   -0.00080    0.00311   -0.00107
AFIX  43
H6    2    0.441057   -0.171618    0.698388    11.00000   -1.20000
AFIX   0

C12   1    0.512784    0.360360    1.039221    11.00000    0.00545    0.03040 =
         0.01874    0.00124    0.00150    0.00279
N1    6    0.257806    0.093685    0.682171    11.00000    0.00892    0.01661 =
         0.00549   -0.00129    0.00399    0.00159
H1    2    0.242668    0.184132    0.684788    11.00000   -1.20000
C4    1    0.646817    0.006199    0.666527    11.00000    0.00498    0.03486 =
         0.00821   -0.00692    0.00144    0.00159
S1    8    0.295063    0.031171    0.589297    11.00000    0.00393    0.01890 =
         0.00382    0.00005    0.00116   -0.00004
O2    7    0.267324    0.148221    0.521857    11.00000    0.00847    0.02412 =
         0.00639    0.00345    0.00101    0.00162
O1    7    0.254970   -0.116033    0.568015    11.00000    0.01079    0.01922 =
         0.00810   -0.00288    0.00139   -0.00110
C7    1    0.263363    0.013528    0.765106    11.00000    0.00165    0.02068 =
         0.00764   -0.00111    0.00064   -0.00205
PART 2
I1B   5    0.520609    0.218172    0.848115   -21.00000    0.01653    0.03353 =
         0.02644   -0.02429    0.00896   -0.00796
HKLF 4


REM
REM R1 =  0.0380 for    3286 Fo > 4sig(Fo)  and  0.0384 for all    3342 data
REM    225 parameters refined using     24 restraints

END

WGHT      0.0656      3.2497

REM Highest difference peak  1.027,  deepest hole -2.258,  1-sigma level  0.158
Q1    1   0.6215  0.1992  0.9417  11.00000  0.05    1.03
Q2    1   0.4360  0.1818  0.7774  11.00000  0.05    0.92
;
_shelx_res_checksum                5094
_shelx_hkl_file
;
   0   0  -1    1.98    0.84
   0   0  -2   19.36    2.69
   0   0  -3    0.81    1.16
   0   0   3    1.59    0.87
   0   0  -4 3153.88  110.21
   0   0   4 3071.49  108.64
   0   0  -5    2.12    1.80
   0   0   5    1.64    1.35
   0   0  -6   12.04    3.03
   0   0   6   15.96    3.32
   0   0  -7    2.18    1.60
   0   0   7    0.73    1.35
   0   0  -7    0.54    0.64
   0   0   7    1.02    0.75
   0   0  -7    3.63    1.12
   0   0  -7    0.22    0.73
   0   0  -7    0.69    1.28
   0   0  -8  171.26    8.86
   0   0   8  185.57   14.20
   0   0  -8  165.77    8.83
   0   0   8  178.35    9.52
   0   0  -8  177.89    8.86
   0   0  -8  167.70   13.48
   0   0  -9    1.97    1.61
   0   0  -9    0.52    1.64
   0   0   9    2.14    1.97
   0   0   9    2.58    1.29
   0   0  -9    1.90    1.04
   0   0  -9    2.57    1.21
   0   0  -9    2.41    1.22
   0   0  -9    1.85    2.04
   0   0 -10   45.50    4.30
   0   0  10   37.96    7.48
   0   0 -10   46.70    4.34
   0   0  10   48.43    4.96
   0   0 -10   48.37    4.40
   0   0 -10   55.22    4.47
   0   0 -10   54.87    8.08
   0   0 -10   42.79    5.47
   0   0 -10   43.53    7.85
   0   0 -11    8.16    2.80
   0   0 -11    0.71    1.98
   0   0 -11    0.19    1.05
   0   0  11    5.10    3.52
   0   0  11    8.38    2.33
   0   0 -11    0.48    0.95
   0   0 -11    0.56    1.07
   0   0 -11    3.03    2.53
   0   0  12   22.57    3.82
   0   0  12   20.73    6.32
   0   0 -12   16.79    2.63
   0   0 -12   23.22    3.36
   0   0  12   22.49    3.36
   0   0 -12   21.83    6.21
   0   0 -12   23.85    6.37
   0   0 -12   20.67    4.31
   0   0 -13    2.27    2.58
   0   0 -13   -0.39    1.88
   0   0  13    1.64    3.02
   0   0  13    2.75    2.10
   0   0  13    3.94    1.82
   0   0 -13    0.67    2.29
   0   0  14  108.11   13.84
   0   0  14  107.85    8.36
   0   0 -14  115.05    7.71
   0   0 -14  121.31   10.39
   0   0  14  101.23    6.98
   0   0  15   -0.22    1.24
   0   0 -15    0.64    1.60
   0   0 -15    0.33    0.92
   0   0  16   49.08    4.56
   0   0 -16   57.81    5.70
   0   0  17    1.18    0.85
   0   0 -17    0.96    1.21
   0   1   0    2.33    0.47
   0  -1   0    0.67    0.26
   0   1   1  658.57   23.09
   0  -1   1  661.43   23.08
   0   1  -1  646.66   23.52
   0  -1   2 1361.57   45.92
   0   1   2 1309.24   45.87
   0   1  -2 1223.80   46.29
   0  -1  -3  431.44   22.63
   0   1  -3  476.21   20.52
   0  -1   3  541.74   20.04
   0   1   3  558.23   20.12
   0   1  -3  441.74   17.66
   0   1  -4  559.91   26.25
   0  -1  -4  521.71   30.51
   0  -1   4  673.23   26.06
   0   1   4  687.06   26.10
   0  -1  -5  241.95   17.78
   0   1  -5  195.75   12.40
   0   1   5  220.32   12.43
   0  -1   5  217.81   12.46
   0   1  -6 1035.69   44.15
   0  -1   6 1044.12   44.37
   0   1   6 1125.25   44.79
   0  -1   7  638.91   30.63
   0   1   7  708.58   31.30
   0  -1  -7  632.48   25.31
   0   1  -7  631.76   24.15
   0  -1  -7  560.50   24.62
   0   1  -7  614.19   24.20
   0   1   7  690.69   25.30
   0  -1   7  625.98   24.70
   0  -1   7  723.62   25.48
   0  -1  -7  590.98   24.56
   0  -1  -7  703.04   26.19
   0   1  -7  647.81   24.38
   0   1  -7  629.35   31.44
   0  -1  -7  650.61   29.28
   0   1  -7  767.69   30.90
   0  -1  -7  853.27   37.27
   0  -1  -8  739.84   29.93
   0   1  -8  738.87   28.96
   0   1  -8  736.80   28.81
   0  -1  -8  723.36   29.66
   0   1   8  820.37   37.21
   0  -1   8  728.47   36.18
   0   1   8  798.97   30.15
   0  -1   8  800.40   30.18
   0  -1   8  768.33   29.69
   0   1  -8  805.61   29.14
   0  -1  -8  840.66   30.78
   0  -1  -8  750.84   29.46
   0   1  -8  936.43   36.64
   0  -1  -8  957.90   41.92
   0  -1  -8  761.67   35.02
   0   1  -8  724.20   37.35
   0   1  -9    4.22    1.83
   0  -1  -9    1.96    1.53
   0  -1  -9    0.91    1.42
   0   1  -9    1.90    1.32
   0   1  -9    2.38    2.19
   0  -1  -9    0.41    0.91
   0  -1   9    4.83    2.99
   0  -1  -9    0.34    1.04
   0   1   9    8.48    3.30
   0   1  -9    3.79    1.19
   0  -1   9    6.47    1.87
   0   1   9    7.49    1.90
   0   1  -9    3.47    1.22
   0  -1  -9    1.56    0.97
   0  -1  -9    0.55    0.98
   0   1  -9    5.79    1.49
   0   1  -9   -0.42    1.30
   0  -1  -9    0.60    1.86
   0  -1 -10  197.43   12.96
   0   1 -10  197.83   13.06
   0   1 -10  192.34   18.11
   0  -1 -10  203.26   12.22
   0  -1 -10  216.76   16.90
   0   1  10  202.67   11.68
   0  -1  10  202.85   11.71
   0  -1  10  207.22   17.65
   0   1  10  207.94   17.61
   0   1 -10  215.20   10.78
   0   1 -10  200.05   10.50
   0   1 -10  213.09   10.72
   0  -1 -10  221.89   11.27
   0  -1 -10  232.12   12.01
   0  -1 -10  261.41   19.72
   0   1 -10  257.70   17.25
   0   1 -11 1664.25   63.79
   0  -1 -11 1490.28   69.10
   0  -1 -11 1613.55   63.55
   0  -1 -11 1562.47   61.31
   0   1 -11 1517.42   73.31
   0  -1  11 1508.61   60.48
   0   1  11 1535.48   60.65
   0   1 -11 1625.53   59.04
   0   1  11 1690.71   73.09
   0  -1  11 1614.44   72.56
   0   1 -11 1559.52   58.73
   0   1  11 1650.91   59.34
   0  -1 -11 1591.08   59.06
   0   1 -11 1728.06   59.20
   0   1 -11 1621.53   58.25
   0  -1 -11 1732.23   60.72
   0  -1 -11 1874.15   74.03
   0   1 -11 2036.00   71.67
   0  -1 -12  627.58   36.69
   0   1 -12  701.14   32.40
   0   1 -12  650.34   40.57
   0  -1 -12  673.71   32.17
   0   1  12  652.10   29.34
   0   1  12  643.90   38.95
   0   1 -12  690.14   27.84
   0  -1  12  632.32   38.93
   0   1  12  676.22   27.61
   0   1 -12  686.27   27.74
   0  -1 -12  737.07   29.30
   0  -1 -13  218.51   15.24
   0   1 -13  253.73   16.07
   0   1 -13  204.44   20.49
   0   1  13  221.58   13.24
   0   1 -13  218.07   11.71
   0   1  13  214.74   20.28
   0  -1  13  226.62   20.71
   0   1 -13  229.49   11.96
   0  -1 -13  237.56   12.85
   0   1 -13  257.76   19.41
   0  -1  13  207.40   12.14
   0   1  14  224.63   13.11
   0  -1  14  212.65   12.83
   0   1  14  203.94   19.48
   0  -1  14  223.47   20.15
   0  -1  14  221.08   11.93
   0   1 -14  251.33   19.02
   0  -1 -14  237.75   12.47
   0   1 -14  229.74   11.81
   0   1 -14  238.64   15.30
   0  -1  15   13.46    2.27
   0   1 -15   12.54    2.19
   0   1  15    8.31    2.23
   0  -1  15   13.71    2.73
   0   1 -15    9.53    2.86
   0   1 -16  138.90    7.52
   0   1  16  144.21    8.44
   0  -1  16  148.17    8.53
   0   1 -16  159.37    9.93
   0  -1  17   66.87    4.63
   0   1  17   77.23    4.89
   0  -1 -17   84.30    5.73
   0   1 -17   74.49    5.36
   0  -2   0 1227.68   46.35
   0  -2   0 1194.19   44.44
   0  -2   1  820.22   29.79
   0   2   1  785.42   29.73
   0   2  -2   79.94    5.57
   0   2  -2   70.24    4.56
   0  -2  -2   61.86    5.73
   0  -2   2   69.40    4.22
   0   2   2   65.20    4.18
   0   2   3 1410.25   51.74
   0  -2   3 1450.37   51.71
   0   2  -3 1454.65   52.86
   0   2  -4  371.78   15.54
   0  -2   4  439.48   18.42
   0   2   4  436.44   18.52
   0   2  -4  383.62   19.02
   0  -2   5 1109.59   43.40
   0   2   5 1147.60   43.60
   0   2  -5 1109.12   44.63
   0   2  -5 1088.01   39.28
   0   2  -5 1058.17   45.25
   0  -2  -6  281.88   13.59
   0   2  -6  251.18   16.64
   0  -2   6  293.30   12.02
   0  -2   6  301.48   16.32
   0   2   6  323.31   16.69
   0   2  -6  241.90   11.13
   0  -2   6  264.31   11.28
   0  -2  -6  246.76   14.67
   0  -2   6  242.54   11.16
   0   2  -6  261.40   16.03
   0   2  -7    7.15    3.04
   0  -2  -7    2.69    1.37
   0  -2   7    2.80    1.12
   0  -2   7    2.87    1.11
   0   2   7    1.99    1.02
   0  -2   7    4.21    2.20
   0   2  -7    8.31    1.38
   0   2  -7    3.80    1.13
   0   2   7    2.66    1.99
   0  -2   7    3.80    1.22
   0   2  -7    1.64    0.80
   0  -2  -7    3.49    1.25
   0   2  -7    7.31    1.28
   0   2  -7    2.57    1.01
   0  -2  -7    6.14    2.40
   0   2  -7    9.29    3.02
   0  -2  -8 1278.57   53.20
   0   2   8 1435.59   58.07
   0  -2   8 1437.93   58.29
   0   2  -8 1327.08   48.29
   0   2  -8 1363.47   48.66
   0  -2   8 1417.38   50.04
   0  -2   8 1408.44   49.93
   0   2   8 1400.27   49.92
   0   2  -8 1358.26   48.82
   0  -2  -8 1231.09   49.37
   0   2  -8 1498.49   56.87
   0  -2  -8 1228.80   48.24
   0  -2  -9  445.05   24.47
   0  -2  -9  429.61   21.84
   0  -2  -9  503.21   21.61
   0   2  -9  490.98   22.58
   0  -2   9  516.66   28.68
   0   2  -9  483.70   19.50
   0   2   9  510.87   28.47
   0   2  -9  469.69   19.57
   0  -2   9  513.78   21.21
   0   2   9  487.05   20.99
   0  -2  -9  458.10   20.43
   0   2  -9  503.27   19.86
   0  -2  -9  559.54   23.23
   0   2  -9  537.94   26.89
   0  -2  -9  439.93   19.21
   0  -2 -10  835.68   34.25
   0   2 -10  798.77   45.12
   0  -2 -10  825.77   35.74
   0   2 -10  806.21   35.56
   0  -2 -10  736.01   38.00
   0   2 -10  817.50   31.70
   0  -2  10  822.98   42.91
   0   2 -10  833.74   31.89
   0   2  10  844.30   43.24
   0   2  10  834.58   33.66
   0  -2  10  803.47   33.43
   0   2 -10  864.61   32.02
   0  -2 -10  941.54   35.14
   0   2 -10  932.13   40.50
   0  -2 -11   55.40    6.74
   0   2 -11   54.23   10.21
   0  -2 -11   61.82    6.09
   0   2 -11   55.24    6.72
   0  -2  11   55.58    9.26
   0   2 -11   52.89    4.60
   0   2 -11   54.52    4.69
   0   2  11   56.60    9.43
   0   2  11   59.05    5.76
   0  -2  11   54.19    5.52
   0   2 -11   61.86    4.84
   0  -2 -11   53.72    5.59
   0   2 -11   62.56    8.44
   0  -2 -12  136.19   11.11
   0   2 -12  139.72   11.19
   0   2 -12  111.32   15.31
   0   2  12  128.29   14.89
   0   2 -12  127.56    7.82
   0   2 -12  128.35    7.86
   0  -2  12  113.57   13.83
   0   2  12  123.39    9.00
   0  -2  12  114.59    8.66
   0   2 -12  127.89    7.80
   0  -2 -12  130.20    9.01
   0   2 -12  129.59   12.74
   0  -2  13   16.62    3.12
   0   2  13    6.27    2.25
   0   2  13   15.79    5.25
   0  -2  13   10.10    4.28
   0   2 -13   14.32    2.50
   0   2 -13   15.15    2.52
   0   2 -13   13.87    3.75
   0  -2 -13   13.70    3.73
   0   2 -13   14.45    5.91
   0   2 -13   13.92    4.41
   0   2  14  317.67   15.88
   0  -2  14  279.91   15.14
   0   2  14  332.05   24.11
   0  -2  14  254.87   21.41
   0   2 -14  310.95   14.38
   0  -2  14  306.30   15.31
   0   2 -14  327.93   21.58
   0   2 -14  329.29   18.29
   0  -2 -14  337.34   18.54
   0  -2  15   12.47    2.26
   0   2 -15   14.98    3.25
   0  -2 -15   19.07    3.69
   0   2 -15   12.01    2.12
   0   2  15   15.08    2.67
   0  -2  15   13.66    2.47
   0  -2 -16    3.97    1.30
   0  -2  16    1.76    0.98
   0   2 -16    1.09    0.87
   0   2 -16    3.24    1.54
   0  -2 -16    2.70    1.50
   0   2  16    2.00    1.09
   0  -2  16    0.41    0.99
   0   3   0    1.89    0.80
   0  -3   0    1.11    1.24
   0  -3   1  423.38   16.84
   0   3  -1  447.59   18.13
   0   3  -2  346.75   15.17
   0   3   2  250.71   11.61
   0  -3   2  271.46   11.87
   0   3  -2  314.69   14.19
   0  -3  -2  321.30   16.88
   0   3   3 3153.12  117.22
   0  -3   3 3319.81  117.37
   0   3  -3 3446.27  117.47
   0  -3  -3 3443.77  123.06
   0  -3   4  222.39   12.40
   0   3   4  251.17   13.00
   0   3  -4  236.50   14.72
   0   3  -4  234.81   13.68
   0  -3  -4  258.93   16.33
   0   3  -5  171.97   12.60
   0  -3   5  161.65    7.91
   0  -3   5  177.82   10.92
   0   3   5  158.51   10.62
   0  -3   5  142.26    7.12
   0   3  -5  142.49    7.61
   0   3  -5  158.50   11.28
   0  -3  -5  141.43    7.55
   0   3   6  475.11   22.04
   0  -3   6  450.54   21.50
   0  -3   6  387.73   15.44
   0   3  -6  350.04   14.94
   0   3  -6  363.94   14.88
   0   3  -6  346.18   14.88
   0   3  -6  408.14   23.20
   0  -3  -6  386.72   15.89
   0   3  -6  433.18   22.05
   0  -3   6  404.06   15.81
   0   3   7  598.97   22.42
   0  -3   7  596.38   22.28
   0  -3   7  600.02   28.63
   0   3  -7  519.36   21.17
   0   3   7  581.23   28.62
   0   3  -7  563.60   20.92
   0  -3   7  543.47   21.42
   0   3  -7  503.75   20.53
   0   3  -7  521.41   20.54
   0   3  -7  520.06   20.76
   0   3  -7  532.32   30.52
   0  -3   7  549.39   21.74
   0   3  -7  581.71   28.54
   0  -3  -7  524.74   21.59
   0  -3   8   15.43    2.54
   0  -3   8   15.72    2.64
   0   3   8   19.81    2.84
   0  -3   8   14.41    4.34
   0   3  -8   13.79    1.97
   0   3  -8   11.83    1.98
   0   3   8   21.85    4.92
   0  -3   8   16.89    2.45
   0   3  -8   11.17    1.70
   0   3  -8   12.72    1.85
   0   3  -8   12.36    2.10
   0   3  -8   15.20    4.15
   0  -3  -8   12.86    2.17
   0   3  -8   21.32    5.56
   0   3   9  133.29   13.54
   0   3  -9  134.20    7.38
   0   3  -9  132.44    7.56
   0  -3   9  143.59   13.84
   0   3  -9  117.12    9.12
   0  -3  -9  156.63    9.28
   0   3  -9  123.58   14.66
   0  -3  -9  126.92    9.48
   0   3  -9  133.19    7.75
   0  -3   9  136.27    8.66
   0   3   9  154.44    9.16
   0  -3  -9  130.32    7.85
   0   3  -9  137.93   12.29
   0  -3  10  119.58   13.48
   0   3 -10  115.65    7.35
   0   3 -10  132.04    7.56
   0   3  10  145.20   14.99
   0   3 -10  130.37   10.02
   0  -3 -10  135.25    9.14
   0  -3 -10  147.98   10.63
   0   3 -10  121.20    7.50
   0  -3  10  130.54    8.79
   0   3  10  149.73    9.40
   0   3 -10  148.96   12.75
   0  -3 -10  133.35    7.88
   0  -3  11   41.50    8.07
   0   3  11   27.36    6.88
   0   3 -11   28.89    3.34
   0   3 -11   34.62    5.28
   0  -3 -11   32.01    4.26
   0  -3 -11   32.28    5.20
   0   3 -11   34.88    3.58
   0  -3  11   29.22    4.07
   0   3  11   32.87    4.29
   0   3 -11   31.23    5.99
   0   3 -12   14.00    2.31
   0  -3  12    9.10    4.03
   0   3  12    7.39    3.86
   0   3  12    7.17    2.27
   0  -3  12    7.26    2.18
   0   3 -12    9.58    3.06
   0  -3 -12    5.51    2.57
   0   3 -12    6.86    4.32
   0   3 -12    7.97    1.93
   0   3 -12    9.24    3.58
   0   3 -13    1.09    2.15
   0  -3 -13    1.12    2.70
   0  -3 -13    1.07    1.80
   0   3 -13    0.92    2.57
   0   3 -13    2.44    2.22
   0  -3  13    0.44    1.14
   0   3  13    1.87    1.46
   0   3  13    1.42    2.42
   0   3 -13    4.13    1.51
   0  -3  13    1.33    2.06
   0   3 -13    1.23    1.17
   0   3 -13    1.02    1.75
   0   3 -14   42.29    3.90
   0   3 -14   39.52    3.74
   0  -3  14   42.21    4.61
   0   3  14   35.66    4.20
   0  -3  14   37.33    4.13
   0  -3 -14   49.42    5.99
   0   3 -14   41.76    5.48
   0  -3 -15  224.28   11.27
   0  -3  15  201.14   10.55
   0  -3  15  180.34   10.02
   0   3  15  197.26   10.49
   0   3 -15  214.03    9.98
   0  -3 -15  203.47   12.02
   0   3 -15  208.60   12.02
   0  -3  16   18.53    2.26
   0  -3 -16   20.77    2.53
   0   3 -16   21.92    2.27
   0   3  16   26.44    2.66
   0  -3 -17  132.01    6.62
   0  -4   0   70.90    7.52
   0   4   0   83.30    5.41
   0  -4  -1  206.95    9.15
   0  -4   1  190.48    9.95
   0   4  -1  226.62   11.53
   0   4  -1  181.19   12.41
   0  -4  -1  187.22   13.37
   0  -4   1  177.95   12.21
   0  -4  -2   57.98    4.04
   0  -4  -2   52.05    3.88
   0  -4  -2   47.56    3.88
   0  -4   2   48.95    4.58
   0   4  -2   62.29    6.11
   0   4  -2   49.54    5.40
   0  -4  -2   54.01    6.92
   0  -4   3   58.40    3.89
   0  -4   3   56.84    3.70
   0   4  -3   55.48    5.30
   0  -4  -3   50.31    4.09
   0  -4  -3   42.36    4.00
   0  -4  -3   45.77    3.80
   0  -4  -3   50.79    7.03
   0  -4   3   55.29    5.40
   0   4  -3   65.73    6.95
   0   4  -4  162.50   12.35
   0   4   4  120.30    8.39
   0  -4   4  125.76    8.80
   0  -4   4  137.99    7.40
   0  -4   4  146.64    7.32
   0  -4  -4  179.49   14.15
   0  -4  -4  145.23    7.81
   0  -4   4  151.14    7.38
   0   4  -4  145.46   10.85
   0  -4   5  917.84   33.87
   0   4   5  823.71   36.74
   0   4  -5  936.34   32.74
   0  -4   5  854.71   37.10
   0  -4   5  891.90   33.24
   0   4  -5  944.47   42.16
   0  -4  -5  859.18   33.78
   0  -4   5  935.44   33.49
   0   4  -5  910.53   40.05
   0  -4   6    7.78    1.81
   0  -4   6    6.28    2.34
   0   4   6    6.31    2.55
   0   4  -6    6.92    1.37
   0  -4   6    5.69    1.34
   0   4  -6    6.93    1.32
   0   4  -6    7.87    1.44
   0   4  -6    7.45    1.45
   0   4  -6    6.02    3.06
   0  -4  -6    6.59    1.57
   0   4  -6    6.52    2.71
   0  -4   7   25.96    3.00
   0  -4   7   22.15    3.05
   0   4  -7   23.32    2.51
   0   4   7   17.32    4.19
   0   4  -7   18.32    2.50
   0  -4   7   20.91    4.50
   0  -4   7   20.76    2.61
   0   4  -7   21.51    2.41
   0   4  -7   24.39    2.49
   0   4  -7   22.07    2.48
   0   4  -7   22.24    5.78
   0  -4  -7   20.50    2.84
   0   4  -7   25.08    5.25
   0  -4   8   65.58    5.35
   0   4   8   66.64    5.40
   0  -4   8   71.48    5.90
   0   4   8   63.24    8.57
   0   4  -8   69.07    4.71
   0   4  -8   65.68    4.98
   0  -4   8   75.95    9.34
   0  -4   8   72.04    5.37
   0   4  -8   58.38    4.33
   0   4  -8   63.12    4.59
   0   4  -8   65.63   10.49
   0  -4  -8   59.60    5.24
   0   4  -8   70.81    8.90
   0   4   9 1348.72   56.53
   0   4  -9 1129.32   44.22
   0  -4   9 1320.85   56.36
   0  -4   9 1267.28   45.91
   0   4   9 1304.38   46.10
   0   4  -9 1118.11   44.44
   0   4  -9 1195.15   43.80
   0   4  -9 1219.31   60.33
   0  -4  -9 1304.04   46.01
   0  -4  -9 1105.15   46.72
   0  -4  -9 1199.83   45.41
   0   4  -9 1186.15   53.45
   0   4  10   49.03    8.57
   0  -4  10   46.96    8.33
   0   4 -10   37.27    3.75
   0   4  10   38.58    4.50
   0  -4  10   40.06    4.60
   0   4 -10   37.76    3.89
   0  -4 -10   45.03    4.45
   0   4 -10   45.33    7.30
   0  -4 -10   38.75    4.45
   0  -4 -10   39.55    5.37
   0   4 -10   29.90    7.92
   0   4 -11   17.96    6.25
   0  -4 -11   22.50    3.51
   0  -4 -11   24.32    4.34
   0   4 -11   20.81    3.83
   0  -4  11   22.44    3.53
   0   4  11   24.37    3.64
   0   4 -11   21.18    2.93
   0  -4  11   28.52    6.66
   0   4  11   21.43    5.72
   0   4 -11   20.81    2.92
   0  -4 -11   17.49    6.45
   0   4 -11   27.56    5.77
   0  -4 -11   20.76    2.92
   0   4 -12   25.16    4.22
   0  -4 -12   34.43    5.31
   0   4 -12   20.78    7.10
   0   4  12   23.87    3.57
   0  -4  12   37.25    4.36
   0   4 -12   31.76    3.47
   0  -4 -12   41.80    5.17
   0   4 -12   32.95    3.39
   0  -4 -12   27.14    8.15
   0   4 -12   34.90    6.33
   0  -4  13  504.63   21.88
   0   4  13  502.45   21.75
   0   4 -13  520.74   20.93
   0  -4 -13  554.71   23.96
   0   4 -13  499.29   20.69
   0   4 -13  467.02   23.01
   0  -4  13  502.69   22.58
   0   4 -14   10.10    1.84
   0   4 -14   10.93    1.84
   0   4 -14    9.50    2.40
   0  -4  14    7.26    1.99
   0  -4 -14   14.09    2.82
   0   4  14   13.89    2.31
   0   4 -15   20.38    2.30
   0  -4  15   24.60    2.96
   0  -4  15   18.36    2.55
   0  -4 -15   21.19    2.88
   0  -4 -15   22.10    3.06
   0  -4 -16   16.21    2.40
   0  -4 -16   13.57    1.91
   0  -4 -16   14.36    1.86
   0  -4  16   13.32    1.76
   0  -5   0    0.11    0.53
   0   5   0    0.46    1.68
   0  -5   0   -0.23    0.60
   0  -5   0    0.12    0.64
   0  -5   0    0.43    1.21
   0   5  -1  660.17   25.76
   0  -5   1  539.21   21.76
   0  -5   1  573.62   22.04
   0  -5  -1  589.29   22.68
   0  -5  -1  547.25   21.98
   0  -5  -1  577.92   22.63
   0   5  -1  565.89   28.68
   0  -5  -1  542.03   29.36
   0  -5   1  616.67   22.64
   0  -5   1  539.06   28.43
   0  -5  -2  313.10   14.49
   0  -5  -2  306.35   13.63
   0  -5  -2  332.71   14.40
   0  -5   2  316.33   13.52
   0  -5   2  331.59   13.50
   0  -5  -2  320.69   14.30
   0   5  -2  321.81   18.18
   0  -5  -2  329.57   20.92
   0  -5   2  275.91   18.19
   0  -5   2  305.06   15.42
   0   5  -2  355.35   18.30
   0   5  -3  195.43   13.55
   0  -5   3  154.43   10.29
   0  -5   3  154.96    8.03
   0  -5  -3  172.18    9.28
   0  -5  -3  152.55    9.24
   0  -5   3  148.50    7.99
   0  -5   3  138.15   11.60
   0  -5  -3  195.65   15.40
   0   5  -3  177.79   11.32
   0  -5  -3  163.75    8.89
   0  -5   3  154.14    7.93
   0  -5   4   -0.31    1.06
   0   5  -4    0.96    1.49
   0  -5   4    2.09    0.95
   0  -5  -4    2.69    1.56
   0  -5  -4    2.94    2.31
   0  -5  -4    2.01    1.22
   0   5  -4    3.24    2.03
   0  -5   4    2.25    0.91
   0  -5   5  187.26    9.99
   0   5  -5  211.99    9.28
   0  -5   5  186.23    9.57
   0  -5  -5  156.29   11.05
   0   5  -5  188.72   15.85
   0  -5   5  146.32   12.46
   0   5  -5  211.86   15.55
   0  -5  -5  167.79    9.94
   0  -5   5  198.49    9.72
   0  -5   6  272.57   13.34
   0   5  -6  292.77   12.12
   0   5  -6  263.65   12.01
   0   5  -6  264.46   11.87
   0  -5  -6  226.76   15.61
   0  -5   6  251.77   12.44
   0   5  -6  235.19   19.43
   0  -5   6  252.64   12.53
   0  -5  -6  237.41   12.91
   0   5  -6  296.62   19.71
   0  -5   7  435.16   18.70
   0  -5   7  410.92   17.42
   0   5  -7  374.27   16.44
   0   5  -7  382.52   16.25
   0   5  -7  363.65   16.25
   0   5  -7  441.74   25.95
   0  -5  -7  376.30   17.87
   0   5  -7  358.31   26.25
   0   5  -8   98.74    6.70
   0  -5   8  102.53    7.08
   0  -5  -8   99.41   10.04
   0   5  -8   91.90    6.10
   0   5  -8   92.57    5.94
   0   5  -8  106.17   11.88
   0  -5  -8   97.08    7.23
   0   5  -8   84.64   12.24
   0   5  -9   41.75    4.11
   0  -5   9   54.41    5.20
   0  -5  -9   54.69    7.21
   0   5  -9   40.47    3.76
   0   5  -9   40.11    3.60
   0   5  -9   38.91    4.11
   0  -5  -9   46.93    4.81
   0   5  -9   34.76    6.86
   0   5  -9   40.69    9.08
   0   5 -10   19.64    5.14
   0  -5 -10   13.11    2.57
   0   5 -10   13.20    2.38
   0  -5 -10   16.32    3.89
   0   5 -10   11.64    2.36
   0   5 -10    6.61    4.57
   0   5 -11  593.80   24.45
   0   5 -11  587.10   24.54
   0  -5 -11  616.13   25.03
   0   5 -11  613.32   32.58
   0   5 -11  528.20   37.80
   0   5 -12    9.64    1.92
   0  -5 -12    8.75    2.60
   0   5 -12   10.59    1.96
   0  -5 -12   13.78    3.63
   0   5 -13   40.22    3.50
   0  -5 -13   42.61    4.83
   0  -5 -13   44.37    5.19
   0   5 -13   36.67    3.41
   0   5 -14   27.20    2.60
   0  -5 -14   25.94    3.54
   0  -5 -14   29.87    3.58
   0   5 -14   25.25    2.44
   0  -5  14   29.33    3.70
   0  -5  15  166.16    8.72
   0  -5 -15  209.22    9.73
   0  -5 -15  213.00    9.68
   0   5  15  178.88    8.84
   0   5 -15  189.93    8.27
   0  -5  15  210.10    9.66
   0  -5 -16   30.52    2.63
   0  -6   0  693.98   26.43
   0  -6   0  629.90   25.56
   0   6   0  652.73   35.38
   0  -6   0  609.97   33.30
   0  -6   0  720.41   26.82
   0  -6   1  780.18   29.55
   0  -6  -1  796.95   30.41
   0  -6  -1  761.17   29.22
   0  -6   1  706.99   28.75
   0  -6   1  762.29   29.20
   0   6   1  793.68   40.55
   0   6  -1  820.53   38.73
   0  -6  -1  818.98   30.45
   0  -6   1  860.77   32.31
   0  -6  -1  756.34   38.44
   0  -6   1  676.57   36.00
   0  -6  -1  782.26   29.65
   0   6  -2    3.83    2.30
   0  -6   2    4.54    1.31
   0  -6  -2    3.96    1.51
   0  -6   2    4.10    1.27
   0  -6   2    2.86    1.11
   0  -6  -2    3.44    1.16
   0  -6  -2    2.78    1.28
   0  -6   2    3.84    1.71
   0  -6   2    4.87    2.39
   0  -6  -2    4.65    2.80
   0  -6  -2    2.98    1.22
   0  -6   2    4.38    1.27
   0  -6   3  165.45    8.83
   0  -6  -3  165.78    9.87
   0   6  -3  185.94   14.30
   0   6  -3  193.44   13.12
   0   6  -3  183.05   13.74
   0  -6   3  152.49   12.75
   0  -6  -3  182.79   10.02
   0  -6  -3  168.06    9.12
   0  -6  -3  187.57   16.57
   0  -6   3  171.47   11.38
   0  -6  -3  169.37   10.04
   0  -6   3  164.72    8.94
   0  -6  -3  164.39    9.40
   0  -6   4  125.08    7.54
   0   6  -4  154.12   13.29
   0  -6  -4  124.00    9.28
   0   6  -4  130.71   12.57
   0  -6  -4  160.98    9.37
   0  -6  -4  144.91    8.23
   0  -6   4  104.37    9.38
   0  -6  -4  116.09    9.23
   0  -6  -4  135.66    9.23
   0  -6  -4  125.21    8.32
   0  -6   5  103.60    6.73
   0   6  -5  137.45   12.90
   0  -6  -5   93.61    7.15
   0  -6  -5  103.05    8.67
   0  -6  -5   90.59    8.79
   0  -6  -5   93.07    7.54
   0   6  -5   90.26   11.18
   0  -6  -5   92.80    8.55
   0  -6  -5  133.95    7.88
   0  -6   5   76.68    8.27
   0  -6   6    4.49    1.46
   0  -6  -6    1.10    1.19
   0   6  -6    4.24    2.67
   0   6  -6    2.94    1.21
   0   6  -6    2.32    1.11
   0  -6   6    1.02    1.01
   0  -6  -6    7.73    3.11
   0   6  -6    1.99    2.44
   0  -6  -6    0.79    1.65
   0  -6   6    1.96    1.97
   0   6  -7   14.71    4.73
   0  -6  -7   13.38    2.70
   0  -6   7   11.98    2.36
   0   6  -7   13.58    2.21
   0   6  -7   14.76    2.24
   0   6  -7   13.55    2.28
   0   6  -7   18.97    5.76
   0  -6   7   13.43    3.86
   0  -6  -7    7.27    3.26
   0   6  -8  194.45   17.12
   0  -6  -8  170.82   10.78
   0   6  -8  186.28   10.11
   0  -6   8  198.98   10.75
   0  -6  -8  130.45   14.39
   0   6  -8  170.50    9.17
   0   6  -8  172.31    9.10
   0   6  -8  141.98   16.39
   0  -6   8  179.92   13.92
   0  -6  -9   62.80    5.83
   0   6  -9   51.01    8.55
   0   6  -9   56.23    4.87
   0  -6  -9   50.73    8.88
   0   6  -9   60.26    4.48
   0   6  -9   58.04    5.13
   0  -6   9   54.01    7.37
   0   6  -9   38.73    8.56
   0   6 -10    0.84    1.64
   0   6 -10    1.11    1.89
   0  -6 -10    0.84    1.14
   0   6  10    2.18    2.48
   0   6 -10    0.92    1.03
   0  -6 -10    1.18    1.90
   0   6 -10    2.03    1.33
   0  -6 -10   -0.56    1.90
   0  -6  10    0.83    1.83
   0   6 -11   95.51    6.30
   0  -6 -11  107.39   10.32
   0  -6 -11  108.76    9.12
   0  -6 -11  107.20    6.92
   0   6 -11   96.48    6.16
   0   6 -12  175.23    8.84
   0  -6 -12  221.20   12.26
   0  -6  12  184.04   10.50
   0  -6 -12  226.65   13.31
   0   6 -12  178.21    9.09
   0   6 -13  109.16    5.87
   0  -6  13   97.04    6.54
   0  -6 -13  121.41    7.73
   0  -6 -13  130.55    8.27
   0   6 -13   95.58    5.41
   0  -6 -13  143.50    9.60
   0  -6 -14   17.81    2.39
   0  -6 -14   17.03    2.42
   0  -6  14   14.38    2.00
   0  -6 -14   20.39    3.04
   0  -6  14   20.03    2.67
   0   6  14   18.05    2.27
   0   6 -14   15.89    1.67
   0  -6 -15   28.44    2.63
   0  -6  15   23.21    2.18
   0  -7   0    2.00    1.14
   0  -7   0    2.01    1.85
   0  -7   0    2.99    1.20
   0  -7   0    1.05    0.73
   0  -7   0    3.55    1.40
   0  -7   1  331.25   15.30
   0  -7  -1  297.18   14.73
   0   7   1  304.91   23.81
   0  -7  -1  375.73   16.49
   0  -7  -1  296.51   21.47
   0  -7   1  303.75   14.46
   0  -7   1  355.95   15.65
   0  -7   1  334.62   15.12
   0  -7  -1  324.02   14.95
   0  -7  -1  366.39   16.58
   0   7  -1  383.94   24.12
   0  -7   2   75.50    5.72
   0   7   2   76.37   11.27
   0  -7  -2   81.12    6.44
   0  -7  -2   67.31    9.71
   0  -7  -2   74.82    5.78
   0  -7  -2   74.07    6.37
   0   7  -2   88.87   10.01
   0  -7   2   72.59    5.41
   0  -7  -2   72.78    5.50
   0  -7   3  126.62    7.73
   0  -7  -3  113.35    7.86
   0  -7  -3  126.95    8.76
   0  -7  -3  108.28    7.12
   0  -7  -3  124.73    8.69
   0  -7   3  112.71    7.31
   0   7  -3  138.12   13.26
   0   7   3  120.69   14.42
   0  -7   3  102.89    9.18
   0  -7  -3  130.92    7.94
   0  -7  -4   10.91    2.39
   0  -7   4   16.63    2.59
   0   7   4   15.04    5.30
   0  -7  -4   11.52    2.06
   0  -7  -4   11.98    2.61
   0   7  -4    8.41    3.47
   0  -7   4   14.01    2.37
   0   7  -4   13.34    2.02
   0  -7  -4   14.32    3.07
   0  -7  -4   10.89    2.66
   0  -7  -4   14.93    2.60
   0  -7   4    7.53    2.67
   0  -7  -5    9.33    2.36
   0  -7   5   10.85    2.17
   0   7  -5   13.23    4.40
   0   7   5    8.11    4.24
   0   7  -5    9.91    1.90
   0  -7   5    7.57    3.10
   0  -7  -5    7.90    2.53
   0  -7  -5    8.99    2.76
   0  -7  -6  103.46   10.43
   0  -7  -6  151.93    9.84
   0   7  -6  182.96   16.46
   0  -7  -6  112.25    9.21
   0  -7  -6  130.92   11.34
   0   7  -6  156.62    8.06
   0   7  -6  163.05    8.43
   0   7   6  172.62   17.88
   0  -7   6   90.07   10.12
   0  -7  -7   55.08    5.53
   0   7  -7   54.51    8.88
   0   7  -7   49.50    4.50
   0  -7  -7   29.59    4.72
   0  -7  -7   40.98    7.46
   0  -7   7   50.11    4.69
   0  -7  -7   35.52    6.41
   0   7  -7   48.26    4.08
   0   7  -7   43.05    3.87
   0  -7   7   22.06    5.06
   0  -7  -7   26.54    5.33
   0  -7  -8   37.64    6.46
   0   7  -8   54.31    8.83
   0  -7  -8   68.14    6.11
   0   7  -8   61.18    4.93
   0  -7  -8   47.17    7.77
   0  -7  -8   34.34    5.25
   0  -7   8   74.41    5.86
   0   7   8   78.06   11.80
   0  -7   8   44.18    6.96
   0  -7  -9   25.79    3.65
   0   7  -9   13.99    4.30
   0  -7   9   19.87    3.39
   0   7   9   16.95    5.50
   0   7  -9   15.53    2.37
   0  -7  -9   15.56    3.35
   0   7  -9   19.91    2.87
   0  -7  -9   12.68    3.93
   0  -7  -9   11.05    4.05
   0  -7   9   15.51    4.17
   0  -7 -10  456.72   18.51
   0   7 -10  352.56   15.84
   0  -7 -10  425.31   22.87
   0  -7  10  427.47   18.77
   0   7 -10  357.77   16.37
   0  -7  10  439.90   22.65
   0  -7 -10  337.86   21.05
   0  -7  11    2.89    2.15
   0  -7 -11    2.70    1.87
   0   7 -11    2.58    0.95
   0  -7 -11    1.99    1.91
   0   7 -11    2.78    1.03
   0  -7  11    3.47    1.55
   0   7 -12  179.48    8.56
   0  -7 -12  215.34   12.24
   0  -7 -12  203.04   11.14
   0  -7  12  189.13    9.83
   0  -7  13    5.84    1.32
   0   7  13    8.91    1.56
   0  -7 -13    9.86    1.72
   0   7  13   10.01    1.53
   0  -7 -13   12.80    2.28
   0   8   0    9.30    4.15
   0  -8   0   10.21    2.21
   0  -8  -1   47.44    5.08
   0   8   1   35.70    7.75
   0   8  -1   48.09    8.03
   0  -8   1   38.61    3.76
   0  -8   1   42.51    4.96
   0  -8  -1   40.10    4.42
   0  -8  -1   37.86    4.00
   0  -8   1   36.00    4.08
   0  -8  -2    0.76    1.17
   0   8   2    1.49    2.55
   0   8  -2    4.54    2.86
   0  -8   2    0.32    0.96
   0  -8  -2    1.01    1.01
   0  -8   2    0.26    1.07
   0  -8  -2    1.49    1.13
   0  -8   2    1.78    1.20
   0   8  -3  193.98   17.26
   0  -8   3  170.94    9.55
   0  -8  -3  178.26   11.10
   0   8   3  150.17   16.50
   0  -8  -3  188.13   10.27
   0  -8  -3  169.21   10.97
   0  -8  -3  128.21    8.26
   0  -8   3  162.63    9.70
   0  -8  -4  229.09   13.77
   0  -8   4  253.73   13.03
   0   8   4  236.78   21.24
   0  -8  -4  264.28   13.31
   0  -8  -4  236.71   14.67
   0   8  -5  196.00   17.40
   0   8  -5  163.22    8.90
   0   8  -5  160.07    8.60
   0  -8   5  165.42    9.68
   0   8   5  177.59   18.04
   0  -8  -5  153.34   11.67
   0   8  -6   80.40   10.82
   0  -8  -6   80.99    6.85
   0  -8  -6   73.60    8.03
   0  -8  -6   52.53    5.57
   0   8  -6   88.30    5.65
   0   8  -6   80.82    5.30
   0   8   6   80.88   11.95
   0   8  -7   43.64    3.90
   0  -8  -7   30.74    5.49
   0   8  -7   31.30    3.10
   0  -8   7   19.17    4.85
   0  -8  -7   45.96    4.99
   0   8  -8  248.36   11.58
   0  -8  -8  214.83   15.75
   0   8  -8  253.31   12.26
   0  -8   8  206.52   16.30
   0   8   9   69.52    5.35
   0   8  -9   73.09    4.66
   0   8  -9   74.19    5.08
   0  -8  -9   72.59    7.78
   0  -8   9   79.89    8.82
   0  -8  -9   88.72    6.56
   0   8 -10   91.30    5.27
   0  -8 -10   90.62    7.55
   0   8  10   85.95    5.75
   0   8 -11   27.39    2.27
   0  -8 -11   25.13    3.15
   0   8  11   26.43    2.68
   0  -9   0    0.18    0.98
   0  -9   0    0.42    1.01
   0   9   0    1.20    1.86
   0  -9   1   19.62    2.97
   0  -9  -1   18.56    2.72
   0   9  -1   23.18    5.82
   0  -9  -1   20.44    3.16
   0  -9   1   18.58    3.11
   0  -9   1   17.15    3.34
   0  -9   2  410.36   18.29
   0   9  -2  494.06   28.68
   0  -9  -2  417.32   18.40
   0  -9   2  321.56   18.40
   0   9  -2  390.07   16.66
   0  -9  -3   30.07    3.71
   0  -9   3   21.81    3.72
   0  -9   3   31.82    3.85
   0   9  -4    5.74    1.50
   0  -9   4    5.83    2.16
   0  -9   4    6.23    1.87
   0   9  -5    7.23    1.63
   0  -9   5    4.48    2.05
   0  -9   5    6.76    1.93
   0   9  -6  226.25   10.01
   0  -9   6  284.64   12.40
   0   9  -7   -0.11    0.68
   0   9  -7    0.81    0.90
   0  -9   7    0.36    1.67
   0   9  -8    3.00    1.07
   0  -9   8    2.55    2.10
   0   9  -9    4.59    1.02
   0   9   9    6.45    1.43
   0  -9   9    6.26    2.32
   0  -9  10   47.99    4.62
   0  -9  11    1.43    0.66
   0 -10   0  125.37    7.48
   0  10   0  102.71    5.81
   0 -10  -1    1.57    1.09
   0 -10   1    1.75    1.17
   0  10   1    0.75    0.57
   0  10   2   47.93    3.63
   0 -10   2   50.65    4.92
   0  10  -3   13.17    1.87
   0 -10   3    9.98    2.54
   0 -10   3    7.07    2.06
   0 -10   4   35.09    4.59
   0 -10   4   37.34    5.01
   0 -10   5   10.13    2.78
   0  10   5   10.81    1.48
   0  10  -6   75.56    4.34
   0 -10   6   59.21    7.04
   0 -10   7    0.35    1.83
   0 -10   7    1.18    2.10
   0 -10   8    8.21    2.27
   0 -10   8    6.64    2.32
   1   0 -17  129.60    7.94
  -1   0  17  111.64    6.75
   1   0 -16    1.34    1.67
  -1   0  16    1.49    1.32
  -1   0  15  756.49   31.86
   1   0 -15  765.39   30.63
   1   0 -15  808.22   35.01
   1   0 -14   -0.39    1.64
  -1   0  14    0.27    1.34
  -1   0  14   -2.41    2.74
  -1   0  14    0.35    0.95
   1   0 -14    1.44    1.35
   1   0 -14   -2.46    4.84
  -1   0  13  428.88   21.60
  -1   0  13  455.88   31.41
   1   0 -13  418.72   29.39
   1   0 -13  458.10   24.57
   1   0 -13  439.26   19.38
   1   0 -13  481.70   20.90
  -1   0  13  441.70   20.14
  -1   0  12    2.10    1.32
   1   0 -12    2.65    1.61
  -1   0  12    2.33    2.65
   1   0 -12    0.74    2.06
   1   0 -12    1.13    1.89
   1   0 -12    3.24    1.44
   1   0 -12    3.06    1.61
   1   0 -12    2.01    2.46
   1   0 -11 1642.59   61.90
   1   0 -11 1738.95   62.14
  -1   0  11 1615.55   73.89
   1   0 -11 1572.05   72.97
   1   0 -11 1607.16   65.39
   1   0 -11 1729.32   61.69
   1   0 -11 1846.12   62.31
  -1   0  11 1551.29   62.75
  -1   0  10    0.41    0.98
  -1   0  10    0.59    1.65
   1   0 -10    2.17    1.37
   1   0 -10    0.56    1.35
   1   0 -10    0.96    0.95
   1   0 -10    3.28    1.36
   1   0 -10    0.82    1.05
   1   0 -10    1.62    2.13
  -1   0   9   14.39    4.07
   1   0  -9   20.68    2.68
   1   0  -9   23.33    2.88
   1   0  -9   20.94    4.78
   1   0  -9   17.98    2.52
  -1   0   9   14.29    2.49
  -1   0   9   19.22    2.56
   1   0  -9   12.23    3.75
  -1   0   8    0.86    0.75
  -1   0   8    4.43    1.21
   1   0  -8    1.14    0.84
  -1   0   8    1.65    1.15
   1   0  -8    0.80    1.11
   1   0  -8    0.32    0.70
   1   0  -8    1.43    0.87
   1   0  -8    0.13    0.75
   1   0  -8    1.64    1.71
   1   0  -7  613.68   22.24
   1   0  -7  519.73   26.40
   1   0  -7  543.61   21.84
   1   0  -7  526.50   21.74
  -1   0   7  633.80   28.20
   1   0  -7  702.75   29.54
   1   0  -6    1.06    1.11
   1   0  -6    2.22    1.65
   1   0  -5  451.24   20.91
   1   0  -5  502.51   23.03
   1   0  -4    0.66    0.72
  -1   0   4    1.34    0.94
   1   0  -4    3.50    2.00
   1   0  -3  216.76    9.97
  -1   0   3  191.44    9.69
   1   0  -2    0.26    0.47
   1   0  -1 1026.10   35.99
  -1   0   0    0.36    0.25
   1   0   0    0.75    0.35
   1   0   1  254.10    9.27
   1   0   1  249.66   10.66
   1   0   2    3.03    1.42
  -1   0  -2    7.28    2.11
  -1   0  -2    3.52    1.36
   1   0   3 2759.80   95.64
  -1   0  -3 2693.82   95.92
  -1   0  -4   -0.22    1.08
   1   0   4   -0.22    1.00
  -1   0  -4   -0.26    1.07
   1   0   5 1495.03   58.89
  -1   0  -5 1591.73   58.68
   1   0   6    3.75    1.96
  -1   0  -6    1.46    1.73
  -1   0  -7 1359.96   46.74
   1   0   7 1381.20   47.95
  -1   0  -7 1590.60   54.54
  -1   0  -7 1192.02   46.42
  -1   0  -7 1243.98   46.58
   1   0   7 1455.86   55.89
  -1   0  -8    0.25    0.71
   1   0   8    4.49    2.60
   1   0   8    1.88    1.21
  -1   0  -8    0.91    0.90
  -1   0  -8    1.44    0.83
  -1   0  -8    0.12    0.66
  -1   0  -8    1.59    1.75
  -1   0  -9    2.92    2.45
  -1   0  -9    2.46    1.53
  -1   0  -9    3.43    1.61
   1   0   9    4.00    1.68
  -1   0  -9    4.46    1.38
  -1   0  -9    5.13    2.76
  -1   0  -9    6.99    1.73
   1   0   9    4.71    3.07
  -1   0 -10    0.66    1.30
  -1   0 -10    0.92    1.65
  -1   0 -10    0.25    1.12
   1   0  10    1.60    1.15
  -1   0 -10    0.51    1.16
   1   0  10    2.03    2.31
  -1   0 -10    1.67    1.16
  -1   0 -10    3.25    2.61
   1   0  11  189.27   11.68
   1   0  11  178.31   17.69
   1   0  11  181.02   10.68
  -1   0 -11  191.75   10.59
  -1   0 -11  180.58   11.88
  -1   0 -11  184.41   13.07
  -1   0 -11  180.45   17.60
  -1   0 -11  234.39   18.06
   1   0  12    6.45    2.25
   1   0  12    7.20    4.17
  -1   0 -12    1.53    2.14
  -1   0 -12    5.51    2.89
   1   0  12    2.66    1.51
  -1   0 -12    0.81    1.26
  -1   0 -12    2.59    2.39
   1   0  13  133.38   15.51
  -1   0 -13  127.56   14.73
  -1   0 -13  127.83   10.64
  -1   0 -13  124.44    8.25
   1   0  13  112.77    8.85
   1   0  13  123.74    8.10
  -1   0 -14    0.34    1.58
  -1   0 -14    0.72    1.17
   1   0  14   -0.25    1.24
   1   0  14    0.96    0.94
  -1   0 -15   91.73    7.92
   1   0  15   84.02    6.66
  -1   0 -16    0.64    1.49
   1   0  16    0.16    1.01
  -1   0 -17    7.88    1.75
   1   0  17   10.65    1.66
   1   1 -17   32.96    3.64
   1  -1 -17   34.35    3.01
   1  -1 -17   39.83    3.99
  -1  -1  17   25.91    2.89
  -1   1  17   30.92    3.10
   1   1 -16   22.40    3.72
   1   1 -16   20.93    2.58
  -1  -1  16   15.61    2.65
  -1   1  16   20.33    2.92
  -1  -1  16   16.25    2.11
   1   1 -15   43.90    5.83
  -1  -1  15   42.84    4.19
   1   1 -15   51.32    4.47
  -1  -1  15   38.33    4.60
  -1   1  15   47.71    5.01
   1   1 -14    2.40    3.74
   1  -1 -14    2.42    4.13
   1   1 -14    1.54    2.21
   1   1 -14    3.89    2.87
  -1  -1  14    3.06    1.92
  -1   1  14    2.84    1.80
  -1   1  14    3.10    2.85
  -1  -1  14    3.83    3.02
  -1  -1  14    2.80    1.63
   1   1 -14    2.81    1.43
   1  -1 -14    2.19    1.70
   1   1 -14    0.61    2.09
  -1   1  13  392.87   19.61
  -1  -1  13  347.80   27.18
  -1   1  13  377.09   27.98
   1   1 -13  385.30   17.99
   1   1 -13  355.63   27.95
   1  -1 -13  385.42   22.11
   1   1 -13  400.83   22.38
   1   1 -13  413.48   18.30
   1   1 -13  389.02   17.30
   1  -1 -13  436.40   19.52
   1   1 -13  457.70   27.50
  -1   1  12   29.04    4.09
  -1  -1  12   18.62    3.44
   1   1 -12   17.78    2.83
   1   1 -12   26.54    3.37
  -1  -1  12   18.90    5.90
  -1   1  12   40.38    8.24
   1   1 -12   17.52    5.85
   1  -1 -12   12.44    4.39
   1   1 -12   25.50    4.69
   1  -1 -12   21.67    4.32
   1   1 -12   19.96    2.81
   1   1 -12   23.12    3.16
   1  -1 -12   19.77    3.13
   1  -1 -12   22.16    3.56
   1   1 -12   26.98    6.06
  -1   1  11   27.87    3.78
  -1  -1  11   21.29    3.44
   1   1 -11   17.38    2.78
  -1   1  11   21.10    6.03
   1   1 -11   22.05    2.97
  -1  -1  11   16.27    5.22
   1   1 -11   21.61    4.23
   1  -1 -11   17.76    3.87
   1  -1 -11   21.51    5.36
   1   1 -11   19.88    6.16
   1   1 -11   20.93    2.94
   1   1 -11   22.21    2.89
   1  -1 -11   21.17    3.18
   1  -1 -11   27.21    3.78
   1  -1 -11   32.19    7.22
   1   1 -11   29.48    6.12
  -1   1  10    6.05    1.79
  -1  -1  10    7.07    1.92
  -1  -1  10    5.47    1.66
   1  -1 -10    6.00    1.95
  -1  -1  10    9.96    3.56
   1   1 -10    7.57    1.75
  -1   1  10    7.02    2.95
   1  -1 -10    7.71    2.09
   1  -1 -10    9.11    3.39
   1   1 -10    3.96    2.77
   1  -1 -10    3.07    1.66
   1   1 -10    2.55    1.69
   1   1 -10    8.47    1.86
   1  -1 -10    8.06    1.97
   1  -1 -10    9.36    2.18
   1   1 -10    7.96    1.82
   1  -1 -10    6.35    1.90
   1   1 -10    8.22    3.37
   1  -1 -10    8.78    3.88
   1   1  -9 1624.70   58.97
   1   1  -9 1540.61   58.74
   1  -1  -9 1732.88   60.35
  -1   1   9 1558.08   67.56
   1  -1  -9 1571.83   59.72
  -1  -1   9 1422.23   66.71
   1   1  -9 1611.56   69.34
   1  -1  -9 1432.72   65.04
   1  -1  -9 1949.49   61.40
   1   1  -9 1700.21   59.09
   1  -1  -9 1684.12   59.84
  -1  -1   9 1586.68   59.30
  -1   1   9 1655.98   59.93
  -1  -1   9 1623.44   59.85
   1   1  -9 2008.35   68.62
   1  -1  -9 2266.08   76.72
   1  -1  -8  543.63   23.24
  -1   1   8  590.56   29.33
   1   1  -8  573.35   22.65
   1  -1  -8  602.09   23.91
  -1  -1   8  536.23   28.56
   1   1  -8  551.01   22.54
   1  -1  -8  525.16   27.07
   1   1  -8  539.51   29.66
   1  -1  -8  696.60   25.03
   1  -1  -8  575.14   23.41
   1   1  -8  622.92   22.90
   1   1  -8  546.78   21.84
  -1  -1   8  572.33   22.92
  -1  -1   8  586.55   23.33
  -1   1   8  589.41   23.32
   1  -1  -8  817.94   37.15
   1   1  -8  689.41   29.97
   1  -1  -7  106.91    6.59
   1  -1  -7  121.62    7.34
  -1  -1   7  120.67    9.89
   1   1  -7  116.45    6.35
  -1   1   7  142.12   10.57
   1   1  -7  112.19    6.22
   1   1  -7  118.18   10.40
   1  -1  -7  106.99    8.67
   1   1  -7  120.31    6.46
   1  -1  -7  113.84    6.78
   1  -1  -7  143.50    8.18
  -1  -1   7  112.62    6.37
   1   1  -7  131.30   10.43
   1  -1  -6  376.52   18.65
   1   1  -6  397.25   20.76
  -1   1   6  425.75   20.49
  -1  -1   6  411.37   20.34
   1  -1  -5 1170.43   41.27
   1  -1  -5 1095.99   51.00
   1  -1  -4 3547.06  114.76
   1   1  -4 3105.85  117.33
   1   1  -4 3226.62  114.30
  -1  -1   4 3581.20  116.15
  -1   1   4 3584.86  116.14
   1  -1  -3  647.95   21.71
   1   1  -3  507.91   23.36
  -1   1   3  615.96   22.79
  -1  -1   3  605.81   22.85
   1   1  -3  493.00   21.56
  -1   1   2  179.74    7.93
  -1  -1   2  168.27    7.79
   1  -1  -2  165.48    6.83
   1   1  -1 1758.52   54.52
   1  -1  -1 1700.33   54.42
   1   1  -1 1754.66   54.95
   1  -1   0  383.01   13.90
   1   1   0  417.73   14.47
   1  -1   0  422.00   14.52
   1  -1   1  394.21   15.81
   1   1   1  403.80   15.85
  -1   1  -2  111.93    6.60
  -1  -1  -2  126.55    7.29
  -1   1  -2  133.55    7.42
   1  -1   2  122.23    7.01
   1   1   2  133.22    7.29
  -1  -1  -3  707.44   35.49
  -1   1  -3  805.48   34.17
  -1  -1  -3  924.41   36.28
  -1   1  -3 1016.29   35.66
  -1  -1  -3  998.84   35.61
   1  -1   3  896.55   34.54
   1   1   3  938.06   34.77
  -1  -1  -4   29.56    4.44
   1   1   4   42.03    4.55
   1  -1   4   36.84    4.20
  -1   1  -4   26.74    3.68
  -1  -1  -4   35.70    5.53
   1  -1   5 2102.55   80.55
   1   1   5 2193.78   81.02
  -1   1  -5 2134.83   79.71
   1   1   6  195.00   13.22
   1  -1   6  184.85   12.91
   1   1   6  178.42    9.07
   1  -1   6  185.68    9.14
  -1   1  -6  184.21   11.95
  -1   1  -7  265.70   11.98
  -1  -1  -7  252.21   12.62
   1  -1   7  271.25   18.03
   1   1   7  298.42   18.59
   1   1   7  303.18   13.40
   1  -1   7  294.37   13.31
  -1   1  -7  325.64   17.17
  -1  -1  -7  366.38   21.50
  -1   1  -7  280.28   12.13
  -1  -1  -7  316.76   13.64
   1  -1   8  443.69   25.42
   1   1   8  448.58   25.36
  -1   1  -8  404.71   17.07
  -1   1  -8  417.01   17.29
  -1  -1  -8  449.38   18.55
  -1  -1  -8  393.02   17.35
  -1   1  -8  438.74   17.38
   1   1   8  413.59   18.52
   1  -1   8  444.75   18.81
  -1   1  -8  480.38   23.35
   1   1   8  411.00   17.86
  -1   1  -9  768.50   39.50
  -1  -1  -9  709.88   29.64
  -1   1  -9  625.62   29.19
  -1   1  -9  685.90   30.51
  -1  -1  -9  689.68   35.64
  -1  -1  -9  721.10   30.84
   1   1   9  704.75   29.06
   1  -1   9  707.66   29.10
  -1   1  -9  707.67   27.54
   1   1   9  727.83   37.48
   1  -1   9  619.74   36.08
  -1   1  -9  683.98   27.23
   1   1   9  786.86   28.61
  -1  -1  -9  697.16   27.55
  -1   1  -9  746.06   27.55
  -1  -1  -9  742.55   28.81
  -1   1  -9  788.78   35.24
  -1  -1  -9  836.87   39.08
  -1  -1 -10   46.25    7.74
  -1   1 -10   36.65    4.83
  -1   1 -10   40.99    5.46
  -1   1 -10   48.33    8.83
  -1  -1 -10   39.05    5.37
  -1  -1 -10   46.82    5.16
   1   1  10   36.99    4.37
   1  -1  10   51.88    5.15
  -1   1 -10   43.76    4.04
  -1   1 -10   40.36    3.83
   1  -1  10   42.50    7.76
   1   1  10   37.23    7.25
   1   1  10   40.47    4.19
  -1   1 -10   46.33    4.11
  -1  -1 -10   54.63    4.92
  -1   1 -10   44.76    6.92
  -1  -1 -10   51.60    8.42
  -1   1 -11    8.09    4.06
  -1  -1 -11    5.81    3.25
  -1  -1 -11    4.49    2.21
  -1   1 -11    3.42    2.02
  -1  -1 -11    4.02    1.95
   1   1  11    6.59    3.68
   1  -1  11    3.70    3.26
  -1   1 -11    7.47    1.90
   1  -1  11    3.49    1.88
   1   1  11    4.70    1.95
   1   1  11    4.56    1.61
  -1   1 -11    6.34    1.87
  -1  -1 -11    4.40    1.76
  -1   1 -11    5.47    2.95
  -1  -1 -12    7.75    2.82
  -1  -1 -12    6.34    2.28
  -1   1 -12    5.81    2.63
  -1  -1 -12    4.66    2.93
  -1   1 -12    4.22    3.33
  -1   1 -12    7.11    1.96
   1   1  12    3.11    3.07
   1  -1  12   -0.78    1.89
   1   1  12    4.42    1.96
   1   1  12   10.19    2.22
   1  -1  12    6.15    1.97
  -1   1 -12    5.20    1.74
  -1  -1 -12    8.74    2.24
  -1   1 -12    5.28    3.37
  -1  -1 -13  386.12   21.15
  -1   1 -13  356.92   27.52
  -1   1 -13  371.84   20.77
   1  -1  13  334.85   26.29
   1   1  13  370.04   27.46
   1  -1  13  354.07   17.44
   1   1  13  378.59   18.78
  -1   1 -13  390.58   17.26
  -1  -1 -13  373.21   17.74
  -1   1 -13  418.42   25.68
   1   1  14  206.44   12.20
   1  -1  14  200.33   12.06
  -1   1 -14  220.04   11.12
  -1   1 -14  223.16   14.29
   1  -1  14  215.86   11.36
   1   1  15   39.02    4.24
   1  -1  15   32.83    3.94
  -1   1 -15   36.70    3.51
  -1   1 -15   39.40    5.05
   1  -1  15   34.19    3.42
   1  -1  16   14.29    2.29
   1   1  16   10.53    2.05
  -1   1 -16   13.40    2.70
  -1  -1 -16   15.01    2.06
   1   1  17  123.40    6.60
   1  -1  17  120.44    6.56
  -1   1 -17  153.72    7.60
  -1  -1 -17  145.26    7.54
  -1  -2  17    5.13    1.20
  -1   2  17    7.35    1.43
   1   2 -17    4.73    1.06
   1  -2 -17    4.91    1.28
   1  -2 -17    4.90    1.16
  -1   2  16  185.16    9.78
  -1  -2  16  185.52    9.68
   1   2 -16  183.76    9.08
   1  -2 -16  196.77   11.38
   1   2 -16  204.39   11.42
  -1  -2  16  166.89    8.87
  -1  -2  15    2.33    1.54
  -1   2  15    5.50    1.95
  -1  -2  15    4.34    1.54
   1   2 -15    5.54    1.63
   1   2 -15    2.76    2.18
   1  -2 -15    7.20    2.69
  -1   2  14   18.90    3.30
  -1  -2  14   22.08    3.51
   1   2 -14   21.30    2.95
  -1  -2  14   18.57    5.63
  -1   2  14   22.45    6.25
   1  -2 -14   24.73    4.68
   1   2 -14   25.08    4.66
   1   2 -14   20.16    2.88
   1   2 -14   17.03    7.10
   1  -2 -14   11.47    6.02
   1   2 -14   27.07    5.95
   1   2 -13   19.82    2.94
   1   2 -13   17.49    2.75
  -1   2  13   19.11    6.05
  -1  -2  13   14.58    5.21
  -1  -2  13   18.32    3.32
  -1   2  13   18.95    3.47
   1   2 -13   18.64    2.82
   1   2 -13   23.31    5.57
   1   2 -13   22.62    6.81
   1  -2 -13   17.46    4.26
   1   2 -13   16.93    4.16
   1  -2 -12  141.24   11.45
   1   2 -12  146.59   17.32
   1   2 -12  154.21   11.93
   1   2 -12  139.72    8.55
  -1   2  12  150.14   16.07
   1   2 -12  153.61    8.77
  -1  -2  12  122.01   14.51
  -1   2  12  137.50    9.70
  -1  -2  12  151.93    9.91
   1   2 -12  143.77    8.56
   1   2 -12  147.59    8.31
   1  -2 -12  158.13   10.32
   1   2 -12  164.84   14.46
   1  -2 -11  125.27   10.31
   1   2 -11  122.77   10.25
   1   2 -11  128.63   15.62
  -1   2  11  128.14   14.11
   1   2 -11  121.70    7.71
  -1  -2  11  132.23   14.13
   1   2 -11  129.30    7.82
  -1  -2  11  128.63    8.81
  -1   2  11  141.71    9.22
   1   2 -11  132.70    7.96
   1  -2 -11  149.07    9.96
   1   2 -11  163.06   13.69
   1   2 -10   45.24    8.57
   1  -2 -10   49.94    5.14
   1  -2 -10   37.68    5.98
   1  -2 -10   47.27    5.64
   1   2 -10   47.91    5.75
  -1  -2  10   56.52    8.61
   1   2 -10   56.33    4.48
   1   2 -10   50.02    4.32
  -1   2  10   49.36    8.22
  -1  -2  10   51.26    4.91
  -1  -2  10   58.84    5.25
  -1   2  10   48.69    4.89
   1   2 -10   61.25    4.75
   1  -2 -10   55.02    5.14
   1  -2 -10   69.21    6.51
   1   2 -10   59.85    7.88
   1   2  -9   46.12    5.22
   1  -2  -9   50.29    5.36
   1  -2  -9   42.34    5.87
  -1  -2   9   50.74    4.64
  -1   2   9   59.71    4.91
  -1  -2   9   50.34    4.55
   1   2  -9   44.20    3.81
   1   2  -9   44.84    3.95
  -1   2   9   47.88    7.27
  -1  -2   9   44.84    6.95
   1   2  -9   46.11    4.00
   1  -2  -9   45.90    4.62
   1  -2  -9   60.75    6.25
   1   2  -9   60.54    7.58
   1  -2  -8  526.89   27.28
  -1  -2   8  654.86   25.40
  -1  -2   8  638.27   25.16
  -1   2   8  632.14   25.18
   1   2  -8  622.65   24.55
   1   2  -8  620.40   24.25
  -1   2   8  660.08   31.80
  -1  -2   8  638.66   31.42
  -1  -2   8  704.55   25.08
   1   2  -8  607.23   24.14
   1  -2  -8  594.74   25.79
   1   2  -8  622.57   24.72
   1   2  -8  685.45   31.94
   1  -2  -7 1445.53   62.09
  -1  -2   7 1835.08   60.51
  -1  -2   7 1793.65   60.70
  -1   2   7 1891.29   60.63
   1   2  -7 1635.39   59.60
   1   2  -7 1640.33   59.95
  -1   2   7 1857.46   67.11
  -1  -2   7 1821.76   66.85
  -1  -2   7 1798.24   59.75
   1   2  -7 1577.00   59.32
   1   2  -7 1649.46   60.10
   1   2  -7 1638.16   59.55
   1  -2  -7 1633.52   61.50
   1  -2  -7 2197.24   69.18
   1   2  -7 1793.95   67.86
  -1  -2   7 1688.85   59.79
  -1  -2   6 1104.77   37.13
  -1   2   6 1082.66   41.85
  -1  -2   6 1131.01   42.22
   1   2  -6  932.25   36.40
  -1  -2   6  997.86   36.26
   1   2  -6 1089.02   43.53
   1  -2  -6  925.63   38.05
   1   2  -6 1115.08   38.41
   1  -2  -6  959.41   42.39
   1   2  -6 1135.40   44.54
   1  -2  -6  916.74   38.03
   1   2  -5  790.19   33.56
   1   2  -5  728.82   29.32
   1  -2  -5  749.56   28.93
   1   2  -5  817.55   34.20
  -1  -2   5  847.54   32.24
   1  -2  -4  964.69   34.98
   1   2  -4  966.16   39.34
   1   2  -3 1923.96   72.52
  -1   2   3 1994.29   71.28
  -1  -2   3 2006.05   71.28
   1   2  -2  449.65   21.29
   1  -2  -2  575.00   21.28
   1   2  -2  621.51   21.67
   1  -2  -2  494.13   22.14
   1   2  -2  609.65   22.68
  -1   2   2  517.64   20.18
  -1  -2   2  525.79   20.18
   1   2  -1  960.85   43.15
   1  -2  -1 1190.46   41.24
   1  -2  -1 1037.80   42.67
   1   2  -1 1283.68   41.48
   1   2  -1 1348.07   43.42
  -1  -2   1 1208.72   42.61
   1   2   0   75.12    3.45
   1  -2   0   79.14    3.52
   1  -2   0   69.10    4.47
   1  -2   0   65.57    2.94
  -1  -2   0   77.58    4.72
  -1  -2  -1 1496.08   55.13
  -1   2  -1 1688.64   55.48
  -1   2  -2  743.55   28.14
  -1  -2  -2  805.09   29.79
  -1   2  -2  860.13   30.08
   1   2   2  753.52   29.83
   1  -2   2  778.47   29.95
   1   2   3   26.10    3.38
   1  -2   3   20.79    2.96
  -1  -2  -3   23.70    3.91
  -1   2  -3   22.50    3.03
   1  -2   4  582.44   26.37
   1   2   4  619.39   26.82
  -1  -2  -4  672.64   29.69
  -1   2  -4  627.11   26.96
   1  -2   5  297.28   16.39
   1   2   5  307.18   16.70
  -1   2  -5  264.38   15.96
  -1  -2  -5  333.87   19.07
   1  -2   6   37.56    3.25
   1   2   6   25.36    2.83
   1  -2   6   27.66    2.93
   1   2   6   34.02    5.17
   1  -2   6   39.89    5.53
  -1   2  -6   25.75    2.48
   1  -2   6   28.86    2.87
  -1   2  -6   24.66    2.52
  -1  -2  -6   20.08    3.27
  -1   2  -6   31.06    4.87
   1  -2   7   48.85    6.82
  -1   2  -7   42.39    3.42
   1   2   7   53.93    4.43
   1  -2   7   49.45    4.23
  -1   2  -7   41.57    3.49
  -1  -2  -7   43.27    4.73
  -1   2  -7   46.95    6.20
  -1  -2  -8  104.47    9.64
   1  -2   8  120.39   11.98
  -1   2  -8  111.93    6.41
   1   2   8  108.78   11.31
  -1   2  -8  110.54    6.16
   1   2   8  116.31    7.54
   1  -2   8  121.91    7.63
  -1   2  -8  108.87    6.45
  -1   2  -8  127.82   10.67
  -1  -2  -9    2.85    1.50
  -1  -2  -9    6.50    2.63
  -1  -2  -9    4.57    1.91
  -1   2  -9    4.02    1.79
   1   2   9    4.13    2.73
   1  -2   9    4.15    2.86
  -1   2  -9    2.99    1.13
   1  -2   9    5.21    1.70
   1   2   9    3.99    1.67
  -1   2  -9    5.00    1.30
  -1  -2  -9    3.57    1.65
  -1   2  -9    4.46    1.36
  -1   2  -9    5.42    2.66
  -1  -2 -10  435.57   25.96
  -1  -2 -10  458.99   23.05
  -1   2 -10  447.43   22.78
  -1   2 -10  485.85   32.02
  -1  -2 -10  473.06   21.76
   1   2  10  468.30   29.40
   1  -2  10  468.89   29.50
  -1   2 -10  468.92   19.35
   1  -2  10  500.84   21.52
   1   2  10  446.59   20.96
  -1   2 -10  453.41   19.30
  -1  -2 -10  485.97   21.38
  -1  -2 -10  433.45   19.36
  -1   2 -10  541.03   27.21
  -1  -2 -11  966.93   38.48
  -1  -2 -11  931.62   40.38
  -1   2 -11  917.07   51.36
  -1   2 -11  911.21   40.13
   1  -2  11  921.64   37.60
   1   2  11  980.92   37.98
   1   2  11  980.78   48.67
   1  -2  11  943.25   48.25
  -1   2 -11  901.27   35.46
  -1   2 -11  926.24   35.53
  -1  -2 -11  921.14   37.32
  -1   2 -11 1074.44   45.35
  -1  -2 -12   12.08    3.32
  -1  -2 -12    6.40    2.31
  -1   2 -12   11.17    3.27
  -1   2 -12   10.90    4.91
   1  -2  12    9.79    2.50
   1   2  12    9.73    2.55
  -1   2 -12   11.00    2.16
   1  -2  12    6.57    3.39
   1   2  12   12.66    4.88
   1  -2  12   16.41    3.10
  -1   2 -12   12.56    2.24
  -1   2 -12   10.66    3.73
   1  -2  13  147.83   10.19
   1   2  13  169.73   10.72
  -1   2 -13  173.79    9.45
  -1   2 -13  170.98    9.41
  -1   2 -13  199.24   16.06
  -1  -2 -13  176.58   12.74
  -1   2 -13  175.74   18.94
  -1   2 -13  187.42   12.93
   1  -2  13  167.08   10.47
   1  -2  14  232.05   12.53
   1   2  14  219.23   12.50
  -1   2 -14  238.16   11.50
  -1   2 -14  224.99   14.25
  -1  -2 -14  248.85   14.86
   1  -2  14  224.71   12.13
   1  -2  15  200.67   11.15
   1   2  15  236.18   11.80
  -1   2 -15  222.90   10.62
  -1  -2 -15  255.77   13.73
  -1   2 -15  256.11   13.68
   1  -2  15  206.17   10.85
  -1  -2 -15  228.96   11.44
   1   2  16   14.99    2.21
   1  -2  16   15.89    2.21
  -1  -2 -16   16.81    2.75
  -1   2 -16   16.02    2.70
   1  -2  16   14.85    1.90
  -1  -2 -16   15.07    1.98
   1  -3 -17   34.35    2.96
  -1  -3  16    3.44    1.15
   1  -3 -16    5.24    1.51
   1   3 -16    4.81    1.19
  -1  -3  16    3.64    1.19
  -1   3  16    5.03    1.33
  -1  -3  15   12.27    2.40
   1   3 -15   12.83    2.06
  -1   3  15   17.87    2.73
  -1  -3  15   12.97    2.28
   1   3 -15   14.11    3.07
   1  -3 -15   17.59    3.41
   1   3 -14  545.71   21.92
  -1   3  14  532.63   23.36
  -1  -3  14  502.44   22.76
   1  -3 -14  566.32   26.35
   1   3 -14  561.08   26.03
   1   3 -14  521.93   21.82
   1   3 -13   16.85    6.16
   1  -3 -13   32.22    5.23
   1   3 -13   22.75    4.57
   1   3 -13   25.71    3.16
  -1   3  13   20.47    6.15
   1   3 -13   24.06    3.06
  -1  -3  13   18.97    5.86
  -1   3  13   23.01    3.65
  -1  -3  13   18.88    3.26
   1   3 -13   21.15    2.91
   1  -3 -13   19.25    7.26
   1   3 -13   25.32    8.43
   1   3 -13   31.07    6.09
   1  -3 -12  144.70   11.42
   1   3 -12  134.57   17.19
   1   3 -12  137.38   11.02
   1   3 -12  132.93    8.14
   1   3 -12  148.79    8.51
  -1   3  12  138.76   15.57
  -1  -3  12  148.09   15.40
  -1  -3  12  143.72    9.47
  -1   3  12  142.00    9.64
   1   3 -12  142.71    8.32
   1  -3 -12  104.82   16.66
   1   3 -12   96.83   16.08
   1   3 -12  151.89   13.61
  -1  -3  11   68.44    6.09
  -1   3  11   60.66    5.94
   1   3 -11   60.44    4.95
  -1   3  11   64.81   10.23
  -1  -3  11   57.44    9.50
   1   3 -11   71.91    5.28
   1   3 -11   65.18    5.11
   1  -3 -11   53.30    6.50
   1   3 -11   55.60    6.65
   1   3 -11   66.16    8.67
  -1  -3  10  142.12    9.01
  -1   3  10  142.65    9.14
  -1  -3  10  147.68    9.43
   1   3 -10  131.79    7.76
   1   3 -10  139.64    7.97
  -1   3  10  140.65   14.50
  -1  -3  10  141.34   14.12
   1   3 -10  131.99    7.94
   1  -3 -10  123.91    9.81
   1  -3 -10  141.60    8.99
   1   3 -10  128.69    9.97
   1   3 -10  146.13   12.95
  -1   3   9   37.65    4.03
  -1  -3   9   33.71    3.88
  -1  -3   9   23.96    3.22
  -1  -3   9   24.73    5.48
  -1   3   9   27.12    5.89
   1   3  -9   26.89    3.06
   1   3  -9   29.40    3.06
  -1  -3   9   31.84    3.53
   1   3  -9   25.08    3.03
   1   3  -9   24.27    2.77
   1   3  -9   29.65    7.04
   1  -3  -9   32.74    3.72
   1  -3  -9   31.29    4.30
   1   3  -9   34.07    4.50
   1  -3  -9   25.85    2.91
   1   3  -9   27.00    5.45
  -1  -3   8   29.95    3.27
  -1  -3   8   26.50    3.24
  -1   3   8   23.58    2.97
   1   3  -8   24.38    2.83
   1   3  -8   24.66    2.66
  -1  -3   8   29.09    5.36
  -1   3   8   25.57    5.12
  -1  -3   8   23.09    2.72
   1   3  -8   26.67    2.73
   1   3  -8   26.55    2.69
   1   3  -8   23.55    2.88
   1   3  -8   28.98    5.49
  -1  -3   8   22.13    2.74
   1  -3  -8   21.80    2.60
   1   3  -8   28.49    6.33
   1   3  -7  409.58   24.71
  -1   3   7  448.28   17.16
  -1  -3   7  436.15   16.96
  -1   3   7  461.76   22.96
  -1  -3   7  453.75   22.65
   1   3  -7  382.43   15.99
   1   3  -7  368.49   16.31
  -1  -3   7  390.23   16.17
   1   3  -7  372.70   15.85
   1   3  -7  368.34   15.98
   1   3  -7  358.60   15.88
   1   3  -7  433.55   17.83
   1   3  -7  411.02   22.96
   1  -3  -7  394.78   16.28
  -1  -3   7  416.66   16.68
  -1  -3   6   26.75    2.65
   1  -3  -6   26.28    2.61
   1   3  -6   40.43    5.69
  -1   3   6   34.81    4.85
  -1  -3   6   27.09    4.23
   1   3  -6   30.77    2.65
  -1  -3   6   30.22    2.64
   1   3  -6   25.85    2.48
   1   3  -6   27.33    2.62
   1   3  -6   24.11    2.39
   1   3  -6   27.26    3.22
   1   3  -6   28.69    5.37
  -1   3   5  740.70   29.90
  -1  -3   5  715.14   29.53
   1   3  -5  740.83   33.13
  -1  -3   5  668.50   25.50
  -1  -3   5  688.71   26.13
   1   3  -5  707.57   31.48
  -1  -3   5  689.21   25.82
   1   3  -4  440.43   21.70
  -1   3   4  445.90   19.95
  -1  -3   4  456.80   19.95
   1   3  -3   65.82    6.17
  -1  -3   3   54.42    4.23
  -1   3   3   59.83    4.45
   1   3  -3   53.66    4.97
   1   3  -3   63.49    5.29
   1  -3  -3   64.08    6.51
   1  -3  -3   64.05    5.15
  -1  -3   2  387.48   16.50
   1   3  -2  427.28   17.66
  -1   3   2  335.81   13.67
  -1  -3   2  292.28   13.36
   1   3  -2  326.48   16.64
   1  -3  -2  355.37   17.63
   1  -3  -2  362.89   14.21
   1   3  -2  414.79   14.74
   1   3  -1  455.26   22.80
   1  -3  -1  465.03   22.15
  -1   3   1  536.20   18.56
  -1  -3   1  497.76   21.04
   1   3  -1  572.09   21.96
  -1  -3   0 2614.03   98.70
   1  -3   0 2460.69   96.60
  -1  -3  -1  326.57   17.41
   1  -3   1  294.75   14.15
   1  -3   1  317.35   12.66
   1  -3   1  315.05   11.82
   1   3   1  323.99   11.87
  -1   3  -2    0.60    0.72
  -1  -3  -2    1.34    1.47
  -1   3  -3   66.48    4.55
  -1   3  -3   75.39    6.27
   1   3   3   74.11    5.91
   1  -3   3   71.33    5.92
  -1   3  -4 2036.40   72.63
   1  -3   4 2080.63   72.13
   1   3   4 2064.38   72.15
   1  -3   4 1840.00   66.90
   1   3   5  237.86   14.21
   1  -3   5  217.31   13.63
   1  -3   5  196.90    9.48
   1  -3   5  229.43   10.54
  -1   3  -5  231.86   14.26
   1   3   6  581.34   21.14
   1  -3   6  528.35   20.55
   1   3   6  634.75   27.80
  -1   3  -6  452.37   19.57
   1  -3   6  570.12   26.61
   1  -3   6  523.81   20.26
  -1   3  -6  469.56   19.16
  -1   3  -6  536.91   28.86
  -1   3  -6  515.53   26.05
   1  -3   7   53.81    4.39
   1   3   7   51.43    4.48
   1   3   7   55.88    7.55
   1  -3   7   45.37    6.79
  -1   3  -7   44.09    3.60
   1  -3   7   53.67    4.32
  -1   3  -7   44.96    3.76
  -1   3  -7   41.67    3.25
  -1   3  -7   47.98    8.03
  -1   3  -7   45.29    6.49
   1  -3   8  786.71   37.48
   1   3   8  790.48   37.94
  -1   3  -8  692.53   27.34
   1   3   8  778.15   29.43
   1  -3   8  767.17   29.18
  -1   3  -8  663.17   27.52
  -1  -3  -8  772.41   29.78
  -1   3  -8  746.80   40.14
  -1   3  -8  766.82   35.17
  -1  -3  -8  660.02   28.46
   1  -3   9  448.97   27.72
  -1   3  -9  428.18   18.43
   1   3   9  526.69   29.66
   1  -3   9  491.88   20.65
   1   3   9  504.47   20.88
  -1   3  -9  421.67   18.53
  -1  -3  -9  483.30   21.10
  -1   3  -9  443.65   31.01
  -1  -3  -9  417.47   21.50
  -1   3  -9  426.54   21.39
  -1  -3  -9  458.39   19.97
  -1   3  -9  429.11   24.76
   1   3  10   28.55    6.64
   1  -3  10   28.55    6.62
  -1   3 -10   27.33    3.07
   1  -3  10   33.12    4.18
   1   3  10   32.59    4.12
  -1   3 -10   38.25    3.56
  -1   3 -10   32.98    5.98
  -1  -3 -10   29.27    3.60
  -1  -3 -10   26.69    3.90
  -1   3 -10   22.42    6.92
  -1   3 -10   35.99    5.08
  -1  -3 -10   33.71    5.02
  -1  -3 -11   10.98    2.70
  -1  -3 -11    6.27    2.58
  -1   3 -11    8.41    2.83
  -1   3 -11   10.21    1.97
   1  -3  11   13.25    4.67
   1   3  11    8.63    4.14
   1   3  11   10.60    2.62
   1  -3  11    8.41    2.27
  -1   3 -11   10.14    2.05
  -1   3 -11   13.07    3.94
   1   3  12  144.63    9.47
   1  -3  12  130.18    8.96
  -1   3 -12  130.82    7.83
  -1   3 -12  123.46    7.64
  -1  -3 -12  142.07    9.65
  -1   3 -12  116.38   15.89
  -1   3 -12  132.80   10.69
  -1  -3 -12  142.23   11.11
   1  -3  12  132.01    9.36
  -1   3 -12  142.95   12.99
   1  -3  13   83.89    6.77
   1   3  13  102.56    7.50
  -1   3 -13   93.12    6.22
  -1   3 -13   84.41    5.90
   1  -3  13   85.72    7.10
  -1   3 -13   92.66   10.30
  -1  -3 -13   95.84    8.74
  -1   3 -13   97.24    8.71
  -1   3 -13   89.54   13.29
   1  -3  14    8.50    2.20
  -1  -3 -14    6.18    2.03
   1  -3  14    8.71    1.92
   1   3  14    9.69    2.00
  -1   3 -14    8.89    1.82
  -1   3 -14    9.54    2.83
  -1  -3 -14    5.95    2.38
   1  -3  15    6.94    1.74
  -1  -3 -15    4.54    1.47
   1   3  15    5.38    1.41
   1   3  15    5.21    1.49
   1  -3  15    4.74    1.42
  -1   3 -15    5.01    1.34
  -1   3 -15    5.82    1.97
  -1   3 -16  127.56    6.99
  -1  -3 -16  133.49    6.49
   1  -3  16  113.76    6.24
  -1  -3 -17    0.93    0.63
   1  -4 -17  104.55    5.20
  -1  -4  16   87.23    5.34
   1   4 -16   74.26    4.45
   1  -4 -16  104.29    6.42
   1  -4 -16   88.28    5.35
  -1  -4  16   68.64    4.66
   1  -4 -16   84.39    5.25
  -1  -4  15    7.44    1.82
   1  -4 -15    8.16    2.02
   1   4 -15    8.29    1.57
   1   4 -15    7.32    1.53
  -1   4  14   27.35    3.33
   1   4 -14   36.70    3.46
   1  -4 -14   38.78    4.57
   1   4 -14   33.70    3.26
   1   4 -14   29.47    3.91
  -1  -4  14   31.10    3.90
   1   4 -13   47.57    4.22
  -1  -4  13   42.99    4.54
  -1   4  13   51.07    4.85
   1   4 -13   43.15    4.02
   1   4 -13   46.83    7.31
   1   4 -13   38.30    5.06
   1  -4 -13   42.60    5.59
   1  -4 -12  216.85   14.12
   1   4 -12  193.32   13.00
   1   4 -12  210.95   21.92
  -1  -4  12  202.35   18.57
   1   4 -12  222.71   11.28
  -1  -4  12  234.83   12.64
  -1   4  12  236.63   12.61
   1   4 -12  220.24   11.28
   1  -4 -12  188.04   21.63
   1   4 -12  256.93   18.08
   1  -4 -11   89.51    8.39
   1   4 -11   87.98    7.93
   1   4 -11   82.69   13.50
  -1  -4  11  106.39   12.83
   1   4 -11  104.59    6.58
  -1   4  11  103.76   12.76
   1   4 -11   99.33    6.64
  -1   4  11   97.92    7.47
  -1  -4  11  114.04    7.98
   1   4 -11   98.65    6.66
   1  -4 -11   61.17   12.14
   1   4 -11   63.35   11.70
   1   4 -11  107.35   11.59
   1  -4 -10  549.04   26.60
   1   4 -10  558.63   37.87
  -1  -4  10  664.20   26.11
  -1   4  10  612.01   25.61
  -1  -4  10  561.40   25.70
   1   4 -10  582.76   24.13
   1   4 -10  660.42   24.29
  -1  -4  10  632.08   34.96
  -1   4  10  619.14   34.62
   1   4 -10  597.94   24.39
   1  -4 -10  602.76   24.17
   1   4 -10  606.24   32.38
   1   4 -10  435.28   33.62
   1  -4 -10  420.33   33.82
   1   4  -9    0.74    3.84
   1  -4  -9    0.75    4.41
   1  -4  -9    1.49    2.27
   1   4  -9    3.24    3.38
  -1  -4   9    1.39    1.21
  -1   4   9    3.95    1.56
  -1   4   9    0.58    2.56
   1   4  -9    2.88    1.24
  -1  -4   9    2.94    2.46
  -1  -4   9    2.40    1.24
   1   4  -9    2.43    1.20
   1   4  -9    3.63    1.25
   1   4  -9    2.99    1.12
   1   4  -9    2.87    1.27
   1  -4  -9    1.94    1.13
   1   4  -9    4.88    2.92
   1   4  -8  234.92   19.90
  -1   4   8  250.33   11.99
  -1  -4   8  240.69   11.82
  -1  -4   8  247.07   17.45
   1   4  -8  215.75   11.15
  -1   4   8  272.21   18.27
   1   4  -8  241.71   11.11
  -1  -4   8  238.48   11.35
   1   4  -8  215.91   10.78
   1   4  -8  218.10   10.61
   1   4  -8  204.36   10.51
   1  -4  -8  180.70   17.01
   1   4  -8  233.62   17.44
  -1  -4   8  238.62   11.78
   1  -4  -8  228.99   11.34
   1   4  -7  491.59   29.30
  -1  -4   7  484.70   20.16
  -1  -4   7  502.01   19.60
   1   4  -7  504.47   19.15
  -1  -4   7  518.30   25.90
  -1   4   7  509.04   25.77
  -1  -4   7  462.24   19.15
   1   4  -7  458.10   18.92
   1   4  -7  448.08   18.73
   1   4  -7  439.22   18.73
   1  -4  -7  455.13   19.36
   1   4  -7  487.73   26.97
  -1  -4   7  484.35   19.77
   1   4  -7  411.40   26.18
   1  -4  -7  375.85   25.28
   1   4  -6 1005.55   46.49
   1  -4  -6 1028.22   46.53
   1   4  -6 1175.70   50.26
  -1  -4   6 1113.75   40.18
   1   4  -6 1104.18   39.10
  -1  -4   6 1121.82   44.87
  -1   4   6 1074.63   44.64
  -1  -4   6 1110.20   39.38
   1   4  -6 1045.57   38.24
   1   4  -6 1071.64   38.91
   1   4  -6 1064.33   41.11
   1  -4  -6 1002.58   39.40
   1   4  -6 1209.63   48.45
   1   4  -5   27.29    5.27
  -1  -4   5   28.08    2.93
  -1   4   5   23.35    3.73
   1   4  -5   27.41    2.56
  -1  -4   5   21.91    3.70
  -1  -4   5   30.52    2.83
   1   4  -5   27.16    2.41
   1  -4  -5   23.97    4.39
   1   4  -5   24.86    4.42
   1  -4  -5   29.94    2.96
   1   4  -5   29.70    5.02
  -1  -4   4  277.23   12.05
  -1   4   4  245.51   13.10
  -1  -4   4  246.20   13.19
   1   4  -4  333.40   18.43
   1  -4  -4  229.40   12.89
  -1  -4   4  281.83   11.82
  -1  -4   4  304.18   12.30
   1  -4  -4  277.84   12.19
   1   4  -4  274.45   16.18
   1   4  -4  271.29   14.24
   1  -4  -4  290.08   14.48
  -1  -4   3    8.58    1.57
  -1  -4   3   13.79    2.86
   1   4  -3   18.51    3.74
   1   4  -3   20.02    3.39
  -1  -4   3   13.96    1.82
   1  -4  -3   12.35    2.00
   1  -4  -3   13.40    1.88
   1  -4  -3    9.85    2.90
   1  -4  -3   10.16    1.67
  -1  -4   2  758.79   27.88
   1   4  -2  732.62   32.87
   1  -4  -2  715.70   28.05
   1  -4  -2  737.56   33.21
  -1  -4   2  810.52   31.39
   1  -4  -1  122.66    6.30
   1   4  -1  120.91    9.90
   1  -4  -1  126.17    9.35
  -1  -4   1  103.37    9.28
   1   4  -1  136.39    8.49
  -1  -4   1  120.61    8.03
   1  -4   0  383.72   15.80
   1   4   0  364.72   21.10
  -1  -4   0  395.90   21.72
   1  -4   0  393.64   19.36
   1  -4   1  292.46   12.59
  -1  -4  -1  319.54   13.37
   1  -4   1  293.30   15.37
  -1  -4  -1  289.69   18.56
   1  -4   2 1163.35   41.91
  -1  -4  -2 1206.66   43.06
   1  -4   2 1227.24   43.54
  -1   4  -2 1304.31   47.83
  -1   4  -2 1134.61   45.40
   1  -4   2 1125.40   44.89
  -1  -4  -2 1167.95   50.96
  -1   4  -3  685.84   28.09
   1  -4   3  687.19   26.00
  -1  -4  -3  760.22   35.72
  -1   4  -3  698.11   32.28
   1  -4   3  723.20   26.23
  -1   4  -4   88.95    8.95
   1  -4   4   85.21    5.28
  -1  -4  -4   88.21    9.99
  -1   4  -4   80.41    7.85
   1  -4   4   77.74    4.78
  -1  -4  -4   57.13    4.84
  -1  -4  -4   61.30    5.41
  -1   4  -5    0.97    1.35
   1  -4   5    1.33    0.86
  -1  -4  -5    0.44    1.05
   1  -4   5    0.74    0.90
  -1  -4  -5    0.57    1.36
  -1  -4  -5    0.96    0.97
  -1   4  -5   -0.38    1.19
   1  -4   5    1.49    0.83
   1  -4   6  706.39   26.46
   1  -4   6  703.10   26.71
  -1  -4  -6  683.23   29.56
  -1   4  -6  664.03   25.47
  -1   4  -6  675.34   25.63
  -1   4  -6  667.33   35.92
  -1   4  -6  776.70   34.84
  -1  -4  -6  674.70   27.60
   1  -4   7  288.20   13.25
   1  -4   7  305.63   19.04
  -1   4  -7  266.88   12.67
   1   4   7  335.81   19.81
   1  -4   7  300.56   13.65
  -1   4  -7  269.20   12.14
  -1   4  -7  255.74   20.73
  -1   4  -7  285.06   19.00
  -1  -4  -7  287.89   14.23
   1   4   8  316.92   20.68
   1  -4   8  302.46   20.26
  -1   4  -8  268.04   12.98
   1  -4   8  300.68   14.07
   1   4   8  333.31   14.58
  -1   4  -8  260.56   13.19
  -1  -4  -8  283.94   14.70
  -1   4  -8  264.76   18.97
  -1  -4  -8  319.94   14.92
  -1   4  -8  270.83   23.20
  -1  -4  -9    3.97    1.60
  -1  -4  -9    1.11    1.51
  -1   4  -9    7.89    4.05
  -1   4  -9    3.35    1.26
   1   4   9    3.59    1.55
   1  -4   9    5.35    1.83
  -1   4  -9    4.36    1.46
  -1   4  -9    5.05    2.90
  -1  -4  -9    5.32    1.75
   1  -4  10  431.45   18.41
   1   4  10  421.93   18.31
  -1   4 -10  369.16   16.32
  -1   4 -10  355.17   16.31
  -1   4 -10  388.44   23.43
  -1  -4 -10  361.41   17.62
  -1  -4 -10  414.80   18.63
  -1   4 -10  303.71   17.99
  -1   4 -10  350.89   28.88
  -1  -4 -10  347.64   19.37
  -1   4 -11  107.50   15.62
  -1  -4 -11  130.84   10.47
  -1  -4 -11  130.59    9.06
  -1   4 -11  119.51    9.57
   1  -4  11  146.66    9.23
   1   4  11  127.19    8.72
  -1   4 -11  132.46    7.79
  -1  -4 -11  151.22   10.40
  -1   4 -11  131.56    7.75
   1   4  11  127.47   12.43
  -1  -4 -11  127.65    8.19
  -1   4 -11  139.21   12.82
   1  -4  12  479.07   21.25
   1   4  12  484.30   21.25
  -1   4 -12  483.73   19.89
  -1  -4 -12  558.99   23.61
  -1   4 -12  461.95   19.68
   1  -4  12  454.64   21.75
  -1   4 -12  521.15   27.60
  -1   4 -12  418.06   33.01
  -1  -4 -12  486.93   23.84
  -1   4 -12  420.06   22.12
   1  -4  13    9.57    2.16
   1   4  13    9.27    2.14
  -1   4 -13   10.00    1.88
  -1   4 -13    9.19    2.54
  -1   4 -13    9.78    1.83
  -1  -4 -13    9.52    2.54
   1  -4  13    9.69    2.40
  -1   4 -14   97.08    5.91
   1  -4  14  118.13    7.54
  -1   4 -14   97.47    7.06
   1  -4  14   98.37    6.80
  -1  -4 -14  108.25    7.34
  -1   4 -15    9.83    1.52
   1   4  15    6.77    1.44
   1  -4  15   10.88    1.86
  -1  -4 -15   10.84    1.95
  -1  -4 -16  184.95    9.12
   1  -5 -16    3.88    1.15
  -1  -5  16    4.78    1.05
  -1  -5  15   14.95    2.14
   1  -5 -15   18.83    2.48
   1  -5 -15   17.10    2.44
   1   5 -15   12.79    1.71
   1  -5 -15   16.11    2.79
  -1  -5  15   17.35    2.55
   1   5 -14   68.74    4.57
   1  -5 -14   75.09    6.01
   1  -5 -14   77.05    6.14
  -1  -5  14   58.93    5.01
   1  -5 -14   76.81    7.14
   1   5 -14   64.17    4.42
   1   5 -13   60.06    4.57
   1  -5 -13   65.40    6.55
   1  -5 -13   61.90    6.02
   1   5 -13   54.64    4.38
   1   5 -12   14.68    2.40
   1  -5 -12   17.67    3.62
   1   5 -12   15.84    2.49
   1   5 -12   14.28    4.09
   1  -5 -12   19.28    4.12
   1   5 -11   36.45    3.74
   1  -5 -11   30.74    5.29
   1  -5 -11   25.33    3.16
   1   5 -11   38.97    6.97
   1   5 -11   28.36    7.95
   1   5 -11   23.54    3.12
   1   5 -10  643.33   26.80
   1   5 -10  660.59   27.10
   1   5 -10  671.95   26.31
   1   5 -10  699.52   36.19
   1  -5 -10  701.57   27.38
   1   5 -10  593.51   40.02
   1   5  -9    4.26    3.36
  -1  -5   9    3.27    1.57
   1   5  -9    4.97    1.68
  -1  -5   9    3.03    1.57
   1   5  -9    5.34    1.55
   1   5  -9    6.57    1.57
   1   5  -9    3.79    1.31
   1   5  -9    4.11    1.50
   1   5  -9    4.82    2.79
   1  -5  -9    4.73    1.61
  -1  -5   8  428.48   19.65
   1   5  -8  455.82   18.14
   1   5  -8  420.85   18.64
  -1  -5   8  418.97   18.52
   1   5  -8  389.93   17.64
   1   5  -8  425.95   17.84
   1   5  -8  420.92   18.08
   1   5  -8  355.88   27.85
   1  -5  -8  420.78   18.78
   1   5  -8  465.47   27.49
  -1  -5   7    7.09    1.95
   1   5  -7    6.53    1.54
   1  -5  -7    4.81    2.52
  -1  -5   7    7.13    1.74
   1   5  -7    6.59    1.61
   1   5  -7    8.28    1.71
   1   5  -7    7.63    1.72
   1   5  -7    8.44    4.04
   1  -5  -7    6.73    1.81
   1   5  -7    9.66    3.72
  -1  -5   6  515.33   21.42
   1   5  -6  560.83   20.61
  -1  -5   6  538.40   20.83
   1  -5  -6  474.43   23.60
   1  -5  -6  405.73   24.35
   1   5  -6  501.14   19.52
   1   5  -6  510.35   20.21
   1   5  -6  531.83   30.67
  -1  -5   6  341.66   25.02
  -1  -5   6  466.73   20.47
   1  -5  -6  506.65   21.15
   1   5  -6  554.30   29.31
  -1  -5   5   53.74    4.51
   1   5  -5   56.37    4.06
   1   5  -5   46.76    3.61
   1  -5  -5   48.91    5.05
   1  -5  -5   37.89    5.05
  -1  -5   5   51.34    4.16
   1   5  -5   46.02    6.87
  -1  -5   5   49.38    4.10
   1  -5  -5   48.85    4.34
   1   5  -5   54.13    8.17
  -1  -5   5   30.98    5.55
   1   5  -4 1184.63   47.01
  -1  -5   4  960.35   42.29
  -1  -5   4 1028.66   37.41
  -1  -5   4  980.23   36.84
   1  -5  -4  977.98   37.59
   1   5  -4 1119.12   45.01
   1  -5  -4 1037.58   38.52
   1  -5  -4  913.56   38.83
  -1  -5   4 1008.50   36.95
   1  -5  -3  200.04   10.92
   1  -5  -3  230.34   10.88
   1  -5  -3  196.71    9.80
  -1  -5   3  203.37    9.99
  -1  -5   3  230.08    9.77
  -1  -5   3  226.79   10.38
   1   5  -3  207.35   13.78
  -1  -5   3  208.97   13.30
   1   5  -3  246.16   15.54
   1  -5  -3  221.62   15.69
  -1  -5   2    3.41    0.99
   1  -5  -2    5.13    1.30
   1   5  -2    4.92    2.36
  -1  -5   2    4.54    1.20
   1  -5  -2    4.99    2.27
   1  -5  -2    4.74    1.25
   1   5  -2    2.76    1.60
  -1  -5   2    4.25    1.74
   1  -5  -2    3.57    0.99
   1  -5  -2    3.37    1.23
  -1  -5   1   69.90    4.58
  -1  -5   1   71.09    4.62
   1  -5  -1   71.48    4.79
   1   5  -1   65.25    8.01
   1  -5  -1   60.82    6.92
  -1  -5   1   62.41    8.31
  -1  -5   1   75.51    4.89
   1  -5  -1   71.85    4.69
   1  -5  -1   67.61    4.28
  -1  -5   0  679.08   25.34
   1  -5   0  675.12   24.99
   1  -5   0  613.93   24.07
   1   5   0  671.23   33.54
  -1  -5   0  599.84   33.00
   1  -5   0  606.38   28.97
   1  -5   0  686.91   24.94
  -1  -5   0  622.48   25.13
  -1  -5   0  679.29   25.15
  -1   5  -1  168.76   10.33
   1  -5   1  140.74    7.16
   1  -5   1  161.66    7.86
  -1  -5  -1  167.86    8.64
   1  -5   1  151.97    7.46
  -1   5  -1  160.72   12.17
   1   5   1  152.17   13.52
  -1  -5  -1  168.93   14.53
   1  -5   1  142.24   10.26
  -1  -5  -1  141.73    8.08
   1  -5   1  144.41    7.43
  -1  -5  -1  155.38    8.09
  -1   5  -2   13.56    3.05
   1  -5   2   13.76    1.80
  -1  -5  -2   13.26    2.24
  -1   5  -2   14.96    3.36
  -1  -5  -2   16.49    4.63
   1  -5   2   14.18    2.82
   1  -5   2   11.72    1.78
  -1  -5  -2   10.36    1.89
  -1   5  -3   71.91    6.37
  -1  -5  -3   58.90    5.05
   1  -5   3   59.42    4.24
  -1   5  -3   67.40    7.84
   1  -5   3   60.61    5.36
   1  -5   3   54.40    5.55
  -1  -5  -3   81.02   10.33
   1  -5   3   62.52    4.42
   1  -5   4  446.49   17.47
  -1   5  -4  501.29   24.81
  -1   5  -4  420.14   24.54
   1  -5   4  354.05   19.58
  -1  -5  -4  524.09   29.25
   1  -5   4  355.48   19.63
  -1  -5  -5  189.70   11.12
   1  -5   5  215.55   10.53
  -1   5  -5  241.05   16.69
  -1  -5  -5  198.11   12.62
  -1   5  -5  179.88   16.02
  -1  -5  -5  260.83   20.19
   1  -5   6   35.38    3.70
  -1  -5  -6   37.86    5.21
  -1   5  -6   37.62    3.34
  -1   5  -6   31.56    3.04
  -1   5  -6   38.20    6.62
  -1  -5  -6   31.24    3.98
  -1   5  -6   25.19    6.14
  -1   5  -7  119.82    7.41
  -1  -5  -7  128.67   10.39
   1  -5   7  129.88    8.09
  -1   5  -7  114.57    6.77
  -1   5  -7  122.97   12.61
  -1  -5  -7  114.21    8.36
  -1   5  -7  107.60   13.45
  -1   5  -8  424.44   18.16
   1  -5   8  451.08   19.65
  -1  -5  -8  460.77   22.82
  -1   5  -8  394.50   18.30
  -1  -5  -8  389.66   19.64
  -1   5  -8  410.27   25.95
  -1   5  -8  369.32   28.46
  -1  -5  -9    5.47    2.00
  -1   5  -9    3.41    2.38
  -1   5  -9    6.53    1.76
  -1  -5  -9    6.93    2.73
  -1   5  -9    5.40    1.79
  -1  -5  -9    7.34    1.93
  -1   5  -9    4.50    3.97
  -1  -5 -10  169.71   10.66
  -1   5 -10  190.87   15.72
  -1   5 -10  166.57    9.30
  -1  -5 -10  189.29   12.67
  -1   5 -10  173.02    9.58
   1   5  10  175.99   16.17
  -1   5 -10  143.30   17.85
  -1  -5 -10  191.95   10.71
   1  -5  11  161.21   10.26
  -1  -5 -11  159.53    9.43
  -1   5 -11  168.09   14.31
  -1   5 -11  156.69    8.63
  -1  -5 -11  183.63   11.75
  -1   5 -11  157.39    8.78
   1   5  11  143.75   13.90
  -1   5 -11  150.08   18.29
  -1   5 -12  132.09    7.69
  -1  -5 -12  164.63   10.38
   1  -5  12  165.07   11.03
  -1   5 -12  138.75    7.69
   1  -5  13   28.08    3.88
  -1  -5 -13   23.29    3.73
  -1  -5 -13   25.53    3.54
  -1   5 -13   22.57    2.56
  -1  -5 -14  511.79   20.90
  -1  -5 -14  545.28   21.70
   1   5  14  471.72   20.05
   1  -5  14  513.38   20.90
  -1   5 -14  479.36   18.90
  -1  -5 -15   25.52    2.51
   1  -5  15   23.42    2.33
  -1  -5 -15   27.06    2.77
   1   5  15   24.53    2.34
   1  -6 -14    4.77    1.39
  -1  -6  14    5.06    1.35
   1  -6 -14    3.76    1.43
   1   6 -14    4.05    0.92
   1   6 -14    4.31    1.02
   1  -6 -14    8.96    2.36
  -1  -6  13    6.26    2.18
   1  -6 -13    6.41    2.02
   1   6 -13    3.37    1.05
  -1  -6  13    2.93    1.31
   1  -6 -13    5.70    1.89
   1   6 -13    3.17    1.07
   1  -6 -13    5.75    2.20
   1   6 -12  236.81   11.47
   1  -6 -12  290.55   15.75
   1   6 -12  244.53   11.65
   1  -6 -12  245.26   15.73
  -1  -6  12  311.07   17.16
   1   6 -11   90.59   10.40
   1   6 -11   93.90    6.23
   1  -6 -11  113.53   10.22
   1   6 -11   86.28    6.14
  -1  -6  11  124.09   11.12
   1  -6 -11   91.71    9.28
   1   6 -10    5.08    3.54
   1   6 -10    4.61    2.67
   1  -6 -10    7.59    2.02
   1   6 -10    9.15    1.97
   1   6 -10    8.40    2.00
   1  -6 -10    5.79    3.09
  -1  -6  10    6.58    3.24
   1   6  -9   97.68    6.99
   1  -6  -9  133.97   13.25
   1  -6  -9   96.40   10.78
  -1  -6   9  118.06    7.80
   1   6  -9   99.61    7.19
   1   6  -9  109.37    6.74
   1   6  -9  104.46    6.52
   1   6  -9  110.00   12.51
   1  -6  -9  100.39    7.41
   1   6  -9   66.16   11.45
   1   6  -8  152.62    9.22
   1  -6  -8  166.59   15.39
  -1  -6   8  163.57    9.39
   1  -6  -8  119.33   11.95
   1   6  -8  149.16    8.59
   1   6  -8  151.64    8.72
   1   6  -8  165.80    8.73
   1   6  -8  172.41   15.98
   1  -6  -8  168.39    9.96
   1   6  -8  120.62   15.16
  -1  -6   7   10.73    3.87
   1   6  -7    5.13    3.42
  -1  -6   7   12.01    2.72
   1   6  -7   24.68    2.79
  -1  -6   7   12.96    2.39
   1  -6  -7   17.45    4.91
   1   6  -7   15.14    2.40
   1   6  -7   14.59    2.28
   1   6  -7   13.67    2.37
  -1  -6   7    4.67    2.94
   1  -6  -7   11.75    3.39
   1   6  -7   19.11    5.27
  -1  -6   7   14.73    2.55
   1  -6  -7   12.84    2.54
  -1  -6   6    7.01    3.02
   1   6  -6   12.00    4.46
   1  -6  -6    4.72    2.22
  -1  -6   6    8.98    2.28
   1   6  -6   13.10    2.15
   1  -6  -6    7.67    2.13
   1  -6  -6    8.78    3.19
  -1  -6   6    9.48    2.05
   1   6  -6    9.10    1.83
  -1  -6   6    2.85    2.14
   1  -6  -6   10.01    2.80
  -1  -6   6    9.00    1.98
   1  -6  -6    8.17    2.08
   1   6  -6    6.60    3.25
   1  -6  -5   41.55    5.34
  -1  -6   5   26.19    5.19
   1   6  -5   39.71    7.40
  -1  -6   5   44.66    4.44
   1   6  -5   44.45    3.81
  -1  -6   5   40.05    3.83
   1  -6  -5   35.29    3.98
   1  -6  -5   38.65    5.35
   1  -6  -5   36.98    4.70
   1   6  -5   42.88    3.58
   1   6  -5   42.22    7.15
  -1  -6   5   40.79    3.89
   1  -6  -5   36.65    4.12
   1  -6  -5   42.92    4.44
  -1  -6   5   24.95    4.63
  -1  -6   5   27.96    5.96
  -1  -6   4   63.78    9.48
   1  -6  -4  122.80    7.31
   1  -6  -4  125.55    7.75
  -1  -6   4   76.00    7.53
   1  -6  -4   97.58    7.82
   1  -6  -4  103.93    6.62
   1  -6  -4  107.30    7.54
  -1  -6   4   90.28    6.41
   1   6  -4   97.75   10.76
  -1  -6   4   79.62    8.67
   1  -6  -4  103.09    8.07
   1   6  -4   89.68    5.50
   1   6  -4   97.43   10.54
  -1  -6   4   96.44    6.30
   1  -6  -3  107.87    7.18
  -1  -6   3   96.98    6.35
   1  -6  -3  100.16    6.36
  -1  -6   3   94.17    6.25
  -1  -6   3  111.39    6.63
   1  -6  -3  105.73    7.13
  -1  -6   3  117.42    6.88
   1  -6  -3  107.33    7.75
   1   6  -3  114.04   10.53
  -1  -6   3  100.42    8.07
  -1  -6   3   82.98   10.80
   1  -6  -3  117.07    7.40
   1  -6  -3  108.24    6.88
  -1  -6   2  278.90   12.77
   1   6  -2  308.76   19.51
   1  -6  -2  253.83   11.74
  -1  -6   2  274.55   12.39
   1  -6  -2  274.97   13.27
  -1  -6   2  297.38   14.77
   1  -6  -2  286.98   13.32
   1  -6  -2  269.51   12.30
   1  -6  -2  279.34   13.11
   1  -6  -1    3.27    1.00
  -1  -6   1    2.25    1.02
   1   6  -1    3.84    2.64
  -1  -6   1    7.21    1.58
   1  -6  -1    5.15    1.53
   1  -6  -1    1.92    1.93
  -1  -6   1    1.28    2.00
   1  -6  -1    4.06    1.27
   1  -6  -1    5.66    1.58
  -1  -6   1    4.05    1.57
   1  -6  -1    3.32    1.06
  -1  -6   0  112.50    6.92
   1  -6   0   83.34    5.33
   1  -6   0   96.47    5.80
   1  -6   0  103.70    6.51
  -1  -6   0  102.00    6.39
  -1   6   0  105.82   11.46
   1   6   0  126.38   12.91
  -1  -6   0   91.00   11.66
  -1  -6   0  117.75    7.16
  -1  -6   0  105.30    6.87
   1  -6   0  111.52    6.63
   1  -6   0   99.01    8.98
  -1  -6   0  108.33    6.76
   1  -6   0   95.98    5.95
  -1  -6  -1  303.40   14.24
   1  -6   1  254.95   12.23
  -1   6  -1  311.61   19.77
   1   6   1  295.83   21.88
  -1  -6  -1  285.47   21.88
   1  -6   1  306.25   15.53
  -1  -6  -1  321.14   14.16
  -1  -6  -1  305.84   14.25
   1  -6   1  275.42   12.83
  -1  -6  -1  291.95   13.70
  -1  -6  -2  390.52   17.58
  -1   6  -2  371.66   20.86
   1  -6   2  352.53   15.44
   1   6   2  390.12   26.01
   1  -6   2  361.08   18.56
  -1  -6  -2  413.79   17.36
  -1  -6  -2  381.96   26.22
  -1  -6  -2  372.11   17.24
   1  -6   2  343.31   15.65
  -1  -6  -2  371.79   16.82
  -1   6  -3  321.30   19.75
  -1  -6  -3  287.51   14.79
   1  -6   3  289.10   13.22
   1   6   3  316.04   22.92
   1  -6   3  257.05   15.81
  -1  -6  -3  319.18   23.61
  -1  -6  -3  344.47   15.25
  -1  -6  -3  309.86   15.34
   1  -6   3  273.67   13.20
  -1  -6  -3  276.34   14.35
  -1   6  -4  104.17   11.48
  -1  -6  -4  131.90    9.57
  -1  -6  -4  102.87    8.09
  -1   6  -4  155.35   13.26
   1  -6   4  131.20    7.54
   1   6   4  179.26   16.48
   1  -6   4  105.56    9.37
  -1  -6  -4  149.58   15.79
   1  -6   4  134.34    7.69
  -1  -6  -4  122.85    9.25
  -1  -6  -4  112.51    8.50
   1  -6   5  149.26    8.47
  -1   6  -5  158.82   14.34
  -1  -6  -5  155.52   11.68
  -1   6  -5  131.45   13.56
   1  -6   5  114.16   10.31
  -1   6  -6 1250.44   50.77
  -1  -6  -6  941.37   39.04
  -1  -6  -6  936.32   44.29
  -1   6  -6 1036.98   36.48
  -1   6  -6 1031.98   36.52
   1  -6   6  811.08   40.76
  -1   6  -6  737.79   45.33
  -1   6  -7  403.39   17.30
  -1  -6  -7  371.68   18.79
  -1   6  -7  407.93   26.30
  -1  -6  -7  409.98   22.71
   1  -6   7  402.73   17.98
  -1  -6  -7  321.97   23.94
   1   6   7  415.01   28.31
   1  -6   7  365.95   20.82
  -1   6  -8   53.38    4.69
  -1  -6  -8   61.13    6.13
  -1   6  -8   57.73    9.07
  -1  -6  -8   55.47    9.49
  -1  -6  -8   59.70    7.46
   1  -6   8   62.67    5.77
   1   6   8   70.12   10.84
  -1   6  -8   45.10    9.08
  -1   6  -9    0.82    1.98
   1   6   9    3.67    2.89
  -1  -6  -9    6.14    2.14
  -1   6  -9    4.09    2.70
  -1   6  -9    5.20    1.57
  -1  -6  -9    6.12    2.77
  -1   6  -9    4.23    1.67
  -1  -6  -9    4.71    3.51
  -1  -6 -10  155.21    9.90
  -1   6 -10  171.03   14.63
   1  -6  10  156.85   10.15
  -1   6 -10  157.26    8.40
  -1  -6 -10  210.36   15.92
  -1  -6 -10  186.65   12.41
  -1   6 -10  146.74    8.60
   1   6  10  147.68   15.19
  -1   6 -10  109.58   14.74
  -1   6 -11   99.14    6.01
   1  -6  11   98.42    7.43
  -1  -6 -11  139.35   11.19
  -1  -6 -11  130.02    9.26
  -1  -6 -11  106.22    7.12
  -1   6 -11  101.60    6.33
   1  -6  11  136.20    9.95
  -1   6 -12   23.61    2.52
   1  -6  12   26.13    4.04
   1  -6  12   24.96    3.27
  -1  -6 -12   28.96    4.29
  -1  -6 -12   27.41    3.81
  -1  -6 -13   97.93    7.39
  -1  -6 -13   85.03    6.28
   1  -6  13   69.26    5.06
  -1  -6 -13   88.16    6.06
   1   6  13   72.66    5.39
  -1   6 -13   67.60    4.19
   1   6  13   72.68    4.77
   1  -6  13   91.20    6.42
   1  -6  14    2.40    0.91
   1  -6  14    2.42    1.08
  -1  -6 -14    1.68    0.90
  -1  -6 -14    0.91    0.99
  -1  -6 -15   16.56    1.70
  -1  -7  14  128.87    6.65
   1  -7 -14  121.04    6.56
  -1  -7  13   73.28    4.81
   1   7 -13   63.18    3.90
  -1  -7  12    1.71    1.91
   1  -7 -12    0.76    1.06
   1   7 -12    0.87    0.66
  -1  -7  12    0.63    1.11
   1   7 -12    1.45    0.84
   1  -7 -12    0.27    1.57
  -1  -7  11   52.19    5.12
   1   7 -11   47.64    3.76
   1  -7 -11   51.60    5.70
   1  -7 -11   65.57    6.89
   1   7 -11   50.02    4.00
   1  -7 -11   42.91    5.88
  -1  -7  11   65.62    7.63
   1  -7 -10  122.70    7.74
   1   7 -10  102.82    6.43
   1  -7 -10  129.95   11.56
   1  -7 -10  102.99    9.25
   1   7 -10  103.38    6.71
  -1  -7  10  101.28   10.79
   1  -7 -10   87.34    9.09
   1  -7  -9  157.34   13.14
   1   7  -9  202.40   17.03
   1  -7  -9  233.22   11.99
   1   7  -9  200.84   10.34
  -1  -7   9  205.82   11.12
   1  -7  -9  243.51   18.48
   1  -7  -9  180.15   13.75
   1   7  -9  194.14    9.53
   1   7  -9  181.87    9.33
   1   7  -9  187.87   10.51
  -1   7   9  195.19   18.95
  -1  -7   9  164.98   15.07
   1  -7  -8    4.30    1.61
   1   7  -8    1.29    2.20
   1   7  -8    1.24    1.16
   1   7  -8    1.18    1.07
   1   7  -8    2.61    1.03
   1   7  -8    2.79    1.18
  -1  -7   8    5.47    1.78
   1  -7  -8    3.16    1.35
   1  -7  -8    1.34    3.24
   1  -7  -8    1.64    1.72
   1  -7  -8    0.40    1.48
  -1  -7   8    2.19    2.16
   1   7  -7   74.25   10.46
  -1  -7   7   60.12    5.16
   1  -7  -7   54.06    5.36
   1  -7  -7   66.01    9.44
  -1  -7   7   59.21    5.05
   1  -7  -7   38.47    4.49
   1  -7  -7   32.59    5.47
   1   7  -7   59.35    4.82
   1   7  -7   60.07    4.78
   1   7  -7   62.06    4.67
   1  -7  -7   36.92    5.99
  -1  -7   7   25.10    5.67
   1   7  -6   13.96    4.64
  -1  -7   6   13.34    2.47
   1  -7  -6   10.14    2.43
   1   7  -6   12.23    2.08
  -1  -7   6   11.51    2.30
   1  -7  -6    6.04    1.78
   1   7  -6   10.99    2.15
   1   7  -6   10.29    2.03
   1  -7  -6    8.42    2.95
  -1  -7   6    6.60    2.89
   1  -7  -6    7.93    2.56
  -1  -7   5  671.48   26.39
   1   7  -5  774.20   37.79
   1   7  -5  721.76   25.61
   1   7  -5  671.10   25.01
   1  -7  -5  601.31   28.94
   1  -7  -5  748.79   27.73
  -1  -7   5  412.77   27.68
   1  -7  -5  614.47   28.01
   1  -7  -5  555.03   25.60
  -1  -7   4   23.54    3.10
   1   7  -4   27.47    6.11
  -1  -7   4   14.59    3.37
   1  -7  -4   22.37    3.30
   1  -7  -4   20.49    3.67
   1  -7  -4   26.67    3.76
   1  -7  -4   20.16    2.92
   1  -7  -3   55.70    5.79
   1   7  -3   60.11    8.79
   1  -7  -3   65.26    5.76
  -1  -7   3   57.92    4.99
   1   7  -3   62.74    4.55
  -1   7   3   50.12    9.22
   1  -7  -3   68.11    5.57
  -1  -7   3   57.52    6.40
   1  -7  -3   71.83    5.93
   1  -7  -3   76.14    6.14
   1  -7  -3   46.13    4.02
  -1  -7   3   62.00    5.16
   1   7  -2    8.30    3.46
  -1  -7   2    7.88    1.83
   1  -7  -2    8.58    2.16
  -1  -7   2   14.59    2.28
  -1  -7   2    8.94    1.97
  -1   7   2    7.17    3.61
   1  -7  -2    9.90    2.22
  -1  -7   2    8.82    3.63
   1  -7  -2    8.11    1.96
   1  -7  -2    9.16    2.28
   1  -7  -2    7.70    1.64
  -1  -7   2    8.61    1.92
   1  -7  -1  502.84   20.58
   1   7  -1  548.49   31.66
  -1  -7   1  491.48   21.15
  -1  -7   1  540.22   21.90
   1  -7  -1  576.95   22.81
  -1  -7   1  524.42   21.80
  -1   7   1  485.53   30.88
  -1  -7   1  509.45   22.66
  -1  -7   1  413.61   29.30
   1  -7  -1  561.83   22.93
   1  -7  -1  462.34   20.64
  -1  -7   0  173.90    9.87
   1   7   0  196.97   17.82
  -1  -7   0  194.87   10.57
  -1   7   0  187.53   16.72
  -1  -7   0  190.68   10.83
   1  -7   0  173.80   10.53
   1  -7   0  164.61    9.29
  -1  -7  -1   28.04    3.42
   1   7   1   27.81    7.07
  -1   7  -1   27.87    5.93
   1  -7   1   18.40    2.46
  -1  -7  -1   28.50    3.76
  -1  -7  -1   28.51    3.69
  -1  -7  -1   25.50    6.49
  -1  -7  -1   31.14    3.93
   1  -7   1   25.41    3.10
  -1  -7  -2    5.90    1.70
   1   7   2    7.75    4.19
  -1  -7  -2    9.07    2.32
   1  -7   2    8.06    1.74
  -1  -7  -2   10.19    4.76
  -1  -7  -2    8.57    1.88
  -1  -7  -2   12.58    2.67
  -1  -7  -2   12.18    2.60
  -1  -7  -2   11.02    2.32
   1  -7   2    7.91    1.83
  -1   7  -3  153.23   13.79
  -1  -7  -3  114.12    8.69
  -1  -7  -3  110.90    7.77
   1  -7   3  123.40    7.45
   1   7   3  126.02   14.92
  -1  -7  -3  126.82   15.36
  -1  -7  -3  135.37    9.09
   1  -7   3  112.91    9.82
  -1  -7  -3  117.68    8.86
   1  -7   3  112.85    7.37
  -1  -7  -3  112.50    8.37
  -1  -7  -4  237.21   13.84
  -1   7  -4  296.41   20.66
   1   7   4  290.84   23.40
   1  -7   4  200.18   14.82
  -1  -7  -4  267.57   15.46
  -1  -7  -4  239.88   14.07
   1  -7   4  254.27   12.55
   1   7   5   31.30    7.72
  -1   7  -5   28.05    6.23
   1  -7   5   20.55    2.94
  -1  -7  -5   19.09    3.74
  -1  -7  -5   19.93    4.13
   1  -7   5   17.45    4.00
  -1  -7  -5   20.75    4.41
  -1  -7  -6   83.46    7.39
  -1   7  -6  111.74   12.59
  -1  -7  -6   96.56   10.41
   1  -7   6   88.48    6.64
  -1  -7  -6   81.43    8.58
  -1   7  -6   92.34    5.82
   1  -7   6   56.83    7.54
  -1  -7  -6   63.00    8.30
  -1  -7  -7   44.80    7.65
  -1   7  -7   96.83    6.28
  -1  -7  -7   85.97    7.50
  -1   7  -7   90.72   11.47
  -1  -7  -7   82.62   10.80
   1  -7   7  104.04    7.36
  -1  -7  -7   61.89    8.27
   1   7   7   98.55   13.48
   1  -7   7   88.00    9.12
  -1  -7  -8    3.24    2.72
   1   7   8    7.13    3.83
  -1  -7  -8    7.62    2.41
  -1   7  -8    8.82    3.58
  -1   7  -8    7.87    1.71
  -1  -7  -8    6.08    2.85
   1  -7   8   10.95    2.51
  -1   7  -8    6.25    1.78
   1  -7   8    7.49    2.91
  -1  -7  -8    4.64    3.58
  -1  -7  -9  156.27    9.73
  -1   7  -9  122.97    7.00
  -1   7  -9  127.89    7.59
  -1  -7  -9   91.01   10.77
   1  -7   9  151.44   11.49
   1  -7   9  142.03    9.00
  -1  -7  -9  111.16   10.67
  -1  -7  -9  158.71   14.41
  -1   7 -10   84.00    5.53
   1  -7  10   97.16    7.00
  -1  -7 -10   93.54    8.35
  -1  -7 -10  110.27   10.24
  -1  -7 -10  101.89    7.05
  -1  -7 -10   77.08    8.75
   1  -7  11    2.11    1.19
  -1  -7 -11    1.13    1.24
  -1   7 -11    0.85    0.71
  -1  -7 -11    0.31    1.54
   1   7  12    5.61    1.51
  -1   7 -12    4.28    0.92
   1   7  12    5.85    1.43
   1  -7  12    5.53    1.42
  -1  -7 -12    4.58    1.58
   1   7  13  143.30    7.34
   1  -7  13  169.71    8.33
   1   8 -11   41.15    3.04
  -1   8  11   34.57    3.21
   1   8 -11   40.39    2.82
   1   8 -10    2.96    0.99
  -1  -8  10    1.30    2.70
   1  -8 -10    1.88    1.33
   1   8 -10    2.12    0.95
   1   8  -9   10.70    1.84
   1   8  -9    9.57    1.88
  -1  -8   9    5.26    3.21
   1  -8  -9   10.79    2.71
   1   8  -8   35.54    3.18
   1   8  -8   35.77    3.15
   1  -8  -8   26.21    4.39
  -1  -8   8   42.07    4.17
   1   8  -8   36.80    3.57
   1   8  -7  424.07   26.29
   1  -8  -7  429.34   18.22
   1   8  -7  407.28   16.46
   1   8  -7  371.70   15.37
   1   8  -7  370.82   15.50
  -1  -8   7  391.28   16.65
  -1   8   7  346.87   26.02
   1  -8  -6  119.05    8.37
   1   8  -6  150.78   14.95
   1   8  -6  116.57    7.01
   1   8  -6  108.88    6.63
   1   8  -6  118.03    7.17
  -1   8   6  103.77   13.53
   1  -8  -6   84.72    8.03
  -1  -8   6   55.37    8.12
  -1  -8   5  149.34    9.04
  -1  -8   5  119.52    8.22
   1   8  -5  139.85    8.05
  -1   8   5  128.23   15.11
   1  -8  -5  123.59    9.46
   1   8  -4   23.40    2.92
   1   8  -4   20.56    2.72
  -1  -8   4   20.09    3.12
   1   8  -4   26.77    6.52
  -1   8   4   15.97    5.44
   1  -8  -4   18.10    3.23
   1  -8  -4   20.49    3.45
   1  -8  -4   20.99    3.34
  -1  -8   4   21.56    3.23
   1  -8  -3  316.22   16.05
   1   8  -3  357.07   24.30
  -1  -8   3  286.93   14.45
  -1   8   3  227.27   20.99
   1   8  -3  297.27   13.52
  -1  -8   3  232.99   14.77
   1  -8  -3  320.04   15.38
   1  -8  -3  351.29   16.73
  -1  -8   3  303.70   15.02
  -1  -8   2  108.78    7.33
   1   8  -2  131.16   13.83
  -1   8   2   96.19   12.64
   1   8  -2  102.56    6.71
  -1  -8   2  118.05    7.97
   1  -8  -2   92.13    6.29
   1  -8  -2  116.28    8.06
   1  -8  -2  129.33    8.84
  -1  -8   2  100.20    8.10
  -1  -8   1   92.93    6.92
   1  -8  -1   73.12    5.57
  -1  -8   1   79.24    5.93
  -1   8   1   65.32   10.00
   1   8  -1   94.53   11.75
   1  -8  -1   77.61    6.58
  -1  -8   1   91.25    7.44
   1  -8  -1   83.94    7.04
  -1  -8   0   60.67    5.57
   1  -8   0   59.71    5.02
   1   8   0   71.16   10.69
  -1  -8   0   46.40    4.44
  -1  -8   0   71.41    5.89
  -1   8   0   63.26    9.26
  -1  -8   0   74.27    6.30
  -1  -8   0   72.85    6.58
   1  -8   0   64.78    6.16
  -1  -8  -1  121.81    8.37
   1  -8   1  130.58    8.28
   1   8   1  127.03   15.05
  -1  -8  -1  158.25   10.15
  -1  -8  -1  135.60    8.75
  -1  -8  -1  150.60    9.99
  -1  -8  -1  136.38    8.51
  -1  -8  -2    7.12    1.91
   1  -8   2    7.69    1.94
  -1  -8  -2    6.94    2.16
  -1   8  -2   12.70    4.69
   1   8   2   14.76    5.20
  -1  -8  -2    9.36    2.08
  -1  -8  -2   11.34    2.76
  -1  -8  -2   12.12    2.94
  -1  -8  -2   11.60    2.28
  -1  -8  -3  124.90    8.20
   1  -8   3  151.24    9.05
  -1  -8  -3  130.33    8.60
  -1  -8  -3  159.19   10.65
   1   8   3  157.59   16.72
  -1   8  -3  186.78   16.53
  -1  -8  -3  181.00   11.74
  -1  -8  -4    8.76    1.82
  -1  -8  -4    5.33    2.00
   1  -8   4    8.12    2.20
  -1  -8  -4    4.85    1.54
  -1   8  -4   11.62    4.32
  -1  -8  -4    6.90    2.41
   1   8   4    3.17    3.13
  -1  -8  -4    8.07    2.90
  -1  -8  -5   19.31    3.71
   1  -8   5   26.98    3.51
  -1  -8  -5   22.71    4.67
  -1   8  -5   30.20    6.67
  -1  -8  -5   19.36    3.56
   1   8   5   17.36    5.75
   1  -8   6   88.38    6.56
  -1  -8  -6   68.59    7.34
  -1  -8  -6   87.16    9.87
  -1   8  -6   83.68    5.74
   1   8   6   68.57    5.60
  -1   8  -6  103.09   12.01
   1   8   6  105.70   13.33
   1   8   7   87.52    6.20
  -1   8  -7   88.81    5.60
  -1  -8  -7   59.46    7.02
  -1  -8  -7   80.44   10.05
   1  -8   7   76.11    8.65
   1   8   8   18.24    2.62
  -1   8  -8   12.47    1.84
  -1   8  -8   14.04    2.21
  -1  -8  -8   13.45    4.30
   1  -8   8   18.02    4.20
  -1  -8  -8   17.43    3.17
  -1  -8  -9  121.84   10.50
   1   8   9   93.43    6.57
  -1   8  -9  112.46    6.25
  -1  -8  -9  139.16    8.43
   1  -8   9  143.52   10.64
  -1   8 -10   23.62    2.20
   1   8  10   26.17    3.04
   1   8  10   21.12    2.59
  -1  -8 -10   29.08    4.17
  -1  -8 -11  214.69   10.45
   1   8  11  178.97    8.71
  -1  -9  11   29.90    2.42
  -1   9  10    7.34    1.37
  -1  -9  10   12.98    2.32
   1   9  -9   90.90    5.08
  -1  -9   9   84.73    7.35
   1   9  -8   57.82    4.23
   1   9  -8   56.25    3.87
   1   9  -7    9.16    1.50
  -1  -9   7    5.75    2.25
   1   9  -7    9.72    1.76
   1   9  -6   17.18    2.24
   1   9  -6   16.72    2.35
  -1  -9   6   21.51    3.07
  -1  -9   6   11.71    2.89
   1   9  -6   17.56    2.49
   1   9  -5   37.20    3.38
   1   9  -5   45.55    4.06
   1   9  -5   35.63    3.50
  -1  -9   5   44.46    4.48
   1   9  -4   11.73    2.08
  -1  -9   4    8.67    2.10
  -1  -9   4    4.40    1.86
   1   9  -3    7.32    1.62
  -1  -9   3    2.81    1.48
   1  -9  -3    8.42    2.24
  -1  -9   3    7.76    2.15
  -1  -9   2    1.69    1.18
   1   9  -2    4.13    1.33
   1   9  -2    3.28    2.42
  -1  -9   2    2.31    1.52
   1  -9  -2    3.07    1.56
   1   9  -1   22.76    5.67
   1   9  -1   18.87    2.55
   1  -9  -1   24.08    3.81
  -1  -9   1   16.59    2.82
  -1  -9   1   19.19    3.47
   1  -9  -1   23.19    3.49
  -1  -9   1   18.39    3.03
  -1   9   0    2.39    2.04
   1   9   0    1.81    1.88
  -1  -9   0    5.57    1.74
   1  -9   0    1.56    1.45
   1  -9   0    3.47    1.65
  -1  -9   0    5.59    2.03
  -1  -9   0    2.76    1.48
   1  -9   0    2.35    1.12
   1   9   1   84.16    5.84
  -1  -9  -1   88.18    6.68
   1  -9   1  106.94    7.01
  -1   9  -1  121.40   13.18
  -1  -9  -1  133.93    9.49
   1  -9   1   84.35    7.28
  -1  -9  -1  111.64    7.23
   1  -9   2   33.78    3.89
  -1  -9  -2   32.19    3.53
   1   9   2   25.88    2.92
   1  -9   3   49.03    4.75
  -1  -9  -3   44.85    5.34
   1  -9   4   50.48    4.93
   1   9   4   35.44    3.71
  -1  -9  -4   38.74    4.99
   1   9   5  138.63    8.31
  -1  -9  -5  152.83   10.32
  -1   9  -5  151.36    8.07
   1  -9   6   -0.36    1.50
  -1  -9  -6   -0.45    1.78
   1   9   6    0.62    0.89
   1  -9   7    1.95    1.89
  -1  -9  -7    6.57    2.69
  -1   9  -7    6.56    1.51
   1   9   7    7.68    1.71
  -1   9  -8   12.38    1.66
  -1  -9  -8   16.04    3.66
   1  -9   8    7.43    2.95
   1   9   8   11.22    1.89
   1  -9   9  269.78   15.10
   1   9   9  255.80   11.33
   1  -9  10   13.60    2.30
  -1 -10   8    2.45    1.55
  -1 -10   8    2.34    1.46
  -1 -10   7   61.42    6.31
  -1 -10   7   59.28    6.52
   1  10  -6  123.19    6.24
  -1 -10   6  121.49    9.40
   1  10  -5   21.79    2.18
   1  10  -5   22.45    2.33
  -1 -10   5   18.05    3.53
  -1 -10   5   13.28    2.74
  -1 -10   4    3.00    1.55
  -1 -10   4    0.92    0.93
  -1 -10   4    1.28    1.29
   1  10  -4    0.63    0.85
  -1 -10   3   40.90    4.91
  -1 -10   3   35.58    3.91
   1  10  -3   48.87    3.52
   1  10  -3   54.03    3.81
  -1 -10   2  148.63   10.02
   1  10  -2  159.11    7.77
  -1 -10   1    6.17    1.68
  -1 -10   1    4.72    1.34
   1 -10  -1    4.64    1.70
   1  10  -1    6.00    1.24
   1  10   0    6.30    1.37
   1  10   0    7.37    1.35
   1 -10   0    9.76    2.24
   1  10   1   23.40    2.50
   1  10   1   21.28    2.27
   1 -10   1   22.30    3.35
   1  10   2   31.27    2.89
   1 -10   2   34.90    4.30
   1  10   3    6.26    1.37
   1 -10   3    4.84    1.89
   1  10   4   28.70    2.53
   1 -10   4   26.74    4.18
   1  10   5    7.85    1.36
   1 -10   5    6.81    2.38
   1 -10   6    6.86    2.90
   1 -10   6    7.03    2.46
   1 -10   7   59.07    6.67
   1 -10   7   62.89    6.04
   1 -10   8   23.39    3.20
   1 -10   8   17.85    2.57
  -2   0  17   -0.28    1.01
   2   0 -16    8.57    2.62
  -2   0  16   10.13    2.27
   2   0 -16    6.16    1.67
   2   0 -15    0.72    2.14
   2   0 -15    0.95    1.45
  -2   0  15   -0.24    1.64
   2   0 -14  229.98   25.66
  -2   0  14  238.94   14.12
  -2   0  14  246.12   21.74
   2   0 -14  256.80   16.66
   2   0 -14  236.06   12.25
   2   0 -14  284.27   13.88
  -2   0  14  250.50   12.71
   2   0 -13   -1.23    4.54
  -2   0  13    4.05    1.76
  -2   0  13    0.80    2.73
   2   0 -13    2.33    1.38
   2   0 -13    1.60    1.93
   2   0 -13    0.73    2.27
   2   0 -13    1.15    1.13
   2   0 -13    1.09    1.49
   2   0 -13    0.71    2.42
   2   0 -12  420.55   18.29
  -2   0  12  366.33   26.61
   2   0 -12  352.93   17.60
   2   0 -12  333.32   25.14
   2   0 -12  340.87   20.41
   2   0 -12  392.73   17.80
   2   0 -12  406.86   18.24
  -2   0  12  360.16   18.62
   2   0 -12  459.25   27.93
  -2   0  11    1.36    1.18
   2   0 -11    1.89    1.37
  -2   0  11   -1.32    2.05
   2   0 -11    0.64    1.55
   2   0 -11    0.63    1.75
   2   0 -11    2.32    1.40
   2   0 -11    0.37    0.94
   2   0 -11    0.38    1.11
  -2   0  10  729.57   38.38
   2   0 -10  757.37   30.16
   2   0 -10  821.87   30.32
   2   0 -10  695.84   32.07
   2   0 -10  632.17   36.46
   2   0 -10  851.47   30.51
  -2   0  10  704.52   29.43
  -2   0  10  758.18   30.69
   2   0 -10  940.97   41.11
  -2   0   9    2.26    1.05
   2   0  -9    3.41    1.43
  -2   0   9    0.96    2.01
   2   0  -9    2.80    1.95
   2   0  -9    1.17    1.01
   2   0  -9    0.92    1.05
   2   0  -9    1.93    1.14
   2   0  -9    0.49    1.79
   2   0  -8  715.97   26.91
   2   0  -8  691.27   33.19
   2   0  -8  767.95   27.56
   2   0  -8  697.40   27.28
  -2   0   8  676.47   26.62
   2   0  -7    0.23    0.69
   2   0  -7    3.28    1.65
   2   0  -6  945.61   39.21
  -2   0   6  971.08   39.35
   2   0  -5    1.35    1.26
  -2   0   5    1.58    1.26
   2   0  -4 3457.87  123.70
  -2   0   4 3678.61  123.99
   2   0  -3    0.15    0.80
   2   0  -3    0.43    1.15
   2   0  -3    2.61    0.98
   2   0  -2   67.97    4.80
   2   0  -2   63.03    5.03
   2   0  -1    1.26    0.67
   2   0  -1    0.65    0.64
  -2   0   1    0.34    0.47
   2   0   0  462.76   18.04
  -2   0  -1    0.21    0.36
  -2   0  -1    0.27    0.47
   2   0   2  481.98   17.94
  -2   0  -2  512.62   20.04
  -2   0  -3    0.25    0.85
  -2   0  -3    0.82    0.88
   2   0   3    1.43    0.59
  -2   0  -3    0.76    0.95
   2   0   3    1.32    1.23
  -2   0  -4 3031.42  109.86
  -2   0  -4 3172.01  107.32
   2   0   4 2888.49  108.57
  -2   0  -5    2.28    1.67
  -2   0  -5    0.24    1.02
   2   0   5    2.94    1.82
   2   0   6   45.04    3.87
  -2   0  -6   40.99    5.20
   2   0   6   44.60    6.26
   2   0   7    0.48    0.83
  -2   0  -7    1.11    0.72
   2   0   7    0.94    1.60
  -2   0  -7    0.11    0.60
  -2   0  -7    0.34    1.07
   2   0   7    1.83    0.74
   2   0   8 1346.74   57.68
  -2   0  -8 1255.76   46.36
  -2   0  -8 1254.28   46.21
   2   0   8 1284.64   48.02
   2   0   8 1285.96   47.30
  -2   0  -8 1428.05   54.56
  -2   0  -9    3.26    1.72
   2   0   9    2.78    1.52
   2   0   9    4.41    2.77
  -2   0  -9    0.91    1.06
   2   0   9    7.05    1.90
  -2   0  -9    1.94    1.25
  -2   0  -9    0.48    1.88
   2   0  10  280.36   14.98
   2   0  10  285.44   22.18
   2   0  10  280.75   14.09
  -2   0 -10  282.88   13.59
  -2   0 -10  319.05   20.90
  -2   0 -10  273.77   21.86
  -2   0 -10  264.87   15.04
  -2   0 -10  274.42   16.22
  -2   0 -11    7.32    3.67
  -2   0 -11   -0.34    1.63
  -2   0 -11    2.20    1.72
   2   0  11   -1.53    2.60
   2   0  11    0.26    1.60
   2   0  11    1.83    1.47
  -2   0 -11    1.13    1.17
  -2   0 -11   -0.60    2.05
   2   0  12  420.60   20.04
   2   0  12  410.22   18.55
   2   0  12  369.30   27.84
  -2   0 -12  421.44   18.52
  -2   0 -12  338.53   26.25
  -2   0 -12  397.25   20.16
  -2   0 -12  379.92   21.19
   2   0  13    2.83    1.52
  -2   0 -13    1.10    1.15
  -2   0 -13    1.02    1.57
  -2   0 -13    2.81    2.59
   2   0  13    2.01    1.30
   2   0  14   84.78    6.90
  -2   0 -14   83.65    7.78
   2   0  14   74.85    5.49
   2   0  15    1.33    1.27
  -2   0 -15   -0.75    1.68
   2   0  16  193.13    9.82
  -2   0 -16  194.27   10.77
  -2   0 -17    0.11    0.74
  -2   1  17  114.03    6.76
  -2  -1  17  119.23    6.88
   2  -1 -17  116.21    6.19
  -2   1  16  155.27    9.24
  -2  -1  16  161.30    9.38
   2   1 -16  152.93    8.45
   2   1 -16  174.34   11.10
  -2  -1  16  150.56    7.92
  -2  -1  15  206.60   12.31
  -2   1  15  215.59   12.53
  -2  -1  15  233.80   11.67
   2  -1 -15  220.90   12.00
   2   1 -15  239.12   11.84
   2   1 -15  235.32   15.10
   2   1 -14    1.21    5.33
   2  -1 -14    1.21    5.60
  -2   1  14    4.95    2.03
  -2  -1  14    5.41    2.04
  -2   1  14    3.91    3.78
  -2  -1  14    1.55    3.74
   2   1 -14    5.78    1.86
   2   1 -14    2.36    2.69
   2  -1 -14    5.13    2.81
   2   1 -14    5.50    2.80
   2   1 -14    7.95    1.82
   2  -1 -14    7.13    2.29
   2   1 -14    5.16    1.85
   2   1 -14    6.29    3.28
   2  -1 -13    1.22    4.78
   2   1 -13    7.34    6.14
  -2   1  13    4.50    1.88
  -2   1  13    1.57    2.90
  -2  -1  13    2.33    2.87
   2   1 -13    3.66    1.59
   2   1 -13    0.82    3.23
   2   1 -13    5.15    2.34
   2  -1 -13   10.24    3.06
   2   1 -13    2.30    1.44
   2   1 -13    1.74    1.16
   2  -1 -13    2.26    1.37
   2   1 -13    2.89    1.59
   2  -1 -13    6.30    2.24
   2   1 -13    7.02    3.77
  -2   1  12  328.22   16.85
  -2  -1  12  277.51   16.03
  -2   1  12  359.90   25.55
   2   1 -12  305.52   15.28
   2   1 -12  345.71   15.85
  -2  -1  12  317.71   24.33
   2  -1 -12  278.05   21.40
   2  -1 -12  297.50   18.39
   2   1 -12  309.82   18.79
   2   1 -12  319.38   25.10
   2  -1 -12  347.50   16.45
   2   1 -12  340.39   15.66
   2   1 -12  331.43   15.36
   2  -1 -12  384.84   17.43
   2   1 -12  387.87   24.29
  -2   1  11   19.48    3.11
  -2  -1  11   13.56    2.58
  -2  -1  11   16.87    2.87
   2   1 -11   16.34    2.69
   2  -1 -11   19.38    3.14
  -2   1  11   16.93    5.16
  -2  -1  11   12.91    4.34
   2   1 -11   14.43    2.55
   2  -1 -11   16.51    3.02
   2  -1 -11   13.51    4.23
   2   1 -11   19.51    3.91
   2   1 -11   13.62    4.92
   2  -1 -11   14.67    3.51
   2   1 -11   20.13    2.93
   2  -1 -11   21.60    3.26
   2  -1 -11   20.94    3.30
   2  -1 -11   14.27    5.26
   2   1 -11   18.70    4.93
   2   1 -10  373.20   16.49
   2   1 -10  356.25   16.35
  -2  -1  10  350.09   23.43
   2  -1 -10  363.12   17.28
   2  -1 -10  416.00   18.01
  -2   1  10  352.50   23.45
   2   1 -10  337.91   18.62
   2   1 -10  330.12   23.89
   2  -1 -10  339.09   18.51
   2  -1 -10  336.47   21.73
   2  -1 -10  387.84   17.54
   2  -1 -10  463.12   18.84
   2   1 -10  355.05   15.61
   2   1 -10  401.19   16.65
  -2   1  10  369.16   17.29
  -2  -1  10  362.73   17.17
  -2  -1  10  349.19   16.61
   2  -1 -10  490.08   29.46
   2   1 -10  450.01   24.60
   2  -1  -9   19.62    2.92
   2   1  -9   19.11    2.55
  -2   1   9   15.25    3.97
   2   1  -9   18.49    2.49
  -2  -1   9   15.65    4.11
   2  -1  -9   20.21    2.87
   2  -1  -9   11.13    3.33
   2   1  -9   18.82    4.89
   2   1  -9   19.75    2.55
   2  -1  -9   16.35    2.71
   2   1  -9   18.13    2.29
  -2  -1   9   19.11    2.57
   2   1  -9   20.66    4.52
   2  -1  -8  973.36   37.65
   2   1  -8 1009.62   37.03
   2   1  -8 1027.49   37.11
  -2   1   8 1068.22   44.65
  -2  -1   8  913.86   43.11
   2   1  -8  977.41   44.99
   2  -1  -8  882.90   41.32
   2   1  -8 1075.10   37.26
   2   1  -8 1002.45   36.52
   2  -1  -8 1039.00   38.19
  -2  -1   8  960.47   37.04
   2   1  -8 1195.93   45.29
   2  -1  -7   26.41    2.76
   2   1  -7   29.28    2.74
   2   1  -7   32.02    5.21
   2  -1  -7   25.70    4.06
  -2  -1   7   31.92    2.87
   2  -1  -7   29.58    3.03
   2   1  -7   27.14    2.68
   2   1  -7   32.85    2.93
  -2  -1   6  624.18   27.81
  -2   1   6  668.96   28.39
   2  -1  -6  608.82   26.66
   2   1  -6  620.49   28.89
   2  -1  -5   65.45    5.20
   2   1  -5   43.71    4.45
  -2  -1   5   54.90    5.28
  -2   1   5   55.74    5.39
   2  -1  -4 2107.68   70.70
   2  -1  -4 1651.64   75.90
   2   1  -4 1734.45   70.63
  -2  -1   4 2183.89   72.11
  -2   1   4 2254.92   72.39
   2   1  -3   49.43    4.94
   2  -1  -3   60.31    5.83
   2   1  -3   86.19    6.32
   2  -1  -3   79.11    6.11
   2  -1  -3   64.53    4.26
   2  -1  -2 1295.95   42.39
   2   1  -2 1293.49   42.50
   2  -1  -1   47.70    3.44
   2   1  -1   49.92    3.48
   2   1  -1   45.87    3.72
   2  -1  -1   46.64    3.74
  -2   1   1   40.98    2.43
   2   1   0  373.55   15.34
   2  -1   0  402.03   15.62
  -2   1  -1    8.68    1.21
  -2  -1  -1    9.08    1.76
  -2   1  -2 1069.02   40.53
  -2  -1  -2 1197.91   42.95
  -2  -1  -3  180.42   11.13
  -2   1  -3  187.44   11.25
   2   1   3  179.92   10.74
   2  -1   3  172.63   10.51
  -2  -1  -3  197.98   11.37
  -2   1  -4  166.59   11.39
  -2  -1  -4  162.29   11.34
  -2   1  -4  125.65    8.84
  -2  -1  -4  164.20   11.36
   2  -1   4  164.75   10.82
   2   1   4  173.96   11.14
  -2  -1  -4  175.51   11.52
  -2   1  -5  253.49   13.85
  -2  -1  -5  271.18   16.73
  -2  -1  -5  266.56   16.77
  -2   1  -5  293.38   17.39
   2  -1   5  251.60   15.51
   2   1   5  241.63   15.44
   2   1   6  839.29   31.68
   2  -1   6  824.28   31.53
   2   1   6  928.40   38.81
   2  -1   6  773.23   37.17
  -2  -1  -6  782.14   31.17
  -2   1  -6  922.75   35.59
  -2  -1  -6  898.04   39.24
   2  -1   7  206.98   10.47
   2   1   7  201.97   10.38
   2   1   7  204.95   15.36
  -2   1  -7  177.56    8.78
   2   1   7  187.33    9.57
  -2   1  -7  194.59    8.97
  -2  -1  -7  189.86    9.82
  -2  -1  -7  212.14   15.59
  -2   1  -7  226.37   13.44
   2   1   8  179.87   10.11
   2  -1   8  162.35    9.81
   2  -1   8  154.28   14.34
   2   1   8  171.63   14.99
  -2   1  -8  162.60    8.53
   2   1   8  196.97    9.69
  -2   1  -8  167.59    8.52
  -2  -1  -8  180.79    9.62
  -2  -1  -8  185.02   14.88
  -2   1  -8  221.01   14.10
  -2   1  -9  229.26   13.47
   2   1   9  238.64   13.13
   2  -1   9  254.55   13.45
  -2   1  -9  244.87   11.76
   2  -1   9  249.21   19.82
   2   1   9  257.63   19.84
   2   1   9  266.85   12.70
  -2   1  -9  267.19   11.91
  -2  -1  -9  247.85   12.62
  -2   1  -9  279.95   17.72
  -2   1 -10 1005.70   42.47
  -2   1 -10  986.92   51.73
  -2  -1 -10  920.95   48.21
  -2   1 -10  952.21   41.02
  -2  -1 -10  983.77   42.45
   2   1  10 1041.33   40.76
   2  -1  10  957.04   40.32
   2  -1  10 1058.50   51.77
  -2   1 -10 1017.15   38.53
   2   1  10 1046.30   51.48
   2   1  10 1080.67   39.54
  -2   1 -10 1082.66   38.72
  -2  -1 -10 1088.30   39.84
   2  -1  10  980.59   39.69
  -2   1 -10 1238.81   48.80
  -2   1 -11    6.22    2.38
  -2   1 -11   16.01    5.47
  -2  -1 -11    7.16    2.57
  -2   1 -11    7.69    2.69
  -2  -1 -11    7.84    3.54
   2   1  11   12.50    2.80
  -2   1 -11    4.65    1.69
   2  -1  11   12.06    4.58
   2   1  11   13.38    4.86
  -2   1 -11   10.94    3.97
  -2  -1 -11   10.34    2.46
  -2   1 -11    9.71    2.11
   2  -1  11    7.11    2.16
   2   1  11   15.04    2.65
  -2  -1 -12   89.01   11.59
  -2   1 -12   92.34    8.79
  -2  -1 -12  105.09    9.35
  -2   1 -12   84.97   12.55
   2  -1  12  100.29    7.55
   2   1  12  116.93    7.33
   2   1  12  105.92    8.19
  -2   1 -12   99.32    6.89
  -2  -1 -12  101.32    7.39
  -2   1 -12  108.11   12.00
   2   1  13   43.99    4.97
  -2   1 -13   45.41    4.27
  -2   1 -13   44.34    5.81
  -2   1 -13   31.34    7.57
  -2  -1 -13   41.43    5.72
   2  -1  13   35.76    4.18
   2   1  14  106.17    7.70
   2  -1  14   99.80    7.55
  -2   1 -14  103.16    6.57
  -2   1 -14  107.54    8.77
   2  -1  14   99.07    6.73
   2  -1  15  114.56    7.19
  -2   1 -15   99.09    7.64
   2   1  16   81.54    5.34
   2  -1  16   68.83    5.01
  -2   1 -16   79.33    5.90
  -2  -1 -16   74.17    5.83
  -2   1 -17  221.44    9.89
  -2  -1 -17  223.82    9.97
  -2   2  17   10.82    1.80
  -2  -2  17   15.07    2.00
   2   2 -17   12.34    1.72
   2  -2 -17   13.70    1.99
  -2  -2  16    1.43    0.94
  -2   2  16    1.32    1.00
  -2  -2  16    0.39    0.87
   2   2 -16    0.77    0.89
   2   2 -16    1.43    1.41
   2  -2 -16    0.73    1.59
   2   2 -15   27.58    3.18
   2   2 -15   29.87    4.71
   2  -2 -15   32.64    4.87
   2   2 -15   27.38    3.20
  -2   2  15   24.85    3.51
  -2  -2  15   25.52    3.43
  -2  -2  15   30.23    3.62
  -2  -2  14  290.75   15.60
  -2   2  14  330.18   16.36
  -2   2  14  317.69   24.39
   2   2 -14  316.88   14.68
   2   2 -14  289.95   14.34
  -2  -2  14  275.72   22.49
   2  -2 -14  344.38   19.13
   2   2 -14  330.39   18.81
   2   2 -14  291.00   24.94
   2   2 -14  312.00   14.03
   2   2 -14  316.71   14.63
   2   2 -14  341.15   22.43
   2  -2 -14  254.92   26.93
   2   2 -14  240.08   26.40
   2  -2 -13  256.61   27.29
   2   2 -13  269.60   27.74
  -2  -2  13  287.02   15.86
  -2   2  13  311.63   16.51
   2   2 -13  324.80   15.14
   2   2 -13  315.13   14.98
  -2   2  13  279.92   23.47
  -2  -2  13  289.26   23.34
   2   2 -13  327.55   19.16
   2   2 -13  289.06   25.51
   2  -2 -13  312.24   18.89
   2   2 -13  320.55   14.98
   2   2 -13  338.54   14.80
   2  -2 -13  352.99   17.10
   2   2 -13  369.04   23.27
   2  -2 -12   50.92   11.28
   2   2 -12   46.09   10.79
   2   2 -12   61.33    7.27
   2   2 -12   56.32   10.49
   2  -2 -12   63.17    7.28
   2   2 -12   55.84    4.91
   2   2 -12   59.94    5.09
  -2   2  12   58.77    9.83
  -2  -2  12   47.77    8.89
  -2  -2  12   54.01    5.49
  -2   2  12   58.84    5.76
   2   2 -12   60.64    5.09
   2  -2 -12   59.73    5.70
   2  -2 -12   67.70    6.61
   2   2 -12   62.95    8.88
   2   2 -11   11.11    2.95
   2   2 -11   14.41    5.37
   2  -2 -11   14.05    3.21
   2   2 -11   14.75    2.48
  -2   2  11   11.75    4.29
   2   2 -11   14.11    2.42
  -2  -2  11   13.78    4.56
  -2  -2  11   12.72    2.58
  -2  -2  11   17.85    2.91
  -2   2  11   12.78    2.56
   2  -2 -11   14.82    2.83
   2   2 -11   16.31    2.58
   2  -2 -11   15.77    3.47
   2   2 -11   20.24    4.98
   2   2 -10  221.54   13.66
   2  -2 -10  211.37   13.37
   2   2 -10  233.56   19.82
   2   2 -10  225.39   11.31
  -2  -2  10  243.19   18.17
   2   2 -10  211.24   11.06
  -2   2  10  238.13   18.19
  -2  -2  10  215.65   11.85
  -2   2  10  236.14   12.27
  -2  -2  10  243.12   12.39
   2   2 -10  239.25   11.54
   2  -2 -10  261.41   13.21
   2   2 -10  203.33   10.31
   2  -2 -10  281.80   15.15
   2   2 -10  284.66   18.25
  -2   2   9  598.11   23.71
  -2  -2   9  585.56   23.76
  -2  -2   9  569.73   23.39
   2   2  -9  552.02   22.65
  -2  -2   9  623.24   30.75
  -2   2   9  570.17   30.28
   2   2  -9  575.05   22.96
   2   2  -9  556.45   21.98
   2   2  -9  577.34   23.03
   2  -2  -9  596.85   24.93
   2  -2  -9  427.27   25.20
   2  -2  -9  570.87   25.09
   2   2  -9  626.85   25.77
   2   2  -9  713.11   31.73
  -2  -2   8  115.70    6.86
  -2   2   8  102.38    9.90
   2   2  -8  102.26    6.30
   2  -2  -8  100.85    7.22
  -2  -2   8  108.79   10.15
   2   2  -8  104.08    6.19
  -2  -2   8  113.92    6.11
   2   2  -8  101.01    6.00
   2   2  -8  114.01    6.33
   2  -2  -8  111.30    7.84
   2   2  -8  105.12    6.43
   2   2  -8  110.76   10.37
  -2  -2   8  108.65    6.24
   2  -2  -8   76.73    7.40
   2  -2  -7  319.82   16.81
  -2  -2   7  398.57   15.67
   2   2  -7  364.51   14.94
   2   2  -7  333.16   14.96
  -2  -2   7  367.24   14.44
   2   2  -7  341.50   14.71
   2   2  -7  352.91   14.86
   2  -2  -7  399.81   17.92
   2   2  -7  352.37   15.21
   2   2  -7  341.46   14.80
   2   2  -7  400.31   17.72
  -2  -2   7  378.68   14.85
   2   2  -6   41.69    3.20
   2   2  -6   29.77    2.66
   2   2  -6   43.78    6.08
   2  -2  -6   30.70    3.57
   2  -2  -6   37.26    4.42
   2   2  -6   26.86    2.59
   2   2  -6   28.79    2.68
   2   2  -6   29.36    2.70
   2   2  -6   28.14    3.59
   2  -2  -6   26.78    4.64
  -2  -2   6   31.48    2.61
   2   2  -5  159.28    9.64
   2   2  -5  204.26   12.99
   2  -2  -5  160.49    8.71
  -2  -2   5  186.14   10.76
  -2   2   5  189.64   10.95
   2  -2  -4  376.92   18.62
   2   2  -4  375.55   18.72
  -2  -2   4  361.91   16.59
  -2   2   4  353.47   16.62
   2  -2  -3   31.15    3.72
   2   2  -3   38.42    4.17
   2   2  -3   36.11    4.23
  -2   2   3   30.98    3.26
  -2  -2   3   34.40    3.32
   2   2  -2   60.91    5.31
   2   2  -2   74.25    5.26
   2  -2  -2   64.10    4.91
   2   2  -2   71.89    5.71
  -2  -2   2   66.76    5.37
   2  -2  -1  751.73   27.61
   2   2  -1  771.86   27.87
  -2  -2   1  718.21   28.24
   2   2  -1  790.73   28.81
   2   2   0 4768.41  156.37
   2  -2   0 4841.16  156.44
  -2  -2   0 4801.39  158.23
   2  -2   1  108.13    6.45
   2   2   1  105.48    6.33
  -2  -2  -1  108.24    7.75
  -2   2  -2   20.49    2.52
  -2  -2  -2   22.74    3.61
  -2  -2  -2   22.88    3.30
  -2   2  -2   18.37    2.93
   2  -2   3  580.38   24.17
   2   2   3  513.68   23.62
  -2   2  -3  512.09   22.52
  -2  -2  -3  536.42   25.28
  -2   2  -3  539.04   24.15
  -2  -2  -3  518.56   23.96
   2   2   4 1422.25   53.55
   2  -2   4 1382.68   53.11
  -2   2  -4 1310.21   51.86
  -2  -2  -4 1330.30   54.68
  -2   2  -4 1360.89   53.89
  -2  -2  -4 1378.66   54.10
  -2   2  -5  212.45   13.43
  -2  -2  -5  218.17   15.31
   2   2   5  229.07   14.59
   2  -2   5  248.71   14.87
   2  -2   6   54.04    6.80
   2   2   6   46.33    6.45
   2   2   6   47.73    4.07
   2  -2   6   57.57    4.31
  -2   2  -6   49.20    3.53
  -2  -2  -6   40.15    4.02
  -2   2  -6   43.17    5.64
   2   2   7  626.54   30.98
   2  -2   7  642.65   31.18
  -2   2  -7  546.27   21.53
   2  -2   7  616.36   23.56
   2   2   7  586.17   23.45
  -2   2  -7  545.17   21.74
  -2  -2  -7  508.12   23.19
  -2   2  -7  629.38   28.01
  -2  -2  -8  301.99   14.53
  -2   2  -8  228.85   13.46
   2   2   8  346.95   21.70
   2  -2   8  321.27   21.06
  -2   2  -8  278.67   12.40
   2   2   8  329.81   14.64
   2  -2   8  288.91   14.10
  -2   2  -8  287.76   12.57
  -2  -2  -8  264.29   13.88
  -2   2  -8  321.18   18.11
  -2   2  -9  262.26   15.04
  -2  -2  -9  301.51   20.14
  -2  -2  -9  315.58   15.80
  -2   2  -9  321.06   17.00
  -2  -2  -9  299.11   16.76
   2   2   9  335.41   23.03
  -2   2  -9  306.88   13.57
   2  -2   9  335.95   23.20
   2  -2   9  353.65   15.99
   2   2   9  306.39   15.38
  -2   2  -9  304.29   13.55
  -2  -2  -9  292.83   14.88
  -2   2  -9  341.90   19.76
   2  -2  10   32.58    4.13
   2   2  10   34.99    4.23
   2  -2  10   19.19    5.56
  -2   2 -10   28.75    3.14
   2   2  10   27.96    6.58
  -2   2 -10   27.93    3.08
  -2  -2 -10   30.84    4.72
  -2   2 -10   18.40    6.01
  -2  -2 -10   25.70    3.96
  -2  -2 -10   31.77    6.15
  -2   2 -10   34.14    4.97
  -2   2 -10   26.59    5.35
   2   2  11   43.29    4.94
   2  -2  11   42.27    4.86
  -2   2 -11   31.99    3.52
   2  -2  11   45.71    4.96
  -2   2 -11   39.28    3.81
  -2  -2 -11   41.27    4.90
  -2   2 -11   39.92    5.70
  -2   2 -11   40.12    8.77
  -2  -2 -11   40.27    5.71
  -2   2 -11   35.34    6.37
   2   2  12  121.74    8.76
   2  -2  12  122.76    8.80
  -2   2 -12  126.83    7.59
  -2   2 -12  120.12    7.39
   2  -2  12  115.27    8.48
  -2   2 -12  119.30   12.12
  -2   2 -12  128.27   10.31
  -2   2 -12   99.69   14.04
  -2  -2 -12  127.95   10.40
  -2  -2 -12  129.35    9.22
  -2   2 -13  383.83   29.21
  -2  -2 -13  442.45   20.86
  -2   2 -13  476.82   23.13
  -2  -2 -13  484.77   23.40
   2  -2  13  454.11   20.41
   2   2  13  422.43   20.43
   2  -2  13  434.08   20.40
  -2   2 -13  448.63   19.00
  -2   2 -13  482.96   26.90
   2   2  14  199.36   10.11
   2  -2  14  189.71   10.97
   2   2  14  206.09   11.41
  -2   2 -14  211.18   10.26
  -2   2 -14  221.67   13.21
  -2  -2 -14  219.74   13.28
   2  -2  14  183.30   10.63
  -2  -2 -14  226.72   11.34
   2  -2  15    4.55    1.51
   2   2  15    3.79    1.47
  -2   2 -15    5.25    1.29
  -2   2 -15    3.73    1.79
  -2  -2 -15    3.83    1.75
  -2  -2 -15    4.44    1.32
   2  -2  15    4.82    1.40
   2   2  16    1.08    0.89
   2  -2  16    0.42    0.81
  -2  -2 -16    1.96    1.20
  -2   2 -16    0.88    0.96
   2   3 -17    6.97    1.20
   2  -3 -17    7.88    1.51
   2  -3 -17    7.37    1.38
  -2  -3  16   12.87    2.08
  -2   3  16   21.78    2.59
  -2  -3  16   15.47    2.28
   2  -3 -16   19.29    2.70
   2   3 -16   16.79    2.17
   2  -3 -16   21.07    3.18
   2   3 -15  176.39    9.09
   2   3 -15  168.97   11.08
   2  -3 -15  173.30   11.34
   2   3 -15  167.30    8.96
  -2  -3  15  168.88    9.56
  -2   3  15  183.11   10.02
  -2  -3  15  179.81    9.97
   2   3 -14    1.87    1.27
   2  -3 -14   -0.33    2.33
   2   3 -14   -0.65    2.24
   2   3 -14    1.21    1.12
   2   3 -14    0.46    0.98
  -2   3  14    1.78    1.58
  -2  -3  14    0.21    1.28
   2   3 -13  122.54   10.32
   2   3 -13  114.44   15.68
   2  -3 -13  132.38   10.80
  -2  -3  13  116.39   13.76
  -2   3  13  134.37   15.17
   2   3 -13  141.67    8.18
   2   3 -13  124.56    7.76
  -2   3  13  121.82    8.88
  -2  -3  13  124.02    8.66
   2   3 -13  129.93    7.81
   2  -3 -13   95.54   15.85
   2   3 -13   87.89   14.99
   2   3 -13  154.13   13.71
   2   3 -12  118.76   10.01
   2  -3 -12  117.53   10.08
   2   3 -12  120.39   15.82
  -2  -3  12  110.03   13.42
   2   3 -12  125.96    7.72
  -2   3  12  143.04   15.41
   2   3 -12  129.58    7.82
  -2  -3  12  107.42    8.13
  -2   3  12  124.99    8.88
   2   3 -12  125.06    7.65
   2   3 -12   87.07   15.10
   2  -3 -12   83.77   14.89
   2   3 -12  145.17   13.23
   2  -3 -11  963.91   41.18
   2   3 -11  948.48   41.02
   2   3 -11  953.91   37.25
   2   3 -11  992.93   37.40
  -2   3  11 1058.75   50.30
  -2  -3  11 1006.24   48.72
  -2  -3  11 1041.30   39.63
  -2   3  11 1022.42   39.38
  -2  -3  11  957.64   38.60
   2   3 -11 1021.77   37.59
   2  -3 -11  772.15   50.84
   2   3 -11  754.33   50.62
   2   3 -11 1205.01   48.29
   2  -3 -10   37.14    5.02
   2   3 -10   31.85    4.76
  -2  -3  10   46.12    4.71
  -2  -3  10   38.65    4.24
  -2   3  10   45.67    4.63
   2   3 -10   35.81    3.61
  -2   3  10   37.16    7.30
   2   3 -10   37.22    3.78
  -2  -3  10   35.21    6.88
   2   3 -10   38.26    3.78
   2   3 -10   45.28    7.09
   2   3 -10   23.62    7.11
   2  -3 -10   31.50    8.05
   2  -3  -9    0.96    1.21
   2   3  -9    0.70    2.17
   2   3  -9    0.75    1.10
  -2   3   9    1.27    1.01
  -2  -3   9    1.90    1.13
  -2  -3   9    1.88    1.25
  -2   3   9    2.62    2.06
  -2  -3   9    0.50    1.71
   2   3  -9    2.10    0.98
  -2  -3   9    1.84    0.99
   2   3  -9    0.98    0.93
   2   3  -9    4.65    1.28
   2   3  -9    1.18    0.79
   2   3  -9    0.47    0.98
  -2  -3   9    3.13    1.31
  -2  -3   8  241.64   11.24
  -2  -3   8  239.21   11.64
  -2   3   8  263.59   11.68
   2   3  -8  206.38   10.72
  -2   3   8  255.51   16.69
   2   3  -8  217.48   10.53
  -2  -3   8  225.72   15.75
  -2  -3   8  231.15   10.48
   2   3  -8  208.89   10.47
   2   3  -8  206.92   10.29
   2  -3  -8  237.80   13.51
   2   3  -8  210.45   10.42
   2   3  -8  208.58   10.89
   2  -3  -8  208.35    9.96
  -2  -3   8  228.83   10.92
   2   3  -8  254.96   17.53
   2   3  -8  239.06   18.67
   2  -3  -7 1708.41   59.80
  -2  -3   7 1802.32   60.61
   2   3  -7 1740.76   69.24
   2   3  -7 1753.49   60.26
   2   3  -7 1638.34   60.47
  -2   3   7 1894.56   67.85
  -2  -3   7 1792.39   67.10
  -2  -3   7 1726.48   59.89
   2   3  -7 1660.65   60.17
   2  -3  -7 1663.60   64.55
   2   3  -7 1670.29   60.08
   2   3  -7 1574.50   60.05
   2   3  -7 1783.44   63.26
   2   3  -7 1938.04   72.39
   2   3  -6  205.31   15.02
   2  -3  -6  170.07    8.42
  -2  -3   6  205.28    9.10
   2   3  -6  191.43    8.80
  -2  -3   6  211.77   12.79
  -2   3   6  210.42   12.82
  -2  -3   6  195.67    8.66
   2   3  -6  174.79    8.70
   2   3  -6  170.22    8.21
   2  -3  -6  166.12   11.48
   2   3  -6  176.47    8.61
   2   3  -6  177.91    8.70
   2   3  -6  183.59   10.81
   2  -3  -6  200.97   14.56
   2   3  -6  206.49   14.98
  -2  -3   5   76.60    4.51
   2   3  -5   86.88    8.44
   2  -3  -5   77.58    7.91
   2   3  -5   94.94    8.91
   2   3  -5   79.35    4.66
   2  -3  -4  169.03   10.96
   2   3  -4  186.68   11.60
   2   3  -4  187.05   12.30
  -2  -3   4  161.27    9.64
  -2   3   4  177.38   10.03
   2  -3  -3  895.26   36.05
   2   3  -3  966.11   36.79
  -2  -3   3  987.53   38.27
   2   3  -3 1051.54   39.06
  -2  -3   3  898.46   35.04
  -2   3   3  915.70   35.22
  -2  -3   2  327.51   15.86
  -2   3   2  309.29   13.35
  -2  -3   2  295.62   13.16
   2   3  -2  303.75   16.37
   2  -3  -2  313.63   14.03
   2   3  -2  341.10   14.43
   2   3  -1   85.23    7.73
  -2  -3   1  105.16    7.16
   2   3   0   99.63    8.47
   2  -3   0  109.82    5.78
   2   3   1 1643.00   55.29
   2   3   1 1570.29   60.29
  -2   3  -1 1504.32   55.95
  -2  -3  -1 1458.46   55.94
   2  -3   1 1507.43   53.44
   2  -3   2  237.04   10.90
  -2  -3  -2  239.96   11.25
  -2   3  -2  221.73   10.91
  -2   3  -3   31.59    2.44
  -2   3  -3   35.76    4.22
  -2  -3  -3   40.02    4.70
  -2   3  -3   32.77    4.29
  -2  -3  -4    1.63    0.95
  -2   3  -4    1.36    1.37
   2  -3   5  603.12   24.06
  -2   3  -5  658.23   29.64
   2  -3   6  179.43    9.29
   2   3   6  211.64    9.94
   2  -3   6  183.51   13.56
  -2   3  -6  158.49    8.28
   2   3   6  229.23   15.17
   2  -3   6  184.60    9.50
  -2  -3  -6  222.29   16.56
  -2   3  -6  164.86   12.69
  -2   3  -7  463.37   20.37
  -2   3  -7  503.69   20.28
   2  -3   7  607.75   29.71
   2   3   7  607.79   30.18
   2   3   7  584.90   22.38
   2  -3   7  547.89   21.90
  -2   3  -7  507.70   26.71
   2   3   8  289.25   13.58
   2  -3   8  266.49   13.10
  -2   3  -8  233.37   11.54
  -2   3  -8  242.61   11.42
   2   3   8  322.59   20.93
   2  -3   8  282.01   19.58
  -2  -3  -8  265.59   14.62
  -2   3  -8  233.88   21.20
  -2  -3  -8  254.37   13.39
  -2   3  -8  250.16   14.12
  -2   3  -8  259.34   16.95
   2  -3   9   10.20    2.41
   2   3   9   10.06    2.42
  -2   3  -9   11.26    1.96
  -2   3  -9    9.53    1.80
  -2  -3  -9    8.77    2.69
  -2  -3  -9   11.15    2.54
  -2   3  -9   11.05    4.89
  -2   3  -9    8.20    2.51
  -2   3  -9    7.30    2.95
   2  -3  10   17.36    3.12
   2   3  10   31.84    4.03
  -2   3 -10   16.87    2.42
  -2   3 -10   17.22    2.41
  -2  -3 -10   19.66    3.91
  -2  -3 -10   14.13    2.94
  -2   3 -10   21.88    4.03
  -2   3 -10   16.45    5.86
  -2   3 -10   20.22    4.84
   2   3  10   23.02    4.71
  -2  -3 -10   16.60    2.95
   2  -3  11  436.26   20.20
   2   3  11  442.76   20.35
  -2   3 -11  427.08   18.19
   2  -3  11  455.69   20.87
  -2   3 -11  405.17   17.98
  -2  -3 -11  452.30   20.80
  -2  -3 -11  445.15   22.52
  -2   3 -11  416.49   21.91
  -2  -3 -11  412.18   18.99
  -2   3 -11  450.60   25.31
   2   3  12  195.50   11.16
   2  -3  12  159.46   10.25
  -2   3 -12  167.95    9.15
  -2   3 -12  160.87    8.97
   2  -3  12  159.09   10.57
  -2  -3 -12  188.81   11.37
  -2   3 -12  172.75   14.41
  -2   3 -12  186.59   12.61
  -2  -3 -12  178.89   12.52
  -2  -3 -12  184.09   11.16
   2  -3  13    2.79    1.58
  -2  -3 -13    1.10    1.48
   2   3  13    2.31    1.55
   2  -3  13    1.80    1.48
  -2   3 -13    2.82    1.30
  -2   3 -13    1.51    1.93
  -2  -3 -13    3.05    2.13
   2  -3  14   57.11    5.11
  -2  -3 -14   69.04    5.50
   2   3  14   69.19    5.48
   2   3  14   67.82    5.08
   2  -3  14   58.90    5.01
  -2   3 -14   72.95    4.89
  -2   3 -14   83.36    6.85
  -2  -3 -14   70.89    6.52
  -2   3 -15  213.87   10.79
  -2  -3 -15  190.84    9.27
   2  -3  15  189.58    9.41
   2   3  15  182.43    9.33
   2  -3  15  184.43    9.20
  -2   3 -16   29.95    2.65
  -2  -3 -16   35.60    3.06
  -2  -4  17   58.60    3.62
   2  -4 -17   71.36    4.02
  -2  -4  16   22.83    2.59
   2  -4 -16   30.39    2.95
   2  -4 -16   30.48    3.11
   2   4 -16   26.09    2.43
   2  -4 -16   35.60    3.70
   2   4 -15  135.03    7.36
   2  -4 -15  154.91    9.09
   2   4 -15  132.87    7.33
  -2  -4  15  134.74    8.15
   2   4 -14   24.46    2.84
   2  -4 -14   25.86    3.84
  -2   4  14   23.76    3.17
   2   4 -14   19.44    2.66
   2   4 -13  150.04    8.52
   2   4 -13  153.57    8.35
   2   4 -13  136.50   10.01
   2  -4 -13  143.53   10.65
   2   4 -13  143.80    8.36
  -2  -4  13  148.96    9.33
  -2   4  13  162.23    9.59
   2   4 -13  157.12   13.81
  -2   4  12    8.57    2.10
  -2  -4  12   11.77    2.50
  -2  -4  12    4.76    4.02
   2   4 -12   11.99    2.25
   2   4 -12    9.48    2.70
   2   4 -12    2.86    3.27
   2  -4 -12    7.65    2.82
   2   4 -12   12.06    2.19
   2   4 -12    9.19    2.19
   2   4 -12   11.55    3.88
   2   4 -11  188.83   12.60
   2   4 -11  222.51   21.68
   2  -4 -11  199.47   13.15
  -2   4  11  238.37   12.62
  -2  -4  11  228.82   12.76
  -2  -4  11  211.06   12.14
  -2   4  11  243.11   19.78
  -2  -4  11  229.31   19.50
   2   4 -11  218.19   11.26
   2   4 -11  233.06   11.31
   2   4 -11  229.38   11.48
   2  -4 -11  144.77   18.46
   2   4 -11  122.09   16.72
   2   4 -11  243.47   17.75
   2  -4 -10  157.68   11.29
   2   4 -10  186.75   19.13
  -2  -4  10  180.81   11.00
  -2   4  10  213.46   11.41
  -2  -4  10  190.93   10.98
  -2   4  10  196.66   17.08
   2   4 -10  194.61   10.04
   2   4 -10  189.65   10.16
  -2  -4  10  220.90   18.06
  -2  -4  10  212.84   10.78
   2   4 -10  171.46    9.97
   2   4 -10  180.16    9.72
   2   4 -10  120.46   15.81
   2  -4 -10  132.07   16.37
   2   4 -10  197.57   16.08
   2  -4 -10  184.31    9.48
   2  -4  -9  336.47   17.77
   2   4  -9  339.86   26.21
  -2   4   9  394.91   17.45
  -2  -4   9  412.39   17.67
   2   4  -9  358.31   16.59
  -2  -4   9  431.48   25.38
   2   4  -9  412.69   16.73
  -2   4   9  390.08   24.34
  -2  -4   9  384.09   16.55
   2   4  -9  365.67   16.84
   2   4  -9  343.70   16.05
   2   4  -9  375.56   16.15
   2  -4  -9  283.43   23.90
   2   4  -9  260.06   23.06
   2   4  -9  421.41   24.91
   2  -4  -9  374.14   16.10
  -2  -4   9  384.70   17.11
   2   4  -8  161.24   16.09
  -2   4   8  181.57    9.50
  -2  -4   8  179.50    9.46
   2   4  -8  161.41    9.10
   2   4  -8  170.65    8.89
  -2   4   8  180.69   14.29
  -2  -4   8  179.83   14.29
  -2  -4   8  175.71    8.90
   2   4  -8  146.28    8.52
   2   4  -8  157.57    8.73
   2   4  -8  158.41    8.64
   2   4  -8  163.88   14.57
   2  -4  -8  168.20    8.74
  -2  -4   8  172.52    9.35
   2   4  -8  131.50   14.20
   2  -4  -8  120.89   13.61
   2   4  -7    7.87    3.29
   2  -4  -7   10.86    3.83
   2   4  -7   16.34    4.63
  -2  -4   7   12.44    2.20
  -2  -4   7   10.46    1.82
  -2   4   7   14.08    3.63
   2   4  -7    9.60    1.81
  -2  -4   7   10.62    3.12
  -2  -4   7   13.77    2.05
   2   4  -7   10.89    1.70
   2   4  -7    9.26    1.88
   2   4  -7   14.88    2.25
   2   4  -7   10.08    2.42
  -2  -4   7   10.69    2.03
   2  -4  -7   13.38    2.04
   2   4  -7   12.48    4.01
   2   4  -6   66.74    8.90
  -2  -4   6   66.63    4.98
  -2  -4   6   68.17    6.96
  -2   4   6   76.81    7.41
   2   4  -6   66.19    4.60
  -2  -4   6   70.75    4.71
   2   4  -6   64.25    4.28
   2   4  -6   59.60    4.45
  -2  -4   6   74.52    5.02
   2  -4  -6   63.15    4.62
   2   4  -6   65.14    8.11
   2  -4  -6   63.82    7.93
   2   4  -6   55.52    7.36
   2   4  -5  833.45   37.34
   2  -4  -5  849.34   37.49
   2   4  -5  971.69   41.60
  -2  -4   5  888.65   33.05
   2   4  -5  937.23   32.49
  -2   4   5  866.51   35.72
  -2  -4   5  865.95   35.64
  -2  -4   5  933.58   32.51
   2   4  -5  823.19   31.89
   2   4  -5  823.38   31.47
   2  -4  -5  846.96   32.46
  -2  -4   5  978.45   33.22
   2  -4  -4    0.22    0.59
  -2   4   4    1.97    1.00
  -2  -4   4    1.05    0.85
  -2  -4   4    0.35    0.84
   2   4  -4    1.14    1.30
   2   4  -4    0.68    0.89
   2  -4  -4    0.23    0.77
   2  -4  -4    1.60    0.82
  -2  -4   3  145.60    7.81
   2   4  -3  198.22   12.64
  -2  -4   3  187.57   11.82
   2  -4  -3  147.03    8.04
   2   4  -3  184.88   11.81
   2  -4  -3  159.80    7.86
   2  -4  -3  153.72    8.49
  -2  -4   2   57.40    3.74
  -2  -4   2   54.74    5.57
   2   4  -2   68.01    6.30
   2   4  -2   64.04    6.78
  -2  -4   2   54.75    3.56
  -2  -4   2   55.36    3.66
   2   4  -1 1225.30   52.84
   2  -4  -1 1337.07   46.37
  -2  -4   1 1293.54   46.40
  -2  -4   1 1305.24   46.45
  -2  -4   1 1338.36   50.49
  -2  -4   0    0.21    0.58
  -2   4   0    1.88    0.98
  -2  -4   0    0.68    0.65
   2   4   0    1.57    1.81
   2  -4   0    0.86    0.66
  -2  -4   0   -0.39    1.22
   2  -4   0    0.43    0.63
  -2  -4   0    0.74    0.53
  -2  -4  -1  669.59   25.35
  -2  -4  -1  656.23   25.08
  -2   4  -1  629.80   27.91
   2   4   1  687.79   32.00
   2  -4   1  627.34   24.38
  -2  -4  -1  675.05   32.51
   2  -4   2   50.74    3.85
   2  -4   2   47.13    3.41
  -2  -4  -2   48.83    4.21
  -2  -4  -2   52.63    4.24
   2  -4   2   47.07    3.55
  -2   4  -2   52.94    4.92
   2   4   2   57.29    7.16
  -2  -4  -2   47.26    6.94
  -2   4  -3  696.06   26.34
   2  -4   3  702.05   27.93
   2  -4   3  680.16   25.25
   2   4   3  625.38   27.06
   2  -4   3  646.47   25.14
  -2  -4  -3  662.51   26.95
  -2  -4  -3  673.21   26.95
  -2   4  -4   11.21    3.04
   2  -4   4    9.19    1.67
  -2  -4  -4    9.38    2.06
  -2  -4  -5  683.07   28.71
  -2   4  -5  617.78   34.44
   2  -4   6   59.39    4.70
  -2   4  -6   63.48    4.52
  -2   4  -6   64.35    9.32
   2  -4   6   68.22    5.17
  -2  -4  -6   60.86    5.89
  -2  -4  -6   78.59   10.27
  -2   4  -6   70.26    8.25
  -2   4  -7  318.58   14.09
   2   4   7  320.60   14.83
   2  -4   7  367.28   15.26
  -2  -4  -7  318.85   16.75
  -2  -4  -7  288.52   15.87
  -2   4  -7  332.59   20.84
  -2  -4  -7  346.07   15.78
  -2   4  -7  279.54   22.85
  -2  -4  -8    1.90    1.29
  -2  -4  -8    2.32    1.39
   2  -4   8    1.07    0.99
   2   4   8    1.99    1.13
  -2   4  -8    0.79    0.84
  -2  -4  -8    3.22    1.71
  -2   4  -8    2.05    1.16
  -2   4  -8    2.40    2.21
  -2  -4  -8    3.96    1.69
  -2  -4  -9  444.54   22.83
  -2  -4  -9  508.97   22.16
  -2   4  -9  408.87   31.74
   2   4   9  542.94   21.85
   2  -4   9  525.85   21.58
  -2   4  -9  474.09   19.67
  -2  -4  -9  501.72   23.20
  -2   4  -9  443.65   19.70
   2   4   9  463.64   27.29
  -2   4  -9  455.78   26.47
  -2  -4  -9  478.84   22.35
  -2   4 -10   57.31   11.15
  -2  -4 -10   48.04    6.11
  -2  -4 -10   69.88    6.22
  -2   4 -10   50.80    5.89
   2  -4  10   63.11    5.66
   2   4  10   76.50    6.14
  -2   4 -10   58.61    4.62
  -2  -4 -10   66.99    6.55
  -2   4 -10   52.15    4.46
   2   4  10   37.21    6.77
  -2  -4 -10   60.38    5.77
  -2   4 -10   59.15    8.08
   2  -4  11   14.85    2.85
   2   4  11   14.64    2.78
  -2   4 -11   15.66    2.37
  -2   4 -11   15.96    2.36
  -2  -4 -11   10.19    2.34
  -2   4 -11   13.26    3.98
  -2   4 -11   13.37    3.18
  -2  -4 -11   14.09    2.81
  -2  -4 -11   10.43    3.01
  -2   4 -11   17.77    6.31
  -2  -4 -11   15.85    3.35
   2  -4  12  112.67    8.01
  -2  -4 -12  119.70    8.59
   2   4  12   96.62    7.17
   2  -4  12  119.75    7.85
  -2   4 -12  101.39    6.39
  -2   4 -12  115.48   11.26
  -2   4 -12   95.07   14.17
  -2   4 -12   95.83    8.10
  -2  -4 -12  102.41    7.57
  -2  -4 -12   99.22    8.64
   2   4  13  197.35   10.67
  -2   4 -13  206.56    9.97
   2  -4  13  221.59   11.77
  -2   4 -13  187.55   11.51
  -2  -4 -13  237.62   12.16
   2  -4  13  197.34   11.14
   2   4  14    6.06    1.43
  -2  -4 -14    0.59    1.06
  -2   4 -14    3.15    1.36
   2  -4  14    3.94    1.48
  -2  -4 -14    3.90    1.44
  -2  -4 -15    0.55    0.88
  -2  -4 -15    1.25    0.85
   2  -4  15    0.53    0.69
   2   4  15    0.89    0.77
  -2  -4 -16    2.25    0.88
   2  -5 -16    5.57    1.37
   2   5 -15   58.41    3.88
  -2  -5  15   58.02    4.43
   2  -5 -15   68.58    5.09
   2  -5 -15   62.55    4.60
   2   5 -15   54.73    3.74
   2  -5 -15   71.34    5.83
   2   5 -14  106.18    6.22
   2  -5 -14  119.64    7.94
   2   5 -14  101.05    6.13
   2   5 -13   55.93    4.44
   2  -5 -13   67.66    6.50
   2   5 -13   56.27    4.51
   2   5 -12   22.10    5.02
   2   5 -12   18.50    2.56
   2   5 -12   15.99    2.60
   2  -5 -12   17.19    3.85
   2   5 -12   11.89    5.12
   2   5 -11   31.37    3.58
   2   5 -11   33.44    3.44
   2   5 -11   32.60    3.63
   2   5 -11   25.02    7.59
  -2  -5  11   12.36    5.45
   2   5 -11   26.47    5.78
  -2  -5  10  218.01   12.81
   2   5 -10  234.87   11.59
   2   5 -10  223.94   11.91
   2  -5 -10  297.75   19.27
  -2  -5  10  250.33   12.56
   2   5 -10  229.15   12.05
   2   5 -10  228.14   11.51
   2   5 -10  194.43   20.49
  -2  -5  10  135.85   18.49
   2   5 -10  250.78   19.05
   2  -5 -10  248.97   11.93
  -2  -5   9  138.96    9.10
   2   5  -9  133.29    7.90
   2   5  -9  126.55    8.19
  -2  -5   9  133.98    8.17
   2  -5  -9  155.87   14.54
   2   5  -9  133.37    8.49
   2   5  -9  126.28    7.80
   2   5  -9  135.45    7.83
   2   5  -9  127.70    7.73
   2   5  -9  120.76   15.16
  -2  -5   9  142.57    8.73
   2  -5  -9  135.60    8.12
   2   5  -9  137.79   13.85
  -2  -5   8   66.60    5.75
   2   5  -8   69.70    5.16
   2   5  -8   65.73    5.36
  -2  -5   8   63.15    5.05
   2  -5  -8   46.10    8.48
   2   5  -8   58.81    4.92
   2   5  -8   63.94    5.08
   2   5  -8   60.47    4.89
   2   5  -8   61.25   10.21
  -2  -5   8   40.27    8.35
   2   5  -8   67.97    9.52
   2  -5  -8   59.94    5.02
  -2  -5   8   69.22    5.55
  -2  -5   7  241.87   12.38
   2   5  -7  259.34   11.73
   2  -5  -7  195.33   13.22
  -2  -5   7  241.80   11.60
   2  -5  -7  217.63   17.09
   2   5  -7  242.72   11.62
   2   5  -7  233.95   11.52
   2   5  -7  228.40   10.65
   2   5  -7  244.33   11.53
  -2  -5   7  223.45   11.62
   2  -5  -7  228.23   11.61
   2   5  -7  251.47   18.92
   2   5  -7  236.42   19.86
   2   5  -6   44.33    7.75
  -2  -5   6   34.74    6.46
  -2  -5   6   43.00    4.25
   2   5  -6   48.30    3.99
   2  -5  -6   38.80    4.61
  -2  -5   6   44.08    3.94
   2  -5  -6   39.66    5.91
   2   5  -6   43.39    3.63
   2   5  -6   45.89    3.88
   2  -5  -6   36.93    3.79
   2   5  -6   43.82    7.29
   2  -5  -6   49.80    4.68
   2  -5  -5   13.89    2.38
  -2  -5   5   11.78    3.53
   2   5  -5    9.09    3.35
   2  -5  -5   20.14    3.42
   2  -5  -5   17.41    2.74
  -2  -5   5   11.91    1.94
  -2  -5   5   10.84    2.03
   2   5  -5   12.66    1.92
   2   5  -5    9.56    1.60
   2  -5  -5   15.45    2.34
   2   5  -4  133.68   11.93
  -2  -5   4  116.36   10.63
  -2  -5   4  123.34    7.29
   2  -5  -4  127.76    7.45
   2  -5  -4  112.06    7.83
   2  -5  -4  124.04    6.57
   2   5  -4  117.15    6.45
   2   5  -4  112.01    6.22
   2  -5  -4  130.65    7.36
  -2  -5   4  137.07    7.39
  -2  -5   3 1009.67   37.50
   2   5  -3  953.51   36.37
   2   5  -3 1013.53   36.55
   2   5  -3 1182.45   45.44
  -2  -5   3 1075.84   43.63
   2  -5  -3 1094.20   37.72
   2  -5  -3  982.26   36.33
   2  -5  -3  965.45   37.97
  -2  -5   3 1026.47   36.55
  -2  -5   3 1088.51   37.87
   2  -5  -2  110.78    6.01
   2  -5  -2   85.13    5.07
   2  -5  -2  100.72    6.19
  -2  -5   2  108.08    5.87
  -2  -5   2  112.62    6.30
   2  -5  -2  102.04    6.20
   2   5  -2  116.64   10.64
  -2  -5   2  108.11    9.12
  -2  -5   2  102.87   11.09
   2  -5  -1  439.80   18.76
  -2  -5   1  534.83   20.42
   2   5  -1  517.64   27.70
  -2  -5   1  518.30   19.97
   2  -5  -1  504.85   19.99
  -2  -5   1  483.58   28.33
   2  -5  -1  497.59   19.38
  -2  -5   1  530.63   20.43
   2  -5   0   68.39    4.47
  -2  -5   0   81.92    5.38
  -2  -5   0   80.87    5.42
  -2  -5   0   80.08    5.52
   2  -5   0   75.32    5.03
   2   5   0   67.40    8.84
  -2  -5   0   78.82    9.77
   2  -5   0   79.82    4.83
  -2   5  -1  714.64   29.60
  -2  -5  -1  698.16   26.67
   2  -5   1  646.27   25.05
  -2  -5  -1  697.41   26.40
  -2  -5  -1  728.93   27.17
   2  -5   1  601.56   24.52
   2   5   1  740.50   35.72
  -2  -5  -1  696.49   36.23
  -2   5  -2   55.60    6.73
  -2  -5  -2   60.90    4.94
  -2  -5  -2   65.96    5.29
   2  -5   2   57.44    4.20
   2  -5   2   59.56    4.12
  -2  -5  -2   62.82    5.28
  -2   5  -2   66.65    6.45
   2   5   2   63.11    8.63
  -2  -5  -2   58.87    8.97
  -2   5  -3  766.40   39.11
  -2  -5  -3  919.63   35.59
   2  -5   3  859.98   33.16
  -2  -5  -3  904.26   35.57
  -2  -5  -3  826.43   34.88
  -2   5  -3 1068.46   41.10
   2  -5   3  901.13   33.14
   2   5   3  982.54   44.41
  -2  -5  -3 1050.32   47.29
   2  -5   4    8.06    1.77
  -2  -5  -4    6.79    2.16
  -2   5  -4    9.09    3.08
  -2  -5  -4    6.64    3.47
  -2  -5  -4   10.75    2.56
  -2   5  -4    7.94    3.25
  -2   5  -5  131.59   13.49
  -2   5  -5  194.09   14.77
  -2  -5  -5  124.99   10.69
  -2  -5  -5  155.91   10.48
   2   5   5  174.43   15.36
  -2  -5  -5  183.89   16.95
  -2   5  -6   26.96    3.03
   2   5   6   30.82    6.47
  -2   5  -6   31.23    6.05
  -2  -5  -6   21.16    3.58
  -2  -5  -6   27.33    4.26
   2  -5   6   21.31    3.91
  -2  -5  -6   20.92    4.73
  -2   5  -6   19.74    5.40
  -2  -5  -7  378.70   16.99
  -2   5  -7  278.51   23.60
  -2   5  -7  342.29   15.59
  -2   5  -7  358.36   23.38
  -2  -5  -7  333.18   17.93
   2  -5   7  409.36   17.86
  -2  -5  -7  270.98   20.99
  -2  -5  -7  388.44   19.44
   2   5   7  412.19   25.68
   2  -5   7  362.44   19.08
  -2  -5  -8    0.84    1.35
   2   5   8    0.63    1.76
  -2   5  -8    1.12    2.21
  -2   5  -8    1.17    0.91
  -2  -5  -8    0.94    1.57
  -2   5  -8    0.85    1.13
  -2  -5  -8    0.63    1.01
  -2   5  -8    2.49    2.59
  -2  -5  -9  176.12   10.47
   2  -5   9  176.82   10.94
  -2  -5  -9  157.09   10.99
  -2   5  -9  158.62   14.47
  -2   5  -9  173.35    9.08
  -2  -5  -9  185.33   12.33
  -2   5  -9  172.41    9.42
   2   5   9  158.27   15.26
   2  -5   9  191.26   12.49
  -2  -5 -10  114.84    8.08
  -2   5 -10   92.01   14.00
  -2   5 -10  123.55   11.97
  -2  -5 -10  122.05    8.74
  -2   5 -10  115.02    6.86
  -2  -5 -10  115.44    9.19
   2  -5  10  119.70    8.62
  -2   5 -10  112.04    7.01
   2   5  10  104.13   11.64
   2  -5  10  137.74   10.19
  -2  -5 -11  318.83   17.78
  -2  -5 -11  305.84   15.98
   2  -5  11  252.72   14.30
  -2   5 -11  256.78   24.19
  -2   5 -11  284.14   13.02
  -2   5 -11  311.32   19.65
  -2  -5 -11  268.78   13.98
   2  -5  11  333.61   16.96
  -2   5 -12    5.01    1.34
   2  -5  12    6.11    1.87
  -2  -5 -12    6.90    2.06
  -2  -5 -12    8.73    2.61
  -2  -5 -13    2.01    1.41
   2   5  13    1.27    0.88
  -2   5 -13    0.95    0.76
   2   5  13    0.11    0.82
   2  -5  13    1.47    1.31
   2   5  14   92.55    5.72
  -2  -5 -14  108.48    6.26
  -2  -5 -15  124.70    6.84
  -2  -6  15    7.30    1.55
   2   6 -14   83.05    4.78
  -2  -6  14   81.99    5.48
   2   6 -14   81.29    4.66
   2   6 -13   94.56    5.71
   2  -6 -13  108.03    7.37
   2  -6 -13  101.43    7.66
   2   6 -13   91.98    5.65
   2   6 -12  120.09    7.23
   2  -6 -12  127.40    9.41
   2  -6 -12  150.14   10.75
   2   6 -12  128.76    7.43
   2  -6 -12  130.97   10.54
   2  -6 -11    8.54    2.94
   2   6 -11   11.94    3.90
   2   6 -11   10.59    2.05
   2  -6 -11    8.47    3.35
   2   6 -11   11.42    2.21
   2  -6 -11    9.81    2.90
   2   6 -10  238.94   11.31
   2   6 -10  249.20   12.32
   2  -6 -10  225.57   15.17
   2  -6 -10  321.49   20.74
  -2  -6  10  268.30   13.04
   2   6 -10  231.84   11.57
   2   6 -10  230.63   12.21
   2  -6 -10  198.90   14.71
   2   6 -10  172.88   19.25
   2  -6 -10  259.55   12.63
   2   6 -10  234.08   18.61
  -2  -6   9  508.49   22.49
   2   6  -9  470.47   20.45
   2   6  -9  478.64   19.60
  -2  -6   9  527.24   20.98
   2  -6  -9  408.72   23.31
   2  -6  -9  500.40   30.51
   2   6  -9  478.28   19.66
   2   6  -9  436.96   19.49
   2   6  -9  464.17   19.85
   2   6  -9  399.11   30.28
   2  -6  -9  420.04   23.58
   2  -6  -9  531.99   21.22
   2   6  -9  520.66   30.22
  -2  -6   8  369.09   17.48
   2   6  -8  346.64   15.92
   2   6  -8  362.39   15.26
   2  -6  -8  275.79   22.34
  -2  -6   8  352.61   15.72
   2  -6  -8  282.46   17.65
   2   6  -8  335.35   15.11
   2   6  -8  326.13   15.14
   2   6  -8  332.75   15.29
   2   6  -8  275.15   24.00
  -2  -6   8  182.49   20.78
   2  -6  -8  295.56   18.32
   2  -6  -8  341.30   15.93
   2   6  -8  375.74   24.82
  -2  -6   7  223.42   12.16
   2   6  -7  232.28   10.84
  -2  -6   7  225.23   11.01
   2  -6  -7  143.36    9.76
   2  -6  -7  173.04   12.09
   2  -6  -7  185.26   15.85
   2   6  -7  215.86   10.65
   2   6  -7  203.67   10.64
   2   6  -7  210.81   10.76
   2   6  -7  195.12    9.64
   2  -6  -7  194.20   10.89
   2   6  -7  242.06   18.88
   2   6  -7  203.33   18.65
  -2  -6   7  123.25   14.83
   2  -6  -7  202.50   13.59
   2   6  -6   49.10    8.57
   2  -6  -6   63.64    6.83
  -2  -6   6   29.40    6.28
  -2  -6   6   64.40    5.64
   2   6  -6   63.37    4.86
   2  -6  -6   60.59    5.94
   2  -6  -6   57.22    7.17
  -2  -6   6   56.92    4.81
   2   6  -6   55.24    4.33
   2   6  -6   56.31    4.67
  -2  -6   6   54.39    4.77
   2   6  -6   66.96    9.42
   2  -6  -6   50.89    4.83
  -2  -6   6   36.43    6.02
   2  -6  -6   60.55    5.65
  -2  -6   5 1057.23   53.77
   2  -6  -5 1564.52   52.99
   2   6  -5 1499.98   63.16
   2  -6  -5 1474.18   55.16
  -2  -6   5 1127.16   57.74
  -2  -6   5 1446.58   52.46
   2   6  -5 1587.33   51.66
  -2  -6   5 1406.72   51.41
   2  -6  -5 1324.89   54.51
   2  -6  -5 1417.79   52.81
   2   6  -5 1429.28   50.85
   2   6  -5 1379.44   50.09
  -2  -6   5 1424.52   51.53
   2  -6  -5 1409.45   52.06
   2   6  -5 1421.20   61.55
   2  -6  -4  352.76   15.49
  -2  -6   4  297.02   16.42
   2  -6  -4  329.68   15.04
  -2  -6   4  295.57   14.38
  -2  -6   4  296.35   14.02
   2  -6  -4  319.53   14.86
   2  -6  -4  279.71   15.37
  -2  -6   4  311.12   19.77
   2   6  -4  331.72   21.31
   2  -6  -4  355.10   16.94
   2   6  -4  292.54   13.46
   2   6  -4  313.10   13.38
  -2  -6   4  352.01   15.03
  -2  -6   3   50.01    4.37
   2  -6  -3   63.48    4.91
  -2  -6   3   68.53    5.05
  -2  -6   3   58.92    4.29
   2   6  -3   48.87    3.94
   2  -6  -3   64.39    5.85
  -2  -6   3   55.35    5.57
   2  -6  -3   75.02    5.48
  -2  -6   3   39.48    8.30
   2  -6  -3   58.97    4.98
   2  -6  -2   49.86    3.83
   2   6  -2   68.69    8.86
  -2  -6   2   58.13    4.75
   2  -6  -2   61.32    4.98
  -2  -6   2   60.44    4.52
   2   6  -2   61.95    4.46
   2  -6  -2   66.09    5.70
   2  -6  -2   59.55    4.61
   2  -6  -2   64.84    5.10
  -2  -6   2   71.66    5.88
  -2  -6   2   55.11    9.64
   2  -6  -1  300.24   13.97
   2   6  -1  334.54   22.78
  -2  -6   1  372.87   15.55
  -2  -6   1  325.26   15.16
   2  -6  -1  354.73   15.55
   2  -6  -1  364.90   15.01
   2  -6  -1  348.94   15.51
  -2  -6   1  339.56   15.62
  -2  -6   1  317.67   24.49
   2  -6   0   37.35    3.41
  -2  -6   0   45.89    4.29
  -2  -6   0   49.98    4.54
  -2  -6   0   44.18    4.06
   2   6   0   44.87    8.05
  -2   6   0   37.85    6.65
  -2  -6   0   45.65    4.30
  -2  -6   0   59.17    9.78
   2  -6   1    4.29    1.21
  -2  -6  -1    4.90    1.54
   2   6   1    6.59    3.44
  -2   6  -1    2.60    1.91
  -2  -6  -1    4.31    1.54
   2  -6   1    4.63    1.14
  -2  -6  -1    6.02    3.63
  -2  -6  -1    5.01    1.58
  -2  -6  -2   84.55    6.70
   2  -6   2   94.26    5.99
  -2   6  -2   93.44    8.61
  -2  -6  -2   82.96    6.98
   2  -6   2   87.74    5.60
   2   6   2  108.19   12.64
   2  -6   2   92.06    7.96
  -2  -6  -2   89.20   12.24
  -2  -6  -2   98.46    6.96
  -2   6  -3   11.24    3.59
  -2  -6  -3    9.20    2.41
   2   6   3    9.66    4.09
   2  -6   3   18.26    3.66
  -2  -6  -3    5.42    3.59
  -2  -6  -3   13.41    2.67
   2  -6   3   10.70    1.98
  -2  -6  -3    9.31    2.34
  -2  -6  -4  223.95   14.09
   2  -6   4  282.07   13.22
  -2   6  -4  364.58   21.45
  -2   6  -4  194.21   17.09
   2  -6   4  259.54   15.92
  -2  -6  -4  373.06   26.09
   2  -6   4  282.84   13.21
  -2  -6  -4  281.48   15.71
  -2   6  -5  416.80   24.97
   2  -6   5  365.60   16.55
   2  -6   5  361.16   16.49
  -2  -6  -5  382.22   19.69
  -2  -6  -5  436.23   29.37
  -2   6  -6    2.70    1.27
  -2  -6  -6    3.98    1.94
   2   6   6    2.98    2.54
  -2   6  -6    4.29    2.70
  -2   6  -6    1.35    1.63
  -2  -6  -6    2.09    2.06
   2  -6   6    2.46    1.45
  -2   6  -7   35.89    3.73
  -2  -6  -7   52.93    6.47
  -2   6  -7   39.79    7.46
   2   6   7   41.71    8.33
  -2  -6  -7   43.08    5.32
   2  -6   7   42.87    4.72
  -2   6  -7   21.43    6.05
  -2   6  -8  172.54   15.94
  -2  -6  -8  185.07   12.23
  -2   6  -8  181.33    9.50
   2  -6   8  199.98   11.52
  -2  -6  -8  218.36   13.84
  -2   6  -8  185.75   10.23
   2   6   8  219.05   19.07
   2  -6   8  203.08   13.24
  -2  -6  -9  360.12   18.34
  -2   6  -9  360.72   23.08
   2  -6   9  374.95   17.60
  -2  -6  -9  384.72   19.73
  -2   6  -9  339.34   15.58
   2   6   9  383.70   25.41
   2  -6   9  389.53   19.87
  -2   6 -10   19.45    2.53
  -2  -6 -10   20.64    3.36
   2  -6  10   19.63    3.21
  -2  -6 -10   23.33    3.88
   2  -6  10   23.63    4.13
  -2   6 -11   10.94    1.76
  -2  -6 -11   12.01    2.75
   2  -6  11   14.30    2.64
  -2  -6 -11   13.27    2.34
   2  -6  11   15.51    3.16
  -2  -6 -12   88.55    6.50
   2  -6  12   66.10    5.25
   2   6  12   77.49    5.74
   2   6  12   66.50    4.92
   2  -6  12   89.45    6.71
   2  -6  13  107.69    6.51
  -2  -6 -13  123.14    7.22
   2   6  13  113.15    6.14
   2   6  13  130.74    7.17
  -2  -6 -14    1.90    0.96
   2  -7 -14   18.75    2.40
  -2  -7  14   15.59    2.16
   2   7 -13  122.51    6.05
  -2  -7  13  121.98    7.01
   2   7 -13  123.52    6.21
   2  -7 -13  166.83    9.30
  -2  -7  13  177.41    9.77
  -2  -7  12  162.76    9.12
   2   7 -12  137.52    7.36
   2   7 -12  147.83    7.64
   2  -7 -12  160.91   10.76
   2   7 -11  131.06    7.32
   2  -7 -11  128.56    8.79
   2  -7 -11  171.85   12.10
   2   7 -11  131.81    7.48
  -2  -7  11  179.77   14.19
   2  -7 -11  130.83   10.39
   2   7 -10   16.31    2.46
   2  -7 -10   21.25    5.26
   2   7 -10   14.19    2.43
   2   7 -10   14.98    2.14
   2  -7 -10   11.97    2.73
  -2  -7  10   20.39    5.85
   2  -7 -10   12.32    3.32
   2  -7  -9    8.52    2.93
   2   7  -9   15.55    4.72
   2   7  -9   10.58    2.28
   2  -7  -9    4.95    3.77
  -2  -7   9   12.03    2.40
   2   7  -9    9.64    1.90
   2   7  -9    7.76    1.77
   2   7  -9    8.79    2.20
   2  -7  -9    9.41    2.65
  -2  -7   9    9.18    4.20
  -2  -7   8   26.91    3.48
   2  -7  -8   29.18    3.72
   2   7  -8   25.46    6.20
   2   7  -8   19.33    2.57
   2   7  -8   23.67    3.22
  -2  -7   8   26.45    3.30
   2  -7  -8   18.48    5.44
   2   7  -8   21.69    2.89
   2   7  -8   25.04    2.94
   2   7  -8   21.60    2.87
   2  -7  -8   15.61    3.30
  -2  -7   8    8.40    3.98
   2  -7  -8   18.13    4.03
   2  -7  -7   46.65    4.84
   2   7  -7   46.67    8.44
  -2  -7   7   48.55    4.68
   2   7  -7   42.06    3.93
   2  -7  -7   47.50    7.76
  -2  -7   7   51.55    4.66
   2  -7  -7   32.66    4.67
   2   7  -7   47.69    4.44
   2   7  -7   53.89    4.66
   2   7  -7   42.12    4.05
  -2  -7   7   24.65    5.57
   2  -7  -7   38.61    5.71
   2  -7  -6  130.42   10.96
  -2  -7   6  169.10   10.45
   2   7  -6  178.03    9.17
   2  -7  -6  141.02    9.94
  -2  -7   6  160.41    9.25
   2   7  -6  167.46    9.16
   2   7  -6  164.32    8.51
   2  -7  -6  150.81    9.61
   2   7  -6  180.42   16.72
  -2  -7   6  157.36    9.38
   2  -7  -5   38.47    5.33
  -2  -7   5   38.68    4.44
   2   7  -5   44.79    4.11
  -2  -7   5   38.98    4.12
   2  -7  -5   36.66    4.38
   2   7  -5   37.01    3.74
  -2  -7   5   43.83    4.40
   2  -7  -5   38.66    4.37
   2   7  -5   44.74    8.03
  -2  -7   5   28.70    4.96
   2  -7  -5   43.54    4.76
  -2  -7   4   40.11    5.29
   2  -7  -4   40.44    4.62
  -2  -7   4   27.17    7.05
   2  -7  -4   33.94    4.17
   2  -7  -4   34.00    4.00
   2  -7  -4   30.03    4.60
  -2  -7   4   34.54    3.92
   2   7  -4   39.06    3.62
  -2  -7   4   38.29    4.11
   2  -7  -3   36.16    4.73
  -2  -7   3   38.15    4.03
  -2  -7   3   34.81    3.93
   2  -7  -3   38.13    4.29
  -2  -7   3   34.72    3.86
   2   7  -3   31.11    3.37
   2  -7  -3   37.17    3.99
   2  -7  -3   38.37    4.29
   2  -7  -3   34.09    4.10
  -2  -7   3   30.65    4.43
  -2  -7   3   20.03    6.25
   2  -7  -2  243.43   13.43
  -2  -7   2  252.98   11.89
  -2  -7   2  260.41   12.64
   2   7  -2  236.46   11.33
   2   7  -2  252.07   11.44
  -2   7   2  168.88   16.99
   2  -7  -2  190.16   10.28
  -2  -7   2  235.15   12.87
   2  -7  -2  224.82   12.40
   2  -7  -2  256.19   12.86
  -2  -7   2  174.69   19.32
   2  -7  -2  244.14   12.10
   2  -7  -1    8.13    1.65
  -2  -7   1    7.70    1.93
  -2  -7   1    8.50    2.01
  -2   7   1    6.96    3.42
   2   7  -1   10.94    4.37
   2  -7  -1    6.79    1.81
  -2  -7   1   11.68    2.46
  -2  -7   1    8.81    4.43
   2  -7   0    1.31    0.88
  -2  -7   0    1.79    1.14
   2   7   0    0.74    1.78
  -2  -7   0    2.57    1.37
  -2   7   0    2.29    2.26
  -2  -7   0    7.11    4.10
  -2  -7   0    3.23    1.44
   2  -7   0    1.47    1.31
  -2  -7  -1  125.91    8.54
   2  -7   1  109.96    7.10
  -2  -7  -1  127.45    8.88
   2   7   1  128.62   14.94
  -2  -7  -1  119.03    8.16
  -2  -7  -1  112.39    8.13
  -2  -7  -1  110.65   14.95
  -2  -7  -2  484.69   22.08
   2  -7   2  447.23   19.94
  -2   7  -2  534.84   28.79
  -2  -7  -2  443.27   22.11
   2   7   2  552.76   33.37
  -2  -7  -2  444.60   21.24
  -2  -7  -2  427.29   32.12
  -2  -7  -2  550.66   22.57
  -2  -7  -3   59.91   10.88
   2  -7   3   49.69    4.49
  -2  -7  -3   51.80    5.71
   2   7   3   39.50    4.24
   2   7   3   55.29    9.89
  -2  -7  -3   38.75    5.02
  -2   7  -3   48.28    7.72
  -2  -7  -4   89.98   13.27
   2  -7   4   55.05    6.99
   2  -7   4   68.61    5.55
  -2  -7  -4   75.11    7.37
   2   7   4   63.48    5.57
   2   7   4   87.33   12.32
  -2   7  -4   87.53   10.64
  -2  -7  -4   58.03    6.39
  -2  -7  -5   80.76    8.82
   2  -7   5   82.83    6.33
  -2   7  -5   86.64   11.14
   2  -7   5   73.48    8.14
  -2   7  -6  850.98   40.66
  -2   7  -6  713.97   28.25
  -2  -7  -6  678.89   36.03
   2  -7   6  817.15   29.72
   2  -7   6  805.33   30.42
   2   7   6  890.54   45.06
   2  -7   6  697.02   33.32
  -2   7  -7   35.46    3.41
  -2  -7  -7   22.78    5.84
  -2  -7  -7   34.79    7.03
   2  -7   7   34.65    4.02
   2   7   7   50.02    9.31
  -2  -7  -7   41.63    5.29
  -2   7  -7   34.98    6.80
  -2  -7  -8    0.60    2.05
  -2   7  -8    0.92    0.95
   2  -7   8    1.57    1.19
  -2  -7  -8   -0.59    2.16
  -2  -7  -8   -0.28    1.47
   2   7   8    0.72    1.74
  -2   7  -8    1.59    1.95
  -2  -7  -9    3.23    2.49
   2  -7   9    0.95    1.12
   2   7   9    2.99    1.73
  -2   7  -9    0.75    0.86
  -2  -7  -9    0.25    1.19
   2  -7  10  156.74    8.97
  -2  -7 -10  162.99   11.45
   2   7  10  159.73    9.32
  -2   7 -10  131.20    7.18
  -2  -7 -10  158.94    9.33
   2   7  11  122.31    7.42
   2   7  11  118.94    7.05
   2  -7  11  131.17    8.63
  -2  -7 -11  126.45    8.70
   2  -7  11  113.21    6.93
  -2  -7 -11  104.03    7.71
   2   7  12    0.97    0.79
   2  -7  12    1.02    0.75
   2   7  12    1.00    0.82
  -2  -7 -12    0.15    0.80
   2  -7  12    0.47    0.96
  -2  -8  12   19.18    2.16
   2   8 -12   19.55    1.82
   2   8 -11   70.36    4.43
   2   8 -11   73.85    4.35
   2   8 -10  117.25    6.71
   2   8 -10  119.14    6.50
  -2  -8   9    3.57    2.87
   2   8  -9    1.07    0.86
  -2  -8   9    1.55    1.05
   2   8  -9    0.95    0.77
   2   8  -9    3.39    1.02
   2   8  -9    1.64    1.06
   2  -8  -9    0.73    1.60
   2   8  -8   82.19    5.66
   2   8  -8   65.54    4.58
   2   8  -8   79.21    5.14
   2   8  -8   73.85    5.04
  -2  -8   8   73.80    5.64
   2  -8  -8   43.77    6.50
   2  -8  -8   52.00    5.32
  -2  -8   8   27.49    6.51
  -2   8   7    5.31    3.34
   2   8  -7    7.16    3.63
  -2  -8   7    5.39    1.71
   2   8  -7    8.95    2.02
   2   8  -7    5.71    1.54
   2   8  -7    7.44    1.80
   2  -8  -7    2.92    1.58
  -2  -8   7    5.29    3.00
   2  -8  -7    3.24    2.11
   2  -8  -6   86.91    9.46
   2   8  -6  165.03   16.19
  -2  -8   6  151.92    9.09
   2   8  -6  146.04    7.84
  -2  -8   6  139.39    8.58
   2   8  -6  141.26    8.09
   2   8  -6  154.53    8.70
   2   8  -6  139.20    8.22
  -2   8   6  117.80   14.48
   2  -8  -6  112.78    8.44
  -2  -8   6   86.55    9.59
   2  -8  -5   67.02    7.88
   2   8  -5  131.04   14.40
  -2  -8   5  108.58    7.53
   2   8  -5  105.34    6.64
   2   8  -5  105.87    6.90
   2   8  -5  103.30    6.46
  -2   8   5   70.34   11.19
   2  -8  -5   79.51    6.90
  -2  -8   4   62.77    5.60
  -2   8   4   35.20    7.70
   2   8  -4   60.88    4.98
   2   8  -4   63.87    5.06
  -2  -8   4   51.94    5.09
  -2  -8   4   43.01    5.14
   2  -8  -4   54.10    5.51
   2  -8  -4   51.48    6.30
   2  -8  -3   11.56    2.95
  -2  -8   3   12.56    2.59
  -2   8   3    4.78    2.88
   2   8  -3   14.19    2.25
   2   8  -3   14.13    2.44
   2  -8  -3   12.50    2.78
  -2  -8   3   11.36    2.82
   2  -8  -3   12.63    2.84
  -2  -8   3   15.02    2.77
  -2  -8   2  184.49   10.73
  -2  -8   2  183.52   11.12
   2   8  -2  186.88   10.27
  -2   8   2  166.04   16.16
  -2  -8   2  165.73   11.17
   2  -8  -2  202.38   11.64
   2  -8  -2  217.70   12.01
   2   8  -1    9.45    1.94
   2   8  -1    7.96    1.79
   2  -8  -1    9.07    1.78
  -2  -8   1   11.31    2.49
  -2  -8   1    8.74    2.19
  -2  -8   1   10.33    2.36
  -2  -8   1    9.61    2.29
  -2   8   1   11.37    4.01
   2  -8  -1   10.06    2.54
  -2  -8   1   10.85    2.62
   2  -8  -1   11.16    2.66
   2   8   0  319.59   14.88
  -2  -8   0  278.41   14.55
  -2  -8   0  351.97   16.45
   2   8   0  363.58   25.75
  -2  -8   0  348.48   16.62
  -2  -8   0  353.82   17.17
   2  -8   0  333.14   16.57
  -2  -8   0  245.64   23.14
   2  -8   0  277.21   13.98
  -2  -8   0  304.87   15.76
   2   8   1   11.75    4.63
  -2  -8  -1    7.83    2.18
  -2  -8  -1    6.68    2.15
  -2   8  -1    8.03    3.45
  -2  -8  -1    6.78    1.65
   2   8   1    5.88    1.65
  -2  -8  -1    8.74    4.40
  -2  -8  -1   10.98    2.71
   2  -8   1    8.09    2.32
   2  -8   1    8.79    1.91
  -2  -8  -2    5.55    1.88
   2   8   2    7.90    4.54
  -2  -8  -2    6.95    2.28
  -2   8  -2    9.31    3.77
   2   8   2    7.49    1.95
   2  -8   2    5.07    1.62
  -2  -8  -2    2.41    1.79
  -2  -8  -2    4.50    3.32
   2  -8   2    1.83    1.51
   2  -8   3   32.45    3.95
  -2  -8  -3   32.09    4.76
  -2   8  -3   44.65    7.86
   2   8   3   54.53    9.85
  -2  -8  -3   28.91    4.17
  -2  -8  -3   48.60    6.04
   2  -8   4  119.37    7.85
  -2  -8  -4  113.01    9.64
  -2  -8  -4  137.56   11.19
  -2  -8  -4   93.29    8.40
   2   8   4  117.80   14.71
  -2   8  -4  122.77   13.12
  -2  -8  -4   76.95    7.11
  -2   8  -5    0.14    0.93
   2   8   5    0.79    0.82
  -2  -8  -5    1.46    2.03
  -2  -8  -5    1.15    1.11
  -2  -8  -5    3.63    2.02
  -2   8  -5    1.20    1.68
   2   8   5    0.77    2.40
  -2  -8  -5    1.61    2.02
   2  -8   5    3.54    1.59
   2   8   6    3.78    1.45
  -2  -8  -6    7.92    3.61
  -2  -8  -6    2.66    2.14
  -2  -8  -7   10.96    4.26
  -2  -8  -7   11.31    3.75
   2   8   7   10.30    2.11
  -2   8  -7    9.53    1.87
  -2  -8  -7    9.40    2.54
  -2   8  -8  136.37    7.31
   2   8   8  133.56    8.04
  -2  -8  -8  167.45   10.18
  -2  -8  -8  135.05   11.13
  -2  -8  -8  169.73   13.89
  -2  -8  -9   37.04    5.46
  -2   8  -9   23.83    2.31
   2   8   9   34.99    3.66
  -2  -8  -9   37.32    4.06
   2   8   9   32.95    3.34
  -2  -8 -10   14.31    2.80
   2   8  10   14.15    2.18
  -2  -8 -10   13.76    2.10
   2   8  10   13.07    1.95
  -2  -8 -11   15.05    2.20
   2   9 -10   35.17    2.62
  -2  -9  10   37.64    3.58
   2   9  -9   51.14    3.71
   2   9  -9   52.93    3.56
  -2  -9   9   57.67    5.25
   2   9  -8   92.50    5.19
   2   9  -8  107.66    6.24
   2   9  -8   98.54    5.76
  -2  -9   8   91.72    7.40
   2   9  -7   36.80    3.23
   2   9  -7   30.20    2.91
   2   9  -7   30.87    3.25
  -2  -9   7   23.60    3.70
   2   9  -6   87.31    5.81
   2   9  -6   93.10    5.57
   2   9  -6   85.35    5.62
   2   9  -5   26.31    3.04
   2   9  -5   28.32    3.33
   2   9  -5   24.67    3.04
  -2  -9   5   32.14    3.76
   2   9  -4  136.42    7.56
  -2  -9   4  152.35    9.20
   2   9  -4  130.61    7.42
   2   9  -4  146.76    8.17
  -2  -9   4  144.76    8.81
   2   9  -3   -0.15    0.82
   2   9  -3    1.24    1.14
  -2  -9   3    2.40    1.46
  -2  -9   3    0.95    0.99
   2  -9  -3    0.23    1.17
  -2  -9   3    0.49    1.09
  -2  -9   2  186.94   10.97
   2   9  -2  175.17    9.31
   2  -9  -2  202.26   12.01
  -2  -9   2  161.29   10.73
  -2  -9   2  145.13    9.14
   2  -9  -2  173.82   10.81
   2   9  -2  185.58    9.90
  -2  -9   1    2.77    1.64
  -2  -9   1    2.61    1.54
   2  -9  -1    3.61    1.76
   2  -9  -1    2.91    1.69
   2   9  -1    2.36    1.20
   2   9  -1    2.49    1.23
  -2  -9   0   34.64    4.36
   2   9   0   31.92    3.67
   2  -9   0   34.58    4.54
  -2  -9   0   41.01    4.99
   2  -9   0   33.38    4.47
   2   9   1    7.96    1.71
  -2  -9  -1    9.20    2.18
   2  -9   1    9.61    2.04
   2  -9   1    7.58    2.32
   2  -9   1   10.40    2.62
   2   9   1    7.02    1.71
   2   9   2   87.10    6.07
  -2  -9  -2  117.22    9.04
   2  -9   2   84.76    7.56
   2  -9   2  124.77    7.70
  -2  -9  -2   91.59    6.97
  -2  -9  -3    1.85    1.77
   2  -9   3    1.12    1.23
   2   9   3    0.43    0.75
  -2  -9  -4    1.23    1.48
   2  -9   4    0.59    1.01
   2   9   4    0.30    0.87
   2   9   5   23.34    2.99
  -2  -9  -5   27.54    4.39
   2   9   6   49.19    4.25
  -2  -9  -6   56.59    8.53
  -2   9  -6   47.77    3.87
  -2  -9  -7    5.73    3.01
   2   9   7    4.17    1.34
  -2   9  -7    5.95    1.22
  -2  -9  -8   20.66    3.94
   2   9   8   21.20    2.48
   2   9   9   79.62    4.71
  -2 -10   8   41.27    4.15
  -2 -10   7    5.40    1.86
  -2 -10   7    6.31    1.65
   2  10  -7    5.42    1.14
   2  10  -6   10.36    1.52
  -2 -10   6   14.56    2.98
  -2 -10   6   13.56    2.24
   2  10  -5    1.67    0.75
   2  10  -5    1.73    0.90
  -2 -10   5    2.29    1.36
   2  10  -5    1.80    0.92
  -2 -10   5    1.89    1.47
  -2 -10   5    1.22    1.06
  -2 -10   4   32.71    4.24
   2  10  -4   33.26    2.89
   2  10  -4   39.54    3.38
   2  10  -4   39.94    3.20
  -2 -10   3   40.17    4.71
   2  10  -3   43.71    3.58
   2  10  -3   43.51    3.47
  -2 -10   2    1.81    1.54
   2 -10  -2    3.40    1.53
   2  10  -2    3.83    1.18
   2  10  -2    3.55    1.00
  -2 -10   1    7.43    1.97
   2 -10  -1    6.30    2.01
   2  10  -1    5.86    1.31
   2  10   0   25.38    2.70
   2  10   0   24.67    2.50
   2  10   0   19.09    2.12
   2 -10   0   21.68    3.43
   2  10   1   12.54    1.81
   2  10   1   12.47    1.85
   2 -10   1   11.73    2.67
   2 -10   1   13.01    2.89
   2  10   2   13.00    1.90
   2  10   2   14.14    2.05
   2 -10   2   17.61    3.34
   2 -10   2   13.00    2.78
   2 -10   3   41.31    5.01
   2 -10   3   54.01    5.82
   2  10   3   41.47    3.19
   2 -10   4   42.77    5.50
   2 -10   4   39.53    5.02
   2  10   4   52.44    3.64
   2  10   5    3.05    1.03
   2 -10   5    2.93    1.86
   2 -10   5    0.58    1.40
   2  10   5    3.16    0.89
   2 -10   6    2.36    1.61
   2  10   6    0.71    0.68
   2 -10   7  120.78    7.58
   2 -10   8  122.92    6.32
  -3   0  17  131.63    7.66
   3   0 -16    0.29    1.58
   3   0 -16    0.47    1.08
  -3   0  16    2.98    1.41
   3   0 -15    9.42    3.36
   3   0 -15   10.67    2.08
   3   0 -15    8.54    2.19
  -3   0  15   11.36    2.73
  -3   0  14    2.37    1.51
  -3   0  14   -0.78    3.45
   3   0 -14    2.37    1.91
   3   0 -14   -0.19    1.06
   3   0 -14   -0.65    1.54
   3   0 -14   -2.40    5.53
  -3   0  13   43.96    8.92
   3   0 -13   49.44    5.07
   3   0 -13   65.50    5.73
   3   0 -13   59.00    7.27
   3   0 -13   49.20    8.78
   3   0 -13   60.05    5.56
   3   0 -13   57.03    5.36
  -3   0  13   57.27    5.94
   3   0 -13   48.60   11.58
   3   0 -12    1.04    1.54
  -3   0  12    0.72    2.44
   3   0 -12    2.01    2.28
   3   0 -12    4.30    2.18
   3   0 -12    7.81    2.16
   3   0 -12    2.29    1.51
  -3   0  12    4.42    1.71
   3   0 -12    1.09    4.02
  -3   0  11   28.23    6.30
   3   0 -11   36.83    4.17
   3   0 -11   36.60    4.05
   3   0 -11   35.84    5.13
   3   0 -11   27.64    6.32
   3   0 -11   39.47    4.25
  -3   0  11   38.25    3.95
  -3   0  11   37.50    4.32
   3   0 -11   24.16    7.34
   3   0 -10    2.01    1.14
   3   0 -10    0.54    1.03
   3   0 -10   -1.05    1.79
   3   0 -10    1.10    1.21
  -3   0  10   -0.56    1.36
  -3   0  10    0.60    0.91
   3   0  -9  758.10   28.08
   3   0  -9  632.52   33.56
   3   0  -9  700.31   27.34
   3   0  -9  752.53   27.22
  -3   0   9  648.35   26.74
  -3   0   8    1.20    1.25
   3   0  -8    1.96    1.64
   3   0  -8    5.37    1.36
   3   0  -8    1.52    0.95
   3   0  -8    2.78    1.21
   3   0  -8    3.07    1.01
   3   0  -8    3.57    2.71
   3   0  -7  820.38   31.76
   3   0  -7  950.19   32.52
   3   0  -7  890.80   32.26
   3   0  -7  790.43   31.83
  -3   0   7  882.27   38.02
   3   0  -7 1031.61   40.54
   3   0  -7  790.80   36.79
  -3   0   6    1.17    1.29
   3   0  -6    1.01    1.62
   3   0  -6    2.87    1.60
   3   0  -5  825.71   35.36
   3   0  -5  841.50   36.48
   3   0  -5  939.56   39.03
  -3   0   5  923.13   36.15
   3   0  -4    1.90    1.59
   3   0  -4    0.21    0.94
   3   0  -4    0.60    0.88
   3   0  -3 1744.45   66.52
   3   0  -3 1939.11   66.76
  -3   0   2    0.71    0.74
   3   0  -2    0.47    0.77
  -3   0   1 1011.68   28.34
   3   0  -1  994.54   28.94
   3   0   0    5.28    1.47
  -3   0  -1 8684.91  292.08
  -3   0  -2    2.33    1.06
  -3   0  -2    0.79    0.61
  -3   0  -3   22.51    3.36
  -3   0  -3   19.15    2.58
  -3   0  -4    2.11    1.76
   3   0   4    0.46    0.54
  -3   0  -4    0.78    0.99
   3   0   5 1150.56   42.98
   3   0   5 1206.53   49.53
  -3   0  -5 1182.03   50.53
  -3   0  -5 1159.76   45.97
   3   0   5 1213.86   41.91
   3   0   6    1.64    1.06
   3   0   6    1.75    1.92
   3   0   6    2.57    1.18
  -3   0  -6    0.50    1.57
  -3   0  -6    2.07    1.60
   3   0   7  229.32   16.89
   3   0   7  219.26   10.72
  -3   0  -7  188.17    9.47
   3   0   7  207.90   10.96
  -3   0  -7  230.63   14.50
  -3   0  -8    1.27    1.10
   3   0   8    1.18    2.01
   3   0   8    1.00    1.15
   3   0   8    1.03    0.96
  -3   0  -8    1.19    0.86
  -3   0  -8    1.26    1.65
  -3   0  -9   68.95    6.36
   3   0   9   83.16   10.97
   3   0   9   73.23    6.36
  -3   0  -9   78.15    5.54
  -3   0  -9   80.58    9.46
   3   0   9   75.56    5.95
  -3   0 -10    1.03    1.44
   3   0  10    5.63    1.99
  -3   0 -10    1.02    1.12
  -3   0 -10    1.63    2.27
   3   0  10    5.80    1.91
   3   0  11  800.31   33.70
   3   0  11  790.58   30.75
  -3   0 -11  820.00   31.86
  -3   0 -11  817.65   35.65
  -3   0 -11  725.61   42.15
  -3   0 -11  833.64   34.26
   3   0  11  824.47   32.53
   3   0  12    1.55    1.19
  -3   0 -12    0.18    1.12
  -3   0 -12    0.33    1.58
  -3   0 -12    1.06    1.38
  -3   0 -12    0.71    1.71
   3   0  12    2.53    1.41
   3   0  13   33.91    4.40
  -3   0 -13   40.95    5.52
   3   0  13   29.79    3.63
   3   0  14    0.85    1.39
  -3   0 -14    1.35    1.77
   3   0  15  288.03   13.91
  -3   0 -15  303.35   15.18
   3   0  16    0.23    0.69
  -3   0 -16    0.46    0.99
  -3   0 -17   32.93    2.53
  -3   1  17   19.62    2.62
  -3  -1  17   20.38    2.62
   3   1 -17   19.68    2.29
   3  -1 -16  118.93    7.62
   3   1 -16  107.23    6.75
  -3   1  16  106.97    7.41
  -3  -1  16  104.21    7.32
   3   1 -15  275.34   16.53
   3   1 -15  242.51   12.05
   3  -1 -15  275.11   13.67
   3   1 -15  276.03   13.16
  -3  -1  15  226.21   13.42
  -3   1  15  276.67   14.29
  -3  -1  14  278.23   15.39
  -3   1  14  295.28   15.68
   3   1 -14  314.17   14.68
   3   1 -14  294.27   14.36
  -3   1  14  279.31   23.15
  -3  -1  14  289.21   23.50
   3   1 -14  297.57   18.22
   3  -1 -14  277.19   17.74
   3   1 -14  250.55   22.48
   3   1 -14  287.01   13.98
   3   1 -14  333.73   15.03
   3  -1 -14  274.28   14.35
   3  -1 -14  316.93   15.62
   3  -1 -14  244.02   26.24
   3   1 -14  219.65   25.45
   3   1 -13  265.65   13.82
   3   1 -13  288.58   14.14
  -3   1  13  271.59   22.43
  -3  -1  13  264.06   22.13
   3   1 -13  271.41   22.98
   3   1 -13  264.34   17.28
   3  -1 -13  263.36   17.21
   3   1 -13  312.76   14.45
   3  -1 -13  302.54   14.96
   3   1 -13  269.30   13.71
  -3   1  13  278.77   15.13
   3  -1 -13  221.91   24.87
   3   1 -13  239.36   25.88
   3   1 -12  100.43    7.02
   3  -1 -12  103.90    7.73
   3   1 -12  100.24    6.99
  -3   1  12   99.71   12.58
  -3  -1  12   80.40   11.24
   3   1 -12   76.05   11.67
   3  -1 -12   67.98    9.66
   3  -1 -12   98.61    9.07
   3   1 -12   96.96    9.05
   3  -1 -12  112.16    7.97
   3   1 -12   99.38    6.92
  -3  -1  12   98.49    7.19
  -3   1  12   93.28    7.45
  -3  -1  12   85.52    7.21
   3  -1 -12   66.64   13.25
   3   1 -12   84.58   14.61
  -3   1  11  259.50   19.97
   3   1 -11  249.50   12.61
   3  -1 -11  262.72   13.67
  -3  -1  11  244.05   19.51
   3   1 -11  270.62   12.92
   3   1 -11  220.36   19.31
   3   1 -11  239.11   15.08
   3  -1 -11  224.13   14.59
   3  -1 -11  222.59   17.45
   3   1 -11  244.47   11.88
   3  -1 -11  297.43   14.19
  -3  -1  11  237.21   13.07
  -3  -1  11  251.11   12.78
  -3   1  11  258.25   13.49
   3  -1 -11  192.58   21.13
   3   1 -11  196.67   21.48
   3  -1 -10  420.82   18.27
   3   1 -10  376.47   16.18
   3   1 -10  349.23   24.06
   3  -1 -10  361.59   18.85
   3  -1 -10  329.72   21.41
   3   1 -10  382.23   19.31
   3  -1 -10  362.30   17.35
  -3  -1  10  354.43   23.31
   3   1 -10  377.79   16.75
  -3   1  10  363.92   23.64
   3   1 -10  389.56   16.79
  -3  -1  10  371.51   16.77
  -3  -1   9  576.95   23.37
   3   1  -9  545.24   23.18
   3  -1  -9  572.46   24.12
   3  -1  -9  464.99   27.24
   3   1  -9  543.64   30.70
   3   1  -9  573.28   22.91
   3  -1  -9  633.95   24.91
   3  -1  -9  714.40   26.10
   3   1  -9  572.17   22.47
   3  -1  -9  804.73   38.50
  -3  -1   8   16.78    2.32
   3   1  -8   20.90    2.55
   3  -1  -8   26.73    3.43
   3  -1  -8   18.22    2.62
   3   1  -8   19.58    4.53
   3  -1  -8   15.52    3.48
   3  -1  -8   16.97    2.46
   3  -1  -8   22.40    3.33
   3   1  -8   16.35    2.20
   3   1  -8   22.80    2.65
   3  -1  -8   21.88    2.67
   3   1  -8   19.02    2.18
   3  -1  -8   27.26    6.36
  -3  -1   8   17.89    2.13
   3  -1  -7    2.65    1.32
  -3   1   7    2.74    1.58
  -3  -1   7    3.38    1.95
   3   1  -7    3.74    1.19
   3   1  -7   11.43    3.25
   3  -1  -7    4.88    1.92
   3  -1  -7    3.68    1.19
   3   1  -7    4.36    1.19
   3   1  -7    4.88    1.23
   3  -1  -7    3.31    1.22
   3  -1  -7    3.25    1.51
   3  -1  -7    4.16    2.62
   3   1  -7    5.49    2.44
   3   1  -6  147.16   10.82
   3  -1  -6  157.21   13.59
  -3   1   6  132.41    9.77
  -3  -1   6  133.45    9.74
   3   1  -6  120.14    6.53
   3  -1  -6  125.90    8.93
   3   1  -6  151.43   11.01
   3   1  -6  119.20    6.53
   3   1  -6  116.96    6.51
   3   1  -6  128.12    9.06
   3  -1  -6  118.74   11.05
   3   1  -6  146.84   12.03
  -3  -1   5 1944.46   69.95
  -3   1   5 2030.27   70.34
   3   1  -5 1819.08   71.17
   3  -1  -5 1675.86   73.30
   3   1  -5 1834.32   68.99
   3  -1  -5 2037.33   73.66
   3   1  -5 2045.77   73.41
   3  -1  -5 1791.48   68.37
   3  -1  -4  188.64   13.05
   3   1  -4  223.94   13.07
   3   1  -4  188.96   11.46
   3   1  -4  269.05   14.39
   3  -1  -4  265.61   14.38
   3   1  -3   24.84    3.54
   3  -1  -3   34.34    3.77
   3   1  -3   30.36    4.06
   3  -1  -3   32.47    4.16
   3   1  -3   29.29    3.71
   3  -1  -2  132.09    8.44
   3   1  -2  149.49    8.89
  -3   1   2  140.19    6.84
   3  -1  -1 2115.66   74.48
   3   1  -1 2187.04   74.52
   3   1  -1 2200.33   75.75
   3  -1  -1 2190.70   75.62
  -3   1   1 2003.82   72.63
   3   1   0    6.08    1.55
   3  -1   0    6.07    1.49
   3  -1   1  170.56    9.35
  -3   1  -1  129.62    6.50
   3   1   1  165.42    8.96
   3   1   1  166.72    9.27
  -3  -1  -1  148.48    8.72
  -3   1  -1  133.24    6.22
   3   1   2   28.77    3.30
  -3   1  -2   25.24    2.65
  -3  -1  -2   30.90    3.82
   3   1   3  973.73   34.49
  -3  -1  -3  971.17   37.09
  -3  -1  -3  960.00   38.29
  -3   1  -3  924.99   37.73
  -3   1  -4  960.07   38.20
  -3  -1  -4  967.11   42.70
  -3   1  -4 1019.20   42.88
   3   1   4 1017.82   38.29
  -3  -1  -4 1090.06   42.40
  -3  -1  -5  349.12   19.09
  -3  -1  -5  265.68   18.41
  -3   1  -5  309.42   19.33
   3   1   5  362.05   19.48
   3  -1   5  294.29   17.93
   3   1   5  329.15   13.88
   3  -1   5  290.35   13.43
   3   1   5  328.64   15.13
   3  -1   5  298.85   13.48
  -3   1  -5  306.46   15.42
  -3   1  -6  129.23   12.60
   3  -1   6  124.03    7.49
   3   1   6  133.26    7.72
   3   1   6  140.60   11.98
   3   1   6  142.05    7.33
  -3  -1  -6  120.22    6.87
   3   1   6  126.63    8.28
  -3   1  -6  149.57    9.83
   3  -1   6  120.69    7.36
   3  -1   7  392.94   17.02
   3   1   7  391.59   17.06
   3   1   7  426.71   24.31
   3  -1   7  325.77   21.98
  -3   1  -7  343.05   14.90
   3   1   7  394.85   16.29
  -3   1  -7  354.21   14.94
   3   1   7  392.43   17.63
  -3  -1  -7  349.95   15.72
   3  -1   7  389.84   16.74
  -3   1  -7  424.18   20.57
  -3   1  -8  105.23    7.86
   3   1   8  107.58    7.65
   3  -1   8  134.65    8.32
   3   1   8  124.47   12.71
   3  -1   8  149.16   13.91
  -3   1  -8  102.84    6.29
   3  -1   8  130.26    7.90
   3   1   8  111.44    7.17
  -3   1  -8  110.14    6.38
  -3  -1  -8  116.50    7.16
  -3   1  -8  132.38   10.75
  -3   1  -9 1150.30   46.23
   3   1   9 1243.77   46.05
   3  -1   9 1163.61   45.78
   3   1   9 1234.47   56.41
   3  -1   9 1170.36   55.95
  -3   1  -9 1145.88   43.35
  -3   1  -9 1190.99   43.48
   3   1   9 1139.26   42.82
  -3  -1  -9 1198.61   44.47
   3  -1   9 1179.44   45.13
   3   1   9 1275.77   44.93
  -3   1  -9 1397.01   52.79
  -3   1 -10    0.31    1.28
  -3  -1 -10    0.31    1.31
  -3   1 -10    0.80    1.38
   3   1  10    1.11    1.26
   3  -1  10    3.97    1.67
   3   1  10   -1.43    1.49
   3  -1  10    0.49    1.51
  -3   1 -10    2.29    1.20
  -3  -1 -10    0.19    1.07
  -3   1 -10    1.49    1.83
  -3  -1 -11   46.10    8.25
  -3   1 -11   41.62    8.69
  -3  -1 -11   53.52    6.40
  -3   1 -11   55.08    6.36
  -3   1 -11   53.33    5.82
   3   1  11   47.57    4.70
   3  -1  11   50.01    5.01
   3   1  11   41.97    5.09
  -3  -1 -11   42.71    4.44
  -3   1 -11   54.38    4.62
  -3   1 -11   60.85    8.50
   3   1  12  425.32   19.13
   3   1  12  450.18   21.40
  -3   1 -12  485.15   19.77
  -3  -1 -12  416.06   27.72
  -3   1 -12  484.24   23.42
  -3  -1 -12  457.04   23.15
  -3   1 -12  451.18   30.44
   3  -1  12  478.26   20.73
   3  -1  13  516.87   24.36
   3   1  13  591.06   25.04
   3   1  13  532.93   22.04
  -3   1 -13  582.37   22.85
  -3   1 -13  630.86   27.03
   3  -1  13  551.96   23.50
   3  -1  14    4.43    1.85
  -3   1 -14    3.41    2.07
   3  -1  14    3.27    1.35
   3  -1  15   34.58    3.70
   3   1  15   43.51    4.06
  -3   1 -15   43.26    4.54
   3   1  15   33.44    3.20
   3  -1  16   89.55    5.43
   3   1  16   81.50    5.25
  -3   1 -16  102.36    6.22
  -3  -1 -16   95.71    6.14
   3  -1  16   92.80    5.29
  -3   2  17  117.48    6.53
  -3  -2  17  103.43    6.20
   3   2 -17  107.90    5.95
   3  -2 -17  122.13    6.42
  -3   2  16   16.35    2.61
  -3  -2  16   13.86    2.34
  -3  -2  16   16.88    2.44
   3   2 -16   16.30    2.35
   3  -2 -16   19.60    3.09
   3   2 -15  471.44   19.28
   3   2 -15  432.40   18.31
   3   2 -15  459.35   22.70
   3  -2 -15  473.62   22.97
   3   2 -15  425.71   18.79
  -3  -2  15  430.36   19.96
  -3   2  15  456.77   20.47
  -3  -2  14   30.65    4.07
  -3   2  14   37.58    4.54
   3   2 -14   43.90    4.17
  -3  -2  14   35.90    7.80
   3   2 -14   31.84    3.71
  -3   2  14   37.73    8.19
   3   2 -14   43.07    5.95
   3  -2 -14   36.05    5.44
   3   2 -14   36.81    8.71
   3   2 -14   32.87    3.60
   3   2 -14   33.88    3.78
   3  -2 -14   16.42    7.86
   3   2 -14   20.86    8.31
   3   2 -14   34.78    6.85
   3   2 -13  204.44   11.21
  -3  -2  13  193.46   18.37
   3   2 -13  220.57   11.42
  -3   2  13  236.98   20.30
  -3  -2  13  201.94   12.12
  -3   2  13  228.88   12.90
   3   2 -13  229.84   11.52
   3   2 -13  208.93   20.69
   3   2 -13  204.23   14.34
   3  -2 -13  212.64   14.56
   3   2 -13  151.76   20.42
   3  -2 -13  176.45   21.56
  -3   2  12   35.12    7.55
  -3  -2  12   35.43    7.49
   3   2 -12   36.30    3.93
   3   2 -12   40.04    4.06
  -3  -2  12   41.84    4.60
  -3   2  12   43.95    4.82
  -3  -2  12   35.84    4.43
   3   2 -12   37.76    3.63
   3  -2 -12   42.27    4.83
   3   2 -12   42.68    4.20
   3   2 -12   35.63    5.51
   3  -2 -12   24.41    4.64
   3   2 -12   37.54    8.46
   3  -2 -12   26.28    8.11
   3   2 -12   24.81    8.18
   3   2 -11 1191.71   42.75
  -3  -2  11 1087.19   52.36
  -3   2  11 1166.50   53.85
   3   2 -11 1124.35   42.45
  -3  -2  11 1179.33   43.76
  -3   2  11 1171.21   43.86
  -3  -2  11 1071.85   43.16
   3   2 -11 1113.10   41.53
   3  -2 -11 1341.31   45.65
   3   2 -11 1133.92   42.35
   3  -2 -11  931.16   56.48
   3   2 -11  879.12   56.12
   3   2 -11 1077.95   55.50
   3  -2 -11 1082.83   45.95
   3   2 -11 1100.01   46.21
   3  -2 -10  188.91   12.29
   3   2 -10  207.19   18.21
   3   2 -10  208.43   12.78
  -3  -2  10  208.12   11.12
  -3  -2  10  185.96   10.63
  -3   2  10  198.22   11.01
   3   2 -10  208.04   10.49
   3   2 -10  189.95   10.24
  -3  -2  10  182.57   15.66
  -3   2  10  188.72   16.06
   3  -2 -10  236.60   12.70
   3   2 -10  204.80    9.87
   3  -2 -10  233.91   13.99
   3   2 -10  132.16   16.79
   3  -2 -10  146.60   17.24
   3  -2  -9   56.85    9.69
   3   2  -9   68.02   10.82
   3  -2  -9   72.37    6.54
   3   2  -9   77.72   10.15
   3   2  -9   81.55    6.97
  -3  -2   9   74.44    5.73
   3   2  -9   74.18    5.42
   3   2  -9   79.80    5.57
  -3   2   9   74.13    9.05
  -3  -2   9   90.05    9.59
  -3  -2   9   91.00    5.38
   3  -2  -9   94.71    7.44
   3   2  -9   73.37    5.01
   3   2  -9   73.40    5.33
   3  -2  -9   98.21    8.57
  -3  -2   9   79.95    5.36
   3   2  -8  536.73   31.68
   3  -2  -8  528.98   31.23
  -3  -2   8  573.35   22.39
   3   2  -8  518.75   21.73
   3   2  -8  532.01   21.72
  -3  -2   8  551.89   20.86
   3   2  -8  518.18   21.59
   3   2  -8  545.25   21.69
   3  -2  -8  603.29   27.21
  -3  -2   8  526.40   21.30
  -3  -2   7  321.25   13.31
   3   2  -7  325.42   19.39
   3   2  -7  310.26   13.61
  -3   2   7  371.52   19.09
   3  -2  -7  324.65   15.81
  -3  -2   7  312.92   17.90
  -3  -2   7  321.35   12.87
   3   2  -7  308.86   13.59
   3   2  -7  308.31   13.64
   3   2  -7  308.04   13.69
   3   2  -7  305.77   13.85
   3  -2  -7  283.60   17.17
   3   2  -7  325.69   16.74
   3  -2  -7  330.14   21.55
   3   2  -7  330.12   21.62
   3   2  -6   30.50    5.46
   3  -2  -6   33.99    5.82
  -3  -2   6   29.37    2.82
   3   2  -6   23.12    2.44
  -3   2   6   28.83    4.30
  -3  -2   6   30.13    4.36
   3  -2  -6   26.82    3.80
   3   2  -6   31.29    5.18
   3   2  -6   25.30    2.56
   3  -2  -6   35.95    5.26
   3   2  -6   24.88    2.54
   3   2  -6   21.96    2.52
   3   2  -6   27.41    4.00
   3  -2  -6   17.11    3.35
   3   2  -6   27.91    4.85
  -3   2   5  521.84   23.43
  -3  -2   5  505.38   23.00
   3   2  -5  525.13   25.07
   3   2  -5  464.81   22.35
   3   2  -5  526.48   25.72
   3  -2  -5  533.41   25.80
   3   2  -5  526.33   25.40
   3   2  -4 1436.46   55.17
   3  -2  -4 1422.05   54.93
   3   2  -4 1544.14   55.75
   3  -2  -3  434.73   20.15
   3   2  -3  447.47   20.47
   3   2  -3  478.85   21.23
   3  -2  -2 1471.27   54.81
   3   2  -2 1617.54   55.55
  -3   2   2 1461.67   50.76
   3   2  -1   11.79    1.95
   3  -2  -1   14.54    2.21
   3   2  -1    9.33    2.42
   3   2   0  573.40   23.86
   3  -2   0  632.61   24.26
   3   2   1  340.33   16.06
   3  -2   1  380.15   16.56
  -3  -2  -1  317.15   17.07
   3   2   1  346.23   17.20
  -3   2  -2  991.76   37.53
   3   2   2 1012.73   39.91
  -3  -2  -2 1019.50   41.29
  -3   2  -3  825.31   33.77
   3   2   3  864.91   34.97
  -3  -2  -3  908.56   37.33
  -3  -2  -3  830.87   36.51
  -3   2  -3  861.69   36.58
  -3   2  -4   48.30    5.27
   3   2   4   49.61    5.38
  -3  -2  -4   51.10    6.50
  -3  -2  -4   52.67    6.60
  -3   2  -4   48.54    6.26
  -3  -2  -5  540.03   26.79
  -3  -2  -5  516.31   27.21
  -3   2  -5  517.76   26.96
   3   2   5  505.42   20.28
   3  -2   5  485.05   19.98
   3   2   5  519.85   23.71
  -3   2  -5  452.52   22.88
   3   2   6  911.37   34.42
   3  -2   6  967.39   34.39
  -3   2  -6  840.92   32.43
   3   2   6  969.23   38.47
  -3   2  -6  914.63   37.88
   3  -2   7 1001.62   37.01
   3   2   7 1033.10   37.36
  -3   2  -7  890.40   34.58
  -3   2  -7  925.79   34.86
   3   2   7 1120.85   41.52
  -3   2  -7 1050.01   41.41
  -3  -2  -8    5.20    1.66
  -3   2  -8    5.03    1.69
   3  -2   8    5.47    1.81
   3   2   8    4.75    1.71
  -3   2  -8    6.51    1.46
   3  -2   8    7.76    2.10
  -3   2  -8    4.82    1.28
   3   2   8   10.05    2.77
  -3   2  -8    5.79    2.42
   3   2   9  253.23   12.97
   3  -2   9  242.08   12.74
  -3   2  -9  211.47   10.40
   3  -2   9  238.40   12.62
  -3   2  -9  219.74   10.50
  -3  -2  -9  211.67   12.28
  -3   2  -9  188.93   11.96
  -3   2  -9  253.10   16.28
   3  -2  10  246.82   13.36
   3   2  10  247.39   13.36
  -3   2 -10  231.51   11.29
  -3   2 -10  253.94   11.57
  -3   2 -10  258.28   17.46
  -3  -2 -10  238.72   13.41
  -3  -2 -10  221.87   17.90
  -3   2 -10  251.63   22.09
  -3   2 -10  215.91   14.13
  -3   2 -10  209.52   13.01
  -3  -2 -10  238.35   14.80
   3  -2  10  248.01   13.32
  -3  -2 -11   80.51    7.12
  -3   2 -11   81.87   12.44
  -3   2 -11   86.11    8.17
  -3  -2 -11   91.46    8.43
   3  -2  11   83.22    6.98
   3  -2  11   91.63    7.36
   3   2  11  102.43    7.63
  -3   2 -11   83.57    5.83
   3   2  11   88.23    5.59
  -3   2 -11   93.85   10.28
   3   2  12   26.43    3.74
   3  -2  12   25.11    3.74
  -3   2 -12   24.78    3.07
  -3   2 -12   19.39    3.95
  -3  -2 -12   29.21    4.71
  -3  -2 -12   28.23    4.00
  -3   2 -12   23.67    6.68
   3  -2  12   26.19    3.71
  -3  -2 -12   31.26    3.97
   3  -2  13  100.29    7.55
   3   2  13  115.27    7.96
   3   2  13   99.10    6.70
  -3   2 -13  111.79    6.67
  -3  -2 -13  127.96    9.54
  -3   2 -13  112.66    8.95
  -3  -2 -13  100.14    7.67
  -3  -2 -13  110.79    7.35
   3  -2  13  101.05    7.31
   3  -2  14   16.90    2.76
   3   2  14   16.88    2.83
  -3  -2 -14   19.61    3.50
  -3   2 -14   16.23    3.39
   3  -2  14   18.08    2.64
  -3  -2 -14   18.73    2.53
   3   2  15  110.62    6.69
  -3   2 -15  127.53    7.86
  -3  -2 -15  118.68    7.68
  -3   2 -16   26.47    2.77
  -3  -2 -16   27.08    2.80
   3  -2  16   29.19    2.62
   3   3 -17    1.46    0.71
   3  -3 -17    1.46    0.91
   3  -3 -17    1.48    0.86
  -3   3  16   12.02    2.09
  -3  -3  16   12.48    2.10
  -3  -3  16   15.18    2.29
   3   3 -16   14.86    2.08
   3  -3 -16   13.80    2.63
   3   3 -15    5.02    1.44
   3   3 -15    5.70    1.53
  -3   3  15    6.51    1.91
  -3  -3  15    5.25    1.70
   3   3 -14   33.81    3.59
   3   3 -14   38.18    3.82
   3  -3 -14   32.51    5.11
   3   3 -14   31.09    4.93
   3   3 -14   37.01    3.61
   3   3 -14   33.09    3.60
  -3  -3  14   37.27    4.33
  -3   3  14   32.69    4.23
   3   3 -14   39.29    6.74
   3   3 -13    9.20    5.87
   3  -3 -13    1.04    3.83
  -3  -3  13    6.11    1.93
  -3   3  13    7.35    2.17
   3   3 -13    7.84    1.95
  -3  -3  13    3.39    3.54
  -3   3  13    8.08    4.91
   3  -3 -13   10.05    3.02
   3   3 -13    8.18    4.39
   3   3 -13    6.77    2.72
   3   3 -13    9.20    2.09
   3   3 -13    5.48    1.76
   3   3 -13    7.09    3.49
   3   3 -12  270.11   13.08
   3   3 -12  274.22   13.14
  -3   3  12  293.92   22.62
  -3  -3  12  255.84   20.70
  -3  -3  12  256.98   13.86
  -3   3  12  277.73   14.54
  -3  -3  12  253.45   14.14
   3   3 -12  280.53   13.14
   3  -3 -12  219.77   23.19
   3  -3 -12  264.51   15.99
   3   3 -12  241.44   15.45
   3   3 -12  253.51   23.28
   3   3 -11    3.46    1.86
   3  -3 -11    3.40    1.83
  -3  -3  11    6.12    2.12
  -3   3  11    5.44    1.76
  -3  -3  11    4.84    1.58
  -3  -3  11    3.07    2.57
  -3   3  11    3.31    2.61
   3   3 -11    3.05    1.46
   3   3 -11    4.23    1.55
   3   3 -11    3.32    1.23
   3   3 -11    4.54    1.63
   3  -3 -11    3.69    3.14
   3   3 -11    3.78    3.48
  -3  -3  10  129.67    8.12
  -3  -3  10  130.59    8.41
  -3   3  10  127.04    8.26
   3   3 -10  113.37    7.30
   3   3 -10  123.63    7.63
  -3  -3  10  120.03   12.29
  -3   3  10  106.04   12.17
  -3  -3  10  146.22    7.97
   3   3 -10  122.23    7.61
   3  -3 -10  127.11    9.58
   3   3 -10  123.37    6.99
   3   3 -10  128.23    7.52
   3   3 -10   80.96   12.92
   3  -3 -10   80.99   12.40
   3   3 -10  115.82    9.30
   3  -3 -10  108.17    8.86
   3   3  -9  178.85   11.27
   3  -3  -9  175.43   11.08
   3   3  -9  189.49   17.13
  -3  -3   9  184.54   10.27
  -3   3   9  194.22   10.21
  -3  -3   9  175.63    9.66
   3   3  -9  168.88    9.50
  -3   3   9  195.63   15.41
  -3  -3   9  174.77   14.30
   3   3  -9  172.98    9.36
  -3  -3   9  200.68    9.34
   3   3  -9  168.30    9.25
   3   3  -9  169.06    9.16
   3  -3  -9  200.78   12.78
  -3  -3   9  187.74    9.63
   3  -3  -9  139.33   15.43
   3   3  -9  130.45   15.49
   3  -3  -8  150.57   14.80
   3   3  -8  131.58   14.38
   3   3  -8  175.88   15.57
  -3  -3   8  173.71    9.35
   3   3  -8  160.36    8.66
   3   3  -8  169.35    8.97
  -3   3   8  165.72   13.36
  -3  -3   8  159.85   12.84
  -3  -3   8  159.76    8.12
   3   3  -8  154.62    8.53
   3   3  -8  167.47    8.77
   3   3  -8  170.35    8.76
   3  -3  -8  194.30   13.13
   3   3  -8  174.07   11.27
   3  -3  -8  151.75    7.75
  -3  -3   8  167.77    8.69
   3  -3  -7  119.95   11.98
   3   3  -7  105.45   11.50
   3   3  -7  104.60   11.11
  -3  -3   7  109.17    6.64
   3   3  -7  102.64    6.21
  -3  -3   7  103.53    5.81
   3   3  -7  102.24    6.26
   3  -3  -7  132.02   11.21
   3   3  -7   99.46    6.15
   3   3  -7   97.01    6.19
   3   3  -7  109.38    8.45
  -3  -3   7  113.63    6.36
   3  -3  -7  101.70    5.68
   3   3  -6  895.03   38.64
   3  -3  -6  782.10   28.96
   3   3  -6  924.72   38.03
   3   3  -6  801.34   29.54
  -3  -3   6  821.62   34.16
  -3   3   6  908.39   35.22
  -3  -3   6  818.79   29.04
   3   3  -6  769.46   29.49
   3   3  -6  755.39   29.47
   3   3  -6  732.05   29.52
   3   3  -6  741.13   28.99
   3   3  -6  820.18   33.41
   3  -3  -6  842.50   37.73
   3   3  -6  828.98   38.01
   3   3  -5  823.71   35.25
   3   3  -5  726.33   27.44
  -3   3   5  827.41   32.19
  -3  -3   5  757.50   31.37
  -3  -3   5  747.12   27.92
   3   3  -5  650.90   27.11
   3  -3  -5  745.11   33.62
   3   3  -5  809.09   34.57
   3   3  -5  775.53   33.92
  -3  -3   5  771.21   27.74
   3   3  -4 2188.73   76.07
  -3  -3   4 2242.35   75.72
  -3   3   4 2142.31   72.19
  -3  -3   4 1954.79   71.23
  -3  -3   4 1937.02   68.47
   3   3  -4 1989.76   73.87
  -3  -3   4 2057.89   68.35
   3   3  -4 2140.20   74.57
   3  -3  -4 1967.20   73.23
   3   3  -4 1717.74   67.84
   3   3  -3   40.79    5.10
  -3  -3   3   37.81    4.81
   3  -3  -3   30.19    4.02
   3   3  -3   33.36    4.28
   3   3  -3   30.78    4.15
  -3  -3   2  152.78   10.02
   3   3  -2  144.18   10.57
  -3  -3   1  565.24   24.10
   3   3  -1  486.71   24.93
   3   3   0 1257.05   46.26
   3   3   0 1185.74   50.22
   3  -3   0 1311.11   46.47
  -3  -3  -1  134.82   10.60
   3  -3   1  132.43    8.13
   3   3   1  137.98    8.23
  -3   3  -2   16.52    3.20
  -3  -3  -2   14.75    3.05
   3  -3   2   19.26    3.16
  -3   3  -2   16.57    2.69
   3   3   2   18.32    3.70
   3   3   2   14.60    2.84
  -3  -3  -2   19.73    4.06
   3  -3   3   70.26    4.59
  -3  -3  -3   80.74    5.44
  -3   3  -3   85.82    6.93
  -3   3  -3   80.83    7.64
  -3  -3  -3   79.03    7.76
   3   3   3   89.17    8.20
  -3  -3  -3   96.48    9.36
  -3  -3  -4 1794.53   66.42
  -3   3  -4 1873.47   70.42
  -3  -3  -4 1807.24   72.80
  -3   3  -4 1900.66   72.90
   3   3   4 1999.71   72.40
  -3  -3  -4 1992.44   75.25
  -3  -3  -5  478.06   26.46
  -3  -3  -5  410.92   19.24
   3  -3   5  446.63   18.72
   3   3   5  500.72   19.19
   3   3   5  495.56   24.46
  -3   3  -5  435.70   22.77
  -3  -3  -6  402.47   23.87
  -3  -3  -6  351.80   16.40
  -3   3  -6  311.91   14.34
   3   3   6  375.07   20.82
  -3   3  -6  356.30   19.73
   3  -3   6  398.78   16.06
   3   3   6  353.27   15.81
  -3  -3  -7    5.57    1.64
   3   3   7    5.32    1.64
   3  -3   7    3.90    1.39
  -3   3  -7    3.84    1.12
   3   3   7    6.63    2.52
  -3   3  -7    7.43    2.64
  -3  -3  -8  700.03   28.86
   3  -3   8  766.28   28.92
   3   3   8  773.26   29.17
  -3   3  -8  644.75   26.09
  -3   3  -8  657.82   26.36
   3   3   8  730.74   33.97
  -3   3  -8  755.95   33.57
   3  -3   9   10.02    2.40
   3   3   9   14.28    2.91
  -3   3  -9    8.87    1.71
  -3   3  -9   12.05    1.95
  -3   3  -9   13.10    3.67
   3   3   9   14.79    3.77
  -3  -3  -9   12.04    2.67
  -3   3  -9    5.30    3.71
  -3   3  -9   10.21    2.92
  -3  -3  -9   11.36    3.08
  -3  -3  -9    9.10    2.41
   3  -3   9    8.91    2.59
  -3   3 -10    1.87    1.74
  -3  -3 -10    1.91    1.72
  -3  -3 -10    5.77    2.01
  -3   3 -10   10.04    4.92
   3   3  10    5.10    1.96
   3  -3  10    1.81    1.41
  -3   3 -10    3.72    1.26
  -3  -3 -10    6.34    1.97
  -3   3 -10    3.96    2.21
  -3  -3 -10    3.47    1.73
   3  -3  10    2.18    1.66
  -3   3 -11    0.64    1.71
  -3  -3 -11    1.61    1.49
  -3  -3 -11   -0.24    1.12
   3  -3  11    0.24    1.34
  -3  -3 -11    0.49    1.22
   3  -3  11    0.92    1.36
   3   3  11   -0.23    1.35
  -3   3 -11    1.66    1.04
   3   3  11    0.16    0.84
  -3   3 -11    0.92    1.44
  -3  -3 -11    0.20    0.87
   3  -3  12   55.59    5.24
   3   3  12   43.71    4.88
  -3   3 -12   47.93    4.07
   3   3  12   39.11    3.62
   3  -3  12   49.16    5.15
  -3  -3 -12   54.84    5.31
  -3   3 -12   47.46    5.74
  -3  -3 -12   44.62    5.72
  -3  -3 -12   53.84    5.33
  -3  -3 -13    3.11    1.50
   3  -3  13    6.24    2.04
  -3   3 -13    6.17    2.28
  -3  -3 -13    5.23    1.86
  -3  -3 -13    6.50    2.39
   3   3  13    6.40    1.92
   3  -3  13    4.27    1.62
   3   3  13    5.57    1.75
   3  -3  14  266.67   12.96
  -3  -3 -14  287.71   12.68
  -3   3 -14  308.86   14.72
  -3  -3 -14  308.03   14.73
   3   3  14  278.65   13.08
   3  -3  14  259.25   12.70
   3   3  14  259.80   12.27
  -3  -3 -15   55.55    4.36
   3   3  15   48.45    3.70
  -3   3 -15   50.31    4.23
   3  -4 -17    0.32    0.58
   3   4 -16  233.17   10.63
   3  -4 -16  258.24   11.86
  -3  -4  16  240.10   11.18
   3   4 -15  260.55   11.91
   3  -4 -15  278.82   13.16
   3   4 -15  248.85   11.80
   3   4 -14    6.73    1.72
   3  -4 -14    8.65    2.76
   3   4 -14    6.58    1.47
   3   4 -14    8.46    1.70
   3   4 -14    6.40    1.62
  -3   4  14    4.91    1.70
   3   4 -13   97.04    6.53
  -3   4  13  105.04    7.43
  -3  -4  13   97.02    7.23
   3   4 -13  107.90   11.23
   3   4 -13  103.07    6.76
   3   4 -13   97.90    6.48
  -3  -4  12  817.28   32.83
  -3   4  12  795.66   32.23
  -3  -4  12  781.46   32.12
   3   4 -12  789.47   30.84
  -3  -4  12  763.24   41.56
   3   4 -12  776.41   30.82
   3   4 -12  814.08   30.97
   3   4 -12  818.10   47.14
  -3  -4  11  358.94   16.93
  -3  -4  11  379.42   17.44
  -3   4  11  359.57   16.92
   3   4 -11  378.13   16.11
   3   4 -11  352.67   15.90
  -3   4  11  385.41   25.42
  -3  -4  11  375.23   25.12
   3   4 -11  349.91   15.89
   3  -4 -11  236.64   23.65
   3   4 -11  228.44   22.95
   3   4 -11  310.30   26.44
   3  -4 -11  297.76   17.30
   3   4 -11  292.96   17.02
   3   4 -10  228.50   21.26
   3  -4 -10  199.07   12.95
  -3   4  10  243.01   12.75
  -3  -4  10  248.71   13.04
  -3  -4  10  244.14   12.79
   3   4 -10  246.57   12.06
  -3  -4  10  258.73   19.54
   3   4 -10  235.00   12.09
  -3   4  10  269.22   19.73
  -3  -4  10  275.57   12.46
   3   4 -10  223.18   11.61
   3   4 -10  245.28   11.25
   3   4 -10  240.00   12.29
   3   4 -10  140.64   17.16
   3  -4 -10  160.83   18.05
  -3  -4  10  246.59   12.50
   3   4  -9   79.74   11.75
   3  -4  -9   72.24    6.69
  -3  -4   9   89.21    6.44
  -3   4   9   93.46    6.56
   3   4  -9   80.42    6.02
  -3   4   9   77.52    9.77
   3   4  -9   87.61    6.06
  -3  -4   9   85.26   10.22
  -3  -4   9   91.96    5.91
   3   4  -9   65.63    5.71
   3   4  -9   78.45    5.77
   3   4  -9   79.78    5.74
   3   4  -9   75.83    5.67
   3  -4  -9   89.71    5.59
  -3  -4   9   93.76    6.39
   3  -4  -9   58.77    9.72
   3   4  -9   57.99    9.76
   3  -4  -8  791.68   44.70
   3   4  -8  763.07   44.63
   3   4  -8  936.32   48.06
  -3   4   8 1011.81   36.86
  -3  -4   8 1000.04   36.82
  -3  -4   8 1042.31   44.71
   3   4  -8  966.55   36.90
  -3   4   8 1007.20   44.32
   3   4  -8 1014.25   36.69
  -3  -4   8  996.38   36.15
   3   4  -8  978.66   36.47
   3   4  -8  940.80   36.49
   3   4  -8  896.49   36.26
   3   4  -8 1003.85   40.40
  -3  -4   8 1030.38   36.99
   3  -4  -8  945.88   35.75
   3  -4  -7   18.95    4.85
   3   4  -7   17.35    4.61
   3   4  -7   22.87    5.53
  -3  -4   7   19.99    2.54
  -3  -4   7   17.33    2.59
  -3   4   7   20.91    4.26
  -3  -4   7   21.91    4.33
   3   4  -7   18.81    2.50
  -3  -4   7   19.69    2.42
   3   4  -7   18.28    2.53
   3   4  -7   18.14    2.30
   3   4  -7   17.48    2.49
   3   4  -7   16.88    2.48
   3   4  -7   19.36    3.59
  -3  -4   7   21.58    2.66
   3  -4  -7   19.74    2.40
   3   4  -6  366.01   22.73
  -3  -4   6  354.12   22.31
   3  -4  -6  345.58   14.80
   3   4  -6  356.31   21.99
  -3   4   6  365.32   19.26
   3   4  -6  371.97   15.23
  -3  -4   6  377.40   19.52
   3   4  -6  349.42   15.04
   3   4  -6  344.65   14.69
   3  -4  -6  319.49   20.41
   3   4  -6  309.50   20.09
   3   4  -6  338.19   14.20
  -3  -4   6  352.52   14.78
   3   4  -5  104.19   10.18
  -3  -4   5   82.40    9.06
   3  -4  -5   77.82    5.06
   3   4  -5   91.00    9.06
  -3  -4   5   84.77    5.41
   3  -4  -5   74.82    5.17
   3   4  -5   88.67    5.25
   3   4  -5   77.05    4.63
   3   4  -5   77.53    4.81
   3   4  -5   61.22    7.26
   3  -4  -5   66.84    7.48
   3   4  -4  397.37   20.41
   3  -4  -4  424.01   20.81
  -3  -4   4  483.59   24.16
   3   4  -4  512.86   24.74
  -3  -4   4  463.08   18.12
  -3  -4   4  420.91   19.51
  -3   4   4  452.95   19.85
   3   4  -4  415.43   16.79
   3  -4  -4  459.86   17.45
   3  -4  -4  419.04   18.33
   3   4  -4  441.28   17.09
   3   4  -4  406.64   16.97
   3   4  -4  382.51   17.02
   3  -4  -4  459.29   17.77
   3   4  -4  453.46   23.08
  -3  -4   4  484.73   18.06
  -3  -4   3   98.99    6.75
  -3   4   3  107.03    6.96
   3   4  -3  100.88    5.71
  -3  -4   3  115.90    6.41
   3   4  -3  104.66    5.80
   3  -4  -3  112.28    6.17
  -3  -4   3  112.93    6.22
  -3  -4   3  124.60    9.87
   3   4  -3  134.42   10.29
  -3  -4   2  273.15   12.80
  -3   4   2  268.05   12.78
  -3  -4   2  340.52   17.44
  -3  -4   2  311.40   12.77
   3   4  -2  315.35   18.38
  -3  -4   1  894.49   33.31
   3   4  -1  922.64   40.72
  -3  -4   1  919.19   33.44
  -3  -4   0   83.82    6.21
   3   4   0   97.71    9.70
  -3  -4   0  117.14   10.55
  -3  -4   0  112.84    6.13
  -3  -4  -1   27.81    3.53
  -3   4  -1   28.08    3.44
   3   4   1   30.05    3.25
   3  -4   1   35.56    3.52
   3  -4   1   30.34    2.57
  -3  -4  -1   38.45    3.48
  -3  -4  -2  264.20   14.55
  -3   4  -2  238.35   13.74
  -3   4  -2  279.21   13.29
   3   4   2  288.51   13.70
   3  -4   2  303.46   14.12
   3  -4   2  248.25   11.50
  -3  -4  -2  316.52   13.65
  -3  -4  -2  281.52   13.11
   3   4   3   59.11    7.69
   3  -4   3   50.79    5.61
  -3   4  -3   57.20    6.32
   3  -4   3   52.82    4.11
   3   4   3   48.01    5.31
   3  -4   3   49.87    3.83
  -3  -4  -3   54.05    4.88
  -3  -4  -3   60.44    5.01
   3   4   4    5.01    2.62
   3  -4   4    5.17    2.35
  -3   4  -4    2.49    1.92
   3   4   4    4.67    2.13
  -3  -4  -4    3.93    2.47
  -3  -4  -4    3.44    1.44
   3  -4   4    4.61    1.25
  -3  -4  -5   87.53   10.72
   3  -4   5   85.16    6.80
  -3  -4  -5   84.89    6.51
   3  -4   5   65.21    5.05
   3   4   5   82.71    9.33
  -3   4  -5   70.76    8.04
  -3  -4  -6 1444.23   59.45
   3  -4   6 1211.99   45.38
  -3  -4  -6 1191.93   47.16
  -3  -4  -6 1219.91   46.13
   3   4   6 1365.62   55.27
  -3   4  -6 1195.31   52.28
   3   4   7  115.00    7.49
   3  -4   7  135.37    7.92
  -3  -4  -7  126.18    8.88
  -3  -4  -7  122.73    8.13
  -3   4  -7  111.39    6.80
   3   4   7  117.80   11.81
   3  -4   7  131.42    8.58
  -3   4  -7  120.91   11.32
  -3  -4  -8   26.70    3.91
  -3   4  -8   19.57    6.09
  -3  -4  -8   24.68    3.54
  -3  -4  -8   20.36    3.72
  -3   4  -8   20.75    2.64
   3  -4   8   25.39    3.35
   3   4   8   26.65    3.48
   3  -4   8   29.06    3.95
  -3   4  -8   22.84    4.90
   3   4   8   32.47    6.31
   3  -4   9    1.82    1.29
   3   4   9    1.02    1.21
  -3  -4  -9    1.58    1.27
   3  -4   9    1.44    1.54
  -3   4  -9    1.58    1.51
  -3  -4  -9    2.69    1.91
  -3  -4  -9    2.99    1.60
  -3   4  -9    6.40    4.03
  -3   4  -9    2.15    1.14
   3   4   9    4.94    2.75
  -3  -4  -9    2.47    1.66
  -3   4  -9    2.21    2.14
  -3  -4 -10 1024.68   38.40
  -3  -4 -10  915.43   36.76
  -3  -4 -10  889.45   38.37
  -3   4 -10  818.08   36.97
  -3   4 -10  808.07   49.81
  -3   4 -10  901.88   34.12
   3  -4  10 1007.29   36.70
   3   4  10  887.12   36.00
  -3  -4 -10  882.26   36.91
  -3   4 -10  979.57   42.40
   3  -4  11    4.78    1.90
  -3   4 -11    4.57    2.09
  -3  -4 -11    9.39    2.87
  -3   4 -11    7.49    4.70
  -3  -4 -11    7.93    2.13
   3  -4  11    4.57    1.77
   3   4  11    7.78    2.12
  -3  -4 -11    8.00    2.29
   3   4  11    9.78    2.14
  -3   4 -11    6.32    1.56
  -3  -4 -11    3.85    1.68
  -3   4 -12   20.58    3.48
  -3  -4 -12   19.48    3.07
   3  -4  12   15.26    2.92
  -3  -4 -12   20.43    3.25
   3  -4  12   16.97    2.83
   3   4  12   21.55    3.14
   3   4  12   18.00    2.52
   3  -4  12   19.26    3.12
   3   4  13  233.55   11.89
  -3   4 -13  251.19   12.79
   3  -4  13  227.70   12.07
  -3  -4 -13  269.64   12.61
   3   4  14  209.79   10.20
   3  -4  14  211.00   10.53
  -3  -4 -14  230.11   10.42
  -3  -4 -15    3.72    1.10
   3  -4  15    3.72    1.03
   3  -5 -16    1.35    0.97
  -3  -5  16    1.66    0.98
  -3  -5  15   30.07    3.20
   3   5 -15   30.23    2.73
   3   5 -15   32.14    2.77
  -3  -5  15   46.74    4.40
   3  -5 -15   43.69    4.53
   3   5 -14  801.79   31.03
   3  -5 -14  956.08   34.56
   3   5 -14  784.60   31.04
   3  -5 -14  927.12   36.00
   3  -5 -13    2.59    1.58
   3   5 -13    3.15    1.38
   3  -5 -13    2.02    1.61
   3   5 -13    3.95    1.27
   3   5 -13    1.94    1.18
   3  -5 -13    5.36    2.56
   3   5 -12  234.68   11.89
   3   5 -12  231.88   11.52
   3  -5 -12  227.37   13.91
   3   5 -12  233.14   11.82
   3   5 -12  262.30   18.34
   3   5 -12  223.72   21.91
   3  -5 -12  252.83   15.82
   3  -5 -11    7.03    2.30
   3   5 -11    6.63    1.88
   3  -5 -11   12.07    3.94
   3   5 -11    6.62    1.79
   3   5 -11    9.83    2.09
   3   5 -11    9.01    4.86
  -3  -5  11    8.60    4.42
   3   5 -10  528.48   22.93
   3   5 -10  576.19   22.94
   3  -5 -10  727.04   34.04
  -3  -5  10  619.57   23.47
   3  -5 -10  491.75   25.16
   3   5 -10  549.99   23.22
   3   5 -10  516.85   22.29
   3   5 -10  520.73   22.52
   3   5 -10  456.42   33.90
  -3  -5  10  424.21   33.34
  -3  -5  10  571.73   23.69
  -3  -5   9   47.63    4.96
   3   5  -9   51.01    4.58
   3   5  -9   54.20    4.95
  -3  -5   9   61.19    4.90
   3  -5  -9   45.29    5.66
   3  -5  -9   50.80    9.00
   3   5  -9   48.67    4.47
   3   5  -9   48.21    4.74
   3   5  -9   47.08    4.44
   3   5  -9   52.63    4.67
  -3  -5   9   39.26    8.54
   3   5  -9   47.01    9.27
   3  -5  -9   51.74    4.50
  -3  -5   9   60.84    5.19
  -3  -5   8  105.33    7.50
   3   5  -8  107.27    6.87
   3  -5  -8   73.45   10.54
   3  -5  -8   77.39    7.27
  -3  -5   8  103.31    6.65
   3   5  -8  101.20    6.82
   3   5  -8  104.61    6.78
   3   5  -8   92.19    6.59
   3  -5  -8   99.54    6.54
  -3  -5   8  107.99    7.15
   3   5  -8  106.80   13.41
  -3  -5   8   72.26   11.04
   3  -5  -7  178.55   11.85
  -3  -5   7  133.18   14.24
   3   5  -7  137.57   15.24
  -3  -5   7  175.78   10.00
   3   5  -7  182.08    9.48
  -3  -5   7  178.10    9.25
   3  -5  -7  134.25   12.77
   3  -5  -7  147.29    9.94
   3   5  -7  164.39    9.12
   3   5  -7  151.31    8.44
   3   5  -7  159.79    9.12
   3   5  -7  158.69    9.18
   3   5  -7  171.87   12.01
  -3  -5   7  177.52    9.53
   3  -5  -7  199.01    9.63
   3  -5  -6  189.80   10.36
  -3  -5   6  118.53   12.86
   3  -5  -6  201.13   11.96
   3   5  -6  191.65   16.42
  -3  -5   6  180.05    9.84
   3   5  -6  174.58    9.13
   3  -5  -6  166.31   11.99
  -3  -5   6  166.36    8.92
   3  -5  -6  169.95    9.77
   3   5  -6  160.32    8.87
   3   5  -6  156.19    8.55
   3   5  -6  157.02    8.13
  -3  -5   6  156.93    8.95
   3  -5  -6  162.51    8.98
   3  -5  -5  144.10    8.53
  -3  -5   5  145.10   12.89
   3  -5  -5  149.26    9.75
   3   5  -5  142.57   13.39
  -3  -5   5  142.41    8.44
   3  -5  -5  141.36    8.12
   3  -5  -5  122.43    8.89
   3   5  -5  143.89    7.78
   3   5  -5  134.71    7.17
   3   5  -5  139.42    7.44
   3  -5  -5  139.19    8.04
   3   5  -5  153.53   13.24
  -3  -5   5  143.19    8.21
   3   5  -4   45.03    6.87
  -3  -5   4   38.06    6.21
   3  -5  -4   35.16    3.52
   3   5  -4   39.26    6.23
   3   5  -4   42.28    3.26
   3  -5  -4   37.72    3.40
   3  -5  -4   32.48    3.69
   3   5  -4   42.15    3.36
   3   5  -4   34.29    3.30
   3   5  -4   38.70    3.30
   3  -5  -4   40.10    3.88
   3   5  -3   54.24    3.90
   3   5  -3   49.07    3.77
  -3  -5   3   60.79    7.38
  -3  -5   3   52.36    3.64
   3  -5  -3   46.61    4.07
   3  -5  -3   49.33    3.70
   3  -5  -3   47.50    4.02
   3  -5  -2  460.37   18.21
  -3  -5   2  531.93   19.98
  -3  -5   2  457.72   19.14
   3   5  -2  419.17   18.24
  -3  -5   2  507.47   19.00
   3   5  -2  471.04   26.47
  -3  -5   1  233.38   10.81
   3  -5  -1  226.10    9.63
  -3  -5   1  214.93   17.22
  -3  -5   1  205.83    9.99
   3   5  -1  193.63   10.04
   3  -5  -1  185.01    9.06
   3   5  -1  250.94   17.57
  -3  -5   1  235.85   10.77
   3  -5   0  690.16   28.26
  -3  -5   0  774.35   30.00
  -3  -5   0  820.63   30.28
   3   5   0  766.65   29.01
  -3  -5   0  855.30   30.86
   3   5   0  902.26   40.17
  -3  -5   0  824.55   40.40
  -3  -5  -1  225.97   18.03
   3  -5   1  190.29    9.32
  -3  -5  -1  214.54   10.96
  -3  -5  -1  205.90   10.73
   3   5   1  192.69   10.01
  -3   5  -1  179.03   12.28
   3   5   1  244.94   17.72
  -3  -5  -1  212.18   11.39
  -3  -5  -2  247.40   13.52
  -3   5  -2  203.48   15.22
   3  -5   2  287.99   12.12
  -3  -5  -2  273.11   13.47
  -3  -5  -2  258.35   13.21
   3  -5   2  252.74   11.76
   3   5   2  295.75   20.06
  -3  -5  -2  306.45   21.71
  -3   5  -3  151.48   13.46
  -3  -5  -3  211.78   11.70
   3  -5   3  217.52   10.11
  -3  -5  -3  180.72   11.15
   3  -5   3  194.24    9.69
  -3  -5  -3  140.37   10.40
  -3   5  -3  248.66   15.58
  -3  -5  -3  222.41   18.39
   3  -5   3  194.54   11.85
  -3  -5  -4  477.73   24.62
  -3   5  -4  698.17   31.72
  -3   5  -4  426.98   28.55
  -3  -5  -4  608.06   25.67
  -3  -5  -4  544.05   25.84
   3  -5   4  601.85   23.57
   3  -5   4  598.51   23.55
   3   5   4  760.23   35.29
   3  -5   4  582.12   26.04
  -3   5  -5    3.60    2.38
   3  -5   5   12.28    2.40
  -3  -5  -5    8.91    2.37
   3  -5   5   10.15    2.14
   3   5   5   14.96    4.65
  -3   5  -5   11.16    3.61
   3  -5   5    8.27    2.44
  -3  -5  -5    6.80    2.61
  -3  -5  -6   69.01    6.86
  -3   5  -6   69.38    9.20
   3  -5   6   65.06    5.71
  -3  -5  -6   57.00    7.33
  -3  -5  -6   72.44    6.86
  -3   5  -6   53.41    9.16
  -3  -5  -6   72.70    5.87
   3  -5   6   68.52    6.76
  -3  -5  -7  147.75   11.21
  -3   5  -7  166.46   14.72
   3  -5   7  180.33   10.52
  -3  -5  -7  162.42   13.56
  -3  -5  -7  181.15   11.63
  -3  -5  -7  165.97    9.97
  -3   5  -7  168.56    9.25
   3   5   7  177.01   15.93
   3  -5   7  189.73   11.93
  -3  -5  -8  227.99   14.53
  -3   5  -8  241.36   17.91
  -3  -5  -8  270.66   17.89
   3  -5   8  250.60   13.51
  -3  -5  -8  249.56   14.41
  -3  -5  -8  255.56   13.31
  -3   5  -8  234.53   11.74
   3   5   8  269.72   19.76
   3  -5   8  266.22   14.79
  -3  -5  -9   47.69    5.69
  -3   5  -9   44.37    7.04
   3  -5   9   38.57    4.62
  -3  -5  -9   50.13    5.67
  -3  -5  -9   53.63    7.09
  -3  -5  -9   46.20    4.87
  -3   5  -9   27.35    7.31
  -3   5  -9   42.12    3.86
   3   5   9   45.56    7.51
   3  -5   9   50.77    5.79
  -3  -5 -10  102.43    9.45
   3  -5  10   89.37    7.21
  -3  -5 -10  111.51    8.46
  -3  -5 -10   99.53    7.34
  -3   5 -10   93.04    5.95
  -3  -5 -10  110.85    8.24
   3  -5  10  103.63    8.39
  -3  -5 -11    6.07    1.78
  -3  -5 -11    3.09    1.69
   3  -5  11    2.22    1.44
  -3  -5 -11    3.82    1.51
   3   5  11    3.90    1.50
  -3  -5 -11    3.03    1.98
   3  -5  11    5.17    2.09
   3   5  12  353.78   15.84
   3  -5  12  410.89   17.78
  -3  -5 -12  399.57   18.77
   3  -5  12  335.83   16.50
  -3  -5 -12  410.72   17.85
  -3  -5 -13    1.67    1.30
   3   5  13    2.60    1.10
  -3  -5 -14    3.85    1.20
   3   5  14    4.73    1.12
   3  -5  14    2.71    0.97
  -3  -5 -15    0.38    0.57
   3  -6 -15   12.76    2.15
  -3  -6  15   12.66    2.01
  -3  -6  14  106.34    6.71
   3   6 -14  113.81    5.97
   3  -6 -14  127.05    7.65
   3   6 -14  110.12    5.94
   3  -6 -14  117.69    8.19
   3   6 -13    0.11    0.96
   3  -6 -13    0.48    1.25
   3   6 -13    1.36    0.85
   3   6 -12   25.01    2.91
   3  -6 -12   27.82    4.76
   3  -6 -12   26.21    3.64
  -3  -6  12   34.57    6.45
   3   6 -12   25.20    2.91
   3   6 -11   64.79    5.11
   3  -6 -11   49.98    5.49
   3  -6 -11   67.91    8.32
   3   6 -11   60.58    4.56
   3   6 -11   60.27    4.93
   3   6 -10   24.21    2.97
   3   6 -10   26.43    3.33
   3  -6 -10   27.10    6.08
   3  -6 -10   22.15    3.71
  -3  -6  10   24.74    3.25
   3   6 -10   24.81    3.29
   3   6 -10   20.08    2.82
   3   6 -10   22.93    2.92
   3   6 -10   22.59    6.73
   3  -6 -10   17.34    3.86
  -3  -6  10    9.28    5.03
  -3  -6  10   29.49    4.08
  -3  -6   9   79.68    6.84
   3   6  -9   75.69    5.58
   3   6  -9   73.97    5.95
  -3  -6   9   81.78    5.96
   3  -6  -9   55.84    6.03
   3  -6  -9   65.43    9.81
   3   6  -9   70.31    5.54
   3   6  -9   76.56    5.63
   3   6  -9   72.51    5.63
   3  -6  -9   60.45    7.12
  -3  -6   9   47.17    9.92
   3   6  -9   63.59   11.10
  -3  -6   9   80.57    6.23
  -3  -6   8   32.58    4.30
   3   6  -8   34.37    3.82
  -3  -6   8   31.37    3.59
   3  -6  -8   31.67    6.49
   3  -6  -8   25.56    3.95
   3   6  -8   28.54    3.46
   3   6  -8   27.20    3.45
   3   6  -8   33.05    3.71
   3  -6  -8   26.76    4.79
   3   6  -8   27.77    7.14
  -3  -6   8   13.60    4.95
   3  -6  -8   35.27    3.88
  -3  -6   8   33.11    3.81
  -3  -6   7  499.22   21.56
   3   6  -7  510.19   20.13
  -3  -6   7  476.61   19.91
   3  -6  -7  426.99   20.60
   3  -6  -7  387.07   24.39
   3   6  -7  478.94   19.91
   3   6  -7  463.22   19.91
   3   6  -7  438.94   18.83
   3   6  -7  469.74   20.01
   3  -6  -7  460.39   20.04
   3  -6  -7  466.74   23.28
   3   6  -7  431.58   29.72
  -3  -6   6  293.80   20.87
   3  -6  -6  479.86   20.85
   3  -6  -6  469.80   22.59
  -3  -6   6  318.47   24.76
   3   6  -6  462.44   29.09
  -3  -6   6  490.88   20.80
   3   6  -6  499.81   19.52
  -3  -6   6  446.22   19.08
   3  -6  -6  410.79   22.13
   3  -6  -6  422.09   19.56
   3   6  -6  469.05   19.28
   3   6  -6  462.41   18.77
   3   6  -6  426.61   17.83
   3  -6  -6  434.62   19.41
  -3  -6   5   78.26    7.69
   3  -6  -5  108.47    7.58
   3  -6  -5  108.81    8.69
  -3  -6   5   84.52   10.67
  -3  -6   5  113.59    7.70
  -3  -6   5  105.78    6.77
   3  -6  -5  100.76    6.86
   3  -6  -5   93.44    7.72
   3   6  -5  103.81    6.63
   3   6  -5  102.90    6.05
   3   6  -5   98.82    6.20
   3   6  -5  111.31   11.95
   3  -6  -5  103.92    7.07
   3  -6  -4   71.99    5.81
   3  -6  -4   77.14    5.81
  -3  -6   4   63.42    6.13
  -3  -6   4   55.42    8.14
   3  -6  -4   71.94    6.53
  -3  -6   4   56.32    5.11
   3   6  -4   64.07    4.47
   3  -6  -4   69.52    5.09
   3  -6  -4   63.14    5.49
   3   6  -4   71.93    4.77
   3   6  -4   58.64    4.72
   3   6  -4   54.77    4.45
   3  -6  -4   69.74    5.53
   3   6  -4   66.84    9.03
  -3  -6   4   63.85    5.29
   3  -6  -3  266.13   12.51
   3  -6  -3  242.54   12.66
  -3  -6   3  184.54   19.28
   3  -6  -3  240.83   11.46
  -3  -6   3  266.60   13.49
  -3  -6   3  214.91   11.78
   3   6  -3  242.46   11.44
   3   6  -3  248.94   11.58
  -3  -6   3  255.12   11.41
  -3  -6   3  261.70   12.54
   3   6  -3  241.35   17.75
   3   6  -3  238.78   11.79
   3  -6  -3  274.49   14.08
  -3  -6   2  460.61   21.64
   3  -6  -2  607.89   24.61
   3   6  -2  579.68   22.47
  -3  -6   2  586.76   22.42
   3   6  -2  585.70   32.11
  -3  -6   2  589.76   23.16
   3  -6  -2  549.77   21.73
   3  -6  -2  559.54   22.80
  -3  -6   2  431.77   32.25
   3  -6  -1  200.44   10.50
  -3  -6   1  277.37   13.20
  -3  -6   1  251.08   12.43
  -3  -6   1  262.83   12.50
   3   6  -1  266.92   20.17
   3  -6  -1  277.63   13.78
   3   6  -1  232.39   11.74
   3  -6  -1  239.14   11.98
  -3  -6   1  224.08   20.78
  -3  -6   1  260.64   12.69
  -3  -6   1  269.54   12.94
   3  -6   0  409.38   17.40
  -3  -6   0  337.31   16.16
   3   6   0  326.52   23.64
  -3  -6   0  313.76   24.90
  -3  -6   0  355.81   15.90
  -3  -6   0  365.46   16.23
  -3  -6   0  341.67   16.03
   3  -6   0  265.61   13.61
  -3  -6  -1  164.58    9.31
  -3  -6  -1  153.54   16.54
   3  -6   1  118.82    7.38
  -3  -6  -1  151.13    9.25
  -3  -6  -1  148.13    9.23
   3   6   1  130.06    7.96
   3  -6   1  164.84    9.98
  -3   6  -1  143.06   11.70
  -3  -6  -1  133.69    9.43
   3   6   1  165.38   15.74
  -3  -6  -2  615.78   26.82
  -3  -6  -2  619.12   26.82
   3  -6   2  560.78   24.47
   3  -6   2  706.37   27.74
  -3  -6  -2  780.46   27.87
   3  -6   2  569.64   27.95
  -3  -6  -2  646.13   38.23
  -3  -6  -2  560.70   27.03
   3   6   2  755.37   38.07
  -3   6  -2  655.64   31.70
   3   6   2  591.34   25.35
  -3  -6  -3    1.62    1.41
   3  -6   3    3.09    1.32
   3   6   3    4.23    1.56
  -3  -6  -3    1.70    1.48
  -3   6  -3    3.86    2.23
  -3  -6  -3    0.54    1.19
  -3  -6  -3    4.02    3.16
  -3   6  -4   18.96    4.87
  -3  -6  -4   24.73    4.45
  -3  -6  -4   25.48    4.47
   3  -6   4   36.50    3.80
   3  -6   4   34.22    3.78
  -3  -6  -4   26.90    4.28
  -3   6  -4   40.07    7.01
  -3  -6  -4   39.03    8.22
  -3   6  -5  100.12   11.30
   3  -6   5   89.71    6.79
  -3  -6  -5   75.53    8.51
   3  -6   5   96.54    6.64
   3   6   5   88.79   11.98
  -3  -6  -5  101.19   13.44
   3  -6   5   81.79    7.90
  -3   6  -6    6.73    3.42
   3  -6   6   16.51    2.83
  -3  -6  -6   19.85    3.94
   3   6   6   19.90    5.88
  -3   6  -6   22.23    5.45
  -3  -6  -6   15.97    4.40
   3  -6   6   23.00    4.16
  -3  -6  -7    4.03    2.29
   3   6   7    5.52    3.59
  -3   6  -7    2.32    2.42
  -3  -6  -7    2.83    1.75
   3  -6   7    2.73    1.44
  -3  -6  -7    3.38    1.41
  -3   6  -7    2.16    2.25
  -3   6  -7    2.19    1.22
  -3  -6  -7    0.53    1.83
   3  -6   7    5.63    2.31
   3  -6   8   39.62    4.49
  -3  -6  -8   44.29    7.29
  -3  -6  -8   42.77    5.55
  -3  -6  -8   42.26    4.45
  -3   6  -8   20.25    5.87
  -3   6  -8   41.32    3.95
  -3  -6  -8   42.87    5.58
  -3   6  -8   33.17    6.40
   3   6   8   51.45    8.55
   3  -6   8   40.19    5.29
  -3  -6  -9  198.40   14.60
  -3  -6  -9  193.92   12.05
   3  -6   9  199.33   11.05
  -3   6  -9  175.13    8.99
  -3  -6  -9  171.98   11.56
   3  -6   9  210.15   12.61
   3  -6  10   27.13    4.12
  -3  -6 -10   26.59    3.99
  -3  -6 -10   30.84    4.96
   3  -6  10   26.05    3.50
   3   6  10   27.67    3.83
   3   6  10   30.18    3.64
  -3  -6 -10   29.78    3.98
   3  -6  11  134.94    8.72
  -3  -6 -11  140.73    9.48
   3  -6  11  110.49    7.30
   3   6  11  129.24    8.03
   3   6  11  104.18    6.86
  -3  -6 -11  115.59    7.30
  -3  -6 -12  112.30    7.64
   3  -6  12  100.41    6.42
   3   6  12  123.06    7.14
   3   6  12  107.86    6.20
   3  -6  12  125.63    7.46
  -3  -6 -13    3.54    1.20
  -3  -6 -13    6.68    1.52
  -3  -7  14    0.98    1.02
   3  -7 -14    3.26    1.24
   3   7 -13  317.82   13.49
  -3  -7  13  338.90   14.81
   3   7 -13  320.44   13.58
   3   7 -12   39.26    3.33
   3  -7 -12   49.50    5.37
   3   7 -12   43.06    3.44
   3  -7 -12   47.25    5.37
   3   7 -11   57.68    4.42
   3  -7 -11   69.35    7.40
   3   7 -11   58.24    4.54
   3  -7 -11   56.25    6.32
   3   7 -10  109.66    6.85
  -3  -7  10  124.64    7.56
   3  -7 -10  116.95   11.02
   3   7 -10  106.24    6.87
   3   7 -10   95.39    6.17
  -3  -7  10   78.82   11.53
   3  -7 -10   96.99    8.88
   3   7  -9  511.26   20.27
   3   7  -9  494.32   19.07
   3  -7  -9  375.07   19.48
  -3  -7   9  513.17   20.29
   3  -7  -9  450.42   26.35
   3   7  -9  497.75   19.32
   3   7  -9  484.59   19.43
   3   7  -9  508.62   20.51
   3   7  -9  484.81   19.51
   3  -7  -9  380.19   22.21
  -3  -7   8   12.79    2.93
   3   7  -8    9.68    1.99
   3   7  -8   13.77    2.61
   3  -7  -8    9.76    3.74
  -3  -7   8   12.09    2.34
   3   7  -8   15.53    2.38
   3   7  -8   10.23    2.13
   3   7  -8   10.72    2.20
  -3  -7   8    2.83    2.75
   3  -7  -8    9.67    2.25
   3  -7  -8    7.87    2.71
   3  -7  -7   89.57    8.60
  -3  -7   7   92.12    7.61
   3   7  -7   89.34    6.08
   3  -7  -7   74.24    8.54
   3  -7  -7   64.37    5.92
  -3  -7   7   84.47    6.19
   3   7  -7   83.59    6.06
   3   7  -7   84.98    6.19
   3   7  -7   76.60    6.01
   3   7  -7   73.16    5.27
  -3  -7   7   88.22    6.50
   3  -7  -6  102.34    9.32
  -3  -7   6  103.17    8.05
   3   7  -6  113.75    7.24
  -3  -7   6  102.45    7.19
   3  -7  -6  102.48    7.38
   3   7  -6  116.80    7.05
   3   7  -6  107.33    7.19
  -3  -7   6  120.12    7.85
   3  -7  -5  218.74   12.26
  -3  -7   5  175.05   12.30
   3  -7  -5  184.97   10.66
   3  -7  -5  195.41   13.20
  -3  -7   5  190.64   11.36
   3   7  -5  217.13   11.05
  -3  -7   5  215.12   11.22
   3   7  -5  207.29   10.67
   3   7  -5  192.53    9.93
  -3  -7   5  215.79   11.41
   3   7  -5  223.84   18.81
   3  -7  -4  149.30    9.70
   3  -7  -4  166.77   10.02
  -3  -7   4  134.09    9.82
   3  -7  -4  144.79    8.65
   3  -7  -4  144.39   10.61
  -3  -7   4  123.78    8.60
  -3  -7   4  142.65    8.93
   3   7  -4  148.87    8.86
   3   7  -4  153.93    8.37
   3   7  -4  157.36    8.67
  -3  -7   4  167.65    9.69
   3   7  -4  178.57   16.25
  -3  -7   4  160.42    9.39
   3  -7  -3    9.32    2.56
   3   7  -3    5.54    1.44
  -3  -7   3    6.24    1.57
  -3  -7   3    4.88    1.59
   3   7  -3   12.56    4.38
   3   7  -3    5.15    1.45
   3   7  -3   11.19    2.26
   3   7  -3    7.94    1.83
   3  -7  -3    7.15    2.07
  -3  -7   3    3.57    1.54
   3  -7  -3    8.45    2.06
  -3  -7   3    4.13    3.22
  -3  -7   3    7.00    2.00
  -3  -7   2    6.00    1.86
  -3  -7   2    4.66    1.44
   3   7  -2    6.26    1.68
   3   7  -2    9.19    1.91
   3  -7  -2    8.26    2.27
   3  -7  -2    8.72    2.32
   3  -7  -2    7.06    1.90
  -3  -7   2    5.27    1.74
  -3  -7   2    3.05    3.18
  -3  -7   1   69.49    5.89
   3   7  -1   63.27   10.13
  -3  -7   1   74.68    5.94
   3  -7  -1   53.69    4.34
   3  -7  -1   70.98    6.64
   3   7  -1   63.23    5.37
  -3   7   1   58.25    8.80
  -3  -7   1   71.88    6.07
   3  -7  -1   67.69    5.77
  -3  -7   1   48.09   10.37
   3  -7   0  154.93    8.97
  -3  -7   0  190.64   11.33
   3   7   0  203.79   18.85
  -3  -7   0  174.08   10.75
   3  -7   0  206.35   12.02
   3   7   0  181.43   10.23
  -3   7   0  176.67   15.02
  -3  -7   0  210.02   11.80
  -3  -7   0  203.70   11.34
   3  -7   0  171.51   10.43
  -3  -7   0  154.24   18.77
  -3  -7  -1   27.06    4.08
  -3  -7  -1   25.16    3.82
   3   7   1   33.19    7.72
   3   7   1   31.82    3.98
  -3  -7  -1   28.80    4.08
  -3  -7  -1   22.10    7.01
  -3  -7  -1   31.73    4.10
   3  -7   1   22.88    2.93
  -3  -7  -1   24.17    3.79
  -3  -7  -2   12.26    5.26
  -3  -7  -2    7.51    2.44
  -3  -7  -2   15.18    3.20
   3  -7   2    9.49    2.07
  -3  -7  -2   11.79    2.77
  -3   7  -2   13.05    3.99
   3   7   2   13.18    5.19
  -3  -7  -2    5.43    2.20
  -3  -7  -3  204.10   13.09
  -3  -7  -3  196.89   12.91
   3  -7   3  190.15   10.51
  -3  -7  -3  195.54   20.22
   3   7   3  239.45   20.52
  -3  -7  -3  149.40   11.78
  -3   7  -3  208.44   16.49
   3   7   3  173.59   10.28
   3  -7   4   14.53    2.69
  -3  -7  -4   15.95    3.86
  -3  -7  -4   14.72    3.71
  -3  -7  -4   19.99    6.59
  -3   7  -4   18.43    5.03
  -3  -7  -4   12.50    3.22
   3   7   4   13.27    2.59
  -3  -7  -5  180.61   14.61
  -3  -7  -5  163.55   13.54
  -3  -7  -5  141.53   11.56
  -3   7  -5  164.55   15.27
   3   7   5  211.00   19.35
   3   7   5  194.52   10.84
  -3  -7  -6    3.61    2.90
   3  -7   6    5.90    1.73
   3   7   6    5.27    1.82
  -3  -7  -6    5.78    3.36
   3   7   6    5.29    3.94
  -3   7  -6    4.03    2.66
  -3   7  -7  101.55    6.52
   3   7   7  107.36    7.82
   3   7   7  111.61   13.44
  -3  -7  -7  100.60    8.98
  -3  -7  -7  111.49   11.83
   3  -7   7  109.85    7.23
  -3  -7  -7   92.75   11.91
  -3  -7  -8  199.48   15.31
   3  -7   8  172.37    9.83
  -3  -7  -8  191.32   16.11
   3   7   8  198.41   11.01
  -3   7  -8  161.29    8.64
   3  -7   8  185.79   12.18
  -3  -7  -8  182.93   12.01
   3   7   9  210.60   11.76
  -3  -7  -9  225.44   12.77
   3  -7   9  232.05   13.41
  -3  -7  -9  248.43   15.61
   3  -7   9  202.66   11.02
  -3  -7  -9  245.31   16.09
   3  -7  10  115.62    8.15
  -3  -7 -10  102.15    8.45
  -3  -7 -10  113.65    8.71
   3  -7  10   96.14    6.41
   3   7  10  107.03    6.82
  -3  -7 -10  102.55    7.04
   3   7  10  108.40    7.13
  -3  -7 -11  162.31    9.54
  -3  -7 -11  173.52    9.55
   3   7  11  154.94    8.19
   3   7  11  167.57    8.81
   3   7  12    1.50    0.76
   3   7  12    0.41    0.72
  -3  -8  12   19.03    1.90
   3   8 -12   30.04    2.26
   3   8 -11  167.60    7.73
   3  -8 -11  183.81   10.96
   3   8 -11  168.90    7.89
   3   8 -10   14.91    2.07
   3   8 -10   15.65    2.21
  -3  -8  10   10.87    2.21
  -3  -8  10   20.17    5.23
   3  -8 -10   13.00    3.11
  -3  -8   9    5.86    3.24
   3   8  -9    6.97    1.67
  -3  -8   9   10.82    2.15
   3   8  -9   13.41    1.96
   3   8  -9    7.78    1.55
   3   8  -9   10.51    2.05
   3  -8  -9    7.01    2.60
   3   8  -8   58.54    4.81
   3   8  -8   54.49    4.10
  -3  -8   8   60.18    4.94
   3   8  -8   58.53    4.40
   3   8  -8   56.46    4.51
   3   8  -8   53.60    4.43
  -3  -8   7  107.03    7.27
   3   8  -7   92.92    6.05
  -3  -8   7  100.50    6.86
   3   8  -7  110.63    6.76
   3   8  -7  103.59    6.83
   3   8  -7  110.98    6.91
   3  -8  -7   58.10    7.54
  -3  -8   7   53.73    7.40
  -3   8   6   25.09    6.55
  -3  -8   6   45.77    4.71
   3   8  -6   52.74    9.12
   3   8  -6   42.92    4.07
  -3  -8   6   42.74    4.36
   3   8  -6   40.96    4.17
   3   8  -6   46.17    4.43
   3   8  -6   47.94    4.62
   3   8  -6   40.28    3.70
   3  -8  -6   32.78    5.43
  -3  -8   6   27.76    3.98
  -3  -8   6   28.14    4.79
  -3   8   5   24.67    6.32
   3   8  -5   44.98    8.60
  -3  -8   5   44.16    4.67
   3   8  -5   36.57    3.89
  -3  -8   5   38.07    4.21
   3   8  -5   37.80    4.06
   3   8  -5   40.87    4.03
  -3  -8   5   30.05    4.20
   3  -8  -5   37.54    4.78
   3  -8  -5   33.67    5.38
   3  -8  -4  172.15   12.55
  -3  -8   4  204.30   11.38
   3   8  -4  231.50   19.79
   3   8  -4  190.33   10.41
   3   8  -4  195.25   10.54
   3   8  -4  195.55   10.03
  -3  -8   4  159.15   10.78
   3  -8  -4  197.96   11.76
   3  -8  -3  346.67   18.85
  -3  -8   3  360.95   17.37
   3   8  -3  407.39   27.18
  -3  -8   3  332.71   17.01
   3   8  -3  395.58   17.32
   3   8  -3  353.81   16.00
   3   8  -3  381.89   16.66
   3  -8  -3  348.95   17.68
   3  -8  -3  391.76   18.22
  -3  -8   3  322.31   17.26
   3  -8  -2  111.07    8.98
  -3  -8   2   93.95    7.50
   3   8  -2   93.96   12.56
  -3  -8   2  111.81    8.11
   3   8  -2  102.43    6.73
  -3  -8   2   98.10    7.68
   3   8  -2  112.30    6.96
   3   8  -2   99.75    7.19
  -3   8   2   73.87   10.24
   3   8  -2  109.82    7.62
   3  -8  -2  118.51    8.27
  -3  -8   2  103.04    8.04
   3  -8  -2   97.74    7.89
  -3  -8   1    7.08    2.19
  -3  -8   1    5.73    1.88
   3   8  -1    7.25    1.89
   3   8  -1    7.09    1.81
   3   8  -1    8.37    2.15
   3  -8  -1    5.67    2.08
  -3  -8   1    5.07    3.74
  -3  -8   1    9.59    2.47
   3  -8  -1    7.63    2.16
   3   8   0   12.00    2.51
   3   8   0    8.49    2.10
  -3  -8   0   10.80    2.65
  -3  -8   0   10.01    2.51
  -3  -8   0    7.07    4.23
  -3  -8   0   11.68    2.77
   3  -8   0    6.32    2.19
   3  -8   0    7.70    1.75
  -3   8  -1  141.11   14.01
  -3  -8  -1  136.89   10.03
   3   8   1  141.22   15.79
  -3  -8  -1  118.67    9.19
   3   8   1  118.72    7.94
  -3  -8  -1  152.32   10.26
   3  -8   1  132.76    9.23
  -3  -8  -1  103.11   15.41
   3  -8   1  123.57    7.88
  -3  -8  -2    0.88    1.29
   3   8   2   -0.78    2.66
  -3  -8  -2    0.33    1.20
  -3   8  -2    0.60    1.66
   3   8   2    0.59    0.95
  -3  -8  -2   -0.98    2.37
   3  -8   2    0.52    1.03
   3  -8   2   -0.19    0.84
  -3  -8  -3   89.49    8.87
   3   8   3  113.61   14.49
  -3  -8  -3   93.18    8.64
  -3   8  -3  127.23   13.20
   3   8   3  141.77    8.56
  -3  -8  -3  128.96   16.55
  -3  -8  -3  118.87   10.14
   3   8   4   73.16    6.02
  -3  -8  -4   65.39    8.09
  -3  -8  -4   44.84    6.06
  -3  -8  -4   49.81    6.51
   3   8   4   77.07   11.52
  -3   8  -4   81.18   10.28
  -3  -8  -5  216.77   15.86
   3   8   5  139.86    8.65
   3   8   5  197.39   10.57
  -3  -8  -5  171.21   12.31
  -3  -8  -5  125.26   10.64
  -3  -8  -6  151.56   13.96
   3   8   6  135.47    8.07
  -3   8  -6  122.96    7.25
   3   8   6  160.66    9.34
  -3  -8  -6  112.93    9.48
  -3  -8  -7  117.25   12.04
   3   8   7  118.85    7.63
  -3  -8  -8   79.97    8.43
   3   8   8   72.55    5.42
   3   8   8   85.55    6.07
  -3  -8  -8   74.43    6.58
  -3  -8  -9   89.88    7.30
   3   8   9   76.68    5.46
  -3  -8  -9   90.66    6.31
   3   8   9   74.58    5.22
   3   8  10   25.94    2.37
  -3  -8 -10   28.10    2.78
   3   8  10   26.74    2.60
   3   9 -10    1.03    0.57
  -3  -9  10    0.19    0.58
   3   9  -9   88.27    5.17
  -3  -9   9   77.68    5.67
   3   9  -9   87.09    4.95
   3   9  -8   55.80    3.92
   3   9  -8   53.33    3.83
   3   9  -8   62.26    4.57
  -3  -9   8   51.44    4.84
   3   9  -8   57.90    4.26
   3   9  -7    1.43    0.82
   3   9  -7    1.71    0.98
   3   9  -7    2.31    1.07
  -3  -9   7    0.98    0.96
  -3  -9   7    0.60    0.93
   3   9  -7    1.71    1.05
  -3  -9   6    1.49    1.22
   3   9  -6    1.35    0.98
   3   9  -6    1.31    1.03
   3   9  -6    1.54    1.14
   3   9  -5  178.25    9.16
   3   9  -5  189.86    9.80
   3   9  -5  192.59    9.99
   3   9  -5  203.69   10.45
   3   9  -5  174.89    8.93
  -3  -9   5  198.45   10.95
   3   9  -4   34.94    3.54
  -3  -9   4   36.26    4.21
   3   9  -4   40.35    4.04
   3   9  -4   36.75    3.68
  -3  -9   4   36.96    4.39
  -3  -9   4   32.80    4.23
   3  -9  -4   35.24    4.54
  -3  -9   3   19.67    3.21
   3   9  -3   21.01    2.81
   3   9  -3   18.70    2.80
  -3  -9   3   17.11    3.03
   3   9  -3   22.04    2.74
  -3  -9   3   19.49    3.34
   3  -9  -3   19.77    3.42
  -3  -9   2    3.10    1.52
  -3  -9   2    1.95    1.40
   3   9  -2    2.51    1.15
   3   9  -2    3.10    1.31
   3  -9  -2    2.51    1.64
  -3  -9   2    2.97    1.66
   3   9  -2    2.75    1.45
  -3  -9   1  225.83   13.13
   3   9  -1  201.49   11.09
   3   9  -1  212.70   11.48
   3  -9  -1  208.77   12.83
  -3  -9   1  250.76   13.71
   3  -9  -1  256.68   13.57
   3   9   0    0.44    0.73
  -3  -9   0    2.08    1.40
   3   9   0    0.28    0.70
   3   9   0   -0.18    1.08
   3   9   0    0.19    1.07
   3  -9   0    0.27    1.29
   3  -9   0    1.00    1.15
  -3  -9  -1   17.48    3.36
  -3  -9  -1   19.76    3.70
   3   9   1   14.71    2.39
  -3  -9  -1   13.82    3.00
   3   9   1   12.44    2.19
   3   9   1   17.82    2.85
   3  -9   1   11.71    2.82
   3  -9   1   10.91    2.66
   3   9   2    4.77    1.43
  -3  -9  -2    1.69    1.43
   3   9   2    2.18    1.11
  -3  -9  -2    2.71    1.56
  -3  -9  -2    5.72    2.30
   3  -9   2    1.83    1.41
  -3  -9  -3  141.93   11.06
   3   9   3  124.84    7.65
   3   9   3  114.50    7.28
   3   9   3  129.87    7.33
  -3  -9  -3  123.41    8.38
  -3  -9  -4    9.43    2.99
   3  -9   4    3.87    1.73
   3   9   4    5.22    1.51
  -3  -9  -5   48.84    6.19
   3   9   5   53.75    4.24
  -3  -9  -6   33.56    4.70
   3   9   6   29.28    3.07
   3   9   7  119.57    6.59
   3  -9   7   97.72    7.97
  -3  -9  -8   51.46    4.32
   3   9   8   41.50    3.32
   3   9   8   34.94    3.12
   3  -9   8   39.64    4.33
   3   9   8   40.51    3.27
   3   9   8   38.86    3.17
   3  -9   9   13.58    2.14
   3  10  -7   56.37    3.83
  -3 -10   7   98.62    6.19
   3  10  -6    6.31    1.16
  -3 -10   6    8.62    2.03
   3  10  -6    5.89    1.25
  -3 -10   6    8.18    2.06
   3  10  -5    1.21    0.68
   3  10  -5    1.46    0.80
   3  10  -5    2.04    0.89
  -3 -10   5    2.95    1.56
   3  10  -5    1.62    0.93
  -3 -10   5    2.22    1.46
   3  10  -4   10.39    1.77
   3  10  -4    6.69    1.35
   3  10  -4    7.76    1.50
  -3 -10   4    9.69    2.27
  -3 -10   4   13.36    2.62
   3  10  -3   24.96    2.62
   3  10  -3   19.65    2.43
   3  10  -3   25.40    2.87
   3  10  -3   20.77    2.20
   3  10  -2    0.24    0.80
   3  10  -2    0.85    0.81
  -3 -10   2   -0.46    1.50
   3  10  -2    1.09    0.65
   3 -10  -2    2.42    1.40
   3  10  -1    2.51    0.88
  -3 -10   1    4.22    1.82
   3  10  -1    2.65    0.93
   3 -10  -1    3.67    1.72
   3  10  -1    4.43    1.24
   3  10   0    3.43    1.17
   3 -10   0    3.07    1.58
   3  10   0    3.22    1.01
   3  10   0    3.38    1.08
   3  10   1   29.38    3.00
   3  10   1   29.88    2.95
   3  10   1   28.74    2.78
   3 -10   1   36.47    4.53
   3 -10   1   25.81    3.83
   3  10   2   14.81    2.02
   3  10   2   17.66    2.24
   3 -10   2   11.29    2.70
   3 -10   2   13.73    2.72
   3  10   3   35.80    3.07
   3  10   3   37.71    3.21
   3 -10   3   23.03    3.56
   3 -10   3   19.04    3.42
   3  10   3   26.21    2.45
   3  10   4    0.31    0.66
   3  10   4    0.96    0.87
   3 -10   4    1.94    1.67
   3 -10   4    0.22    1.23
   3  10   4    0.35    0.63
   3 -10   5   78.81    6.16
   3 -10   5   76.85    5.97
   3  10   5   65.99    4.29
   3  10   5   61.86    4.20
   3 -10   6  129.10    7.72
   3 -10   6  133.71    7.93
   3 -10   7   93.68    5.50
   3 -10   7   88.98    5.28
  -4   0  17    0.15    0.85
  -4   0  16   54.71    5.10
   4   0 -15    0.17    1.06
   4   0 -15    0.35    2.01
  -4   0  15    1.42    1.71
  -4   0  14  355.79   26.59
   4   0 -14  359.82   20.70
   4   0 -14  394.36   17.76
   4   0 -14  305.03   29.34
  -4   0  14  370.70   18.49
  -4   0  13    1.52    1.06
  -4   0  13    2.23    2.93
   4   0 -13    2.62    2.33
   4   0 -13    2.21    1.57
   4   0 -13    0.88    1.34
   4   0 -13    1.12    2.70
   4   0 -13    2.23    2.74
  -4   0  12  866.12   33.92
  -4   0  12  851.46   35.21
   4   0 -12  877.07   34.88
  -4   0  12  862.73   45.07
   4   0 -12  760.61   37.12
   4   0 -12  704.65   41.93
   4   0 -12  928.70   35.38
   4   0 -12 1007.45   35.70
   4   0 -12 1057.53   48.62
   4   0 -12  630.92   46.59
   4   0 -11    0.95    2.29
  -4   0  11    0.50    0.86
  -4   0  11   -1.91    1.99
   4   0 -11    1.19    1.85
   4   0 -11    0.95    1.65
   4   0 -11    1.25    1.19
   4   0 -11    1.02    1.30
   4   0 -11    0.81    1.43
   4   0 -11    1.34    2.80
   4   0 -10  696.57   45.02
  -4   0  10  832.12   33.06
   4   0 -10  865.39   34.19
   4   0 -10  954.26   34.57
   4   0 -10  823.13   36.27
   4   0 -10  750.53   40.45
   4   0 -10  995.73   34.84
   4   0 -10  864.92   33.78
   4   0 -10  848.23   33.24
   4   0  -9    0.73    1.77
  -4   0   9    5.49    1.39
   4   0  -9    0.82    1.07
  -4   0   9    0.48    1.34
   4   0  -9    0.47    1.46
   4   0  -9    0.25    1.14
   4   0  -9    2.18    1.13
   4   0  -9    1.49    1.18
   4   0  -9    1.14    1.18
   4   0  -9    1.15    0.87
   4   0  -9    0.52    2.19
   4   0  -8  888.14   37.61
   4   0  -8  691.48   28.52
   4   0  -8  808.69   29.08
  -4   0   8  812.85   36.07
   4   0  -8  627.11   33.63
   4   0  -8  695.18   28.41
   4   0  -8  800.76   28.96
   4   0  -8  739.94   28.42
   4   0  -8  634.76   37.76
   4   0  -7    0.55    1.31
  -4   0   7    1.05    0.69
  -4   0   7   -0.37    1.26
   4   0  -7    0.79    1.03
   4   0  -7    1.93    1.78
   4   0  -7    0.90    0.80
   4   0  -7    0.38    0.73
   4   0  -7    2.09    1.01
   4   0  -7    0.36    1.12
   4   0  -6 1363.30   57.45
   4   0  -6 1516.20   52.74
  -4   0   6 1648.58   58.97
   4   0  -6 1391.20   52.54
   4   0  -6 1655.64   59.27
   4   0  -6 1525.71   62.07
   4   0  -5    0.52    1.09
   4   0  -5    0.29    1.07
   4   0  -5    0.77    1.41
   4   0  -5    2.16    1.30
   4   0  -4  443.81   20.07
   4   0  -4  405.43   21.08
   4   0  -3    1.43    1.18
   4   0  -3   -1.73    1.55
  -4   0   3    1.85    1.21
   4   0  -2  581.26   22.31
  -4   0   2  561.87   19.89
   4   0  -1    0.46    1.02
   4   0  -1   -0.19    0.83
  -4   0   1    1.00    0.93
   4   0   0 9999.00  338.46
  -4   0  -1    0.92    0.93
   4   0   1    0.50    1.26
  -4   0  -2    8.74    2.10
  -4   0  -3    1.89    1.36
  -4   0  -3    0.82    0.78
   4   0   4 1650.48   58.48
   4   0   4 1640.84   58.75
  -4   0  -4 1716.71   66.26
  -4   0  -4 1824.81   63.67
  -4   0  -4 1564.36   60.16
   4   0   5    0.82    0.72
   4   0   5    0.43    0.86
  -4   0  -5   -0.46    1.68
  -4   0  -5    0.24    0.89
   4   0   5    1.43    0.93
   4   0   6  406.25   17.93
  -4   0  -6  421.58   20.91
  -4   0  -6  401.93   24.96
   4   0   6  412.73   17.56
  -4   0  -7    0.96    1.03
   4   0   7    0.56    0.86
  -4   0  -7    0.45    0.63
  -4   0  -7    0.72    1.11
   4   0   7    0.83    0.89
  -4   0  -8  456.13   21.44
   4   0   8  502.45   21.74
   4   0   8  481.80   19.77
  -4   0  -8  461.47   19.46
  -4   0  -8  526.86   26.47
   4   0   8  498.30   20.99
   4   0   9    5.44    1.49
   4   0   9    2.34    1.42
  -4   0  -9    1.34    1.00
  -4   0  -9    2.64    1.64
   4   0   9    4.51    1.66
   4   0  10  212.08   12.45
   4   0  10  199.48   10.29
  -4   0 -10  205.71   10.63
  -4   0 -10  199.75   12.25
   4   0  10  207.86   11.49
   4   0  11    1.28    1.52
   4   0  11    1.52    0.94
  -4   0 -11    0.78    0.87
   4   0  11    0.60    1.12
  -4   0 -11    0.94    1.57
  -4   0 -11    2.60    1.58
  -4   0 -11   -0.71    1.40
  -4   0 -12  505.18   24.33
  -4   0 -12  487.09   22.93
   4   0  12  544.12   23.43
  -4   0 -13    5.88    2.28
   4   0  13    3.40    1.71
  -4   0 -14   36.27    4.40
   4   0  14   25.06    3.42
   4   0  15    0.46    0.82
   4   0  15    0.29    0.93
  -4   0 -15    0.73    1.22
  -4   0 -16   14.87    2.10
  -4  -1  17    7.64    1.71
  -4   1  17    5.70    1.55
   4   1 -16   84.35    5.47
  -4   1  16   98.21    6.91
  -4  -1  16   88.97    6.62
   4  -1 -16   96.68    6.38
   4   1 -15   30.60    3.44
   4  -1 -15   34.88    4.45
  -4   1  15   36.88    4.40
  -4  -1  15   36.66    4.33
  -4  -1  14    5.72    2.06
  -4   1  14    4.78    1.83
   4   1 -14    4.82    1.77
  -4   1  14    1.49    2.94
  -4  -1  14    0.74    2.72
   4   1 -14    6.33    2.80
   4  -1 -14    7.75    3.00
   4   1 -14    5.57    1.88
   4   1 -14    5.97    1.95
   4  -1 -14    6.73    2.03
   4   1 -14    5.20    3.39
   4  -1 -14    5.52    4.61
   4   1 -14    2.24    4.12
   4  -1 -13  126.27   17.97
   4   1 -13  152.15   19.56
  -4   1  13  179.83   11.04
  -4  -1  13  140.50   10.08
   4   1 -13  158.35    9.80
  -4   1  13  149.32   16.12
  -4  -1  13  167.41   16.73
   4  -1 -13  176.60   12.73
   4   1 -13  159.31   12.33
   4   1 -13  142.70   16.15
   4   1 -13  180.02   10.23
   4  -1 -13  198.46   11.39
   4  -1 -13  197.00   11.59
   4   1 -13  206.13   17.53
   4   1 -12  425.96   36.50
   4  -1 -12  453.33   36.89
  -4  -1  12  623.45   25.78
  -4   1  12  643.66   26.85
  -4  -1  12  572.14   26.19
   4  -1 -12  659.47   27.20
  -4   1  12  648.85   36.31
  -4  -1  12  595.47   35.16
   4   1 -12  609.83   25.69
   4   1 -12  598.73   29.13
   4  -1 -12  551.69   28.46
   4   1 -12  597.77   35.98
   4   1 -12  562.42   24.56
   4  -1 -12  722.50   27.88
   4  -1 -12  738.46   28.48
   4   1 -12  771.60   37.37
   4   1 -11  603.57   42.77
   4  -1 -11  541.44   40.90
  -4  -1  11  733.61   30.55
   4  -1 -11  937.50   33.34
   4  -1 -11  789.45   32.02
   4   1 -11  769.53   30.87
  -4   1  11  687.47   39.20
  -4  -1  11  699.38   39.19
   4   1 -11  630.98   39.18
   4  -1 -11  671.38   33.03
   4   1 -11  725.80   33.76
   4   1 -11  861.08   31.25
   4  -1 -11  901.90   33.14
   4   1 -11  702.27   29.90
   4  -1 -11  933.17   33.75
   4  -1 -11  950.08   46.87
   4   1 -11  944.30   42.07
   4  -1 -10   10.76    4.61
   4   1 -10   11.86    4.87
  -4  -1  10    3.84    1.39
   4  -1 -10    5.86    2.00
   4  -1 -10    4.15    2.32
   4   1 -10    2.41    2.23
   4   1 -10    5.68    2.14
   4  -1 -10   16.96    3.31
   4   1 -10    5.69    1.50
   4  -1 -10    6.10    2.09
   4   1 -10    5.34    1.64
   4  -1 -10    8.71    2.21
   4   1 -10    6.90    1.59
   4   1 -10    5.86    1.71
   4  -1 -10    8.46    2.35
   4  -1 -10    3.76    3.32
   4   1 -10    9.40    3.57
   4   1  -9  360.33   27.03
   4  -1  -9  324.47   25.92
  -4  -1   9  417.29   18.06
   4   1  -9  409.57   18.12
  -4   1   9  392.04   24.07
   4   1  -9  415.06   18.08
   4  -1  -9  517.70   20.50
  -4  -1   9  377.12   23.66
   4   1  -9  365.42   24.40
   4   1  -9  406.83   20.10
   4  -1  -9  390.13   19.87
   4  -1  -9  320.86   21.54
   4  -1  -9  427.77   18.65
   4  -1  -9  490.40   20.36
   4  -1  -9  477.02   20.12
   4   1  -9  459.00   18.33
   4   1  -9  416.37   17.87
   4   1  -9  420.41   17.48
   4  -1  -9  443.37   18.64
  -4  -1   9  408.81   17.13
   4   1  -9  548.22   26.75
   4  -1  -9  523.66   30.28
   4   1  -8 1296.79   47.01
  -4  -1   8  946.41   36.51
   4  -1  -8 1188.32   50.55
   4  -1  -8 1268.13   40.75
   4   1  -8 1015.16   37.74
  -4  -1   8  935.60   43.82
  -4   1   8 1082.82   45.34
   4   1  -8  979.83   37.74
   4   1  -8  896.82   44.65
   4  -1  -8  820.74   41.78
   4  -1  -8 1062.11   39.51
   4  -1  -8  974.80   38.19
   4   1  -8 1101.07   38.02
   4   1  -8 1017.98   37.79
   4   1  -8  994.49   37.19
   4  -1  -8 1051.63   38.34
   4   1  -8  911.76   48.06
   4  -1  -7  784.04   42.16
   4   1  -7  905.21   43.64
  -4  -1   7  971.01   34.13
   4  -1  -7  902.39   34.70
   4   1  -7  877.28   33.88
   4   1  -7  910.05   33.54
  -4   1   7  929.45   40.26
  -4  -1   7  822.24   39.12
   4  -1  -7 1037.86   36.55
   4   1  -7  918.67   34.02
   4   1  -7  874.92   40.74
   4  -1  -7  891.35   35.09
   4   1  -7  988.96   34.23
   4  -1  -7  827.21   34.24
   4   1  -7  924.23   33.59
   4  -1  -7  859.50   34.21
   4   1  -7 1124.53   41.98
   4  -1  -7  979.48   44.07
   4  -1  -6  652.68   32.84
   4   1  -6  725.98   33.77
  -4  -1   6  705.18   25.24
   4   1  -6  671.53   25.24
   4  -1  -6  627.32   25.87
  -4  -1   6  657.86   30.10
  -4   1   6  749.57   30.99
   4   1  -6  640.13   25.26
   4  -1  -6  605.77   25.60
   4  -1  -6  651.26   25.53
   4   1  -6  630.07   29.26
   4   1  -6  788.99   31.84
   4  -1  -6  624.14   31.91
   4   1  -6  692.53   31.53
   4   1  -5  260.08   14.90
   4  -1  -5  207.50   14.34
   4  -1  -5  253.98   16.18
   4   1  -5  266.18   16.38
   4   1  -5  242.79   14.11
   4   1  -4 1560.20   60.16
   4  -1  -4 1496.24   59.26
   4   1  -4 1479.25   59.88
   4   1  -4 1779.73   63.04
   4  -1  -4 1768.97   62.91
   4  -1  -3  366.61   18.89
   4   1  -3  368.80   18.98
  -4   1   3  402.45   16.60
   4  -1  -2 1506.21   53.97
   4   1  -2 1507.86   54.03
  -4   1   2 1415.05   50.15
  -4  -1   2 1606.10   53.46
   4   1  -1 2653.37   83.54
   4  -1  -1 2656.67   83.63
  -4  -1   1 2825.35   84.68
   4  -1   0 1206.52   42.88
   4   1   0 1167.06   42.80
  -4  -1  -1  121.00    7.81
  -4   1  -1  104.54    5.33
   4   1   1  108.48    7.92
   4  -1   1  107.02    7.92
  -4   1  -2  502.13   20.04
  -4  -1  -2  641.00   24.84
   4   1   2  650.69   23.63
  -4   1  -2  470.33   19.40
  -4  -1  -3   19.33    3.60
   4   1   3   14.42    2.51
  -4   1  -3   14.16    2.00
   4  -1   4  157.95    8.14
   4  -1   4  155.79    8.23
   4   1   4  159.92    8.37
  -4  -1  -4  139.44   12.04
  -4   1  -4  170.32   12.96
   4   1   4  174.02    9.73
  -4   1  -4  144.33    8.64
  -4  -1  -4  162.01   11.63
  -4  -1  -5   83.00    8.43
  -4   1  -5   74.39    8.69
   4  -1   5   84.45    5.50
   4   1   5   63.53    4.99
   4   1   5   66.12    4.44
   4   1   5   71.98    5.83
  -4   1  -5   74.98    6.15
   4  -1   5   91.77    5.62
   4   1   5   59.89    4.55
  -4   1  -6 1488.35   67.83
   4   1   6 1736.42   59.31
   4  -1   6 1704.01   59.06
  -4  -1  -6 1390.89   56.88
   4   1   6 1718.76   57.57
   4   1   6 1815.34   60.16
  -4   1  -6 1697.40   61.85
   4  -1   6 1630.15   58.73
   4   1   6 1636.10   58.26
  -4   1  -7  388.85   18.69
  -4  -1  -7  387.85   18.42
   4  -1   7  464.92   18.91
   4   1   7  419.03   18.09
   4  -1   7  460.81   19.15
   4   1   7  452.85   19.19
   4  -1   7  432.72   16.98
  -4  -1  -7  382.71   17.07
   4   1   7  408.94   17.12
  -4   1  -7  444.66   21.96
  -4   1  -8   28.96    3.95
  -4  -1  -8   28.33    3.76
   4  -1   8   27.60    3.52
   4   1   8   42.08    4.07
   4  -1   8   36.80    4.18
   4   1   8   32.41    4.04
  -4   1  -8   28.59    2.90
   4   1   8   31.97    3.11
  -4  -1  -8   33.04    3.33
  -4   1  -8   39.76    5.88
  -4  -1  -9    0.69    1.27
  -4   1  -9    0.74    1.08
   4   1   9    4.38    1.76
   4  -1   9    3.49    1.65
   4   1   9    2.41    1.02
  -4   1  -9    2.45    1.17
  -4   1  -9    3.51    2.29
   4  -1   9    3.87    1.60
   4   1   9    1.85    1.24
  -4   1 -10  382.08   19.53
  -4  -1 -10  376.16   19.06
   4   1  10  426.53   19.55
   4   1  10  399.54   17.69
  -4   1 -10  401.52   17.06
  -4   1 -10  415.14   23.95
   4  -1  10  380.56   18.34
   4  -1  11  199.99   11.21
  -4  -1 -11  188.03   11.72
  -4  -1 -11  170.83   16.43
  -4   1 -11  197.38   18.77
  -4   1 -11  200.93   13.00
  -4  -1 -11  178.99   12.59
  -4   1 -11  213.97   12.54
   4   1  11  190.04   11.65
   4   1  11  184.96   10.12
   4  -1  12  180.17   10.19
  -4   1 -12  160.18   16.52
  -4  -1 -12  171.20   11.95
  -4   1 -12  174.81   11.84
  -4  -1 -12  174.37   10.81
   4   1  12  161.59    8.91
   4   1  12  168.23   10.70
  -4   1 -13  109.34    8.76
  -4  -1 -13  115.57    8.20
   4   1  13  127.98    8.50
   4  -1  13  119.72    8.31
   4   1  14  242.74   11.66
  -4   1 -14  274.81   13.89
   4  -1  14  229.48   12.26
   4   1  14  235.42   12.32
   4  -1  15   29.33    3.02
   4   1  15   21.95    2.74
   4  -1  15   30.39    3.15
  -4   1 -15   26.63    3.33
  -4  -1 -15   24.05    3.27
  -4   1 -16   28.24    2.79
  -4  -1 -16   30.92    2.92
   4  -2 -17   32.28    2.76
   4   2 -17   31.70    2.85
  -4  -2  17   32.59    3.08
  -4   2  17   38.25    3.33
   4  -2 -16  226.66   11.23
   4   2 -16  188.55    9.10
  -4   2  16  201.11   10.67
  -4  -2  16  187.96   10.33
  -4  -2  16  192.92    9.83
   4   2 -15  357.64   15.65
   4  -2 -15  404.00   18.63
   4   2 -15  345.72   15.85
   4   2 -15  356.08   15.95
  -4   2  15  361.59   17.27
  -4  -2  15  335.08   16.79
  -4  -2  14  175.43   10.84
  -4   2  14  203.31   11.61
   4   2 -14  171.58    9.87
  -4   2  14  186.36   17.90
  -4  -2  14  166.92   16.81
   4   2 -14  173.55    9.87
   4   2 -14  192.56   13.12
   4  -2 -14  185.27   12.88
   4   2 -14  176.02   18.34
   4   2 -14  183.28    9.92
   4   2 -14  225.74   17.51
   4  -2 -14  131.91   18.30
   4   2 -14  125.83   18.23
   4  -2 -13   12.57    6.37
   4   2 -13    2.14    3.67
  -4  -2  13   11.99    2.66
  -4   2  13   10.10    2.56
  -4  -2  13   10.76    2.57
   4   2 -13   10.98    2.30
  -4   2  13   12.31    5.05
  -4  -2  13   11.06    4.82
   4   2 -13    6.70    3.88
   4   2 -13    8.61    3.09
   4  -2 -13    6.69    2.83
   4   2 -13   11.14    2.32
   4  -2 -13    7.74    2.35
   4  -2 -13    9.88    2.77
   4   2 -13   11.92    4.40
   4  -2 -12   88.03   14.20
   4   2 -12   99.18   15.32
  -4  -2  12  134.93    8.72
  -4   2  12  123.93    8.65
  -4  -2  12  121.37    8.41
   4   2 -12  128.04    8.01
   4   2 -12  109.41    7.60
  -4   2  12  123.77   13.82
  -4  -2  12  111.00   12.96
   4   2 -12  116.03    9.92
   4  -2 -12  105.54    9.40
   4   2 -12   96.24   13.44
   4  -2 -12  131.68    9.40
   4   2 -12  115.88    7.19
   4  -2 -12  146.31   10.29
   4   2 -12  149.38   14.04
   4  -2 -11   22.70    7.00
   4   2 -11   30.22    7.95
  -4  -2  11   31.86    3.94
  -4  -2  11   30.07    3.91
  -4   2  11   35.58    4.21
  -4  -2  11   29.45    6.34
   4   2 -11   31.17    3.58
  -4   2  11   31.51    6.65
   4  -2 -11   24.28    4.40
   4   2 -11   26.73    4.53
   4   2 -11   24.77    6.52
   4  -2 -11   32.47    4.45
   4   2 -11   31.34    3.34
   4  -2 -11   38.51    5.14
   4   2 -11   46.00    7.41
   4  -2 -10  524.11   37.70
   4   2 -10  569.29   39.26
  -4  -2  10  737.25   28.93
  -4   2  10  680.94   36.35
   4   2 -10  682.16   28.03
  -4  -2  10  627.42   35.31
   4   2 -10  643.73   37.92
   4   2 -10  645.81   30.47
   4  -2 -10  664.72   30.55
   4  -2 -10  867.64   32.35
   4   2 -10  788.24   28.51
   4   2 -10  674.29   27.40
   4  -2 -10  809.40   32.45
   4   2 -10  910.59   38.38
   4   2  -9  192.58   18.50
   4  -2  -9  157.43   16.75
  -4  -2   9  213.97   11.26
   4   2  -9  215.07   10.93
  -4  -2   9  205.42   10.34
   4   2  -9  283.07   17.89
   4   2  -9  220.91   10.98
   4   2  -9  229.77   11.14
   4  -2  -9  271.73   14.65
   4  -2  -9  236.93   13.96
   4   2  -9  215.82   10.17
   4   2  -9  200.13   17.29
   4  -2  -9  197.45   12.34
   4   2  -9  219.54   12.91
  -4  -2   8  517.43   20.62
   4   2  -8  639.88   29.61
   4  -2  -8  589.36   24.34
  -4   2   8  509.47   27.25
  -4  -2   8  506.15   26.86
   4   2  -8  485.93   21.06
   4   2  -8  539.11   20.69
   4   2  -8  478.73   21.07
   4   2  -8  518.39   21.40
   4   2  -8  507.68   21.27
   4  -2  -8  689.96   27.50
   4   2  -8  519.55   21.27
   4   2  -8  528.54   20.54
   4   2  -8  538.02   25.65
   4  -2  -8  529.95   24.54
   4  -2  -8  493.92   30.33
   4   2  -8  530.57   31.26
   4  -2  -7  350.57   22.63
   4   2  -7  342.79   22.48
  -4  -2   7  378.06   15.58
   4   2  -7  369.28   14.70
   4   2  -7  344.48   15.14
  -4  -2   7  371.82   20.12
   4  -2  -7  413.12   18.63
  -4   2   7  391.12   20.82
   4   2  -7  344.70   15.03
  -4  -2   7  340.11   13.87
   4   2  -7  342.47   15.23
   4   2  -7  359.29   15.29
   4   2  -7  347.32   15.12
   4   2  -7  345.80   15.11
   4  -2  -7  332.22   15.77
   4   2  -7  332.30   18.54
   4  -2  -7  301.24   16.72
  -4  -2   7  357.56   14.51
   4   2  -7  411.64   21.96
   4  -2  -6  326.77   20.18
   4   2  -6  327.41   20.17
  -4  -2   6  353.91   14.14
   4   2  -6  333.35   13.34
   4  -2  -6  364.35   17.91
   4   2  -6  303.72   13.55
  -4  -2   6  335.74   17.87
  -4   2   6  368.93   18.65
   4   2  -6  329.41   19.75
   4  -2  -6  384.55   21.90
   4   2  -6  311.60   13.85
   4   2  -6  311.47   13.67
   4  -2  -6  289.08   14.25
   4   2  -6  301.87   17.07
   4  -2  -6  257.17   14.38
   4   2  -6  350.91   19.79
   4   2  -5 1301.75   51.37
   4  -2  -5 1284.37   51.14
  -4  -2   5 1285.18   43.97
  -4  -2   5 1324.65   48.56
   4   2  -5 1235.64   43.67
   4  -2  -5 1176.71   52.93
   4   2  -5 1165.19   43.53
   4   2  -5 1272.18   48.67
   4  -2  -5 1055.72   44.32
   4   2  -5 1334.39   51.48
   4   2  -5 1330.78   50.87
   4   2  -4  118.07    9.18
  -4  -2   4  108.01    9.20
   4   2  -4  115.60    9.47
   4   2  -4  113.74    9.44
   4  -2  -4  108.52    9.17
  -4   2   3   21.64    2.26
  -4  -2   3   12.56    2.92
   4  -2  -3   17.00    3.32
   4   2  -3   14.38    3.14
   4  -2  -2  146.99    9.84
   4   2  -2  157.97   10.27
   4   2  -2  126.69    8.20
   4   2  -1  902.68   35.69
   4  -2  -1  919.44   35.89
   4   2   0  107.82    7.62
   4  -2   0  107.29    7.61
  -4  -2  -1  318.37   17.86
   4   2   1  359.24   17.46
   4  -2   1  366.81   17.73
   4   2   1  370.49   18.14
  -4   2  -1  326.54   14.28
  -4  -2  -2 1496.24   57.45
   4   2   2 1497.91   55.59
  -4   2  -2 1365.66   52.46
   4   2   2 1467.67   56.54
   4  -2   2 1499.72   56.79
   4  -2   3  523.88   20.70
   4   2   3  563.27   24.51
  -4   2  -3  487.47   22.29
  -4  -2  -3  527.21   26.18
  -4  -2  -3  564.52   26.88
  -4   2  -3  535.06   26.39
  -4  -2  -4 1024.27   44.65
  -4   2  -4 1037.04   44.40
   4  -2   4  986.96   37.15
   4   2   4 1051.02   37.50
   4  -2   4  989.87   37.17
  -4  -2  -4 1043.64   44.03
  -4   2  -4  884.89   38.78
   4   2   4 1106.83   41.41
  -4  -2  -5  360.10   22.25
  -4   2  -5  341.67   21.91
   4   2   5  354.82   15.76
   4  -2   5  372.07   15.76
  -4  -2  -5  337.34   15.16
  -4  -2  -5  373.07   21.64
   4   2   5  353.82   18.43
  -4   2  -5  360.46   17.75
  -4   2  -6   37.93    6.79
  -4  -2  -6   30.59    6.18
   4  -2   6   37.13    3.71
   4   2   6   41.39    3.97
   4  -2   6   32.52    3.65
  -4  -2  -6   30.31    3.36
  -4  -2  -6   31.54    5.81
   4   2   6   37.40    5.02
  -4   2  -6   38.33    4.85
   4  -2   7  134.89    8.18
   4   2   7  122.99    7.94
   4  -2   7  142.32    8.24
   4   2   7  115.90    9.23
  -4   2  -7  128.19    9.77
  -4  -2  -7  112.84    7.60
   4  -2   8  426.77   19.26
   4  -2   8  425.10   19.22
   4   2   8  476.73   19.86
   4   2   8  438.59   17.96
  -4   2  -8  438.62   22.58
  -4   2  -9  161.28   10.49
  -4  -2  -9  192.80   10.65
   4  -2   9  189.70   11.00
   4  -2   9  204.94   11.39
   4   2   9  168.83   10.64
   4   2   9  163.04    9.17
  -4   2  -9  209.92   14.44
   4  -2  10  554.57   24.09
   4   2  10  562.48   24.15
   4   2  10  524.52   21.42
  -4  -2 -10  524.12   25.47
  -4   2 -10  546.82   25.62
  -4   2 -10  495.54   23.62
   4  -2  10  528.59   23.60
  -4  -2 -10  553.17   23.31
   4  -2  11  308.15   15.77
   4   2  11  305.88   15.76
   4   2  11  294.02   14.60
  -4   2 -11  252.76   22.90
  -4   2 -11  308.28   17.08
  -4  -2 -11  291.04   16.87
   4  -2  11  280.45   15.01
  -4  -2 -11  329.02   15.18
   4  -2  12   76.43    6.62
   4   2  12   96.83    7.28
   4   2  12   87.06    6.24
  -4   2 -12   93.47    8.01
  -4  -2 -12   85.36    7.78
  -4   2 -12   80.32   11.72
   4  -2  12   86.22    6.67
  -4  -2 -12   83.65    6.22
   4   2  12   91.74    6.69
   4   2  13    7.13    1.84
   4   2  13    7.22    1.63
   4  -2  13    9.56    2.10
  -4   2 -13    6.18    2.22
  -4  -2 -13    7.63    2.41
   4  -2  13    7.03    1.91
   4   2  14   66.88    5.16
   4  -2  14   54.55    4.74
  -4  -2 -14   74.12    6.10
  -4   2 -14   64.60    5.69
   4  -2  15   32.65    3.05
   4   2  15   31.31    3.07
  -4   2 -15   42.37    3.88
  -4  -2 -15   38.28    3.75
   4  -2  15   40.16    3.50
  -4   2 -16   77.59    4.24
   4  -3 -17  117.12    6.06
   4   3 -17  111.95    5.73
   4  -3 -16   45.79    4.39
   4   3 -16   42.34    3.48
  -4   3  16   39.90    3.69
  -4  -3  16   33.40    3.40
   4   3 -15  221.69   10.75
  -4   3  15  218.97   11.93
  -4  -3  15  224.62   11.86
   4   3 -15  236.59   11.20
   4   3 -15  235.25   11.24
  -4   3  14   67.58    5.98
  -4  -3  14   55.47    5.31
   4  -3 -14   72.63    7.10
   4   3 -14   60.69    5.01
   4   3 -14   55.33    4.76
   4   3 -13   74.76   12.44
   4   3 -13   93.79    6.41
   4   3 -13   88.45    6.32
  -4   3  13   78.32   11.51
  -4  -3  13   78.83   11.11
  -4   3  13   83.12    7.01
  -4  -3  13   86.07    6.85
  -4  -3  13   81.70    6.91
   4   3 -13   56.96   11.62
   4  -3 -13   67.94   12.50
   4   3 -13  102.02   11.16
   4   3 -12   25.16    4.40
   4   3 -12   26.98    7.41
   4  -3 -12   20.11    3.98
  -4   3  12   30.56    7.08
  -4  -3  12   21.27    5.80
   4   3 -12   19.41    2.91
   4   3 -12   24.90    3.26
  -4  -3  12   24.37    3.56
  -4   3  12   32.65    4.20
  -4  -3  12   25.72    3.72
   4   3 -12   26.08    2.99
   4  -3 -12   21.90    7.18
   4   3 -12   15.51    6.52
   4   3 -12   30.85    6.33
   4   3 -11  105.63    8.96
   4  -3 -11  100.58    8.69
  -4   3  11  113.00    8.00
  -4  -3  11  107.51    7.64
  -4  -3  11  118.82    8.18
   4   3 -11  107.46    7.27
   4   3 -11  114.16    7.38
  -4   3  11  117.71   13.13
  -4  -3  11   96.02   11.52
   4  -3 -11  128.80    9.63
   4   3 -11  111.47    6.85
   4   3 -11  138.26   12.91
   4   3 -11   81.87   13.12
   4  -3 -11   96.41   13.87
   4  -3 -10    3.98    3.13
   4   3 -10    2.50    2.84
   4   3 -10    3.96    1.89
   4  -3 -10    2.73    1.78
  -4  -3  10    4.50    1.64
  -4   3  10    1.21    1.26
  -4  -3  10    1.31    0.98
  -4   3  10    2.34    2.16
  -4  -3  10    0.54    1.31
  -4  -3  10    1.58    1.06
   4   3 -10    1.65    0.92
   4   3 -10    1.57    0.89
   4   3 -10    0.34    0.94
   4  -3 -10    3.04    2.16
   4   3 -10    2.21    1.28
  -4  -3  10    1.32    1.15
   4   3 -10    1.06    1.96
   4   3  -9  522.12   33.03
   4   3  -9  528.29   25.42
   4  -3  -9  538.62   25.34
  -4  -3   9  581.09   24.40
   4   3  -9  582.39   23.72
  -4   3   9  611.69   31.90
  -4  -3   9  578.60   30.71
  -4  -3   9  609.66   22.91
   4   3  -9  562.44   23.56
   4   3  -9  618.86   24.21
   4  -3  -9  756.38   31.27
   4   3  -9  581.12   23.62
  -4  -3   9  610.17   23.67
   4   3  -9  657.71   32.74
   4   3  -9  456.80   32.65
   4  -3  -9  461.39   32.28
   4   3  -8  157.29   15.63
   4  -3  -8  150.19   14.97
   4   3  -8  170.77   15.64
  -4  -3   8  175.54    9.60
   4   3  -8  153.28    8.87
  -4  -3   8  173.57    8.38
   4   3  -8  174.94    9.41
   4   3  -8  170.16    9.14
   4   3  -8  158.72    8.87
   4   3  -8  169.16    9.12
   4   3  -8  158.11   11.79
  -4  -3   8  180.39    9.03
   4   3  -8  189.95   14.97
   4  -3  -7  310.36   21.79
   4   3  -7  319.92   22.27
   4   3  -7  327.27   22.21
   4   3  -7  363.84   14.48
   4   3  -7  350.21   15.10
  -4   3   7  346.40   19.96
  -4  -3   7  344.07   19.46
  -4  -3   7  327.04   14.15
   4   3  -7  352.18   15.18
   4   3  -7  340.34   15.25
   4   3  -7  338.87   15.09
   4   3  -7  357.37   19.02
   4   3  -7  396.97   22.87
  -4  -3   6    1.72    0.89
   4   3  -6    0.87    1.49
  -4  -3   6   -0.32    1.16
  -4   3   6   -0.34    1.50
   4   3  -6    1.12    0.80
   4   3  -6    0.95    1.75
   4   3  -6    0.47    0.88
   4   3  -6    0.76    0.73
   4   3  -6    1.28    0.89
   4   3  -6    1.23    0.89
   4  -3  -6    1.27    2.79
   4   3  -6    0.62    1.29
   4  -3  -6    0.92    1.69
   4   3  -6    2.36    2.08
   4   3  -5  113.37   10.07
  -4  -3   5  118.46    6.31
   4   3  -5  105.42    6.11
  -4   3   5  147.00   10.03
  -4  -3   5  110.75    8.51
  -4  -3   5  120.78   10.74
   4   3  -5  122.72   10.81
   4  -3  -5  103.16   10.32
   4   3  -5  102.98    6.07
   4   3  -5   97.39    5.79
   4   3  -5  101.10    5.77
   4   3  -5  114.24   10.30
   4  -3  -5  115.51   10.08
   4  -3  -4  335.19   18.40
   4   3  -4  353.59   19.14
  -4  -3   4  336.97   14.19
   4   3  -4  328.14   13.58
  -4  -3   4  357.11   19.74
   4   3  -4  363.94   19.72
   4   3  -4  345.05   13.85
   4  -3  -4  328.59   16.76
   4   3  -4  315.55   13.91
   4   3  -4  304.59   13.55
   4   3  -4  321.16   13.79
   4   3  -4  367.27   18.92
  -4  -3   4  356.10   13.97
   4  -3  -3 1981.45   73.32
   4   3  -3 2166.84   74.61
  -4  -3   3 2332.04   75.96
  -4  -3   3 2103.79   68.82
   4   3  -3 1864.68   68.15
   4   3  -3 2042.35   68.37
   4   3  -3 1899.62   68.30
   4   3  -3 1810.83   68.33
   4   3  -3 1936.95   73.19
   4   3  -2   17.93    2.03
  -4  -3   2   14.58    1.84
   4   3  -2   10.42    1.74
  -4  -3   2   16.03    3.35
  -4  -3   1  113.02    8.96
   4   3  -1  100.80    9.18
   4   3   0   80.50    6.51
   4  -3   0   86.17    6.68
   4   3   1  628.97   25.70
   4   3   1  700.74   29.09
  -4  -3  -1  659.05   32.04
  -4  -3  -2  348.26   15.57
  -4  -3  -2  350.83   15.44
   4   3   2  350.72   18.79
   4  -3   2  392.81   19.51
   4   3   2  416.37   20.79
  -4   3  -2  363.67   17.15
  -4  -3  -2  389.08   21.87
  -4  -3  -2  369.50   19.92
  -4   3  -2  364.44   19.80
  -4  -3  -3  882.06   38.69
  -4   3  -3  861.30   38.57
  -4   3  -3  848.18   35.07
   4   3   3  835.05   37.37
   4  -3   3  806.84   37.32
   4  -3   3  845.67   32.04
  -4  -3  -3  864.83   32.57
   4   3   3  917.28   38.15
  -4  -3  -3  889.86   40.32
  -4  -3  -4   54.45    7.81
  -4   3  -4   74.25    8.59
  -4  -3  -4   68.03    8.35
   4  -3   4   72.62    5.17
   4   3   4   72.69    5.17
   4  -3   4   74.32    5.24
  -4  -3  -4   74.40    5.45
   4   3   4   86.03    8.49
  -4   3  -4   62.64    6.49
  -4  -3  -5  869.29   41.16
  -4  -3  -5  854.07   40.88
  -4   3  -5  835.49   40.25
   4  -3   5  890.37   32.37
  -4  -3  -5  805.03   32.15
   4   3   5  784.36   31.71
   4  -3   5  839.82   31.86
   4   3   5  909.25   38.16
  -4   3  -5  735.76   34.87
  -4  -3  -6   99.57   11.04
   4  -3   6   80.85    5.98
   4   3   6   91.79    6.34
   4  -3   6   87.56    6.42
  -4  -3  -6   80.52    6.15
   4   3   6   88.06    9.13
  -4   3  -6   74.20    7.65
  -4  -3  -7   90.44    6.63
   4   3   7   92.38    6.60
   4  -3   7   74.05    5.92
  -4  -3  -7   78.98    6.33
   4   3   7   81.53    8.79
  -4   3  -7   78.38    7.84
  -4  -3  -8    0.64    1.08
   4  -3   8    1.02    1.20
   4   3   8    0.85    1.25
   4   3   8    3.53    1.97
  -4   3  -8    1.80    1.66
  -4   3  -8    0.70    0.81
  -4  -3  -8    0.64    1.15
  -4  -3  -9 1390.39   55.18
   4   3   9 1522.85   55.67
   4  -3   9 1488.24   55.32
  -4  -3  -9 1504.21   55.43
   4  -3   9 1483.47   55.58
   4   3   9 1429.10   53.79
  -4   3  -9 1541.91   60.07
   4  -3  10  213.40   12.70
  -4  -3 -10  242.81   12.96
   4  -3  10  217.80   12.58
   4   3  10  251.88   13.25
   4   3  10  223.07   11.45
  -4  -3 -10  219.21   12.76
  -4   3 -10  209.50   21.26
  -4  -3 -10  235.93   14.21
  -4   3 -10  229.06   14.05
   4  -3  11   69.76    5.85
  -4  -3 -11   75.33    6.44
  -4   3 -11   70.96    6.98
  -4  -3 -11   68.01    6.87
   4  -3  11   68.03    6.08
   4   3  11   71.17    6.23
   4   3  11   69.12    5.83
   4  -3  11   66.57    6.09
  -4  -3 -11   71.26    6.04
   4   3  11   59.38    4.75
  -4  -3 -11   60.30    5.49
  -4  -3 -12   28.87    3.79
  -4  -3 -12   28.35    4.32
  -4   3 -12   26.75    4.22
   4   3  12   28.22    3.82
   4   3  12   28.03    3.47
   4  -3  12   28.32    3.75
   4  -3  12   33.54    4.03
  -4  -3 -12   27.68    3.46
  -4   3 -13  310.43   15.39
  -4  -3 -13  317.07   15.54
  -4  -3 -13  283.42   14.09
   4   3  13  299.40   14.11
   4  -3  13  283.92   13.74
   4   3  13  274.29   13.19
   4  -3  13  281.36   13.81
  -4   3 -14   41.08    4.10
   4   3  14   41.40    3.61
   4  -3  14   29.19    3.05
  -4  -3 -14   39.02    3.90
  -4  -3 -15  106.71    5.91
  -4   3 -15  103.79    5.73
  -4  -4  17    2.14    0.89
   4  -4 -17    1.74    0.74
   4   4 -16    2.61    0.92
   4  -4 -16    3.16    1.23
  -4  -4  16    2.57    1.08
   4   4 -16    2.60    0.94
   4  -4 -16    3.84    1.39
   4   4 -15   54.40    3.89
   4   4 -15   60.68    4.34
   4  -4 -15   67.49    5.61
   4  -4 -15   69.66    6.10
   4   4 -15   51.57    3.91
   4   4 -15   59.71    4.30
   4  -4 -14   37.13    5.01
  -4   4  14   28.71    3.46
   4   4 -14   30.37    3.20
   4   4 -14   29.32    3.20
  -4  -4  13  156.62    9.77
  -4   4  13  164.16    9.87
   4   4 -13  184.38   15.03
   4  -4 -13  186.33   12.45
   4   4 -13  159.84    9.18
   4   4 -13  171.22    9.30
  -4  -4  12   20.89    6.64
  -4  -4  12   24.83    6.86
   4   4 -12   40.16    4.08
   4   4 -12   37.64    4.00
  -4  -4  12   46.81    4.99
  -4  -4  12   35.72    4.35
  -4   4  12   39.65    4.53
   4  -4 -12   22.27    6.85
   4   4 -12   53.11    8.03
   4   4 -11    9.59    4.73
  -4  -4  11    6.81    3.97
  -4  -4  11   20.53    3.31
  -4  -4  11   15.04    2.81
  -4   4  11   21.03    3.28
   4   4 -11   16.01    2.65
  -4  -4  11   22.12    5.59
  -4   4  11   20.20    5.44
   4   4 -11   19.79    2.91
   4   4 -11   16.88    2.42
   4  -4 -11   14.74    5.37
   4   4 -11   11.40    4.84
   4   4 -11   12.81    4.21
   4   4 -10   37.78    8.33
  -4  -4  10   30.58    7.36
  -4  -4  10   36.11    4.13
  -4  -4  10   35.06    4.26
  -4   4  10   37.68    4.19
  -4   4  10   35.64    6.86
  -4  -4  10   34.51    6.77
   4   4 -10   39.67    4.11
   4   4 -10   38.07    3.99
  -4  -4  10   37.16    3.75
   4   4 -10   48.29    4.37
   4   4 -10   37.39    3.83
  -4  -4  10   35.94    3.96
   4   4 -10   40.21    7.51
   4  -4 -10   20.59    6.12
   4   4 -10   20.10    5.92
   4  -4  -9  686.77   43.56
   4   4  -9  668.85   43.50
   4   4  -9  925.98   48.54
  -4  -4   9  780.33   45.90
  -4  -4   9  947.17   35.79
  -4   4   9  943.17   35.78
   4   4  -9  959.78   35.74
  -4   4   9  935.95   43.85
  -4  -4   9  933.97   43.80
   4   4  -9  911.50   35.73
  -4  -4   9  955.83   34.87
   4   4  -9  952.24   35.62
   4   4  -9  924.24   35.42
   4   4  -9  887.32   35.73
   4   4  -9  922.60   35.46
   4   4  -9  987.02   40.42
  -4  -4   9  959.46   35.76
   4   4  -9 1049.28   46.47
   4   4  -8  154.05   15.57
  -4  -4   8  144.93   14.98
  -4  -4   8  168.82    9.01
   4   4  -8  167.68   15.04
   4   4  -8  166.01    9.02
  -4  -4   8  160.43   13.26
  -4   4   8  152.59   13.06
  -4  -4   8  155.43    8.29
   4   4  -8  156.85    8.86
   4   4  -8  151.32    8.85
   4   4  -8  145.69    8.72
   4   4  -8  154.04   11.72
   4  -4  -8  124.57   13.74
   4   4  -8  126.44   13.86
   4  -4  -7   58.17    5.79
  -4  -4   7   45.03    7.83
   4   4  -7   42.25    7.59
  -4  -4   7   51.82    4.27
   4   4  -7   55.40    8.19
   4   4  -7   46.66    4.18
  -4  -4   7   53.13    4.07
   4   4  -7   44.14    4.21
   4   4  -7   44.26    4.12
   4   4  -7   43.94    4.09
   4   4  -7   49.53    4.08
   4   4  -7   46.31    6.17
   4   4  -7   32.28    6.47
   4  -4  -7   40.79    7.20
   4  -4  -6   11.29    2.23
   4  -4  -6    9.33    3.34
   4   4  -6    9.72    3.55
   4   4  -6   10.28    3.71
  -4  -4   6   12.47    4.01
  -4  -4   6   16.43    2.48
   4   4  -6   10.99    1.97
   4  -4  -6   11.67    1.92
   4   4  -6   12.29    2.07
   4   4  -6   11.10    1.94
   4   4  -6   11.59    1.80
   4  -4  -6   13.14    2.00
   4   4  -6    7.95    3.34
  -4  -4   6   17.13    2.38
   4  -4  -5  968.80   44.76
   4   4  -5  999.31   45.03
   4   4  -5 1187.23   48.98
  -4  -4   5 1078.63   47.87
  -4  -4   5 1120.20   39.99
  -4  -4   5 1062.46   43.31
  -4   4   5 1066.04   43.34
   4  -4  -5 1042.04   38.40
   4   4  -5 1058.76   39.21
   4   4  -5 1030.66   38.80
   4   4  -5 1025.24   38.53
   4   4  -5 1170.24   47.89
  -4  -4   5 1167.29   39.73
  -4  -4   4   22.59    4.69
  -4  -4   4   24.52    2.88
  -4  -4   4   25.29    3.86
  -4   4   4   27.89    4.01
   4   4  -4   29.40    2.76
   4  -4  -4   23.99    2.79
   4   4  -4   29.26    3.04
   4   4  -4   29.94    2.81
   4   4  -4   27.07    2.87
   4   4  -4   28.05    4.96
  -4  -4   4   26.29    2.86
  -4  -4   3   31.57    5.20
  -4  -4   3   28.08    3.05
  -4   4   3   37.39    4.24
   4   4  -3   24.18    2.59
  -4  -4   3   23.97    3.48
   4   4  -3   27.74    2.74
   4   4  -3   30.82    3.05
   4   4  -3   31.15    2.62
   4   4  -3   23.70    2.71
   4   4  -3   34.02    5.09
  -4  -4   3   31.04    2.96
  -4  -4   2   57.11    4.13
  -4  -4   2   59.35    6.97
  -4  -4   2   57.01    4.31
   4   4  -2   48.72    3.94
   4   4  -2   46.84    3.83
   4   4  -2   54.68    3.90
  -4  -4   2   54.25    3.95
  -4  -4   2   51.93    4.09
  -4  -4   1  913.19   34.63
   4   4  -1  943.89   34.07
   4   4  -1  864.35   34.26
   4   4  -1 1008.37   43.00
  -4  -4   1  953.45   34.48
  -4  -4   1  974.76   34.88
   4   4   0   15.01    2.10
  -4  -4   0   16.54    2.33
  -4  -4   0   14.38    2.07
   4   4   0   12.42    2.00
   4   4   0   18.52    4.32
  -4  -4  -1   47.46    4.07
   4  -4   1   47.36    3.53
   4   4   1   41.68    3.78
   4   4   1   36.70    4.34
   4  -4   1   55.75    5.43
  -4  -4  -1   36.48    5.03
  -4   4  -1   35.74    4.79
  -4   4  -2  244.58   15.98
  -4  -4  -2  291.58   17.45
   4   4   2  331.91   14.36
   4  -4   2  315.04   13.55
  -4  -4  -2  294.15   14.38
   4  -4   2  295.56   13.33
   4  -4   2  319.37   16.75
   4   4   2  301.10   16.09
   4   4   2  350.93   20.40
  -4   4  -2  361.05   17.62
  -4  -4  -2  350.97   22.01
  -4  -4  -3  842.94   39.61
  -4   4  -3  783.38   38.01
   4  -4   3  926.80   33.73
  -4  -4  -3  807.59   34.82
  -4  -4  -3  988.34   35.39
   4   4   3  786.06   37.06
   4  -4   3  908.46   38.76
  -4   4  -3 1030.00   39.45
   4   4   3  973.93   42.22
  -4  -4  -3  992.50   45.01
  -4  -4  -4   74.20    6.45
   4  -4   4   63.96    5.09
  -4  -4  -4   96.21    6.64
  -4   4  -4   81.30    8.25
   4   4   4   63.42    7.52
   4  -4   4   58.62    7.57
   4   4   4   94.05    9.77
   4  -4   4   66.55    6.30
  -4  -4  -4   89.71   10.77
  -4  -4  -5   30.04    6.57
   4  -4   5   21.83    3.39
   4  -4   5   29.34    3.43
  -4  -4  -5   25.83    3.57
   4  -4   5   21.23    2.90
   4   4   5   38.20    6.38
   4  -4   5   20.75    4.79
  -4   4  -5   22.47    4.60
   4   4   5   33.37    5.77
  -4  -4  -6   62.67    9.59
   4  -4   6   64.20    6.00
   4  -4   6   56.24    5.03
   4   4   6   60.23    5.07
   4  -4   6   66.87    5.61
  -4  -4  -6   65.34    5.78
   4   4   6   67.35    8.64
  -4   4  -6   60.73    7.53
   4   4   6   60.37    8.22
   4  -4   6   59.83    8.38
  -4  -4  -7  210.28   11.99
   4  -4   7  229.73   11.82
   4   4   7  215.44   11.59
   4  -4   7  237.37   12.62
  -4  -4  -7  227.42   12.71
   4  -4   7  230.52   12.89
   4   4   7  216.08   16.55
  -4   4  -7  210.11   15.09
   4   4   7  209.61   16.89
   4  -4   7  229.11   17.48
  -4  -4  -8  160.26    9.98
  -4   4  -8  140.84   16.74
  -4  -4  -8  151.90   10.73
   4   4   8  182.87   10.05
   4  -4   8  135.27    9.00
   4  -4   8  144.64    9.71
  -4  -4  -8  165.01   10.47
   4  -4   8  153.94   10.18
   4   4   8  172.39   14.12
  -4   4  -8  159.37   12.60
   4   4   8  163.69   15.08
   4  -4   8  142.30   14.13
  -4  -4  -9  739.59   30.43
  -4   4  -9  623.54   41.58
  -4  -4  -9  684.85   31.45
  -4   4  -9  646.89   30.40
   4  -4   9  745.62   29.89
   4   4   9  756.54   30.04
   4  -4   9  748.58   30.75
  -4  -4  -9  790.01   31.32
  -4  -4  -9  680.63   31.28
   4   4   9  762.23   39.15
   4  -4   9  690.40   37.82
   4  -4   9  796.74   31.21
   4  -4  10  283.13   14.56
  -4   4 -10  232.96   22.82
  -4  -4 -10  265.98   14.22
  -4   4 -10  241.43   14.36
  -4  -4 -10  264.44   15.29
   4  -4  10  280.23   14.04
   4   4  10  273.07   13.94
  -4  -4 -10  288.98   14.83
   4   4  10  263.02   13.24
  -4  -4 -10  267.16   14.66
   4  -4  10  254.76   20.11
   4  -4  11   67.47    5.69
  -4  -4 -11   59.58    5.45
  -4   4 -11   53.92    5.67
  -4  -4 -11   52.69    5.88
   4  -4  11   50.88    5.00
   4   4  11   57.39    5.21
   4   4  11   51.73    5.07
  -4  -4 -11   66.73    5.78
   4   4  11   46.49    4.35
  -4  -4 -11   55.54    5.17
   4   4  12   10.13    2.11
   4   4  12   12.11    2.35
  -4  -4 -12    9.73    2.47
  -4   4 -12   10.49    2.45
  -4  -4 -12    7.97    1.96
  -4  -4 -12   11.14    2.26
   4  -4  12   10.50    2.35
   4   4  13  415.98   18.07
  -4   4 -13  425.73   18.59
   4  -4  13  427.22   18.40
  -4  -4 -14    7.25    1.61
   4   4  14    5.26    1.21
   4  -4  14    5.84    1.41
  -4  -5  16   63.13    4.42
   4  -5 -16   68.84    4.67
   4   5 -15   12.56    1.71
   4  -5 -15   15.44    2.45
   4  -5 -15   17.20    2.84
   4   5 -15   12.77    1.73
   4   5 -14   84.38    5.25
   4  -5 -14   95.17    7.73
   4  -5 -14  101.17    7.34
   4   5 -14   71.78    4.72
   4   5 -14   79.63    5.20
   4  -5 -13  288.26   15.93
   4  -5 -13  315.28   16.09
   4   5 -13  241.61   11.73
   4   5 -13  243.81   12.01
  -4  -5  12  123.44    9.06
   4   5 -12  142.08    8.25
   4   5 -12  142.04    8.41
   4  -5 -12  140.99    9.19
   4  -5 -12  163.57   11.59
   4   5 -12  162.23   13.98
   4   5 -11  215.00   11.13
   4   5 -11  213.33   11.26
  -4  -5  11  245.43   11.75
   4  -5 -11  189.83   11.69
   4  -5 -11  277.32   17.57
   4   5 -11  212.99   11.06
   4  -5 -11  182.02   13.35
  -4  -5  11  159.73   18.77
   4   5 -11  183.35   19.58
   4   5 -11  220.49   17.41
   4   5 -10   34.54    3.98
   4   5 -10   39.10    4.08
   4  -5 -10   44.82    7.35
   4  -5 -10   29.45    4.04
  -4  -5  10   45.45    4.22
   4   5 -10   35.49    3.86
   4   5 -10   33.69    3.75
   4  -5 -10   35.25    5.29
   4   5 -10   34.37    8.46
  -4  -5  10   27.64    7.22
   4   5 -10   38.51    7.21
  -4  -5  10   41.26    4.36
  -4  -5   9  110.54    7.87
   4   5  -9  105.98    7.34
   4   5  -9  104.84    7.11
  -4  -5   9  108.73    6.91
   4  -5  -9   91.59   10.88
   4  -5  -9   95.02    7.38
   4   5  -9  103.49    6.99
   4   5  -9  105.44    7.15
   4   5  -9   98.20    6.93
  -4  -5   9  115.84    7.52
   4   5  -9   97.62   12.00
  -4  -5   9   90.00   12.73
   4   5  -9   90.93   13.30
   4   5  -8   22.90    6.24
  -4  -5   8   14.67    4.85
  -4  -5   8   24.41    3.45
   4   5  -8   25.04    3.19
   4  -5  -8   18.70    4.81
  -4  -5   8   21.27    2.84
   4  -5  -8   27.15    3.53
   4   5  -8   25.87    3.41
   4   5  -8   25.42    3.26
   4   5  -8   35.84    3.74
   4   5  -8   19.31    4.04
  -4  -5   8   19.92    2.99
   4   5  -8   26.01    6.29
  -4  -5   7  294.16   23.18
   4   5  -7  350.09   25.11
  -4  -5   7  376.06   17.25
   4   5  -7  379.89   16.60
   4  -5  -7  356.31   16.46
   4  -5  -7  295.07   19.25
  -4  -5   7  368.29   16.05
   4   5  -7  367.53   16.46
   4   5  -7  373.98   16.77
   4   5  -7  375.33   16.64
   4   5  -7  349.12   15.80
   4   5  -7  355.57   20.40
  -4  -5   7  373.35   16.55
   4   5  -7  394.22   25.27
   4  -5  -6    4.17    1.67
   4  -5  -6    3.00    1.17
   4   5  -6    4.38    2.61
   4  -5  -6    2.96    1.76
  -4  -5   6    3.60    2.50
  -4  -5   6    1.54    1.14
   4   5  -6    1.60    0.98
   4  -5  -6    2.13    1.39
  -4  -5   6    1.17    0.91
   4   5  -6    2.88    1.28
   4   5  -6    1.62    1.01
   4   5  -6    4.55    1.27
   4   5  -6    1.72    1.95
   4  -5  -5    8.90    2.31
  -4  -5   5   11.54    3.83
  -4  -5   5    8.36    1.80
   4   5  -5    6.20    2.89
   4   5  -5    6.07    1.39
   4  -5  -5    5.82    1.76
   4   5  -5    6.70    1.72
   4   5  -5    5.85    1.40
   4   5  -5    5.07    1.37
   4  -5  -5    9.45    2.10
   4  -5  -5    6.73    1.44
   4  -5  -4    4.54    1.44
   4  -5  -4    2.54    0.86
   4  -5  -4    1.95    1.35
  -4  -5   4    0.51    1.23
  -4  -5   4    3.04    1.25
   4   5  -4    7.47    1.46
   4  -5  -4    2.07    1.01
   4   5  -4    3.36    1.07
   4   5  -4    0.95    0.89
   4   5  -4    1.31    0.84
  -4  -5   4    4.71    1.37
   4   5  -4    1.87    1.72
   4  -5  -3  436.99   19.93
  -4  -5   3  518.78   27.36
   4  -5  -3  535.25   21.59
  -4  -5   3  492.71   20.41
   4   5  -3  470.66   19.33
   4  -5  -3  438.46   18.76
   4   5  -3  479.01   19.47
   4   5  -3  444.25   19.53
  -4  -5   3  494.36   18.88
   4   5  -3  505.54   26.30
  -4  -5   3  489.62   19.99
  -4  -5   2  196.76   10.04
  -4  -5   2  180.05    9.88
   4   5  -2  175.06    9.53
   4   5  -2  192.00    9.68
   4   5  -2  177.48    9.13
  -4  -5   2  207.00   10.39
  -4  -5   2  190.45    9.49
  -4  -5   1    8.16    3.72
  -4  -5   1   10.82    1.98
  -4  -5   1   10.79    2.11
   4  -5  -1    8.42    1.42
   4   5  -1   10.90    1.79
  -4  -5   1   10.56    1.98
   4   5  -1   10.80    1.97
   4   5  -1   11.98    4.09
  -4  -5   1   11.81    2.17
  -4  -5   0    4.61    1.40
  -4  -5   0    3.20    2.82
   4  -5   0    3.18    1.02
  -4  -5   0    2.34    1.04
   4   5   0    6.91    1.53
   4   5   0    4.18    1.51
   4   5   0    3.89    2.68
  -4  -5   0    1.21    1.19
   4   5   1  898.44   33.77
  -4  -5  -1  934.38   46.01
  -4  -5  -1  810.03   35.12
   4  -5   1  834.55   32.62
  -4  -5  -1  920.25   34.55
   4   5   2  136.70    8.14
   4  -5   2  148.03    9.51
   4  -5   2  128.17    9.45
   4  -5   2  128.49    9.13
  -4  -5  -2  102.24    8.53
  -4   5  -2  138.27   11.06
  -4  -5  -2  128.31    8.46
   4  -5   2  117.89    6.94
   4  -5   2  116.55    7.17
   4   5   3   45.12    4.40
   4  -5   3   32.62    3.57
   4  -5   3   25.46    3.12
  -4  -5  -3   27.26    3.93
   4  -5   3   36.41    4.63
   4  -5   3   25.71    4.16
   4  -5   3   25.06    3.97
   4   5   3   38.00    7.13
  -4   5  -3   32.88    5.54
  -4  -5  -4   20.77    3.75
   4  -5   4   32.50    3.58
   4   5   4   26.72    6.18
  -4   5  -4   33.08    6.04
   4  -5   4   37.05    4.72
   4  -5   5  631.11   24.90
  -4  -5  -5  656.37   26.88
   4   5   5  637.67   33.87
  -4   5  -5  681.40   32.84
  -4  -5  -5  729.07   38.39
   4  -5   5  666.70   27.33
   4  -5   6  289.34   14.12
  -4  -5  -6  250.71   16.47
  -4  -5  -6  297.69   15.41
   4   5   6  298.37   21.07
  -4   5  -6  260.57   18.74
  -4  -5  -6  273.44   13.91
  -4  -5  -6  324.99   24.09
   4  -5   6  304.04   15.75
   4  -5   7  281.76   14.35
  -4  -5  -7  281.68   17.48
  -4  -5  -7  301.48   15.55
  -4  -5  -7  250.20   16.18
   4   5   7  324.70   21.50
  -4   5  -7  252.43   18.11
  -4  -5  -7  287.25   14.34
   4  -5   7  300.06   15.61
   4  -5   8  170.87   10.66
  -4  -5  -8  188.68   13.54
  -4  -5  -8  183.63   11.53
  -4  -5  -8  176.39   12.48
   4   5   8  196.91   16.11
   4  -5   8  203.85   12.01
  -4  -5  -8  187.25   10.86
  -4  -5  -9   11.88    3.35
   4  -5   9    6.43    2.31
  -4  -5  -9   11.23    2.44
  -4   5  -9    7.58    3.90
   4   5   9   11.25    2.65
  -4  -5  -9    9.97    2.58
   4  -5   9    9.93    2.48
   4   5   9   10.52    2.38
  -4  -5  -9    7.40    2.49
  -4  -5 -10   16.79    2.88
  -4  -5 -10   20.42    3.51
  -4  -5 -10   17.40    3.17
   4  -5  10   20.87    3.24
   4   5  10   15.89    2.70
  -4  -5 -10   18.68    3.84
   4  -5  10   23.94    3.66
  -4  -5 -11  239.74   12.35
  -4  -5 -11  271.46   13.35
   4  -5  11  233.88   12.39
  -4  -5 -11  267.49   14.39
  -4  -5 -11  239.62   12.43
   4   5  11  238.04   11.82
   4  -5  11  258.31   12.99
   4   5  12  143.84    7.61
   4   5  12  154.38    8.54
   4  -5  12  146.56    8.37
  -4  -5 -12  173.30    9.90
   4   5  13   12.25    1.84
  -4  -5 -13   17.49    2.51
   4  -5  13   12.33    1.92
  -4  -6  15  106.27    6.31
   4  -6 -15  113.82    6.78
   4   6 -14  108.14    5.94
   4  -6 -14  125.75    7.53
   4   6 -14  106.05    5.88
   4  -6 -14  130.30    8.53
   4   6 -13   35.97    3.24
   4  -6 -13   39.31    4.68
   4   6 -13   34.12    3.10
  -4  -6  13   48.42    6.28
   4  -6 -13   38.49    4.84
   4   6 -12   20.66    2.61
   4   6 -12   19.59    2.40
   4  -6 -12   27.65    4.47
   4   6 -11  464.20   19.60
   4  -6 -11  535.34   26.03
   4   6 -11  456.09   19.38
   4   6 -11  468.26   19.92
  -4  -6  11  473.27   21.65
  -4  -6  10   38.64    4.60
   4   6 -10   31.77    3.73
   4   6 -10   30.03    3.44
   4  -6 -10   26.24    3.39
   4  -6 -10   36.20    6.27
  -4  -6  10   34.09    3.71
   4   6 -10   34.64    3.65
   4   6 -10   33.37    3.56
  -4  -6  10   27.49    7.66
  -4  -6  10   33.89    3.97
   4   6 -10   31.09    6.47
  -4  -6   9   38.66    4.66
   4   6  -9   36.76    4.15
   4   6  -9   35.79    3.89
  -4  -6   9   48.29    4.36
   4  -6  -9   30.74    3.75
   4  -6  -9   41.19    6.75
   4   6  -9   38.34    3.96
   4   6  -9   37.22    3.99
   4   6  -9   43.86    4.30
   4  -6  -9   33.29    5.09
  -4  -6   9   20.18    6.35
  -4  -6   9   34.97    3.96
   4   6  -9   35.16    7.28
  -4  -6   8   86.48    7.15
   4   6  -8   83.10    6.16
  -4  -6   8   86.27    6.14
   4  -6  -8   56.86    7.63
   4  -6  -8   68.33    5.76
   4   6  -8   83.64    6.16
   4   6  -8   78.96    6.19
   4   6  -8   85.95    6.37
   4  -6  -8   74.46    7.73
  -4  -6   8   58.95   10.32
  -4  -6   8   89.58    6.49
   4   6  -8   85.64   11.25
  -4  -6   7   48.64    5.26
   4   6  -7   44.46    4.40
   4  -6  -7   43.37    4.25
  -4  -6   7   49.35    4.46
   4  -6  -7   34.97    5.28
   4   6  -7   38.96    4.13
   4   6  -7   40.00    4.32
   4   6  -7   39.79    3.91
   4   6  -7   43.89    4.51
  -4  -6   7   45.35    4.51
   4   6  -7   36.19    7.54
   4  -6  -7   52.59    6.27
  -4  -6   7   32.55    7.40
  -4  -6   6   84.75    8.35
   4  -6  -6  105.51    8.09
   4  -6  -6  120.88    9.48
  -4  -6   6   81.08   11.32
  -4  -6   6  112.24    8.11
   4   6  -6  123.33    7.60
  -4  -6   6  109.76    7.19
   4  -6  -6  103.60    6.73
   4  -6  -6   90.19    7.86
   4   6  -6  115.98    7.21
   4   6  -6  110.02    7.31
   4   6  -6  106.92    6.58
   4   6  -6  114.71   13.06
  -4  -6   5  111.12    8.47
   4  -6  -5  113.25    8.10
   4  -6  -5  135.68    9.62
  -4  -6   5   80.53   11.01
  -4  -6   5  109.69    7.91
   4  -6  -5  100.94    6.39
   4  -6  -5   98.86    7.39
   4   6  -5  112.63    7.23
   4   6  -5  105.81    6.56
   4   6  -5  107.32    6.80
   4   6  -5  112.44   12.45
  -4  -6   5  103.26    7.35
   4  -6  -4   33.76    3.80
   4  -6  -4   32.70    4.07
   4  -6  -4   26.30    2.87
  -4  -6   4   31.46    3.96
   4   6  -4   35.60    3.45
   4   6  -4   31.45    6.60
   4   6  -4   32.73    3.40
   4   6  -4   39.45    4.02
   4   6  -4   34.38    3.53
   4   6  -4   35.79    3.70
   4  -6  -4   31.70    4.45
   4  -6  -3    5.78    1.98
   4   6  -3    4.40    1.41
  -4  -6   3    4.91    1.37
   4   6  -3    3.22    2.37
   4   6  -3    4.33    1.37
   4   6  -3    3.77    1.52
   4   6  -3    2.73    1.31
   4  -6  -3    3.92    1.60
   4  -6  -3    7.94    1.85
   4  -6  -3    4.44    1.15
  -4  -6   3    2.36    1.19
  -4  -6   3    1.73    2.41
   4  -6  -2   71.61    6.41
  -4  -6   2   71.11    5.27
   4   6  -2   59.45    5.11
   4   6  -2   78.05    5.67
   4   6  -2   55.92    4.58
  -4  -6   2   47.73    9.67
   4  -6  -2   71.51    5.39
  -4  -6   2   67.51    5.51
   4  -6  -1  592.89   24.33
  -4  -6   1  548.77   22.59
   4   6  -1  609.18   33.29
   4  -6  -1  418.51   19.85
   4   6  -1  504.87   21.53
  -4  -6   1  610.02   23.39
  -4  -6   1  590.93   22.72
  -4  -6   1  546.75   34.88
   4  -6  -1  501.71   21.55
  -4  -6   0  180.69    9.99
  -4  -6   0  159.46    9.73
   4  -6   0  130.08   10.57
  -4  -6   0  159.95   17.29
   4  -6   0  158.93   10.40
   4   6   0  160.29    8.72
   4  -6   0  141.67    8.08
   4   6   0  160.59    9.31
  -4  -6   0  158.70   10.15
   4   6   0  180.80   16.57
  -4  -6  -1  199.56   10.99
   4  -6   1  128.28   10.55
  -4  -6  -1  192.65   18.97
   4  -6   1  182.83   11.29
  -4  -6  -1  171.60   10.46
   4  -6   1  149.25    8.77
   4   6   1  168.70    9.56
   4   6   1  178.89   10.15
  -4  -6  -1  159.36   11.04
   4   6   1  204.88   17.68
   4   6   2   45.60    4.57
   4  -6   2   48.71    5.86
  -4  -6  -2   44.32    9.30
   4  -6   2   55.93    5.96
  -4  -6  -2   39.83    5.44
   4   6   2   52.15    8.78
  -4   6  -2   51.50    7.25
   4  -6   2   44.81    4.34
  -4  -6  -2   46.48    5.22
   4   6   3  293.53   13.98
  -4  -6  -3  277.77   23.38
   4  -6   3  286.62   16.08
  -4  -6  -3  193.06   14.60
  -4   6  -3  312.75   19.72
  -4  -6  -3  253.40   14.85
  -4  -6  -3  234.47   14.85
   4   6   4   45.57    4.91
   4  -6   4   41.67    4.12
  -4  -6  -4   41.40    5.91
  -4  -6  -4   39.29    5.36
  -4  -6  -4   53.87    9.90
   4  -6   4   55.04    6.24
  -4  -6  -4   36.64    5.58
   4   6   4   45.86    8.38
  -4   6  -4   66.16    8.89
  -4  -6  -5  181.45   10.17
   4   6   5  214.10   11.35
  -4  -6  -5  149.15   12.02
   4  -6   5  171.73    9.61
   4  -6   5  197.12   12.42
  -4  -6  -5  159.14   12.50
   4   6   5  219.31   18.32
  -4   6  -5  186.83   15.80
  -4  -6  -6  231.54   11.76
   4   6   6  224.03   12.29
  -4  -6  -6  198.42   14.58
   4  -6   6  205.38   11.12
   4  -6   6  235.53   13.63
   4   6   6  234.48   19.15
  -4  -6  -7  390.04   17.67
   4   6   7  420.34   18.85
  -4  -6  -7  392.79   22.19
   4  -6   7  382.11   17.51
   4  -6   7  385.91   17.25
   4  -6   7  438.09   20.12
  -4  -6  -7  367.28   20.74
   4   6   7  443.24   26.79
  -4  -6  -8  287.43   14.10
   4  -6   8  292.28   14.04
  -4  -6  -8  290.40   17.95
   4  -6   8  278.90   14.16
   4   6   8  289.74   15.00
  -4  -6  -8  290.45   16.85
   4   6   8  263.42   19.98
   4  -6   8  327.86   16.34
   4  -6   9   60.44    6.03
   4  -6   9   52.35    4.92
   4  -6   9   51.28    4.92
  -4  -6  -9   60.35    6.87
   4   6   9   64.60    5.80
   4   6   9   56.31    5.11
  -4  -6  -9   58.72    6.12
   4  -6  10  150.37    9.32
  -4  -6 -10  148.11   10.20
   4  -6  10  125.89    8.08
   4   6  10  136.62    8.64
   4   6  10  129.55    7.91
  -4  -6 -10  135.33    8.83
   4  -6  11   69.72    5.36
  -4  -6 -11   63.49    5.64
   4  -6  11   57.84    4.66
   4   6  11   61.56    5.00
   4   6  11   59.30    4.46
  -4  -6 -11   59.68    4.64
   4   6  12  286.44   12.63
   4   6  12  293.45   13.54
  -4  -6 -12  359.61   14.78
  -4  -6 -12  358.24   14.79
  -4  -7  14    1.65    0.98
   4   7 -13   40.59    3.03
   4   7 -13   42.72    3.08
   4   7 -12   75.30    4.83
   4   7 -12   75.39    4.82
   4  -7 -12   81.06    7.04
   4   7 -11    3.66    1.28
   4  -7 -11    3.60    1.89
   4   7 -11    3.13    1.00
  -4  -7  11    4.29    3.17
   4  -7 -11    2.58    1.74
   4   7 -10  173.76    8.79
   4   7 -10  171.94    9.34
  -4  -7  10  189.95    9.79
   4  -7 -10  170.96   12.21
   4   7 -10  175.66    9.08
   4   7 -10  158.27    8.76
  -4  -7  10  176.71   16.01
   4  -7 -10  155.18   11.47
   4  -7  -9  161.93   11.87
  -4  -7   9  203.69   11.90
   4   7  -9  172.06    9.79
   4   7  -9  174.75    9.28
  -4  -7   9  201.60   10.11
   4  -7  -9  137.28   11.58
   4   7  -9  168.41    9.38
   4   7  -9  169.61    9.28
   4   7  -9  167.67    9.39
  -4  -7   9  118.99   13.08
  -4  -7   9  183.47   10.26
   4   7  -9  186.54   16.37
   4  -7  -8   54.88    6.58
  -4  -7   8   63.60    6.31
   4   7  -8   59.48    5.28
   4   7  -8   64.86    5.11
   4  -7  -8   44.26    6.05
  -4  -7   8   63.25    5.23
   4   7  -8   61.93    5.09
   4   7  -8   51.86    4.85
   4   7  -8   67.80    5.39
   4   7  -8   58.00    9.37
   4  -7  -7    7.47    2.55
  -4  -7   7   13.34    2.90
   4   7  -7   13.61    2.42
  -4  -7   7   15.01    2.57
   4   7  -7   12.28    2.18
   4   7  -7   11.43    2.36
   4   7  -7   10.88    2.30
   4   7  -7   15.61    2.78
   4   7  -7   13.23    4.76
  -4  -7   7    7.20    2.63
  -4  -7   6  184.71   12.89
   4  -7  -6  198.88   14.04
  -4  -7   6  235.83   13.40
   4   7  -6  254.35   12.39
  -4  -7   6  232.14   12.15
   4   7  -6  234.62   12.17
   4   7  -6  244.59   11.88
   4   7  -6  243.61   11.18
  -4  -7   6  240.20   12.58
   4   7  -6  246.24   20.52
  -4  -7   5   46.15    4.86
  -4  -7   5   43.95    5.14
   4  -7  -5   57.80    5.77
   4  -7  -5   48.24    6.12
  -4  -7   5   39.82    4.85
   4   7  -5   53.76    4.88
  -4  -7   5   44.36    4.60
   4   7  -5   49.91    4.72
   4   7  -5   47.36    4.28
   4   7  -5   46.49    4.10
  -4  -7   5   46.23    4.76
   4   7  -5   47.40    8.71
   4  -7  -4  272.35   14.68
  -4  -7   4  259.66   13.90
   4   7  -4  283.61   12.67
  -4  -7   4  272.47   14.14
   4   7  -4  304.64   22.50
   4   7  -4  284.50   12.99
   4   7  -4  299.74   14.13
   4   7  -4  273.89   13.36
   4   7  -4  267.97   12.99
   4  -7  -4  262.22   15.67
   4  -7  -3   38.81    5.21
   4   7  -3   35.08    3.75
  -4  -7   3   42.13    3.87
   4   7  -3   43.50    8.21
  -4  -7   3   40.87    4.55
   4   7  -3   40.96    4.10
   4   7  -3   42.83    4.35
   4   7  -3   40.38    4.37
   4  -7  -3   34.63    4.48
   4  -7  -3   48.88    4.83
  -4  -7   3   40.95    4.56
  -4  -7   3   22.77    7.71
   4  -7  -2   35.74    4.90
   4   7  -2   41.28    4.25
  -4  -7   2   38.94    4.05
   4   7  -2   41.09    7.86
  -4  -7   2   45.09    4.80
   4   7  -2   50.66    4.61
   4   7  -2   43.88    4.60
   4  -7  -2   36.31    4.58
   4  -7  -2   37.53    4.29
  -4  -7   2   43.40    4.70
  -4  -7   2   27.33    8.17
   4  -7  -1  242.98   13.95
  -4  -7   1  223.22   12.33
  -4  -7   1  223.59   12.72
   4   7  -1  235.50   12.43
   4   7  -1  234.70   12.38
  -4   7   1  180.84   15.90
   4   7  -1  214.21   11.33
  -4  -7   1  259.60   13.14
   4  -7  -1  212.45   12.01
  -4  -7   1  192.97   21.97
   4  -7   0  303.33   15.87
   4  -7   0  233.18   12.27
   4   7   0  312.02   23.63
  -4  -7   0  240.85   14.33
  -4  -7   0  269.09   14.57
   4   7   0  252.30   13.23
  -4  -7   0  301.55   14.86
  -4  -7   0  306.42   15.43
  -4  -7   0  262.55   25.15
   4  -7   0  262.00   13.76
   4  -7   1  167.69    9.87
  -4  -7  -1  175.28   11.73
  -4  -7  -1  164.99   11.98
   4   7   1  212.60   19.23
  -4   7  -1  201.51   15.52
   4   7   1  181.95   10.68
   4  -7   1  213.90   12.76
  -4  -7  -1  218.03   12.41
  -4  -7  -1  158.07   19.17
  -4  -7  -1  190.95   11.92
  -4  -7  -2   62.43    6.61
  -4  -7  -2   66.27   12.10
   4  -7   2   83.10    7.52
  -4  -7  -2   74.98    7.36
   4   7   2   63.81    5.49
   4   7   2   72.83    6.10
  -4  -7  -2   59.27    7.22
   4   7   2   85.93   12.05
  -4   7  -2   67.72    8.96
  -4  -7  -3    7.52    2.58
  -4  -7  -3    3.73    3.44
  -4  -7  -3    5.01    2.34
   4   7   3    5.56    1.82
   4   7   3    5.93    2.04
  -4  -7  -3    6.77    2.78
  -4   7  -3    6.94    3.07
  -4  -7  -4   12.55    3.34
  -4  -7  -4   22.66    6.82
  -4  -7  -4   18.89    4.47
   4   7   4   17.23    2.99
   4   7   4   18.07    3.18
  -4  -7  -4   15.62    4.02
  -4   7  -4   19.23    4.99
  -4  -7  -5  111.24   11.45
  -4  -7  -5   87.68    9.34
   4   7   5  109.71    7.78
   4   7   5  125.95    8.43
  -4  -7  -5   87.30    9.35
   4   7   5  111.36   13.68
  -4  -7  -6   93.21   11.00
  -4  -7  -6   78.07    8.88
   4  -7   6   74.60    5.71
   4   7   6   93.75    7.11
   4   7   6   99.23    7.30
   4   7   6  100.02   12.71
  -4  -7  -7   11.10    3.74
  -4  -7  -7   13.82    4.89
   4  -7   7    9.68    1.97
   4   7   7   20.62    3.28
   4   7   7   15.26    2.93
   4   7   7   23.16    5.99
  -4  -7  -8   18.70    3.96
  -4  -7  -8   18.32    4.64
   4  -7   8   18.67    2.62
   4   7   8   15.26    2.79
   4   7   8   10.52    2.42
  -4  -7  -8   15.25    3.44
  -4  -7  -9   10.58    2.98
   4   7   9   10.68    2.24
  -4  -7  -9   10.19    2.36
  -4  -7  -9   10.94    2.72
   4   7  10  180.95    9.78
  -4  -7 -10  206.87   11.45
  -4  -7 -10  198.29   10.97
   4   7  10  175.37    9.27
  -4  -7 -10  195.19    9.99
   4   7  11   55.78    3.58
  -4  -7 -11   52.38    4.31
  -4  -7 -11   47.21    4.19
   4   7  11   54.32    3.77
   4   7  11   60.30    4.28
   4   8 -12   42.44    2.89
   4  -8 -12   46.86    4.50
  -4  -8  11    2.67    0.93
  -4  -8  11    4.37    2.25
   4   8 -11    2.68    0.95
   4   8 -11    3.48    1.05
   4  -8 -11    5.54    1.98
   4   8 -10  137.24    7.08
   4   8 -10  127.57    6.56
   4  -8 -10  110.38    8.93
  -4  -8  10  103.53    6.67
   4   8  -9   21.55    2.77
   4   8  -9   19.82    2.27
  -4  -8   9   25.91    3.06
   4   8  -9   20.13    2.52
   4   8  -9   20.38    2.52
   4  -8  -9   17.29    3.69
  -4  -8   9   18.03    2.71
  -4  -8   9   24.00    4.62
  -4  -8   8   72.55    5.74
   4   8  -8   72.14    5.58
   4   8  -8   62.78    4.76
  -4  -8   8   76.32    5.62
   4   8  -8   73.51    5.20
   4   8  -8   74.02    5.34
   4   8  -8   70.91    5.34
   4  -8  -8   48.57    6.35
  -4  -8   8   64.04    5.44
  -4  -8   8   53.10    6.59
  -4  -8   7   11.00    2.38
   4   8  -7   13.07    2.24
  -4  -8   7   12.98    2.45
   4   8  -7   15.74    2.62
   4   8  -7   11.52    2.26
   4   8  -7   12.14    2.44
   4  -8  -7    8.24    2.80
  -4  -8   7    9.82    2.75
  -4  -8   7    9.92    2.23
  -4  -8   6  226.67   12.19
   4   8  -6  272.90   21.36
   4   8  -6  230.22   11.55
  -4  -8   6  229.40   11.93
   4   8  -6  221.90   11.66
   4   8  -6  228.60   12.11
   4   8  -6  232.36   11.97
   4   8  -6  209.62   10.88
  -4  -8   6  183.22   11.46
   4  -8  -6  179.80   13.62
   4  -8  -5  109.87   10.05
  -4  -8   5  127.80    8.72
   4   8  -5  152.93   15.94
   4   8  -5  132.39    8.27
  -4  -8   5  130.68    8.58
   4   8  -5  133.17    8.51
   4   8  -5  133.97    8.20
   4   8  -5  126.59    7.48
  -4  -8   5  122.68    8.59
   4  -8  -5  129.19    9.46
   4  -8  -4  129.74   10.71
   4   8  -4  158.96    9.20
   4   8  -4  152.22    9.16
  -4  -8   4  142.23    9.41
   4   8  -4  171.31   16.86
   4   8  -4  146.18    8.24
   4   8  -4  141.96    8.47
  -4  -8   4  139.61    9.28
   4  -8  -4  138.02    9.85
   4  -8  -3   33.96    5.12
  -4  -8   3   35.44    4.49
  -4   8   3   21.54    5.23
   4   8  -3   39.67    8.14
  -4  -8   3   38.99    4.68
   4   8  -3   32.72    4.23
   4   8  -3   37.58    3.78
   4   8  -3   35.93    3.98
   4   8  -3   39.17    4.32
   4  -8  -3   36.65    4.78
  -4  -8   3   20.04    7.49
   4  -8  -3   43.69    4.94
  -4  -8   3   32.14    4.26
   4  -8  -2  160.11   11.43
  -4  -8   2  150.45    9.03
   4   8  -2  188.97   17.72
  -4  -8   2  156.54   10.35
   4   8  -2  154.78    9.15
   4   8  -2  153.31    9.05
   4   8  -2  165.99    9.84
   4   8  -2  163.91   10.00
   4  -8  -2  154.23   10.55
   4  -8  -2  157.74   10.05
  -4  -8   2  159.39   10.39
  -4  -8   1   26.56    3.69
   4   8  -1   29.85    6.97
  -4  -8   1   31.06    4.33
   4   8  -1   31.44    3.87
   4   8  -1   29.94    3.73
   4   8  -1   32.42    4.05
   4   8  -1   23.99    3.70
   4  -8  -1   28.82    4.37
  -4  -8   1   43.62    4.93
   4  -8  -1   30.51    4.09
  -4  -8   1   14.81    6.42
   4  -8  -1   35.20    5.01
  -4  -8   0   23.54    3.91
  -4  -8   0   27.38    4.24
  -4   8   0   25.27    5.71
   4   8   0   22.43    3.30
   4   8   0   22.41    3.38
   4   8   0   25.80    3.75
   4   8   0   22.63    2.99
  -4  -8   0   32.02    4.51
   4  -8   0   21.46    3.48
  -4  -8   0   19.57    7.14
  -4  -8  -1   40.63    5.57
  -4   8  -1   43.74    7.49
  -4  -8  -1   45.43    5.70
   4   8   1   36.52    4.37
   4   8   1   35.66    4.02
   4   8   1   40.20    4.53
   4  -8   1   36.91    4.65
  -4  -8  -1   41.42    9.86
  -4  -8  -2   65.03    7.77
  -4  -8  -2   73.58    7.85
   4   8   2   87.36    6.52
  -4  -8  -2   82.88   13.51
   4  -8   2   72.42    6.72
  -4  -8  -3   45.55    6.55
  -4  -8  -3   29.14    5.51
   4   8   3   46.39    8.85
  -4  -8  -3   33.77    5.78
   4   8   3   44.36    4.51
  -4  -8  -3   36.60    9.05
  -4  -8  -3   38.27    5.74
  -4  -8  -4  353.66   19.75
  -4  -8  -4  369.73   21.63
   4   8   4  255.44   13.53
   4   8   4  365.17   15.77
  -4  -8  -4  274.13   18.65
  -4  -8  -4  289.20   19.16
  -4  -8  -5   30.65    5.63
  -4  -8  -5   34.33    6.72
   4   8   5   32.24    3.56
   4   8   5   43.67    4.43
  -4  -8  -5   23.92    5.20
  -4  -8  -5   28.84    5.40
  -4  -8  -6    7.33    3.17
  -4  -8  -6    9.93    4.00
   4   8   6    7.87    1.84
   4   8   6   13.38    2.43
  -4  -8  -6    4.70    2.51
  -4  -8  -6    5.31    2.58
  -4  -8  -7  132.22   11.76
   4   8   7  107.24    6.94
   4   8   7  124.36    7.70
  -4  -8  -7  123.78   10.21
  -4  -8  -8  287.12   14.95
  -4  -8  -8  276.09   15.59
   4   8   8  257.10   12.12
  -4  -8  -8  260.26   13.50
  -4  -8  -9   43.97    4.52
   4   8   9   44.50    3.69
   4   8   9   51.10    3.90
  -4  -8  -9   53.03    4.95
   4   8   9   47.03    3.51
   4   8   9   53.46    4.03
  -4  -8  -9   48.04    4.20
   4   8  10    2.21    0.91
  -4  -8 -10    2.77    1.05
   4  -8  11   49.44    2.93
   4   9  -9    4.87    1.05
  -4  -9   9    5.03    1.23
   4   9  -9    3.74    1.03
   4   9  -8  170.43    8.53
   4   9  -8  173.83    8.50
  -4  -9   8  164.19    9.08
   4   9  -8  186.62    9.03
   4   9  -7    3.90    1.26
   4   9  -7    4.23    1.30
   4   9  -7    4.16    1.42
  -4  -9   7    4.52    1.45
  -4  -9   7    2.80    1.22
   4   9  -7    2.59    1.16
   4   9  -6    2.06    1.06
  -4  -9   6    3.43    1.31
   4   9  -6    1.57    1.09
   4   9  -6    3.02    1.41
   4   9  -6    2.24    1.16
  -4  -9   6    3.65    1.58
  -4  -9   6    2.37    1.32
   4   9  -5    4.55    1.70
   4   9  -5    3.88    1.46
   4   9  -5    3.07    1.15
   4   9  -5    3.02    1.39
   4   9  -5    2.82    1.21
  -4  -9   5    2.71    1.46
  -4  -9   5    1.20    1.15
  -4  -9   4   28.62    3.88
   4   9  -4   22.65    2.92
   4   9  -4   25.33    3.27
   4   9  -4   22.65    2.96
   4   9  -4   21.82    2.58
  -4  -9   4   24.06    3.45
  -4  -9   3   51.59    5.43
   4   9  -3   46.60    4.40
   4   9  -3   52.74    4.77
  -4  -9   3   54.67    5.58
   4   9  -3   48.37    4.30
   4   9  -3   43.10    3.86
  -4  -9   3   45.80    5.05
   4  -9  -3   49.17    5.49
  -4  -9   2   77.58    6.89
  -4  -9   2   78.29    7.12
   4   9  -2   84.64    6.40
   4   9  -2   88.23    6.22
   4   9  -2   79.27    5.74
   4  -9  -2   64.72    6.68
  -4  -9   2  101.48    7.71
  -4  -9   1    8.95    2.35
   4   9  -1    9.27    1.79
  -4  -9   1    9.80    2.80
   4   9  -1   11.88    2.50
   4   9  -1    7.69    1.65
   4   9  -1    7.16    1.92
   4   9  -1    9.29    2.16
   4  -9  -1    7.04    2.40
   4  -9  -1   12.80    2.75
  -4  -9   0    9.14    2.76
  -4  -9   0    9.01    2.47
   4   9   0    5.82    1.55
  -4  -9   0    9.24    2.72
   4   9   0    7.31    1.70
   4   9   0    4.69    1.71
   4   9   0    5.89    1.84
   4  -9   0    5.75    2.17
   4  -9   0    7.54    2.21
  -4  -9  -1    3.68    2.08
  -4  -9  -1    4.25    2.32
   4   9   1    2.09    1.15
  -4  -9  -1    1.58    1.65
   4   9   1    1.10    1.05
   4   9   1    3.89    1.63
   4   9   1    3.95    1.54
   4  -9   1    2.43    1.72
   4  -9   1    3.99    1.70
  -4  -9  -2  367.57   19.55
  -4  -9  -2  364.93   18.85
   4   9   2  315.85   13.74
  -4  -9  -2  266.87   15.84
   4   9   2  258.21   12.94
   4   9   2  344.21   14.38
   4   9   2  265.34   12.33
   4  -9   2  204.70   13.93
   4  -9   2  222.57   13.75
  -4  -9  -3   36.08    6.13
  -4  -9  -3   48.49    6.41
   4   9   3   35.11    3.67
  -4  -9  -3   36.25    4.81
   4   9   3   33.44    3.63
   4   9   3   49.85    4.43
   4   9   3   37.11    3.52
   4  -9   3   23.27    3.67
   4   9   4   16.19    2.46
   4   9   4   14.10    2.37
   4   9   4   17.76    2.43
   4   9   4   20.03    2.85
   4  -9   4   13.16    2.70
  -4  -9  -5   36.16    5.50
   4   9   5   27.07    3.05
   4   9   5   23.20    2.92
   4   9   5   23.66    2.78
   4   9   5   30.49    3.28
   4  -9   5   18.93    3.17
  -4  -9  -6  280.42   14.72
   4   9   6  243.33   10.97
   4   9   6  229.90   10.60
   4  -9   6  178.39   11.18
   4   9   6  223.27   10.68
   4   9   7   28.96    2.83
   4   9   7   27.98    2.74
   4   9   7   25.87    2.64
   4   9   7   30.99    2.83
   4  -9   7   25.22    3.13
   4   9   7   25.52    2.69
   4  -9   8    3.84    1.21
   4   9   8    1.65    0.80
   4  -9   9   13.29    1.45
   4  -9   9    9.99    1.28
   4  10  -6  116.75    5.89
   4  10  -6  116.56    6.03
   4  10  -5   46.48    3.38
   4  10  -5   46.21    3.52
   4  10  -5   56.75    3.94
   4  10  -5   56.01    3.97
   4  10  -4   51.49    3.81
   4  10  -4   57.11    4.21
   4  10  -4   49.64    3.84
   4  10  -3    0.28    0.66
   4  10  -3    0.11    0.68
   4  10  -3    0.39    0.86
   4  10  -3    0.58    0.69
  -4 -10   3    1.90    1.55
   4  10  -3    0.26    0.46
   4  10  -2   95.39    5.79
   4  10  -2  117.45    6.56
   4  10  -2  113.98    6.33
   4  10  -2  107.65    5.78
   4  10  -1   50.57    3.79
   4  10  -1   60.48    4.29
   4  10  -1   54.94    3.91
   4  10  -1   52.21    3.60
   4 -10  -1   62.05    5.91
   4  10   0   40.88    3.41
   4  10   0   54.99    4.07
   4 -10   0   36.61    4.67
   4  10   0   46.58    3.51
   4  10   0   49.08    3.73
   4  10   1    2.99    1.15
   4  10   1    2.58    0.97
   4  10   1    3.67    1.08
   4 -10   1    3.92    1.73
   4  10   2    1.04    0.89
   4  10   2    1.47    0.66
   4  10   2    1.04    0.82
   4  10   2    1.75    0.97
   4 -10   2    1.29    1.27
   4  10   3   34.21    3.01
   4  10   3   34.51    2.99
   4  10   3   30.64    2.78
   4 -10   3   35.48    4.06
   4  10   3   23.60    2.33
   4 -10   4   32.93    3.65
   4  10   4   31.24    2.76
   4  10   4   27.43    2.58
   4 -10   5   10.64    1.98
   4 -10   6    0.62    0.83
  -5   0  17   26.06    3.04
   5   0 -16    0.68    0.96
  -5   0  16    0.98    1.30
   5   0 -16    0.16    0.87
   5   0 -15  279.28   14.14
   5   0 -15  322.88   14.97
  -5   0  15  293.11   15.25
  -5   0  14    0.25    1.37
  -5   0  14   -0.73    2.03
   5   0 -14    1.91    1.48
   5   0 -14    0.86    1.16
   5   0 -14    0.44    1.31
   5   0 -14   -1.08    2.12
  -5   0  13  216.70   12.77
  -5   0  13  194.40   18.48
   5   0 -13  213.36   12.39
   5   0 -13  252.21   12.94
   5   0 -13  189.40   13.95
   5   0 -13  227.67   12.82
   5   0 -13  266.28   13.44
   5   0 -13  285.38   22.11
   5   0 -13  168.03   20.92
   5   0 -12    2.02    2.81
  -5   0  12    1.06    0.96
   5   0 -12    0.87    1.33
  -5   0  12    2.08    2.36
   5   0 -12    0.34    1.71
   5   0 -12    0.44    1.24
   5   0 -12    0.70    1.30
   5   0 -12    2.47    1.63
   5   0 -12    0.74    2.52
   5   0 -11 1155.20   67.43
  -5   0  11 1375.68   53.06
   5   0 -11 1701.79   55.39
   5   0 -11 1489.64   54.73
   5   0 -11 1214.72   56.15
   5   0 -11 1462.60   54.18
   5   0 -11 1718.14   55.52
   5   0 -11 1340.46   53.16
   5   0 -11 1930.00   70.60
   5   0 -10    0.84    2.03
  -5   0  10    0.30    0.73
   5   0 -10    0.95    1.33
  -5   0  10    1.69    1.75
   5   0 -10    3.46    1.75
   5   0 -10    0.19    0.85
   5   0 -10    0.19    1.08
   5   0 -10    0.19    1.23
   5   0 -10    0.67    0.94
   5   0 -10    0.61    2.08
   5   0  -9  378.25   28.25
  -5   0   9  431.95   18.70
   5   0  -9  494.00   20.11
  -5   0   9  429.33   25.94
   5   0  -9  439.40   21.49
   5   0  -9  450.34   19.69
   5   0  -9  484.55   19.80
   5   0  -9  456.04   19.53
   5   0  -9  545.40   28.27
   5   0  -8    4.60    2.89
   5   0  -8    0.62    1.02
  -5   0   8    5.43    2.75
  -5   0   8    0.77    0.80
   5   0  -8    1.59    1.08
   5   0  -8    0.28    0.82
   5   0  -8    1.82    0.99
   5   0  -8    1.32    1.84
   5   0  -7  544.36   30.71
  -5   0   7  551.14   21.20
   5   0  -7  501.61   21.70
  -5   0   7  548.38   27.75
   5   0  -7  563.72   21.84
   5   0  -7  580.17   22.02
   5   0  -7  500.43   21.03
   5   0  -7  505.89   21.69
   5   0  -7  574.34   21.58
   5   0  -7  531.84   21.77
   5   0  -7  561.21   27.06
   5   0  -6    3.46    2.28
   5   0  -6    0.53    0.80
   5   0  -6    0.92    0.84
  -5   0   6    0.52    0.62
   5   0  -6    1.81    0.99
   5   0  -6    0.48    0.78
   5   0  -6    0.79    0.82
   5   0  -6    1.46    1.35
   5   0  -5 1915.60   74.36
   5   0  -5 2076.17   65.86
   5   0  -5 1792.02   65.71
   5   0  -5 1641.56   67.94
   5   0  -5 1729.47   65.61
   5   0  -5 1716.45   71.35
   5   0  -5 2109.07   66.19
  -5   0   4    2.72    1.51
   5   0  -4    0.69    0.76
   5   0  -4    0.34    1.05
   5   0  -4    1.55    1.62
  -5   0   3 2058.47   60.48
   5   0  -3 1771.74   62.60
   5   0  -2    0.94    1.51
   5   0  -2    0.33    1.20
   5   0  -2    0.37    0.30
   5   0  -2    1.79    1.23
   5   0  -1 1174.31   52.18
   5   0  -1 1572.37   53.20
   5   0   0    0.26    1.16
   5   0   0    0.54    1.00
   5   0   1  777.98   33.50
  -5   0  -1  734.01   30.23
   5   0   2    1.47    1.62
  -5   0  -2   -0.23    0.78
   5   0   3 1765.73   64.37
  -5   0  -3 1919.22   68.23
  -5   0  -4    0.45    1.78
   5   0   4   -0.15    0.83
   5   0   4    0.29    0.63
  -5   0  -4    0.59    1.17
   5   0   4    0.93    0.92
   5   0   5  534.39   22.64
   5   0   5  533.64   21.55
   5   0   5  570.52   21.31
  -5   0  -5  554.63   30.01
   5   0   5  548.44   22.20
   5   0   6    7.65    1.94
   5   0   6    2.18    1.00
   5   0   6    4.61    1.19
  -5   0  -6    2.89    2.13
   5   0   6    5.84    1.57
   5   0   7   47.34    4.80
   5   0   7   52.51    4.23
  -5   0  -7   42.30    4.55
  -5   0  -7   41.04    7.91
   5   0   7   43.80    4.37
   5   0   8    1.04    0.83
   5   0   8    0.23    1.14
  -5   0  -8    2.02    1.47
   5   0   8    0.78    1.11
   5   0   9  533.44   24.12
   5   0   9  553.38   22.08
  -5   0  -9  512.32   23.90
   5   0   9  535.10   23.16
   5   0  10    2.52    1.13
   5   0  10    2.55    1.55
  -5   0 -10    1.01    1.44
   5   0  11  174.21   10.81
  -5   0 -11  165.08   10.62
  -5   0 -11  140.46   15.52
  -5   0 -11  149.15   10.98
   5   0  12    0.24    1.36
  -5   0 -12   -0.56    1.57
  -5   0 -12    0.92    1.46
   5   0  13  892.10   35.52
  -5   0 -13  907.55   36.66
   5   0  13  891.44   34.85
   5   0  14    1.63    1.24
  -5   0 -14    1.62    1.35
   5   0  14    1.52    1.13
  -5   0 -15  342.82   15.23
  -5   0 -16    0.07    0.59
  -5   1  17    3.96    1.34
  -5  -1  17    2.46    1.14
   5   1 -17    2.66    0.99
   5   1 -16  115.67    6.86
   5   1 -16  132.60    7.50
  -5   1  16  127.32    8.15
  -5  -1  16  121.43    7.94
   5   1 -15  241.54   12.75
   5  -1 -15  307.00   14.11
   5  -1 -15  261.56   13.33
   5   1 -15  265.33   13.02
   5  -1 -15  277.71   13.81
   5   1 -15  277.66   13.39
  -5   1  15  260.06   14.03
  -5  -1  15  246.64   13.72
   5   1 -14   65.29   12.57
   5  -1 -14   72.60   12.96
  -5   1  14   77.15    6.79
  -5  -1  14   79.00    6.85
  -5   1  14   70.73   10.73
  -5  -1  14   71.87   10.91
   5   1 -14   70.55    6.00
   5  -1 -14   73.94    6.66
   5   1 -14   92.68    6.67
   5   1 -14   90.85    6.65
   5  -1 -14   82.52    6.80
   5  -1 -14   86.08    7.07
   5   1 -14   97.88   12.04
   5  -1 -13  113.16   16.48
   5   1 -13   94.93   15.45
  -5  -1  13  145.03    9.03
  -5   1  13  143.10    9.69
  -5  -1  13  125.17    9.19
   5  -1 -13  150.10    9.87
   5   1 -13  138.32    8.98
   5   1 -13  153.04    9.25
  -5   1  13  140.50   15.30
  -5  -1  13  145.24   15.52
   5  -1 -13  119.77   10.55
   5   1 -13  122.28   10.79
   5   1 -13  155.79    9.44
   5  -1 -13  161.73   10.39
   5   1 -13  164.40    9.52
   5  -1 -13  162.94   10.43
   5   1 -13  153.42   15.47
   5  -1 -12   72.61   13.13
   5   1 -12   82.63   13.88
  -5  -1  12  105.78    7.45
   5   1 -12  118.95    7.90
   5   1 -12  111.29    7.76
   5  -1 -12  113.22    8.42
  -5   1  12  101.88   12.58
  -5  -1  12  104.84   12.71
   5  -1 -12   89.80    8.68
   5   1 -12   95.99    9.01
   5   1 -12  128.90    8.07
   5  -1 -12  132.85    9.21
   5   1 -12   98.61    7.02
   5  -1 -12  134.36    9.14
   5   1 -12  125.58   13.62
   5  -1 -11  213.25   21.92
   5   1 -11  230.41   22.94
  -5  -1  11  269.63   13.67
   5   1 -11  260.31   13.81
   5   1 -11  295.86   14.16
   5  -1 -11  351.36   16.15
   5   1 -11  236.83   15.63
   5  -1 -11  234.79   15.49
   5   1 -11  228.08   20.00
   5   1 -11  314.43   14.31
   5   1 -11  280.02   13.70
   5  -1 -11  350.46   16.50
   5   1 -11  254.99   12.92
   5  -1 -11  339.26   16.10
   5   1 -11  344.17   22.49
   5  -1 -11  341.12   24.93
   5  -1 -10  157.32   17.56
   5   1 -10  173.41   18.53
  -5  -1  10  194.43   10.68
   5   1 -10  205.48   11.09
   5   1 -10  214.51   11.04
   5  -1 -10  234.11   12.59
   5   1 -10  180.87   12.41
   5  -1 -10  178.17   12.30
   5   1 -10  183.04   16.73
   5  -1 -10  252.11   13.21
   5   1 -10  225.86   11.15
   5   1 -10  208.51   10.91
   5  -1 -10  224.61   12.31
   5  -1 -10  191.35   11.01
   5   1 -10  193.04   10.32
   5   1 -10  283.36   18.90
   5  -1 -10  190.51   18.02
  -5  -1   9  613.09   24.34
   5   1  -9  862.54   35.63
   5  -1  -9  735.47   36.90
   5   1  -9  651.48   26.02
   5  -1  -9  707.10   27.27
   5   1  -9  684.22   25.99
  -5   1   9  617.50   32.96
  -5  -1   9  560.59   31.85
   5  -1  -9  778.97   28.27
   5   1  -9  579.80   27.54
   5  -1  -9  584.44   27.61
   5   1  -9  562.12   33.09
   5  -1  -9  639.28   26.53
   5   1  -9  706.89   25.98
   5  -1  -9  657.37   26.93
   5   1  -9  603.77   25.51
   5   1  -9  630.80   25.34
   5  -1  -9  632.32   26.26
   5  -1  -9  488.71   34.40
   5   1  -9  560.68   36.01
   5   1  -8   24.68    6.03
  -5  -1   8   32.72    3.36
   5   1  -8   30.76    3.29
   5   1  -8   34.89    3.36
   5  -1  -8   39.69    4.24
  -5   1   8   26.28    5.28
  -5  -1   8   33.14    5.82
   5  -1  -8   39.43    4.14
   5   1  -8   31.76    6.05
   5   1  -8   37.93    3.50
   5  -1  -8   30.03    3.50
   5  -1  -8   31.88    3.70
   5   1  -8   32.89    3.33
   5  -1  -8   36.04    3.79
  -5  -1   8   28.46    2.71
   5   1  -8   40.20    6.12
   5  -1  -8   36.89    6.61
   5   1  -7  324.97   22.29
   5   1  -7  317.96   20.52
  -5   1   7  354.60   14.15
  -5  -1   7  351.90   14.94
  -5  -1   7  362.08   20.37
   5  -1  -7  355.59   15.99
   5   1  -7  372.35   15.07
   5   1  -7  352.67   15.05
   5  -1  -7  354.48   16.10
  -5   1   7  395.24   21.17
   5   1  -7  356.21   14.86
   5  -1  -7  275.81   14.66
   5   1  -7  357.90   15.17
   5  -1  -7  348.22   15.85
   5   1  -7  285.98   18.66
   5   1  -7  333.31   14.75
   5   1  -7  377.48   14.71
   5  -1  -7  321.62   15.32
  -5  -1   7  318.06   13.64
   5   1  -7  441.46   21.27
   5  -1  -7  307.65   19.95
   5  -1  -6    6.92    2.84
   5   1  -6   12.67    3.96
   5   1  -6    3.50    1.13
  -5  -1   6    4.72    1.23
   5   1  -6    3.89    1.17
   5   1  -6    3.30    1.21
   5   1  -6    6.05    1.39
   5   1  -6    4.61    1.30
   5   1  -6    3.93    1.26
   5   1  -6    3.88    1.19
   5  -1  -6    6.89    1.80
   5   1  -6    4.54    2.13
   5   1  -6    4.27    1.13
   5  -1  -6    7.08    1.58
   5  -1  -6    2.98    1.13
   5   1  -6    4.48    1.24
   5  -1  -6    3.22    1.87
   5   1  -6    5.69    2.25
   5  -1  -5  876.05   43.25
   5   1  -5 1000.50   44.55
  -5  -1   5 1135.18   43.61
   5   1  -5 1113.93   36.81
  -5  -1   5 1087.44   36.77
   5   1  -5  911.80   36.42
   5  -1  -5  930.73   37.01
   5   1  -5 1177.51   37.55
   5  -1  -5 1094.64   37.19
   5   1  -5  955.79   36.67
   5   1  -5  920.36   36.66
   5   1  -5  999.73   36.99
   5  -1  -5  967.34   38.10
   5  -1  -5 1157.36   37.75
   5   1  -5  958.79   42.01
   5  -1  -5  875.70   37.03
   5   1  -5 1059.44   41.17
   5  -1  -5  877.70   39.98
  -5   1   4  253.82   13.10
  -5  -1   4  277.79   15.40
   5   1  -4  204.70   12.40
   5   1  -4  210.34   14.04
   5   1  -4  236.68   15.54
   5  -1  -4  227.83   15.34
  -5   1   3   38.01    4.09
  -5  -1   3   46.54    5.49
   5   1  -3   39.04    4.13
   5   1  -3   37.25    5.47
   5  -1  -3   42.36    5.77
  -5   1   2   51.46    4.68
  -5  -1   2   56.84    6.00
   5   1  -2   53.57    4.30
   5   1  -1 2274.38   74.44
   5   1  -1 2205.91   78.92
   5  -1  -1 2083.72   78.80
   5  -1   0   20.34    5.07
   5  -1   0   19.68    3.52
   5   1   0   16.70    1.59
   5   1   0   20.85    3.50
   5   1   1   98.07    8.41
   5  -1   1   93.21    8.29
  -5  -1  -1   85.21    7.40
  -5   1  -1   84.61    5.53
   5  -1   2  793.78   29.57
   5   1   2  767.40   29.48
   5   1   2  745.12   29.05
   5   1   2  815.58   35.62
   5  -1   2  806.13   35.46
  -5   1  -2  753.42   29.25
  -5  -1  -2  859.83   34.28
  -5  -1  -3 1240.01   47.58
   5   1   3 1131.96   42.01
   5  -1   3 1196.35   42.35
   5   1   3 1175.10   42.35
   5   1   3 1184.44   41.58
   5   1   3 1196.78   41.18
   5   1   3 1274.39   49.83
   5  -1   3 1145.60   48.67
  -5  -1  -4   53.24    6.59
   5  -1   4   66.96    4.70
   5  -1   4   60.14    4.63
   5   1   4   50.64    4.42
   5   1   4   51.20    4.09
  -5   1  -4   59.25    7.76
   5   1   4   44.90    3.67
  -5   1  -4   49.09    4.29
  -5  -1  -5  293.48   17.77
  -5   1  -5  247.00   18.04
   5  -1   5  245.72   11.31
   5  -1   5  247.50   12.38
   5   1   5  274.07   12.86
   5   1   5  244.34   11.78
   5   1   5  264.25   11.50
  -5   1  -5  236.31   12.89
   5  -1   5  261.49   12.34
  -5  -1  -6  636.12   27.75
  -5   1  -6  688.16   36.56
   5  -1   6  735.69   28.59
   5   1   6  694.49   28.44
   5   1   6  685.27   27.37
   5  -1   6  718.44   26.74
   5   1   6  705.85   26.83
  -5   1  -6  721.00   30.20
   5  -1   6  730.53   28.16
   5  -1   7  510.15   22.02
   5   1   7  524.99   22.25
   5   1   7  489.13   20.81
   5  -1   7  497.34   20.00
   5   1   7  523.09   20.30
  -5   1  -7  463.71   21.60
  -5  -1  -7  482.58   21.60
  -5  -1  -7  463.47   30.20
  -5   1  -7  484.29   30.42
   5  -1   7  512.49   21.62
   5  -1   8  712.37   29.43
   5   1   8  697.08   29.30
   5   1   8  682.61   27.85
   5   1   8  700.47   26.95
  -5   1  -8  693.20   29.31
  -5  -1  -8  672.44   28.89
   5  -1   8  743.38   29.00
   5   1   9  180.95   10.97
   5   1   9  166.34    9.48
   5   1   9  172.62    8.64
  -5   1  -9  177.23   10.85
  -5  -1  -9  151.36   10.17
   5  -1   9  150.42    9.74
   5   1  10   14.20    3.00
   5   1  10   16.65    2.62
  -5  -1 -10   18.64    3.26
  -5   1 -10   18.11    3.28
   5  -1  10   18.27    3.06
   5   1  11  187.40   10.00
   5   1  11  203.24   11.94
  -5  -1 -11  186.70   11.56
  -5  -1 -11  172.03   16.28
  -5   1 -11  170.10   17.51
  -5  -1 -11  183.49   12.40
  -5   1 -11  199.28   12.64
  -5   1 -11  196.79   11.87
   5  -1  11  203.05   11.10
   5  -1  12  132.47    9.43
   5   1  12  166.53   10.16
  -5   1 -12  156.12   10.71
  -5  -1 -12  150.69    9.78
   5   1  12  176.55    9.93
   5   1  13  174.57    9.85
   5  -1  13  150.49    9.38
  -5   1 -13  152.97   10.11
  -5  -1 -13  141.48    9.13
   5   1  13  164.54    9.04
   5  -1  14   23.33    3.01
   5   1  14   27.45    3.19
  -5   1 -14   31.99    3.87
   5   1  14   27.42    2.82
   5  -1  14   28.52    3.22
  -5   1 -15    2.85    1.18
  -5  -1 -15    4.27    1.37
   5  -1  15    1.89    0.95
   5   2 -17  130.74    6.67
  -5  -2  17  124.91    6.95
  -5   2  17  137.80    7.27
   5  -2 -16   46.60    4.22
   5   2 -16   43.84    3.78
  -5  -2  16   40.93    4.07
  -5   2  16   43.54    4.26
   5   2 -16   46.37    3.68
   5  -2 -15   10.30    2.49
   5   2 -15   11.53    2.14
   5   2 -15    8.68    1.85
   5   2 -15   10.98    2.15
  -5  -2  15   12.01    2.63
  -5   2  15    5.53    2.05
  -5  -2  14    2.26    1.48
  -5   2  14    1.18    1.43
  -5   2  14    0.70    1.95
  -5  -2  14    0.67    2.29
   5  -2 -14    0.80    1.53
   5   2 -14    0.72    1.09
   5   2 -14    2.12    1.21
   5   2 -14    6.82    1.95
   5   2 -14    1.18    2.01
   5  -2 -13  465.91   35.90
   5   2 -13  426.76   35.23
  -5   2  13  564.30   24.64
  -5  -2  13  561.29   24.07
  -5  -2  13  536.56   24.15
   5   2 -13  513.53   23.10
  -5   2  13  545.00   33.35
  -5  -2  13  517.87   32.33
   5  -2 -13  588.52   25.83
   5   2 -13  578.56   23.43
   5   2 -13  496.69   22.18
   5  -2 -13  622.89   25.83
   5  -2 -13  623.21   25.90
   5   2 -13  644.56   33.41
   5  -2 -12  108.90   15.84
   5   2 -12  138.95   17.89
  -5   2  12  157.06   10.19
  -5  -2  12  177.08   10.33
  -5  -2  12  166.29   10.25
   5   2 -12  153.32    9.45
  -5   2  12  154.36   15.82
  -5  -2  12  152.36   15.33
   5   2 -12  144.52   16.29
   5   2 -12  191.09   10.00
   5  -2 -12  188.54   11.83
   5   2 -12  149.47    8.93
   5  -2 -12  174.81   11.41
   5   2 -12  206.08   16.58
   5  -2 -11    2.69    2.79
   5   2 -11    4.65    3.67
  -5  -2  11    2.05    1.31
  -5  -2  11    3.06    2.42
  -5   2  11    4.48    2.82
   5   2 -11    4.66    1.60
   5   2 -11    3.73    2.75
   5   2 -11    4.38    2.09
   5  -2 -11    5.14    2.23
   5   2 -11    3.31    1.23
   5  -2 -11    2.72    1.98
   5   2 -11   11.56    2.31
   5   2 -11    5.22    1.68
   5  -2 -11    5.69    2.17
   5   2 -11    6.71    3.30
   5  -2 -10    0.82    2.28
   5   2 -10    0.85    2.04
  -5  -2  10    0.77    1.03
   5   2 -10    0.51    0.89
   5   2 -10    1.39    2.16
   5   2 -10    2.58    1.69
   5  -2 -10    1.39    1.34
   5   2 -10    0.64    0.95
   5  -2 -10    1.62    1.76
   5   2 -10    2.49    1.29
   5  -2 -10    0.95    1.71
   5   2 -10    0.50    1.04
   5   2 -10    0.14    0.76
   5  -2 -10   -0.27    1.50
  -5  -2  10    1.03    0.84
   5   2 -10    3.11    2.39
  -5  -2   9  377.80   15.99
   5   2  -9  466.34   24.68
   5   2  -9  372.01   16.67
  -5   2   9  381.14   23.27
   5  -2  -9  455.79   20.14
   5   2  -9  382.91   16.19
  -5  -2   9  370.11   22.81
   5   2  -9  355.82   16.61
   5  -2  -9  341.49   18.25
   5   2  -9  347.16   18.29
   5   2  -9  331.94   24.23
   5   2  -9  377.46   16.72
   5   2  -9  406.59   16.89
   5  -2  -9  360.30   18.17
   5   2  -9  380.15   16.13
   5  -2  -9  310.13   24.93
   5   2  -9  313.61   25.04
   5  -2  -8  879.37   47.87
   5   2  -8  832.30   47.56
   5   2  -8 1061.91   37.40
  -5  -2   8  986.59   44.82
   5   2  -8 1086.73   38.12
   5  -2  -8 1188.96   42.25
   5   2  -8  969.33   37.77
  -5   2   8 1043.54   45.60
  -5  -2   8 1054.88   38.36
   5   2  -8 1104.91   38.15
   5   2  -8 1065.50   38.19
   5   2  -8  944.88   37.05
   5   2  -8  907.86   42.70
   5  -2  -8  831.00   38.41
   5  -2  -8  967.90   38.84
  -5  -2   8  977.29   36.82
   5   2  -8 1204.71   47.33
   5  -2  -7  512.19   29.92
   5   2  -7  507.74   29.92
   5   2  -7  542.23   21.35
  -5  -2   7  548.76   21.99
   5   2  -7  532.15   21.69
   5  -2  -7  674.30   27.03
   5   2  -7  544.07   21.79
  -5   2   7  577.93   28.25
  -5  -2   7  527.09   27.12
   5   2  -7  575.14   22.00
   5   2  -7  506.60   21.63
   5  -2  -7  772.49   31.53
   5   2  -7  538.99   21.99
   5  -2  -7  504.55   22.55
   5  -2  -7  434.41   21.77
   5   2  -7  484.84   26.06
   5   2  -7  653.31   29.73
   5  -2  -6  728.03   37.24
   5   2  -6  739.95   37.55
   5   2  -6  709.75   36.28
  -5  -2   6  841.52   37.62
  -5  -2   6  791.81   29.72
   5   2  -6  943.71   29.75
   5  -2  -6  955.48   36.30
   5   2  -6  751.25   29.45
  -5   2   6  852.21   35.85
  -5  -2   6  835.29   35.36
   5   2  -6  902.44   30.26
   5  -2  -6  924.34   39.61
   5   2  -6  728.33   29.53
   5   2  -6  724.46   34.43
   5  -2  -6  567.65   28.76
   5  -2  -6  691.91   30.28
   5   2  -6  886.51   37.25
  -5  -2   6  815.34   29.11
   5  -2  -5   23.13    4.71
   5   2  -5   30.17    5.52
  -5  -2   5   28.56    5.06
  -5   2   5   24.37    3.41
   5   2  -5   31.58    2.86
  -5  -2   5   28.43    2.87
   5   2  -5   34.85    3.14
   5  -2  -5   30.75    3.10
   5  -2  -5   24.73    4.07
   5   2  -5   31.03    3.03
   5   2  -5   29.72    3.15
   5   2  -5   29.95    2.98
   5  -2  -5   25.75    5.32
   5   2  -5   30.59    2.97
   5   2  -5   26.99    4.63
   5   2  -5   31.97    5.10
  -5  -2   5   27.80    2.58
   5  -2  -4  779.62   34.11
   5   2  -4  785.96   34.53
  -5  -2   4  788.59   27.75
   5   2  -4  700.52   27.09
  -5   2   4  789.89   29.05
  -5  -2   4  925.13   35.40
   5  -2  -4  740.87   33.00
   5   2  -4  711.49   27.28
   5   2  -4  703.50   27.61
   5   2  -4  666.62   27.23
   5   2  -4  724.22   27.34
   5  -2  -4  629.32   28.63
   5   2  -4  826.67   33.28
   5   2  -3  329.89   16.94
   5   2  -3  317.48   13.55
   5   2  -3  350.07   13.84
   5   2  -3  300.07   13.58
   5  -2  -3  314.10   14.33
   5   2  -3  288.05   13.42
   5  -2  -3  352.41   18.88
   5   2  -3  340.35   18.96
  -5   2   3  362.83   14.93
  -5  -2   3  406.98   19.75
   5   2  -2  129.07    8.59
  -5  -2   2  157.39   11.15
   5   2  -1   56.82    5.81
   5  -2  -1   65.20    6.31
   5   2   0   90.48    5.62
  -5   2   0  106.50    5.35
   5   2   0  107.17    8.42
  -5  -2  -1 1582.69   58.46
   5   2   1 1484.50   51.71
   5   2   1 1418.34   51.29
   5   2   1 1585.08   57.57
   5  -2   1 1586.42   57.66
  -5   2  -1 1338.22   50.85
   5  -2   2  354.55   14.59
   5   2   2  356.87   14.76
   5   2   2  335.96   19.48
   5  -2   2  387.86   20.48
   5   2   2  400.33   19.00
  -5  -2  -2  375.16   20.36
  -5  -2  -3   48.81    6.62
   5   2   3   37.47    3.83
   5  -2   3   54.74    4.38
   5   2   3   40.58    3.72
   5  -2   3   53.88    4.12
   5   2   3   49.00    3.79
   5   2   3   47.86    5.65
  -5   2  -3   42.93    3.88
   5   2   3   50.59    6.91
   5  -2   3   59.99    7.29
  -5  -2  -4   55.24    7.23
  -5   2  -4   58.93    7.85
  -5  -2  -4   45.20    7.14
   5  -2   4   58.46    4.67
   5   2   4   49.13    4.42
   5  -2   4   63.71    4.72
   5   2   4   49.96    4.30
  -5  -2  -4   48.92    3.81
   5   2   4   51.56    4.07
   5   2   4   53.73    5.96
  -5   2  -4   50.39    4.56
   5   2   4   52.08    7.27
   5  -2   4   64.99    7.99
  -5  -2  -5 2316.27   89.00
  -5  -2  -5 2265.48   90.31
  -5   2  -5 2147.17   89.39
   5   2   5 2390.24   80.20
   5  -2   5 2202.12   80.25
   5   2   5 2297.01   80.67
   5   2   5 2357.89   80.28
  -5  -2  -5 2109.98   78.95
   5   2   5 2276.27   79.45
   5   2   5 2472.03   84.59
  -5   2  -5 2250.85   81.32
  -5  -2  -6  311.26   20.16
  -5  -2  -6  287.05   20.97
  -5   2  -6  270.97   20.26
   5   2   6  267.19   13.30
  -5  -2  -6  268.30   12.60
   5  -2   6  278.87   13.64
   5   2   6  277.33   13.75
   5   2   6  271.77   13.22
   5   2   6  265.92   12.59
   5   2   6  271.46   15.57
   5   2   7  114.18    7.29
   5  -2   7   97.37    7.10
   5   2   7  106.77    7.50
   5   2   7  103.48    6.51
  -5   2  -7   71.59    6.16
   5   2   7  120.20    7.59
  -5  -2  -7   90.00    6.25
   5  -2   7   93.24    6.96
   5   2   8    2.73    1.36
   5  -2   8    3.31    1.27
   5   2   8    4.05    1.63
   5   2   8    1.96    1.13
  -5   2  -8    3.09    1.49
  -5  -2  -8    2.68    1.21
   5   2   8    3.51    1.52
   5  -2   8    1.27    1.36
   5  -2   9  249.89   13.76
   5   2   9  271.33   14.11
   5   2   9  270.10   13.42
   5   2   9  245.00   11.95
  -5   2  -9  218.33   13.06
   5  -2   9  243.40   13.45
   5   2   9  285.02   14.02
  -5  -2  -9  256.06   12.64
   5  -2  10  417.59   19.07
   5   2  10  395.23   18.65
   5   2  10  363.07   17.31
   5   2  10  345.91   15.72
  -5   2 -10  373.04   18.21
   5  -2  10  387.81   18.18
   5   2  10  401.88   18.28
   5   2  11  348.60   16.92
   5  -2  11  314.20   16.49
   5   2  11  317.45   15.46
  -5   2 -11  328.63   25.47
  -5   2 -11  347.85   18.04
  -5  -2 -11  353.84   18.25
   5  -2  11  310.34   15.99
   5   2  11  370.37   16.60
   5   2  12   11.03    2.08
   5  -2  12    9.82    2.34
   5   2  12   14.20    2.74
  -5   2 -12   16.25    3.25
  -5  -2 -12   11.77    2.86
   5   2  12   12.63    2.34
   5   2  13   70.58    5.51
   5  -2  13   58.51    5.08
  -5   2 -13   68.49    6.06
  -5  -2 -13   68.45    6.09
  -5   2 -14  366.16   16.42
  -5  -2 -14  367.52   16.50
   5  -2  14  347.93   15.64
  -5   2 -15    9.05    1.61
  -5  -2 -15    4.58    1.29
   5  -2  15    6.15    1.27
   5  -3 -17    3.40    1.06
   5   3 -17    3.77    0.94
   5  -3 -17    4.14    0.92
   5   3 -16    5.71    1.36
   5  -3 -16    8.94    1.96
   5   3 -16    5.80    1.24
   5   3 -16    6.78    1.46
  -5  -3  16    7.48    1.65
  -5   3  16    6.12    1.56
   5   3 -15    3.45    1.35
   5  -3 -15    6.39    2.16
   5   3 -15    4.71    1.38
   5   3 -15    3.30    1.21
   5   3 -15    4.55    1.43
  -5   3  15    3.62    1.64
  -5  -3  15    2.10    1.32
   5   3 -14  331.71   14.70
   5  -3 -14  336.45   17.16
   5   3 -14  302.24   14.50
  -5   3  14  306.49   15.60
  -5  -3  14  308.25   15.41
  -5   3  13   21.73    3.48
  -5  -3  13   20.95    3.36
  -5  -3  13   23.48    3.44
  -5   3  13   19.89    5.53
  -5  -3  13   24.58    6.02
   5   3 -13   21.32    3.06
   5  -3 -13   22.39    3.96
   5   3 -13   19.79    2.66
   5   3 -13   25.26    3.17
   5   3 -13   27.24    5.83
   5  -3 -13   14.04    5.72
   5   3 -13   16.04    5.92
   5  -3 -12   13.78    5.44
   5   3 -12    6.61    4.39
  -5  -3  12   15.10    2.91
  -5   3  12   14.07    2.82
  -5  -3  12   14.94    2.75
  -5   3  12   24.39    6.06
  -5  -3  12   10.81    3.98
   5   3 -12   14.46    2.57
   5   3 -12   16.04    5.53
   5  -3 -12   13.71    3.18
   5   3 -12   12.33    2.20
   5   3 -12   12.31    2.40
   5   3 -12   15.15    4.71
   5  -3 -11   74.95    7.08
  -5  -3  11   54.49    5.38
  -5   3  11   70.48    6.04
  -5  -3  11   59.11    5.44
   5  -3 -11   71.66    7.40
   5   3 -11   65.95    5.36
   5   3 -11   63.82    5.04
   5   3 -11   65.14    5.42
  -5   3  11   55.22    9.00
  -5  -3  11   61.23    9.16
   5  -3 -11   42.70    9.16
   5   3 -11   48.12    9.77
   5   3 -11   77.51    9.66
  -5  -3  10  347.65   15.89
  -5   3  10  311.49   21.91
  -5  -3  10  270.97   20.34
   5   3 -10  293.82   14.71
   5   3 -10  330.84   15.08
   5   3 -10  314.60   14.89
   5  -3 -10  386.87   20.79
  -5  -3  10  317.40   14.61
   5   3 -10  372.82   22.73
   5  -3 -10  212.50   21.55
   5   3 -10  214.36   22.10
   5  -3  -9   40.47    8.56
   5   3  -9   41.21    8.61
  -5  -3   9   63.83    5.45
   5   3  -9   60.76    5.14
   5   3  -9   61.46    4.65
   5   3  -9   57.96    4.99
  -5  -3   9   64.33    4.47
   5   3  -9   66.31    5.32
   5   3  -9   62.39    5.08
   5   3  -9   64.38    5.19
   5   3  -9   58.58    4.51
   5   3  -9   67.63    7.80
  -5  -3   9   60.19    4.81
   5   3  -9   66.51    8.93
   5   3  -8    1.91    2.17
   5  -3  -8    2.94    1.49
  -5  -3   8    2.67    1.15
   5   3  -8    1.56    2.17
  -5   3   8    2.83    2.18
   5   3  -8    2.51    1.01
  -5  -3   8    3.07    2.20
   5   3  -8    3.12    1.47
   5   3  -8    2.58    1.23
  -5  -3   8    1.34    0.78
   5   3  -8    4.38    1.48
   5   3  -8    2.85    1.26
   5   3  -8    1.64    1.21
   5   3  -8    1.84    1.05
   5   3  -8    5.40    2.34
   5  -3  -8    3.95    2.90
   5   3  -8    2.70    2.49
   5  -3  -7  102.64   11.72
   5   3  -7  100.46   11.69
   5  -3  -7  124.08    8.33
   5   3  -7  119.68   12.30
   5   3  -7  103.04    6.29
  -5  -3   7  115.80    7.23
   5   3  -7  105.78    6.77
  -5   3   7  112.20   10.48
  -5  -3   7  109.65   10.08
  -5  -3   7  106.36    5.97
   5   3  -7  100.41    6.70
   5   3  -7  104.97    6.94
   5  -3  -7  122.00   14.00
   5   3  -7  108.87    9.95
   5   3  -7  117.89   11.60
   5   3  -6  772.53   35.65
  -5  -3   6  743.07   27.17
   5   3  -6  705.16   27.25
  -5  -3   6  699.99   32.29
  -5   3   6  765.39   33.44
   5   3  -6  679.84   27.24
   5  -3  -6  677.20   37.77
   5   3  -6  659.60   26.94
   5   3  -6  702.64   32.69
   5  -3  -6  659.04   34.80
   5   3  -6  697.33   35.58
   5   3  -5  803.52   38.19
   5  -3  -5  740.42   36.91
   5   3  -5  915.51   30.45
   5   3  -5  773.24   30.52
  -5   3   5  861.33   36.28
  -5  -3   5  770.46   34.87
   5   3  -5  871.59   30.61
   5  -3  -5  827.72   37.28
   5   3  -5  769.84   30.66
   5   3  -5  739.25   30.25
   5   3  -5  850.68   29.77
   5   3  -5  889.47   38.36
  -5  -3   5  764.99   30.25
   5  -3  -4  186.11   13.59
   5   3  -4  200.83   14.43
  -5  -3   4  195.45    9.91
   5   3  -4  232.22    9.66
   5   3  -4  192.82    9.46
   5   3  -4  224.25    9.70
   5   3  -4  208.66    9.74
   5  -3  -4  173.16   10.97
   5   3  -4  202.20    9.90
   5   3  -4  187.34    9.60
   5   3  -4  196.02    9.65
   5   3  -4  212.44    9.22
   5  -3  -4  153.07   11.09
   5   3  -4  213.77   14.05
  -5  -3   4  198.04    9.46
  -5  -3   3  207.52    9.98
   5   3  -3  232.04    9.68
   5   3  -3  195.71    9.58
   5   3  -3  205.05    9.73
   5   3  -3  195.77    9.75
   5   3  -3  193.75    9.20
   5  -3  -3  172.24   11.82
   5   3  -3  198.16    9.73
   5   3  -3  214.08   13.20
  -5  -3   2 1708.38   54.21
   5   3  -2 1703.59   54.49
   5   3  -2 1502.99   54.46
  -5  -3   2 1686.02   54.61
   5   3  -2 1597.67   54.72
   5   3  -2 1405.39   54.35
   5   3  -2 1400.15   54.28
   5  -3  -2 1201.67   56.91
   5   3  -2 1490.49   54.15
   5   3  -2 1500.13   58.19
   5   3  -1  473.27   19.18
   5   3  -1  485.10   19.22
   5   3  -1  448.11   18.83
   5   3  -1  450.20   18.87
  -5  -3   1  502.70   18.67
  -5  -3   1  529.22   19.25
   5   3  -1  553.16   19.48
  -5  -3   0 1057.89   40.10
  -5  -3   0 1115.43   40.71
   5   3   0 1129.54   40.88
   5   3   0 1092.95   40.58
   5   3   0 1206.55   45.48
   5  -3   0 1231.95   45.76
  -5  -3  -1    0.76    0.75
  -5  -3  -1    1.76    1.84
   5  -3   1    1.89    0.91
   5  -3   1    1.37    0.87
   5   3   1    1.51    0.92
   5   3   1    1.00    0.85
   5   3   1    2.92    1.97
   5   3   1   -0.32    1.09
   5  -3   1    3.83    1.78
  -5   3  -1    0.52    0.68
  -5  -3  -2  104.23   10.57
   5   3   2   78.19    5.70
   5  -3   2  107.28    6.04
   5  -3   2  112.78    6.49
  -5  -3  -2   85.08    5.97
   5   3   2   76.37    5.42
   5   3   2   85.84    8.54
   5  -3   2  100.89    9.32
   5   3   2   81.33    8.36
  -5   3  -2   95.56    7.01
  -5  -3  -3   20.78    4.62
  -5   3  -3   18.85    4.54
   5   3   3   22.63    2.79
  -5  -3  -3   19.70    2.61
   5  -3   3   18.09    2.41
   5   3   3   13.65    2.09
  -5  -3  -3   15.45    2.54
   5   3   3   24.86    4.57
  -5   3  -3   15.11    2.84
   5   3   3   22.74    4.65
   5  -3   3   17.66    4.20
  -5  -3  -3   19.86    4.90
  -5  -3  -4  425.42   25.52
  -5  -3  -4  429.61   24.88
  -5   3  -4  460.36   25.55
   5  -3   4  443.12   18.28
   5   3   4  398.20   17.93
   5   3   4  447.40   18.20
   5   3   4  304.81   16.37
   5  -3   4  455.13   18.11
  -5  -3  -4  450.84   17.99
   5   3   4  412.57   17.55
   5  -3   4  474.30   25.25
  -5   3  -4  363.03   19.10
   5   3   4  475.06   23.39
   5   3   4  428.30   24.28
   5  -3   5   58.01    5.77
  -5  -3  -5   59.69    8.58
  -5  -3  -5   58.16    8.69
  -5   3  -5   55.28    8.35
   5  -3   5   53.95    4.80
   5   3   5   47.26    4.27
  -5  -3  -5   58.02    4.81
   5  -3   5   55.36    4.90
   5   3   5   66.84    5.33
   5   3   5   67.35    5.09
   5   3   5   74.51    8.04
  -5   3  -5   49.29    5.55
   5   3   5   63.97    8.49
   5  -3   5   56.79    8.06
  -5  -3  -6  110.00   12.28
   5  -3   6  108.31    7.43
   5  -3   6  110.43    7.52
   5   3   6  115.87    7.79
   5  -3   6  105.93    7.53
   5   3   6  111.03    7.10
  -5  -3  -6  108.55    7.29
   5   3   6  132.61    7.72
   5   3   6  129.45   11.03
   5   3   6  143.09   13.36
   5  -3   6  101.16   11.30
   5  -3   7   10.83    2.23
  -5  -3  -7    5.40    1.79
   5   3   7   12.95    2.62
   5   3   7   10.68    2.32
   5  -3   7    7.83    2.04
  -5  -3  -7    9.58    2.11
   5   3   7   10.02    2.04
   5   3   7   12.29    2.26
   5   3   7    9.91    2.92
   5  -3   7    4.70    2.73
   5  -3   8  337.23   14.91
  -5  -3  -8  282.36   14.73
   5  -3   8  320.23   15.09
   5   3   8  313.51   15.21
   5   3   8  316.49   15.05
   5   3   8  278.62   13.79
  -5  -3  -8  303.48   14.46
   5   3   8  309.99   14.17
   5  -3   8  305.72   21.87
   5  -3   9  491.34   20.97
  -5  -3  -9  442.17   21.35
   5  -3   9  459.64   21.41
   5   3   9  540.09   22.43
   5   3   9  506.98   21.72
   5  -3   9  400.92   20.87
  -5  -3  -9  473.53   20.96
   5   3   9  481.30   20.34
   5   3   9  537.54   31.50
   5  -3   9  476.41   29.84
   5  -3  10   62.83    5.30
  -5  -3 -10   62.20    5.84
  -5   3 -10   58.51   10.65
  -5   3 -10   58.56    6.36
  -5  -3 -10   65.10    6.65
   5   3  10   61.23    5.83
   5  -3  10   64.04    5.86
   5   3  10   60.40    5.53
   5  -3  10   61.34    5.79
  -5  -3 -10   73.26    5.73
   5   3  10   55.04    4.68
   5   3  10   52.35    9.17
   5  -3  10   58.94    9.50
  -5   3 -11   13.01    3.14
  -5  -3 -11   10.38    2.72
  -5  -3 -11   14.84    2.82
   5   3  11   16.91    2.79
   5  -3  11   10.62    2.49
   5   3  11   13.39    2.79
   5  -3  11    9.87    2.43
   5   3  11   14.33    2.07
   5   3  11   15.58    4.88
   5  -3  11   10.75    4.24
  -5  -3 -11   10.85    2.26
  -5  -3 -12  408.88   18.56
  -5  -3 -12  437.44   19.84
  -5   3 -12  450.93   19.95
   5  -3  12  397.98   18.19
   5   3  12  403.08   18.39
   5   3  12  377.39   17.47
   5  -3  12  403.74   18.28
  -5   3 -13  166.24    9.81
  -5  -3 -13  187.89   10.27
  -5  -3 -13  168.45    9.34
   5   3  13  155.46    8.39
  -5  -3 -13  188.67    9.90
  -5   3 -14    0.51    1.01
  -5  -3 -14    1.52    0.95
  -5  -4  17    4.66    1.05
   5  -4 -16  271.17   12.15
   5  -4 -16  297.33   12.78
   5   4 -15    5.25    1.25
   5   4 -15    6.91    1.49
   5  -4 -15    7.63    2.00
   5   4 -15    5.25    1.35
   5  -4 -15    7.52    2.21
   5   4 -14   92.04    5.83
   5  -4 -14   98.64    7.92
   5   4 -14   78.71    5.59
   5   4 -14   85.49    5.75
  -5   4  14   84.15    6.04
  -5  -4  13    7.75    2.05
  -5   4  13    9.24    2.24
  -5  -4  13    8.37    2.21
   5   4 -13    8.35    1.92
   5  -4 -13    5.69    2.38
   5   4 -13   11.08    2.15
   5   4 -13    9.90    1.97
   5   4 -13    9.68    3.49
   5  -4 -12  289.04   16.40
  -5  -4  12  228.29   22.03
   5   4 -12  260.83   13.40
  -5  -4  12  279.24   21.16
  -5  -4  12  263.90   14.00
  -5  -4  12  301.64   14.94
  -5   4  12  280.86   14.18
   5   4 -12  271.92   12.77
   5   4 -12  300.43   13.75
   5  -4 -12  207.11   21.05
   5   4 -12  351.94   21.68
   5  -4 -11   38.90    5.22
  -5  -4  11   31.29    7.74
  -5  -4  11   37.74    4.49
  -5   4  11   35.26    4.19
  -5  -4  11   39.07    4.38
   5   4 -11   43.31    4.31
  -5  -4  11   31.77    6.77
   5   4 -11   43.80    4.41
   5   4 -11   40.17    3.87
   5   4 -11   44.87    4.31
  -5  -4  11   43.18    4.34
   5   4 -11   40.94    7.23
   5  -4 -11   21.65    6.54
   5  -4 -10    2.29    2.12
   5   4 -10   -0.78    1.87
   5   4 -10   -0.82    1.97
   5  -4 -10    2.47    1.66
  -5  -4  10    1.63    2.27
  -5  -4  10    0.22    1.22
  -5  -4  10    1.57    1.28
  -5   4  10    0.98    1.09
  -5   4  10    2.29    2.11
  -5  -4  10    0.57    1.96
   5   4 -10    1.67    1.24
  -5  -4  10    0.15    0.82
   5   4 -10    3.09    1.45
   5   4 -10    2.33    1.12
   5   4 -10    2.22    1.26
  -5  -4  10    1.98    1.26
   5   4 -10    1.16    1.97
   5  -4  -9   35.82    7.70
   5   4  -9   31.16    7.31
   5  -4  -9   58.16    6.21
   5   4  -9   39.83    8.42
  -5  -4   9   35.31    7.87
  -5  -4   9   43.61    4.66
   5   4  -9   45.90    4.50
  -5   4   9   65.59    8.77
  -5  -4   9   43.38    7.25
  -5  -4   9   50.63    4.17
   5   4  -9   55.47    4.93
   5   4  -9   53.86    4.82
   5   4  -9   55.29    4.87
   5   4  -9   45.76    4.56
   5   4  -9   44.58    6.48
   5   4  -9   55.69    8.64
  -5  -4   9   51.44    4.59
   5  -4  -8  298.36   15.86
  -5  -4   8  233.49   20.59
   5   4  -8  260.76   21.30
  -5  -4   8  287.73   13.38
   5   4  -8  320.50   21.87
   5   4  -8  253.10   13.36
   5   4  -8  289.50   12.73
   5   4  -8  272.39   13.51
  -5  -4   8  279.45   12.67
   5   4  -8  286.15   13.67
   5   4  -8  282.31   13.68
   5   4  -8  279.38   13.69
   5   4  -8  300.54   18.17
   5  -4  -8  203.39   19.00
   5   4  -8  219.47   19.50
   5  -4  -7  109.47    8.34
  -5  -4   7   94.13   11.98
   5   4  -7  133.53   13.01
   5   4  -7  102.96    6.90
  -5  -4   7  102.40    9.97
  -5   4   7   92.74    9.62
  -5  -4   7  101.08    6.22
   5   4  -7  114.08    7.17
   5   4  -7  113.63    7.18
   5   4  -7  111.87    7.34
   5   4  -7  100.39    6.59
   5   4  -7  113.73   10.45
   5  -4  -7   92.66   11.20
   5   4  -7   82.40   10.65
   5   4  -6  136.67   13.06
   5  -4  -6  127.67   12.74
  -5  -4   6  149.76    9.08
   5   4  -6  158.70    8.88
  -5   4   6  158.13   12.18
  -5  -4   6  154.15   12.04
   5  -4  -6  167.00   10.33
  -5  -4   6  174.87   15.43
   5   4  -6  158.00    8.96
   5   4  -6  166.86    9.41
   5   4  -6  157.17    8.82
   5   4  -6  175.42   13.32
   5   4  -6  158.06    8.48
   5   4  -6  177.21   14.81
  -5  -4   6  167.79    8.99
   5   4  -5  112.26   10.89
   5  -4  -5  102.03   10.48
   5  -4  -5  140.66    8.78
  -5  -4   5  126.63   12.40
  -5  -4   5  124.31    7.74
  -5   4   5  131.38   10.33
  -5  -4   5  120.81    9.95
   5   4  -5  124.43    7.51
   5   4  -5  117.68    6.96
   5   4  -5  117.59    7.12
   5   4  -5  126.87   12.01
  -5  -4   5  130.46    7.45
  -5  -4   4  834.49   37.91
  -5  -4   4  782.84   29.63
  -5   4   4  760.45   32.81
  -5  -4   4  740.08   32.57
   5   4  -4  757.42   28.66
   5  -4  -4  681.91   27.81
   5   4  -4  737.04   29.17
   5   4  -4  794.04   28.97
   5   4  -4  732.30   28.78
   5   4  -4  748.63   27.84
   5   4  -4  741.48   29.00
   5   4  -4  817.44   36.42
  -5  -4   4  781.28   29.01
  -5  -4   3   69.94    8.20
  -5  -4   3   58.01    4.77
   5   4  -3   59.01    4.13
   5   4  -3   61.81    4.58
   5   4  -3   63.47    4.68
   5   4  -3   53.56    4.47
   5   4  -3   59.67    4.20
   5   4  -3   56.24    4.63
   5   4  -3   50.11    6.65
   5   4  -2  237.07   10.27
  -5  -4   2  198.70   10.66
   5   4  -2  192.79   10.27
   5   4  -2  217.91   10.65
   5   4  -2  206.02   10.11
   5   4  -2  200.33   10.48
  -5  -4   2  230.38   10.50
  -5  -4   2  213.25   10.58
   5   4  -1   10.42    1.85
  -5  -4   1   10.04    1.93
   5   4  -1    7.52    1.62
  -5  -4   1   13.68    1.97
  -5  -4   1   12.20    2.03
   5   4   0 1001.54   37.94
  -5  -4   0 1048.13   38.48
  -5  -4   0 1017.23   37.90
   5   4   0  996.70   37.82
  -5  -4   0 1048.90   47.57
  -5  -4  -1   66.17    9.17
  -5  -4  -1   71.47    7.86
  -5   4  -1   59.87    6.95
   5   4   1   64.98    5.11
   5  -4   1   76.49    4.98
  -5  -4  -1   62.40    5.07
   5   4   1   62.30    4.87
   5   4   1   61.16    6.49
   5  -4   1   69.94    7.10
   5   4   1   67.79    8.26
  -5   4  -1   63.40    6.27
  -5  -4  -2  945.64   45.92
  -5  -4  -2  885.24   41.25
  -5   4  -2  827.64   39.86
   5   4   2  993.25   35.95
  -5  -4  -2  868.27   35.80
   5  -4   2  898.16   34.55
   5  -4   2  902.21   34.93
   5   4   2 1009.98   35.62
   5   4   2 1110.28   44.61
  -5   4  -2 1009.39   39.19
   5   4   2  826.46   38.75
   5  -4   2  958.40   40.58
   5  -4   3  289.47   15.30
   5  -4   3  264.42   14.58
  -5  -4  -3  284.37   20.69
  -5   4  -3  229.35   16.51
  -5  -4  -3  256.66   17.97
   5   4   3  288.83   13.31
   5  -4   3  262.74   12.75
   5  -4   3  251.75   12.28
  -5  -4  -3  226.03   13.07
   5   4   3  274.74   12.87
   5  -4   3  225.08   16.27
   5   4   3  326.91   19.57
   5   4   3  221.81   15.62
  -5   4  -3  252.20   15.42
  -5  -4  -4  519.83   30.51
  -5   4  -4  513.75   29.41
  -5  -4  -4  594.37   24.45
   5  -4   4  608.27   23.61
  -5  -4  -4  499.28   24.41
   5   4   4  599.66   24.22
   5  -4   4  620.18   26.27
  -5  -4  -4  583.10   33.76
   5  -4   4  616.56   24.85
   5   4   4  456.50   27.50
   5  -4   4  536.39   29.61
   5   4   4  654.04   31.50
  -5   4  -4  553.44   27.11
   5  -4   5   99.89    6.95
  -5  -4  -5   96.78    7.89
  -5  -4  -5  105.40    7.37
   5   4   5   97.82    7.17
   5   4   5   81.61    9.77
   5  -4   5   96.87   10.79
   5   4   5  110.18   11.12
  -5  -4  -5  110.28   12.68
   5  -4   5  101.00    7.36
  -5  -4  -6  782.06   40.56
   5  -4   6  734.20   29.28
   5   4   6  643.40   27.97
   5   4   6  747.41   29.39
   5  -4   6  669.31   28.32
   5  -4   6  735.54   28.95
  -5  -4  -6  612.64   29.93
  -5  -4  -6  731.41   29.28
   5   4   6  730.48   28.83
   5   4   6  636.27   34.92
   5  -4   6  687.27   36.03
   5   4   6  789.90   36.43
   5  -4   7  221.52   12.48
  -5  -4  -7  219.09   12.37
   5   4   7  228.08   12.17
   5  -4   7  205.76   11.79
   5   4   7  246.49   12.96
   5  -4   7  223.96   12.44
  -5  -4  -7  226.39   12.56
   5   4   7  251.93   12.55
   5   4   7  225.13   17.97
   5  -4   7  221.39   17.74
   5   4   7  250.19   17.41
   5  -4   8   58.27    5.50
  -5  -4  -8   71.99    6.06
   5  -4   8   59.76    5.42
   5   4   8   45.88    4.88
   5  -4   8   71.16    6.05
  -5  -4  -8   56.57    5.50
   5   4   8   44.81    4.71
   5  -4   8   56.94    8.93
   5   4   8   41.23    7.77
   5  -4   9   48.53    4.83
  -5  -4  -9   37.10    4.41
  -5   4  -9   33.64    8.17
  -5   4  -9   32.13    4.47
  -5  -4  -9   36.81    4.95
   5   4   9   31.83    4.05
   5  -4   9   35.35    4.18
   5  -4   9   48.30    5.01
  -5  -4  -9   38.94    4.52
   5   4   9   29.34    3.68
   5  -4   9   39.31    7.29
   5  -4  10  405.75   17.56
  -5  -4 -10  365.96   17.79
  -5   4 -10  352.50   27.75
  -5   4 -10  343.74   17.91
  -5  -4 -10  385.01   18.97
   5   4  10  370.97   17.45
   5  -4  10  385.33   17.62
   5   4  10  355.04   17.40
  -5  -4 -10  386.54   19.22
  -5  -4 -10  398.68   17.73
   5   4  10  367.04   16.67
  -5  -4 -10  363.80   18.26
  -5  -4 -11   32.06    3.77
  -5   4 -11   26.23    3.75
   5   4  11   25.43    3.38
  -5  -4 -11   32.16    4.24
   5   4  11   22.24    2.77
  -5  -4 -11   28.11    3.54
   5   4  12   21.59    2.87
  -5   4 -12   22.00    3.10
  -5  -4 -12   16.99    2.66
   5  -4  12   20.90    2.97
  -5  -4 -12   25.80    3.50
  -5  -4 -13    0.30    0.90
   5   4  13    0.45    0.73
   5  -4  13    1.45    1.06
  -5  -5  16   60.46    4.16
   5  -5 -16   60.14    4.22
   5  -5 -15    7.22    1.69
   5   5 -15    5.53    1.19
   5  -5 -15   10.52    2.25
   5  -5 -14  148.14    8.88
   5  -5 -14  153.10    9.57
   5   5 -14  110.36    6.35
   5   5 -14  112.50    6.57
   5   5 -13   64.62    4.75
   5  -5 -13   70.61    6.71
   5  -5 -13   65.36    6.57
   5   5 -13   62.55    4.79
   5   5 -13   57.87    4.54
   5   5 -12   50.56    4.46
   5   5 -12   48.69    4.42
   5  -5 -12   59.53    6.74
   5   5 -12   51.58    4.49
   5  -5 -12   57.14    6.29
  -5  -5  12   53.88    5.28
   5   5 -11   13.04    2.46
   5  -5 -11   18.59    4.22
  -5  -5  11   15.44    2.50
   5   5 -11   12.10    2.06
   5   5 -11   12.02    2.35
   5   5 -11   16.65    2.71
   5   5 -11   14.25    2.42
   5  -5 -11   15.05    3.45
  -5  -5  11   11.96    4.92
  -5  -5  11   12.08    2.42
   5   5 -11   13.83    4.45
   5   5 -10  679.14   28.05
   5  -5 -10  737.64   34.06
  -5  -5  10  705.77   27.45
   5   5 -10  726.98   28.50
   5   5 -10  662.95   27.90
   5   5 -10  693.52   27.99
   5  -5 -10  653.84   30.86
  -5  -5  10  716.15   28.43
   5   5 -10  766.65   38.11
  -5  -5   9   91.68    7.10
   5   5  -9   91.00    6.59
  -5  -5   9   83.75    5.90
   5  -5  -9   65.71    8.13
   5   5  -9   85.07    6.66
   5   5  -9   92.15    6.56
   5   5  -9   82.00    6.34
   5   5  -9   83.58    6.41
  -5  -5   9   84.23    6.38
   5   5  -9   92.96   11.52
   5  -5  -9   80.27    7.82
  -5  -5   9   70.12   11.18
   5  -5  -8    4.95    1.97
  -5  -5   8    3.77    2.97
  -5  -5   8    1.55    1.28
   5   5  -8    3.35    1.44
   5  -5  -8    5.28    2.35
  -5  -5   8    1.87    1.15
   5   5  -8    2.26    1.39
   5   5  -8    2.87    1.49
   5   5  -8    2.96    1.53
   5   5  -8    1.25    1.65
  -5  -5   8    2.58    1.45
   5   5  -8    2.61    2.23
   5  -5  -7   45.41    7.16
  -5  -5   7   69.85   10.47
  -5  -5   7   75.35    6.22
   5   5  -7   67.91    5.59
  -5  -5   7   73.98    5.40
   5  -5  -7   58.86    6.30
   5   5  -7   71.04    5.77
   5   5  -7   75.12    6.11
   5   5  -7   78.67    6.04
   5   5  -7   78.24    5.70
   5   5  -7   69.77    8.45
   5   5  -7   83.23   11.03
  -5  -5   6  470.01   29.79
   5   5  -6  583.48   31.53
  -5  -5   6  549.89   21.47
   5   5  -6  504.23   20.95
   5  -5  -6  413.47   20.85
   5   5  -6  473.25   20.80
   5   5  -6  490.32   21.40
   5   5  -6  508.56   20.85
   5   5  -6  493.13   20.19
   5  -5  -6  366.02   24.06
   5  -5  -6  502.32   22.19
   5  -5  -5   29.52    5.19
   5  -5  -5   40.18    4.44
   5  -5  -5   39.41    4.83
  -5  -5   5   39.46    7.35
  -5  -5   5   44.32    4.60
   5  -5  -5   34.38    3.67
   5   5  -5   41.84    4.17
   5   5  -5   40.31    3.93
   5   5  -5   35.99    3.63
   5   5  -5   39.01    7.03
  -5  -5   5   46.22    4.29
   5  -5  -4  129.70   11.11
   5  -5  -4  166.83   10.40
  -5  -5   4  171.36   15.13
  -5  -5   4  159.30    9.60
   5   5  -4  161.88    8.74
   5  -5  -4  137.01    7.87
   5   5  -4  173.52    9.02
   5   5  -4  173.93    9.53
   5   5  -4  170.14    9.29
   5   5  -4  162.45    8.99
   5   5  -4  156.16   14.02
  -5  -5   4  158.08    9.09
   5  -5  -3   11.46    2.97
   5  -5  -3    9.06    2.22
  -5  -5   3    8.77    2.05
   5   5  -3    6.27    1.64
   5   5  -3    9.80    1.94
   5   5  -3    6.08    1.72
   5   5  -3    7.90    2.00
   5   5  -3    7.29    1.53
  -5  -5   3   15.18    2.40
   5   5  -3    8.89    3.20
   5  -5  -2  101.32    8.97
   5  -5  -2  110.80    7.99
   5   5  -2  115.94    6.53
  -5  -5   2  102.91    7.23
   5   5  -2  102.56    6.92
  -5  -5   2  118.84    7.60
   5   5  -2  102.55    6.91
   5   5  -2  109.87    7.17
   5   5  -2   97.96    6.45
  -5  -5   2  107.08    6.83
  -5  -5   1   51.24    8.71
  -5  -5   1   52.65    4.61
   5  -5  -1   53.69    6.19
   5  -5  -1   56.98    5.59
   5   5  -1   47.03    4.10
  -5  -5   1   41.41    4.36
   5   5  -1   48.24    4.49
  -5  -5   1   48.57    4.60
   5   5  -1   48.77    4.52
   5   5  -1   44.53    4.19
  -5  -5   1   47.03    4.73
   5  -5   0  234.42   14.78
  -5  -5   0  306.98   13.61
   5  -5   0  264.01   14.30
  -5  -5   0  227.15   12.83
   5   5   0  251.56   12.56
  -5  -5   0  259.34   13.03
  -5  -5   0  257.66   13.30
   5   5   0  283.25   13.04
  -5  -5   0  222.36   13.72
   5   5   0  301.69   20.63
  -5  -5  -1    9.18    2.15
   5  -5   1   11.95    3.05
   5  -5   1    9.13    2.46
  -5  -5  -1   14.40    2.72
   5   5   1    8.03    1.91
  -5  -5  -1    6.58    1.83
   5   5   1    6.95    1.93
  -5   5  -1    9.64    2.77
   5  -5   2  637.44   26.25
   5  -5   2  565.43   25.90
   5   5   2  527.93   23.23
  -5  -5  -2  483.51   23.56
  -5  -5  -2  509.24   24.20
   5   5   2  565.57   23.27
   5   5   2  596.86   31.98
  -5   5  -2  618.38   28.48
  -5  -5  -3    3.73    1.74
  -5  -5  -3    2.96    2.54
   5  -5   3   12.33    2.99
   5  -5   3    8.47    2.43
   5  -5   3    5.46    2.05
   5  -5   3    6.77    1.70
   5  -5   3    8.33    1.82
   5   5   3    6.14    1.78
   5   5   3    8.33    2.00
   5   5   3    4.65    2.69
  -5   5  -3    6.80    2.84
   5  -5   4  784.18   33.54
   5  -5   4  789.67   32.48
  -5  -5  -4  804.55   43.37
  -5  -5  -4  631.95   31.72
   5  -5   4  734.50   29.98
   5  -5   4  752.36   30.54
   5   5   4  836.11   31.68
   5   5   4  803.71   31.21
   5   5   4  917.30   41.59
  -5  -5  -5   43.54    8.65
   5  -5   5   39.82    4.88
   5   5   5   33.57    4.20
  -5  -5  -5   31.60    4.75
   5  -5   5   32.91    3.81
   5  -5   5   40.01    4.30
   5   5   5   34.78    4.12
   5   5   5   38.20    7.09
  -5  -5  -6  474.99   20.88
   5   5   6  486.79   21.39
   5  -5   6  482.04   20.59
  -5  -5  -6  423.02   22.61
   5   5   6  489.04   28.21
   5  -5   6  493.42   21.91
  -5  -5  -7   10.84    3.12
   5  -5   7   15.75    3.12
  -5  -5  -7   10.82    2.38
  -5   5  -7    6.75    3.63
   5   5   7   12.73    2.74
   5  -5   7   10.58    2.50
   5   5   7   10.89    2.47
   5   5   7   15.72    4.48
  -5  -5  -7   11.12    3.20
   5  -5   8  847.94   33.04
  -5  -5  -8  758.06   31.85
   5   5   8  832.59   32.64
   5  -5   8  775.40   31.95
  -5  -5  -8  773.49   34.41
   5   5   8  816.45   31.79
  -5  -5  -8  768.68   34.80
   5   5   8  815.60   38.51
  -5  -5  -9    2.93    1.78
   5  -5   9    3.74    1.73
  -5  -5  -9    3.32    1.58
  -5   5  -9    1.56    2.18
   5   5   9    1.29    1.31
   5  -5   9    4.09    1.66
   5   5   9    0.74    1.18
  -5  -5  -9    2.57    1.73
  -5  -5 -10    1.88    1.28
  -5  -5 -10    2.93    1.60
   5  -5  10    1.67    1.40
   5  -5  10    1.98    1.23
   5   5  10    0.16    1.06
  -5  -5 -10    4.86    1.95
   5  -5  10    3.00    1.38
   5  -5  11  114.74    7.37
  -5  -5 -11  131.51    8.57
   5  -5  11  120.00    7.65
  -5  -5 -11  125.04    7.60
   5   5  11  124.82    6.99
  -5  -5 -11  123.51    7.51
   5   5  12  146.17    7.99
   5  -5  12  145.23    8.08
   5   5  13   15.73    1.92
  -5  -5 -13   22.48    2.45
   5  -6 -15  149.22    7.90
  -5  -6  15  136.89    7.19
   5   6 -14    2.72    0.90
   5  -6 -14    3.73    1.25
   5  -6 -14    3.83    1.78
  -5  -6  14    3.62    1.66
   5   6 -13    1.58    0.92
   5  -6 -13    2.39    1.33
   5   6 -13    1.64    0.79
   5  -6 -13    2.50    1.71
  -5  -6  13    2.33    1.91
   5   6 -12  204.77   10.26
   5   6 -12  211.74   10.63
   5  -6 -12  233.97   13.30
   5   6 -12  219.26   10.62
   5  -6 -12  223.25   13.58
   5   6 -11   90.63    6.14
   5   6 -11   99.84    6.49
  -5  -6  11  112.37    6.75
   5  -6 -11   91.71    8.28
   5   6 -11   86.79    6.19
   5   6 -11   98.81    6.40
  -5  -6  11   95.13    7.43
   5  -6 -11   84.40    8.04
  -5  -6  10    5.33    3.50
  -5  -6  10    3.34    1.67
   5   6 -10    5.04    1.59
   5   6 -10    5.75    1.79
   5  -6 -10    3.37    1.82
  -5  -6  10    5.32    1.53
   5   6 -10    4.78    1.58
   5   6 -10    4.03    1.49
   5   6 -10    4.53    1.66
  -5  -6  10    4.00    1.58
   5   6 -10    6.33    3.21
  -5  -6   9   -0.85    2.06
  -5  -6   9    0.98    1.28
   5   6  -9    0.18    1.07
   5  -6  -9    1.00    1.46
  -5  -6   9    0.82    0.89
   5   6  -9    0.37    0.97
   5   6  -9    0.90    0.97
   5   6  -9    1.30    1.27
   5   6  -9    0.20    1.27
  -5  -6   9    1.96    1.22
   5   6  -9   -0.64    1.99
  -5  -6   8  399.82   19.25
   5   6  -8  417.81   18.16
  -5  -6   8  416.86   17.71
   5  -6  -8  304.42   18.77
   5   6  -8  392.93   17.95
   5   6  -8  400.92   18.15
   5   6  -8  406.24   18.30
  -5  -6   8  414.06   18.29
   5   6  -8  469.44   28.79
   5  -6  -8  347.96   20.09
  -5  -6   8  320.61   26.62
  -5  -6   7   37.28    5.53
   5  -6  -7   58.80    6.64
  -5  -6   7   44.67    8.84
  -5  -6   7   61.68    6.03
   5   6  -7   60.33    5.28
  -5  -6   7   64.89    5.24
   5  -6  -7   44.32    5.26
   5   6  -7   66.70    5.76
   5   6  -7   61.65    5.40
   5   6  -7   61.76    5.38
   5   6  -7   61.81    5.08
   5   6  -7   62.67    8.03
  -5  -6   7   57.91    5.23
   5   6  -7   70.87   10.50
  -5  -6   6   58.57    6.14
   5  -6  -6   76.77    6.88
   5  -6  -6   73.31    7.35
  -5  -6   6   41.49    8.31
  -5  -6   6   72.10    6.42
   5   6  -6   64.73    5.52
  -5  -6   6   62.92    5.24
   5  -6  -6   57.04    5.41
   5   6  -6   64.22    5.57
   5   6  -6   65.48    5.88
   5   6  -6   67.72    5.56
   5   6  -6   65.22    5.10
   5   6  -6   86.19   11.51
   5  -6  -5  185.83   11.41
  -5  -6   5  176.36   11.02
   5   6  -5  171.12   10.12
   5  -6  -5  182.86   12.22
   5   6  -5  170.53   10.14
   5   6  -5  183.40    9.99
   5   6  -5  167.30    9.53
   5   6  -5  200.91   17.56
  -5  -6   5  198.20   10.81
   5   6  -4  596.47   33.67
  -5  -6   4  627.77   25.65
   5   6  -4  590.04   24.25
   5  -6  -4  585.07   27.11
   5   6  -4  616.78   24.65
   5   6  -4  599.03   25.32
   5   6  -4  586.84   24.68
   5   6  -4  581.59   24.91
   5  -6  -4  579.91   26.02
   5  -6  -4  671.64   25.43
  -5  -6   4  572.34   24.62
   5  -6  -4  584.15   32.10
  -5  -6   3  362.47   16.06
   5   6  -3  405.41   25.15
  -5  -6   3  383.62   17.73
   5   6  -3  391.18   17.18
   5  -6  -3  353.05   18.73
   5   6  -3  393.85   17.34
   5   6  -3  379.77   17.47
   5   6  -3  390.42   17.75
   5  -6  -3  382.27   16.89
  -5  -6   3  387.36   17.24
  -5  -6   3  314.58   27.24
   5  -6  -3  329.21   21.63
  -5  -6   2   61.50   11.19
  -5  -6   2   96.99    6.72
   5  -6  -2   75.08    5.80
   5  -6  -2   66.54    8.21
   5  -6  -2   86.65    7.61
  -5  -6   2   71.44    6.35
   5   6  -2   92.99    6.67
   5   6  -2  100.32    6.94
   5   6  -2   93.57    6.17
   5   6  -2   90.97    6.76
   5   6  -2   86.18    6.68
  -5  -6   2   85.25    6.21
   5   6  -2   90.61   10.70
  -5  -6   1   36.17    4.00
   5  -6  -1   26.94    3.21
  -5  -6   1   33.77    4.06
   5  -6  -1   30.40    5.09
  -5  -6   1   26.84    7.52
   5  -6  -1   29.24    4.34
  -5  -6   1   17.94    2.97
   5   6  -1   22.28    3.33
  -5  -6   1   27.65    3.86
   5   6  -1   25.51    3.50
   5   6  -1   22.77    3.11
  -5  -6   1   23.88    3.52
  -5  -6   0   81.80    6.77
  -5  -6   0   91.33    7.04
   5  -6   0   86.10    8.35
  -5  -6   0   75.77   12.38
   5  -6   0   90.79    7.75
  -5  -6   0   78.22    6.82
   5   6   0   73.23    5.81
   5   6   0   72.07    5.95
  -5  -6   0   84.19    7.49
   5  -6   1  346.30   17.25
  -5  -6  -1  276.01   15.09
   5  -6   1  294.71   16.94
  -5  -6  -1  307.72   25.43
  -5  -6  -1  255.02   15.06
   5   6   1  266.52   14.02
   5   6   1  307.99   14.67
  -5  -6  -1  246.09   16.33
   5   6   1  362.86   24.28
  -5   6  -1  301.26   18.56
   5  -6   2   89.08    8.38
   5  -6   2  106.76    8.81
  -5  -6  -2  118.69   15.06
  -5  -6  -2   88.59    7.73
   5   6   2  110.11    7.70
   5   6   2  118.65    7.81
  -5  -6  -2   82.82    9.15
  -5   6  -2  102.27   10.36
  -5  -6  -3   44.21    5.53
   5   6   3   56.25    5.43
   5   6   3   68.92    5.74
  -5  -6  -3   40.40    6.71
   5   6   3   73.23   10.45
  -5  -6  -4   10.63    2.99
   5   6   4   17.95    3.12
   5  -6   4    9.95    2.06
   5   6   4   22.08    3.39
   5   6   4   18.65    5.58
  -5  -6  -4   13.09    4.13
   5  -6   5  119.44    9.27
  -5  -6  -5  112.27    7.88
   5   6   5  116.40    8.30
   5  -6   5  111.99    7.34
  -5  -6  -5  106.79    9.34
   5   6   5  109.84    7.97
  -5  -6  -5   98.68   10.58
   5   6   5  123.69   13.68
   5  -6   6  342.33   17.01
  -5  -6  -6  305.18   14.95
   5   6   6  358.49   16.27
   5  -6   6  282.34   14.14
  -5  -6  -6  294.24   17.38
   5   6   6  341.88   15.67
   5   6   6  358.88   23.42
  -5  -6  -7   40.74    4.43
  -5   6  -7   28.25    6.41
   5   6   7   52.88    5.23
   5  -6   7   39.76    4.22
  -5  -6  -7   42.14    5.66
   5  -6   7   38.00    4.10
   5  -6   7   49.54    5.43
   5   6   7   49.42    8.05
  -5  -6  -8   12.49    2.40
   5  -6   8   12.30    2.34
   5  -6   8   15.08    2.62
   5   6   8   13.78    2.81
  -5  -6  -8   15.04    3.39
  -5  -6  -8    8.88    2.73
   5  -6   8   17.57    3.16
   5   6   9   34.56    3.97
   5   6   9   31.44    3.51
  -5  -6  -9   26.92    4.16
   5  -6   9   25.14    3.29
  -5  -6  -9   33.04    4.43
   5   6  10  248.70   12.08
   5   6  10  216.12   10.97
  -5  -6 -10  230.54   12.07
  -5  -6 -10  246.01   12.83
   5   6  11   17.24    2.40
  -5  -6 -11   23.66    3.04
  -5  -6 -11   22.61    3.08
  -5  -6 -11   21.94    2.47
   5   6  11   15.88    2.06
  -5  -6 -12   25.71    2.65
  -5  -6 -12   26.09    2.76
   5   7 -13   17.57    1.86
   5   7 -13   17.26    1.88
  -5  -7  13   20.79    3.01
   5   7 -12    3.16    0.86
   5   7 -12    1.88    1.00
   5   7 -12    3.44    1.10
  -5  -7  12    1.69    1.80
   5   7 -11   68.12    4.79
   5   7 -11   61.43    4.38
   5   7 -11   70.25    4.83
   5  -7 -11   59.40    6.19
  -5  -7  10   41.90    4.72
   5   7 -10   36.61    3.70
   5   7 -10   32.90    3.34
  -5  -7  10   42.29    3.84
   5   7 -10   31.99    3.50
   5   7 -10   32.22    3.37
   5   7 -10   37.92    3.56
  -5  -7  10   25.59    3.03
  -5  -7  10   46.49    6.73
   5  -7 -10   37.24    5.11
   5  -7  -9   50.80    6.31
  -5  -7   9   71.76    6.61
   5   7  -9   68.32    5.53
   5   7  -9   67.09    5.18
  -5  -7   9   70.39    5.31
   5   7  -9   76.14    5.85
   5   7  -9   70.38    5.33
   5   7  -9   69.77    5.38
   5   7  -9   72.66    5.50
  -5  -7   9   52.47    4.77
  -5  -7   9   62.22    7.57
  -5  -7   9   70.37    5.72
   5  -7  -8    7.20    2.68
  -5  -7   8   12.51    2.87
   5   7  -8   10.50    2.15
   5   7  -8   13.06    2.56
  -5  -7   8   13.72    2.45
   5   7  -8   11.35    2.28
   5   7  -8    9.89    2.30
   5   7  -8   12.29    2.36
  -5  -7   8    9.33    2.03
  -5  -7   8    6.74    2.51
  -5  -7   8   10.52    2.31
   5   7  -8   13.72    4.82
   5  -7  -7    3.90    2.10
  -5  -7   7    5.44    2.04
   5   7  -7    3.39    1.47
  -5  -7   7    4.45    1.62
   5   7  -7    3.33    1.38
   5   7  -7    3.88    1.63
   5   7  -7    4.18    1.57
   5   7  -7    3.98    1.59
   5   7  -7    7.74    3.92
  -5  -7   7    2.51    1.29
  -5  -7   7    1.90    4.58
  -5  -7   7    4.08    1.78
  -5  -7   6   92.68    6.91
   5  -7  -6   87.78    8.59
  -5  -7   6   93.06    7.90
   5   7  -6   96.99    7.00
  -5  -7   6   92.44    6.81
   5   7  -6  105.07    7.36
   5   7  -6   90.96    7.27
   5   7  -6   92.82    6.75
   5   7  -6   92.48    6.26
   5   7  -6   91.23   10.10
   5   7  -6  113.81   13.67
  -5  -7   5  163.90    9.98
   5  -7  -5  175.28   11.40
   5  -7  -5  163.61   12.13
  -5  -7   5  156.37   10.72
   5   7  -5  175.14   10.21
  -5  -7   5  162.44    9.89
   5   7  -5  170.99   10.10
   5   7  -5  173.08    9.68
   5   7  -5  185.96    9.62
   5   7  -5  179.87   17.53
   5  -7  -4    2.42    1.76
  -5  -7   4    3.18    1.39
  -5  -7   4    2.49    3.47
  -5  -7   4    2.49    1.47
   5   7  -4    3.78    1.32
   5  -7  -4    2.00    1.61
   5   7  -4    6.11    1.92
   5   7  -4    3.35    1.40
   5   7  -4    3.79    1.60
   5   7  -4    0.71    1.97
  -5  -7   3    9.35    5.15
   5  -7  -3    0.53    1.28
   5  -7  -3    2.05    1.21
  -5  -7   3    4.08    1.56
  -5  -7   3    1.38    1.11
   5   7  -3    3.70    1.59
   5  -7  -3    1.91    1.78
   5   7  -3    4.43    1.52
   5   7  -3    4.35    1.89
   5   7  -3    3.50    1.52
   5   7  -3    3.69    1.66
   5   7  -3    6.16    3.30
  -5  -7   2   35.52    3.99
   5   7  -2   38.11    7.50
   5   7  -2   48.26    4.78
   5  -7  -2   49.11    5.95
   5   7  -2   44.83    4.66
   5   7  -2   34.71    4.29
   5   7  -2   35.13    4.37
   5  -7  -2   51.12    5.58
  -5  -7   2   43.76    4.81
   5  -7  -2   45.07    4.56
  -5  -7   2   29.05    8.77
  -5  -7   1  438.71   21.21
  -5  -7   1  456.50   21.88
   5   7  -1  473.15   21.32
   5  -7  -1  489.57   23.33
   5   7  -1  473.26   21.38
   5   7  -1  479.33   21.49
   5   7  -1  450.88   20.13
   5  -7  -1  451.15   20.60
  -5  -7   1  404.61   33.89
  -5  -7   0  148.46   10.77
  -5   7   0  148.77   12.95
  -5  -7   0  153.20   10.54
   5   7   0  163.09    9.99
   5   7   0  155.48    9.85
   5   7   0  176.59   10.25
   5   7   0  152.79    9.27
   5  -7   0  165.52   11.31
   5  -7   0  111.00   10.63
  -5  -7   0  127.44   17.66
   5  -7   0  127.91    8.86
  -5  -7  -1    1.13    1.30
  -5  -7  -1    1.01    2.81
   5   7   1    3.30    1.33
   5   7   1    2.46    1.46
  -5  -7  -1    1.89    1.58
   5  -7   1    2.18    1.68
  -5  -7  -2    2.37    1.54
  -5  -7  -2    5.83    3.83
   5   7   2    2.75    1.59
  -5  -7  -2    1.85    2.14
   5   7   2    1.59    1.14
  -5  -7  -3  482.55   24.41
  -5  -7  -3  574.64   36.80
   5   7   3  503.76   22.34
   5   7   3  596.72   23.39
  -5  -7  -4  334.55   26.70
  -5  -7  -4  276.39   17.04
   5   7   4  320.60   15.48
   5   7   4  339.37   15.83
   5   7   4  337.67   24.13
  -5  -7  -5    2.77    1.93
  -5  -7  -5    5.64    2.85
   5   7   5    2.97    1.62
   5   7   5    4.73    1.72
  -5  -7  -5    1.99    2.20
   5   7   5    0.67    2.62
  -5  -7  -6   33.78    5.24
  -5  -7  -6   31.43    5.88
   5   7   6   38.84    4.37
   5   7   6   45.16    4.59
   5   7   6   25.05    6.12
  -5  -7  -6   27.01    5.46
   5   7   7  625.03   26.37
  -5  -7  -7  718.82   32.54
  -5  -7  -7  629.47   28.93
   5   7   7  633.19   26.64
  -5  -7  -8    2.30    1.47
   5   7   8    4.96    1.72
  -5  -7  -8    5.23    2.41
   5   7   8    4.34    1.35
  -5  -7  -8    2.37    1.56
   5   7   9   23.39    3.03
   5   7   9   24.78    2.79
  -5  -7  -9   21.80    3.23
  -5  -7  -9   32.00    4.18
   5   7   9   21.72    2.35
  -5  -7  -9   27.96    3.51
  -5  -7 -10    4.49    1.42
   5   7  10    6.25    1.52
   5   7  10    5.94    1.24
   5   7  10    6.00    1.37
   5   7  10    5.34    1.30
  -5  -7 -10    4.98    1.31
  -5  -7 -10    4.30    1.52
   5   7  11   58.22    3.91
   5  -8 -12    3.56    1.41
   5   8 -11   16.42    1.93
   5  -8 -11   14.96    2.92
   5   8 -11   15.81    1.92
   5   8 -10   45.82    3.55
   5   8 -10   45.85    3.68
   5  -8 -10   39.11    4.95
   5   8 -10   37.40    3.07
   5   8 -10   49.05    3.79
   5   8  -9  152.62    8.24
   5   8  -9  142.41    7.56
  -5  -8   9  172.30    8.60
   5   8  -9  157.49    8.37
   5   8  -9  154.33    8.06
   5   8  -9  150.71    7.99
  -5  -8   9  125.45    7.45
   5  -8  -9  111.68    9.45
  -5  -8   8    0.60    0.79
   5   8  -8    0.84    0.89
   5   8  -8    0.17    1.02
  -5  -8   8    0.78    0.98
   5   8  -8    0.60    0.93
   5   8  -8    0.47    1.00
   5   8  -8    0.32    1.00
   5   8  -8    1.20    1.12
   5  -8  -8    0.32    1.32
  -5  -8   7  328.17   15.69
   5   8  -7  341.05   15.07
  -5  -8   7  340.40   15.35
   5   8  -7  338.33   15.25
   5   8  -7  319.34   15.26
   5   8  -7  363.55   15.91
  -5  -8   7  295.99   14.77
  -5  -8   6   37.14    4.34
   5   8  -6   41.09    4.21
  -5  -8   6   33.93    3.96
   5   8  -6   38.41    4.22
   5   8  -6   45.34    4.69
   5   8  -6   41.33    4.39
   5   8  -6   39.97    3.96
  -5  -8   6   36.92    4.08
   5  -8  -6   24.62    4.70
   5  -8  -5    1.44    1.42
  -5  -8   5    2.48    1.47
   5   8  -5    0.73    1.76
   5   8  -5    0.97    1.21
  -5  -8   5    1.24    1.12
   5   8  -5    4.00    1.64
   5   8  -5    2.28    1.44
   5   8  -5    1.58    1.33
   5   8  -5    1.59    1.07
   5  -8  -5    1.68    1.61
  -5  -8   5    2.06    1.44
   5  -8  -4    5.29    2.26
  -5  -8   4    4.80    1.99
   5   8  -4    8.86    4.12
   5   8  -4    7.23    2.07
  -5  -8   4    6.93    2.08
   5   8  -4   10.59    2.49
   5   8  -4    6.45    1.70
   5   8  -4    6.53    1.92
   5  -8  -4    8.20    2.59
  -5  -8   4    7.04    2.07
   5  -8  -3  175.62   12.61
   5   8  -3  178.97    9.86
   5   8  -3  192.00   18.22
  -5  -8   3  186.65   11.40
   5   8  -3  193.88   11.22
   5   8  -3  189.84   10.59
   5   8  -3  191.03   10.82
   5  -8  -3  162.08   11.49
  -5  -8   3  198.73   11.39
   5  -8  -2   48.10    6.23
  -5  -8   2   53.34    4.91
   5   8  -2   70.51   10.62
  -5  -8   2   63.33    6.21
   5   8  -2   66.69    6.05
   5   8  -2   67.46    5.61
   5   8  -2   63.11    5.39
   5   8  -2   58.43    5.49
   5   8  -2   66.07    5.88
   5  -8  -2   52.26    5.99
  -5  -8   2   67.66    6.31
   5  -8  -2   54.53    5.53
  -5  -8   2   54.91   12.32
  -5  -8   1   45.91    4.97
   5   8  -1   51.67    8.76
  -5  -8   1   52.89    5.97
   5   8  -1   48.55    4.89
   5   8  -1   45.94    4.77
   5   8  -1   46.68    5.00
   5   8  -1   49.63    5.05
   5  -8  -1   48.33    5.59
   5  -8  -1   54.26    6.36
   5  -8  -1   50.88    5.15
  -5  -8   1   26.65    8.38
  -5  -8   0   43.85    5.41
   5   8   0   46.97    8.22
  -5  -8   0   52.46    6.15
   5   8   0   42.22    4.66
   5   8   0   44.03    4.68
   5   8   0   44.97    4.83
   5   8   0   48.63    4.97
   5   8   0   37.38    4.00
   5  -8   0   34.79    4.86
   5  -8   0   41.35    4.74
   5  -8   0   45.45    5.77
  -5  -8   0   40.08    9.87
  -5  -8  -1  184.82   13.90
  -5  -8  -1  230.80   14.85
   5   8   1  198.79   11.73
   5   8   1  229.48   12.19
   5   8   1  241.05   12.42
   5   8   1  221.81   11.48
   5  -8   1  184.98   11.60
  -5  -8  -1  185.25   21.28
  -5  -8  -2    2.98    2.37
  -5  -8  -2    2.86    2.30
   5   8   2    4.24    1.82
   5   8   2    4.30    1.72
   5   8   2    5.23    1.69
   5   8   2    4.61    1.80
   5  -8   2    2.32    1.41
  -5  -8  -3   16.35    4.45
  -5  -8  -3    7.57    3.62
   5   8   3    9.50    2.30
  -5  -8  -3   14.33    4.02
   5   8   3    8.57    2.10
   5   8   3    7.91    2.00
   5  -8   3    7.14    2.05
  -5  -8  -3   12.13    3.16
  -5  -8  -4    6.50    2.61
   5   8   4    5.36    1.89
   5   8   4    7.28    1.72
  -5  -8  -4    8.14    3.47
   5   8   4    5.04    1.65
  -5  -8  -4    2.91    2.57
  -5  -8  -4    5.34    3.07
  -5  -8  -5  267.50   15.46
   5   8   5  241.45   12.24
   5   8   5  199.26   11.09
  -5  -8  -5  290.19   18.78
   5   8   5  245.69   12.24
  -5  -8  -5  234.37   16.70
  -5  -8  -5  210.00   17.35
  -5  -8  -6    1.47    1.53
   5   8   6    0.44    0.96
   5   8   6    2.57    1.35
  -5  -8  -6    1.27    2.04
  -5  -8  -6    1.78    1.71
   5   8   6    0.84    1.15
   5   8   6    1.57    1.12
  -5  -8  -6    0.43    1.90
   5   8   7   45.79    4.02
  -5  -8  -7   45.66    5.94
   5   8   7   46.14    4.15
   5   8   7   50.35    4.06
   5   8   7   51.69    4.35
  -5  -8  -7   44.06    5.06
  -5  -8  -8    1.09    1.13
   5   8   8    2.91    1.10
   5   8   8    3.65    1.24
  -5  -8  -8    1.11    1.39
   5   8   8    0.91    0.83
   5   8   8    0.76    0.93
   5   8   8    1.42    0.88
  -5  -8  -8    1.59    1.23
  -5  -8  -9  124.42    6.62
   5   8   9  111.39    5.96
  -5  -8  -9  115.45    6.95
   5   8   9  117.02    6.19
   5   8   9  113.98    6.13
  -5  -8  -9  119.67    6.80
   5   9  -9  140.01    6.69
   5   9  -9  128.48    6.32
   5   9  -9  130.97    6.60
   5   9  -8   21.34    2.52
   5   9  -8   16.49    2.11
   5   9  -8   21.12    2.39
  -5  -9   8   23.87    2.78
   5   9  -8   20.65    2.46
   5   9  -7   35.63    3.52
   5   9  -7   32.59    3.00
  -5  -9   7   50.16    4.14
   5   9  -7   36.03    3.33
   5   9  -7   32.38    3.29
   5   9  -7   36.81    3.53
   5   9  -7   36.51    3.65
  -5  -9   7   45.98    4.30
  -5  -9   7   35.32    3.42
   5   9  -6    0.75    0.84
  -5  -9   6    1.82    1.11
   5   9  -6    0.29    0.83
   5   9  -6    0.15    0.82
   5   9  -6    1.59    1.09
  -5  -9   6    2.68    1.41
  -5  -9   6    0.63    0.90
   5   9  -5  173.14    9.46
  -5  -9   5  188.79   10.52
   5   9  -5  184.29    9.95
   5   9  -5  191.66   10.42
   5   9  -5  174.06    9.88
   5   9  -5  179.50    9.41
  -5  -9   5  207.71   11.38
  -5  -9   5  204.04   10.61
   5   9  -4    6.95    1.86
   5   9  -4    6.39    1.76
   5   9  -4    3.86    1.62
   5   9  -4    4.92    1.54
   5   9  -4    5.24    1.39
  -5  -9   4    5.23    1.97
  -5  -9   3   84.06    7.17
   5   9  -3   60.47    5.12
   5   9  -3   64.78    5.45
   5   9  -3   67.41    5.17
   5   9  -3   60.09    4.73
   5  -9  -3   80.13    7.11
  -5  -9   2    2.90    1.85
  -5  -9   2    0.85    1.31
   5   9  -2    2.24    1.45
   5   9  -2    1.72    1.16
   5   9  -2    2.72    1.32
   5  -9  -2    0.28    1.33
  -5  -9   1   88.16    8.03
  -5  -9   1   93.05    8.02
   5   9  -1   64.44    4.99
  -5  -9   1   76.92    7.68
   5   9  -1   64.83    4.99
   5   9  -1   70.63    5.79
   5   9  -1   70.05    5.47
   5   9  -1   70.80    5.60
   5  -9  -1   66.43    6.69
  -5  -9   0   19.18    4.07
  -5  -9   0   18.45    3.41
   5   9   0   16.22    2.45
  -5  -9   0   14.67    3.73
   5   9   0   10.70    2.07
   5   9   0   13.36    2.56
   5   9   0   12.15    2.36
   5   9   0   19.81    2.94
   5  -9   0    9.35    2.75
  -5  -9  -1    5.40    2.90
  -5  -9  -1    7.58    2.85
   5   9   1    5.78    1.57
   5   9   1    7.85    1.84
   5   9   1    7.35    2.08
   5   9   1    7.63    1.91
   5  -9   1    3.53    1.96
  -5  -9  -2   18.15    4.62
  -5  -9  -2   20.93    5.01
   5   9   2    9.30    1.95
   5   9   2   11.08    2.09
   5   9   2   12.06    2.32
   5   9   2   13.32    2.38
   5   9   2    9.38    1.70
   5  -9   2    8.54    2.41
   5   9   3   32.55    3.48
   5   9   3   32.12    3.48
   5   9   3   38.48    3.82
   5   9   3   35.68    3.35
   5   9   3   35.74    3.72
  -5  -9  -3   45.78    7.68
  -5  -9  -3   50.16    7.56
   5   9   4   17.78    2.53
   5   9   4   18.44    2.54
   5   9   4   15.99    2.19
   5   9   4   23.61    2.89
  -5  -9  -4   22.99    5.35
  -5  -9  -5   53.95    6.74
   5   9   5   48.94    3.89
   5   9   5   50.13    4.02
   5   9   5   40.33    3.47
   5   9   5   47.13    3.88
  -5  -9  -6    6.98    2.21
   5   9   6    7.46    1.54
   5   9   6    4.89    1.36
   5   9   6    7.70    1.55
   5   9   6    6.66    1.36
   5  -9   6    6.47    1.56
   5   9   6    5.07    1.36
   5   9   7   18.68    2.10
   5  -9   7   22.78    2.39
   5   9   7   18.29    2.07
   5  -9   8    0.84    0.58
   5  10  -5    1.49    0.69
   5  10  -5    1.06    0.80
   5  10  -5    1.78    0.75
   5  10  -5    1.37    0.83
   5  10  -4    1.98    0.94
   5  10  -4    1.86    0.86
   5  10  -4    1.95    0.88
  -5 -10   4    3.01    1.67
   5  10  -3   85.04    5.23
   5  10  -3   89.23    5.38
   5  10  -3   81.28    4.90
   5  10  -3   73.30    4.63
   5  10  -2   49.91    3.74
   5  10  -2   45.60    3.50
   5  10  -2   39.21    3.04
   5  10  -2   36.68    3.11
   5  10  -1   13.19    1.82
   5  10  -1   17.29    2.21
   5  10  -1   19.00    2.26
   5  10  -1   13.01    1.76
   5 -10  -1   12.48    2.83
   5  10   0   18.56    2.19
   5  10   0   26.82    2.70
   5  10   0   22.13    2.25
   5  10   0   26.99    2.58
   5 -10   0   20.60    3.42
   5  10   1   68.54    4.47
   5  10   1   58.63    4.11
   5  10   1   55.29    3.92
   5 -10   1   59.39    5.48
   5  10   2   40.77    3.23
   5  10   2   44.85    3.42
   5 -10   2   46.58    4.48
   5  10   2   48.28    3.56
   5 -10   3    5.37    1.65
   5  10   3    7.15    1.33
   5  10   3    8.00    1.36
  -6   0  17   -0.14    0.89
   6   0 -16  438.32   19.01
  -6   0  16  468.94   20.25
   6   0 -16  483.63   19.44
   6   0 -15    1.12    1.13
   6   0 -15    2.26    1.44
  -6   0  15   -0.44    1.33
   6   0 -14  203.44   11.64
  -6   0  14  196.54   18.20
  -6   0  14  201.46   11.98
   6   0 -14  227.51   12.27
   6   0 -14  223.06   12.10
   6   0 -13   -1.04    2.88
   6   0 -13    3.13    1.70
  -6   0  13   -0.71    2.22
  -6   0  13   -0.24    1.27
   6   0 -13    1.82    1.41
   6   0 -13    0.72    1.16
   6   0 -13    0.69    1.41
   6   0 -13    0.74    2.06
  -6   0  12   22.37    5.90
   6   0 -12   31.33    4.05
  -6   0  12   25.97    3.27
   6   0 -12   24.91    3.78
   6   0 -12   26.99    3.81
   6   0 -12   27.73    6.87
   6   0 -12   19.04    6.60
   6   0 -11    1.89    2.95
   6   0 -11    1.07    1.40
  -6   0  11    0.50    0.96
   6   0 -11    1.25    1.23
   6   0 -11    2.51    1.57
   6   0 -11    2.82    1.41
   6   0 -11    4.70    3.37
   6   0 -10  389.68   31.29
   6   0 -10  597.27   22.94
  -6   0  10  464.62   29.07
  -6   0  10  473.17   20.97
   6   0 -10  528.16   22.02
   6   0 -10  501.68   22.27
   6   0 -10  510.71   21.99
   6   0 -10  582.22   31.25
   6   0  -9    1.96    1.29
  -6   0   9    2.73    2.28
   6   0  -9    2.49    2.30
   6   0  -9    1.34    1.10
   6   0  -9    1.15    1.28
   6   0  -9    3.08    1.45
   6   0  -9    0.96    0.97
   6   0  -9    3.94    3.10
   6   0  -8    9.83    3.92
   6   0  -8    9.92    2.00
   6   0  -8   13.57    2.43
  -6   0   8    9.80    3.50
  -6   0   8    8.81    1.77
   6   0  -8    6.29    1.53
   6   0  -8   10.72    2.15
   6   0  -8   11.85    3.48
   6   0  -7    3.71    2.98
  -6   0   7    3.99    1.17
   6   0  -7    3.43    1.28
  -6   0   7    0.44    1.23
   6   0  -7    0.82    0.89
   6   0  -7    2.38    1.19
   6   0  -7    1.29    1.01
   6   0  -7    1.32    1.03
   6   0  -7    0.11    0.63
   6   0  -7    0.88    0.87
   6   0  -7   -0.33    1.13
   6   0  -6  936.07   45.91
  -6   0   6 1016.15   36.30
   6   0  -6  978.87   37.08
   6   0  -6  984.18   36.97
   6   0  -6  929.24   35.92
  -6   0   6 1043.11   43.02
   6   0  -6 1060.82   37.40
   6   0  -6 1081.83   37.11
   6   0  -6  936.88   37.02
   6   0  -6  865.21   39.08
   6   0  -5    3.96    2.48
   6   0  -5    1.88    0.95
   6   0  -5    0.27    0.82
   6   0  -5    0.74    0.90
  -6   0   5    0.34    0.82
   6   0  -5    0.83    0.86
   6   0  -5    1.30    1.91
   6   0  -5    1.25    0.93
   6   0  -5    1.06    0.90
   6   0  -5    0.97    0.88
   6   0  -4  132.97    7.23
   6   0  -4  137.11    7.35
   6   0  -4  131.37    7.20
  -6   0   4  138.84   10.26
   6   0  -4  105.09    7.06
   6   0  -4  123.00   11.60
   6   0  -3    1.95    0.93
   6   0  -3    0.75    0.78
  -6   0   3   -0.29    0.91
   6   0  -3   -0.40    1.58
   6   0  -2 1952.33   70.83
   6   0  -2 2127.30   76.87
   6   0  -2 2162.43   70.89
   6   0  -1    0.50    0.79
   6   0  -1    0.35    1.53
   6   0  -1    3.59    1.70
   6   0  -1    2.15    0.83
   6   0   0  342.09   15.12
   6   0   0  412.37   19.70
   6   0   0  311.12   14.72
   6   0   0  357.84   19.99
   6   0   0  375.20   15.24
  -6   0  -1    1.22    1.17
   6   0   1    0.27    0.65
   6   0   1    0.82    1.01
   6   0   1    0.26    0.67
   6   0   1    2.39    1.75
   6   0   1    1.57    0.99
  -6   0  -2 3869.56  139.91
   6   0   2 3799.64  136.20
   6   0   2 3885.08  136.08
   6   0   2 3695.85  144.58
   6   0   2 3832.23  136.74
  -6   0  -3    1.17    1.08
   6   0   3    3.43    1.29
   6   0   3    0.83    1.03
   6   0   3    1.62    0.92
   6   0   3    1.91    1.22
   6   0   3    0.12    0.61
   6   0   3    0.48    1.88
  -6   0  -4 1885.20   69.12
  -6   0  -4 1827.19   74.14
   6   0   4 1787.57   64.84
   6   0   4 1715.91   63.62
   6   0   4 1829.07   63.39
   6   0   4 1760.34   73.57
   6   0   4 1824.95   64.86
   6   0   5    0.13    0.68
   6   0   5    1.64    1.71
   6   0   5    1.88    1.20
   6   0   5    1.54    0.96
   6   0   6  361.02   15.04
  -6   0  -6  322.06   16.02
  -6   0  -6  341.59   23.96
   6   0   6  364.68   16.78
   6   0   6  329.07   15.13
  -6   0  -7    2.34    1.42
  -6   0  -7    0.71    1.72
   6   0   7    1.80    1.40
   6   0   7    1.40    0.97
  -6   0  -8  249.92   13.70
   6   0   8  253.55   14.03
   6   0   8  256.14   12.44
  -6   0  -9   -0.24    1.12
   6   0   9    1.53    1.55
   6   0   9    4.46    1.45
  -6   0 -10   52.56    5.51
   6   0  10   57.52    9.75
   6   0  10   46.16    4.18
   6   0  10   58.58    5.83
   6   0  11    2.65    1.66
  -6   0 -11   -0.28    1.77
  -6   0 -11    1.15    1.43
   6   0  11    1.44    2.65
   6   0  11    0.49    1.26
   6   0  12   25.46    3.35
  -6   0 -12   17.86    3.49
  -6   0 -12   22.49    3.38
   6   0  12   24.27    3.59
   6   0  13    2.17    1.31
  -6   0 -13    0.64    1.30
   6   0  13    1.77    1.35
   6   0  14    4.36    1.25
  -6   0 -14    5.44    1.74
  -6   0 -15    0.21    0.74
  -6  -1  17    5.82    1.47
  -6   1  17    3.52    1.25
   6   1 -16   71.73    5.09
   6   1 -16   73.48    5.22
  -6  -1  16   72.73    5.71
  -6   1  16   71.87    5.73
   6   1 -15  236.70   12.07
   6  -1 -15  234.42   12.42
  -6   1  15  239.62   12.95
  -6  -1  15  231.60   12.73
   6   1 -15  256.32   12.36
   6   1 -15  227.28   11.89
   6  -1 -14   78.31   13.18
   6   1 -14   71.80   12.90
  -6  -1  14   70.82    6.50
  -6   1  14   78.95    6.82
   6   1 -14   84.09    6.49
   6   1 -14   91.63    6.61
  -6   1  14   77.87   11.24
  -6  -1  14   81.72   11.26
   6  -1 -14   93.08    7.29
   6   1 -14   94.20    6.82
   6   1 -14   88.12    6.68
   6  -1 -14   89.13    7.11
   6   1 -14   94.89   11.86
   6  -1 -13    4.03    3.45
   6   1 -13    9.28    4.98
  -6   1  13    8.01    2.36
  -6  -1  13    7.15    2.30
  -6  -1  13    9.41    2.24
   6   1 -13   11.87    2.54
  -6   1  13    8.55    4.22
  -6  -1  13   11.89    4.47
   6  -1 -13    7.06    2.08
   6   1 -13   15.21    2.82
   6  -1 -13    7.66    2.57
   6   1 -13   11.03    2.37
   6   1 -13    8.76    2.25
   6  -1 -13   11.49    2.75
   6   1 -13    8.81    4.01
   6  -1 -12  213.44   22.73
   6   1 -12  230.61   23.76
  -6  -1  12  267.06   13.85
   6   1 -12  281.72   14.39
   6   1 -12  318.52   14.71
  -6   1  12  291.65   22.37
  -6  -1  12  255.47   21.11
[truncated: 369,935 more chars]
