# Supplementary material for: Halogen Bonding in Sulphonamide Co-Crystals: X···π Preferred over X···O/N?
Source: Molecules. 2023 Aug 6;28(15):5910. doi: 10.3390/molecules28155910 (PMC10420850; doi:10.3390/molecules28155910)
Supplement: Supplementary file 1 [file molecules-28-05910-s001.zip › 6-SM014-CPA_14DBTFB.cif]

data_th_sm14_autored
_audit_creation_date               2022-02-07
_audit_creation_method
;
Olex2 1.3
(compiled 2020.11.12 svn.r5f609507 for OlexSys, GUI svn.r6408)
;
_shelx_SHELXL_version_number       '2017/1'
_audit_contact_author_address      ?
_audit_contact_author_email        ?
_audit_contact_author_name         ''
_audit_contact_author_phone        ?
_publ_contact_author_id_orcid      ?
_publ_section_references
;
Bourhis, L.J., Dolomanov, O.V., Gildea, R.J., Howard, J.A.K., Puschmann, H.
 (2015). Acta Cryst. A71, 59-75.

Dolomanov, O.V., Bourhis, L.J., Gildea, R.J, Howard, J.A.K. & Puschmann, H.
 (2009), J. Appl. Cryst. 42, 339-341.

Sheldrick, G.M. (2008). Acta Cryst. A64, 112-122.
;
_chemical_name_common              ?
_chemical_name_systematic          ?
_chemical_formula_moiety           'C10 H13 Cl N2 O3 S, Br C3 F2'
_chemical_formula_sum              'C13 H13 Br Cl F2 N2 O3 S'
_chemical_formula_weight           430.67
_chemical_melting_point            ?
loop_
  _atom_type_symbol
  _atom_type_description
  _atom_type_scat_dispersion_real
  _atom_type_scat_dispersion_imag
  _atom_type_scat_source
 'C' 'C' 0.0033 0.0016 'International Tables Vol C Tables 4.2.6.8 and 6.1.1.4'
 'H' 'H' 0.0000 0.0000 'International Tables Vol C Tables 4.2.6.8 and 6.1.1.4'
 'Br' 'Br' -0.2901 2.4595
 'International Tables Vol C Tables 4.2.6.8 and 6.1.1.4'
 'Cl' 'Cl' 0.1484 0.1585 'International Tables Vol C Tables 4.2.6.8 and 6.1.1.4'
 'F' 'F' 0.0171 0.0103 'International Tables Vol C Tables 4.2.6.8 and 6.1.1.4'
 'N' 'N' 0.0061 0.0033 'International Tables Vol C Tables 4.2.6.8 and 6.1.1.4'
 'O' 'O' 0.0106 0.0060 'International Tables Vol C Tables 4.2.6.8 and 6.1.1.4'
 'S' 'S' 0.1246 0.1234 'International Tables Vol C Tables 4.2.6.8 and 6.1.1.4'

_shelx_space_group_comment
;
The symmetry employed for this shelxl refinement is uniquely defined
by the following loop, which should always be used as a source of
symmetry information in preference to the above space-group names.
They are only intended as comments.
;
_space_group_crystal_system        'monoclinic'
_space_group_IT_number             14
_space_group_name_H-M_alt          'P 1 21/n 1'
_space_group_name_Hall             '-P 2yn'
loop_
  _space_group_symop_operation_xyz
 'x, y, z'
 '-x+1/2, y+1/2, -z+1/2'
 '-x, -y, -z'
 'x-1/2, -y-1/2, z-1/2'

_cell_length_a                     13.1627(2)
_cell_length_b                     8.95812(18)
_cell_length_c                     14.5445(3)
_cell_angle_alpha                  90
_cell_angle_beta                   105.584(2)
_cell_angle_gamma                  90
_cell_volume                       1651.94(6)
_cell_formula_units_Z              4
_cell_measurement_reflns_used      19836
_cell_measurement_temperature      100.00(11)
_cell_measurement_theta_max        30.6740
_cell_measurement_theta_min        2.5240
_shelx_estimated_absorpt_T_max     0.153
_shelx_estimated_absorpt_T_min     0.036
_exptl_absorpt_coefficient_mu      2.811
_exptl_absorpt_correction_T_max    0.12734
_exptl_absorpt_correction_T_min    0.10546
_exptl_absorpt_correction_type     sphere
_exptl_absorpt_process_details
;
CrysAlisPro 1.171.41.92a (Rigaku Oxford Diffraction, 2020)
Spherical absorption correction
using equivalent radius and absorption coefficient.
Empirical absorption correction using spherical harmonics,
implemented in SCALE3 ABSPACK scaling algorithm.
;
_exptl_absorpt_special_details     ?
_exptl_crystal_colour              'clear colourless'
_exptl_crystal_colour_lustre       clear
_exptl_crystal_colour_primary      colourless
_exptl_crystal_density_diffrn      1.732
_exptl_crystal_density_meas        ?
_exptl_crystal_density_method      ?
_exptl_crystal_description         block
_exptl_crystal_F_000               860
loop_
  _exptl_crystal_face_index_h
  _exptl_crystal_face_index_k
  _exptl_crystal_face_index_l
  _exptl_crystal_face_perp_dist
 -2 -3 5 0.3822
 -2 5 -1 0.3698
 5 0 3 0.8198
 3 0 -5 0.6200
 2 -5 -3 0.4797
 1 -1 -5 0.5970
 0 0 1 0.8059

_exptl_crystal_size_max            0.4
_exptl_crystal_size_mid            0.1
_exptl_crystal_size_min            0.1
_exptl_crystal_size_rad            0.736
_exptl_transmission_factor_max     ?
_exptl_transmission_factor_min     ?
_diffrn_reflns_av_R_equivalents    0.0345
_diffrn_reflns_av_unetI/netI       0.0128
_diffrn_reflns_Laue_measured_fraction_full  1.000
_diffrn_reflns_Laue_measured_fraction_max  1.000
_diffrn_reflns_limit_h_max         16
_diffrn_reflns_limit_h_min         -16
_diffrn_reflns_limit_k_max         11
_diffrn_reflns_limit_k_min         -11
_diffrn_reflns_limit_l_max         18
_diffrn_reflns_limit_l_min         -18
_diffrn_reflns_number              44260
_diffrn_reflns_point_group_measured_fraction_full  1.000
_diffrn_reflns_point_group_measured_fraction_max  1.000
_diffrn_reflns_theta_full          25.242
_diffrn_reflns_theta_max           26.371
_diffrn_reflns_theta_min           2.439
_diffrn_ambient_temperature        100.15
_diffrn_detector_area_resol_mean   10.0000
_diffrn_detector_type              HyPix
_diffrn_measured_fraction_theta_full  1.000
_diffrn_measured_fraction_theta_max  1.000
_diffrn_measurement_details
;
List of Runs (angles in degrees, time in seconds):

  # Type    Start    End  Width  t~exp~   \w     \q     \k     \f   Frames
--------------------------------------------------------------------------
  1  \w    -13.00  70.00   0.50   13.49    --   -2.10  62.00-131.00  166
  2  \w    -69.00 -29.00   0.50   13.49    --   -2.10 -62.00  90.00   80
  3  \w     26.00  52.00   0.50   13.49    --    4.60  62.00-131.00   52
  4  \w    -29.00  18.00   0.50   13.49    --    4.60 -62.00  90.00   94
  5  \w    -58.00  46.00   0.50   13.49    --   -2.10   0.00 120.00  208
  6  \w    -23.00  26.00   0.50   13.49    --   -2.10 -99.00 150.00   98
  7  \w     -8.00  61.00   0.50   13.49    --   -2.10  12.00 171.02  138
  8  \w    -23.00  27.00   0.50   13.49    --   -2.10 -99.00-120.00  100
  9  \w    -66.00  53.00   0.50   13.49    --    4.60   0.00 -90.00  238
 10  \w    -12.00  34.00   0.50   13.49    --    4.60 -99.00 -60.00   92
 11  \w    -69.00  -4.00   0.50   13.49    --    4.60 -19.00-120.00  130
 12  \w    -23.00  29.00   0.50   13.49    --    4.60 -99.00-180.00  104
 13  \w    -53.00  15.00   0.50   13.49    --    6.00 -36.00  36.84  136
;
_diffrn_measurement_device         'four-circle diffractometer'
_diffrn_measurement_device_type    'XtaLAB Synergy, Dualflex, HyPix'
_diffrn_measurement_method         '\w scans'
_diffrn_radiation_type             MoK\a
_diffrn_radiation_wavelength       0.71073
_diffrn_source                     ?
_reflns_Friedel_coverage           0.000
_reflns_Friedel_fraction_full      .
_reflns_Friedel_fraction_max       .
_reflns_number_gt                  3247
_reflns_number_total               3378
_reflns_special_details
;
 Reflections were merged by SHELXL according to the crystal
 class for the calculation of statistics and refinement.
 
 _reflns_Friedel_fraction is defined as the number of unique
 Friedel pairs measured divided by the number that would be
 possible theoretically, ignoring centric projections and
 systematic absences.
;
_reflns_threshold_expression       'I > 2\s(I)'
_computing_cell_refinement         'CrysAlisPro 1.171.41.92a (Rigaku OD, 2020)'
_computing_data_collection         'CrysAlisPro 1.171.41.92a (Rigaku OD, 2020)'
_computing_data_reduction          'CrysAlisPro 1.171.41.92a (Rigaku OD, 2020)'
_computing_molecular_graphics      'Olex2 1.3 (Dolomanov et al., 2009)'
_computing_publication_material    'Olex2 1.3 (Dolomanov et al., 2009)'
_computing_structure_refinement    'XL  (Sheldrick, 2008)'
_computing_structure_solution      'olex2.solve 1.3 (Bourhis et al., 2015)'
_refine_diff_density_max           0.456
_refine_diff_density_min           -0.367
_refine_diff_density_rms           0.055
_refine_ls_extinction_coef         .
_refine_ls_extinction_method       none
_refine_ls_goodness_of_fit_ref     1.171
_refine_ls_hydrogen_treatment      refall
_refine_ls_matrix_type             full
_refine_ls_number_parameters       270
_refine_ls_number_reflns           3378
_refine_ls_number_restraints       33
_refine_ls_R_factor_all            0.0363
_refine_ls_R_factor_gt             0.0340
_refine_ls_restrained_S_all        1.168
_refine_ls_shift/su_max            0.001
_refine_ls_shift/su_mean           0.000
_refine_ls_structure_factor_coef   Fsqd
_refine_ls_weighting_details      
 'w=1/[\s^2^(Fo^2^)+(0.0230P)^2^+1.9094P] where P=(Fo^2^+2Fc^2^)/3'
_refine_ls_weighting_scheme        calc
_refine_ls_wR_factor_gt            0.0711
_refine_ls_wR_factor_ref           0.0721
_refine_special_details            ?
_olex2_refinement_description
;
1. Restrained distances
 C11A-C6A
 2.4 with sigma of 0.04
 C11A-C10A \\sim C10A-C6A
 with sigma of 0.02
 C11A-F4A \\sim C6A-F3A
 with sigma of 0.02
2. Uiso/Uaniso restraints and constraints
F4A \\sim C11A \\sim C10A \\sim Br1A \\sim C6A \\sim F3A: within 2A with sigma
of 0.01 and sigma for terminal atoms of 0.02 within 2A
Br1: within 2A with sigma of 0.04 and sigma for terminal atoms of 0.08 within 2A
3. Others
 Sof(Br1A)=1-FVAR(1)
 Sof(Br1)=FVAR(1)
;
_atom_sites_solution_hydrogens     difmap
_atom_sites_solution_primary       iterative
_atom_sites_solution_secondary     ?
loop_
  _atom_site_label
  _atom_site_type_symbol
  _atom_site_fract_x
  _atom_site_fract_y
  _atom_site_fract_z
  _atom_site_U_iso_or_equiv
  _atom_site_adp_type
  _atom_site_occupancy
  _atom_site_site_symmetry_order
  _atom_site_calc_flag
  _atom_site_refinement_flags_posn
  _atom_site_refinement_flags_adp
  _atom_site_refinement_flags_occupancy
  _atom_site_disorder_assembly
  _atom_site_disorder_group
 S1 S 0.29430(4) 0.46908(5) 0.59040(3) 0.01679(11) Uani 1 1 d . . . . .
 Cl2 Cl 0.78609(4) 0.50511(8) 0.69667(4) 0.03440(16) Uani 1 1 d . . . . .
 C C 0.43347(16) 0.4798(2) 0.62318(14) 0.0175(4) Uani 1 1 d . . . . .
 O2 O 0.28767(12) 0.62510(16) 0.77166(10) 0.0216(3) Uani 1 1 d . . . . .
 C2 C 0.48497(18) 0.5970(3) 0.67941(16) 0.0229(4) Uani 1 1 d . . . . .
 C3 C 0.48962(17) 0.3708(2) 0.58937(16) 0.0222(4) Uani 1 1 d . . . . .
 N4 N 0.25516(14) 0.4080(2) 0.84009(13) 0.0198(4) Uani 1 1 d . . . . .
 N5 N 0.26083(14) 0.4083(2) 0.68453(13) 0.0184(4) Uani 1 1 d . . . . .
 C1 C 0.59897(18) 0.3792(3) 0.61236(16) 0.0250(5) Uani 1 1 d . . . . .
 C7 C 0.26899(15) 0.4899(2) 0.76849(14) 0.0175(4) Uani 1 1 d . . . . .
 C8 C 0.64970(17) 0.4955(3) 0.66878(15) 0.0244(5) Uani 1 1 d . . . . .
 C9 C 0.26024(17) 0.4692(3) 0.93439(15) 0.0210(4) Uani 1 1 d . . . . .
 C12 C 0.59440(18) 0.6045(3) 0.70262(16) 0.0265(5) Uani 1 1 d . . . . .
 C4 C 0.1597(2) 0.5289(3) 1.05400(17) 0.0302(5) Uani 1 1 d . . . . .
 C5 C 0.15174(18) 0.4793(3) 0.95199(16) 0.0243(5) Uani 1 1 d . . . . .
 O3 O 0.26309(11) 0.35124(17) 0.52239(10) 0.0213(3) Uani 1 1 d . . . . .
 O4 O 0.25388(11) 0.61686(16) 0.56787(10) 0.0209(3) Uani 1 1 d . . . . .
 Br1 Br 0.5059(3) 0.2447(5) 0.8351(4) 0.0417(6) Uani 0.526(18) 1 d . . P A 1
 H9A H 0.307(2) 0.407(3) 0.9813(18) 0.022(6) Uiso 1 1 d . . . . .
 H3 H 0.4554(19) 0.296(3) 0.5515(17) 0.020(6) Uiso 1 1 d . . . . .
 H9B H 0.2911(19) 0.565(3) 0.9384(17) 0.019(6) Uiso 1 1 d . . . . .
 H2 H 0.445(2) 0.667(3) 0.7012(18) 0.024(6) Uiso 1 1 d . . . . .
 H5A H 0.109(2) 0.548(3) 0.9072(19) 0.028(7) Uiso 1 1 d . . . . .
 H1 H 0.639(2) 0.308(3) 0.5899(19) 0.031(7) Uiso 1 1 d . . . . .
 H12 H 0.631(2) 0.681(3) 0.7401(18) 0.027(7) Uiso 1 1 d . . . . .
 H4A H 0.206(2) 0.458(3) 1.100(2) 0.038(8) Uiso 1 1 d . . . . .
 H5B H 0.116(2) 0.383(3) 0.9397(19) 0.033(7) Uiso 1 1 d . . . . .
 H4B H 0.091(3) 0.532(3) 1.065(2) 0.046(8) Uiso 1 1 d . . . . .
 H5 H 0.253(2) 0.322(4) 0.686(2) 0.035(8) Uiso 1 1 d . . . . .
 H4 H 0.245(2) 0.321(3) 0.8320(19) 0.029(7) Uiso 1 1 d . . . . .
 H4C H 0.189(2) 0.622(4) 1.068(2) 0.038(8) Uiso 1 1 d . . . . .
 C6A C 0.49592(18) -0.0394(3) 0.90817(17) 0.0358(6) Uani 1 1 d D U . . .
 Br1A Br 0.5138(3) 0.2768(9) 0.8560(4) 0.0550(8) Uani 0.474(18) 1 d . U P A 2
 C10A C 0.50345(18) 0.1095(3) 0.93310(19) 0.0370(6) Uani 1 1 d D U . . .
 C11A C 0.50728(18) 0.1477(3) 1.02633(19) 0.0371(6) Uani 1 1 d D U . . .
 F3A F 0.49033(12) -0.0804(2) 0.81791(11) 0.0522(5) Uani 1 1 d D U . . .
 F4A F 0.51403(13) 0.2908(2) 1.05410(15) 0.0561(5) Uani 1 1 d D U . . .

loop_
  _atom_site_aniso_label
  _atom_site_aniso_U_11
  _atom_site_aniso_U_22
  _atom_site_aniso_U_33
  _atom_site_aniso_U_23
  _atom_site_aniso_U_13
  _atom_site_aniso_U_12
 S1 0.0173(2) 0.0163(2) 0.0177(2) 0.00007(19) 0.00622(18) 0.00051(19)
 Cl2 0.0173(3) 0.0609(4) 0.0254(3) 0.0057(3) 0.0064(2) 0.0001(2)
 C 0.0176(9) 0.0188(10) 0.0173(9) 0.0027(8) 0.0065(8) -0.0005(8)
 O2 0.0284(8) 0.0154(7) 0.0230(8) 0.0003(6) 0.0101(6) 0.0010(6)
 C2 0.0242(11) 0.0232(11) 0.0228(11) -0.0026(9) 0.0089(9) 0.0007(9)
 C3 0.0247(11) 0.0201(11) 0.0240(11) 0.0011(9) 0.0102(9) -0.0004(9)
 N4 0.0246(9) 0.0158(9) 0.0214(9) -0.0008(7) 0.0103(7) -0.0013(7)
 N5 0.0219(9) 0.0133(9) 0.0221(9) 0.0003(7) 0.0096(7) -0.0009(7)
 C1 0.0239(11) 0.0271(12) 0.0271(11) 0.0039(9) 0.0123(9) 0.0066(9)
 C7 0.0151(9) 0.0171(10) 0.0214(10) 0.0001(8) 0.0069(8) 0.0031(8)
 C8 0.0177(10) 0.0352(13) 0.0214(10) 0.0074(9) 0.0074(8) 0.0002(9)
 C9 0.0253(11) 0.0193(11) 0.0190(10) -0.0016(8) 0.0073(8) -0.0008(9)
 C12 0.0249(11) 0.0314(12) 0.0226(11) -0.0041(10) 0.0053(9) -0.0061(10)
 C4 0.0416(14) 0.0274(13) 0.0272(12) -0.0028(10) 0.0193(11) -0.0021(11)
 C5 0.0280(12) 0.0238(11) 0.0233(11) 0.0006(9) 0.0109(9) 0.0015(9)
 O3 0.0229(7) 0.0217(8) 0.0197(7) -0.0020(6) 0.0065(6) -0.0017(6)
 O4 0.0227(7) 0.0182(7) 0.0223(7) 0.0025(6) 0.0070(6) 0.0022(6)
 Br1 0.0305(6) 0.0516(11) 0.0469(11) 0.0260(7) 0.0174(7) 0.0168(5)
 C6A 0.0145(10) 0.0666(18) 0.0259(12) -0.0039(12) 0.0049(9) -0.0012(11)
 Br1A 0.0270(5) 0.0913(17) 0.0479(12) 0.0189(13) 0.0123(7) 0.0141(9)
 C10A 0.0145(10) 0.0602(17) 0.0358(13) 0.0122(12) 0.0060(9) 0.0033(11)
 C11A 0.0174(11) 0.0494(16) 0.0441(15) -0.0046(13) 0.0072(10) -0.0005(11)
 F3A 0.0262(8) 0.1019(15) 0.0297(8) -0.0137(9) 0.0095(6) -0.0072(9)
 F4A 0.0354(9) 0.0555(11) 0.0809(13) -0.0140(10) 0.0217(9) -0.0050(8)

_geom_special_details
;
 All esds (except the esd in the dihedral angle between two l.s. planes)
 are estimated using the full covariance matrix.  The cell esds are taken
 into account individually in the estimation of esds in distances, angles
 and torsion angles; correlations between esds in cell parameters are only
 used when they are defined by crystal symmetry.  An approximate (isotropic)
 treatment of cell esds is used for estimating esds involving l.s. planes.
;
loop_
  _geom_bond_atom_site_label_1
  _geom_bond_atom_site_label_2
  _geom_bond_distance
  _geom_bond_site_symmetry_2
  _geom_bond_publ_flag
 S1 C 1.767(2) . ?
 S1 N5 1.6398(18) . ?
 S1 O3 1.4294(15) . ?
 S1 O4 1.4315(15) . ?
 Cl2 C8 1.733(2) . ?
 C C2 1.390(3) . ?
 C C3 1.392(3) . ?
 O2 C7 1.234(2) . ?
 C2 C12 1.390(3) . ?
 C2 H2 0.92(3) . ?
 C3 C1 1.389(3) . ?
 C3 H3 0.91(3) . ?
 N4 C7 1.326(3) . ?
 N4 C9 1.462(3) . ?
 N4 H4 0.80(3) . ?
 N5 C7 1.403(3) . ?
 N5 H5 0.78(3) . ?
 C1 C8 1.382(3) . ?
 C1 H1 0.95(3) . ?
 C8 C12 1.385(3) . ?
 C9 C5 1.520(3) . ?
 C9 H9A 0.96(3) . ?
 C9 H9B 0.95(3) . ?
 C12 H12 0.93(3) . ?
 C4 C5 1.525(3) . ?
 C4 H4A 1.00(3) . ?
 C4 H4B 0.97(3) . ?
 C4 H4C 0.92(3) . ?
 C5 H5A 0.96(3) . ?
 C5 H5B 0.97(3) . ?
 Br1 C10A 1.877(4) . ?
 C6A C10A 1.378(4) . ?
 C6A C11A 1.369(4) 3_657 ?
 C6A F3A 1.346(3) . ?
 Br1A C10A 1.899(5) . ?
 C10A C11A 1.386(4) . ?
 C11A F4A 1.340(3) . ?

loop_
  _geom_angle_atom_site_label_1
  _geom_angle_atom_site_label_2
  _geom_angle_atom_site_label_3
  _geom_angle
  _geom_angle_site_symmetry_1
  _geom_angle_site_symmetry_3
  _geom_angle_publ_flag
 N5 S1 C 106.52(9) . . ?
 O3 S1 C 108.13(9) . . ?
 O3 S1 N5 103.93(9) . . ?
 O3 S1 O4 120.30(9) . . ?
 O4 S1 C 107.83(9) . . ?
 O4 S1 N5 109.36(9) . . ?
 C2 C S1 120.39(16) . . ?
 C2 C C3 121.09(19) . . ?
 C3 C S1 118.49(16) . . ?
 C C2 H2 118.9(16) . . ?
 C12 C2 C 119.3(2) . . ?
 C12 C2 H2 121.8(16) . . ?
 C C3 H3 120.6(16) . . ?
 C1 C3 C 119.4(2) . . ?
 C1 C3 H3 120.0(16) . . ?
 C7 N4 C9 123.23(19) . . ?
 C7 N4 H4 119(2) . . ?
 C9 N4 H4 118(2) . . ?
 S1 N5 H5 114(2) . . ?
 C7 N5 S1 125.37(15) . . ?
 C7 N5 H5 119(2) . . ?
 C3 C1 H1 121.5(17) . . ?
 C8 C1 C3 119.2(2) . . ?
 C8 C1 H1 119.3(17) . . ?
 O2 C7 N4 125.57(19) . . ?
 O2 C7 N5 120.80(19) . . ?
 N4 C7 N5 113.63(18) . . ?
 C1 C8 Cl2 118.75(18) . . ?
 C1 C8 C12 121.7(2) . . ?
 C12 C8 Cl2 119.50(18) . . ?
 N4 C9 C5 111.85(18) . . ?
 N4 C9 H9A 108.0(15) . . ?
 N4 C9 H9B 108.0(14) . . ?
 C5 C9 H9A 111.2(15) . . ?
 C5 C9 H9B 110.0(15) . . ?
 H9A C9 H9B 108(2) . . ?
 C2 C12 H12 121.2(16) . . ?
 C8 C12 C2 119.3(2) . . ?
 C8 C12 H12 119.5(16) . . ?
 C5 C4 H4A 109.5(16) . . ?
 C5 C4 H4B 110.4(18) . . ?
 C5 C4 H4C 113.6(18) . . ?
 H4A C4 H4B 110(2) . . ?
 H4A C4 H4C 106(2) . . ?
 H4B C4 H4C 107(3) . . ?
 C9 C5 C4 111.0(2) . . ?
 C9 C5 H5A 109.4(16) . . ?
 C9 C5 H5B 110.6(16) . . ?
 C4 C5 H5A 110.5(16) . . ?
 C4 C5 H5B 109.7(16) . . ?
 H5A C5 H5B 106(2) . . ?
 C11A C6A C10A 121.1(2) 3_657 . ?
 F3A C6A C10A 120.1(3) . . ?
 F3A C6A C11A 118.8(3) . 3_657 ?
 C6A C10A Br1 116.1(3) . . ?
 C6A C10A Br1A 128.3(3) . . ?
 C6A C10A C11A 118.5(3) . . ?
 C11A C10A Br1 125.4(3) . . ?
 C11A C10A Br1A 113.2(4) . . ?
 C6A C11A C10A 120.4(3) 3_657 . ?
 F4A C11A C6A 118.7(2) . 3_657 ?
 F4A C11A C10A 120.9(3) . . ?

loop_
  _geom_torsion_atom_site_label_1
  _geom_torsion_atom_site_label_2
  _geom_torsion_atom_site_label_3
  _geom_torsion_atom_site_label_4
  _geom_torsion
  _geom_torsion_site_symmetry_1
  _geom_torsion_site_symmetry_2
  _geom_torsion_site_symmetry_3
  _geom_torsion_site_symmetry_4
  _geom_torsion_publ_flag
 S1 C C2 C12 -178.73(17) . . . . ?
 S1 C C3 C1 178.42(16) . . . . ?
 S1 N5 C7 O2 11.4(3) . . . . ?
 S1 N5 C7 N4 -168.44(15) . . . . ?
 Cl2 C8 C12 C2 179.47(17) . . . . ?
 C S1 N5 C7 70.64(19) . . . . ?
 C C2 C12 C8 0.4(3) . . . . ?
 C C3 C1 C8 0.3(3) . . . . ?
 C2 C C3 C1 0.1(3) . . . . ?
 C3 C C2 C12 -0.4(3) . . . . ?
 C3 C1 C8 Cl2 -179.82(17) . . . . ?
 C3 C1 C8 C12 -0.4(3) . . . . ?
 N4 C9 C5 C4 174.44(19) . . . . ?
 N5 S1 C C2 -76.98(19) . . . . ?
 N5 S1 C C3 104.69(17) . . . . ?
 C1 C8 C12 C2 0.0(3) . . . . ?
 C7 N4 C9 C5 107.2(2) . . . . ?
 C9 N4 C7 O2 0.1(3) . . . . ?
 C9 N4 C7 N5 179.95(18) . . . . ?
 O3 S1 C C2 171.83(17) . . . . ?
 O3 S1 C C3 -6.49(19) . . . . ?
 O3 S1 N5 C7 -175.28(17) . . . . ?
 O4 S1 C C2 40.31(19) . . . . ?
 O4 S1 C C3 -138.02(16) . . . . ?
 O4 S1 N5 C7 -45.64(19) . . . . ?
 Br1 C10A C11A C6A 179.4(2) . . . 3_657 ?
 Br1 C10A C11A F4A -0.5(4) . . . . ?
 C6A C10A C11A C6A 0.3(4) . . . 3_657 ?
 C6A C10A C11A F4A -179.6(2) . . . . ?
 Br1A C10A C11A C6A -178.0(2) . . . 3_657 ?
 Br1A C10A C11A F4A 2.1(3) . . . . ?
 C11A C6A C10A Br1 -179.5(2) 3_657 . . . ?
 C11A C6A C10A Br1A 177.7(2) 3_657 . . . ?
 C11A C6A C10A C11A -0.3(4) 3_657 . . . ?
 F3A C6A C10A Br1 -0.3(3) . . . . ?
 F3A C6A C10A Br1A -3.1(4) . . . . ?
 F3A C6A C10A C11A 178.9(2) . . . . ?

_shelx_res_file
;
TITL TH_SM14_autored in P21/n #14
    th_sm14_autored.res
    created by SHELXL-2017/1 at 11:44:18 on 07-Feb-2022
REM reset to P21/n #14
CELL 0.71073 13.162693 8.958124 14.544541 90 105.5843 90
ZERR 4 0.000238 0.000182 0.00031 0 0.002 0
LATT 1
SYMM 0.5-X,0.5+Y,0.5-Z
SFAC C H Br Cl F N O S
UNIT 52 52 4 4 8 8 12 4
SIMU 0.01 0.02 2 F4A C11A C10A Br1A C6A F3A
SIMU Br1
DANG 2.4 C11A C6A
SADI C11A C10A C10A C6A
SADI C11A F4A C6A F3A

L.S. 99
PLAN  1
SIZE 1.07 1.55 3.5
TEMP -173
CONF
MORE -1
BOND $H
fmap 2 53
acta
REM <olex2.extras>
REM <HklSrc "%.\\TH_SM14_autored.hkl">
REM </olex2.extras>

WGHT    0.023000    1.909400
FVAR       1.54574   0.52632
S1    8    0.294305    0.469081    0.590400    11.00000    0.01728    0.01625 =
         0.01771    0.00007    0.00622    0.00051
CL2   4    0.786089    0.505115    0.696674    11.00000    0.01727    0.06089 =
         0.02543    0.00572    0.00642    0.00013
C     1    0.433470    0.479782    0.623177    11.00000    0.01760    0.01875 =
         0.01731    0.00265    0.00649   -0.00050
O2    7    0.287672    0.625101    0.771656    11.00000    0.02836    0.01541 =
         0.02300    0.00029    0.01014    0.00100
C2    1    0.484975    0.597002    0.679409    11.00000    0.02424    0.02317 =
         0.02285   -0.00258    0.00887    0.00071
C3    1    0.489620    0.370771    0.589365    11.00000    0.02467    0.02009 =
         0.02399    0.00109    0.01019   -0.00043
N4    6    0.255159    0.408031    0.840089    11.00000    0.02460    0.01578 =
         0.02141   -0.00083    0.01027   -0.00127
N5    6    0.260830    0.408298    0.684526    11.00000    0.02185    0.01332 =
         0.02206    0.00030    0.00962   -0.00093
C1    1    0.598969    0.379214    0.612358    11.00000    0.02394    0.02709 =
         0.02708    0.00392    0.01228    0.00660
C7    1    0.268990    0.489934    0.768489    11.00000    0.01508    0.01713 =
         0.02140    0.00008    0.00690    0.00311
C8    1    0.649696    0.495544    0.668780    11.00000    0.01771    0.03516 =
         0.02144    0.00736    0.00739    0.00019
C9    1    0.260236    0.469249    0.934391    11.00000    0.02534    0.01934 =
         0.01897   -0.00160    0.00730   -0.00082
C12   1    0.594398    0.604478    0.702623    11.00000    0.02493    0.03137 =
         0.02264   -0.00411    0.00533   -0.00606
C4    1    0.159711    0.528906    1.054004    11.00000    0.04164    0.02736 =
         0.02725   -0.00280    0.01925   -0.00211
C5    1    0.151735    0.479325    0.951993    11.00000    0.02802    0.02378 =
         0.02330    0.00059    0.01093    0.00146
O3    7    0.263088    0.351241    0.522395    11.00000    0.02287    0.02172 =
         0.01967   -0.00205    0.00651   -0.00174
O4    7    0.253879    0.616857    0.567872    11.00000    0.02270    0.01818 =
         0.02230    0.00246    0.00699    0.00216
PART 1
BR1   3    0.505886    0.244672    0.835141    21.00000    0.03054    0.05163 =
         0.04687    0.02597    0.01735    0.01681

PART 0
H9A   2    0.306703    0.407218    0.981341    11.00000    0.02219
H3    2    0.455379    0.295754    0.551457    11.00000    0.02035
H9B   2    0.291054    0.565418    0.938398    11.00000    0.01944
H2    2    0.445329    0.667077    0.701165    11.00000    0.02423
H5A   2    0.108824    0.547572    0.907174    11.00000    0.02796
H1    2    0.639344    0.307652    0.589880    11.00000    0.03129
H12   2    0.630930    0.681388    0.740066    11.00000    0.02717
H4A   2    0.206249    0.458419    1.099799    11.00000    0.03826
H5B   2    0.115578    0.383445    0.939716    11.00000    0.03283
H4B   2    0.090627    0.531739    1.065168    11.00000    0.04633
H5    2    0.252963    0.321546    0.685617    11.00000    0.03505
H4    2    0.245472    0.320695    0.831974    11.00000    0.02852
H4C   2    0.188862    0.622099    1.068308    11.00000    0.03838

C6A   1    0.495917   -0.039354    0.908168    11.00000    0.01449    0.06664 =
         0.02594   -0.00392    0.00485   -0.00125
PART 2
BR1A  3    0.513812    0.276807    0.855977   -21.00000    0.02704    0.09130 =
         0.04789    0.01893    0.01234    0.01410
PART 0
C10A  1    0.503448    0.109496    0.933099    11.00000    0.01451    0.06021 =
         0.03583    0.01221    0.00595    0.00325
C11A  1    0.507278    0.147740    1.026334    11.00000    0.01741    0.04935 =
         0.04406   -0.00462    0.00718   -0.00050
F3A   5    0.490329   -0.080363    0.817909    11.00000    0.02622    0.10189 =
         0.02971   -0.01374    0.00945   -0.00725
F4A   5    0.514030    0.290831    1.054098    11.00000    0.03537    0.05553 =
         0.08085   -0.01401    0.02173   -0.00500
HKLF 4


REM  TH_SM14_autored in P21/n #14
REM R1 =  0.0340 for    3247 Fo > 4sig(Fo)  and  0.0363 for all    3378 data
REM    270 parameters refined using     33 restraints

END

WGHT      0.0230      1.9098

REM Highest difference peak  0.456,  deepest hole -0.367,  1-sigma level  0.055
Q1    1   0.7763  0.5976  0.7032  11.00000  0.05    0.46
;
_shelx_res_checksum                52606
_shelx_hkl_file
;
   0   0   2 1621.29 44.1144   5
   0   0  -2 1609.48 43.2485  10
   0   0   2 1651.81 44.2071   9
   0   0   3 63.0375 14.7068   5
   0   0  -3 73.9545 13.4210  10
   0   0   3 77.9357 14.9685   9
   0   0   4 23589.7 544.464   5
   0   0  -4 23238.2 543.194  10
   0   0   4 23706.3 545.454   9
   0   0   5 34.8777 18.9142   5
   0   0  -5 39.7555 19.4379   9
   0   0   5 49.5725 21.1253   9
   0   0   6 2752.34 82.9180   5
   0   0   6 2706.10 84.1637   9
   0   0  -6 2830.21 84.2509   9
   0   0   7 57.3462 26.6638   5
   0   0   7 50.3478 27.3073   9
   0   0   7 107.284 30.2667  10
   0   0  -7 68.7565 27.1107   9
   0   0   8 30703.7 729.442   5
   0   0   8 31053.3 733.116   9
   0   0  -8 31833.6 731.634   9
   0   0   9 40.1496 32.5904   5
   0   0   9-2.26523 33.9749   9
   0   0  -9 49.0672 32.3231   9
   0   0   9 21.3368 32.2733  10
   0   0  10-7.24591 33.7818   7
   0   0  10 18.4153 31.9464   5
   0   0 -10 41.9168 33.6844   9
   0   0  10 61.8801 37.9420   9
   0   0  10 76.3533 36.5422  10
   0   0  11-18.3146 37.7395   7
   0   0  11 13.0922 38.1798   5
   0   0  11 5.34986 40.5054   9
   0   0  11 68.7231 42.1935  10
   0   0 -11 66.0164 39.0034   9
   0   0  12 2668.09 98.0581   5
   0   0  12 2855.40 103.047  10
   0   0  12 2689.02 104.183   7
   0   0  12 2691.26 106.778   9
   0   0 -12 3060.53 103.845   9
   0   0  13 56.9623 47.2868   7
   0   0  13 50.6948 46.0049   5
   0   0  13 15.3081 47.4331   9
   0   0  13 44.6872 48.0696  10
   0   0 -13 93.9037 45.5114   9
   0   0  14 76.4179 51.5651   7
   0   0  14 132.521 49.3410   5
   0   0  14 138.619 58.5967  11
   0   0 -14 103.875 34.3787  13
   0   0 -14 59.7275 50.6034   9
   0   0  14 105.703 56.1423  10
   0   0  14 109.443 55.9602   9
   0   0  15 54.6395 50.6355   5
   0   0  15 106.336 55.9720   7
   0   0 -15 23.8954 35.8027  13
   0   0  15 31.4315 59.5799  11
   0   0  15 190.055 60.7142  10
   0   0 -15-47.4906 52.4472   9
   0   0  15 60.2931 57.5881   9
   0   0  16 223.384 57.0637   5
   0   0  16 124.228 62.0269   7
   0   0  16 265.038 66.7955  11
   0   0 -16 134.695 39.7722  13
   0   0 -16 195.741 57.2195   9
   0   0  16 293.749 67.8804  10
   0   0  16 111.479 61.2081   9
   0   0  17 67.0690 61.3214   7
   0   0  17 46.6697 57.4541   5
   0   0 -17 25.7354 40.5696  13
   0   0  17-7.19760 64.7423   9
   0   0 -17 72.1122 58.7967   9
   0  -1   0-4.02571 6.83341   7
   0   1   0-2.46121 5.89647   4
   0  -1   0 16.5521 5.72242  11
   0   1   0-1.47566 6.28098  13
   0  -1   1 41994.2 920.466   6
   0  -1   1 41037.2 918.697   5
   0  -1  -1 41715.3 923.211   7
   0   1   1 41663.2 921.646   4
   0  -1   1 42373.4 921.246   2
   0  -1   1 41786.5 917.604  12
   0   1  -1 38149.1 922.565  13
   0  -1  -1 42148.1 921.860  11
   0  -1  -1 41489.0 922.820   9
   0  -1   2 12459.4 288.727   5
   0  -1   2 12795.3 291.407   6
   0  -1   2 12577.2 291.353   2
   0   1   2 12716.4 291.710   4
   0  -1   2 12887.7 293.276  13
   0  -1   2 12714.8 288.705   9
   0  -1  -2 12405.8 296.039   9
   0  -1   3 41796.6 941.867   5
   0  -1   3 40788.6 942.235   2
   0   1   3 41753.2 942.596   4
   0  -1  -3 41337.2 943.792  10
   0  -1   3 41124.8 942.181   9
   0   1   3 40913.3 950.693   9
   0   1   3 42101.3 950.775   7
   0   1  -4 25222.2 571.029   5
   0  -1   4 25494.5 570.358   5
   0   1   4 24001.0 567.644   4
   0  -1  -4 24763.6 566.914   2
   0   1  -4 24123.3 568.002   4
   0  -1   4 25140.1 567.348   2
   0   1  -4 24930.6 573.217  13
   0  -1  -4 25185.2 572.157  10
   0   1   4 25477.4 580.134   7
   0  -1   4 24696.0 570.961   9
   0   1  -4 24381.7 570.652   9
   0   1   4 24846.1 579.966   9
   0  -1   5 1207.95 41.8970   5
   0   1  -5 1229.44 42.9911   5
   0   1   5 1213.86 35.6442   4
   0  -1  -5 1174.49 34.2629   2
   0  -1   5 1204.09 34.8845   2
   0   1   5 1291.35 50.3499   5
   0   1  -5 1233.95 36.3359   4
   0   1  -5 1284.22 43.2195  13
   0  -1  -5 1241.81 43.7400  10
   0   1   5 1249.63 49.9629   7
   0  -1   5 1165.35 42.6259   9
   0   1   5 1262.02 50.8912   9
   0   1  -5 1238.87 42.1096   9
   0  -1   6 5329.51 136.301   5
   0   1   6 5391.87 146.237   5
   0   1  -6 5395.32 138.835   5
   0   1  -6 5185.77 127.004   4
   0   1   6 5326.91 126.505   4
   0  -1   6 5177.74 125.172   2
   0  -1  -6 5191.97 124.577   2
   0   1  -6 5339.14 136.720  13
   0  -1  -6 5382.96 137.892  10
   0   1   6 5248.76 139.674  10
   0  -1  -6 5288.24 145.307   9
   0  -1   6 5364.68 137.817   9
   0   1   6 5338.70 147.126   9
   0   1  -6 5393.39 137.496   9
   0   1   6 5534.16 146.630   7
   0  -1   7 4616.37 124.381   5
   0   1   7 4706.61 134.456   5
   0   1  -7 4407.89 126.835   5
   0  -1  -7 4475.23 125.342  10
   0   1   7 4612.19 128.418  10
   0   1  -7 4705.37 124.342  13
   0   1  -7 4627.30 125.444   9
   0   1   7 4858.08 136.050   9
   0  -1  -7 4885.35 134.760   9
   0  -1   7 4587.55 126.445   9
   0   1   7 4644.81 134.230   7
   0   1  -8 9522.67 243.523   5
   0  -1   8 9498.31 239.576   5
   0   1   8 9639.14 248.746   5
   0  -1  -8 9737.47 242.140  10
   0   1  -8 9443.33 238.763  13
   0  -1   8 9700.74 242.886   9
   0  -1  -8 9747.56 250.147   9
   0   1   8 9519.23 250.017   7
   0   1   8 9701.23 251.625   9
   0   1  -8 9760.07 241.750   9
   0   1   9 729.784 49.6481   5
   0  -1   9 638.161 41.6987   5
   0  -1  -9 655.762 45.4565  10
   0  -1   9 721.965 47.9641  10
   0   1  -9 607.170 37.0756  13
   0  -1  -9 692.636 50.5202   9
   0   1   9 714.833 52.3681   9
   0   1   9 757.969 51.4187   7
   0   1  -9 646.798 43.1733   9
   0  -1   9 732.424 45.1855   9
   0  -1  10 2836.56 95.7058   5
   0   1  10 2924.59 102.516   5
   0   1 -10 3094.50 94.4461  13
   0  -1  10 3169.76 102.395  10
   0   1  10 3090.90 103.118  10
   0   1 -10 2819.24 96.8846   9
   0   1  10 3050.21 108.596   9
   0  -1 -10 3059.46 106.628   9
   0   1  10 3172.31 109.220   7
   0  -1  10 2888.51 99.5891   9
   0  -1  11 22448.5 534.469   5
   0   1  11 21626.8 542.380   5
   0   1 -11 22833.3 533.676  13
   0   1  11 22492.7 541.224  10
   0  -1  11 22784.4 539.990  10
   0   1  11 21820.3 552.512  11
   0   1  11 22701.4 550.008   7
   0   1 -11 22613.8 537.355   9
   0  -1  11 22515.1 540.840   9
   0   1  11 21464.3 547.598   9
   0  -1 -11 22609.8 545.989   9
   0   1  12 4594.42 143.836   5
   0  -1  12 4748.28 136.801   5
   0   1  12 4728.39 144.486  10
   0  -1  12 4661.65 143.517  10
   0   1 -12 4520.50 132.681  13
   0   1  12 4433.35 154.393  11
   0   1  12 4469.09 149.430   7
   0  -1 -12 4703.45 147.145   9
   0  -1  12 4554.71 143.076   9
   0   1 -12 4517.50 138.263   9
   0   1  12 4417.57 150.748   9
   0   1  13 2806.82 107.382   5
   0  -1  13 2881.16 100.638   5
   0   1 -13 2865.95 96.6418  13
   0   1  13 2896.08 119.373  11
   0   1  13 2942.58 110.395  10
   0  -1  13 3102.67 108.458  10
   0  -1  13 2676.99 105.705   9
   0  -1  13 2877.35 106.485   7
   0   1 -13 2816.23 101.723   9
   0   1  13 2814.41 113.297   7
   0   1  13 2822.17 115.046   9
   0  -1 -13 2874.40 110.703   9
   0  -1  14 35.5657 46.3384   5
   0  -1  14 72.0563 46.9789   7
   0   1  14 90.6502 53.3058   7
   0   1  14-14.0180 51.6969   5
   0   1 -14 30.4847 35.5842  13
   0   1  14 23.5388 57.1032  11
   0  -1  14 93.6637 52.0529   9
   0   1  14 45.7172 56.4307   9
   0  -1 -14 21.3412 53.0259   9
   0   1  14 17.5847 56.6108  10
   0  -1  14 129.375 55.7360  10
   0   1 -14 131.981 48.3060   9
   0   1  15 125.891 55.0384   5
   0   1  15 90.4195 59.7473   7
   0  -1  15 167.431 51.3717   5
   0  -1  15 109.192 53.1316   7
   0   1  15 139.069 63.1571  11
   0   1 -15 87.1099 39.4448  13
   0  -1  15 21.4674 51.9406   9
   0  -1  15 207.606 58.3849  10
   0   1  15 62.6662 59.3395   9
   0   1  15 110.187 62.8128  10
   0   1 -15 133.715 51.6439   9
   0  -1 -15 197.798 58.2029   9
   0  -1  16 63.4302 56.1793   7
   0   1  16 112.868 58.9125   5
   0   1  16 78.4826 60.4784   7
   0  -1  16 186.325 53.2766   5
   0  -1  16 50.8706 63.0958  11
   0   1 -16-41.8290 41.7831  13
   0   1  16 46.5384 63.0178  11
   0  -1 -16 111.671 61.0601   9
   0  -1  16 69.3176 63.1269  10
   0   1  16-19.0892 60.8162   9
   0   1  16 114.493 66.8032  10
   0   1 -16 62.8518 52.7072   9
   0  -1  16 76.1684 56.8853   9
   0   1  17 1474.07 90.7710   7
   0   1  17 1324.63 83.9612   5
   0  -1  17 1408.51 78.1851   5
   0  -1 -17 1346.05 63.3214  13
   0   1 -17 1374.74 66.0188  13
   0  -1  17 1243.45 93.4733  11
   0   1  17 1449.20 96.6818   9
   0  -1  17 1197.54 84.9257   7
   0   1 -17 1456.29 78.9298   9
   0  -1  17 1409.14 87.0545   9
   0  -1 -17 1238.41 84.9785   9
   0  -2   0 49725.8 1140.34   7
   0   2   0 49956.4 1142.17   4
   0   2   0 48814.7 1145.84  13
   0  -2   0 50304.5 1136.68  11
   0  -2   1 3388.67 92.2930   6
   0  -2   1 3526.85 92.0135   7
   0  -2  -1 3623.24 95.0949   7
   0   2   1 3407.25 93.6227   4
   0  -2   1 3502.40 93.4142   2
   0   2  -1 2855.03 91.8412   4
   0   2  -1 2859.89 93.7580  13
   0   2   1 3559.42 97.7002  13
   0  -2   1 3526.42 97.2162  13
   0  -2   1 3460.35 87.4401  11
   0  -2  -1 3591.36 92.2727  11
   0  -2   1 3518.81 86.9936  12
   0  -2  -1 3355.01 93.7586   9
   0  -2   2 274.747 20.0970   6
   0  -2  -2 270.094 23.3701   7
   0   2   2 262.330 21.2070   4
   0  -2   2 272.565 22.2202   2
   0  -2   2 256.601 23.2234  13
   0  -2  -2 286.639 21.9793  11
   0  -2   2 260.940 16.9352  12
   0  -2  -2 305.061 23.1698   9
   0   2  -3 17786.5 427.212   6
   0   2  -3 18321.7 423.292   5
   0   2   3 18698.0 437.487   7
   0  -2   3 18358.5 429.469   6
   0  -2   3 18196.8 424.769   5
   0  -2   3 18682.5 430.324   2
   0   2   3 18260.0 430.723   4
   0  -2   3 18457.7 432.802  13
   0  -2   3 18206.0 424.725  12
   0  -2  -3 18211.3 436.069   9
   0  -2   3 18500.4 423.431   9
   0   2  -4 908.244 30.5142   5
   0  -2   4 879.855 31.5284   5
   0  -2   4 857.671 35.9498   6
   0   2   4 809.324 43.3455   7
   0   2  -4 869.816 35.9380   4
   0  -2  -4 798.329 34.0749   2
   0   2   4 779.976 34.5214   4
   0  -2   4 726.043 33.8974   2
   0   2  -4 807.705 38.3758  13
   0  -2   4 848.704 37.7158  13
   0   2   4 818.078 42.5689   9
   0  -2  -4 853.016 35.1623  10
   0  -2   4 859.439 31.3037   9
   0   2   5 6929.00 183.124   7
   0   2  -5 6875.30 166.994   5
   0  -2   5 6847.06 172.557   6
   0  -2   5 6954.15 167.582   5
   0  -2  -5 6767.96 168.994   2
   0   2   5 6490.07 169.811   4
   0  -2   5 6835.39 169.403   2
   0   2  -5 6617.43 170.283   4
   0  -2  -5 6991.02 171.437  10
   0   2  -5 7079.98 177.535  13
   0  -2   5 6809.12 167.760   9
   0   2  -5 6840.66 167.196   9
   0   2   5 6667.93 182.638   9
   0   2  -6 18759.1 445.037   5
   0  -2   6 18937.3 445.000   5
   0  -2   6 18821.7 450.303   6
   0  -2   6 19411.7 444.178   2
   0   2  -6 19070.7 446.625   4
   0   2   6 19195.8 445.734   4
   0  -2  -6 18771.1 443.541   2
   0  -2  -6 19137.1 448.298  10
   0   2  -6 18959.1 454.764  13
   0   2  -6 18942.6 445.086   9
   0  -2   6 18965.6 445.837   9
   0   2   6 19314.8 462.512   7
   0   2   6 19172.0 462.257   9
   0   2   7 314.317 38.0381   7
   0   2  -7 380.815 29.6745   5
   0  -2   7 312.419 28.2333   5
   0  -2  -7 314.981 22.3653   2
   0   2  -7 337.521 25.1288   4
   0  -2   7 317.011 22.5224   2
   0   2   7 338.646 24.6242   4
   0   2   7 334.290 40.3774  11
   0  -2  -7 388.552 32.6895  10
   0   2  -7 358.531 31.2865  13
   0  -2  -7 344.824 39.5101   9
   0   2   7 325.514 42.0820   9
   0  -2   7 320.795 30.1102   9
   0   2  -7 313.047 28.9744   9
   0   2   8 8244.83 220.615   5
   0   2  -8 7947.72 205.429   5
   0  -2   8 7974.35 202.993   5
   0   2  -8 7775.91 197.693   4
   0  -2  -8 8110.39 193.717   2
   0  -2   8 8097.71 194.240   2
   0   2   8 8189.79 197.412   4
   0   2   8 7864.11 221.768  11
   0   2  -8 7968.40 210.699  13
   0  -2  -8 8193.53 207.324  10
   0   2   8 8168.97 221.875   7
   0  -2  -8 8423.64 221.867   9
   0  -2   8 7901.79 204.811   9
   0   2   8 8330.11 222.394   9
   0   2  -8 8229.54 204.458   9
   0  -2   9 801.142 44.1592   5
   0   2   9 873.768 60.6162   5
   0   2  -9 919.975 48.9138   5
   0  -2  -9 867.646 31.2469   1
   0  -2   9 909.617 30.9863   1
   0   2   9 854.090 59.1327  11
   0   2  -9 872.391 49.6049  13
   0  -2   9 942.148 54.1150  10
   0  -2  -9 857.991 49.1242  10
   0  -2   9 890.297 46.9384   9
   0   2  -9 852.988 46.0517   9
   0  -2  -9 810.513 58.3564   9
   0   2   9 949.648 60.0228   7
   0   2   9 946.636 61.4801   9
   0   2 -10 13250.0 311.398   5
   0  -2  10 12429.7 305.137   5
   0   2  10 13947.6 327.208   5
   0  -2  10 11536.0 284.101   1
   0  -2 -10 12270.5 284.338   3
   0  -2 -10 11815.6 284.271   1
   0  -2  10 12361.1 284.272   3
   0  -2  10 12382.8 284.326   1
   0  -2  10 14528.6 317.105  10
   0  -2 -10 14087.7 313.247  10
   0   2  10 14365.6 333.318  11
   0   2 -10 14351.5 315.704  13
   0   2  10 13913.1 328.698   7
   0  -2 -10 14411.9 329.559   9
   0   2  10 14325.2 330.655   9
   0  -2  10 13685.7 310.533   9
   0   2 -10 13782.2 309.320   9
   0   2  10 13821.9 318.189  10
   0   2  11 569.301 58.0589   7
   0  -2  11 512.029 43.3240   5
   0   2  11 559.368 58.7655   5
   0  -2 -11 544.968 50.9752  10
   0  -2  11 625.823 56.7287  10
   0   2  11 628.027 60.9893  11
   0   2 -11 513.651 46.1764  13
   0  -2  11 586.036 47.8967   9
   0   2  11 432.982 54.2422  10
   0   2 -11 660.232 47.9567   9
   0   2  11 629.712 62.7912   9
   0  -2 -11 467.705 57.0302   9
   0  -2  12 204.705 38.9218   5
   0   2  12 231.746 54.0138   7
   0   2  12 172.875 50.3197   5
   0   2 -12 151.507 39.0393  13
   0   2  12 194.173 52.7611  11
   0  -2  12 147.404 50.4353  10
   0   2 -12 152.657 40.3154   9
   0  -2  12 123.548 42.1385   9
   0  -2 -12 194.083 54.9109   9
   0   2  12 248.266 56.1170   9
   0  -2 -12 143.215 46.7048  10
   0   2  12 66.5095 50.6093  10
   0   2  13 2205.35 97.4134   5
   0  -2  13 2059.69 83.1047   5
   0   2  13 2213.60 104.120   7
   0   2  13 2077.93 104.612  11
   0   2 -13 2249.45 85.8814  13
   0  -2  13 2328.53 95.6394  10
   0   2  13 2128.67 103.850   9
   0  -2 -13 2069.05 101.846   9
   0   2  13 2157.56 97.0152  10
   0   2 -13 2293.98 87.0783   9
   0  -2  13 2240.76 89.0686   9
   0   2  14 321.497 62.2192   7
   0  -2  14 445.294 51.4784   5
   0   2  14 417.457 63.5210   5
   0   2 -14 398.769 47.6992  13
   0   2  14 377.391 67.8437  11
   0   2 -14 412.831 52.6689   9
   0  -2 -14 401.999 65.6053   9
   0  -2  14 387.705 55.9963   9
   0   2  14 433.832 71.5914   9
   0  -2  14 426.253 63.7803  10
   0  -2  15 167.487 47.9087   5
   0  -2  15 166.247 51.0160   7
   0   2  15 163.469 62.7380   7
   0   2  15 143.692 59.5167   5
   0   2 -15 176.232 41.9177  13
   0   2  15 141.112 64.2311  11
   0   2  15 177.342 69.5258   9
   0  -2 -15 184.243 65.1190   9
   0   2 -15 149.603 50.4845   9
   0  -2  15 147.463 53.7226   9
   0  -2  15 183.552 60.6338  10
   0  -2  16 452.244 61.3748   7
   0   2  16 394.892 72.0569   7
   0  -2  16 467.653 57.9974   5
   0   2  16 327.745 65.5944   5
   0   2 -16 404.144 50.7050  13
   0  -2  16 520.954 62.9216   9
   0   2  16 437.958 76.1047   9
   0   2 -16 442.042 57.5906   9
   0  -2 -16 500.469 72.8716   9
   0  -2  17 24.2288 54.7135   7
   0   2  17 42.0988 65.0229   5
   0   2  17 105.404 70.1553   7
   0   2 -17 128.922 44.6851  13
   0  -2  17 42.6729 64.4813  11
   0   2 -17 102.793 53.4915   9
   0   2  17 62.9598 72.0141   9
   0  -2 -17 10.8039 65.4236   9
   0  -3   0-11.9255 20.7289   7
   0   3   0-5.58659 20.6578   4
   0   3   0 1.20473 14.5654  12
   0  -3   0 5.10443 16.2003  11
   0   3   0 15.4829 20.6104  13
   0  -3  -1 571.126 35.8243   7
   0  -3   1 575.210 33.7246   7
   0  -3   1 606.438 35.0231   2
   0   3   1 651.513 36.1331   4
   0   3  -1 494.868 33.0904   4
   0  -3   1 649.633 40.4985  13
   0  -3  -1 600.548 32.3641  11
   0   3   1 711.860 40.1857  13
   0   3  -1 620.440 29.6706  11
   0   3  -1 620.773 28.8264  12
   0  -3   1 565.983 28.3608  11
   0  -3  -1 650.087 35.0814   9
   0  -3  -2 20869.8 484.635   7
   0  -3   2 20085.6 477.911   7
   0  -3   2 20728.5 480.217   6
   0   3  -2 20295.7 474.123   5
   0  -3   2 19958.4 480.519   2
   0   3   2 19905.8 481.639   4
   0  -3  -2 20398.6 479.506  11
   0   3  -2 20119.8 469.700  12
   0  -3   2 19873.7 471.081  11
   0  -3   2 20089.0 484.909  13
   0  -3   2 20214.4 470.647  12
   0  -3  -2 20318.2 483.284   9
   0   3  -3 27695.9 637.081   6
   0   3  -3 27681.1 631.412   5
   0  -3  -3 27029.4 645.370   7
   0  -3   3 27235.8 638.888   6
   0  -3   3 27164.9 636.523   7
   0  -3  -3 24691.8 637.839   2
   0   3   3 27581.3 641.771   4
   0  -3   3 27850.8 640.660   2
   0  -3   3 27798.8 644.217  13
   0  -3  -3 27510.7 642.647  11
   0  -3   3 27299.5 630.653  12
   0  -3  -3 27965.0 645.936   9
   0   3  -4 16851.6 393.814   5
   0  -3   4 16680.4 397.454   5
   0   3  -4 17005.2 400.197   6
   0  -3   4 16942.9 403.057   6
   0   3   4 17026.9 412.906   7
   0   3  -4 16652.2 405.533   4
   0  -3   4 16592.4 403.262   2
   0  -3  -4 17017.0 403.930   2
   0   3   4 16627.7 404.795   4
   0   3  -4 16974.7 412.349  13
   0  -3  -4 16971.0 413.564  13
   0  -3   4 16799.6 407.425  13
   0  -3   4 16804.1 395.764  12
   0  -3  -4 16576.4 411.599   9
   0  -3   4 16767.2 393.631   9
   0   3  -5 413.034 25.8172   5
   0   3   5 366.768 37.5148   7
   0  -3   5 386.066 27.9215   5
   0  -3   5 401.715 32.2464   6
   0   3  -5 382.672 32.7606   4
   0  -3  -5 406.046 31.8706   2
   0  -3   5 378.111 31.1187   2
   0   3   5 340.758 30.8726   4
   0   3  -5 416.085 37.2924  13
   0  -3   5 341.714 32.6607  13
   0  -3   5 432.323 28.7834  12
   0  -3   5 396.695 26.1427   9
   0  -3  -5 401.258 30.8194  10
   0   3   6 9154.51 242.802   7
   0   3  -6 8997.53 218.921   5
   0  -3   6 9319.22 229.512   6
   0  -3   6 8694.03 220.956   5
   0   3   6 8941.80 227.310   4
   0   3  -6 8714.73 228.018   4
   0  -3  -6 8874.10 225.524   2
   0  -3   6 9041.52 225.612   2
   0  -3  -6 9321.72 225.930  10
   0   3  -6 9120.40 237.104  13
   0  -3   6 9192.74 229.625  13
   0   3   6 9008.49 242.196   9
   0  -3   6 8808.70 219.527   9
   0   3   7 42.3066 35.7681   7
   0  -3   7 64.4485 23.9197   5
   0  -3   7 63.4990 28.9901   6
   0   3  -7 53.6961 24.0105   5
   0   3  -7 35.3730 25.1151   4
   0   3   7 54.7284 24.5128   4
   0  -3  -7 38.0716 22.5951   2
   0  -3   7 23.9318 23.3197   2
   0   3  -7 47.0225 30.1389  13
   0  -3   7 79.8376 24.1169   9
   0   3   7 50.4251 38.9674   9
   0  -3  -7 141.378 31.6680  10
   0  -3   8 598.793 36.9345   5
   0  -3   8 621.741 42.1214   6
   0   3  -8 614.449 37.8316   5
   0   3   8 571.885 53.3148   7
   0  -3   8 707.697 37.1790   2
   0  -3  -8 675.337 36.2897   2
   0   3  -8 683.673 39.6612   4
   0   3   8 697.657 39.3378   4
   0  -3  -8 719.698 43.9434  10
   0   3   8 551.389 51.6294  11
   0   3  -8 699.926 47.4317  13
   0  -3   8 586.232 39.2780   9
   0  -3  -8 569.814 56.1145   9
   0   3   8 642.384 56.5283   9
   0   3  -8 637.596 38.4552   9
   0  -3   9 1314.09 62.4824   6
   0   3  -9 1286.80 56.2854   5
   0  -3   9 1364.74 55.7437   5
   0   3   9 1389.01 76.8847   5
   0   3   9 1409.21 78.1294   7
   0   3   9 1469.70 56.1564   4
   0  -3   9 1426.37 51.6287   2
   0  -3  -9 1389.25 51.2997   2
   0   3  -9 1284.70 55.0728   4
   0  -3  -9 1480.51 63.3760  10
   0   3  -9 1485.75 67.8681  13
   0   3   9 1398.63 75.3067  11
   0   3  -9 1360.45 55.7352   9
   0  -3  -9 1492.26 77.6327   9
   0   3   9 1524.67 79.5866   9
   0  -3   9 1429.32 58.7042   9
   0  -3  10 54.3048 31.8939   5
   0   3  10-3.60183 45.0198   7
   0  -3  10 73.8718 36.6989   6
   0  -3 -10 35.8623 23.5662   1
   0   3 -10 78.6128 34.1441   5
   0   3  10 23.5695 48.9337   5
   0   3  10 41.0005 24.8520   4
   0   3 -10 10.3801 25.4241   4
   0  -3  10 87.8687 24.0271   2
   0   3 -10 21.6860 34.5578  13
   0   3  10 42.4881 48.4781  11
   0  -3  10-7.24155 33.6294   9
   0  -3 -10 40.6091 47.4788   9
   0   3 -10 49.4513 31.1860   9
   0  -3  10 67.9161 45.3751  10
   0   3  10 42.6908 49.0328   9
   0  -3 -10-24.5439 38.3671  10
   0   3  11 923.325 73.2468   5
   0   3 -11 835.926 53.0485   5
   0   3  11 922.422 73.0258   7
   0  -3  11 886.970 51.3153   5
   0  -3  11 764.199 55.7465   6
   0  -3  11 875.180 36.4475   1
   0  -3 -11 852.599 36.4860   1
   0  -3 -11 1051.24 62.2970  10
   0  -3  11 1002.41 66.7987  10
   0   3  11 942.884 72.5392  11
   0   3 -11 956.617 59.7983  13
   0   3  11 942.025 75.3940   9
   0  -3  11 920.555 54.0204   9
   0  -3 -11 1021.61 74.2886   9
   0   3 -11 957.130 52.4240   9
   0   3  12 859.334 72.6306   5
   0  -3  12 797.513 50.8833   5
   0  -3  12 826.844 57.4541   6
   0   3  12 900.147 75.0273   7
   0  -3  12 726.890 29.1051   3
   0  -3 -12 753.983 29.5393   1
   0  -3  12 744.111 29.1569   1
   0  -3 -12 717.436 29.5645   3
   0  -3 -12 724.782 29.4215   1
   0  -3  12 721.916 29.1248   1
   0   3 -12 939.676 61.1617  13
   0  -3  12 890.075 65.9185  10
   0   3  12 820.631 74.6814  11
   0  -3 -12 811.174 59.6698  10
   0   3 -12 874.325 53.0748   9
   0   3  12 792.019 74.2295   9
   0  -3 -12 964.532 73.5673   9
   0  -3  12 864.320 54.9636   9
   0  -3  13 32.9273 45.3857   6
   0   3  13-12.3495 57.1915   7
   0  -3  13 39.2768 39.7864   5
   0   3  13 43.2196 59.9813   5
   0   3  13-54.0272 57.1762  11
   0   3 -13 20.3044 41.7720  13
   0  -3 -13-68.4369 52.1634  10
   0  -3  13 11.2580 54.5789  10
   0  -3 -13-87.1381 62.3807   9
   0   3  13-8.20015 62.5851   9
   0   3 -13-10.5286 42.2346   9
   0  -3  13 36.5598 43.9039   9
   0  -3  14 2897.97 108.277   5
   0   3  14 3402.09 132.268   5
   0  -3  14 3307.06 116.297   6
   0   3  14 3635.99 139.869   7
   0  -3  14 3606.50 126.277  10
   0   3 -14 3379.96 118.987  13
   0  -3 -14 3321.33 120.318  10
   0   3  14 3562.36 141.132  11
   0  -3 -14 3446.76 134.986   9
   0   3 -14 3467.88 113.007   9
   0  -3  14 3427.58 116.001   9
   0   3  14 3367.08 137.897   9
   0   3  15 137.847 64.0237   5
   0  -3  15 96.3209 47.3644   5
   0  -3  15 154.210 52.2074   6
   0   3  15 74.0827 64.6615   7
   0   3 -15 124.618 46.9440  13
   0   3  15 72.0138 65.5383  11
   0   3  15 189.243 71.0995   9
   0  -3  15 32.8448 50.2147   9
   0   3 -15 116.145 48.9135   9
   0  -3  15 82.3122 63.4266  10
   0  -3 -15 63.1976 67.1410   9
   0  -3  16-18.4109 50.0715   5
   0   3  16 240.690 68.1033   5
   0   3  16 22.1555 66.5613   7
   0  -3  16 88.4304 51.4269   6
   0  -3 -16 65.8008 49.0467  13
   0   3 -16 119.075 51.2705  13
   0   3 -16 58.5586 50.0598   9
   0   3  16 109.220 73.7527   9
   0  -3 -16 27.8807 70.8307   9
   0  -4   0 10455.5 261.938   7
   0   4   0 9648.49 262.409   4
   0  -4   0 10408.9 253.554  11
   0   4   0 10292.9 252.213  12
   0   4   0 10044.8 252.318  11
   0   4   0 9984.02 269.472  13
   0  -4  -1 4219.17 125.111   7
   0  -4   1 4215.67 122.478   7
   0   4   1 4009.57 125.054   4
   0   4  -1 3619.61 122.364   4
   0  -4   1 4086.50 114.220  11
   0  -4  -1 4081.82 117.546  11
   0   4  -1 4097.25 112.710  11
   0   4   1 4083.18 116.950  11
   0  -4   1 4408.30 132.140  13
   0   4  -1 4064.32 111.995  12
   0   4   1 4083.75 131.704  13
   0  -4  -1 3933.16 122.014   9
   0  -4  -2 2537.86 89.3036   7
   0  -4   2 2522.76 84.2288   7
   0   4  -2 2353.09 79.3761   5
   0   4  -2 2398.35 83.6432   6
   0  -4   2 2486.97 86.7628   2
   0   4   2 2588.91 88.2247   4
   0   4   2 2224.75 81.4558  11
   0  -4   2 2521.17 91.8992  13
   0   4  -2 2565.65 74.7405  12
   0  -4   2 2390.24 75.8881  11
   0  -4  -2 2589.87 84.2111  11
   0  -4  -2 2367.75 87.6907   9
   0   4  -3 2615.70 86.1278   6
   0  -4   3 2537.28 85.6754   7
   0  -4   3 2440.49 86.3421   6
   0  -4  -3 2657.86 91.7553   7
   0   4  -3 2570.87 79.4935   5
   0  -4  -3 2236.19 84.9895   2
   0  -4   3 2404.96 86.4926   2
   0   4   3 2480.42 89.2446   4
   0  -4   3 2587.15 91.1377  13
   0  -4   3 2521.52 76.5472  11
   0   4  -3 2468.04 73.9485  12
   0  -4  -3 2490.81 86.9361  11
   0  -4   3 2568.53 76.5511  12
   0  -4  -3 2483.09 90.8628   9
   0   4  -4 10138.4 250.957   6
   0   4  -4 9662.90 242.385   5
   0  -4   4 9996.02 251.567   7
   0  -4   4 10459.0 255.514   6
   0   4  -4 9871.49 257.230   4
   0  -4  -4 10200.8 255.956   2
   0   4   4 9926.38 256.578   4
   0  -4   4 10104.9 255.253   2
   0  -4  -4 10070.3 265.845  13
   0   4  -4 9874.09 264.362  13
   0  -4  -4 9593.47 257.706  11
   0  -4   4 9659.02 242.662  12
   0  -4   4 9885.62 259.186  13
   0   4   4 9829.53 231.907   8
   0  -4  -4 9568.33 260.226   7
   0  -4  -4 9601.51 260.538   9
   0  -4   5 994.865 48.5882   7
   0   4   5 968.635 57.8465   7
   0   4  -5 849.088 44.7775   6
   0  -4   5 776.242 46.7528   6
   0   4  -5 876.531 39.5840   5
   0   4  -5 779.759 50.1911   4
   0  -4  -5 829.719 48.6214   2
   0   4   5 909.501 49.9699   4
   0  -4   5 887.087 49.3410   2
   0  -4   5 753.633 50.4259  13
   0  -4   5 815.781 40.8185  12
   0   4  -5 828.068 54.3708  13
   0  -4  -5 951.878 57.5034   9
   0  -4   5 827.209 38.8443   9
   0   4  -6 1437.82 51.5628   5
   0   4   6 1473.10 74.4166   7
   0  -4   6 1401.03 62.5144   6
   0  -4   6 1327.90 59.3898   2
   0   4  -6 1343.95 62.8994   4
   0  -4  -6 1354.20 60.7981   2
   0   4   6 1267.64 61.3819   4
   0  -4   6 1430.44 63.9069  13
   0   4  -6 1337.57 68.2866  13
   0  -4   6 1346.24 55.0338  12
   0  -4   6 1434.87 52.0981   9
   0  -4  -6 1407.98 58.2298  10
   0  -4   7 82.2174 33.1619   6
   0  -4   7 48.0117 28.4880   5
   0   4   7 51.7511 42.2636   7
   0  -4  -7 77.1459 41.8392   7
   0   4  -7 92.4474 25.2006   5
   0   4   7 62.1336 31.3193   4
   0   4  -7 49.9094 33.3639   4
   0  -4  -7 24.1161 28.6205   2
   0  -4   7 20.3019 29.4415   2
   0   4   7 57.0943 36.9528  11
   0   4  -7 41.0738 36.6389  13
   0  -4   7 75.1424 31.3025  13
   0  -4   7 76.2084 28.6122  12
   0   4   7 62.8717 44.4029   9
   0  -4  -7 60.5945 31.5898  10
   0  -4   7 49.9328 25.6544   9
   0   4   8 720.859 62.1208   7
   0  -4   8 729.965 43.2643   5
   0   4  -8 746.726 40.3295   5
   0  -4   8 870.696 52.6570   6
   0  -4   8 724.184 45.5226   2
   0   4   8 757.064 49.0726   4
   0   4  -8 664.748 47.2328   4
   0  -4  -8 743.640 45.1748   2
   0   4   8 563.708 57.4395  11
   0   4  -8 766.090 57.9187  13
   0  -4  -8 762.624 48.8955  10
   0  -4   8 748.477 45.7904  12
   0   4   8 738.439 63.4641   9
   0  -4   8 712.167 41.2823   9
   0  -4   9 3622.50 108.387   5
   0   4   9 3638.55 135.466   7
   0  -4   9 3753.84 118.670   6
   0   4  -9 3675.68 106.682   5
   0  -4  -9 3570.54 108.132   2
   0  -4   9 3602.10 109.251   2
   0   4  -9 3392.22 114.022   4
   0   4   9 3609.09 113.939   4
   0  -4  -9 3784.88 114.714  10
   0  -4  -9 3674.30 129.725  13
   0   4  -9 3753.56 128.726  13
   0   4   9 3736.37 133.228  11
   0  -4   9 3700.86 107.611   9
   0   4   9 3814.42 135.973   9
   0  -4  -9 3528.08 132.500   9
   0  -4  10 462.844 39.5654   5
   0   4  10 548.952 65.9246   7
   0  -4  10 405.435 49.8020   6
   0   4 -10 475.213 40.5894   5
   0   4  10 360.561 40.5373   4
   0   4 -10 401.700 42.8163   4
   0  -4  10 436.698 38.2237   2
   0   4  10 406.602 63.2859   5
   0  -4 -10 400.240 35.7567   2
   0  -4 -10 408.130 53.2379  13
   0   4  10 355.875 61.4058  11
   0   4 -10 476.621 54.2565  13
   0  -4 -10 483.619 63.0287   9
   0  -4 -10 446.945 48.2739  10
   0  -4  10 424.843 41.4773   9
   0   4  10 434.755 63.4664   9
   0  -4  11 469.139 43.7101   5
   0   4 -11 438.986 44.1959   5
   0   4  11 580.670 71.0500   7
   0  -4  11 586.181 53.4007   6
   0  -4 -11 580.360 37.9250   2
   0   4  11 495.295 42.3963   4
   0  -4  11 494.769 37.6225   2
   0   4 -11 473.509 42.1923   4
   0   4  11 502.938 68.9616   5
   0   4  11 427.636 64.7947  11
   0  -4 -11 545.990 58.7851  13
   0  -4 -11 542.984 54.7830  10
   0   4 -11 486.038 55.9142  13
   0  -4  11 539.468 46.9707   9
   0  -4 -11 422.757 65.0249   9
   0   4  11 566.858 71.1162   9
   0   4  12 198.891 62.6042   7
   0  -4  12 206.710 40.4597   5
   0  -4  12 190.001 47.3788   6
   0  -4 -12 163.009 31.5713   1
   0  -4  12 298.110 32.1002   1
   0   4  12 297.655 64.9212   5
   0  -4 -12 266.381 53.3570  13
   0   4  12 279.080 63.6511  11
   0   4 -12 290.577 52.4045  13
   0  -4  12 253.705 57.8197  10
   0  -4 -12 250.816 52.1695  10
   0  -4  12 267.561 43.3131   9
   0  -4 -12 335.351 66.2954   9
   0   4  12 284.861 67.2685   9
   0   4  13 1106.60 87.2089   5
   0   4  13 1043.50 87.0086   7
   0  -4  13 1107.32 69.7889   6
   0  -4  13 1084.15 60.3710   5
   0  -4 -13 985.493 42.7776   1
   0  -4  13 1102.04 42.9946   1
   0  -4 -13 1190.14 75.8046  13
   0  -4  13 1197.56 80.0869  10
   0  -4 -13 1122.52 72.5532  10
   0   4  13 1150.14 89.7005  11
   0   4 -13 1320.94 77.0184  13
   0   4  13 1268.71 91.1569   9
   0  -4 -13 1352.71 90.5835   9
   0  -4  13 1089.37 62.3775   9
   0  -4  14 68.1663 50.0046   6
   0   4  14 59.4237 69.8813   7
   0  -4  14 2.04964 41.5770   5
   0  -4 -14 82.2370 20.8716   3
   0  -4 -14 55.5752 20.7652   1
   0  -4  14 75.5491 19.4149   1
   0  -4  14 54.5912 20.0906   3
   0   4  14 40.7188 65.9688   5
   0  -4  14 58.7876 19.7635   1
   0  -4 -14 71.0495 20.4725   1
   0   4 -14-23.5366 49.7360  13
   0   4  14 22.9479 65.6094  11
   0  -4 -14 132.484 54.2949  13
   0  -4  14 50.9045 46.2682   9
   0  -4  14 113.662 62.9076  10
   0  -4 -14-12.7048 66.9566   9
   0  -4 -14 18.6358 54.1148  10
   0  -4  15 311.740 57.0706   6
   0  -4  15 368.948 50.6937   5
   0   4  15 326.632 76.6411   7
   0   4  15 250.890 73.7787   5
   0   4 -15 288.329 57.0794  13
   0  -4 -15 428.298 61.5856  13
   0  -4  15 337.974 52.7580   9
   0  -4 -15 270.587 74.4935   9
   0  -4 -15 250.537 61.8347  10
   0   4  16 199.043 78.5938   7
   0  -4  16 144.980 54.5172   6
   0   4 -16 201.491 53.5939  13
   0  -4 -16 243.361 57.4001  13
   0  -4 -16 134.544 77.5822   9
   0  -5   0 5.53278 34.1541   7
   0   5   0 15.2219 32.0126   4
   0   5   0-1.94078 25.2990  11
   0   5   0 10.9266 34.9026  13
   0   5   0-1.93743 26.4790  12
   0  -5   0 33.2003 25.5136  11
   0  -5   1 3898.55 122.408   7
   0   5  -1 3734.83 123.532   6
   0  -5  -1 3972.00 125.890   7
   0   5   1 3851.41 124.886   4
   0   5  -1 3839.43 110.930  12
   0   5   1 3833.89 115.969  11
   0  -5   1 3601.24 112.067  11
   0   5  -1 3867.12 112.201  11
   0  -5  -1 4021.57 118.200  11
   0  -5  -1 3886.98 123.364   9
   0   5  -2 2203.16 83.7051   6
   0   5  -2 2054.35 77.8919   5
   0  -5   2 2171.14 83.9049   7
   0  -5  -2 2145.39 87.6762   7
   0  -5   2 2155.02 84.2020   2
   0   5   2 2095.25 85.2984   4
   0  -5  -2 2020.99 79.7083  11
   0  -5   2 2132.96 89.8513  13
   0   5  -2 2113.32 71.1214  12
   0  -5   2 2110.15 73.7813  11
   0  -5  -2 2080.02 85.0055   9
   0  -5   3 1196.03 62.3065   7
   0   5  -3 1255.37 63.6969   6
   0  -5  -3 1139.44 66.3689   7
   0   5  -3 1426.24 59.3840   5
   0  -5   3 1377.27 65.9723   2
   0   5   3 1206.07 65.0406   4
   0   5  -3 1275.16 51.0476  12
   0  -5   3 1300.09 54.0627  11
   0  -5   3 1308.51 70.0179  13
   0  -5  -3 1394.45 64.4523  11
   0  -5  -3 1215.15 66.6674   9
   0   5  -4 4153.63 121.225   5
   0  -5   4 4397.19 132.181   7
   0   5  -4 4085.04 129.284   6
   0  -5   4 4308.86 134.370   2
   0   5  -4 4268.81 136.619   4
   0   5   4 4173.72 135.000   4
   0  -5  -4 4403.95 145.115  13
   0  -5   4 4408.16 139.976  13
   0  -5   4 4345.00 121.380  11
   0  -5   4 4412.32 120.950  12
   0   5   4 4028.34 132.977  11
   0  -5  -4 4187.74 134.885  11
   0   5  -4 4189.07 142.892  13
   0  -5  -4 4345.58 141.023   7
   0  -5  -4 4041.38 138.971   9
   0   5   5 577.908 53.2427   7
   0   5  -5 512.892 36.5434   5
   0  -5   5 521.957 47.1837   6
   0   5  -5 536.809 45.6717   6
   0  -5   5 494.923 46.2260   7
   0  -5   5 523.761 45.6511   2
   0   5  -5 483.372 45.7549   4
   0   5   5 431.229 46.1040   4
   0  -5   5 537.344 37.0180  12
   0  -5   5 448.827 35.8588  11
   0   5  -5 542.085 54.3555  13
   0  -5   5 432.732 47.7282  13
   0  -5  -5 488.333 55.2846  13
   0  -5   5 505.041 36.8529   9
   0  -5  -5 432.462 52.5581   9
   0   5   5 495.021 23.0838   8
   0   5   6 1049.41 68.6512   7
   0   5  -6 1022.51 47.2667   5
   0  -5   6 1030.63 61.4948   6
   0  -5   6 997.876 57.2081   7
   0   5  -6 1113.71 62.3424   4
   0   5   6 979.710 60.2455   4
   0  -5   6 964.794 58.4232   2
   0  -5   6 1073.74 49.8610  12
   0  -5  -6 1036.20 69.8146  13
   0   5  -6 1120.67 69.3091  13
   0  -5   6 1036.43 61.4440  13
   0   5   6 1022.87 39.9140   8
   0  -5   6 1039.27 47.6772   9
   0  -5  -6 1014.12 66.5613   9
   0   5  -7 21.9968 27.8933   5
   0   5   7-7.80717 46.6907   7
   0  -5   7 50.8063 37.2290   7
   0  -5   7-2.72226 36.9576   6
   0   5   7 5.75424 35.7415   4
   0  -5   7 58.1552 36.4709   2
   0   5  -7 23.6764 37.7927   4
   0  -5   7 33.7874 37.5055  13
   0   5  -7 30.0897 41.9381  13
   0  -5  -7 33.9680 44.0461  13
   0  -5   7 26.1323 31.9190  12
   0  -5  -7-36.4575 36.4723  10
   0  -5   7 37.1659 27.7846   9
   0  -5   8 8690.65 237.872   6
   0   5   8 8640.41 256.057   7
   0   5  -8 8727.13 221.214   5
   0  -5   8 8740.85 234.031   2
   0   5   8 8987.98 239.818   4
   0   5  -8 8886.95 241.773   4
   0   5  -8 8890.93 252.931  13
   0  -5  -8 8936.80 253.532  13
   0  -5   8 8833.77 237.712  13
   0  -5  -8 8817.59 231.431  10
   0  -5   8 8531.36 228.115  12
   0  -5  -8 8994.62 251.704   7
   0  -5   8 8952.31 223.018   9
   0   5  -9 1460.84 58.8846   5
   0   5   9 1390.17 89.4726   7
   0  -5   9 1621.38 75.8756   6
   0   5  -9 1512.12 73.5748   4
   0  -5   9 1309.98 66.4470   2
   0   5   9 1372.05 71.5041   4
   0   5   9 1369.52 86.5144  11
   0   5  -9 1394.98 81.0402  13
   0  -5  -9 1426.46 82.9978  13
   0  -5   9 1323.87 65.3474  12
   0  -5  -9 1411.78 68.1023  10
   0  -5   9 1394.50 60.2145   9
   0  -5  10 664.169 58.6870   6
   0  -5  10 612.300 48.9051   5
   0   5  10 657.238 72.1759   7
   0   5 -10 632.159 45.0529   5
   0  -5  10 623.566 50.2719   2
   0   5  10 702.849 55.1332   4
   0   5 -10 614.886 55.4420   4
   0  -5 -10 718.388 56.8057  10
   0  -5 -10 683.164 65.5590  13
   0   5 -10 783.974 67.3570  13
   0  -5  10 514.014 51.7443  12
   0   5  10 734.952 74.1653  11
   0  -5  10 622.531 46.0294   9
   0  -5 -10 703.361 75.7132   9
   0  -5  11 2288.55 92.7093   6
   0   5  11 2310.02 113.853   5
   0   5  11 2317.34 113.433   7
   0  -5  11 2109.05 81.7652   5
   0   5 -11 2099.45 87.0078   4
   0  -5  11 2237.96 80.9641   2
   0   5  11 2077.76 87.8263   4
   0  -5 -11 2159.01 103.259  13
   0   5 -11 2340.44 104.862  13
   0  -5 -11 2342.49 89.8080  10
   0   5  11 2181.31 110.249  11
   0  -5  11 2120.02 88.2946  12
   0  -5  11 2140.15 81.2506   9
   0  -5 -11 2103.05 110.111   9
   0  -5  12 1009.81 66.7530   6
   0   5  12 873.308 84.7913   7
   0   5  12 993.206 88.4026   5
   0  -5  12 782.337 56.2494   5
   0   5 -12 957.028 59.0739   4
   0   5  12 960.846 59.2176   4
   0   5 -12 971.744 74.3029  13
   0  -5 -12 938.647 66.9888  10
   0  -5  12 1035.37 66.0565  12
   0  -5 -12 838.234 74.3953  13
   0   5  12 1000.39 83.7729  11
   0  -5 -12 1008.71 83.5244   9
   0  -5  12 992.993 56.7636   9
   0  -5  13 6.18560 42.7218   5
   0   5  13 48.1676 68.3385   7
   0  -5  13 108.945 49.8332   6
   0  -5  13 55.6210 34.9516   1
   0   5  13 31.4878 69.6017   5
   0   5  13 74.5227 65.2575  11
   0   5 -13 95.9207 55.3680  13
   0  -5 -13 133.392 58.4529  13
   0  -5  13 165.959 51.8995  12
   0  -5  13 83.7847 43.4188   9
   0  -5 -13 88.9851 52.6241  10
   0  -5 -13 121.417 72.3404   9
   0  -5  13 111.058 63.0738  10
   0  -5  14 154.475 52.4271   6
   0  -5  14 164.862 46.6740   5
   0   5  14 172.103 74.2403   7
   0  -5 -14 172.768 33.8899   1
   0   5  14 247.989 78.7301   5
   0  -5  14 135.859 33.2597   1
   0  -5 -14 163.129 61.8894  13
   0  -5  14 121.480 55.1756  12
   0   5 -14 143.539 57.0795  13
   0  -5 -14 108.507 55.5048  10
   0  -5  14 187.357 46.6878   9
   0  -5 -14 387.553 79.5294   9
   0  -5  15 614.488 64.1089   6
   0   5  15 380.249 81.7370   7
   0  -5 -15 375.145 31.0026   1
   0  -5 -15 424.081 31.2019   3
   0  -5 -15 366.683 31.9574   1
   0   5 -15 549.032 68.2696  13
   0  -5  15 578.642 68.2395  12
   0  -5 -15 651.768 72.5975  13
   0  -5 -15 434.796 84.3459   9
   0  -5 -15 611.652 71.8474  10
   0  -6   0 189.175 46.6546   7
   0   6   0 189.859 45.6176   7
   0   6   0 143.694 48.4705   6
   0   6   0 171.526 43.6738   4
   0  -6   0 229.910 44.6242   2
   0   6   0 229.361 46.8280  13
   0  -6   0 199.024 37.2275  11
   0  -6   0 184.589 47.3835  13
   0   6   0 101.277 33.0081  12
   0  -6   0 256.471 48.8568   9
   0  -6  -1 4387.72 146.337   7
   0  -6   1 4537.66 144.968   7
   0   6  -1 4366.62 144.519   6
   0  -6   1 4513.99 145.651   2
   0   6   1 4487.38 147.765   4
   0   6  -1 4230.72 128.756  12
   0  -6  -1 4685.74 138.258  11
   0   6   1 4257.62 134.243  12
   0  -6   1 4667.99 154.435  13
   0  -6   1 4362.30 132.803  11
   0  -6  -1 4403.15 153.471  13
   0  -6  -1 4292.54 143.033   9
   0  -6  -2 2740.31 108.791   7
   0   6  -2 2761.70 104.056   6
   0  -6   2 2769.89 104.108   7
   0   6   2 2566.45 106.842   4
   0  -6   2 2772.89 106.061   2
   0   6   2 2770.04 99.0841  11
   0   6  -2 2680.76 89.4489  12
   0  -6   2 2819.82 113.548  13
   0  -6  -2 2607.69 99.1029  11
   0  -6   2 2858.48 93.6955  11
   0  -6  -2 2685.60 106.393   9
   0  -6   3 2818.89 105.163   7
   0  -6  -3 2621.04 109.155   7
   0   6  -3 2894.31 106.612   6
   0  -6  -3 2798.26 106.167   2
   0   6  -3 2393.31 105.640   4
   0   6   3 2672.66 106.932   4
   0  -6   3 2941.53 107.397   2
   0  -6  -3 2864.18 104.494  11
   0  -6   3 2776.57 92.7363  11
   0   6   3 2748.31 101.958  11
   0   6  -3 2614.35 87.1605  12
   0  -6   3 2673.57 110.499  13
   0  -6  -3 2928.73 112.180   9
   0   6   4 3548.22 131.626   7
   0  -6   4 3663.47 121.826   7
   0   6  -4 3693.10 120.705   6
   0   6   4 3144.81 121.851   4
   0  -6  -4 3588.95 124.492   2
   0   6  -4 3496.42 125.632   4
   0  -6   4 3480.09 122.791   2
   0   6   4 3582.82 122.152  11
   0  -6   4 3646.36 129.823  13
   0  -6  -4 3446.57 123.289  11
   0   6  -4 3435.88 134.851  13
   0  -6  -4 3583.35 134.870  13
   0  -6   4 3350.35 107.753  11
   0  -6  -4 3349.14 128.489   7
   0  -6  -4 3600.42 130.665   9
   0   6   5 597.060 61.8559   7
   0  -6  -5 568.845 63.2920   7
   0  -6   5 695.787 57.1365   7
   0   6  -5 647.969 52.5321   6
   0  -6   5 580.992 54.6090   2
   0  -6  -5 576.669 54.0934   2
   0   6  -5 655.205 55.2225   4
   0   6   5 710.268 61.7156   4
   0  -6  -5 676.666 66.0621  13
   0  -6   5 550.853 42.8923  11
   0   6  -5 543.224 60.5411  13
   0   6   5 615.345 57.1710  11
   0  -6   5 598.516 44.3521  12
   0  -6   5 585.685 61.6589  13
   0  -6   5 681.744 45.8363   9
   0  -6  -5 729.210 65.2005   9
   0   6   6 5483.76 177.686   7
   0  -6   6 5798.79 162.284   7
   0   6  -6 5556.56 157.015   6
   0   6   6 5607.45 169.544   4
   0  -6  -6 5421.89 163.653   2
   0  -6   6 5623.04 165.102   2
   0   6  -6 5264.99 168.549   4
   0  -6   6 5285.72 147.860  11
   0   6  -6 5418.74 177.955  13
   0  -6  -6 5430.49 177.741  13
   0  -6   6 5507.00 168.597  13
   0   6   6 5580.40 169.926  11
   0  -6   6 5544.18 148.113  12
   0  -6  -6 5777.71 178.011   9
   0  -6   6 5643.90 147.061   9
   0  -6   7 2175.82 90.3333   7
   0   6   7 2262.35 107.879   7
   0  -6   7 2179.27 92.5116   6
   0   6  -7 2223.66 96.6497   4
   0  -6  -7 1907.97 88.4096   2
   0   6   7 2077.70 93.7357   4
   0  -6   7 1970.86 88.6109   2
   0  -6  -7 2010.67 103.042  13
   0  -6   7 1938.19 76.3095  11
   0  -6   7 2031.32 92.6748  13
   0   6  -7 2091.21 103.681  13
   0  -6   7 2100.76 77.9071  12
   0  -6  -7 2068.06 104.738   9
   0   6   7 1961.73 61.1764   8
   0  -6   7 2126.93 75.5519   9
   0  -6  -8 333.668 65.5416   7
   0  -6   8 266.689 53.6094   6
   0   6   8 312.413 67.6270   7
   0  -6   8 360.478 50.4528   7
   0  -6   8 357.552 50.9847   2
   0   6  -8 415.365 54.4940   4
   0  -6  -8 337.127 49.1040   2
   0   6   8 311.665 52.2052   4
   0  -6   8 395.936 52.1350  13
   0  -6   8 396.513 43.0080  12
   0  -6  -8 443.196 62.7214  13
   0   6  -8 452.705 63.5282  13
   0  -6   8 387.035 40.4762   9
   0   6   8 352.766 31.2801   8
   0  -6  -8 286.593 47.5029  10
   0  -6   9 224.608 50.0716   7
   0   6   9 262.024 66.8392   7
   0  -6   9 241.344 53.9836   6
   0  -6  -9 275.298 63.9000   7
   0   6   9 232.804 51.0578   4
   0   6  -9 138.955 49.3324   4
   0  -6   9 187.409 47.8602   2
   0  -6  -9 290.043 48.5450   2
   0   6  -9 211.882 58.5742  13
   0  -6  -9 293.199 62.5352  13
   0  -6   9 177.078 43.7648  12
   0  -6   9 272.777 50.2464  13
   0  -6  -9 197.721 47.8874  10
   0   6   9 159.635 33.3175   8
   0  -6   9 187.154 38.7912   9
   0   6  10 1726.25 105.478   7
   0  -6  10 1990.41 91.0608   6
   0  -6  10 1794.68 85.4312   7
   0   6 -10 1971.52 90.8508   4
   0  -6 -10 1834.17 81.4431   2
   0  -6  10 1862.48 82.9813   2
   0   6  10 1852.90 88.9459   4
   0  -6  10 1715.18 79.2203  12
   0  -6 -10 1924.74 83.6577  10
   0   6 -10 1788.66 97.5022  13
   0  -6 -10 1777.64 99.2809  13
   0  -6  10 1967.86 74.0427   9
   0  -6  11 981.425 67.4813   7
   0  -6  11 1135.99 73.6710   6
   0   6  11 1001.44 91.3097   7
   0   6  11 991.930 70.0106   4
   0  -6 -11 1112.43 63.9225   2
   0   6 -11 1000.37 71.7484   4
   0  -6  11 1021.29 64.3305   2
   0  -6 -11 1045.66 82.4257  13
   0   6  11 1070.84 85.6916  11
   0  -6 -11 1270.13 70.4227  10
   0   6 -11 1056.99 81.7225  13
   0  -6  11 1076.76 66.0956  12
   0  -6  11 1095.17 59.3543   9
   0  -6 -11 1109.64 93.0774   9
   0   6  12 1552.09 105.854   5
   0  -6  12 1364.52 77.4253   7
   0   6  12 1320.02 100.339   7
   0  -6  12 1232.97 78.0591   6
   0   6 -12 1539.27 79.6325   4
   0   6  12 1370.46 77.6675   4
   0  -6  12 1540.70 70.2922   2
   0  -6 -12 1377.39 67.1666   2
   0   6  12 1421.71 97.3952  11
   0  -6 -12 1361.26 76.7299  10
   0  -6  12 1264.04 74.4107  12
   0  -6 -12 1469.49 92.0774  13
   0   6 -12 1407.38 92.2857  13
   0  -6  12 1365.33 66.6918   9
   0  -6 -12 1373.56 101.597   9
   0  -6  13 584.072 60.0704   7
   0  -6  13 535.032 64.6972   6
   0   6  13 621.647 85.8259   7
   0  -6  13 533.861 50.8735   1
   0  -6 -13 384.493 50.0401   1
   0   6 -13 610.213 56.3771   4
   0  -6 -13 564.021 72.4159  13
   0  -6  13 465.712 61.9031  12
   0   6 -13 586.081 72.5038  13
   0  -6 -13 615.910 66.5545  10
   0  -6 -13 633.402 85.2497   9
   0  -6  13 423.372 50.5218   9
   0  -6  14-15.1587 56.2497   6
   0   6  14 57.8920 79.7973   7
   0  -6  14 75.5254 53.6589   7
   0  -6 -14-10.5525 40.1804   1
   0  -6 -14 72.6056 64.0499  13
   0   6 -14 29.5303 59.5545  13
   0  -6  14 33.3865 57.5259  12
   0  -6 -14 24.4461 73.6263   9
   0  -6 -14 47.9666 59.8716  10
   0  -7   0 59.7896 50.2956   7
   0   7   0 39.4630 45.3673   7
   0   7   0 27.1991 55.0217   6
   0   7   0-48.1922 45.8874   4
   0  -7   0-56.0864 49.1848   2
   0  -7   0-27.6224 54.0918  13
   0   7   0-15.0720 37.6176  12
   0  -7   0 36.7072 38.7825  11
   0   7   0-2.54535 37.6900  11
   0  -7   0-7.12439 49.3300   9
   0   7   1 4201.79 150.079   6
   0   7  -1 4083.76 144.537   6
   0   7   1 4097.04 145.068   7
   0  -7   1 3976.97 142.921   7
   0  -7  -1 4066.14 146.291   7
   0   7   1 4036.95 146.041   4
   0  -7   1 4029.27 144.507   2
   0   7  -1 4036.45 126.282  12
   0  -7   1 4176.50 153.544  13
   0  -7  -1 4173.03 157.612  13
   0  -7   1 4181.54 131.846  11
   0  -7  -1 4191.06 135.740  11
   0   7   1 4100.94 133.333  11
   0   7   1 4012.21 132.054  12
   0  -7  -1 4192.86 145.178   9
   0  -7   1 4096.91 140.357   9
   0  -7  -2 6712.14 208.441   7
   0   7  -2 7624.74 209.013   6
   0  -7   2 6948.27 204.955   7
   0   7  -2 6788.02 196.432   5
   0   7   2 6572.77 206.015   4
   0  -7   2 6590.51 204.211   2
   0   7  -2 6454.78 183.753  12
   0  -7   2 7075.84 215.387  13
   0   7   2 6635.98 195.910  12
   0  -7   2 6835.54 190.031  11
   0  -7  -2 6666.53 196.953  11
   0   7   2 6825.04 196.690  11
   0  -7  -2 6670.07 206.532   9
   0   7  -3 2.75031 40.6818   5
   0   7  -3 20.6406 52.4521   6
   0  -7  -3 96.3900 57.2358   7
   0  -7   3 31.4401 50.1681   7
   0  -7   3 18.2233 48.2141   2
   0  -7  -3 80.8845 50.0900   2
   0   7  -3 32.7487 54.0533   4
   0   7   3 121.193 53.9130   4
   0  -7  -3 26.4204 42.9836  11
   0   7  -3 39.6741 54.0392  13
   0  -7   3 82.7007 38.8948  11
   0   7   3-6.26245 43.6574  11
   0   7  -3 79.0012 35.8177  12
   0  -7   3 77.6462 54.6673  13
   0  -7  -3 55.2220 52.5489   9
   0  -7   4-6.90167 48.2583   7
   0   7  -4 6.50512 47.1975   6
   0  -7  -4 32.8014 52.0573   7
   0   7  -4 70.5069 42.0843   5
   0   7  -4 94.8429 50.7056   4
   0   7   4 24.3456 49.4801   4
   0  -7  -4-29.1212 50.1682   2
   0  -7   4 7.21687 48.9896   2
   0   7   4 66.7656 48.0804  11
   0  -7   4 58.5763 36.8123  11
   0  -7  -4 28.3680 53.3777  13
   0   7  -4 42.1240 33.0804  12
   0  -7   4-25.2869 54.6368  13
   0   7  -4 89.3475 52.7858  13
   0  -7  -4 31.8251 46.5208  11
   0  -7  -4-4.12436 54.8421   9
   0   7   5 497.361 67.6231   7
   0  -7   5 445.702 58.3396   7
   0  -7  -5 430.575 64.6807   7
   0   7  -5 607.328 50.4447   5
   0   7  -5 481.176 57.9109   6
   0   7  -5 546.940 65.6852   4
   0   7   5 451.327 59.4894   4
   0  -7   5 512.878 62.4539   2
   0  -7  -5 452.095 60.4911   2
   0   7  -5 557.052 68.1786  13
   0   7   5 434.006 58.7267  11
   0  -7   5 477.553 45.2068  11
   0  -7  -5 477.102 70.2917  13
   0  -7   5 462.953 63.6595  13
   0  -7  -5 431.709 68.2856   9
   0   7  -6 1060.66 59.0238   5
   0   7   6 1060.33 84.9290   7
   0   7  -6 1091.06 69.4581   6
   0  -7   6 1045.21 73.4345   7
   0  -7  -6 1053.09 73.6118   2
   0  -7   6 1014.57 73.6070   2
   0   7  -6 858.423 75.1854   4
   0   7   6 1099.31 79.9169   4
   0  -7  -6 1060.49 83.0404  13
   0  -7   6 1008.83 57.6736  11
   0  -7   6 1031.68 75.4751  13
   0   7  -6 1052.70 81.9127  13
   0   7   6 1053.52 76.1212  11
   0  -7  -6 1231.61 85.7727   9
   0  -7  -6 999.526 81.7683   7
   0  -7   6 1019.93 59.1228   9
   0  -7   7 769.972 66.4605   7
   0   7  -7 768.137 51.5237   5
   0   7   7 764.973 79.0398   7
   0  -7   7 690.036 66.3223   2
   0   7  -7 758.523 73.4853   4
   0   7   7 616.770 67.6281   4
   0  -7  -7 677.338 66.6527   2
   0  -7   7 658.419 50.9474  11
   0   7  -7 713.677 77.3747  13
   0  -7   7 745.311 51.5742  12
   0  -7  -7 649.900 75.0471  13
   0   7   7 701.063 72.1127  11
   0  -7   7 683.604 67.4322  13
   0  -7  -7 759.908 80.4930   9
   0  -7   7 757.394 53.1502   9
   0   7  -8 253.654 41.7819   5
   0  -7   8 216.587 54.8520   7
   0   7   8 64.5398 64.2865   7
   0  -7   8 300.550 56.4939   2
   0   7   8 255.144 61.3677   4
   0   7  -8 219.933 59.0591   4
   0  -7  -8 263.916 56.1174   2
   0  -7   8 203.904 42.8947  11
   0   7  -8 219.586 62.5414  13
   0  -7   8 260.735 57.8605  13
   0  -7  -8 231.866 66.1830  13
   0   7   8 237.941 63.8917  11
   0  -7   8 191.548 41.9888  12
   0   7   8 163.051 21.9827   8
   0  -7   8 298.752 44.3527   9
   0  -7  -8 75.5055 66.1525   9
   0  -7   9 32.5485 52.4146   7
   0   7  -9 51.2508 37.7510   5
   0  -7  -9 67.2729 61.7089   7
   0   7   9 158.267 72.4136   7
   0   7  -9-15.6609 54.0505   4
   0   7   9 23.1600 54.4973   4
   0  -7  -9 63.0173 50.0639   2
   0  -7   9-19.3140 48.7486   2
   0  -7   9 72.1439 50.1489  13
   0   7   9 4.37621 55.1322  11
   0  -7   9 68.2569 42.3748  12
   0   7  -9 159.330 65.9736  13
   0  -7  -9-28.9990 61.6021  13
   0  -7   9 38.8421 40.5522  11
   0  -7  -9-38.3247 51.8477  10
   0  -7   9 67.9408 40.0909   9
   0   7   9 53.3293 26.8760   8
   0  -7  10 1692.30 92.9924   6
   0   7 -10 1794.44 70.8439   5
   0  -7  10 1752.64 88.3236   7
   0   7  10 1649.97 110.732   7
   0   7  10 1874.73 96.0875   4
   0  -7  10 1859.82 88.8183   2
   0  -7 -10 1895.21 87.2892   2
   0   7 -10 1845.71 97.6702   4
   0  -7 -10 1690.41 82.0376  10
   0  -7  10 1618.44 75.3612  11
   0  -7  10 1774.77 79.6326  12
   0   7 -10 1737.29 106.055  13
   0  -7 -10 1999.73 108.351  13
   0  -7  10 1908.87 75.1179   9
   0   7  10 1568.67 62.3369   8
   0   7 -11 17.4333 39.8673   5
   0  -7  11 20.6881 55.3354   6
   0  -7  11 54.0562 55.7651   7
   0   7  11 21.4364 73.5005   7
   0  -7  11 66.3487 52.3120   2
   0   7  11 69.6977 57.1290   4
   0   7 -11 77.6173 58.4437   4
   0  -7 -11 80.5147 51.0138   2
   0   7 -11 113.296 65.3959  13
   0  -7 -11 33.6983 66.4656  13
   0  -7  11 130.541 48.9871  12
   0  -7  11 14.3254 43.4690  11
   0  -7 -11 133.737 54.4500  10
   0  -7  11 112.150 43.2826   9
   0   7 -12 157.796 43.6282   5
   0  -7  12 220.592 62.0525   6
   0   7  12 54.6247 78.6473   7
   0  -7  12 103.219 55.9698   7
   0  -7  12 267.983 51.6437   2
   0  -7 -12 223.268 48.0773   2
   0   7  12 136.644 59.8465   4
   0   7 -12 214.594 58.3259   4
   0  -7  12 127.261 52.1175  12
   0  -7 -12 205.560 72.4908  13
   0   7 -12 136.343 66.6670  13
   0   7  12 145.613 42.5926   8
   0  -7  12 149.030 44.9220   9
   0  -7 -12 199.259 79.5385   9
   0  -7 -12 307.324 60.3561  10
   0   7 -13 94.1345 42.5703   5
   0  -7  13 67.8989 57.1136   7
   0   7  13 66.6037 82.1933   7
   0  -7  13 29.8799 58.3318   6
   0   7  13 38.9975 56.1671   4
   0  -7  13-8.52909 50.6545   1
   0  -7 -13-36.1538 51.5188   1
   0   7 -13 65.4118 56.6444   4
   0   7 -13 57.3555 64.7825  13
   0  -7 -13 132.219 69.1297  13
   0   7  13 23.4330 45.0662   8
   0  -7 -13 80.1249 57.8208  10
   0  -7 -13 165.032 81.0184   9
   0   8   0 12862.7 342.983   6
   0  -8   0 12315.3 340.091   7
   0   8   0 11687.0 344.035   4
   0  -8   0 12534.6 339.862   2
   0  -8   0 12441.5 324.755  11
   0  -8   0 12379.2 351.296  13
   0   8   0 12263.2 318.815  12
   0   8   0 12692.0 320.953  11
   0  -8   0 11987.7 335.645   9
   0  -8  -1 888.005 77.8289   7
   0  -8   1 748.071 72.5286   7
   0   8  -1 936.143 78.3337   6
   0   8   1 815.190 72.5600   7
   0   8   1 845.212 78.2792   6
   0  -8   1 826.851 73.2577   2
   0   8   1 770.252 78.3596   4
   0  -8  -1 848.820 81.0357  13
   0   8   1 988.108 63.3164  11
   0   8   1 810.650 61.3237  12
   0  -8   1 914.212 81.2581  13
   0  -8   1 892.738 62.8232  11
   0  -8  -1 923.719 67.8384  11
   0   8  -1 937.938 60.0247  12
   0  -8   1 934.026 73.9164   9
   0  -8  -1 813.563 74.1728   9
   0  -8   2 943.722 76.3454   7
   0   8  -2 866.075 78.5792   6
   0  -8  -2 929.665 78.6399   7
   0   8   2 893.826 79.4032   7
   0   8   2 940.816 85.4902   6
   0   8  -2 773.801 69.0873   5
   0   8   2 968.282 81.5090   4
   0  -8   2 831.928 76.8188   2
   0  -8   2 974.530 63.8084  11
   0   8   2 1129.20 71.3373  11
   0   8   2 1046.97 71.4521  12
   0  -8  -2 988.659 70.2127  11
   0   8  -2 919.222 58.4669  12
   0  -8   2 992.879 83.5754  13
   0  -8  -2 908.184 79.0214   9
   0  -8   2 1074.25 76.5117   9
   0  -8   2 801.735 37.3568   8
   0  -8  -3 4519.97 161.387   7
   0   8  -3 4504.47 155.502   6
   0   8  -3 4481.48 143.975   5
   0  -8   3 3990.28 150.606   7
   0  -8  -3 4275.78 155.582   2
   0   8   3 4054.01 157.673   4
   0  -8   3 4092.11 153.523   2
   0   8  -3 3963.32 156.600   4
   0  -8  -3 4079.29 147.625  11
   0   8  -3 4176.09 170.437  13
   0   8   3 4485.23 148.379  11
   0   8   3 4477.65 149.847  12
   0  -8   3 4119.51 136.069  11
   0  -8   3 4373.42 160.959  13
   0   8  -3 4357.74 130.510  12
   0  -8  -3 4242.03 158.126   9
   0  -8   3 4431.80 148.449   9
   0  -8  -4 63.0025 60.2793   7
   0   8  -4 99.4076 50.3742   5
   0  -8   4 73.3693 56.1363   7
   0   8  -4 51.0405 57.7262   6
   0  -8   4 60.2213 57.5799   2
   0   8  -4 75.0698 62.7354   4
   0  -8  -4 56.6188 59.0494   2
   0   8   4 18.5001 56.5374   4
   0   8  -4 104.199 38.7014  12
   0  -8  -4 80.8752 56.8890  11
   0  -8  -4 89.0510 65.0896  13
   0   8  -4 111.640 64.4104  13
   0  -8   4 112.232 62.3090  13
   0  -8   4 50.1530 44.7290  11
   0   8   4 39.4602 53.5976  11
   0  -8  -4 131.259 65.3998   9
   0   8   5 4514.71 174.274   6
   0   8  -5 4484.44 151.984   6
   0   8   5 4021.12 166.402   7
   0  -8   5 4684.70 157.347   7
   0   8  -5 4518.64 140.211   5
   0  -8  -5 4627.71 159.925   2
   0  -8   5 4532.66 158.563   2
   0   8  -5 4289.08 163.668   4
   0   8   5 4220.98 162.102   4
   0  -8  -5 4677.01 172.977  13
   0  -8   5 4452.95 138.039  11
   0   8  -5 4220.97 173.174  13
   0  -8   5 4538.59 163.542  13
   0   8   5 4332.99 155.105  11
   0  -8  -5 4460.34 166.713   7
   0  -8  -5 4270.54 166.072   9
   0   8  -6 173.085 46.6097   5
   0  -8   6 120.356 58.1792   7
   0  -8  -6 164.178 64.3930   7
   0   8   6 141.398 71.9069   7
   0   8  -6 101.774 56.6335   6
   0  -8  -6 183.725 62.6325   2
   0   8   6 104.671 58.2996   4
   0  -8   6 70.3019 59.8542   2
   0   8  -6 111.142 63.5729   4
   0   8  -6 205.657 65.3781  13
   0   8   6 115.483 60.6983  11
   0  -8   6 199.959 46.3448  11
   0  -8   6 137.606 59.9246  13
   0  -8  -6 42.0911 65.9514  13
   0  -8   6 97.7601 48.1053   9
   0  -8  -6 148.864 70.6633   9
   0   8   7 140.411 74.4529   7
   0   8  -7 178.227 56.8044   6
   0   8  -7 55.1338 42.6130   5
   0  -8   7 125.902 57.6676   7
   0  -8  -7-34.1387 57.2162   2
   0  -8   7 95.3288 61.3382   2
   0   8   7 103.639 62.8228   4
   0   8  -7-9.14448 62.1896   4
   0  -8  -7 57.9626 64.6693  13
   0   8  -7 66.5805 67.5250  13
   0  -8   7 55.1188 58.6374  13
   0  -8   7 44.2461 42.0990  11
   0   8   7 58.6819 58.0639  11
   0  -8   7 58.2425 46.0894   9
   0  -8  -7 34.6042 70.6677   9
   0  -8   8 419.849 66.0365   7
   0   8  -8 511.662 51.3311   5
   0   8   8 427.771 80.1874   7
   0  -8  -8 319.342 63.4696   2
   0   8  -8 355.479 72.3692   4
   0   8   8 301.708 69.0997   4
   0  -8   8 453.885 68.2254   2
   0  -8   8 384.363 48.9522  11
   0  -8  -8 417.067 80.6012  13
   0   8  -8 454.116 80.0735  13
   0   8   8 436.668 70.9413  11
   0  -8   8 414.549 66.1959  13
   0  -8  -8 391.169 80.5584   9
   0  -8   8 499.932 53.1407   9
   0  -8   9 1179.19 80.9958   7
   0   8  -9 1253.18 64.0013   5
   0   8   9 1220.80 104.643   7
   0   8  -9 1082.56 85.9891   4
   0  -8  -9 976.099 78.3467   2
   0   8   9 1176.77 88.7621   4
   0  -8   9 1301.38 83.3139   2
   0   8   9 1101.14 91.5304  11
   0  -8  -9 1248.83 99.9590  13
   0  -8   9 1178.54 66.4298  11
   0  -8   9 1453.85 87.1427  13
   0  -8   9 1226.90 67.8727  12
   0   8  -9 1217.65 97.8988  13
   0  -8  -9 988.499 96.2478   9
   0  -8   9 1400.01 68.2506   9
   0  -8  -9 1272.13 100.728   7
   0  -8  -9 1188.63 77.8393  10
   0  -8  10 63.6430 61.4160   7
   0   8  10 11.2117 75.5817   7
   0   8 -10 98.0398 43.5189   5
   0   8 -10-8.64882 63.2076   4
   0  -8 -10 6.64985 56.1170   2
   0   8  10-8.52717 62.5005   4
   0  -8  10 27.6758 58.3879   2
   0  -8 -10-78.7263 71.8485  13
   0  -8  10-31.4621 44.1613  11
   0  -8  10 56.3147 46.1039  12
   0   8 -10-5.47152 69.1921  13
   0  -8 -10-24.5991 56.6222  10
   0  -8  10 42.1349 45.6322   9
   0   8  10 6.39822 15.8369   8
   0   8  11-17.1262 79.5754   7
   0   8 -11 100.296 43.3880   5
   0  -8  11 79.6887 60.4392   7
   0   8 -11 171.758 65.3947   4
   0  -8 -11 28.1117 52.1457   2
   0   8  11 29.0446 63.7664   4
   0  -8  11 35.9667 55.2540   2
   0  -8 -11-15.6382 75.8627  13
   0  -8  11 31.4649 44.0099  11
   0   8 -11-48.6918 71.6861  13
   0  -8 -11 57.0111 58.6137  10
   0   8  11 36.3308 28.3622   8
   0  -8  12 339.345 66.3346   7
   0   8  12 133.270 85.3422   7
   0   8 -12 184.185 46.7261   5
   0   8  12 238.560 67.8150   4
   0   8 -12 248.587 67.3469   4
   0  -8  12 274.049 60.2801   2
   0  -8 -12 297.599 58.6110   2
   0  -8  12 133.401 48.3551  11
   0   8 -12 340.836 79.9184  13
   0   8  12 163.014 34.9607   8
   0  -8 -12 302.769 92.2905   9
   0  -8 -12 392.491 64.2109  10
   0   9   0 18.7545 67.3184   6
   0  -9   0-23.0986 63.0314   7
   0  -9   0 53.9976 62.2139   2
   0   9   0-31.5867 68.3701   4
   0   9   0 46.9831 49.3979  12
   0  -9   0 54.4651 51.2612  11
   0  -9   0-5.44210 65.2324  13
   0  -9   0-12.9214 61.7473   9
   0   9   1-9.72129 69.6968   6
   0  -9  -1 74.5485 64.5394   7
   0  -9   1 117.278 66.7123   7
   0   9  -1 7.79771 59.0512   5
   0   9  -1 18.1319 67.1375   6
   0   9   1 47.2251 65.1949   4
   0  -9   1 130.284 66.5390   2
   0  -9  -1 153.804 71.6158  13
   0  -9  -1 35.4728 54.0215  11
   0   9   1 105.297 53.6953  11
   0  -9   1 149.950 66.5375  13
   0   9  -1 16.2671 47.7931  12
   0   9   1 98.4611 51.2829  12
   0  -9   1 58.6936 52.0131  11
   0  -9   1 33.5199 61.2597   9
   0  -9  -1 62.1364 67.3998   9
   0  -9   2 415.333 73.9288   7
   0   9  -2 295.116 64.3982   5
   0   9  -2 469.199 73.3135   6
   0  -9  -2 287.270 68.8000   7
   0   9   2 277.124 77.3436   6
   0   9   2 314.356 70.2321   7
   0   9   2 349.470 76.4599   4
   0  -9   2 361.026 69.5767   2
   0  -9   2 406.412 58.4065  11
   0  -9   2 342.423 73.8894  13
   0   9   2 440.800 64.0270  12
   0  -9  -2 339.746 62.6539  11
   0   9  -2 288.858 50.1009  12
   0   9   2 406.033 62.9508  11
   0  -9   2 248.247 22.9986   8
   0  -9   2 386.353 70.6356   9
   0  -9  -2 325.509 69.4988   9
   0   9   3 754.399 81.9867   7
   0   9  -3 733.692 80.2787   6
   0  -9  -3 824.952 82.4901   7
   0   9   3 966.100 96.9474   6
   0   9  -3 706.388 70.2901   5
   0  -9   3 680.214 77.7319   7
   0   9  -3 655.556 83.2704   4
   0  -9  -3 721.909 81.3860   2
   0   9   3 814.307 89.7140   4
   0  -9   3 798.216 78.6994   2
   0   9   3 837.170 73.2489  11
   0  -9  -3 807.008 92.2550  13
   0  -9   3 886.693 87.1174  13
   0   9  -3 772.655 57.4552  12
   0   9   3 831.605 73.9279  12
   0  -9  -3 837.319 75.5646  11
   0  -9   3 848.135 65.7644  11
   0  -9   3 611.005 38.0114   8
   0  -9   3 677.088 74.2614   9
   0  -9  -3 811.411 84.5495   9
   0  -9   4 697.304 79.0467   7
   0   9  -4 730.970 68.6477   5
   0   9  -4 745.738 78.5766   6
   0  -9  -4 822.495 85.8161   7
   0  -9   4 512.615 74.2027   2
   0   9   4 814.241 88.1267   4
   0   9  -4 645.307 81.5270   4
   0  -9  -4 563.529 73.8138   2
   0  -9  -4 643.536 74.3134  11
   0  -9   4 602.964 59.7182  11
   0   9  -4 720.868 87.6789  13
   0  -9  -4 619.006 87.2090  13
   0   9   4 577.983 71.1280  11
   0   9   4 553.999 73.9800  12
   0  -9   4 766.362 87.1975  13
   0  -9   4 638.628 72.3463   9
   0  -9  -4 633.742 81.6136   9
   0  -9   5 209.173 65.9140   7
   0   9  -5 188.833 64.0162   6
   0  -9  -5 341.776 74.3533   7
   0   9  -5 301.773 55.6058   5
   0  -9  -5 168.907 64.0611   2
   0   9  -5 180.786 67.6480   4
   0  -9   5 138.293 64.4698   2
   0   9   5 245.315 77.5519   4
   0  -9   5 292.770 53.3661  11
   0  -9  -5 97.3563 72.1771  13
   0   9   5 303.469 64.6495  11
   0  -9   5 227.805 73.5096  13
   0   9  -5 233.412 77.0842  13
   0  -9  -5 190.417 73.6347   9
   0  -9   5 230.449 64.2222   9
   0   9  -6 1032.47 79.6933   6
   0  -9   6 1059.87 84.1726   7
   0   9   6 1189.92 100.570   7
   0   9   6 980.057 103.840   6
   0   9  -6 1145.51 70.4184   5
   0  -9  -6 1002.53 87.1496   2
   0   9  -6 954.392 92.1884   4
   0  -9   6 1060.03 85.8859   2
   0   9   6 959.922 89.4462   4
   0   9  -6 832.691 96.4192  13
   0  -9  -6 966.417 96.0210  13
   0  -9   6 977.323 66.7997  11
   0   9   6 922.156 81.5531  11
   0  -9   6 1157.15 89.1912  13
   0  -9   6 1124.26 72.2203   9
   0  -9  -6 1143.34 95.8028   7
   0  -9  -6 972.283 97.3758   9
   0  -9   6 961.489 77.9289   9
   0   9  -7 457.134 67.8864   6
   0  -9   7 439.805 71.2139   7
   0   9  -7 456.036 56.6958   5
   0   9   7 488.705 87.3042   7
   0   9  -7 349.110 78.3399   4
   0  -9   7 453.816 74.6050   2
   0  -9  -7 404.903 72.7389   2
   0   9   7 373.243 74.9404   4
   0  -9   7 542.147 77.0037  13
   0  -9   7 469.976 54.9891  11
   0   9   7 436.142 73.5396  11
   0   9  -7 560.229 86.8562  13
   0  -9   7 616.138 61.5059   9
   0  -9  -7 342.869 84.6480   9
   0  -9   8 1840.68 104.267   7
   0   9  -8 2001.50 86.2859   5
   0   9   8 2042.46 123.316   7
   0   9   8 1967.79 113.863   4
   0  -9  -8 2000.83 105.160   2
   0   9  -8 2279.10 120.819   4
   0  -9   8 2101.04 109.326   2
   0  -9   8 1814.33 85.6339  11
   0   9  -8 2216.77 129.621  13
   0  -9   8 2220.86 88.9485   9
   0  -9  -8 1669.05 117.456   9
   0  -9   9 353.929 71.3449   7
   0   9   9 267.071 85.2869   7
   0   9  -9 402.481 51.1926   5
   0  -9   9 430.061 72.5622   2
   0   9  -9 333.170 78.6811   4
   0  -9  -9 419.720 70.0528   2
   0   9   9 414.870 79.8849   4
   0  -9   9 334.773 53.0587  11
   0   9  -9 384.564 86.5612  13
   0  -9  -9 440.310 68.3926  10
   0  -9   9 388.696 54.7736   9
   0  -9  -9 296.191 87.7648   9
   0  -9  10 270.066 68.7121   7
   0   9  10 206.841 83.7912   7
   0   9 -10 362.034 50.7253   5
   0  -9  10 454.657 72.2881   2
   0  -9 -10 218.090 64.2901   2
   0   9  10 165.191 73.8418   4
   0   9 -10 378.135 83.2940   4
   0  -9  10 189.662 51.1547  11
   0   9 -10 315.120 84.2976  13
   0  -9 -10 205.274 88.9022   9
   0  -9 -10 306.827 67.0742  10
   0  10   0 227.781 75.7636   5
   0  10   0 321.724 81.1523   6
   0 -10   0 310.433 79.3647   7
   0 -10   0 311.976 75.0499   2
   0  10   0 292.520 81.8112   4
   0 -10   0 337.958 64.1721  11
   0  10   0 185.013 57.5618  12
   0 -10   0 162.067 69.3994   9
   0 -10  -1 178.724 74.5668   7
   0  10   1 337.278 88.0586   6
   0 -10   1 220.185 73.0875   7
   0  10  -1 315.655 82.6147   6
   0  10  -1 247.167 72.7784   5
   0  10   1 251.570 78.9012   4
   0 -10   1 177.241 70.3461   2
   0  10  -1 101.578 54.8776  12
   0 -10   1 177.876 58.8205  11
   0  10   1 162.296 58.4519  12
   0 -10  -1 95.2420 59.8385  11
   0 -10   1 193.207 72.2916   9
   0 -10  -1 172.150 72.8205   9
   0  10  -2 1075.10 85.4536   5
   0 -10   2 1114.45 94.9622   7
   0  10  -2 1086.57 94.2994   6
   0 -10   2 964.769 88.7761   2
   0  10   2 1255.72 104.586   4
   0  10  -2 1051.70 68.8162  12
   0  10   2 1149.93 82.5596  11
   0  10   2 1202.30 82.6950  12
   0 -10   2 1059.84 76.3398  11
   0 -10  -2 980.565 83.7933  11
   0 -10   2 1034.70 90.4242   9
   0 -10  -2 1125.26 96.6101   9
   0  10  -3 3422.32 124.897   5
   0  10   3 3023.15 139.089   7
   0  10  -3 3525.84 139.709   6
   0 -10   3 3088.64 135.124   7
   0  10  -3 3101.32 145.703   4
   0 -10   3 3517.69 139.695   2
   0 -10  -3 3184.41 136.679   2
   0  10   3 3160.58 146.150   4
   0  10   3 2846.82 121.093  11
   0 -10  -3 3171.77 130.815  11
   0 -10   3 3230.52 116.181  11
   0  10  -3 2940.34 101.187  12
   0  10   3 3140.95 126.528  12
   0 -10  -3 3097.05 140.903   9
   0 -10   3 3254.31 133.298   9
   0  10   4 32.0082 72.0582   7
   0  10  -4 21.1654 68.4120   6
   0  10  -4 78.9316 59.4566   5
   0 -10   4 129.027 76.7522   7
   0  10  -4 74.0644 78.6482   4
   0 -10  -4-47.0817 71.6840   2
   0 -10   4 122.236 74.9720   2
   0  10   4 123.718 76.0885   4
   0 -10   4-15.5844 51.0372  11
   0  10   4 86.6643 64.5726  11
   0  10   4 45.8418 65.6385  12
   0 -10   4 127.190 69.6348   9
   0 -10  -4 103.876 76.8058   9
   0 -10   4 29.3242 32.6425   8
   0  10  -5 199.453 60.9892   5
   0 -10   5 198.972 77.7686   7
   0  10  -5 181.506 72.3849   6
   0  10   5 139.174 80.9275   4
   0 -10  -5 185.745 74.9853   2
   0 -10   5 46.4629 71.2484   2
   0  10  -5 5.64922 81.1452   4
   0 -10   5 68.5943 53.0252  11
   0  10   5 66.3096 72.1537  12
   0  10   5 95.3715 67.3676  11
   0 -10   5 90.9676 67.0880   9
   0 -10   5 86.6429 38.1305   8
   0 -10  -5 95.6000 80.4525   9
   0  10  -6 133.832 67.3798   6
   0  10  -6 207.020 58.8339   5
   0 -10   6 128.441 72.7404   7
   0 -10   6 118.821 74.0023   2
   0 -10  -6 291.240 77.4541   2
   0  10  -6 95.0347 78.3560   4
   0  10   6 77.0616 78.9727   4
   0 -10   6 174.661 53.5975  11
   0  10   6 84.1344 77.0252  12
   0 -10  -6 119.669 83.2013   9
   0 -10   6 72.4461 67.0544   9
   0 -10   6 116.231 61.0319   9
   0 -10   7 1215.11 94.6389   7
   0  10  -7 1118.68 74.0239   5
   0  10  -7 1232.74 88.8235   6
   0  10   7 1131.90 107.475   7
   0 -10  -7 1177.95 95.4039   2
   0  10   7 938.804 98.4697   4
   0  10  -7 1191.16 103.053   4
   0 -10   7 998.716 93.7985   2
   0 -10   7 1198.84 72.2505  11
   0  10  -7 1294.58 112.030  13
   0 -10  -7 837.133 103.938   9
   0 -10   7 1072.21 75.8652   9
   0 -10   7 995.318 83.8869   9
   0  11   0-118.942 80.1190   5
   0 -11   0-25.4446 77.8889   2
   0  11   0 30.9435 85.1437   4
   0  11   0-75.2085 59.4439  12
   0 -11   0 30.8066 61.7040  11
   0 -11   0 74.0821 77.7770   9
   0  11  -1 167.876 75.8654   5
   0  11   1 81.8161 77.0220   5
   0 -11   1 198.293 82.2484   2
   0  11   1 246.750 87.5720   4
   0 -11   1 194.319 63.4042  11
   0 -11  -1 169.094 66.7051  11
   0  11  -1 147.482 57.2219  12
   0  11   1 129.414 62.8393  12
   0 -11  -1 187.954 82.2720   9
   0 -11   1 234.058 79.0142   9
   0  11  -2 402.791 78.4031   5
   0 -11   2 466.219 84.5287   2
   0  11   2 539.740 97.7594   4
   0 -11  -2 471.952 84.7417   2
   0 -11   2 344.839 68.7560  11
   0  11  -2 358.664 58.4604  12
   0 -11  -2 403.480 75.3003  11
   0  11   2 460.327 72.0369  12
   0 -11  -2 468.170 92.3118   9
   0 -11   2 337.312 82.1097   9
   0  11  -3 353.606 73.5133   5
   0  11   3 231.868 87.1615   4
   0  11  -3 282.899 87.9806   4
   0 -11  -3 145.461 76.9171   2
   0 -11   3 260.440 78.2190   2
   0 -11   3 385.067 66.0648  11
   0  11   3 263.059 70.9658  12
   0  11  -3 248.564 55.0342  12
   0 -11  -3 239.415 84.6416   9
   0 -11   3 303.578 79.3777   9
  -1   0  17 573.732 63.1136   5
  -1   0  17 525.206 67.9277   7
  -1   0  17 443.418 74.9793  11
   1   0 -17 350.708 37.1650  13
  -1   0  17 560.080 70.3252   9
   1   0 -17 594.539 63.8370   9
  -1   0  16 47.7802 51.3703   5
  -1   0  16 3.13179 52.5666   7
  -1   0  16 42.6161 60.0032  11
   1   0 -16-19.5277 31.9016  13
  -1   0  16 29.6299 57.3632   9
  -1   0  16 3.14335 60.8043  10
   1   0 -16 23.8695 51.6019   9
  -1   0  15 1297.70 71.0503   5
  -1   0  15 1251.38 83.3195  11
  -1   0  15 1110.11 78.9246  10
   1   0 -15 1112.33 52.0211  13
  -1   0  15 1214.56 77.8132   9
  -1   0  15 1237.01 75.0130   7
   1   0 -15 1208.28 71.6422   9
  -1   0  14-2.88228 47.0195   7
  -1   0  14 18.7153 43.6780   5
   1   0 -14-33.7762 29.4010  13
  -1   0  14 134.864 56.7988  11
  -1   0  14 122.871 55.4592  10
  -1   0  14-6.00432 49.8298   9
   1   0 -14 20.0269 44.8584   9
  -1   0  13 7179.49 198.490   5
  -1   0  13 7532.67 215.553  11
  -1   0  13 7559.59 207.005  10
   1   0 -13 7119.15 186.092  13
   1   0 -13 7133.23 200.565   9
  -1   0  13 7477.24 207.310   9
  -1   0  13 7280.23 204.332   7
  -1   0  12 40.7587 39.8217   7
  -1   0  12 8.57098 38.2556   5
  -1   0  12 3.14430 44.6027  11
   1   0 -12 47.1222 24.2635  13
   1   0 -12 70.5162 38.7784   9
  -1   0  12 50.0513 44.7117   9
  -1   0  12 32.9406 45.9393  10
  -1   0  11 5089.36 145.936   5
  -1   0  11 5278.63 151.890  10
   1   0 -11 5037.73 147.566   9
  -1   0  11 5158.31 151.692   9
  -1   0  11 4937.58 148.624   7
  -1   0  10 28.2533 30.3663   5
  -1   0  10 29.8683 32.3056   7
   1   0 -10 4.02434 30.9227   9
  -1   0  10 21.7752 36.4704  10
  -1   0  10 11.2396 33.4305   9
  -1   0   9 6296.67 171.462   5
  -1   0   9 6508.73 175.411  10
   1   0  -9 6428.22 172.861   9
  -1   0   9 6459.80 175.208   9
  -1   0   9 6619.65 174.182   7
  -1   0   8 16.8576 24.4954   7
  -1   0   8 30.2689 25.3710   5
   1   0  -8-13.3023 24.0901   9
  -1   0   8-5.39993 25.8828   9
  -1   0   7 1670.04 58.5686   5
   1   0  -7 1648.57 60.7495  10
  -1   0   7 1699.91 60.8130   9
  -1   0   7 1703.39 58.7989   7
   1   0  -7 1648.47 59.4860   9
  -1   0   6 30.2104 20.8272   5
  -1   0   6 62.5696 21.2302   7
   1   0  -6 99.8845 24.6362  10
   1   0  -6 82.9070 22.8190   9
  -1   0   6 67.5611 21.2787   9
  -1   0   5 48450.6 1109.19   5
   1   0  -5 48355.7 1110.95  10
  -1   0   5 48646.5 1109.64   9
  -1   0   5 48102.1 1108.29   7
   1   0  -5 48896.6 1109.19   9
   1   0  -4 33.7438 7.91327   1
  -1   0   4 47.6225 7.91417   1
  -1   0   4 31.2985 7.61686   3
  -1   0   4 22.3194 11.7845   7
   1   0  -4 4.90790 13.8413   9
  -1   0   4 12.4889 13.9798   9
  -1   0   3 1552.02 41.5444   3
  -1   0   3 1658.65 41.5948   1
  -1   0   3 1627.68 47.5388  11
   1   0  -3 1686.61 47.7008  10
  -1   0   3 1653.80 44.3910   7
  -1   0   3 1669.09 45.5490   9
  -1   0   2-2.62241 6.01499   1
  -1   0   2 1.40129 6.27605  11
   1   0  -2 6.54106 7.03567  10
   1   0   1 97.0374 7.08429   1
   1   0   1 85.5680 8.39432   5
  -1   0  -1 97.9154 8.76406   9
   1   0   2 59.2006 7.77023   1
   1   0   2 45.7032 13.6441   5
   1   0   2 48.5098 13.2561   9
   1   0   3 59639.9 1340.86   1
  -1   0  -3 58331.9 1340.91   1
  -1   0  -3 58751.7 1341.00   3
   1   0   3 62405.4 1351.56   5
   1   0   3 59680.9 1352.51   9
   1   0   4 62.6251 20.7471   5
   1   0   4 38.9294 21.6905   9
   1   0   5 1455.54 52.4902   5
  -1   0  -5 1255.96 52.3768   5
   1   0   5 1477.02 48.7311  10
  -1   0  -5 1198.49 50.0386   9
   1   0   5 1376.41 53.9159   9
  -1   0  -6-7.51810 25.4714   5
   1   0   6-7.90353 23.2056   5
  -1   0  -6 22.0830 23.6007   9
   1   0   6 10.7678 24.6089   9
   1   0   6 12.8433 21.6529  10
   1   0   7 11032.5 280.849   5
  -1   0  -7 11566.7 286.129   5
   1   0   7 11263.5 276.794  10
   1   0   7 11222.0 284.237   9
  -1   0  -7 11493.5 282.693   9
   1   0   8 40.5652 32.0470   5
   1   0   8 18.2263 32.9301   9
  -1   0  -8 98.4200 32.1574   9
   1   0   9 10260.9 263.935   5
   1   0   9 10275.8 269.411   9
  -1   0  -9 10438.7 266.084   9
   1   0  10-4.45537 36.5157   5
   1   0  10 55.6986 38.4506  10
  -1   0 -10 46.3680 37.0567   9
   1   0  10 16.3025 40.6938   9
   1   0  11 886.153 56.7757   5
   1   0  11 1041.94 59.6973  10
   1   0  11 823.493 65.4089   9
  -1   0 -11 872.014 59.6321   9
   1   0  12 29.5523 43.9389   5
   1   0  12 3.10405 45.5932   7
   1   0  12 133.827 46.1742  10
  -1   0 -12 168.357 49.1042   9
   1   0  12 6.23691 50.4134   9
   1   0  13-6.55020 49.7462   7
   1   0  13 69.6520 45.2037   5
   1   0  13 75.6961 54.1478   9
  -1   0 -13 2.82357 46.9414   9
   1   0  14 88.6048 50.3799   5
   1   0  14 127.804 58.4487   7
  -1   0 -14 23.2889 51.0616   9
   1   0  14 31.0809 56.9514   9
   1   0  14 102.697 53.3400  10
   1   0  15 1254.17 78.7857   5
  -1   0 -15 1367.49 67.9383  13
   1   0  15 1334.56 80.2424  10
  -1   0 -15 1243.61 81.1375   9
   1   0  15 1298.17 85.9942   7
   1   0  15 1424.26 89.4139   9
   1   0  16 15.0180 59.9509   7
   1   0  16 68.2382 57.3494   5
  -1   0 -16 89.3688 42.7040  13
   1   0  16 111.236 67.8076  11
   1   0  16 37.1328 65.0428   9
   1   0  16 44.5301 60.2903  10
  -1   0 -16-9.13169 57.2985   9
   1   0  17 19.2722 63.4655   7
   1   0  17 43.6140 59.5733   5
  -1   0 -17-4.84963 44.4123  13
   1   0  17-15.2271 68.2132   9
  -1   0 -17 43.1225 59.8310   9
  -1   1  17 368.832 69.2010   7
  -1   1  17 449.772 63.6350   5
  -1  -1  17 426.274 61.6981   7
  -1  -1  17 556.006 59.6368   5
  -1  -1  17 397.069 70.5125  11
   1  -1 -17 482.386 39.3878  13
   1  -1 -17 413.273 42.0704  13
   1   1 -17 353.464 39.5264  13
   1  -1 -17 541.930 68.1511   9
   1   1 -17 495.052 59.4850   9
  -1  -1  17 478.339 65.5091   9
  -1   1  17 476.396 73.3851   9
  -1   1  16 406.971 64.8739   7
  -1  -1  16 349.285 55.1141   5
  -1   1  16 456.788 61.1270   5
  -1  -1  16 355.926 57.9146   7
   1   1 -16 401.623 39.3332  13
   1  -1 -16 375.855 36.8510  13
  -1   1  16 471.238 71.6423  11
  -1  -1  16 499.408 70.2456  11
   1   1 -16 468.999 56.0925   9
   1  -1 -16 427.102 63.8032   9
  -1   1  16 458.713 73.6272  10
  -1  -1  16 391.750 62.7865   9
  -1   1  16 424.634 70.5223   9
  -1  -1  16 478.910 68.0553  10
  -1  -1  15 423.438 52.4916   5
  -1   1  15 276.255 56.8064   5
  -1  -1  15 273.075 51.3262   7
  -1   1  15 285.645 58.3698   7
   1   1 -15 284.714 35.6496  13
  -1  -1  15 395.804 62.9716  11
  -1   1  15 321.671 68.2172  11
  -1   1  15 221.865 64.5420  10
  -1   1  15 250.914 62.9722   9
   1  -1 -15 234.753 56.8974   9
   1   1 -15 266.766 50.4305   9
  -1  -1  15 489.628 64.1418  10
  -1  -1  15 378.945 56.6244   9
  -1   1  14 1077.38 72.4762   7
  -1  -1  14 1070.24 61.1334   5
  -1   1  14 1109.49 69.2540   5
  -1  -1  14 1117.95 72.3545  10
  -1   1  14 1089.08 77.3389  10
  -1  -1  14 912.522 71.8583  11
   1   1 -14 902.876 50.2665  13
  -1   1  14 941.888 77.3143  11
  -1   1  14 1102.20 76.8926   9
  -1  -1  14 946.965 62.6706   7
  -1  -1  14 876.540 65.7038   9
   1   1 -14 1069.98 63.6712   9
   1  -1 -14 1122.78 70.9718   9
  -1   1  13 159.868 48.8023   5
  -1  -1  13 12.2800 37.6297   5
  -1   1  13 3.05142 45.8270   7
  -1  -1  13 74.7817 42.3809   7
   1   1 -13 15.3593 30.2575  13
  -1   1  13-14.1588 50.1277  11
   1   1 -13 53.3754 40.0438   9
  -1   1  13-5.72052 51.4550  10
  -1  -1  13 16.0174 48.6238  10
  -1  -1  13-22.4935 41.7680   9
   1  -1 -13 53.7979 46.8931   9
  -1   1  13 9.57966 50.8570   9
  -1  -1  12 439.486 44.7430   7
  -1   1  12 470.199 51.0869   5
  -1  -1  12 534.253 45.6067   5
  -1   1  12 466.226 52.5626   7
  -1   1  12 428.699 58.0382  11
   1   1 -12 506.537 38.1092  13
  -1   1  12 483.960 56.7223  10
   1  -1 -12 500.292 53.4177   9
  -1  -1  12 498.587 49.2134   9
   1   1 -12 481.630 45.4958   9
  -1   1  12 556.909 57.6410   9
  -1  -1  12 561.840 54.8710  10
  -1  -1  11 2641.74 89.2574   5
  -1   1  11 2832.08 100.171   5
   1   1 -11 2723.58 85.1544  13
   1  -1 -11 2630.21 98.1734  10
  -1  -1  11 2828.06 99.9069  10
  -1   1  11 2767.46 101.548  10
  -1   1  11 2684.50 105.705  11
   1   1 -11 2622.83 91.0787   9
   1  -1 -11 2942.72 102.262   9
  -1   1  11 2850.96 102.360   7
  -1  -1  11 2881.49 96.2494   9
  -1  -1  11 2666.14 92.2869   7
  -1   1  11 2861.63 104.740   9
  -1   1  10 1196.50 62.6104   5
  -1  -1  10 1112.07 52.7134   5
   1  -1 -10 1048.07 58.5148  10
  -1   1  10 1199.68 67.0023  11
   1   1 -10 1138.27 47.2005  13
  -1  -1  10 1225.54 62.9543  10
  -1   1  10 1165.30 61.9285  10
  -1   1  10 1131.11 63.3419   9
   1   1 -10 1197.80 53.2424   9
  -1  -1  10 998.661 53.4545   9
   1  -1 -10 1192.00 62.2327   9
  -1   1  10 1134.29 61.4951   7
  -1   1   9 5627.16 159.983   5
  -1  -1   9 5573.98 148.730   5
  -1   1   9 5774.76 159.205  10
   1   1  -9 5502.02 145.936  13
   1  -1  -9 5678.94 156.105  10
  -1   1   9 5595.93 164.550  11
   1   1  -9 5705.20 150.596   9
  -1   1   9 5612.01 161.515   9
   1  -1  -9 5722.10 160.464   9
  -1   1   9 5657.01 159.753   7
  -1  -1   9 5557.96 152.437   9
  -1  -1   8 4704.26 123.965   5
  -1   1   8 4973.70 136.195   5
  -1  -1   8 4644.00 110.429   2
  -1  -1   8 4355.16 109.116   1
   1  -1  -8 4540.78 109.518   1
   1  -1  -8 4844.84 130.825  10
   1   1  -8 4959.77 123.104  13
  -1   1   8 4913.58 140.491  11
   1  -1  -8 4931.51 136.373   9
  -1   1   8 4947.77 137.627   9
   1   1  -8 4901.50 125.830   9
  -1   1   8 4922.98 135.605   7
  -1  -1   8 4910.68 127.464   9
  -1  -1   7 480.343 28.5310   5
  -1  -1   7 479.357 20.1458   2
  -1  -1   7 490.025 18.7873   1
   1  -1  -7 510.432 19.3459   3
  -1   1   7 409.786 19.3683   4
   1  -1  -7 510.448 18.8504   1
   1   1  -7 506.640 27.1379  13
   1  -1  -7 479.692 34.1490  10
  -1   1   7 543.348 39.4998  11
  -1   1   7 470.099 35.7536   7
  -1  -1   7 483.619 29.7658   9
   1  -1  -7 495.184 37.4254   9
  -1   1   7 506.561 38.1087   9
   1   1  -7 486.846 28.6013   9
  -1  -1   6 5620.85 140.014   5
  -1   1   6 5467.03 135.420   2
   1  -1  -6 5504.21 133.414   1
   1  -1  -6 5617.32 133.639   3
  -1  -1   6 5617.19 136.516   4
  -1  -1   6 5584.65 133.386   1
   1  -1  -6 5779.23 146.698  10
   1   1  -6 5607.93 140.827  13
  -1   1   6 5624.33 153.438  11
  -1   1   6 5851.90 151.054   7
  -1   1   6 5722.97 152.111   9
   1  -1  -6 5833.21 151.999   9
   1   1  -6 5797.40 140.993   9
  -1  -1   6 5832.01 141.740   9
  -1  -1   5 11116.2 265.404   5
  -1   1   5 11820.6 276.578   7
   1   1  -5 11651.4 267.113   5
   1  -1  -5 11212.1 262.895   1
  -1  -1   5 11227.3 265.783   4
  -1   1   5 11261.9 264.869   2
   1   1  -5 11370.6 267.971  13
  -1   1   5 11457.4 278.922  11
   1  -1  -5 11544.1 272.575  10
   1   1  -5 11639.6 266.310   9
  -1  -1   5 11625.0 266.768   9
  -1   1   5 11507.7 277.585   9
   1  -1  -5 11758.3 275.701   7
  -1   1   4 62924.2 1447.19   7
   1   1  -4 63428.8 1436.76   5
  -1  -1   4 62932.6 1435.73   5
  -1   1   4 63432.6 1438.34   2
   1  -1  -4 63055.1 1436.54   1
  -1  -1   4 63532.0 1440.04   4
   1   1  -4 63169.8 1440.43  13
  -1   1   4 62771.6 1448.58  11
   1  -1  -4 63791.4 1443.28  10
  -1  -1   4 64000.8 1438.25  13
  -1   1   4 64423.2 1448.19   9
  -1  -1   4 62972.4 1436.42   9
   1   1  -4 63401.7 1435.90   9
  -1   1   3 5202.39 132.232   7
  -1  -1   3 5140.20 127.198  13
   1  -1  -3 5369.04 130.069  10
  -1   1   3 5389.13 133.988  11
  -1   1   3 5217.37 127.173   2
  -1  -1   3 5163.47 128.819   4
  -1  -1   2 1740.19 49.2586   6
  -1   1   2 1701.47 49.6370   7
  -1   1   2 1697.06 47.1347   2
  -1  -1   2 1742.30 49.2780   4
  -1   1   2 1729.34 48.9988  13
  -1  -1   2 1578.84 47.4222  13
   1  -1  -2 1708.42 50.3477  11
  -1  -1   1 19479.3 446.737   7
   1  -1  -1 19856.1 451.048   7
   1   1  -1 19668.0 450.632   6
   1   1  -1 19524.3 451.755   4
  -1   1   1 19395.4 449.444   2
  -1   1   1 19985.6 451.671  13
   1   1  -1 18696.3 449.111  12
   1  -1  -1 20153.7 450.593  11
   1  -1  -1 19354.6 446.039   8
  -1  -1   1 19480.9 446.920   8
   1   1   0 736.299 27.4184   6
   1  -1   0 676.983 26.2387   5
  -1   1   0 777.779 26.4285   2
   1   1   0 807.774 28.1465   4
  -1   1   0 765.548 27.4629  13
   1   1   0 713.434 26.5144  12
  -1  -1   0 767.802 25.9261   9
  -1  -1   0 779.480 26.1566   7
   1  -1   1 6973.10 168.796   5
   1   1   1 7273.96 171.481   4
   1  -1   1 7160.02 168.701   2
  -1   1  -1 7134.81 171.856  13
  -1  -1  -1 7063.82 171.831   9
   1  -1   1 7005.73 168.399   9
   1  -1   2 4322.62 107.041   5
   1   1   2 4325.54 112.175   5
   1  -1   2 4297.11 105.622   2
   1   1   2 4396.34 108.235   4
  -1  -1  -2 4254.48 102.770  10
  -1  -1  -2 4174.07 111.993   9
   1  -1   2 4307.20 107.012   9
   1   1   3 4983.39 129.300   5
   1  -1   3 5020.53 122.791   5
  -1  -1  -3 4841.14 120.675   4
  -1   1  -3 4843.04 119.707   2
   1  -1   3 5006.72 117.610   1
  -1  -1  -3 5079.43 118.972  10
   1  -1   3 4945.05 123.291   9
   1   1   3 4992.39 129.766   9
  -1   1  -4 12767.0 318.010   5
   1   1   4 14055.4 326.666   5
   1  -1   4 13834.0 318.664   5
  -1   1  -4 13506.3 312.749   2
   1  -1   4 13418.6 310.048   1
  -1  -1  -4 13194.9 313.187   4
  -1  -1  -4 14007.3 315.052  10
   1   1   4 13748.6 316.019  10
  -1   1  -4 12459.8 318.173   9
   1   1   4 13613.6 326.753   9
   1  -1   4 13460.6 319.060   9
   1  -1   5 47081.2 1098.87   5
   1   1   5 49077.2 1107.51   5
  -1   1  -5 48133.0 1100.48   5
  -1  -1  -5 48001.2 1087.48   1
  -1   1  -5 48747.1 1090.85   2
  -1  -1  -5 47525.0 1090.80   4
   1  -1   5 46416.2 1087.27   1
  -1  -1  -5 49263.5 1095.95  10
   1   1   5 49090.8 1097.26  10
   1   1   5 48570.8 1108.64   9
  -1   1  -5 47676.8 1100.67   9
   1  -1   5 47874.6 1100.66   9
  -1   1  -6 6934.35 179.976   5
   1  -1   6 7094.34 178.053   5
   1   1   6 7232.35 186.818   5
   1  -1   6 7026.49 162.787   1
  -1  -1  -6 6836.82 162.833   1
   1  -1   6 7088.34 162.940   3
  -1   1  -6 6912.48 166.471   4
   1   1   6 7097.32 177.002  10
  -1  -1  -6 7043.38 175.161  10
   1   1   6 7019.08 187.245   7
   1  -1   6 7125.86 180.602   9
  -1   1  -6 7089.98 179.700   9
   1   1   6 7044.97 187.944   9
  -1  -1  -7 30.8207 9.55132   2
   1   1   7 25.5765 28.8422   5
   1  -1   7 34.1039 9.69131   1
  -1   1  -7 19.8159 10.6825   4
  -1   1  -7 27.9333 26.3368   5
  -1  -1  -7 36.8406 9.94992   1
   1   1   7 25.7827 28.5264   7
   1  -1   7 32.4574 24.2097   5
  -1   1  -7 22.6016 25.8253   9
   1  -1   7 14.3179 25.2498  10
   1  -1   7-10.8120 27.3663   9
   1   1   7 42.5139 32.3932   9
  -1  -1  -7 13.3957 29.9008   9
   1   1   7 13.9208 24.0269  10
  -1  -1  -7 53.8765 23.9901  10
  -1   1  -8 1996.70 76.4187   5
   1   1   8 1991.05 77.7974   5
   1  -1   8 1994.23 72.2702   5
   1   1   8 1860.85 79.5330   7
  -1   1  -8 2058.39 74.3633   9
  -1  -1  -8 2036.68 79.6043   9
   1  -1   8 1949.92 74.4616   9
   1   1   8 2026.18 82.6965   9
   1   1   9 339.840 44.7404   5
   1  -1   9 266.088 38.2469   5
   1   1   9 279.167 44.4436   7
   1   1   9 191.505 43.5381   9
  -1   1  -9 321.743 38.5017   9
  -1  -1  -9 328.023 44.1732   9
   1  -1   9 206.006 37.5433   9
   1  -1   9 262.191 38.2211  10
   1  -1  10 339.555 42.0178   5
   1   1  10 414.009 47.0716   5
   1   1  10 278.500 47.5787   7
   1   1  10 335.127 50.3888   9
  -1  -1 -10 379.105 48.2732   9
   1   1  10 367.235 44.1359  10
   1  -1  10 334.217 45.2171   9
  -1   1 -10 436.968 44.5630   9
   1  -1  10 390.827 44.3188  10
   1  -1  11 2741.05 95.1440   5
   1   1  11 2495.48 99.5555   5
   1   1  11 2741.79 98.1199  10
  -1   1 -11 2683.43 92.0034  13
   1  -1  11 2627.50 96.2163  10
   1   1  11 2666.31 106.524   7
   1  -1  11 2622.91 99.4876   9
  -1   1 -11 2577.66 96.0198   9
   1   1  11 2486.31 105.644   9
  -1  -1 -11 2628.09 102.300   9
   1  -1  12 534.853 53.5177   5
   1   1  12 509.008 60.1218   7
   1   1  12 485.587 55.7008   5
  -1   1 -12 562.094 47.3212  13
   1  -1  12 578.232 55.9231  10
  -1   1 -12 612.844 55.1684   9
   1   1  12 579.596 64.3858   9
  -1  -1 -12 621.785 60.3465   9
   1  -1  12 534.909 57.9553   9
   1   1  12 578.221 57.3239  10
   1  -1  13 79.2045 45.8891   5
   1   1  13 192.692 53.7498   5
   1   1  13 50.5239 50.5100   7
  -1   1 -13 71.3726 38.1807  13
  -1  -1 -13 122.012 54.3864   9
   1  -1  13 177.085 51.7216  10
   1  -1  13 12.1571 49.0432   9
   1   1  13 112.365 51.1027  10
  -1   1 -13 119.037 48.1365   9
   1   1  13 78.9250 56.4668   9
   1  -1  14 1712.69 81.6395   5
   1   1  14 1586.37 83.9627   5
   1   1  14 1689.96 96.8585  11
  -1   1 -14 1699.86 78.0901  13
   1  -1  14 1782.54 85.1111  10
   1   1  14 1598.90 86.3738  10
   1  -1  14 1636.22 86.9119   9
  -1   1 -14 1490.22 80.7872   9
  -1  -1 -14 1623.01 87.3346   9
   1  -1  14 1569.83 85.2866   7
   1   1  14 1559.86 93.6425   9
   1   1  14 1707.83 93.9336   7
   1   1  15 1127.39 77.0933   5
   1  -1  15 1208.73 71.6343   5
   1  -1  15 1221.13 77.8934  10
  -1   1 -15 1000.65 65.0064  13
   1   1  15 1075.30 77.4640  10
   1   1  15 1024.60 85.5595  11
   1  -1  15 1020.74 76.2381   7
   1   1  15 877.321 82.7312   9
  -1   1 -15 1028.78 73.2065   9
  -1  -1 -15 1171.02 80.0621   9
   1  -1  15 1120.51 80.4369   9
   1   1  15 1064.05 81.8618   7
   1  -1  16 59.1094 58.1770   7
   1   1  16 126.544 58.6316   5
   1   1  16 28.1099 64.8214   7
   1  -1  16 82.7981 56.7678   5
  -1   1 -16 18.4656 46.7268  13
   1   1  16-86.0030 65.3300  10
   1   1  16 75.7199 64.9441   9
   1  -1  16 10.3703 60.9794   9
  -1   1 -16 99.6294 56.2111   9
   1  -1  16 55.7042 60.7009  10
  -1  -1 -16 80.6006 64.0991   9
   1   1  17 45.0851 65.6028   7
   1  -1  17 138.999 59.7935   5
   1  -1  17-21.5537 60.3060   7
   1   1  17 113.517 62.3528   5
  -1   1 -17-26.2341 46.8844  13
   1   1  17 49.3507 73.3412   9
  -1   1 -17 97.1777 57.7810   9
  -1  -1 -17 30.5256 65.0131   9
   1  -1  17 77.9936 66.2568   9
  -1   2  17 409.947 69.9762   5
  -1  -2  17 306.826 56.2741   7
  -1   2  17 341.042 71.1884   7
  -1  -2  17 349.339 68.4377  11
   1  -2 -17 400.786 45.0185  13
   1   2 -17 393.385 42.5725  13
   1   2 -17 412.476 53.9471   9
   1  -2 -17 481.803 71.2371   9
  -1   2  16 619.100 72.5775   7
  -1   2  16 679.178 69.3101   5
  -1  -2  16 573.977 56.4338   5
   1   2 -16 578.043 47.2076  13
  -1  -2  16 554.479 68.5684  11
   1  -2 -16 603.007 49.7062  13
  -1   2  16 557.895 76.5261  11
   1   2 -16 588.971 54.8541   9
  -1  -2  16 541.865 58.5709   9
  -1  -2  16 669.381 61.2008   7
   1  -2 -16 545.774 70.8720   9
  -1  -2  15 1645.89 74.8757   5
  -1   2  15 1665.13 94.9647   7
  -1   2  15 1893.87 90.3551   5
   1   2 -15 1815.99 71.3510  13
  -1   2  15 1814.13 101.110  11
   1  -2 -15 1666.89 73.8091  13
  -1  -2  15 1841.93 91.6330  10
  -1   2  15 1781.58 99.9440   9
  -1  -2  15 1744.24 78.8577   7
   1  -2 -15 1601.51 92.0114   9
   1   2 -15 1785.13 77.5230   9
  -1  -2  15 1797.65 81.6980   9
  -1  -2  14 142.424 42.2473   7
  -1  -2  14 165.950 42.2333   5
  -1   2  14 71.8689 51.7305   5
  -1   2  14 112.787 56.0765   7
   1   2 -14 174.415 37.5838  13
  -1   2  14 115.606 60.4473  11
  -1  -2  14 129.705 57.6337  10
  -1  -2  14 154.559 48.3752   9
   1  -2 -14 114.490 57.9741   9
   1   2 -14 183.393 44.8959   9
  -1   2  14 158.363 60.3072   9
  -1  -2  13 58.4002 36.8906   5
  -1   2  13 115.220 54.4651   7
  -1   2  13 135.415 51.9823   5
   1   2 -13 61.8288 33.9563  13
  -1   2  13 79.6298 56.1850  11
  -1   2  13 159.931 57.7394   9
   1  -2 -13 68.6309 52.4688   9
   1  -2 -13 145.195 51.8251  10
  -1  -2  13 52.5839 40.9929   9
   1   2 -13 99.0950 39.8324   9
  -1  -2  13 117.642 53.0488  10
  -1   2  12 23.1929 47.8641   7
  -1  -2  12 17.4961 33.1097   5
  -1   2  12-12.2170 49.0036   5
  -1   2  12-10.7636 50.1747  11
   1   2 -12 28.2328 30.8742  13
  -1   2  12 17.0782 51.2976   9
  -1  -2  12 128.331 48.9441  10
   1  -2 -12 12.3602 45.1555  10
   1  -2 -12 3.15101 47.8456   9
  -1  -2  12 77.0039 37.7047   9
   1   2 -12 62.1347 35.2402   9
  -1  -2  11 90.0479 31.7209   5
  -1   2  11 125.544 46.2118   7
   1  -2 -11 86.8321 11.3908   1
  -1   2  11 175.039 48.9144   5
  -1   2  11 158.345 46.8753  11
   1   2 -11 109.523 31.9671  13
  -1   2  11 144.744 49.5565   9
   1  -2 -11 181.496 49.4103   9
  -1  -2  11 134.465 34.6363   9
  -1  -2  11 121.028 45.7851  10
   1   2 -11 219.156 35.2423   9
   1  -2 -11 159.394 42.5117  10
  -1  -2  10 524.634 36.9625   5
  -1   2  10 581.475 53.4601   7
  -1   2  10 614.441 55.4479   5
  -1  -2  10 574.864 25.1947   2
  -1   2  10 564.233 26.7626   4
   1  -2 -10 554.026 24.3628   3
   1  -2 -10 608.834 24.5089   1
  -1  -2  10 555.698 24.2121   1
   1  -2 -10 586.667 49.9526  10
  -1   2  10 572.803 54.2371  11
   1   2 -10 588.223 39.6321  13
  -1  -2  10 599.713 41.6282   9
   1  -2 -10 573.750 53.0287   9
   1   2 -10 656.440 39.4248   9
  -1   2  10 604.614 55.6108   9
  -1  -2   9 6745.43 179.387   5
  -1   2   9 6979.57 201.112   7
  -1   2   9 7217.08 176.047   4
  -1   2   9 7162.38 200.235   5
   1  -2  -9 7137.71 171.343   3
   1  -2  -9 7078.67 171.286   1
  -1  -2   9 7152.65 174.417   2
  -1  -2   9 7148.44 171.152   1
   1  -2  -9 7228.67 191.023  10
   1   2  -9 7414.28 188.286  13
  -1   2   9 7228.23 204.050  11
  -1   2   9 7529.07 204.305   9
   1   2  -9 7388.34 181.753   9
  -1  -2   9 7167.73 183.220   9
   1  -2  -9 7497.87 202.187   9
  -1  -2   8 3141.45 89.5115   5
   1   2  -8 3047.15 91.8506   5
  -1   2   8 3293.28 109.146   7
  -1   2   8 3149.32 88.2755   4
   1  -2  -8 3282.83 85.0694   1
  -1  -2   8 3271.91 88.4103   2
  -1   2   8 3430.61 111.577  11
   1  -2  -8 3351.64 100.256  10
   1   2  -8 3235.36 97.0968  13
   1   2  -8 3263.50 90.2274   9
  -1  -2   8 3258.65 91.9272   9
   1  -2  -8 3282.15 109.219   9
  -1   2   8 3370.58 110.575   9
   1   2  -7 30765.5 722.439   5
  -1  -2   7 31248.8 720.424   5
  -1   2   7 32644.9 742.360   7
  -1  -2   7 30908.8 723.161   2
   1  -2  -7 31147.4 719.542   1
  -1   2   7 31057.6 723.765   4
   1   2  -7 30748.0 730.618  13
   1  -2  -7 31825.9 730.755  10
  -1   2   7 31448.7 742.296  11
  -1  -2   7 31191.3 722.095   9
   1  -2  -7 31498.4 741.762   9
   1   2  -7 32090.3 720.902   9
  -1   2   7 32124.0 742.702   9
  -1  -2   6 6448.21 154.235   5
   1   2  -6 6526.52 155.461   5
  -1   2   6 6402.40 173.108   7
  -1   2   6 6163.82 159.800   4
  -1  -2   6 6395.80 160.705   4
   1  -2  -6 6161.86 157.083   2
   1   2  -6 6347.62 162.389   4
   1   2  -6 6309.54 165.208  13
   1  -2  -6 6533.45 164.893  10
  -1   2   6 6368.15 174.149  11
  -1  -2   6 6119.34 155.047   9
  -1   2   6 6597.30 174.719   9
   1  -2  -6 6405.88 171.110   7
   1   2  -6 6287.76 153.833   9
   1   2  -5 2571.26 66.4814   5
  -1   2   5 2412.07 82.9706   7
  -1  -2   5 2530.39 66.5053   5
  -1  -2   5 2607.27 79.9627   6
   1  -2  -5 2508.15 72.3013   2
   1   2  -5 2581.11 76.9059   4
  -1   2   5 2486.26 73.9258   2
  -1  -2   5 2513.85 74.9262   4
   1  -2  -5 2686.19 77.3159  10
  -1  -2   5 2572.17 75.2360  13
  -1   2   5 2501.82 83.7092  11
   1   2  -5 2468.63 78.3577  13
   1  -2  -5 2622.76 81.0807  13
  -1  -2   5 2595.50 67.0721   9
  -1   2   5 2504.92 84.1474   9
   1   2  -4 15033.0 355.288   5
  -1  -2   4 15552.2 368.908   6
  -1   2   4 15817.8 373.311   7
  -1  -2   4 15489.1 356.963   5
   1   2  -4 15853.0 368.317   4
  -1  -2   4 15114.7 366.558   4
  -1   2   4 15533.7 365.929   2
   1  -2  -4 15649.9 364.201   2
   1  -2  -4 15422.0 372.818  11
  -1  -2   4 15482.8 366.843  13
   1   2  -4 15249.4 369.484  13
   1  -2  -4 15671.5 370.955  13
  -1  -2   4 15577.5 355.602   9
   1   2  -3 56872.4 1265.41   5
  -1  -2   3 56652.1 1277.67   6
  -1   2   3 55315.7 1280.33   7
  -1  -2   3 55985.7 1270.08   7
  -1   2   3 57104.7 1275.68   2
  -1  -2   3 55332.2 1276.47   4
   1  -2  -3 55476.7 1279.78  11
  -1  -2   3 56935.4 1277.89  13
  -1  -2   3 55747.9 1273.07  12
  -1   2   3 56855.6 1268.44   8
  -1  -2   2 329.646 24.2217   7
   1  -2  -2 150.617 24.7030   7
  -1  -2   2 446.295 27.6983   6
  -1   2   2 271.852 22.5850   2
  -1  -2   2 451.877 27.5637   4
   1  -2  -2 285.994 24.4080  11
  -1  -2   2 356.309 22.4641  12
  -1   2   2 212.504 24.4068  13
  -1  -2   2 240.846 28.9340  13
  -1  -2   2 216.536 14.6820  11
   1  -2  -1 28063.4 646.625   7
  -1  -2   1 28111.7 641.990   7
  -1   2   1 27040.1 644.776   2
   1   2  -1 28217.5 647.229   4
  -1   2   1 28254.8 649.363  13
  -1  -2   1 28251.5 636.270  11
  -1  -2   1 27902.9 642.231  12
   1  -2  -1 27925.7 644.302  11
  -1  -2   1 28263.8 649.317  13
  -1  -2   1 28000.1 640.334   9
   1  -2  -1 28254.6 633.615   8
  -1  -2   0 5353.71 138.142   7
   1  -2   0 5305.12 138.994   7
   1   2   0 5292.23 140.581   6
   1   2   0 5458.83 140.963   4
  -1   2   0 5556.40 139.126   2
  -1   2   0 5537.08 143.553  13
  -1  -2   0 5324.85 132.936  11
   1  -2   0 5503.73 136.371  11
  -1  -2   0 5422.11 136.922   9
   1  -2   1 34765.5 809.778   5
   1  -2   1 35880.3 810.518   2
   1   2   1 34423.0 812.589   4
  -1   2  -1 35525.9 799.642  12
  -1   2  -1 35496.5 816.455  13
  -1  -2  -1 34875.6 811.898   9
  -1  -2  -1 34611.1 812.935   7
  -1  -2  -2 16.3948 18.9585   7
   1  -2   2-3.63445 12.7668   6
   1  -2   2 4.16262 15.0774   5
  -1   2  -2 1.72027 12.9711   6
   1   2   2-1.32173 14.6259   4
   1  -2   2-5.61026 14.3006   2
   1  -2   2 31.0867 18.6884  13
   1  -2   2 18.3255 8.40886  12
   1  -2   2 5.42901 13.3610   9
  -1  -2  -2 2.98197 17.6377   9
   1  -2   3 306.572 19.8751   6
  -1   2  -3 333.970 19.3173   6
   1  -2   3 324.965 22.5258   5
  -1   2  -3 367.015 22.2886   5
  -1   2  -3 300.614 23.8564   2
   1  -2   3 288.249 22.3022   2
  -1  -2  -3 317.661 24.2736   4
   1   2   3 352.193 25.2222   4
   1  -2   3 386.964 26.9485  13
  -1  -2  -3 288.514 28.1027   9
   1  -2   3 352.332 23.2111   9
  -1  -2  -3 320.693 27.7741   7
  -1   2  -4 16004.3 369.261   5
   1  -2   4 15940.7 368.100   6
   1  -2   4 15755.7 370.502   5
  -1  -2  -4 15874.7 372.319   4
  -1   2  -4 16061.3 371.956   2
   1   2   4 16011.4 373.761   4
   1  -2   4 15394.8 369.413   2
  -1  -2  -4 15990.6 367.424  10
  -1   2  -4 14604.4 377.825  13
  -1   2  -4 15794.4 370.174   9
   1   2   4 15686.3 383.615   7
   1  -2   4 15837.6 370.016   9
  -1  -2  -4 14180.2 379.341   9
  -1   2  -5 930.075 39.4494   5
   1  -2   5 918.764 40.4661   5
   1  -2   5 865.790 36.1155   6
   1  -2   5 977.945 36.7033   2
   1   2   5 923.052 50.4606   5
   1   2   5 953.622 39.0004   4
  -1  -2  -5 984.536 39.4624   4
  -1   2  -5 870.890 44.5413  13
  -1  -2  -5 962.818 37.7744  10
   1  -2   5 883.098 40.1743   9
   1   2   5 930.981 49.7965   7
  -1   2  -5 918.684 39.8731   9
   1   2   5 882.047 50.3488   9
  -1   2  -6 7438.29 186.969   5
   1   2   6 7427.10 200.788   5
   1  -2   6 7233.52 186.863   5
   1  -2   6 7115.91 182.912   6
   1   2   6 7677.41 184.942   4
  -1   2  -6 7430.35 184.139   4
  -1  -2  -6 7183.53 182.210   2
   1  -2   6 7347.15 180.125   2
  -1  -2  -6 7381.27 184.141  10
  -1   2  -6 7561.42 194.657  13
   1   2   6 7514.08 202.325   9
  -1   2  -6 7221.78 186.747   9
   1  -2   6 7343.69 187.235   9
   1   2   6 7573.17 202.210   7
  -1   2  -7 89.9721 26.3721   5
   1   2   7 76.8870 32.2488   7
   1  -2   7 96.7103 22.2711   6
   1  -2   7 105.279 27.6313   5
  -1  -2  -7 76.6681 18.7905   2
   1  -2   7 74.5695 17.6856   1
  -1   2  -7 76.6668 19.8707   4
   1   2   7 117.003 37.3242   5
  -1   2  -7 99.7287 27.7262  13
   1  -2   7 96.8807 28.0224   9
   1   2   7 111.463 38.4853   9
  -1   2  -7 111.799 28.7998   9
  -1  -2  -7 51.0359 23.0528  10
  -1   2  -8 604.461 42.0748   5
   1   2   8 627.586 52.0721   5
   1  -2   8 666.637 41.4677   5
  -1   2  -8 533.933 29.1159   4
   1  -2   8 566.203 26.4923   1
  -1  -2  -8 476.787 27.0648   2
  -1   2  -8 569.886 42.1920  13
  -1  -2  -8 550.642 39.3145  10
   1  -2   8 567.061 43.3056   9
   1   2   8 515.346 52.0765   9
  -1   2  -8 628.021 42.5666   9
   1   2   8 625.874 51.5495   7
  -1  -2  -8 582.968 50.6580   9
   1  -2   9 3961.36 120.510   5
  -1   2  -9 4024.80 123.926   5
   1   2   9 4238.48 135.504   5
  -1   2  -9 4150.56 106.805   4
  -1  -2  -9 4017.75 101.136   1
   1  -2   9 4157.98 101.225   3
  -1  -2  -9 4032.28 103.109   2
   1  -2   9 4035.77 101.046   1
  -1  -2  -9 4114.71 120.038  10
   1  -2   9 4253.42 125.504  10
  -1   2  -9 4196.75 126.874  13
  -1  -2  -9 4305.11 137.523   9
   1   2   9 4237.31 138.314   9
   1  -2   9 4135.27 124.096   9
  -1   2  -9 4240.49 123.625   9
   1   2   9 4420.33 139.722   7
   1   2  10 939.539 62.9901   5
   1  -2  10 839.517 50.4366   5
  -1  -2 -10 762.253 25.9493   1
  -1  -2 -10 754.008 26.4310   1
  -1   2 -10 969.141 54.9325  13
   1  -2  10 940.619 58.0525  10
   1   2  10 884.825 65.6130  11
  -1  -2 -10 911.733 52.5917  10
   1   2  10 886.477 58.2602  10
   1   2  10 990.558 66.7141   7
  -1  -2 -10 846.043 63.1683   9
   1   2  10 981.337 69.4664   9
  -1   2 -10 837.146 52.1682   9
   1  -2  10 1042.99 56.3793   9
   1   2  11 4817.25 156.595   5
   1  -2  11 4624.17 143.244   5
  -1   2 -11 4881.40 148.870  13
   1  -2  11 5048.29 149.074  10
   1   2  11 5047.14 164.846  11
   1   2  11 4890.38 149.806  10
   1   2  11 5014.95 163.779   9
   1   2  11 5127.28 164.308   7
  -1  -2 -11 4872.12 159.099   9
  -1   2 -11 5053.77 147.582   9
   1  -2  11 4850.70 148.344   9
   1   2  12 618.720 67.7880   7
   1  -2  12 578.751 51.9556   5
   1   2  12 553.830 61.9160   5
  -1   2 -12 512.689 50.7965  13
   1   2  12 536.540 66.4377  11
  -1   2 -12 532.314 53.3597   9
   1   2  12 414.747 56.5292  10
   1  -2  12 584.324 58.2250  10
   1   2  12 475.179 63.5659   9
  -1  -2 -12 458.583 63.5631   9
   1  -2  12 525.457 55.5113   9
   1   2  13 3011.55 114.696   5
   1  -2  13 2722.44 102.592   5
  -1   2 -13 2895.79 107.158  13
   1   2  13 2835.80 122.598  11
   1  -2  13 2870.82 109.396  10
  -1   2 -13 2808.26 105.839   9
   1  -2  13 2991.19 110.261   9
   1   2  13 2758.11 120.735   7
   1   2  13 2876.99 112.466  10
  -1  -2 -13 3280.22 122.617   9
   1   2  13 3024.60 124.472   9
   1   2  14 345.615 66.2386   7
   1  -2  14 425.514 55.5393   5
   1   2  14 301.279 61.9469   5
   1   2  14 457.634 71.0743  11
  -1   2 -14 389.899 52.3561  13
   1   2  14 418.370 69.5864   9
  -1  -2 -14 468.099 68.5972   9
   1  -2  14 402.134 62.6468  10
   1  -2  14 405.265 60.4186   9
  -1   2 -14 395.557 56.1827   9
   1   2  15 82.2866 59.8643   5
   1   2  15 16.8073 63.3022   7
   1  -2  15 186.657 56.1108   5
   1   2  15 106.431 66.1595  11
  -1   2 -15 23.3936 46.2638  13
  -1  -2 -15 176.181 66.1803   9
  -1   2 -15 80.7305 53.3766   9
   1  -2  15 145.565 61.8573  10
   1  -2  15 18.5700 56.2948   9
   1   2  15 75.3392 67.8225   9
   1   2  16 64.8264 63.9154   7
   1  -2  16 58.0870 46.4746   6
   1  -2  16 87.7083 55.6674   5
   1  -2  16 137.263 61.0294   7
   1   2  16 3.30868 63.6932   5
  -1   2 -16-2.89694 49.4955  13
   1   2  16 90.4853 73.8409   9
   1  -2  16 25.5058 56.1341   9
  -1  -2 -16 92.8317 67.8310   9
  -1   2 -16 54.3321 56.0039   9
  -1  -3  17 79.9893 57.2457   6
  -1   3  17 78.2212 66.5117   5
  -1   3  17 93.3279 70.9774   7
   1   3 -17 64.7057 40.8269  13
  -1  -3  17 65.2287 61.4694  11
   1  -3 -17 19.4614 67.8300   9
   1   3 -17 13.0065 45.9429   9
  -1  -3  16 84.8652 47.9928   7
  -1  -3  16 156.153 44.3013   5
  -1   3  16 218.818 67.6598   5
  -1  -3  16 239.916 59.3022   6
  -1   3  16 208.822 68.1389   7
   1   3 -16 189.338 42.4517  13
   1   3 -16 106.417 43.2368   9
   1  -3 -16 89.1940 68.9660   9
  -1   3  15 175.825 66.2490   7
  -1  -3  15 42.5575 40.7122   5
  -1  -3  15 251.932 58.6765   6
  -1   3  15 236.978 64.6877   5
  -1   3  15 163.285 67.5489  11
   1   3 -15 119.412 41.7661  13
   1  -3 -15 199.942 68.5210   9
   1   3 -15 200.361 43.3681   9
   1  -3 -15 166.317 61.1202  10
  -1  -3  15 126.925 63.6223  10
  -1  -3  15 198.144 45.9739   9
  -1  -3  14 2511.15 104.574   6
  -1  -3  14 2379.73 87.3346   5
  -1   3  14 2639.68 115.619   5
  -1   3  14 2661.17 118.812   7
   1  -3 -14 2863.68 108.429  10
  -1   3  14 2905.65 124.353  11
  -1  -3  14 2904.83 111.724  10
   1   3 -14 2594.85 96.3961  13
  -1  -3  14 2825.91 95.5331   9
   1  -3 -14 2642.72 118.186   9
   1   3 -14 2551.61 89.5577   9
  -1  -3  13 761.836 47.1284   5
  -1  -3  13 878.882 62.2262   6
  -1   3  13 708.328 71.6259   7
  -1   3  13 671.716 68.8035   5
  -1   3  13 774.651 74.9489  11
   1   3 -13 755.207 53.4270  13
  -1  -3  13 852.494 67.6763  10
   1  -3 -13 828.289 63.8178  10
   1  -3 -13 832.080 72.8177   9
  -1  -3  13 860.057 51.5552   9
   1   3 -13 807.242 48.5658   9
  -1  -3  12 735.654 44.8061   5
  -1   3  12 774.569 68.8727   7
  -1  -3  12 694.697 58.6394   6
  -1   3  12 803.237 70.5474   5
   1  -3 -12 739.221 30.7601   1
   1  -3 -12 662.070 31.0354   3
  -1  -3  12 657.324 29.8128   1
  -1  -3  12 633.202 30.7265   1
  -1  -3  12 922.351 65.5011  10
   1   3 -12 827.179 53.8701  13
  -1   3  12 664.598 68.5296  11
   1  -3 -12 639.545 60.0586  10
  -1  -3  12 646.079 46.9424   9
   1   3 -12 740.561 44.8467   9
   1  -3 -12 709.040 69.4957   9
  -1   3  12 705.946 69.6217   9
  -1   3  11 4374.59 146.963   7
  -1  -3  11 4098.07 136.164   6
  -1   3  11 4608.88 148.808   5
  -1  -3  11 3946.27 117.439   5
  -1  -3  11 4095.38 109.472   1
   1  -3 -11 4212.50 110.006   3
  -1  -3  11 4315.07 113.503   2
  -1   3  11 4371.21 117.053   4
   1  -3 -11 4202.10 109.937   1
   1  -3 -11 4581.23 134.290  10
  -1   3  11 4394.30 149.946  11
   1  -3 -11 4319.85 134.341  13
   1   3 -11 4531.10 134.389  13
  -1  -3  11 4497.70 122.663   9
   1  -3 -11 4432.65 148.167   9
  -1   3  11 4372.42 149.214   9
   1   3 -11 4277.71 119.295   9
  -1   3  10 60.6944 45.2402   7
  -1  -3  10 48.3995 26.4420   5
  -1  -3  10 66.3403 38.5435   6
  -1  -3  10 63.4671 25.1205   2
  -1   3  10 13.3856 24.8770   4
   1  -3 -10 0.99356 24.4060   1
   1   3 -10 47.7262 28.6776   5
  -1   3  10 68.8849 47.3976  11
   1  -3 -10 28.7816 35.1120  13
   1   3 -10 91.4750 35.7276  13
   1  -3 -10 34.8653 38.5265  10
   1  -3 -10 3.30928 44.6310   9
  -1   3  10 100.504 50.6673   9
   1   3 -10 92.1373 27.3707   9
  -1  -3  10 72.7954 28.9258   9
  -1  -3   9 489.385 45.9081   6
   1   3  -9 395.770 32.5338   5
  -1  -3   9 491.619 32.2492   5
  -1   3   9 516.018 53.8973   7
  -1  -3   9 425.943 32.7491   2
   1  -3  -9 401.971 31.0166   1
  -1   3   9 443.763 33.3533   4
   1   3  -9 461.821 42.8748  13
   1  -3  -9 482.623 44.1906  13
  -1   3   9 412.318 49.1026  11
   1  -3  -9 520.645 43.2318  10
   1  -3  -9 422.639 52.6841   9
  -1   3   9 455.475 54.4598   9
  -1  -3   9 475.857 33.6973   9
   1   3  -8 3221.61 90.9879   5
  -1   3   8 3296.15 115.836   7
  -1  -3   8 3096.08 105.225   6
  -1  -3   8 3165.87 90.1079   5
   1  -3  -8 3282.11 94.1209   2
   1   3  -8 3205.91 100.491   4
  -1  -3   8 3332.81 97.2468   2
  -1   3   8 3282.70 98.0490   4
   1  -3  -8 3412.65 103.424  10
   1   3  -8 3327.15 106.920  13
   1  -3  -8 3293.76 109.211  13
  -1   3   8 3590.16 117.849  11
  -1   3   8 3409.25 117.042   9
  -1  -3   8 3267.94 91.7227   9
   1  -3  -8 3343.42 116.124   9
   1  -3  -8 3350.35 112.773   7
  -1  -3   7 20189.7 491.684   6
  -1   3   7 20001.3 500.533   7
  -1  -3   7 20194.9 475.445   5
   1   3  -7 20533.8 474.432   5
  -1  -3   7 20472.1 484.862   2
   1   3  -7 19968.9 487.834   4
  -1   3   7 20776.2 486.134   4
   1  -3  -7 20378.0 481.652   2
   1  -3  -7 20083.2 495.563  13
   1   3  -7 20885.8 494.185  13
  -1  -3   7 20739.9 486.165  13
   1  -3  -7 21151.9 487.552  10
  -1  -3   7 20177.0 475.003   9
   1  -3  -7 20407.3 498.246   7
   1   3  -6 15628.0 353.503   5
  -1  -3   6 14891.8 370.515   6
  -1   3   6 14923.6 377.977   7
  -1  -3   6 15097.4 356.093   5
  -1   3   6 15556.2 367.394   4
   1   3  -6 14828.8 368.652   4
  -1  -3   6 15148.1 365.941   2
   1  -3  -6 14917.7 363.165   2
   1   3  -6 15283.3 373.381  13
  -1  -3   6 14548.0 365.099  12
   1  -3  -6 15490.3 366.512  10
  -1  -3   6 15381.2 367.420  13
   1  -3  -6 14727.7 374.505  13
  -1  -3   6 15095.2 353.983   9
   1  -3  -6 14956.1 376.705   7
  -1   3   5 29097.9 687.622   7
  -1  -3   5 29302.5 681.728   6
   1   3  -5 28953.4 663.818   5
   1   3  -5 29967.0 681.924   4
  -1  -3   5 28789.4 678.921   4
  -1   3   5 28695.3 678.744   4
   1  -3  -5 28870.2 675.833   2
   1  -3  -5 29538.1 687.370  11
   1   3  -5 29311.8 684.901  13
  -1  -3   5 28335.9 674.024  12
  -1  -3   5 28896.4 680.001  13
   1  -3  -5 27998.2 685.302  13
  -1  -3   5 28885.0 664.091   9
   1   3  -4 1839.60 62.8568   6
   1   3  -4 1918.44 52.6801   5
  -1   3   4 1840.87 70.2379   7
  -1  -3   4 1907.47 59.4592   7
  -1  -3   4 1796.32 65.9501   6
   1   3  -4 1890.96 66.9850   4
  -1  -3   4 1757.09 64.6779   4
  -1   3   4 1707.34 63.8958   4
   1  -3  -4 1822.80 62.8987   2
   1  -3  -4 1829.66 67.7325  11
   1  -3  -4 1642.31 67.6237  13
  -1  -3   4 1842.98 67.0341  13
  -1  -3   4 1719.84 59.8518  12
   1   3  -4 1727.77 67.3208  13
  -1   3   4 1705.37 52.1819   8
  -1  -3   4 1690.56 51.3868   9
   1  -3  -4 1520.25 67.6186   9
  -1  -3   3 1282.63 52.7720   6
  -1   3   3 1264.81 55.7533   7
   1   3  -3 1279.16 43.1826   5
  -1  -3   3 1227.88 47.5541   7
  -1  -3   3 1256.65 53.2176   4
  -1   3   3 1278.72 51.9532   2
  -1  -3   3 1294.08 55.7215  13
   1  -3  -3 1256.32 53.7527  11
  -1  -3   3 1275.54 47.9892  12
  -1  -3   3 1231.35 40.0887  11
   1   3  -3 1319.06 45.7915  12
  -1   3   3 1216.60 37.1874   8
   1  -3  -3 1172.48 54.2959   9
   1  -3  -2 432.061 33.0256   7
   1   3  -2 436.962 28.3317   7
  -1  -3   2 428.591 32.4973   6
  -1  -3   2 481.548 30.4505   7
  -1   3   2 425.012 30.1529   2
  -1  -3   2 385.430 31.3159   4
  -1  -3   2 395.347 27.6680  12
   1   3  -2 425.924 25.7630  12
   1  -3  -2 343.453 28.8555  11
  -1  -3   2 423.086 35.8449  13
  -1  -3   2 405.216 21.3564  11
  -1   3   2 447.225 33.0784  13
   1  -3  -1 24286.1 568.531   7
  -1  -3   1 23567.3 563.825   7
  -1  -3   1 23892.7 568.394   6
   1   3  -1 23014.7 568.488   4
  -1   3   1 22986.1 566.568   2
  -1  -3   1 24131.6 561.260  12
  -1  -3   1 24625.2 556.463  11
  -1   3   1 23954.2 573.792  13
   1   3  -1 24542.0 556.059  11
  -1  -3   1 24955.4 573.787  13
   1  -3  -1 24479.2 564.479  11
  -1  -3   1 23887.6 561.438   9
   1  -3  -1 23835.4 547.801   8
   1  -3   0 8643.16 215.461   7
  -1  -3   0 8503.30 214.063   7
   1   3   0 8350.70 216.907   6
  -1   3   0 8467.50 215.569   2
   1   3   0 8140.64 216.301   4
   1  -3   0 8098.64 209.442  11
  -1   3   0 8470.88 221.680  13
   1   3   0 8526.00 207.024  11
  -1  -3   0 8364.68 207.074  11
  -1  -3   0 8071.45 211.184   9
  -1  -3   0 8605.22 195.325   8
   1   3   1 24843.1 573.363   6
  -1   3  -1 23171.8 565.149   6
  -1  -3  -1 24892.7 570.116   7
   1  -3   1 24712.1 568.169   7
   1  -3   1 24337.6 567.859   2
   1   3   1 23806.5 570.618   4
  -1  -3  -1 23547.5 563.401  11
  -1   3  -1 23509.4 575.521  13
   1  -3   1 23695.4 562.722  11
  -1   3  -1 24633.5 554.699  12
  -1  -3  -1 23632.7 567.875   9
  -1   3  -2 675.241 34.3975   5
  -1   3  -2 701.296 35.0628   6
   1   3   2 686.189 39.7037   4
   1  -3   2 697.958 36.6811   2
   1  -3   2 699.697 26.2773  12
   1  -3   2 662.233 41.1586  13
  -1   3  -2 633.550 24.8148  12
  -1  -3  -2 673.749 38.7303   9
  -1  -3  -2 668.491 40.2688   7
   1  -3   3 4527.88 123.755   5
   1  -3   3 4600.60 122.834   6
  -1   3  -3 4655.83 122.161   6
  -1   3  -3 4591.73 120.391   5
  -1  -3  -3 4584.75 128.179   4
   1  -3   3 4529.09 125.744   2
   1   3   3 4706.48 129.600   4
   1  -3   3 4568.26 130.332  13
   1  -3   3 4492.81 113.813  12
   1  -3   3 4486.72 119.968   9
  -1  -3  -3 4463.50 131.835   9
  -1  -3  -3 4418.71 131.345   7
   1  -3   4 5287.45 139.389   6
  -1   3  -4 5394.17 137.470   6
   1  -3   4 5295.89 140.324   5
  -1   3  -4 5235.86 137.303   5
   1  -3   4 5391.20 142.350   2
  -1  -3  -4 5372.39 145.006   4
   1   3   4 5487.24 146.652   4
  -1   3  -4 5492.22 146.255   4
   1  -3   4 5123.34 132.185  12
   1  -3   4 5364.86 147.211  13
  -1   3  -4 5136.66 151.158  13
  -1  -3  -4 5235.85 152.087   9
   1  -3   4 5290.72 137.298   9
  -1  -3  -4 4967.78 150.097   7
   1  -3   5 9782.53 248.352   6
  -1   3  -5 9954.93 246.699   5
   1  -3   5 10078.7 249.330   5
   1   3   5 10485.2 267.586   7
   1  -3   5 10267.6 250.710   2
   1   3   5 10629.6 255.791   4
  -1   3  -5 10179.6 254.873   4
  -1   3  -5 10051.4 262.363  13
  -1  -3  -5 10380.6 247.039  10
   1  -3   5 10474.4 257.482  13
   1  -3   5 10002.2 247.290   9
   1   3   6 5795.41 171.468   7
   1  -3   6 5861.02 153.592   5
  -1   3  -6 6022.64 152.038   5
   1  -3   6 5839.56 153.463   6
   1   3   6 5651.81 156.711   4
  -1   3  -6 5778.51 156.784   4
  -1  -3  -6 5844.10 155.442   2
   1  -3   6 5896.13 152.794   2
  -1  -3  -6 5836.60 151.497  10
  -1   3  -6 5737.28 167.018  13
   1   3   6 5837.62 171.252   9
   1  -3   6 5582.42 152.028   9
   1  -3   7 3929.25 114.353   5
   1  -3   7 3943.51 114.032   6
  -1   3  -7 3914.38 113.401   5
  -1   3  -7 3950.28 115.928   4
   1   3   7 3988.16 116.604   4
  -1  -3  -7 4042.59 114.050   2
   1  -3   7 3960.89 111.209   2
   1   3   7 4182.75 133.569   5
  -1  -3  -7 4201.19 114.192  10
  -1   3  -7 4080.43 128.213  13
   1   3   7 4269.62 136.507   7
  -1   3  -7 4039.42 115.111   9
   1  -3   7 4006.82 114.575   9
   1   3   7 4013.92 133.311   9
  -1   3  -8 1449.89 60.1653   5
   1  -3   8 1576.34 61.4212   5
   1   3   8 1356.29 75.2622   5
   1  -3   8 1384.85 57.9196   6
   1   3   8 1474.46 58.3062   4
  -1  -3  -8 1389.28 54.2962   2
  -1   3  -8 1339.91 55.1788   4
  -1   3  -8 1425.06 69.5763  13
   1   3   8 1377.22 74.7340  11
  -1  -3  -8 1583.77 60.6234  10
   1  -3   8 1491.19 60.5471   9
   1   3   8 1554.93 79.1029   7
  -1   3  -8 1590.92 60.7984   9
   1   3   8 1445.43 78.1897   9
  -1  -3  -8 1347.43 75.3736   9
   1  -3   9 3840.11 116.479   5
   1   3   9 4161.22 138.343   5
   1  -3   9 3760.60 115.104   6
  -1   3  -9 3873.53 117.775   5
  -1  -3  -9 3737.86 107.534   2
   1  -3   9 3926.70 104.732   1
  -1   3  -9 3872.30 111.813   4
  -1   3  -9 3899.01 129.196  13
  -1  -3  -9 4063.54 116.794  10
   1   3   9 3858.74 135.767  11
   1   3   9 4077.11 139.034   9
  -1  -3  -9 4002.77 136.861   9
   1   3   9 3959.44 138.663   7
  -1   3  -9 3950.21 117.758   9
   1  -3   9 4005.92 119.270   9
   1  -3  10 80.0323 32.7016   6
   1   3  10 128.326 53.2267   7
   1  -3  10 70.2816 38.9455   5
  -1  -3 -10 60.5201 22.6020   2
  -1   3 -10 105.665 26.9404   4
   1   3  10 51.7535 49.2698   5
   1  -3  10 64.7212 23.2265   1
  -1   3 -10 60.4622 41.1484  13
   1   3  10 121.680 48.8865  11
   1  -3  10 61.9201 40.1189   9
   1   3  10 103.237 53.3680   9
  -1   3 -10 82.1530 37.4951   9
  -1  -3 -10 129.358 51.6538   9
  -1  -3 -10 112.455 39.9139  10
   1  -3  11 218.581 39.7094   6
   1  -3  11 178.265 41.8333   5
   1   3  11 178.059 55.9423   7
   1  -3  11 165.036 23.2682   3
  -1   3 -11 190.786 27.4210   4
   1   3  11 228.886 57.7457   5
  -1  -3 -11 185.274 23.5007   1
   1  -3  11 196.172 22.9491   1
   1   3  11 159.975 54.2126  11
  -1   3 -11 161.295 45.2860  13
  -1  -3 -11 238.063 43.2281  10
   1  -3  11 264.133 44.4984   9
  -1   3 -11 225.558 43.5619   9
  -1  -3 -11 157.122 57.7831   9
   1  -3  11 251.828 54.3335  10
   1   3  11 251.935 59.6428   9
   1  -3  12 146.586 44.4414   5
   1   3  12 201.772 61.5755   7
   1  -3  12 181.968 39.3884   6
  -1  -3 -12 95.8892 19.3107   1
   1  -3  12 156.036 18.7618   1
  -1  -3 -12 141.508 19.4429   1
   1  -3  12 124.059 18.8424   3
   1   3  12 280.546 60.6545   5
  -1   3 -12 143.708 46.0713   5
  -1   3 -12 129.832 46.5291  13
   1   3  12 163.288 59.9260  11
   1  -3  12 233.060 54.0323  10
  -1  -3 -12 191.541 47.3793  10
  -1   3 -12 83.2401 43.7967   9
   1   3  12 215.343 62.9270   9
   1  -3  12 160.050 46.2866   9
  -1  -3 -12 128.312 60.2587   9
   1   3  13 30.0007 60.5973   7
   1  -3  13 47.6198 39.0531   6
   1  -3  13-51.1080 46.7650   5
   1   3  13-3.63636 59.1129   5
  -1   3 -13-20.8613 46.0427   5
   1   3  13 21.3552 55.3678  11
  -1   3 -13 51.7755 45.1070  13
   1   3  13 50.6338 63.6286   9
  -1   3 -13 47.0430 46.0216   9
   1  -3  13 91.4623 49.0533   9
  -1  -3 -13-54.6489 62.0137   9
   1  -3  13 86.4530 55.3708  10
   1   3  14 354.215 73.4854   7
   1   3  14 610.250 74.0373   5
   1  -3  14 378.096 52.8085   5
   1  -3  14 446.375 49.2904   6
   1   3  14 515.786 73.8739  11
  -1   3 -14 426.403 57.7309  13
   1  -3  14 479.583 66.2541  10
   1  -3  14 510.995 59.4756   9
   1   3  14 488.820 78.8286   9
  -1   3 -14 535.531 58.2071   9
  -1  -3 -14 422.757 74.1292   9
   1   3  15 223.648 66.3365   5
   1   3  15 64.2567 68.0631   7
   1  -3  15-46.7366 52.0021   5
   1  -3  15 31.6182 44.8799   6
  -1   3 -15 35.9053 50.4277  13
   1  -3  15 27.0363 63.8009  10
   1  -3  15 57.4487 55.7073   9
  -1  -3 -15-64.4730 68.1618   9
   1   3  15 63.1609 70.5111   9
  -1   3 -15 5.18544 51.5617   9
   1   3  16 159.929 73.2933   7
   1   3  16 91.1928 69.7374   5
   1  -3  16 82.1982 53.6392   5
  -1   3 -16 162.334 53.7895  13
  -1   3 -16 122.176 56.1228   9
  -1  -3 -16 224.259 72.1247   9
  -1   4  16 54.3020 68.9869   7
  -1  -4  16 43.8666 58.7147   6
  -1   4  16 56.3566 69.7103   5
   1   4 -16 66.3660 45.8320  13
   1  -4 -16 32.2370 49.9015  13
   1  -4 -16-9.05480 63.0758  10
   1  -4 -16 4.23793 72.3884   9
  -1   4  15 62.2988 67.4698   7
  -1  -4  15 53.5963 38.4143   5
  -1  -4  15-24.9027 56.0504   6
  -1   4  15 4.07272 67.3682   5
   1   4 -15-2.81675 44.6381  13
   1  -4 -15 21.3829 50.1824  13
   1  -4 -15-4.22073 71.1584   9
   1  -4 -15 8.71501 59.7857  10
  -1  -4  15 24.1539 41.7443   9
  -1  -4  14 86.0437 53.6012   6
  -1   4  14 17.3857 63.5311   7
  -1  -4  14 30.9763 34.9621   5
   1  -4 -14 44.2697 23.9205   3
  -1  -4  14 3.22460 23.9797   1
  -1  -4  14 20.4935 23.2629   1
   1  -4 -14 19.2524 23.5033   1
  -1   4  14 4.08373 69.0763   5
   1  -4 -14-3.12962 45.6800  13
   1   4 -14 2.92904 44.4130  13
  -1   4  14-4.48931 63.1759  11
  -1  -4  14 61.7605 58.7814  10
   1  -4 -14 27.6815 56.8024  10
   1  -4 -14 20.6878 63.3288   9
  -1  -4  14 65.2015 39.4667   9
  -1  -4  13 762.857 64.7177   6
  -1   4  13 685.573 75.1582   7
  -1  -4  13 724.533 46.6111   5
   1  -4 -13 685.212 38.2412   3
   1  -4 -13 776.843 38.6431   1
  -1   4  13 814.647 81.2359   5
  -1  -4  13 708.775 39.3273   1
  -1  -4  13 761.921 38.1045   1
  -1   4  13 671.907 76.8174  11
   1  -4 -13 834.137 65.3748  13
   1   4 -13 730.120 59.6359  13
   1  -4 -13 886.205 66.6225  10
  -1  -4  13 914.533 75.2679  10
   1  -4 -13 720.329 77.9980   9
  -1  -4  13 832.491 50.3530   9
  -1   4  12 188.418 59.4533   7
  -1  -4  12 160.546 48.5224   6
  -1  -4  12 76.1691 33.3705   5
  -1   4  12 160.441 64.0889   5
  -1   4  12 164.149 35.9412   4
   1  -4 -12 131.751 30.6856   1
  -1  -4  12 199.483 31.8067   2
   1   4 -12 214.439 45.7510  13
  -1   4  12 99.6346 61.2294  11
   1  -4 -12 215.815 48.8407  13
   1  -4 -12 173.997 59.9047   9
  -1  -4  12 185.752 35.6118   9
   1  -4 -12 183.868 52.0774  10
  -1   4  11 153.979 55.5471   7
  -1  -4  11 123.224 32.0325   5
  -1  -4  11 152.756 47.8717   6
  -1   4  11 109.117 34.1545   4
  -1  -4  11 129.599 31.7598   2
   1   4 -11 89.1953 32.0153   5
   1  -4 -11 110.780 32.4601   1
   1   4 -11 178.074 44.0821  13
  -1   4  11 114.810 56.0490  11
   1  -4 -11 176.913 47.2007  13
   1  -4 -11 160.902 47.9557  10
   1  -4 -11 192.987 58.9883   9
  -1  -4  11 113.927 32.3391   9
  -1   4  10 4071.20 142.910   7
  -1  -4  10 3847.02 110.475   5
  -1  -4  10 4090.74 131.423   6
   1   4 -10 3669.68 109.310   5
   1   4 -10 3890.77 121.268   4
  -1  -4  10 4050.73 116.909   2
  -1   4  10 4012.70 120.279   4
   1  -4 -10 3871.93 111.948   1
  -1   4  10 3997.95 142.194  11
   1   4 -10 3798.07 131.236  13
   1  -4 -10 4140.61 126.028  10
  -1  -4  10 3963.01 110.660   9
   1  -4 -10 3791.81 140.795   9
   1   4  -9 873.672 42.0640   5
  -1  -4   9 1052.79 62.6817   6
  -1   4   9 982.883 70.5514   7
  -1  -4   9 876.784 44.3891   5
   1   4  -9 885.591 53.8212   4
  -1   4   9 912.968 52.4090   4
  -1  -4   9 944.450 50.8374   2
   1  -4  -9 995.322 48.0431   2
  -1   4   9 896.938 65.1314  11
   1   4  -9 782.403 58.5480  13
  -1  -4   9 904.478 55.6310  12
   1  -4  -9 971.924 56.0418  10
  -1  -4   9 917.323 43.1204   9
   1  -4  -9 968.681 66.4228   7
   1  -4  -9 778.198 67.3086   9
   1   4  -8 149.847 25.1917   5
  -1   4   8 138.118 47.3958   7
   1  -4  -8 187.681 45.7846   7
  -1  -4   8 145.113 40.7974   6
   1   4  -8 165.448 34.9462   4
   1  -4  -8 109.794 30.2942   2
  -1   4   8 126.224 33.3426   4
  -1  -4   8 197.721 37.0749   2
   1   4  -8 97.5997 39.1982  13
  -1  -4   8 164.151 33.3269  13
  -1   4   8 118.850 42.7769  11
  -1  -4   8 164.103 34.5732  12
  -1  -4   8 172.697 25.9219   9
   1  -4  -8 200.323 38.9866  10
   1  -4  -8 178.716 49.5410   9
  -1   4   7 3343.64 123.442   7
  -1  -4   7 3752.84 107.759   7
   1   4  -7 3661.45 96.3951   5
  -1  -4   7 3660.60 117.749   6
  -1   4   7 3232.23 111.027   4
   1   4  -7 3483.62 114.855   4
  -1  -4   7 3691.32 112.659   2
   1  -4  -7 3431.24 108.007   2
   1   4  -7 3575.56 120.637  13
  -1  -4   7 3721.22 114.002  13
   1  -4  -7 3594.00 110.611  10
  -1  -4   7 3470.88 108.492  12
  -1   4   7 3674.77 123.198  11
  -1  -4   7 3583.47 97.0709   9
   1  -4  -7 3525.60 123.662   7
  -1  -4   6 6028.65 167.386   6
  -1  -4   6 5808.86 156.486   7
  -1   4   6 5777.30 172.981   7
   1   4  -6 5776.74 145.400   5
   1  -4  -6 5929.01 160.011   2
   1   4  -6 6007.33 167.079   4
  -1  -4   6 5879.84 162.521   2
  -1   4   6 5557.39 163.492   4
   1   4  -6 5754.27 170.096  13
  -1  -4   6 5623.54 156.312  12
  -1  -4   6 5925.18 165.335  13
   1  -4  -6 5604.53 171.354  11
  -1   4   6 5750.39 148.229   8
  -1  -4   6 5675.80 145.588   9
   1   4  -5 1373.21 46.9133   5
   1   4  -5 1338.28 59.3165   6
  -1  -4   5 1339.14 62.0437   6
  -1   4   5 1315.19 66.5339   7
  -1  -4   5 1447.84 56.7688   7
   1   4  -5 1232.37 62.7173   4
  -1  -4   5 1278.56 59.6466   2
   1  -4  -5 1348.18 59.3099   2
  -1   4   5 1443.15 63.8606   4
   1   4  -5 1240.15 64.3312  13
  -1  -4   5 1301.61 62.7549  13
   1  -4  -5 1268.97 63.4673  11
  -1  -4   5 1277.66 55.2527  12
   1  -4  -5 1453.76 68.9659  13
  -1   4   5 1393.32 45.1574   8
   1  -4  -5 1161.55 64.4786   9
  -1  -4   5 1289.17 46.4996   9
  -1  -4   4 346.072 32.7482   7
   1   4  -4 391.666 27.8442   5
   1   4  -4 375.911 36.2890   6
  -1  -4   4 285.212 36.2437   6
   1  -4  -4 471.321 37.9109   2
   1   4  -4 363.660 40.4024   4
  -1   4   4 330.293 37.3817   4
  -1  -4   4 351.760 38.0573   2
  -1  -4   4 374.246 24.8112  11
   1   4  -4 375.856 38.3236  13
  -1  -4   4 380.313 38.6432  13
  -1  -4   4 297.910 31.4458  12
   1  -4  -4 379.046 37.4841  11
   1  -4  -4 344.329 39.7759  13
  -1   4   4 350.776 19.9468   8
   1  -4  -4 286.842 39.2127   9
   1  -4  -3 4612.38 141.994   7
   1   4  -3 4778.94 136.374   6
  -1  -4   3 4565.08 138.990   6
   1   4  -3 4621.71 127.295   5
  -1  -4   3 4617.94 132.535   7
  -1  -4   3 4753.24 139.070   4
  -1   4   3 4833.72 140.062   4
  -1  -4   3 4694.24 129.475  12
  -1  -4   3 4826.52 123.193  11
   1   4  -3 4115.42 140.322  13
   1  -4  -3 4537.58 137.125  11
   1   4  -3 4938.91 128.580  12
  -1  -4   3 5028.89 145.390  13
   1  -4  -3 4635.42 141.870   9
  -1  -4   2 748.967 43.4883   7
   1   4  -2 766.067 42.5148   7
  -1  -4   2 816.604 48.2854   6
   1  -4  -2 683.526 47.5982   7
  -1   4   2 710.398 45.3110   4
  -1  -4   2 743.319 46.0821   4
  -1  -4   2 713.040 39.4893  12
  -1  -4   2 693.708 33.6817  11
   1   4  -2 749.419 39.6813  12
  -1  -4   2 703.559 49.5748  13
  -1   4   2 736.478 49.0668  13
   1  -4  -2 814.986 44.8978  11
  -1  -4   1 878.536 47.0393   7
   1  -4  -1 723.734 48.2699   7
   1   4  -1 839.120 46.0274   7
   1   4  -1 715.662 47.3952   4
  -1   4   1 820.413 47.6355   4
  -1  -4   1 921.844 55.4405  13
   1   4  -1 882.542 43.5351  12
   1   4  -1 890.801 38.5977  11
  -1  -4   1 903.326 38.7499  11
   1  -4  -1 770.272 43.4988  11
  -1   4   1 808.148 44.3174  11
  -1   4   1 843.576 53.2666  13
  -1  -4   1 859.471 44.4058   9
   1  -4  -1 837.723 25.8065   8
  -1  -4   0 7899.31 204.948   7
   1  -4   0 7704.91 205.251   7
  -1   4   0 7605.79 206.377   4
   1   4   0 7575.61 207.310   4
   1   4   0 7731.89 194.756  11
  -1   4   0 7634.53 197.536  11
  -1   4   0 7504.86 212.663  13
   1   4   0 7894.34 199.543  12
   1  -4   0 7796.59 198.985  11
  -1  -4   0 7762.19 195.175  11
  -1   4   0 7469.86 191.161  12
  -1  -4   0 7584.67 177.671   8
  -1  -4   0 7778.58 201.801   9
  -1   4  -1 16828.6 406.989   5
   1  -4   1 17288.7 411.371   7
  -1  -4  -1 16868.4 411.908   7
   1   4   1 16096.3 413.892   6
  -1   4  -1 17259.3 409.452   6
   1   4   1 17158.5 414.121   4
   1  -4   1 16853.6 409.845   2
  -1  -4  -1 16922.8 404.125  11
  -1   4  -1 16269.3 419.951  13
   1   4   1 15963.7 402.816  11
   1  -4   1 16560.5 402.749  11
  -1   4  -1 16954.9 394.530  12
  -1  -4  -1 16982.1 410.411   9
  -1   4  -2 745.162 42.9962   5
   1  -4   2 804.908 47.7015   7
  -1   4  -2 783.177 44.5092   6
   1  -4   2 730.859 46.3386   2
   1   4   2 811.330 47.9124   4
   1   4   2 717.035 43.0956  11
  -1   4  -2 769.131 32.5992  12
  -1  -4  -2 748.102 43.2083  11
   1  -4   2 822.278 51.4303  13
   1  -4   2 909.823 42.5061  11
  -1  -4  -2 763.073 48.7967   7
  -1  -4  -2 792.925 48.9419   9
  -1   4  -3 35535.5 807.864   6
  -1   4  -3 34610.2 803.878   5
   1  -4   3 35473.0 811.898   7
  -1   4  -3 33060.5 814.227   4
   1   4   3 33983.7 815.361   4
   1  -4   3 34560.4 811.698   2
   1  -4   3 34799.7 804.245  11
   1  -4   3 35038.7 795.126  12
   1   4   3 33412.0 811.645  11
   1  -4   3 34505.0 817.664  13
  -1  -4  -3 34426.9 818.112   7
  -1  -4  -3 34512.0 817.211   9
  -1   4  -4 4708.39 131.818   6
  -1   4  -4 4695.12 129.720   5
  -1  -4  -4 4689.59 139.490   2
   1   4   4 4706.85 141.685   4
   1  -4   4 4753.96 136.914   2
  -1   4  -4 4775.00 141.274   4
   1  -4   4 4744.08 142.776  13
   1  -4   4 4795.17 123.488  12
  -1   4  -4 4982.35 151.169  13
  -1  -4  -4 4938.65 146.391   7
   1  -4   4 4800.53 129.348   9
  -1  -4  -4 4601.75 145.475   9
  -1   4  -5 94.2232 27.4378   5
  -1   4  -5 81.1555 26.9031   6
   1  -4   5 74.6618 29.0532   6
   1  -4   5 17.2054 29.4183   5
  -1   4  -5 63.2860 31.7673   4
   1   4   5 83.1519 31.8593   4
   1  -4   5 45.4892 30.3513   2
  -1  -4  -5 93.4021 31.1218   2
  -1   4  -5 69.8420 33.3244  13
   1  -4   5 63.9125 32.1397  13
   1  -4   5 43.9130 21.3869  12
  -1  -4  -5 65.7499 39.2738   9
   1  -4   5 120.977 27.2673   9
   1  -4   6 1274.87 55.6286   5
   1   4   6 1221.29 71.1870   7
  -1   4  -6 1163.71 50.4664   5
   1  -4   6 1120.36 53.8916   6
   1  -4   6 1228.76 55.3239   2
  -1  -4  -6 1197.63 57.4522   2
   1   4   6 1017.13 56.8871   4
  -1   4  -6 1168.44 58.9401   4
  -1  -4  -6 1148.64 51.3455  10
  -1   4  -6 1286.20 68.7554  13
   1  -4   6 1215.50 59.5359  13
   1  -4   6 1228.85 48.0132  12
  -1  -4  -6 1041.89 66.8116   9
   1   4   6 1293.15 71.5184   9
   1  -4   6 1082.69 49.4333   9
  -1   4  -7 15615.9 383.199   5
   1   4   7 16635.7 413.909   7
   1  -4   7 16111.1 389.242   6
   1  -4   7 15709.9 387.181   5
   1   4   7 16097.9 395.372   4
   1  -4   7 15609.6 387.326   2
  -1  -4  -7 16168.7 391.784   2
  -1   4  -7 15761.6 394.036   4
   1  -4   7 15555.2 382.082  12
  -1   4  -7 16163.7 408.166  13
  -1  -4  -7 16367.3 385.183  10
   1   4   7 16224.0 410.983   9
   1  -4   7 16092.2 384.380   9
   1  -4   8 863.934 49.9982   6
   1  -4   8 839.815 49.8959   5
   1   4   8 848.710 68.8018   7
  -1   4  -8 806.367 46.5692   5
   1  -4   8 877.691 48.6080   2
  -1   4  -8 847.844 49.9238   4
  -1  -4  -8 876.794 49.5050   2
   1   4   8 840.315 52.9459   4
  -1   4  -8 963.602 64.3183  13
  -1  -4  -8 957.952 50.4883  10
   1   4   8 952.892 66.5021  11
   1   4   8 753.541 69.5026   9
   1  -4   8 838.663 48.0260   9
   1   4   9 1200.95 81.4774   7
   1  -4   9 1205.33 59.5552   5
   1  -4   9 1272.29 60.4673   6
   1   4   9 1220.93 79.8728   5
  -1   4  -9 1178.96 58.9718   4
   1   4   9 1440.14 63.6327   4
   1  -4   9 1208.09 54.2629   2
  -1  -4  -9 1197.92 56.4727   2
  -1  -4  -9 1223.09 60.4496  10
  -1   4  -9 1376.65 75.2684  13
   1   4   9 1217.54 78.6495  11
  -1  -4  -9 965.355 76.0703   9
   1  -4   9 1287.35 60.7082   9
   1   4   9 1315.66 83.8700   9
   1  -4  10 195.329 41.5729   6
   1  -4  10 175.986 40.5252   5
   1   4  10 182.883 58.2651   7
  -1   4 -10 214.087 37.1726   4
   1  -4  10 156.413 32.8366   1
  -1  -4 -10 117.080 31.1232   2
   1   4  10 185.687 59.7375   5
   1   4  10 199.990 56.8696  11
  -1   4 -10 174.623 50.6249  13
  -1  -4 -10 139.138 58.2594   9
   1   4  10 212.385 59.9207   9
   1  -4  10 208.400 41.0662   9
  -1  -4 -10 230.470 43.4498  10
   1  -4  11 483.333 46.8384   5
   1  -4  11 460.576 46.3150   6
   1   4  11 433.604 67.1910   7
   1   4  11 540.306 69.4627   5
  -1  -4 -11 449.813 35.3985   2
  -1   4 -11 493.700 42.4140   4
   1  -4  11 456.778 36.0574   1
  -1   4 -11 466.668 57.9554  13
   1   4  11 404.505 64.5528  11
   1  -4  11 453.351 50.2565   9
  -1  -4 -11 527.136 51.6643  10
   1   4  11 486.534 71.3053   9
  -1  -4 -11 478.728 68.5232   9
   1   4  12 2303.45 111.594   5
   1  -4  12 2132.39 84.8708   6
   1  -4  12 2057.91 83.7400   5
   1   4  12 2149.42 112.632   7
  -1   4 -12 2205.00 86.9904   5
  -1  -4 -12 2068.85 66.5054   1
  -1   4 -12 2109.25 75.4941   4
   1  -4  12 2109.61 66.6979   1
  -1   4 -12 2101.70 98.6868  13
   1  -4  12 2262.43 96.5873  10
  -1  -4 -12 2264.91 88.1699  10
   1   4  12 2094.18 108.443  11
   1  -4  12 2185.97 87.7076   9
   1   4  12 2162.24 113.659   9
  -1  -4 -12 2218.79 109.623   9
   1  -4  13 84.6476 46.1834   5
   1  -4  13 127.210 46.5211   6
   1   4  13 122.705 67.1816   7
   1   4  13 166.834 65.1624   5
   1  -4  13 130.037 25.8391   1
   1  -4  13 102.475 25.5885   3
  -1  -4 -13 83.1069 26.8531   1
  -1   4 -13 44.8385 47.3503   5
  -1  -4 -13 97.7777 25.8948   1
   1   4  13 22.5303 59.8520  11
  -1   4 -13 148.088 54.5570  13
  -1  -4 -13 127.199 70.6510   9
   1  -4  13 118.234 47.7048   9
   1   4  13 96.4012 67.7231   9
  -1  -4 -13 166.165 51.9689  10
   1  -4  13 35.7238 59.4768  10
   1  -4  14-20.9504 44.3109   6
   1  -4  14 60.4905 45.4185   5
   1   4  14 129.974 69.2999   5
   1   4  14-9.66390 68.2106   7
  -1  -4 -14 19.0518 16.2872   1
  -1  -4 -14 35.5159 14.8617   3
   1  -4  14 34.4506 13.5838   1
   1  -4  14-26.8867 14.2932   1
  -1   4 -14-65.8422 49.3544   5
  -1  -4 -14 47.6790 14.8757   1
  -1   4 -14 40.8493 53.7222  13
   1   4  14-4.67195 70.8363   9
   1  -4  14 23.2405 49.1541   9
   1  -4  14 30.5598 61.5806  10
  -1  -4 -14-30.2046 70.2249   9
  -1  -4 -14 35.4866 55.4124  10
   1  -4  15 295.364 54.7856   5
   1  -4  15 254.235 50.4940   6
   1   4  15 304.545 78.4696   7
  -1  -4 -15 246.975 61.7086  13
  -1   4 -15 373.733 62.4161  13
   1  -4  15 207.535 55.6241   9
  -1  -4 -15 267.062 79.3745   9
   1   4  16 477.985 86.3182   7
  -1   4 -16 562.517 69.2168  13
  -1  -4 -16 550.291 69.3670  13
  -1  -4 -16 633.612 89.2007   9
  -1   5  15 495.168 82.0354   7
  -1  -5  15 563.788 68.6100   6
   1  -5 -15 458.230 34.4048   1
   1  -5 -15 394.575 33.9939   3
   1  -5 -15 504.106 64.3038  13
  -1  -5  15 464.485 69.8162  12
   1   5 -15 334.511 58.4988  13
   1  -5 -15 579.430 68.0428  10
   1  -5 -15 474.780 83.3729   9
  -1   5  14 344.714 75.5201   7
  -1  -5  14 220.395 60.4746   6
  -1   5  14 243.301 78.3177   5
  -1  -5  14 235.843 36.2645   1
  -1  -5  14 247.210 37.1012   1
   1  -5 -14 236.845 36.5699   3
   1  -5 -14 287.201 35.3063   1
   1  -5 -14 306.602 60.0585  13
   1   5 -14 299.600 57.2531  13
  -1  -5  14 253.166 61.1205  12
  -1  -5  14 224.871 41.1836   9
   1  -5 -14 322.271 63.0340  10
   1  -5 -14 253.517 74.6831   9
  -1  -5  13 245.725 55.6198   6
  -1   5  13 171.016 71.0411   7
  -1   5  13 66.1884 70.1238   5
  -1   5  13 166.017 42.1393   4
  -1  -5  13 165.971 37.1985   2
  -1  -5  13 148.709 55.2597  12
  -1   5  13 250.178 70.1017  11
   1  -5 -13 231.829 57.0382  13
   1   5 -13 191.914 54.3281  13
  -1  -5  13 161.546 36.9240   9
   1  -5 -13 182.227 70.7182   9
   1  -5 -13 156.784 57.5443  10
  -1  -5  12 98.1896 52.3878   6
  -1   5  12 72.0657 63.3884   7
   1   5 -12 28.7519 34.7382   5
  -1  -5  12 37.3271 35.6911   2
  -1   5  12 31.6859 38.9703   4
   1  -5 -12 80.2855 50.7917  13
  -1   5  12 4.38131 58.0547  11
  -1  -5  12 5.71097 48.9365  12
   1   5 -12 74.4540 50.3697  13
   1  -5 -12 62.2995 51.8297  10
  -1  -5  12 18.2360 33.2768   9
   1  -5 -12 52.3427 63.6683   9
  -1  -5  11 170.792 53.1914   6
  -1  -5  11 168.992 40.6281   7
  -1   5  11 126.839 63.2357   7
   1   5 -11 165.325 33.8198   5
   1   5 -11 121.974 43.3929   4
  -1  -5  11 56.7222 38.3832   2
  -1   5  11 77.1918 40.3575   4
   1  -5 -11 135.532 53.9219  13
  -1   5  11 71.3209 57.9736  11
   1   5 -11 171.720 51.9019  13
  -1  -5  11 110.560 47.2574  12
  -1  -5  11 102.762 33.4995   9
   1  -5 -11 74.4860 49.7587  10
   1  -5 -11 195.956 64.2061   9
  -1  -5  10 3926.38 123.600   7
  -1  -5  10 4071.09 136.428   6
  -1   5  10 3760.87 147.297   7
   1   5 -10 3940.51 110.936   5
   1   5 -10 3917.38 130.436   4
  -1   5  10 4205.77 129.896   4
  -1  -5  10 3920.41 124.261   2
   1   5 -10 4089.29 139.918  13
   1  -5 -10 4065.80 142.124  13
  -1  -5  10 3703.90 126.364  12
  -1   5  10 3950.69 147.009  11
   1  -5 -10 4048.33 128.539  10
  -1  -5  10 3965.19 112.348   9
   1  -5 -10 3936.06 149.005   9
  -1  -5   9 1432.46 76.2578   6
   1   5  -9 1373.20 52.9747   5
  -1   5   9 1345.90 86.9649   7
  -1  -5   9 1374.08 65.2099   7
  -1   5   9 1308.40 68.7779   4
   1   5  -9 1442.00 73.5614   4
  -1  -5   9 1328.84 67.1656   2
   1  -5  -9 1383.01 79.1684  13
   1  -5  -9 1540.62 70.4201  10
   1   5  -9 1381.07 78.0738  13
  -1  -5   9 1500.27 69.2225  13
  -1   5   9 1410.64 84.1966  11
  -1  -5   9 1344.58 69.1453  12
   1  -5  -9 1280.36 88.2628   9
  -1  -5   9 1283.94 54.0672   9
   1  -5  -9 1578.52 84.3621   7
  -1   5   9 1377.74 60.6864   8
   1   5  -8 1388.48 52.7421   5
  -1  -5   8 1485.75 75.9138   6
  -1  -5   8 1469.40 66.3972   7
  -1   5   8 1471.96 85.1320   7
  -1  -5   8 1413.10 70.2584   2
  -1   5   8 1302.24 68.0366   4
   1   5  -8 1183.11 68.9659   4
   1  -5  -8 1401.56 67.9934  10
   1  -5  -8 1532.58 80.2547  13
  -1  -5   8 1298.46 64.5822  12
  -1  -5   8 1527.93 71.6553  13
  -1   5   8 1387.49 79.4890  11
   1   5  -8 1346.03 77.2715  13
   1  -5  -8 1312.79 82.0794   7
  -1   5   8 1389.76 56.8358   8
  -1  -5   8 1449.35 54.1691   9
   1   5  -7 80.4631 25.3734   5
   1  -5  -7 77.6844 49.1514   7
  -1  -5   7 13.4226 34.3043   7
  -1   5   7 71.6716 45.4258   7
  -1  -5   7 97.9353 40.9800   6
  -1  -5   7 56.2632 38.3675   2
  -1   5   7 34.2415 34.4443   4
   1   5  -7 76.4423 40.2381   4
   1  -5  -7 53.5555 43.9132  13
  -1  -5   7 53.7728 39.4004  13
  -1  -5   7-4.24582 33.4931  12
   1   5  -7 28.5868 39.3539  13
  -1   5   7 60.3556 25.5011   8
  -1  -5   7 40.8123 26.3262   9
  -1   5   6 4424.33 148.850   7
  -1  -5   6 4485.53 132.539   7
   1   5  -6 4429.85 119.113   5
  -1  -5   6 4343.14 139.764   6
  -1  -5   6 4771.93 140.838   2
   1   5  -6 4320.27 141.218   4
  -1   5   6 4473.42 139.145   4
  -1  -5   6 4129.48 119.484  11
  -1  -5   6 4713.35 142.568  13
   1  -5  -6 4337.01 146.978  13
  -1  -5   6 4409.88 129.087  12
   1   5  -6 4339.24 146.548  13
   1  -5  -6 4288.90 144.755  11
  -1  -5   6 4307.43 119.055   9
  -1   5   6 4417.53 114.401   8
   1  -5  -6 4217.20 147.241   9
   1   5  -5 18697.6 442.800   5
  -1  -5   5 19151.6 455.426   7
   1   5  -5 18457.4 457.280   6
  -1  -5   5 19335.1 464.720   6
  -1   5   5 18757.7 470.187   7
   1   5  -5 19355.9 467.917   4
  -1  -5   5 18826.3 462.250   2
  -1   5   5 18735.8 463.927   4
   1   5  -5 18383.7 471.515  13
  -1  -5   5 18498.5 464.885  13
  -1  -5   5 18364.6 449.480  12
  -1  -5   5 18430.7 442.380  11
   1  -5  -5 18491.1 465.048  11
   1  -5  -5 18282.2 470.640  13
  -1   5   5 18727.8 431.812   8
   1  -5  -5 18424.9 469.835   9
   1   5  -4 4704.87 141.622   6
   1   5  -4 4543.62 129.572   5
  -1  -5   4 4446.27 138.236   7
  -1  -5   4 4605.34 146.187   6
   1  -5  -4 4700.74 151.999   7
   1   5  -4 4768.82 149.242   4
  -1  -5   4 4625.60 144.804   2
  -1   5   4 4748.08 147.133   4
   1  -5  -4 4650.61 145.421  11
  -1  -5   4 4696.75 133.805  12
   1   5  -4 4793.40 131.742  12
  -1  -5   4 4912.31 151.105  13
  -1  -5   4 4733.66 127.321  11
   1   5  -4 4379.32 149.847  13
   1  -5  -4 4952.50 151.458   9
   1  -5  -3 1774.35 79.5412   7
   1   5  -3 1551.23 64.9286   5
   1   5  -3 1674.58 74.2258   6
  -1  -5   3 1667.45 70.3628   7
  -1  -5   3 1675.88 76.2534   6
  -1   5   3 1744.31 76.6819   4
  -1  -5   3 1709.26 74.4533   2
   1  -5  -3 1672.60 73.4152  11
  -1  -5   3 1700.69 59.9680  11
   1   5  -3 1446.31 77.9276  13
  -1  -5   3 1634.16 65.2530  12
  -1  -5   3 1623.10 79.3531  13
   1   5  -3 1682.87 64.2997  12
   1  -5  -3 1704.36 77.4496   9
   1   5  -2 1825.44 76.6590   6
  -1  -5   2 1749.73 73.5247   7
   1  -5  -2 1597.76 75.9341   7
   1   5  -2 1792.00 73.5493   7
  -1  -5   2 1676.90 75.7685   2
  -1   5   2 1846.84 78.4917   4
   1   5  -2 1649.49 65.6012  12
  -1  -5   2 1813.01 83.7597  13
  -1  -5   2 1758.15 62.8065  11
   1  -5  -2 1724.92 72.1884  11
  -1   5   2 1779.14 83.5863  13
  -1  -5   2 1816.96 70.5231   9
   1  -5  -2 1732.59 76.7744   9
  -1  -5   1 7064.43 190.410   7
   1  -5  -1 7082.20 194.544   7
  -1   5   1 6874.19 194.220   4
   1   5  -1 6861.19 195.392   4
   1  -5  -1 7124.51 186.495  11
   1   5  -1 7146.11 183.056  12
  -1   5   1 6872.80 201.477  13
  -1  -5   1 7237.86 179.190  11
   1   5  -1 7159.52 178.054  11
   1  -5  -1 6276.90 157.527   8
  -1  -5   1 6899.52 187.077   9
  -1  -5   1 6850.43 162.527   8
   1  -5   0 958.438 57.0635   7
  -1   5   0 819.914 55.3264   6
  -1  -5   0 939.694 55.9544   7
   1   5   0 878.878 54.2977   4
  -1   5   0 822.984 55.1485   4
   1   5   0 719.486 46.7101  12
  -1   5   0 786.634 57.8126  13
  -1  -5   0 898.092 46.6156  11
  -1   5   0 768.108 41.1518  12
  -1   5   0 779.767 45.8584  11
   1   5   0 857.705 45.9753  11
   1  -5   0 812.143 47.2582  11
  -1  -5   0 772.999 50.1045   9
  -1  -5  -1 1775.41 76.6908   7
  -1   5  -1 1718.94 74.8093   6
   1  -5   1 1746.21 75.2562   7
   1   5   1 1664.12 75.6118   4
  -1   5  -1 1692.52 80.7837  13
   1   5   1 1783.46 68.5879  11
  -1   5  -1 1751.45 60.0570  12
  -1  -5  -1 1629.46 68.2598  11
   1  -5   1 1693.20 68.2347  11
   1   5   1 1776.62 73.1550  12
  -1  -5  -1 1726.46 73.9893   9
  -1   5  -2 473.481 43.6832   6
  -1  -5  -2 552.446 48.5998   7
   1  -5   2 586.587 47.7379   7
  -1   5  -2 535.158 41.2769   5
   1   5   2 647.244 54.1981   6
   1   5   2 565.610 49.1391   4
   1  -5   2 599.715 46.8131   2
   1  -5   2 493.983 39.8324  11
   1  -5   2 674.710 52.7639  13
  -1  -5  -2 528.586 43.1643  11
  -1   5  -2 513.297 32.0248  12
  -1  -5  -2 579.972 49.3471   9
  -1   5  -3 412.643 38.5327   5
  -1  -5  -3 324.684 43.4566   7
  -1   5  -3 325.391 38.1921   6
   1  -5   3 386.236 44.0023   7
   1   5   3 348.873 43.0917   4
  -1   5  -3 363.855 43.5944   4
   1  -5   3 405.268 43.3221   2
   1  -5   3 389.294 46.5075  13
   1  -5   3 323.790 34.7203  11
  -1   5  -3 369.255 27.5286  12
  -1  -5  -3 344.980 41.7550   9
   1  -5   4 10.5563 35.0902   7
  -1   5  -4-26.3922 32.3819   6
  -1  -5  -4-25.7852 39.4660   7
  -1   5  -4 37.2958 28.1980   5
   1   5   4 18.2487 35.5749   4
  -1   5  -4 30.4258 33.5816   4
   1  -5   4-7.83670 30.4850   2
  -1  -5  -4 30.0952 40.3322  13
   1  -5   4 11.7077 22.4804  12
   1  -5   4 6.19181 36.7858  13
  -1   5  -4-11.3984 38.1043  13
   1  -5   4 15.8189 29.0297  11
   1   5   4 38.9969 36.9057  11
   1   5   4 16.3483 9.65368   8
   1  -5   4 33.8013 28.0524   9
  -1  -5  -4-16.1632 37.3769   9
  -1   5  -5 320.370 38.0276   6
   1   5   5 268.495 47.3237   7
  -1   5  -5 235.829 34.1357   5
  -1  -5  -5 226.090 47.5862   7
   1  -5   5 336.946 43.1048   7
  -1   5  -5 274.125 45.4858   4
   1   5   5 320.353 44.9389   4
   1  -5   5 232.659 40.8823   2
   1   5   5 197.379 42.9259  11
   1  -5   5 246.628 28.6411  12
  -1   5  -5 227.659 48.7622  13
  -1  -5  -5 330.345 50.7726  13
   1  -5   5 244.780 43.8290  13
  -1  -5  -5 181.622 45.7742   9
   1  -5   5 254.772 33.5854   9
   1  -5   6 4402.63 134.163   6
   1   5   6 4404.71 152.514   7
  -1   5  -6 4223.11 138.404   4
   1   5   6 4131.55 138.648   4
   1  -5   6 4618.07 136.097   2
  -1   5  -6 4507.12 152.717  13
   1  -5   6 4548.07 121.749  12
  -1  -5  -6 4151.05 151.142  13
   1  -5   6 4343.90 139.934  13
  -1  -5  -6 4561.62 150.845   9
   1  -5   6 4429.16 125.719   9
   1  -5   7 3251.17 107.795   6
   1   5   7 3071.61 125.433   7
  -1   5  -7 3038.10 111.218   4
   1   5   7 3392.57 114.775   4
   1  -5   7 3035.13 106.095   2
  -1   5  -7 3283.98 126.201  13
  -1  -5  -7 3380.79 102.787  10
   1  -5   7 3110.04 96.0793  12
   1  -5   7 3265.10 113.037  13
  -1  -5  -7 3158.93 125.620  13
  -1  -5  -7 2947.36 121.414   9
   1  -5   7 3260.17 99.7998   9
   1   5   7 3196.53 125.294   9
   1  -5   8 429.906 47.6031   5
   1  -5   8 394.272 46.3589   6
   1   5   8 358.245 63.9394   7
  -1   5  -8 451.560 48.6156   4
   1   5   8 374.669 48.0555   4
   1  -5   8 439.807 44.7050   2
   1  -5   8 322.633 36.8321  12
  -1  -5  -8 313.189 58.1763  13
  -1   5  -8 404.630 56.3624  13
   1  -5   8 449.617 43.3880   9
  -1  -5  -8 352.791 44.3769  10
   1   5   8 389.783 63.6528   9
   1   5   9 919.880 78.8376   7
   1  -5   9 734.398 55.1645   6
   1  -5   9 998.157 59.4596   5
   1   5   9 969.620 62.8994   4
  -1   5  -9 872.208 59.9077   4
   1  -5   9 975.748 56.0197   2
   1   5   9 918.671 78.5207   5
  -1   5  -9 983.369 75.1885  13
   1  -5   9 804.204 51.3967  12
  -1  -5  -9 871.996 73.5446  13
  -1  -5  -9 968.894 56.8085  10
   1   5   9 829.765 77.5421   9
   1  -5   9 841.668 53.3977   9
   1  -5  10 297.365 46.0298   6
   1   5  10 184.505 63.8774   7
   1  -5  10 264.515 45.2147   5
   1   5  10 296.757 49.0509   4
   1   5  10 181.173 64.8808   5
   1  -5  10 269.138 41.4354   2
  -1   5 -10 260.898 45.2765   4
   1   5  10 226.441 60.5375  11
  -1  -5 -10 150.673 57.9268  13
  -1   5 -10 361.485 60.8613  13
   1  -5  10 319.741 44.1898  12
  -1  -5 -10 340.991 47.7380  10
  -1  -5 -10 383.347 68.0390   9
   1  -5  10 314.586 44.1071   9
   1   5  10 275.906 68.5605   9
   1  -5  11 3530.85 118.483   5
   1   5  11 3820.51 148.668   5
  -1   5 -11 3839.35 117.153   5
   1  -5  11 3736.23 120.889   6
   1   5  11 3667.05 149.160   7
  -1   5 -11 3538.30 120.116   4
   1  -5  11 3795.45 111.251   1
  -1  -5 -11 3761.09 119.853  10
  -1   5 -11 3859.00 143.456  13
  -1  -5 -11 3611.22 141.060  13
   1  -5  11 3334.16 117.490  12
   1   5  11 3497.89 143.430  11
   1   5  11 3754.65 148.125   9
   1  -5  11 3856.31 119.183   9
  -1  -5 -11 3584.70 146.366   9
   1  -5  12 83.6194 44.5423   6
   1   5  12 39.2569 65.5063   7
   1  -5  12 98.0445 46.3018   5
  -1   5 -12 155.038 45.7935   5
   1  -5  12 7.17547 36.8798   1
  -1   5 -12 100.629 40.1502   4
   1   5  12 40.2399 67.8202   5
  -1  -5 -12 55.1219 56.7112  13
   1   5  12 119.043 63.8493  11
   1  -5  12 115.125 46.7697  12
  -1   5 -12 114.849 58.5560  13
  -1  -5 -12 133.223 65.0344   9
  -1  -5 -12 89.3370 48.7910  10
   1   5  12 163.129 73.3334   9
   1  -5  12 118.483 47.7915   9
   1   5  13 100.570 72.0566   7
   1  -5  13 101.273 47.2654   5
   1  -5  13 173.307 47.6495   6
  -1   5 -13 181.637 41.7625   4
   1   5  13 179.649 75.7917   5
  -1   5 -13 154.839 47.2109   5
   1  -5  13 145.535 33.9636   1
   1  -5  13 115.386 52.0585  12
  -1  -5 -13 152.421 59.5803  13
  -1   5 -13 135.380 62.2873  13
  -1  -5 -13 68.3347 70.6370   9
   1  -5  13 203.512 49.2796   9
   1  -5  13 183.697 65.0742  10
  -1  -5 -13 95.9690 51.2037  10
   1   5  13 243.942 76.7149   9
   1   5  14 3070.66 142.119   7
   1  -5  14 2957.94 104.931   6
   1  -5  14 2762.16 104.184   5
  -1   5 -14 2855.59 105.444   5
  -1  -5 -14 2600.75 83.1161   1
   1  -5  14 2895.88 82.9872   1
  -1  -5 -14 2835.32 83.2161   1
  -1   5 -14 3010.55 126.959  13
  -1  -5 -14 3125.42 111.293  10
   1  -5  14 2864.42 111.054  12
  -1  -5 -14 3296.34 130.647  13
   1  -5  14 3180.72 109.196   9
  -1  -5 -14 2917.05 137.100   9
   1   5  15 301.669 81.8814   7
  -1  -5 -15 276.160 27.0723   1
  -1  -5 -15 174.530 27.8719   1
  -1  -5 -15 230.065 26.6285   3
  -1  -5 -15 305.484 70.2644  13
   1  -5  15 330.874 60.5284  12
  -1   5 -15 244.818 66.9383  13
  -1  -5 -15 280.269 61.9647  10
  -1  -5 -15 214.772 81.4489   9
  -1  -6  15 1135.00 82.0233   6
  -1   6  15 1329.80 109.418   7
   1  -6 -15 1174.33 54.6106   1
   1  -6 -15 1119.62 55.4307   3
   1   6 -15 1351.94 86.4686  13
   1  -6 -15 1228.57 86.4038  13
   1  -6 -15 1442.18 86.5218  10
  -1  -6  15 1109.38 84.4521  12
  -1   6  15 1172.77 76.8431   8
   1  -6 -15 1216.66 103.809   9
  -1   6  14-56.2152 76.7456   7
  -1  -6  14 9.85367 48.4052   7
  -1  -6  14 27.3510 61.2052   6
  -1  -6  14 61.5232 39.6005   2
  -1   6  14 32.5535 47.2969   4
   1  -6 -14 4.66459 40.7997   1
  -1  -6  14 26.0653 56.9479  12
   1   6 -14 27.2810 57.7118  13
   1  -6 -14 24.0231 64.7781  13
  -1   6  14-2.69122 50.1583   8
   1  -6 -14 92.5353 77.9442   9
   1  -6 -14 79.1260 62.3012  10
  -1   6  13 271.485 76.9971   7
  -1  -6  13 390.442 54.3936   7
  -1  -6  13 279.131 62.6169   6
   1  -6 -13 341.130 49.1194   1
   1   6 -13 361.076 40.8462   5
  -1  -6  13 475.591 50.1924   2
  -1   6  13 365.217 81.6193   5
  -1   6  13 306.809 52.9882   4
   1  -6 -13 313.685 64.5433  13
  -1  -6  13 471.656 63.4231  12
   1   6 -13 512.962 67.0454  13
  -1  -6  13 378.662 42.0184   9
  -1   6  13 386.000 54.9452   8
   1  -6 -13 381.098 82.2056   9
   1  -6 -13 331.474 61.6676  10
  -1   6  12 1261.57 100.109   7
  -1  -6  12 1402.86 85.6034   6
  -1  -6  12 1324.37 72.9893   7
   1   6 -12 1185.13 56.7211   5
   1  -6 -12 1339.81 68.7610   1
  -1  -6  12 1381.95 70.9293   2
   1   6 -12 1379.95 77.6054   4
  -1   6  12 1354.31 76.5534   4
  -1   6  12 1320.84 94.9757  11
  -1  -6  12 1305.18 78.5422  12
   1  -6 -12 1341.68 88.3013  13
   1  -6 -12 1333.93 78.6943  10
   1   6 -12 1222.65 84.3428  13
   1  -6 -12 1390.43 99.7103   9
  -1   6  12 1542.59 71.2161   8
  -1  -6  12 1435.66 59.7698   9
   1   6 -11 30.3782 32.6549   5
  -1  -6  11 48.4242 54.6783   6
  -1  -6  11 56.6417 43.8367   7
  -1   6  11 9.61914 66.3893   7
  -1  -6  11-2.64828 44.3064   2
  -1   6  11-9.37749 48.3529   4
   1   6 -11 39.0987 47.2074   4
   1  -6 -11 16.5034 39.7078   2
  -1   6  11 44.5389 59.7424  11
   1   6 -11 4.14285 54.5974  13
   1  -6 -11-20.7140 55.2798  13
  -1  -6  11 5.58757 47.3106  12
   1  -6 -11 84.0952 65.3301   9
  -1  -6  11 23.9318 34.3898   9
   1  -6 -11 96.5681 52.3513  10
  -1  -6  10 20.8428 42.3061   7
  -1  -6  10 72.8071 54.1879   6
   1  -6 -10 28.9770 59.7077   7
  -1   6  10-18.7144 65.7365   7
   1   6 -10 17.5028 30.9401   5
   1  -6 -10 7.57184 41.4192   2
   1   6 -10-10.2127 49.6163   4
  -1  -6  10-2.81726 45.5290   2
  -1   6  10-29.0037 45.4253   4
  -1  -6  10 103.528 47.1061  12
   1   6 -10-8.35990 52.6561  13
   1  -6 -10 8.30767 57.1513  13
  -1  -6  10 126.379 45.4071  13
  -1   6  10 38.4331 58.2673  11
   1  -6 -10 61.6501 49.3608  10
   1  -6 -10 59.4168 69.3944   9
  -1  -6  10 44.0571 33.3253   9
   1   6  -9 5371.48 140.916   5
  -1  -6   9 5265.76 158.283   7
  -1   6   9 5017.91 181.524   7
  -1  -6   9 5329.69 170.520   6
   1  -6  -9 5188.36 157.818   2
  -1   6   9 5360.09 167.981   4
  -1  -6   9 5381.61 163.978   2
   1   6  -9 5334.95 170.303   4
   1   6  -9 5449.53 177.882  13
  -1  -6   9 5647.17 165.951  13
  -1  -6   9 5408.66 157.687  12
   1  -6  -9 5238.95 176.784  13
  -1  -6   9 4655.09 143.928  11
   1  -6  -9 5562.45 159.863  10
  -1   6   9 5003.02 141.610   8
   1  -6  -9 5631.77 180.133   7
  -1  -6   9 5430.48 142.751   9
  -1  -6   8 76.0727 50.9841   6
  -1  -6   8 53.0641 42.0988   7
  -1   6   8 4.39284 57.9940   7
   1  -6  -8-4.04920 55.1549   7
   1   6  -8 65.2963 29.5479   5
  -1  -6   8-24.4984 44.7615   2
  -1   6   8-9.88591 43.5053   4
   1   6  -8 28.6407 49.2555   4
   1  -6  -8 11.2705 42.8959   2
  -1  -6   8 48.1559 46.6507  13
  -1  -6   8 8.74241 30.9037  11
   1  -6  -8-29.0456 55.6564  13
  -1  -6   8 11.9822 39.9572  12
   1   6  -8 29.4680 50.3512  13
  -1   6   8 23.4741 25.8567   8
  -1  -6   8 11.5351 30.7088   9
   1  -6  -8-39.1656 44.5837  10
  -1  -6   7 6581.96 183.038   7
  -1   6   7 6677.29 204.219   7
  -1  -6   7 6163.98 189.754   6
   1   6  -7 6214.78 164.693   5
  -1  -6   7 6480.18 188.220   2
   1  -6  -7 6153.80 183.560   2
  -1   6   7 6102.65 188.120   4
   1   6  -7 6315.60 193.969   4
  -1  -6   7 6400.04 176.348  12
   1  -6  -7 6330.50 199.831  13
  -1  -6   7 6059.90 166.107  11
   1   6  -7 6201.32 199.208  13
  -1  -6   7 6400.40 190.640  13
   1  -6  -7 6028.21 199.771   9
  -1   6   7 6104.45 155.665   8
  -1  -6   7 6473.26 164.959   9
  -1  -6   6 1053.49 64.0732   7
  -1  -6   6 1127.62 73.1396   6
   1   6  -6 1097.78 65.6834   6
  -1   6   6 966.663 74.6478   7
   1   6  -6 1167.07 52.3359   5
   1  -6  -6 1012.22 66.5075   2
  -1   6   6 985.373 68.8011   4
  -1  -6   6 1103.58 69.2087   2
   1   6  -6 930.295 70.3410   4
   1   6  -6 1007.05 75.7755  13
   1  -6  -6 1073.61 70.7844  11
  -1  -6   6 1069.72 50.4795  11
   1  -6  -6 941.008 72.0671  13
  -1  -6   6 1100.98 71.5544  13
  -1  -6   6 1123.08 59.3262  12
  -1  -6   6 1166.37 53.2933   9
  -1   6   6 1021.10 34.8621   8
   1  -6  -6 1153.34 80.4093   9
   1   6  -5 2479.61 97.5447   6
  -1   6   5 2525.18 107.362   7
  -1  -6   5 2175.29 100.018   6
  -1  -6   5 2531.76 96.3086   7
   1   6  -5 2414.63 84.1818   5
   1   6  -5 2623.98 106.586   4
   1  -6  -5 2566.29 101.069   2
  -1   6   5 2511.21 103.430   4
  -1  -6   5 2552.12 102.315   2
  -1  -6   5 2399.58 104.531  13
   1  -6  -5 2511.85 103.066  11
  -1  -6   5 2525.64 82.1717  11
   1   6  -5 2448.51 110.170  13
   1  -6  -5 2378.67 107.165  13
  -1  -6   5 2414.11 87.9740  12
  -1   6   5 2577.32 102.212  11
   1  -6  -5 2197.16 104.357   9
   1   6  -4 334.187 47.5033   6
  -1  -6   4 325.717 47.9082   7
   1   6  -4 308.952 39.9098   5
  -1   6   4 317.231 53.3745   7
   1  -6  -4 340.472 55.7855   7
  -1   6   4 277.872 48.4089   4
   1  -6  -4 307.733 50.1785   2
   1   6  -4 336.657 52.6349   4
  -1  -6   4 441.843 53.6735   2
   1   6  -4 393.652 55.1118  13
   1  -6  -4 306.995 46.2021  11
  -1  -6   4 361.320 35.5173  11
  -1   6   4 349.467 50.3731  11
  -1  -6   4 350.448 40.6621  12
   1   6  -4 291.663 36.8771  12
  -1  -6   4 475.413 59.0326  13
   1  -6  -4 403.549 55.0340  13
   1  -6  -4 403.252 55.9080   9
   1  -6  -3 8073.76 230.548   7
  -1  -6   3 7669.84 220.274   7
  -1   6   3 8136.21 231.294   7
   1   6  -3 8299.63 226.382   6
   1  -6  -3 7169.23 221.305   2
  -1  -6   3 8325.65 229.269   2
  -1   6   3 7951.44 229.479   4
   1  -6  -3 7361.04 233.503  13
   1  -6  -3 7901.22 223.708  11
  -1   6   3 8437.77 222.918  11
   1   6  -3 7884.71 210.171  12
   1   6  -3 7838.25 236.523  13
  -1  -6   3 8125.85 207.862  11
  -1  -6   3 7978.40 234.765  13
  -1  -6   3 8424.09 217.320   9
   1  -6  -3 7947.32 230.115   9
   1  -6  -2-3.51281 44.7695   7
  -1  -6   2 14.9721 40.5818   7
   1   6  -2 59.0410 42.3623   6
  -1   6   2-7.24959 41.4190   4
  -1  -6   2 6.76813 40.3878   2
  -1   6   2 16.2311 38.5464  11
  -1  -6   2 12.0137 29.8196  11
   1   6  -2 2.20043 33.2737  12
   1  -6  -2 17.4630 39.0399  11
  -1   6   2 65.1567 41.1996  13
  -1  -6   2 24.4044 47.6833  13
  -1  -6   2 18.7757 38.1608   9
   1  -6  -2 13.6848 40.1993   9
   1   6  -1 6468.61 187.588   7
   1  -6  -1 6557.40 192.539   7
  -1  -6   1 6428.43 188.926   7
  -1   6   1 6640.27 195.582   6
   1   6  -1 6106.80 190.167   6
   1  -6  -1 6069.79 187.374   2
   1   6  -1 6483.49 195.834   4
  -1  -6   1 6596.09 192.502   2
  -1   6   1 6674.94 195.668   4
   1   6  -1 6422.29 178.298  12
  -1   6   1 6505.33 181.709  11
   1   6  -1 6583.60 174.562  11
  -1   6   1 6510.13 177.021  12
  -1  -6   1 6669.14 176.903  11
  -1  -6   1 6894.53 203.157  13
  -1   6   1 6545.13 202.870  13
   1  -6  -1 6863.83 185.446  11
  -1  -6   1 5997.08 153.538   8
  -1  -6   1 6318.36 183.888   9
  -1   6   0 6174.00 183.176   6
  -1  -6   0 5826.58 180.067   7
   1   6   0 6187.14 181.099   7
   1  -6   0 5949.88 181.503   7
   1   6   0 5991.77 185.332   4
  -1  -6   0 6074.60 182.539   2
  -1   6   0 5819.47 184.082   4
   1  -6   0 5839.17 178.659   2
  -1  -6   0 6089.13 190.773  13
  -1  -6   0 5924.73 167.846  11
  -1   6   0 5807.64 191.231  13
   1  -6   0 6008.97 188.641  13
   1   6   0 5954.76 171.368  12
   1  -6   0 6069.52 172.301  11
  -1   6   0 5996.37 163.710  12
  -1  -6   0 5900.80 176.720   9
  -1   6  -1 247.405 45.2745   5
   1   6   1 258.993 49.2487   7
  -1  -6  -1 307.213 48.1298   7
   1  -6   1 245.560 48.9480   7
  -1   6  -1 351.236 49.6543   6
   1   6   1 308.069 48.6430   4
   1  -6   1 279.465 46.5634   2
   1   6   1 260.609 42.7762  12
  -1   6  -1 280.685 53.9479  13
   1  -6   1 282.919 49.3087  13
  -1   6  -1 255.300 33.1592  12
  -1  -6  -1 279.871 54.2042  13
   1  -6   1 259.145 39.2165  11
  -1  -6  -1 287.499 39.0171  11
  -1  -6  -1 273.360 46.6109   9
  -1   6  -2 101.123 42.5960   6
   1  -6   2 70.9478 43.0520   7
  -1  -6  -2 92.4445 45.8655   7
   1   6   2 68.3982 48.7253   6
   1  -6   2-6.31837 42.2495   2
   1   6   2 32.9290 42.3259   4
  -1   6  -2 68.0891 28.1919  12
  -1  -6  -2 89.9239 37.0802  11
   1  -6   2 30.2329 42.0522  13
   1  -6   2 59.7897 32.8239  11
   1   6   2 73.2105 38.6312  11
  -1  -6  -2 76.5605 44.9784   9
  -1   6  -3 715.796 56.3682   6
   1  -6   3 724.907 60.7370   7
   1   6   3 863.210 71.1460   6
   1   6   3 745.169 60.2869   4
  -1   6  -3 722.336 61.0232   4
   1  -6   3 740.713 58.6015   2
  -1  -6  -3 859.254 63.7022   2
   1  -6   3 780.152 50.3771  11
  -1  -6  -3 721.139 56.9053  11
  -1   6  -3 706.977 40.2331  12
   1   6   3 733.873 55.1370  11
   1  -6   3 844.221 65.9081  13
  -1  -6  -3 826.623 64.2540   7
  -1  -6  -3 759.279 64.7463   9
  -1  -6  -4 337.228 53.5230   7
   1   6   4 273.635 53.5694   7
   1  -6   4 423.083 50.8487   7
  -1   6  -4 341.002 46.9521   6
   1   6   4 421.832 55.1520   4
  -1  -6  -4 315.322 48.5244   2
  -1   6  -4 499.812 54.8609   4
   1  -6   4 345.541 46.5053   2
   1   6   4 397.117 50.0285  11
   1  -6   4 364.067 40.1503  11
  -1  -6  -4 286.203 54.7239  13
  -1   6  -4 441.301 57.5273  13
   1  -6   4 369.665 52.8563  13
  -1  -6  -4 411.963 56.6899   9
  -1   6  -5 1306.96 66.2348   6
   1  -6   5 1100.73 68.0858   7
   1   6   5 985.314 75.0103   7
   1  -6   5 1333.06 68.9658   2
  -1  -6  -5 1093.89 68.6167   2
  -1   6  -5 1126.58 72.1723   4
   1   6   5 1079.38 72.1108   4
   1   6   5 1098.79 70.1322  11
   1  -6   5 1073.21 58.6060  11
  -1  -6  -5 1265.03 83.6472  13
   1  -6   5 1182.00 73.0548  13
  -1   6  -5 1269.40 80.4940  13
  -1  -6  -5 1062.83 76.8316   9
  -1  -6  -5 1174.21 77.1361   7
   1  -6   5 1114.35 58.3620   9
   1   6   6 15717.2 398.119   7
   1  -6   6 15212.3 380.199   7
  -1   6  -6 15931.5 370.275   6
  -1  -6  -6 15399.5 381.547   2
   1  -6   6 16042.3 379.666   2
  -1   6  -6 15594.0 386.366   4
   1   6   6 15457.5 387.290   4
   1  -6   6 15068.3 367.502  11
   1  -6   6 15420.7 358.303  12
  -1  -6  -6 15877.5 400.360  13
  -1   6  -6 15543.1 400.277  13
   1  -6   6 15828.3 385.591  13
   1   6   6 15649.7 387.897  11
  -1  -6  -6 15528.9 394.642   9
   1  -6   6 15691.8 364.259   9
  -1  -6  -6 15400.7 390.889   7
   1   6   7 161.957 57.9626   7
   1  -6   7 187.349 49.1352   7
   1  -6   7 213.524 46.3586   2
  -1  -6  -7 172.439 47.1105   2
   1   6   7 193.214 49.8885   4
  -1   6  -7 202.633 48.4242   4
   1  -6   7 277.235 34.6153  12
   1  -6   7 248.592 51.0727  13
  -1   6  -7 109.954 52.0555  13
  -1  -6  -7 170.951 56.5257  13
   1   6   7 237.057 54.9567  11
   1  -6   7 242.015 41.0711   9
  -1  -6  -7 158.378 58.8367   9
   1  -6   8 391.937 53.6059   7
   1   6   8 434.792 67.9470   7
   1  -6   8 412.062 52.0190   2
  -1  -6  -8 352.584 52.1378   2
  -1   6  -8 403.476 55.1569   4
   1   6   8 330.344 55.7782   4
   1   6   8 475.110 67.5892  11
  -1  -6  -8 500.071 66.7911  13
   1  -6   8 460.272 42.0406  12
   1  -6   8 553.697 56.8918  13
  -1   6  -8 489.358 65.6088  13
   1  -6   8 546.112 46.7959   9
  -1  -6  -8 382.369 48.7305  10
  -1  -6  -8 400.751 70.1626   9
  -1   6  -9 295.757 42.0262   5
   1  -6   9 177.720 47.6260   6
   1  -6   9 265.516 53.5317   7
   1   6   9 266.502 67.9480   7
  -1   6  -9 195.720 51.4332   4
  -1  -6  -9 201.179 50.3782   2
   1  -6   9 287.759 48.5788   2
   1   6   9 194.451 51.9769   4
   1  -6   9 212.819 40.7713  12
  -1   6  -9 237.236 61.0730  13
  -1  -6  -9 293.512 66.8363  13
   1  -6   9 201.080 43.1278   9
  -1  -6  -9 174.057 46.9329  10
  -1   6 -10 1432.92 66.7331   5
   1   6  10 1299.73 98.8407   7
   1  -6  10 1420.00 75.3847   6
  -1  -6 -10 1515.14 74.4139   2
   1   6  10 1525.60 83.2258   4
  -1   6 -10 1352.51 77.5191   4
   1  -6  10 1489.37 73.1353   2
   1   6  10 1547.00 99.3598   5
   1  -6  10 1314.67 65.9926  12
  -1   6 -10 1371.16 91.0598  13
  -1  -6 -10 1366.74 92.4072  13
  -1  -6 -10 1451.77 71.9704  10
   1  -6  10 1394.79 68.7058   9
   1  -6  11-44.3327 47.6833   6
   1   6  11 51.3431 67.6633   7
  -1   6 -11 44.8170 43.2984   5
  -1   6 -11 98.8647 48.6584   4
  -1  -6 -11 9.72945 43.2073   2
   1   6  11 21.8191 49.9492   4
   1   6  11 4.68380 69.9486   5
   1  -6  11 20.3387 44.0287   1
  -1  -6 -11 64.8789 58.3780  13
  -1   6 -11 23.4340 63.5188  13
   1  -6  11 36.3556 41.4671  12
   1  -6  11 8.61940 43.0577   9
  -1  -6 -11 56.2111 70.8317   9
  -1  -6 -11 79.8663 47.9937  10
  -1   6 -12 40.6004 42.5002   5
   1   6  12 63.1462 70.5861   7
   1  -6  12 84.3986 50.5627   6
   1  -6  12-42.5233 44.1854   1
   1   6  12-43.2788 76.4913   5
  -1  -6 -12 67.7054 41.1847   2
  -1   6 -12-2.91853 46.4291   4
  -1   6 -12 32.7454 63.2923  13
   1  -6  12 58.7693 46.0112  12
  -1  -6 -12 9.26635 62.5800  13
   1  -6  12 44.9324 46.4128   9
  -1  -6 -12 92.5071 53.0318  10
  -1  -6 -12 105.757 72.9885   9
   1   6  13 1019.66 98.0955   7
   1  -6  13 1014.77 68.2468   6
  -1   6 -13 994.161 63.4271   5
   1  -6  13 838.560 54.9905   1
  -1   6 -13 1061.62 66.4393   4
  -1  -6 -13 975.397 56.9345   2
   1  -6  13 947.774 66.9523  12
  -1  -6 -13 1257.94 93.0233  13
  -1   6 -13 993.573 85.3424  13
  -1  -6 -13 880.620 67.7747  10
   1  -6  13 881.716 65.2727   9
  -1  -6 -13 1208.74 96.9729   9
   1   6  14 299.754 83.9543   7
  -1   6 -14 266.997 52.5821   5
  -1  -6 -14 228.342 42.9668   1
  -1   6 -14 187.576 67.0310  13
  -1  -6 -14 360.033 76.5510  13
  -1  -6 -14 206.822 82.9542   9
  -1  -6 -14 323.296 60.3676  10
  -1   7  13 16.1568 77.4454   7
  -1  -7  13 41.3171 52.8859   7
  -1  -7  13 40.9462 64.1924   6
   1  -7 -13-4.29053 49.1185   1
  -1  -7  13 83.9920 50.9056   2
   1   7 -13 27.1817 36.5779   5
  -1   7  13 6.68260 55.2112   4
  -1  -7  13 121.079 58.1753  12
   1   7 -13 4.48706 62.8474  13
  -1  -7  13 61.0768 42.8037  11
   1  -7 -13 26.8747 63.4316  13
  -1   7  13-6.29855 44.0043   8
   1  -7 -13 36.1967 78.6175   9
   1  -7 -13 62.1308 60.6013  10
  -1  -7  12 396.107 70.3417   6
  -1   7  12 286.346 79.4469   7
  -1  -7  12 469.771 60.1933   7
   1   7 -12 441.782 41.0342   5
  -1  -7  12 455.923 58.9178   2
   1   7 -12 402.496 63.2402   4
  -1   7  12 326.739 61.0197   4
   1  -7 -12 312.374 55.5943   1
   1   7 -12 473.277 71.1455  13
  -1  -7  12 267.768 59.7108  12
   1  -7 -12 368.038 72.8848  13
  -1  -7  12 353.760 45.8609  11
   1  -7 -12 373.824 82.3172   9
  -1  -7  12 403.492 43.9590   9
   1  -7 -12 403.496 63.5830  10
  -1  -7  11 3334.57 131.048   6
  -1   7  11 3240.57 146.268   7
   1   7 -11 3206.39 99.0963   5
  -1  -7  11 3129.14 117.955   7
   1   7 -11 3129.23 129.073   4
  -1  -7  11 3352.98 122.593   2
   1  -7 -11 3489.37 118.512   2
  -1   7  11 3152.28 128.542   4
   1  -7 -11 3387.19 120.959  10
  -1  -7  11 3407.21 119.213  12
   1  -7 -11 3187.91 139.000  13
  -1  -7  11 2970.25 104.645  11
   1   7 -11 3440.92 141.833  13
   1  -7 -11 3579.67 151.096   9
  -1  -7  11 3517.28 101.853   9
  -1  -7  10 787.685 73.8887   6
   1  -7 -10 740.025 83.2170   7
  -1  -7  10 813.431 65.1247   7
  -1   7  10 890.900 89.7589   7
   1   7 -10 668.931 71.7686   4
  -1   7  10 715.452 69.8464   4
   1  -7 -10 763.373 64.4560   2
  -1  -7  10 732.525 66.0885   2
   1  -7 -10 776.566 66.2722  10
   1  -7 -10 740.965 77.3268  13
   1   7 -10 738.667 81.4262  13
  -1  -7  10 794.754 66.5557  13
  -1  -7  10 772.496 62.0081  12
  -1  -7  10 677.689 50.0000  11
  -1   7  10 684.846 42.4763   8
  -1  -7  10 831.570 50.5011   9
  -1  -7   9 224.149 61.4003   6
  -1  -7   9 177.301 51.6441   7
  -1   7   9 54.5935 62.5967   7
   1  -7  -9 170.570 68.4991   7
   1  -7  -9 129.513 50.2854   2
  -1  -7   9 84.1897 53.7242   2
   1   7  -9 189.807 59.4566   4
  -1   7   9 153.155 56.1362   4
  -1  -7   9 189.652 48.5648  12
   1   7  -9 57.2709 59.2478  13
   1  -7  -9 83.4368 60.9477  13
  -1  -7   9 108.711 36.9922  11
  -1  -7   9 195.774 53.0284  13
  -1  -7   9 200.943 38.9992   9
   1  -7  -9 106.727 51.6912  10
  -1   7   9 128.346 27.5974   8
   1  -7  -8 463.012 72.7792   7
  -1  -7   8 718.357 62.6545   7
  -1   7   8 636.312 78.7735   7
  -1  -7   8 624.750 69.9912   6
  -1   7   8 655.789 66.7579   4
   1  -7  -8 607.667 61.7289   2
  -1  -7   8 582.074 65.3521   2
   1   7  -8 551.463 69.0371   4
  -1  -7   8 608.941 46.7048  11
   1   7  -8 653.262 72.4884  13
  -1  -7   8 800.439 58.7046  12
   1  -7  -8 506.127 70.4522  13
  -1   7   8 581.822 69.5973  11
  -1  -7   8 684.345 68.8085  13
  -1  -7   8 703.042 47.5250   9
  -1   7   8 574.958 29.3212   8
   1  -7  -8 674.285 82.5873   9
  -1  -7   7 1031.99 70.1498   7
  -1   7   7 1309.06 87.2785   7
   1  -7  -7 1167.32 76.1376   2
  -1  -7   7 1081.63 77.2536   2
   1   7  -7 1071.79 82.2163   4
  -1   7   7 1081.40 76.2713   4
   1   7  -7 1022.87 82.9552  13
  -1  -7   7 981.745 55.4720  11
   1  -7  -7 1170.32 87.3631  13
  -1  -7   7 1110.95 78.3087  13
  -1  -7   7 1015.65 62.4243  12
  -1   7   7 1181.97 80.0483  11
   1  -7  -7 995.253 86.5151   9
  -1  -7   7 1136.68 56.8095   9
  -1   7   6 280.910 64.2034   7
  -1  -7   6 312.815 54.4877   7
   1   7  -6 279.139 52.1870   6
  -1  -7   6 223.782 54.6102   2
   1   7  -6 277.627 56.2091   4
   1  -7  -6 207.082 53.9547   2
  -1   7   6 233.892 56.9199   4
  -1  -7   6 184.235 36.5952  11
   1  -7  -6 227.329 62.2636  13
   1   7  -6 193.988 59.5215  13
  -1   7   6 288.115 58.2972  11
  -1  -7   6 254.005 44.5416  12
  -1  -7   6 280.891 58.9801  13
   1  -7  -6 287.472 56.9902  11
  -1  -7   6 270.275 42.5419   9
   1  -7  -6 240.386 63.1875   9
  -1  -7   5 1483.74 78.8564   7
   1   7  -5 1351.14 77.5000   6
  -1   7   5 1278.70 87.9733   7
   1  -7  -5 1293.16 87.5205   7
  -1   7   5 1546.24 85.1552   4
   1   7  -5 1384.68 85.1786   4
  -1  -7   5 1285.27 78.1377   2
   1  -7  -5 1185.90 77.2844   2
  -1  -7   5 1275.94 60.2219  11
  -1  -7   5 1470.61 87.3307  13
  -1   7   5 1271.12 79.2834  11
   1   7  -5 1420.24 88.2365  13
   1  -7  -5 1250.08 89.9423  13
   1  -7  -5 1265.13 80.6416  11
   1  -7  -5 1264.81 87.1425   9
   1   7  -4 3750.85 135.004   6
  -1   7   4 3669.16 143.899   7
   1  -7  -4 3867.07 145.070   7
  -1  -7   4 3927.33 134.593   7
   1  -7  -4 3736.10 135.993   2
  -1   7   4 3798.94 140.571   4
   1   7  -4 3884.83 144.585   4
  -1  -7   4 3910.51 141.252   2
  -1  -7   4 3786.35 116.923  11
   1   7  -4 3767.61 119.806  12
  -1   7   4 3906.62 135.463  11
   1  -7  -4 3706.01 147.829  13
   1  -7  -4 3687.77 134.837  11
  -1  -7   4 4041.81 146.192  13
   1   7  -4 3660.02 147.481  13
  -1  -7   4 3977.97 129.412   9
   1  -7  -4 3963.59 145.323   9
   1   7  -3 430.973 61.1677   6
  -1  -7   3 421.756 54.7355   7
   1  -7  -3 460.837 63.1927   7
   1   7  -3 368.558 50.7484   5
  -1  -7   3 361.169 58.7967   2
  -1   7   3 424.223 59.1862   4
   1  -7  -3 278.728 54.7198   2
   1   7  -3 368.198 44.6731  12
   1  -7  -3 432.137 54.8585  11
  -1   7   3 387.441 54.5163  11
  -1  -7   3 429.716 64.2333  13
   1  -7  -3 545.716 70.0334  13
  -1  -7   3 402.323 42.8784  11
   1  -7  -3 355.208 62.6698   9
  -1  -7   3 387.589 51.2739   9
  -1   7   2 29.2288 52.4024   6
   1   7  -2 93.3852 53.6448   6
   1  -7  -2 67.7104 53.4363   7
  -1  -7   2 48.6467 45.3092   7
  -1  -7   2 3.84712 48.9486   2
  -1   7   2 49.8078 47.8924   4
   1  -7  -2 52.0507 44.7722  11
  -1  -7   2 122.735 39.2819  11
  -1   7   2 89.3091 45.5790  11
  -1  -7   2 77.7014 52.4879  13
   1   7  -2 14.7195 38.5545  12
   1  -7  -2 15.7292 50.2243   9
  -1  -7   2 50.0114 22.1025   8
  -1  -7   2 31.3839 45.1438   9
   1   7  -1 582.661 59.3397   7
   1   7  -1 649.801 68.2972   6
  -1   7   1 627.174 66.2783   6
  -1  -7   1 653.456 64.2989   7
   1  -7  -1 648.325 65.7592   7
   1   7  -1 653.931 68.8252   4
  -1  -7   1 563.070 60.6999   2
  -1   7   1 705.197 64.6147   4
  -1   7   1 678.441 50.8292  12
  -1  -7   1 854.930 74.8237  13
   1   7  -1 622.681 52.4480  12
  -1   7   1 591.975 55.2606  11
  -1  -7   1 677.018 51.4214  11
   1  -7  -1 596.992 58.0006  11
  -1   7   1 620.750 69.6644  13
  -1  -7   1 478.390 23.0235   8
   1  -7  -1 672.330 65.6472   9
  -1  -7   1 597.420 59.9306   9
  -1   7   0 130.022 52.4018   6
   1   7   0 90.8839 50.3961   7
   1  -7   0 148.191 54.8516   7
  -1  -7   0 89.2538 51.1312   7
   1   7   0 74.9379 58.4474   6
  -1  -7   0 115.911 52.4109   2
  -1   7   0 163.243 52.8786   4
   1   7   0 80.9935 52.4626   4
   1  -7   0 127.337 47.6536   2
   1   7   0 85.9584 39.3238  11
  -1  -7   0 103.731 41.0978  11
   1   7   0 114.899 43.9139  12
  -1  -7   0 131.033 54.9090  13
   1  -7   0 111.910 42.4740  11
  -1   7   0 145.481 50.6732  13
  -1   7   0 137.693 39.6290  12
   1  -7   0 80.5321 48.7960  13
  -1  -7   0 157.161 48.7350   9
   1  -7   0 78.4259 15.3424   8
   1   7   1 4191.14 145.513   7
   1  -7   1 4293.85 145.787   7
  -1   7  -1 4104.75 138.340   5
  -1   7  -1 3894.27 140.258   6
  -1  -7  -1 4147.15 144.110   7
   1  -7   1 3699.56 138.678   2
   1   7   1 3984.07 146.883   4
  -1   7  -1 3793.34 119.028  12
   1   7   1 4089.99 134.776  12
   1   7   1 3955.48 129.049  11
   1  -7   1 4115.03 149.884  13
  -1   7  -1 3460.73 148.697  13
   1  -7   1 4118.01 130.981  11
  -1  -7  -1 4139.86 155.093  13
  -1  -7  -1 4133.48 132.443  11
  -1  -7  -1 3728.15 137.773   9
  -1   7  -2 1030.54 70.8402   6
   1  -7   2 768.117 68.9378   7
  -1   7  -2 940.243 65.7330   5
   1   7   2 837.378 73.4135   7
   1  -7   2 903.330 70.4343   2
   1   7   2 969.420 74.8476   4
   1  -7   2 995.641 62.0016  11
   1  -7   2 999.307 74.7511  13
  -1  -7  -2 961.134 64.1671  11
   1   7   2 879.750 61.2651  11
  -1   7  -2 938.578 50.7983  12
   1   7   2 936.530 68.9608  12
  -1  -7  -2 983.657 73.3153   9
  -1  -7  -2 894.151 72.6685   7
  -1   7  -3 715.555 58.2550   5
  -1   7  -3 771.432 66.1971   6
   1  -7   3 598.315 62.8299   7
   1   7   3 645.847 71.2161   6
  -1  -7  -3 577.487 67.9015   7
   1  -7   3 673.658 63.3770   2
   1   7   3 636.924 67.7167   4
  -1   7  -3 584.288 63.4696   4
  -1  -7  -3 745.808 66.7458   2
   1  -7   3 800.599 55.1923  11
  -1  -7  -3 624.572 58.2831  11
  -1   7  -3 679.543 42.2909  12
   1  -7   3 740.300 71.8396  13
   1   7   3 678.081 59.0139  11
  -1  -7  -3 577.208 67.6373   9
  -1   7  -4 2409.74 90.6851   5
   1   7   4 2064.27 108.710   6
   1  -7   4 2241.94 101.976   7
  -1   7  -4 2320.72 97.9776   6
  -1  -7  -4 2226.70 101.720   2
   1  -7   4 2199.03 98.4700   2
   1   7   4 2412.07 109.083   4
  -1   7  -4 2020.53 101.579   4
  -1   7  -4 2195.07 114.841  13
   1  -7   4 2202.37 105.342  13
   1   7   4 2290.62 98.5741  11
   1  -7   4 2164.71 88.8158  11
  -1  -7  -4 2351.53 114.910  13
  -1  -7  -4 2187.47 106.528   9
  -1  -7  -4 2198.24 107.313   7
   1   7   5 3992.96 159.506   7
  -1   7  -5 4552.60 143.999   6
   1  -7   5 4654.63 152.638   7
  -1   7  -5 4620.82 136.193   5
  -1  -7  -5 4215.53 151.344   2
   1  -7   5 4268.16 148.234   2
  -1   7  -5 4114.49 153.305   4
   1   7   5 4247.09 155.811   4
   1  -7   5 4472.40 157.313  13
   1   7   5 4431.63 151.135  11
  -1   7  -5 4363.63 166.644  13
   1  -7   5 4394.75 137.889  11
  -1  -7  -5 4509.32 166.891  13
  -1  -7  -5 4653.94 162.717   9
  -1  -7  -5 4357.61 158.976   7
   1  -7   5 4552.90 137.221   9
  -1   7  -6 1319.91 66.8296   5
   1  -7   6 1277.40 78.7294   7
  -1   7  -6 1364.55 72.8211   6
   1   7   6 1387.21 93.7048   7
   1   7   6 1357.29 86.6220   4
   1  -7   6 1167.48 75.2635   2
  -1   7  -6 1102.73 79.4218   4
  -1  -7  -6 1295.87 79.5422   2
  -1  -7  -6 1232.75 92.6017  13
  -1   7  -6 1355.92 93.5428  13
   1   7   6 1378.81 84.6508  11
   1  -7   6 1377.12 68.8734  11
   1  -7   6 1274.11 81.1525  13
   1  -7   6 1373.79 67.3239   9
  -1  -7  -6 1304.63 88.6402   7
  -1  -7  -6 1381.77 92.6932   9
   1   7   7 271.540 69.8636   7
  -1   7  -7 288.974 45.8113   5
   1  -7   7 271.254 55.8957   7
   1   7   7 218.468 59.8049   4
  -1  -7  -7 160.382 55.1909   2
   1  -7   7 398.474 58.6652   2
  -1   7  -7 324.646 62.7371   4
   1   7   7 308.283 61.2686  11
  -1  -7  -7 254.650 67.6089  13
   1  -7   7 332.750 58.4654  13
   1  -7   7 214.709 45.0625  11
  -1   7  -7 309.812 66.6024  13
   1  -7   7 259.818 37.6052  12
  -1  -7  -7 241.968 68.5578   9
   1  -7   7 334.147 46.7846   9
   1  -7   8 163.685 53.9420   7
   1   7   8 127.350 68.3829   7
  -1   7  -8 188.174 43.0537   5
  -1   7  -8 78.4534 55.0098   4
  -1  -7  -8 100.584 53.7958   2
   1   7   8 44.0763 54.4664   4
   1  -7   8 38.2672 50.1711   2
  -1   7  -8 124.411 66.7549  13
  -1  -7  -8 70.3063 64.5515  13
   1  -7   8 147.221 44.0621  11
   1  -7   8 192.539 55.1502  13
   1  -7   8 131.357 37.0106  12
   1   7   8 198.042 60.7463  11
   1   7   8 109.322 22.7894   8
  -1  -7  -8 107.997 66.5501   9
  -1  -7  -8 84.9626 48.2562  10
   1  -7   8 212.897 45.8596   9
  -1   7  -9 623.621 51.4250   5
   1   7   9 508.148 81.4690   7
   1  -7   9 526.391 64.6310   7
  -1  -7  -9 542.806 61.9071   2
  -1   7  -9 508.096 65.3998   4
   1   7   9 526.872 69.5225   4
   1  -7   9 518.920 59.7300   2
   1   7   9 445.753 69.2826  11
   1  -7   9 491.293 52.5089  11
  -1  -7  -9 515.114 76.0246  13
   1  -7   9 571.342 47.0230  12
  -1   7  -9 722.712 80.3474  13
  -1  -7  -9 588.187 58.9850  10
  -1  -7  -9 497.442 78.3762   9
   1  -7   9 427.922 49.7383   9
   1   7   9 488.366 34.4534   8
   1   7  10 639.188 86.4636   7
   1  -7  10 559.941 67.0709   7
  -1   7 -10 707.331 54.4424   5
   1   7  10 470.729 67.9932   4
  -1  -7 -10 544.100 60.2414   2
   1  -7  10 735.528 64.1149   2
  -1   7 -10 636.669 70.3733   4
  -1  -7 -10 698.547 83.2671  13
  -1   7 -10 561.422 77.6884  13
   1   7  10 534.886 76.0691  11
   1  -7  10 758.613 53.1906  12
  -1  -7 -10 632.422 61.3786  10
   1   7  10 536.723 41.2647   8
   1  -7  10 649.147 56.4271   9
   1   7  11-71.4498 74.3589   7
  -1   7 -11 26.5533 44.2747   5
   1  -7  11 33.9157 55.7183   7
   1  -7  11-2.76068 49.0372   2
  -1   7 -11 101.179 60.4534   4
   1   7  11 25.6278 57.7307   4
  -1  -7 -11 56.4290 52.6802   2
   1  -7  11 58.0135 43.6656  12
  -1   7 -11-57.0325 66.5852  13
  -1  -7 -11 40.4458 67.9324  13
   1  -7  11 33.0326 46.5124   9
  -1  -7 -11 42.8137 51.7270  10
   1  -7  12 361.460 64.2602   7
  -1   7 -12 451.216 53.6417   5
   1   7  12 392.176 86.8228   7
  -1  -7 -12 484.914 56.3497   2
  -1   7 -12 452.270 65.8706   4
   1  -7  12 342.644 55.7742   1
  -1   7 -12 416.283 78.6898  13
  -1  -7 -12 361.707 77.8617  13
  -1  -7 -12 331.717 82.9932   9
   1   7  12 353.415 46.1774   8
   1  -7  12 440.141 54.3708   9
  -1  -7 -12 542.972 60.1703  10
  -1   7 -13 311.681 52.2474   5
   1  -7  13 214.289 61.9041   7
   1   7  13 113.810 82.8218   7
   1  -7  13 178.323 51.7992   1
  -1   7 -13 186.717 57.3170   4
  -1  -7 -13 210.399 48.4842   2
  -1  -7 -13 204.028 72.7830  13
  -1   7 -13 136.922 69.9284  13
   1   7  13 187.343 46.8089   8
  -1  -7 -13 244.080 58.3875  10
  -1  -7 -13 288.801 87.4540   9
  -1   8  12 62.0279 85.1488   7
   1  -8 -12-52.7843 60.2793   1
  -1  -8  12 122.850 58.2699   2
   1   8 -12 101.825 65.4238   4
  -1   8  12 83.8176 63.8007   4
   1   8 -12 15.2717 70.9562  13
   1  -8 -12-24.7834 71.8131  13
   1  -8 -12-49.3286 59.9392  10
  -1   8  12 26.1884 33.0214   8
   1  -8 -12 54.3791 85.2052   9
  -1  -8  11 426.174 63.0906   7
  -1   8  11 332.991 84.2531   7
  -1   8  11 334.232 69.9713   4
   1  -8 -11 488.364 61.5296   2
  -1  -8  11 409.842 65.1951   2
   1   8 -11 247.926 68.9869   4
   1   8 -11 337.583 73.6993  13
   1  -8 -11 255.823 75.1808  13
  -1  -8  11 385.287 48.0492  11
  -1  -8  11 375.743 58.9083  12
  -1   8  11 266.366 31.1335   8
   1  -8 -11 278.965 62.7185  10
  -1  -8  10 739.199 71.4943   7
  -1   8  10 823.061 91.9458   7
  -1   8  10 860.107 81.9132   4
   1  -8 -10 704.980 68.4535   2
  -1  -8  10 817.590 75.2420   2
   1   8 -10 735.089 81.7830   4
  -1  -8  10 732.228 53.6571  11
   1  -8 -10 718.835 86.5681  13
  -1  -8  10 810.159 65.2639  12
  -1  -8  10 984.125 76.2230  13
   1   8 -10 801.453 85.4713  13
  -1  -8  10 745.348 53.1396   9
   1  -8 -10 728.515 71.1352  10
   1   8  -9 98.4641 40.1282   5
  -1   8   9 133.445 78.8183   7
   1  -8  -9-29.0416 67.5786   7
  -1  -8   9 23.4306 53.3786   7
  -1  -8   9-15.0531 56.3626   2
  -1   8   9 34.5985 59.9950   4
   1  -8  -9 72.8857 56.6248   2
   1   8  -9-9.08765 66.2255   4
  -1  -8   9 24.0054 49.8501  12
  -1  -8   9-2.04881 40.1670  11
  -1   8   9 54.5873 65.1198  11
   1   8  -9 85.3430 70.4221  13
  -1  -8   9 122.435 60.6959  13
   1  -8  -9 5.09856 66.4654  13
   1  -8  -9 36.5091 73.8604   9
   1  -8  -9-17.3635 56.7746  10
  -1  -8   9 61.2739 43.2358   9
  -1   8   8 31.3323 68.6983   7
   1   8  -8-5.59129 40.0279   5
  -1  -8   8 61.4963 54.0802   7
  -1  -8   8-27.1428 61.9859   2
   1   8  -8 83.0692 62.1213   4
   1  -8  -8 32.6159 55.4739   2
  -1   8   8-13.2285 60.9714   4
   1  -8  -8 20.5107 65.7304  13
  -1  -8   8 74.9079 40.3948  11
   1   8  -8 69.9914 64.8209  13
  -1  -8   8-5.23834 45.1262  12
  -1   8   8 121.878 64.0918  11
  -1  -8   8 107.572 62.4808  13
  -1  -8   8 92.2582 43.2180   9
   1  -8  -8-5.08914 72.0706   9
  -1   8   7-20.3254 67.5730   7
   1   8  -7 53.0117 42.1646   5
  -1  -8   7 83.7619 56.1398   7
   1   8  -7 139.679 57.1798   6
  -1  -8   7 55.6304 56.0188   2
   1  -8  -7 56.4101 56.3311   2
   1   8  -7 84.3367 67.0785   4
  -1   8   7 75.5912 64.7188   4
   1   8  -7-10.8393 63.1125  13
  -1  -8   7 74.4109 38.7048  11
   1  -8  -7 72.1190 64.3874  13
  -1   8   7 96.0303 64.2554  11
  -1  -8   7 73.8688 63.8017  13
  -1  -8   7 43.5742 44.8104   9
   1  -8  -7 29.8304 66.2326   9
  -1  -8   7-2.74822 48.0979   9
  -1  -8   6 4278.26 153.050   7
   1   8  -6 4399.13 153.032   6
   1   8  -6 4780.38 138.849   5
  -1   8   6 4417.66 171.166   7
   1  -8  -6 4751.07 160.749   2
  -1  -8   6 4690.05 161.291   2
   1   8  -6 4415.24 168.445   4
  -1   8   6 4614.15 166.562   4
  -1  -8   6 4472.55 166.141  13
  -1  -8   6 4349.26 135.107  11
   1  -8  -6 4512.31 172.348  13
   1   8  -6 4787.73 178.304  13
   1  -8  -6 4182.33 160.853  11
  -1   8   6 4660.36 162.321  11
   1  -8  -6 4828.71 174.464   9
  -1  -8   6 4675.98 139.392   9
  -1  -8   6 4485.40 146.447   9
   1  -8  -6 4557.51 170.279   7
  -1   8   5 3574.97 149.965   7
  -1  -8   5 3881.26 138.295   7
   1   8  -5 3802.19 122.754   5
   1   8  -5 3665.10 136.777   6
  -1   8   5 3302.89 140.586   4
  -1  -8   5 3773.50 144.022   2
   1  -8  -5 3550.94 137.881   2
   1   8  -5 3422.14 145.827   4
  -1   8   5 3831.59 139.620  11
  -1  -8   5 3472.58 146.904  13
   1  -8  -5 3713.58 141.641  11
   1  -8  -5 3601.33 152.286  13
   1   8  -5 3800.76 157.055  13
  -1  -8   5 3687.82 118.517  11
   1  -8  -5 3707.61 149.926   9
  -1  -8   5 3822.10 130.108   9
   1  -8  -5 3852.00 150.998   7
   1  -8  -4 319.356 67.2823   7
  -1  -8   4 372.650 62.1139   7
   1   8  -4 316.038 52.0170   5
   1   8  -4 268.818 58.7625   6
  -1  -8   4 270.871 62.4753   2
   1   8  -4 326.239 67.1781   4
  -1   8   4 287.383 64.8873   4
   1  -8  -4 255.269 61.3836   2
  -1   8   4 336.645 61.4972  11
  -1  -8   4 218.499 61.2208  13
   1  -8  -4 259.310 57.5869  11
   1  -8  -4 222.914 70.6656  13
  -1  -8   4 286.970 45.4626  11
   1   8  -4 267.838 45.4840  12
   1  -8  -4 318.355 70.8213   9
  -1  -8   4 250.903 54.5242   9
  -1   8   3 288.225 72.2111   6
  -1  -8   3 210.215 59.7581   7
   1   8  -3 246.005 55.1914   5
   1  -8  -3 322.185 66.6233   7
   1   8  -3 265.460 61.7646   6
   1  -8  -3 116.199 56.8220   2
  -1  -8   3 227.423 60.1521   2
  -1   8   3 356.952 64.2981   4
   1  -8  -3 326.219 60.7980  11
  -1  -8   3 302.290 67.7013  13
  -1  -8   3 311.276 46.3881  11
   1   8  -3 299.871 47.6117  12
   1  -8  -3 247.294 67.6313  13
  -1   8   3 256.600 55.3778  11
  -1  -8   3 303.071 31.7994   8
   1  -8  -3 364.451 68.1334   9
  -1  -8   3 261.345 56.9365   9
   1  -8  -2 4786.34 166.022   7
   1   8  -2 4769.55 163.257   6
  -1  -8   2 4737.26 159.504   7
  -1   8   2 4479.72 166.224   6
  -1  -8   2 4734.35 162.668   2
  -1   8   2 4447.76 163.659   4
   1   8  -2 4650.12 141.996  12
  -1   8   2 4562.41 145.259  12
  -1   8   2 4537.50 148.807  11
  -1  -8   2 4923.13 143.101  11
   1  -8  -2 4537.36 152.883  11
  -1  -8   2 4796.44 171.651  13
  -1  -8   2 4770.83 154.321   9
  -1  -8   2 4007.35 111.904   8
   1  -8  -2 4421.46 161.507   9
  -1   8   1 57.7241 61.7154   6
   1   8  -1 119.005 60.5837   6
   1  -8  -1 12.9688 55.7516   7
  -1  -8   1 93.2296 59.0992   7
  -1   8   1 88.1163 57.9823   4
   1   8  -1 72.1044 59.6143   4
  -1  -8   1 89.3502 55.1818   2
  -1   8   1 88.3752 48.8011  11
   1   8  -1-5.70943 46.2725  12
  -1   8   1 119.687 44.9253  12
  -1  -8   1 67.3965 42.7860  11
   1  -8  -1 116.880 50.6422  11
  -1  -8   1 127.932 59.6048  13
  -1  -8   1 99.1572 55.1770   9
   1  -8  -1 46.4811 56.9001   9
   1   8   0 2306.75 112.348   6
  -1   8   0 2020.09 103.635   5
  -1  -8   0 2341.36 109.632   7
   1   8   0 2396.02 108.630   7
  -1   8   0 2395.27 112.062   6
   1  -8   0 2328.92 111.566   7
  -1   8   0 2380.96 113.678   4
   1  -8   0 2222.92 106.320   2
   1   8   0 2294.34 115.140   4
  -1  -8   0 2261.18 107.992   2
  -1  -8   0 2189.45 93.3073  11
   1  -8   0 2265.21 98.9542  11
   1  -8   0 2176.97 113.043  13
   1   8   0 2276.64 91.8175  11
  -1   8   0 2452.02 118.600  13
  -1  -8   0 2301.15 117.463  13
  -1   8   0 2049.29 85.4732  12
   1   8   0 2044.98 92.2321  12
  -1  -8   0 2105.87 104.405   9
   1  -8   0 2082.47 106.069   9
  -1   8  -1 16.1222 59.3407   6
   1  -8   1-4.17343 55.4896   7
  -1  -8  -1-4.19032 57.0756   7
   1   8   1 67.5438 57.1116   7
   1   8   1 58.8384 67.4944   6
  -1   8  -1-50.1895 60.1725   5
   1  -8   1 84.2538 58.6420   2
   1   8   1 52.5745 58.2768   4
   1   8   1-20.4607 46.9487  11
   1   8   1-3.27845 46.9279  12
   1  -8   1-6.30135 47.7048  11
  -1  -8  -1 26.2136 62.2925  13
  -1   8  -1-20.0720 38.3357  12
  -1  -8  -1-12.6921 48.8223  11
   1  -8   1-14.4547 58.8725  13
  -1  -8  -1-24.0424 56.2983   9
  -1   8  -2 83.8840 54.1995   5
  -1   8  -2 135.091 58.4830   6
  -1  -8  -2 93.9854 58.3290   7
   1   8   2 106.587 60.0212   7
   1  -8   2 119.233 59.5176   7
   1  -8   2 87.8749 56.6927   2
   1   8   2 123.930 60.7858   4
   1  -8   2 57.2139 59.1450  13
   1   8   2 94.4475 49.8143  11
  -1  -8  -2 74.4826 49.8942  11
  -1   8  -2 90.3074 36.8905  12
   1   8   2 92.1840 53.2889  12
   1  -8   2 112.771 46.5764  11
  -1  -8  -2 125.276 60.4484   9
  -1  -8  -3 663.166 75.2871   7
  -1   8  -3 709.117 64.2606   5
   1   8   3 684.135 80.3616   7
  -1   8  -3 739.498 70.6811   6
   1  -8   3 536.746 70.0929   7
  -1  -8  -3 635.233 69.9168   2
   1   8   3 540.330 73.2827   4
  -1   8  -3 744.290 76.1289   4
   1  -8   3 565.155 65.6702   2
  -1   8  -3 713.814 47.4654  12
   1   8   3 708.233 65.4287  11
   1  -8   3 739.503 59.5518  11
   1  -8   3 772.166 77.9614  13
   1   8   3 624.661 69.4127  12
  -1  -8  -3 760.993 76.7238   9
   1   8   4-50.0471 69.6448   6
  -1  -8  -4 22.4207 61.0785   7
  -1   8  -4 52.7593 54.9703   6
  -1   8  -4 63.1675 49.3555   5
   1  -8   4 8.05654 57.3973   7
  -1  -8  -4-8.30645 57.5157   2
  -1   8  -4 31.3209 59.5973   4
   1   8   4-32.9130 63.1754   4
   1  -8   4-50.8681 55.1503   2
   1   8   4 14.2769 53.8216  11
  -1   8  -4 39.8478 59.5190  13
  -1  -8  -4 16.0358 62.2345  13
   1  -8   4 31.6496 45.0825  11
   1   8   4 52.4093 58.0584  12
   1  -8   4-13.8352 60.3353  13
  -1  -8  -4 13.4282 60.3497   9
  -1   8  -5-19.6737 54.5223   6
  -1  -8  -5 151.318 65.3664   7
   1  -8   5 95.6973 58.9096   7
  -1   8  -5 114.744 47.4853   5
   1   8   5 113.161 70.6776   6
   1  -8   5 61.6964 55.7350   2
  -1  -8  -5 89.7327 59.0383   2
  -1   8  -5 104.086 60.3109   4
   1   8   5 46.6138 61.7915   4
  -1   8  -5 5.71753 63.2975  13
  -1  -8  -5 70.1357 63.5653  13
   1  -8   5 124.175 60.5416  13
   1   8   5 136.226 57.0965  11
   1  -8   5 133.187 47.5548  11
   1  -8   5 113.278 50.9989   9
  -1  -8  -5 78.8935 65.0272   9
   1   8   6 1230.36 101.354   6
   1   8   6 956.105 90.9763   7
   1  -8   6 1045.76 83.5081   7
  -1   8  -6 1113.07 74.8066   6
  -1   8  -6 1081.97 66.7076   5
   1   8   6 894.334 83.9854   4
  -1  -8  -6 1040.97 83.4981   2
  -1   8  -6 990.870 84.9294   4
   1  -8   6 1269.20 81.3525   2
   1  -8   6 1088.56 69.9575  11
   1   8   6 1078.84 81.7928  11
   1  -8   6 1157.58 81.4868  13
  -1  -8  -6 1148.02 92.9695  13
  -1   8  -6 961.687 90.6434  13
   1  -8   6 1219.12 71.4697   9
  -1  -8  -6 1081.46 90.4337   7
  -1  -8  -6 1052.44 89.8792   9
   1  -8   7 1426.94 87.6506   7
   1   8   7 1237.59 106.576   6
  -1   8  -7 1454.53 78.3406   6
   1   8   7 1235.23 98.8811   7
  -1   8  -7 1431.98 71.6687   5
  -1   8  -7 1333.07 92.7025   4
   1  -8   7 1461.08 89.6381   2
   1   8   7 1391.67 94.1351   4
  -1  -8  -7 1196.21 85.6221   2
   1  -8   7 1301.43 71.8716  11
  -1   8  -7 1306.63 102.876  13
  -1  -8  -7 1326.50 101.769  13
   1  -8   7 1473.47 89.1645  13
   1   8   7 1518.74 94.1158  11
  -1  -8  -7 1321.01 96.0240   7
   1  -8   7 1301.39 71.1830   9
  -1  -8  -7 1314.94 103.433   9
  -1   8  -8 70.3354 47.9855   5
   1   8   8-16.4286 70.9884   7
   1  -8   8 65.5425 59.2456   7
  -1  -8  -8-78.1654 62.1295   2
   1  -8   8 96.7906 58.5490   2
   1   8   8 40.5489 64.1966   4
  -1   8  -8 44.3437 61.1088   4
   1  -8   8-46.9597 47.4842  11
  -1   8  -8 51.5992 70.4922  13
   1   8   8 87.8303 65.2133  11
  -1  -8  -8-10.8987 66.7243  13
   1  -8   8 43.7257 59.4458  13
  -1  -8  -8 20.1450 73.0726   9
  -1  -8  -8-60.4333 54.2132  10
   1  -8   8 51.5074 49.1689   9
   1   8   9 1618.60 117.068   7
  -1   8  -9 1908.69 79.1227   5
   1  -8   9 1723.02 98.1220   7
  -1  -8  -9 1736.73 93.9355   2
   1  -8   9 1922.29 95.0144   2
  -1   8  -9 1764.78 101.199   4
   1   8   9 1701.93 102.426   4
  -1   8  -9 1727.95 116.692  13
   1   8   9 1724.30 106.074  11
  -1  -8  -9 1626.20 84.7609  10
  -1  -8  -9 1760.47 114.258  13
   1  -8   9 1532.84 80.7526  11
   1  -8   9 1951.57 97.7797  13
   1  -8   9 1739.99 79.8826   9
  -1  -8  -9 1505.54 109.436   9
   1  -8  10 169.700 65.4362   7
  -1   8 -10 220.231 49.1153   5
   1   8  10 155.170 80.7996   7
   1  -8  10 284.648 60.9753   2
  -1   8 -10 173.790 67.2368   4
  -1  -8 -10 94.7699 56.8884   2
   1   8  10 198.067 70.5499   4
   1  -8  10 176.438 43.7922  12
  -1   8 -10 113.968 74.3381  13
   1  -8  10 91.2643 47.7819  11
  -1  -8 -10 206.852 74.2045  13
  -1  -8 -10 216.914 57.3711  10
   1  -8  10 172.913 50.6937   9
   1   8  10 70.4992 19.4705   8
  -1  -8 -10 189.565 81.7149   9
   1  -8  11 175.208 64.9597   7
  -1   8 -11 149.981 48.9094   5
   1   8  11 87.7372 82.1070   7
   1   8  11 116.611 68.7997   4
  -1  -8 -11 136.211 56.2912   2
   1  -8  11 190.997 59.0595   2
  -1   8 -11 201.185 67.0486   4
  -1   8 -11 118.718 74.1591  13
   1  -8  11 100.300 53.4403  11
   1   8  11 98.0313 29.9278   8
  -1  -8 -11 227.970 57.7068  10
   1   9 -10 177.817 43.7351   5
  -1  -9  10 70.8857 63.9581   7
  -1   9  10 208.074 83.4219   7
  -1   9  10 168.652 71.2936   4
   1  -9 -10 112.443 61.7686   2
  -1  -9  10 114.236 66.7779   2
   1   9 -10 117.277 73.6528   4
   1   9 -10 115.309 78.5947  13
   1  -9 -10 182.527 66.3209  10
   1  -9 -10 111.998 86.6756   9
   1   9  -9 117.797 45.0123   5
  -1   9   9 34.0687 77.1183   7
  -1  -9   9 65.7854 60.9832   7
   1  -9  -9 185.755 65.0709   2
  -1  -9   9 77.8416 66.7987   2
   1   9  -9 120.149 74.2744   4
  -1   9   9 187.027 71.6559   4
   1   9  -9 122.765 75.8198  13
  -1  -9   9 100.087 43.8606  11
  -1  -9   9 93.1334 47.3078   9
   1  -9  -9 132.821 80.2141   9
  -1  -9   9 93.1524 55.0062   9
  -1  -9   8 112.594 64.0458   7
  -1   9   8 27.6936 71.0030   7
   1   9  -8 84.5246 46.2458   5
  -1   9   8 34.1616 69.6532   4
   1  -9  -8 138.358 63.7364   2
   1   9  -8-45.9276 72.8326   4
  -1  -9   8-42.2405 66.2790   2
  -1  -9   8 40.8063 64.3155  13
  -1  -9   8 70.6739 42.8457  11
  -1  -9   8 88.2213 55.7945   9
  -1  -9   8 55.7970 48.2586   9
   1  -9  -8-27.0623 76.0534   9
   1   9  -7 93.8539 61.3909   6
  -1  -9   7 61.5544 60.2028   7
  -1   9   7 59.3975 75.5055   7
   1   9  -7-36.3703 46.7480   5
  -1   9   7 74.4979 70.9837   4
   1   9  -7-82.6833 70.1521   4
  -1  -9   7 8.62656 66.8046   2
   1  -9  -7 40.6869 64.3963   2
  -1  -9   7 9.51449 69.0245  13
  -1  -9   7 32.1130 42.8651  11
   1  -9  -7 5.60591 72.2635  13
  -1   9   7 56.8247 65.6419  11
  -1  -9   7 18.6659 53.9832   9
   1  -9  -7-53.0346 73.3250   9
  -1  -9   7 9.30129 47.6441   9
  -1  -9   6 421.805 69.2827   7
   1  -9  -6 297.956 75.2392   7
   1   9  -6 375.684 69.5102   6
   1   9  -6 370.857 52.8289   5
  -1   9   6 303.682 77.3201   7
   1  -9  -6 248.025 69.6000   2
  -1   9   6 350.848 78.4699   4
   1   9  -6 282.204 79.7838   4
  -1  -9   6 281.973 67.1966   2
  -1   9   6 310.375 67.9234  11
  -1  -9   6 255.146 72.1908  13
  -1  -9   6 282.948 49.4490  11
   1  -9  -6 393.641 81.7168  13
  -1  -9   6 364.018 62.8997   9
   1  -9  -6 347.317 78.8268   9
  -1  -9   6 301.003 55.3159   9
  -1  -9   5 1930.82 105.454   7
   1   9  -5 2214.11 108.477   6
   1   9  -5 2198.04 93.1959   5
  -1  -9   5 1927.07 110.200   2
  -1   9   5 1994.27 112.753   4
   1   9  -5 1998.52 115.675   4
   1  -9  -5 2037.87 105.776   2
  -1  -9   5 1877.95 113.888  13
   1  -9  -5 1853.83 105.321  11
   1  -9  -5 2130.50 121.029  13
  -1  -9   5 1951.10 83.9244  11
  -1   9   5 2023.89 104.564  11
   1  -9  -5 2237.30 117.426   7
  -1  -9   5 1862.87 74.5953   8
  -1  -9   5 2020.47 100.588   9
   1  -9  -5 1903.50 116.498   9
  -1   9   4 1355.76 104.401   6
   1  -9  -4 1440.51 97.8979   7
  -1  -9   4 1457.34 91.8058   7
   1   9  -4 1401.29 80.0548   5
   1   9  -4 1259.21 90.7548   6
   1   9  -4 1315.53 99.4128   4
  -1  -9   4 1307.48 94.5683   2
  -1   9   4 1222.98 94.4031   4
   1  -9  -4 1289.26 90.7436   2
  -1   9   4 1269.25 87.0655  11
  -1   9   4 1308.56 85.7756  12
   1   9  -4 1388.33 71.6914  12
   1  -9  -4 1346.21 97.1153  13
  -1  -9   4 1400.97 72.7563  11
   1  -9  -4 1290.80 90.0955  11
  -1  -9   4 1383.76 99.2954  13
   1  -9  -4 1337.80 99.6867   9
  -1  -9   4 1256.06 55.1776   8
  -1  -9   4 1340.00 85.3229   9
   1  -9  -3 160.927 69.4251   7
  -1   9   3 181.980 76.1516   6
   1   9  -3 93.7473 58.8723   5
  -1  -9   3 72.2894 62.4791   7
   1   9  -3 60.5450 68.4096   6
  -1  -9   3 13.6536 65.1977   2
   1   9  -3 117.067 70.7980   4
   1  -9  -3 105.436 65.1028   2
  -1   9   3 80.7408 65.7084   4
   1  -9  -3 115.493 59.6122  11
  -1   9   3 123.215 58.5471  11
  -1   9   3 121.663 60.1220  12
  -1  -9   3 158.246 48.8380  11
   1   9  -3 186.778 50.1405  12
   1  -9  -3 65.6246 64.7415  13
  -1  -9   3 42.0003 68.7341  13
  -1  -9   3 113.095 25.6647   8
  -1  -9   3 187.231 65.0954   9
   1  -9  -3 129.065 69.9165   9
  -1   9   2 295.946 77.8496   6
   1   9  -2 256.547 73.0958   6
  -1  -9   2 348.323 71.2312   7
   1   9  -2 211.349 64.7163   5
   1  -9  -2 310.024 74.4161   7
  -1   9   2 356.021 71.2911   4
  -1  -9   2 340.781 71.5175   2
   1  -9  -2 245.680 60.7893  11
  -1   9   2 216.783 56.6919  11
  -1   9   2 274.880 56.7927  12
   1   9  -2 285.088 53.6913  12
  -1  -9   2 399.189 74.7340  13
  -1  -9   2 227.891 52.0294  11
  -1  -9   2 323.342 67.2685   9
   1  -9  -2 290.950 74.2692   9
   1   9  -1 4027.01 157.492   6
  -1   9   1 4232.93 160.857   6
  -1  -9   1 3829.89 150.762   7
   1  -9  -1 4089.51 158.059   7
  -1   9   1 3640.28 151.345   4
   1   9  -1 3924.34 160.905   4
  -1  -9   1 3897.20 152.444   2
  -1  -9   1 3944.46 164.003  13
  -1  -9   1 3771.79 133.294  11
   1   9  -1 3825.71 132.811  12
  -1   9   1 3738.45 129.547  12
   1  -9  -1 3670.29 138.998  11
  -1  -9   1 3916.40 147.283   9
   1  -9  -1 3758.67 151.832   9
  -1   9   0 602.411 80.4478   6
   1   9   0 755.821 77.7070   7
   1  -9   0 633.387 80.7776   7
  -1  -9   0 630.486 78.2099   7
   1   9   0 777.391 86.4471   6
  -1   9   0 439.532 71.8274   5
  -1  -9   0 572.923 73.6530   2
   1   9   0 580.503 81.6620   4
   1  -9   0 635.069 73.7070   2
  -1   9   0 480.328 73.8517   4
   1   9   0 598.173 60.8045  11
   1  -9   0 693.565 68.2139  11
  -1  -9   0 746.761 86.3176  13
  -1  -9   0 610.661 62.6188  11
  -1   9   0 530.337 56.1313  12
   1   9   0 546.639 63.2516  12
   1  -9   0 540.149 77.5721  13
  -1  -9   0 574.363 73.2451   9
   1  -9   0 648.270 78.4372   9
  -1   9  -1 42.8084 63.0722   5
  -1  -9  -1 104.718 66.2899   7
   1  -9   1 100.659 63.3976   7
  -1   9  -1 140.654 68.5512   6
   1   9   1 64.1252 65.3986   7
   1   9   1 132.429 72.9682   6
   1   9   1 79.5136 67.9782   4
   1  -9   1 100.757 65.2715   2
   1   9   1-13.8419 54.4687  12
  -1  -9  -1 65.8404 53.9913  11
   1   9   1 149.892 54.0031  11
  -1  -9  -1 86.0441 69.5338  13
  -1   9  -1 111.968 45.2793  12
   1  -9   1 125.719 66.1474  13
   1  -9   1 121.007 52.7473  11
   1  -9   1 134.133 64.0145   9
  -1  -9  -1 105.291 67.8039   9
  -1   9  -2 321.814 71.4948   6
   1   9   2 310.465 72.0013   7
  -1  -9  -2 232.148 69.0371   7
   1  -9   2 320.484 68.2616   7
  -1   9  -2 295.027 63.7690   5
   1  -9   2 222.511 62.7672   2
  -1  -9  -2 202.430 66.7506   2
   1   9   2 343.246 76.5352   4
   1   9   2 295.327 65.4386  12
   1  -9   2 279.083 58.1111  11
   1   9   2 274.242 56.4860  11
   1  -9   2 253.453 75.4222  13
  -1   9  -2 265.872 46.2784  12
  -1  -9  -2 304.101 63.6225  11
   1  -9   2 399.102 68.8182   9
  -1  -9  -2 181.381 67.4382   9
  -1   9  -3 315.195 62.3002   5
   1  -9   3 209.216 66.8474   7
  -1  -9  -3 394.611 73.6842   7
   1   9   3 343.347 74.2271   7
  -1   9  -3 319.782 68.7549   6
  -1  -9  -3 345.050 73.1755   2
   1   9   3 267.176 69.3947   4
  -1   9  -3 299.238 72.4852   4
   1  -9   3 228.595 68.1164   2
   1  -9   3 428.946 78.9906  13
   1   9   3 353.105 68.0137  12
   1   9   3 381.759 65.1781  11
  -1   9  -3 324.328 44.2107  12
  -1   9  -3 225.223 75.6435  13
   1  -9   3 257.681 54.9356  11
  -1  -9  -3 351.237 74.2703   9
  -1  -9  -4 82.2583 64.7065   7
  -1   9  -4 99.3168 64.1468   6
  -1   9  -4 103.598 55.7388   5
   1   9   4 238.398 75.4436   7
   1  -9   4 39.5549 66.1206   7
  -1   9  -4 117.600 67.6510   4
   1  -9   4 81.3787 63.1816   2
  -1  -9  -4 53.8114 62.5349   2
   1   9   4 26.0035 67.3204   4
   1   9   4 3.76800 57.2422  11
  -1   9  -4 193.794 79.0794  13
   1   9   4 140.517 67.7578  12
   1  -9   4 97.3188 53.0217  11
   1  -9   4 69.8453 67.6393  13
  -1  -9  -4 34.6904 70.0803  13
  -1  -9  -4 135.345 74.8910   9
   1  -9   5 78.2108 64.0875   7
  -1   9  -5 122.197 55.1207   5
  -1   9  -5 57.7449 61.6012   6
   1   9   5 16.5458 78.3617   6
  -1  -9  -5 83.3974 67.5146   7
  -1   9  -5 76.3246 66.1050   4
   1  -9   5 113.400 65.6625   2
  -1  -9  -5 17.6476 63.4648   2
   1   9   5 56.6972 68.6746   4
  -1   9  -5 56.2255 72.5889  13
   1   9   5 31.7232 62.3137  11
   1   9   5 63.0012 68.6215  12
  -1  -9  -5 139.244 74.1027  13
   1  -9   5 111.205 66.8700  13
   1  -9   5 106.873 53.0136  11
   1  -9   5 106.958 55.4770   9
  -1  -9  -5 39.8706 71.5774   9
  -1   9  -6 267.421 61.9283   6
  -1   9  -6 269.493 59.6508   5
   1  -9   6 317.531 70.6502   7
  -1  -9  -6 151.258 67.2753   2
   1  -9   6 301.110 67.3049   2
  -1   9  -6 258.802 73.0932   4
   1   9   6 306.686 78.6581   4
  -1   9  -6 386.709 84.1530  13
   1  -9   6 384.330 71.5911  13
   1   9   6 170.576 65.6958  11
   1  -9   6 301.454 55.4314  11
  -1  -9  -6 5.12274 73.3371   9
   1  -9   6 281.842 57.9938   9
   1   9   7 79.2003 79.3792   7
  -1   9  -7 236.886 60.3823   6
  -1   9  -7 74.7987 52.7228   5
   1  -9   7 55.1009 65.7592   7
   1  -9   7 52.5736 59.5718   2
  -1   9  -7 79.8465 71.7846   4
  -1  -9  -7-4.19314 62.7351   2
   1   9   7 70.6017 73.3028   4
   1   9   7 100.258 67.1875  11
   1  -9   7 47.1041 52.5824  11
  -1   9  -7 112.251 76.3810  13
   1  -9   7 119.145 53.8758   9
  -1  -9  -7 88.8392 77.2947   9
   1   9   8 493.103 88.9090   7
   1  -9   8 476.794 77.0581   7
  -1   9  -8 587.344 60.8632   5
   1  -9   8 599.291 76.9339   2
  -1   9  -8 550.581 83.5266   4
   1   9   8 567.048 82.7358   4
  -1  -9  -8 687.191 78.2911   2
   1  -9   8 575.320 60.7678  11
  -1   9  -8 677.942 95.1898  13
   1  -9   8 553.679 62.1049   9
  -1  -9  -8 576.948 88.9121   9
   1   9   9 728.853 94.3599   7
  -1   9  -9 751.328 61.5156   5
   1  -9   9 761.351 82.0814   7
  -1   9  -9 770.200 89.5172   4
   1   9   9 541.155 84.9552   4
   1  -9   9 799.713 77.5735   2
  -1  -9  -9 672.034 79.0603   2
  -1   9  -9 743.528 98.7750  13
   1  -9   9 745.037 65.0270  11
  -1  -9  -9 766.221 70.6369  10
   1  -9   9 834.023 67.7235   9
  -1  -9  -9 784.324 100.434   9
   1   9  10 265.608 91.5542   7
  -1   9 -10 342.245 54.2889   5
   1  -9  10 267.010 72.9831   7
  -1   9 -10 337.976 77.2637   4
  -1  -9 -10 448.248 70.4495   2
   1   9  10 251.093 75.7850   4
   1  -9  10 344.313 69.5331   2
  -1   9 -10 258.228 83.2016  13
   1  -9  10 307.847 57.3564  11
  -1  -9 -10 330.723 63.8158  10
  -1  -9 -10 238.309 85.5724   9
  -1 -10   8 99.0380 73.4652   2
   1 -10  -8 273.352 73.3900   2
   1  10  -8 165.978 84.3255   4
  -1  10   8 175.758 82.8053   4
   1  10  -8 237.682 53.7842   5
  -1 -10   8 158.059 68.7488   7
   1 -10  -8 119.463 88.8868   9
  -1 -10   8 165.894 62.6715   9
   1  10  -7 159.511 56.8447   5
  -1 -10   7 200.382 73.0899   7
   1  10  -7 276.910 71.4183   6
  -1  10   7 265.945 82.6972   7
   1 -10  -7 104.661 71.0194   2
   1  10  -7 247.458 84.7992   4
  -1  10   7 249.026 84.2828   4
  -1 -10   7 87.6296 73.7564   2
  -1 -10   7 214.090 51.0926  11
   1 -10  -7 217.717 87.0174   9
  -1 -10   7 203.239 57.5017   9
  -1 -10   7 147.594 47.7536   8
  -1 -10   7 210.720 62.4842   9
   1  10  -6 413.468 78.0456   6
   1  10  -6 339.389 59.7744   5
  -1 -10   6 403.174 74.2293   7
   1 -10  -6 321.961 71.9218   2
   1  10  -6 232.805 79.5943   4
  -1 -10   6 272.691 80.7077   2
  -1  10   6 274.108 80.5662   4
  -1 -10   6 272.445 53.5337  11
  -1 -10   6 292.718 69.6637   9
   1 -10  -6 443.423 92.8733   9
  -1 -10   6 292.625 45.6886   8
  -1 -10   6 350.737 63.1602   9
   1  10  -5 491.338 79.9342   6
  -1 -10   5 369.506 75.1626   7
   1  10  -5 352.036 61.4811   5
   1  10  -5 360.627 85.8130   4
   1 -10  -5 346.779 75.5545   2
  -1  10   5 482.407 87.6510   4
  -1 -10   5 320.129 77.2457   2
   1 -10  -5 345.392 77.1100  11
  -1 -10   5 489.882 58.6105  11
  -1  10   5 334.150 74.9949  12
  -1  10   5 410.962 73.1543  11
  -1 -10   5 337.289 41.7562   8
  -1 -10   5 459.571 71.6908   9
   1 -10  -5 457.290 90.7254   9
   1  10  -4 48.1866 73.6906   6
  -1 -10   4 22.6079 67.7123   7
   1  10  -4 61.9909 61.2957   5
   1 -10  -4-51.0359 67.0173   2
  -1  10   4-11.2066 76.0648   4
  -1 -10   4-67.7227 74.0374   2
   1  10  -4-63.3886 75.5291   4
  -1 -10   4 11.3496 50.0962  11
  -1  10   4-54.5835 63.6764  12
   1  10  -4 115.523 49.8665  12
   1 -10  -4-4.42895 65.8617  11
  -1  10   4 47.7015 63.5394  11
  -1 -10   4 47.4558 29.8858   8
  -1 -10   4-50.5044 64.1151   9
   1 -10  -4-52.6323 77.1544   9
   1  10  -3 279.878 83.1313   6
   1  10  -3 203.219 63.7528   5
  -1 -10   3 261.852 76.0337   7
  -1  10   3 191.259 78.8276   4
  -1 -10   3 190.739 73.7957   2
   1 -10  -3 201.974 74.4801   2
   1  10  -3 214.637 83.2043   4
  -1 -10   3 161.074 54.5430  11
  -1  10   3 208.383 62.8692  11
  -1  10   3 126.638 61.4574  12
   1  10  -3 249.894 52.8274  12
   1 -10  -3 178.368 66.9310  11
   1 -10  -3 179.145 79.9342   9
  -1 -10   3 263.566 72.7769   9
   1  10  -2 1786.00 102.283   5
   1  10  -2 2166.92 119.252   6
  -1  10   2 2090.95 122.308   6
  -1 -10   2 1726.68 111.260   7
  -1  10   2 1764.07 119.249   4
  -1 -10   2 1752.54 108.026   2
  -1  10   2 1727.11 90.5200  12
  -1 -10   2 1733.75 88.5411  11
   1  10  -2 1749.38 88.3236  12
   1 -10  -2 1755.03 99.9317  11
   1 -10  -2 1853.32 114.117   9
  -1 -10   2 1817.28 104.067   9
  -1 -10   1 28.3392 69.8552   7
   1 -10  -1 117.853 71.6654   7
  -1  10   1-36.7430 76.1593   5
   1  10  -1 64.9338 73.5548   6
  -1  10   1 10.2269 77.8589   6
   1  10  -1 16.5427 72.0011   5
  -1  10   1 158.441 77.3490   4
   1  10  -1 156.947 80.9043   4
  -1 -10   1-14.7628 72.8820   2
  -1 -10   1 146.639 56.2684  11
   1  10  -1 31.4380 56.4082  12
  -1  10   1 57.2086 52.9148  12
   1 -10  -1 66.9577 60.6226  11
  -1 -10   1 110.066 70.4744   9
   1 -10  -1 131.834 73.0339   9
   1  10   0 242.019 78.7873   6
  -1 -10   0 206.289 73.8049   7
  -1  10   0 108.969 71.4428   5
   1 -10   0 186.777 77.7542   7
  -1  10   0 123.027 77.3827   6
   1  10   0 145.066 76.8242   4
  -1 -10   0 162.567 75.4821   2
   1 -10   0 141.238 70.2975   2
  -1  10   0 124.835 75.6626   4
   1 -10   0 125.818 62.3703  11
  -1 -10   0 200.719 59.4737  11
   1  10   0 199.879 63.6322  12
  -1  10   0 123.682 53.1078  12
   1 -10   0 263.066 76.7214   9
  -1 -10   0 45.6503 72.7869   9
   1  10   1 179.900 72.4071   7
   1 -10   1 14.8670 69.4074   7
  -1  10  -1-4.11222 68.4097   5
  -1  10  -1 94.9504 68.9867   6
  -1 -10  -1-24.3715 72.0750   7
   1 -10   1-23.4736 68.8223   2
   1  10   1 86.7254 75.7807   4
   1 -10   1 51.7564 60.2386  11
   1  10   1 42.5131 54.5878  11
  -1  10  -1-19.8675 48.2821  12
  -1 -10  -1 37.1488 57.3883  11
   1  10   1-3.61008 57.1394  12
  -1 -10  -1 47.0894 70.3228   9
   1 -10   1-42.0718 72.3080   9
   1  10   2 116.218 74.1116   7
  -1  10  -2 233.407 75.1340   6
  -1  10  -2 46.1525 65.8053   5
   1 -10   2 97.4778 72.6207   7
   1  10   2 97.9573 77.4600   4
   1 -10   2 144.915 68.2702   2
  -1 -10  -2 146.994 76.3207   2
   1  10   2 52.4043 54.3043  11
  -1  10  -2 100.074 45.5273  12
   1 -10   2 93.2256 57.1540  11
   1  10   2 185.212 67.0677  12
   1 -10   2 132.251 70.6726   9
  -1 -10  -2 38.8286 71.2937   9
  -1  10  -3 958.160 79.7179   5
   1  10   3 844.022 91.0353   7
   1 -10   3 1095.08 94.2996   7
  -1  10  -3 857.937 86.1138   6
  -1  10  -3 827.305 93.8857   4
  -1 -10  -3 863.307 89.2066   2
   1 -10   3 873.169 89.6853   2
   1  10   3 862.786 95.2799   4
   1  10   3 981.741 80.5894  11
  -1  10  -3 954.272 57.8848  12
   1  10   3 891.511 84.6622  12
   1 -10   3 832.191 73.4556  11
   1 -10   3 773.433 41.6505   8
   1 -10   3 886.592 88.7526   9
  -1 -10  -3 983.280 94.6025   9
  -1  10  -4 581.494 70.5405   5
  -1  10  -4 560.009 79.2564   6
   1  10   4 677.071 90.3676   7
   1 -10   4 558.413 83.5967   7
   1 -10   4 715.980 83.3007   2
  -1 -10  -4 545.256 83.6186   2
  -1  10  -4 462.953 88.3265   4
   1  10   4 567.057 87.9097   4
   1  10   4 590.056 80.8980  12
   1  10   4 603.907 76.0630  11
   1 -10   4 574.405 65.3609  11
  -1  10  -4 615.874 95.1072  13
   1 -10   4 591.663 80.4245   9
  -1 -10  -4 590.313 90.2333   9
   1 -10   5 32.6782 68.3603   7
  -1  10  -5 116.042 68.3877   6
   1  10   5 39.2271 78.1315   7
  -1  10  -5 199.190 60.4854   5
   1  10   5 50.6043 77.6342   4
   1 -10   5 54.2238 72.1637   2
  -1  10  -5 128.560 82.6717   4
  -1 -10  -5 93.9546 74.3757   2
   1  10   5 119.107 70.0254  11
   1 -10   5 162.004 57.0648  11
   1  10   5-13.9833 74.1630  12
  -1  10  -5 20.2731 82.0728  13
   1 -10   5 37.0190 62.5256   9
   1 -10   5 85.6425 70.0536   9
  -1 -10  -5 78.9527 78.5157   9
  -1  10  -6 776.958 73.1572   5
   1 -10   6 835.441 87.5097   7
  -1  10  -6 889.059 81.5826   6
   1 -10   6 811.890 88.1996   2
  -1  10  -6 1016.47 100.659   4
   1  10   6 939.177 98.2414   4
  -1 -10  -6 560.333 83.2357   2
   1 -10   6 763.237 69.9187  11
   1  10   6 847.621 92.7377  12
  -1  10  -6 916.112 102.332  13
  -1 -10  -6 825.862 99.3558   9
   1 -10   6 943.416 75.1097   9
  -1  10  -7 268.301 59.2700   5
  -1  10  -7 264.780 66.0856   6
   1 -10   7 180.540 73.8050   7
  -1  10  -7 376.831 88.5741   4
   1 -10   7 280.147 71.0745   2
   1  10   7 225.162 82.2471   4
  -1 -10  -7 353.846 79.1662   2
   1 -10   7 279.398 59.5192  11
   1  10   7 261.003 81.1360  12
  -1  10  -7 275.148 88.9721  13
   1 -10   7 302.439 62.7018   9
  -1 -10  -7 264.124 91.1275   9
   1  11  -3 25.8309 65.7466   5
  -1  11   3-6.06750 79.8225   4
   1 -11  -3 39.5117 71.8826   2
   1  11  -3 224.591 91.7259   4
  -1 -11   3-15.4417 79.4167   2
  -1 -11   3 25.2743 53.4517  11
  -1  11   3 47.2983 65.1423  12
   1  11  -3 77.1868 55.0463  12
   1 -11  -3 62.5106 69.7920  11
  -1 -11   3 52.0922 78.0216   9
   1 -11  -3 146.162 84.3951   9
  -1  11   2 65.1680 80.8513   5
   1  11  -2 168.156 71.9279   5
  -1 -11   2 139.550 77.7659   2
  -1  11   2 231.705 84.3420   4
  -1  11   2 110.590 62.3398  12
   1 -11  -2 120.470 71.0525  11
   1  11  -2 17.8614 55.3897  12
  -1 -11   2 100.365 55.8391  11
   1 -11  -2 206.384 83.0609   9
  -1 -11   2 117.463 79.2442   9
  -1  11   1-38.4267 79.1810   5
   1  11  -1-108.235 79.2215   5
  -1  11   1 49.0577 85.3355   4
   1  11  -1-37.4937 85.8307   4
  -1 -11   1-88.1143 81.4196   2
  -1  11   1-33.9839 57.4747  12
  -1 -11   1 17.7056 59.1081  11
   1  11  -1 35.2840 59.5654  12
   1 -11  -1-74.2930 67.1730  11
  -1 -11   1 60.6937 78.0167   9
   1 -11  -1-30.9202 80.0237   9
   1  11   0-13.7454 76.8241   5
  -1  11   0 68.1582 79.8255   5
  -1 -11   0-36.2900 81.1303   2
   1 -11   0 84.3302 78.9067   2
   1  11   0-18.7273 84.4572   4
  -1  11   0 104.479 89.5708   4
   1 -11   0 43.9017 63.1725  11
  -1  11   0 106.207 55.8033  12
   1  11   0 6.89685 61.6170  12
  -1 -11   0 9.65466 74.2817   9
   1 -11   0 40.2625 79.0608   9
  -1  11  -1 8.46029 71.0118   5
   1 -11   1 84.1351 77.1579   2
   1  11   1 99.4558 84.6753   4
  -1  11  -1 27.7224 50.8754  12
   1  11   1 33.3660 65.1364  12
   1 -11   1 112.183 66.5049  11
   1 -11   1 4.91235 77.7567   9
  -1 -11  -1 94.6016 81.1356   9
  -1  11  -2 629.818 82.0882   5
   1  11   2 811.963 104.000   4
  -1 -11  -2 742.380 95.2417   2
   1 -11   2 838.179 95.1397   2
   1  11   2 789.721 78.0006  11
  -1  11  -2 785.994 60.2349  12
   1 -11   2 864.283 78.7868  11
   1  11   2 791.842 82.5810  12
   1 -11   2 812.076 95.8627   9
  -1 -11  -2 644.790 96.8701   9
  -2   0  17-8.82253 51.7185   7
  -2   0  17 31.3878 50.7458   5
  -2   0  17 124.561 64.2434  11
   2   0 -17 19.8298 50.5636   9
  -2   0  16 720.068 59.8009   5
  -2   0  16 694.779 62.8749   7
  -2   0  16 905.595 76.3389  10
  -2   0  16 758.578 73.0502  11
   2   0 -16 552.216 24.0715  13
   2   0 -16 729.623 60.2599   9
  -2   0  15 11.4013 45.1286   5
  -2   0  15 5.46296 45.7463   7
  -2   0  15-31.9693 53.5639  11
   2   0 -15 8.25114 22.1459  13
   2   0 -15 40.5088 47.4967   9
  -2   0  15 83.9710 54.0605   9
  -2   0  15-3.09643 59.3446  10
  -2   0  14 111.907 43.8659   5
  -2   0  14 77.5217 47.2641   7
   2   0 -14 39.2887 22.3799  13
  -2   0  14 26.8798 49.3492  11
   2   0 -14 96.6224 45.1537   9
  -2   0  14 165.470 58.9621  10
  -2   0  14 78.0970 48.6222   9
  -2   0  13 21.7090 40.1267   7
  -2   0  13 10.4744 38.6183   5
   2   0 -13-2.88597 21.8664  13
  -2   0  13-31.5270 48.3178  11
   2   0 -13 61.9288 39.5552   9
  -2   0  13 41.6841 49.5042  10
  -2   0  13 15.9012 44.6802   9
  -2   0  12 89.1355 36.4927   5
  -2   0  12 93.8308 37.8732   7
  -2   0  12 96.7683 46.0398  11
   2   0 -12 39.7216 20.2628  13
  -2   0  12 93.3237 41.8059   9
   2   0 -12 130.233 37.1304   9
  -2   0  12 164.827 48.9240  10
  -2   0  11 60.5900 32.7568   5
  -2   0  11-6.14491 31.8520   7
  -2   0  11 8.15193 38.1208  11
   2   0 -11 29.1360 17.6307  13
   2   0 -11 19.7129 32.3125   9
  -2   0  11-22.5448 35.6856   9
  -2   0  11 80.3525 43.7187  10
  -2   0  10 4933.12 140.453   5
  -2   0  10 5131.71 150.427  11
   2   0 -10 5045.09 125.888  13
   2   0 -10 5177.44 142.266   9
  -2   0  10 5090.88 142.049   7
  -2   0  10 5198.76 145.279   9
  -2   0   9 11.5215 24.3073   7
  -2   0   9 6.49746 26.5337   5
  -2   0   9 17.7972 31.4569  11
   2   0  -9 30.1514 12.7762  13
  -2   0   9 18.2580 28.7203   9
   2   0  -9 20.0042 26.9418   9
   2   0  -9 20.4379 33.1868  10
  -2   0   8 1711.31 60.7573   5
  -2   0   8 1667.12 45.1970   1
   2   0  -8 1664.42 46.1135  13
  -2   0   8 1668.94 66.2078  11
   2   0  -8 1778.89 66.6399  10
  -2   0   8 1728.69 62.4122   9
   2   0  -8 1741.21 60.9310   9
  -2   0   8 1781.55 60.0230   7
  -2   0   7 1.20340 16.4466   7
  -2   0   7-9.03974 20.3368   5
  -2   0   7 4.18689 10.5228   1
  -2   0   7 1.69480 22.4544  11
   2   0  -7 4.78039 7.93323  13
   2   0  -7 3.93284 18.6791   9
   2   0  -7 17.9291 24.6115  10
  -2   0   7 6.91007 21.3208   9
  -2   0   6 25854.5 600.915   7
  -2   0   6 25612.2 594.251   1
  -2   0   6 25489.4 594.480   3
   2   0  -6 26096.7 594.198   1
  -2   0   6 26478.6 607.662  11
   2   0  -6 25965.2 607.258  10
   2   0  -6 26880.8 603.274   9
  -2   0   6 26780.2 603.742   9
  -2   0   5 8.41130 13.2088   7
  -2   0   5 12.5439 11.4381   3
   2   0  -5 34.2362 11.3666   1
  -2   0   5 26.2483 11.6137   1
  -2   0   5 25.7529 18.8313  11
   2   0  -5 19.4169 14.4772   9
   2   0  -5 30.1712 16.6656  10
  -2   0   4 47103.8 1072.22   7
   2   0  -4 46760.5 1072.85   1
  -2   0   4 46362.1 1073.08   1
  -2   0   4 46939.3 1073.44   3
  -2   0   4 46532.9 1077.58  11
   2   0  -4 47942.9 1078.53  10
   2   0  -4 47351.0 1074.84   9
   2   0  -4 48293.8 1072.20   7
  -2   0   3 393.526 20.5098   3
  -2   0   3 451.525 22.2417   1
   2   0  -3 399.214 20.8380  10
  -2   0   2 115.159 10.3388   5
  -2   0   2 118.628 13.7484   1
  -2   0   2 117.181 10.8584  11
   2   0  -2 123.577 13.3156   8
  -2   0   2 112.572 11.8273  10
  -2   0   1 45.9193 12.0022   1
  -2   0   1 45.6828 8.93781   5
   2   0  -1 29.5368 10.1779   8
  -2   0   1 53.9193 8.50152   9
   2   0   0 568.061 21.2142   5
  -2   0   0 549.636 22.0827   1
   2   0   0 571.055 20.9411  12
  -2   0   0 560.974 21.3239   9
   2   0   1-1.96606 10.4881   1
   2   0   1-0.79329 11.1808   5
   2   0   1-2.17973 6.49076   6
  -2   0  -1-1.66940 11.3502   9
   2   0   2 2507.76 61.7093   1
   2   0   2 2437.68 67.4231   5
  -2   0  -2 2455.13 68.5588   9
  -2   0  -3 218.060 16.8222   1
  -2   0  -3 242.482 17.2054   3
   2   0   3 184.898 16.6482   1
   2   0   3 131.321 23.4734   5
   2   0   3 149.552 24.5620   9
   2   0   4 23482.5 551.350   5
  -2   0  -4 24133.4 538.878   1
  -2   0  -4 24222.3 539.158   3
   2   0   4 22698.6 538.639   1
   2   0   4 23264.2 542.951  10
   2   0   4 22855.0 553.377   9
   2   0   5 22.9137 11.1922   1
  -2   0  -5 52.7168 12.5098   3
  -2   0  -5 44.6820 12.4324   1
   2   0   5 66.2792 25.5661   5
   2   0   5 10.9529 25.5789   9
   2   0   5 7.32419 19.4986  10
   2   0   6 10748.3 269.844   5
  -2   0  -6 10546.6 273.677   5
  -2   0  -6 10743.3 249.666   1
   2   0   6 10767.9 261.481  10
  -2   0  -6 11008.1 271.390   9
   2   0   6 10804.9 272.744   9
  -2   0  -7-9.71413 31.5977   5
   2   0   7-5.90562 27.0381   5
   2   0   7 9.21416 32.2617   9
   2   0   7 10.0810 25.3243  10
  -2   0  -7 19.4041 29.1684   9
   2   0   8 876.942 51.4921   5
   2   0   8 820.893 55.2259   9
  -2   0  -8 874.457 53.1121   9
   2   0   9 47.6664 35.1131   5
  -2   0  -9-2.50832 36.8802   9
   2   0   9 24.7679 39.8139   9
   2   0  10 7189.24 199.505   5
   2   0  10 7354.50 194.315  10
   2   0  10 7045.79 206.575   9
  -2   0 -10 7326.70 202.951   9
   2   0  11 55.7881 43.9243   5
   2   0  11 116.850 42.4964  10
  -2   0 -11 14.0758 47.2646   9
   2   0  11-6.35180 47.3071   9
   2   0  12 1039.67 66.0887   5
   2   0  12 1101.24 64.3387  10
   2   0  12 1040.06 75.0203   9
  -2   0 -12 844.216 68.3981   9
   2   0  13 83.0007 53.2569   5
  -2   0 -13 21.1690 51.3825   9
   2   0  13-10.7292 53.5650   7
   2   0  13 61.5887 48.8800  10
   2   0  13 46.2003 57.0204   9
   2   0  14 111.988 59.3618   7
   2   0  14 249.926 56.4152   5
   2   0  14 75.6536 51.8622  10
  -2   0 -14 112.222 55.1565   9
   2   0  14 44.4125 59.0010   9
   2   0  15 52.8026 55.9181   5
   2   0  15 54.2468 61.6608   7
  -2   0 -15 82.9248 59.5770   9
   2   0  15 69.0275 66.3627   9
   2   0  15 161.589 58.1150  10
   2   0  16 237.172 68.5916   7
   2   0  16 348.500 63.5067   5
  -2   0 -16 295.885 50.8646  13
  -2   0 -16 200.893 64.3958   9
   2   0  16 360.361 74.6066   9
   2   0  16 269.525 65.4076  10
  -2   1  17 1242.81 81.2906   7
  -2  -1  17 1252.19 69.4720   5
  -2  -1  17 1193.64 71.9315   7
  -2   1  17 1149.14 75.6946   5
  -2   1  17 1198.19 91.9288  11
  -2  -1  17 1193.70 84.5842  11
   2  -1 -17 1163.86 77.9192   9
   2   1 -17 1132.84 66.5476   9
  -2  -1  16 32.3377 46.0261   7
  -2   1  16 50.6382 54.6073   5
  -2  -1  16 21.0734 45.3411   5
  -2   1  16 118.777 56.7922   7
  -2   1  16 59.7013 63.6974  11
   2  -1 -16 49.8851 25.6019  13
  -2  -1  16 55.8218 54.7361  11
   2  -1 -16-17.8795 23.7883  13
   2   1 -16 7.44137 15.8675  13
  -2   1  16-50.8223 66.1942  10
   2  -1 -16 68.7869 52.2018   9
   2   1 -16 6.36863 44.4890   9
  -2  -1  16 46.9958 50.9260   9
  -2  -1  16 79.1449 61.7490  10
  -2   1  15 1252.40 72.6532   5
  -2   1  15 1209.81 75.8187   7
  -2  -1  15 1224.08 64.6711   5
  -2   1  15 1246.47 83.2822  10
   2  -1 -15 1082.19 43.0108  13
  -2  -1  15 1321.55 79.0833  11
  -2  -1  15 1218.51 77.9319  10
  -2   1  15 1290.19 84.9587  11
   2   1 -15 1083.06 43.7486  13
   2  -1 -15 1086.92 46.6012  13
   2  -1 -15 1289.08 75.1580   9
  -2  -1  15 1295.49 66.8840   7
  -2  -1  15 1303.04 71.5778   9
   2   1 -15 1288.51 65.3439   9
  -2   1  14 1232.01 69.4267   5
  -2  -1  14 1231.19 62.0579   5
  -2   1  14 1227.86 72.9264   7
  -2   1  14 1334.91 81.1721  11
  -2   1  14 1170.78 78.2386  10
  -2  -1  14 1329.95 78.1902  10
   2  -1 -14 1159.62 49.2617  13
   2   1 -14 1026.60 45.8838  13
  -2  -1  14 1220.50 75.4030  11
   2   1 -14 1188.32 61.6698   9
  -2  -1  14 1264.60 65.2614   7
  -2  -1  14 1235.46 67.3472   9
   2  -1 -14 1332.56 73.9455   9
  -2   1  14 1396.67 79.4701   9
  -2  -1  13 445.995 44.1173   5
  -2   1  13 502.725 52.6969   7
  -2   1  13 421.753 52.0578   5
   2   1 -13 388.345 30.5346  13
  -2   1  13 348.400 58.4564  11
   2  -1 -13 462.856 33.4580  13
  -2  -1  13 452.602 54.0153  11
  -2   1  13 422.514 59.5161  10
  -2  -1  13 511.939 49.3588   9
   2   1 -13 461.340 43.5596   9
  -2  -1  13 489.146 46.3205   7
  -2   1  13 536.349 58.3194   9
   2  -1 -13 417.774 52.8126   9
  -2  -1  13 437.283 57.2374  10
  -2  -1  12 386.893 41.5401   7
  -2   1  12 381.869 47.8736   7
  -2  -1  12 429.736 41.5046   5
  -2   1  12 327.052 46.8320   5
  -2   1  12 479.806 55.5152  11
   2   1 -12 341.595 28.1920  13
  -2  -1  12 348.195 49.6768  11
  -2  -1  12 448.433 44.9818   9
  -2  -1  12 402.355 55.0254  10
  -2   1  12 471.266 51.6090   9
   2  -1 -12 394.006 51.5567  10
   2   1 -12 343.654 40.5176   9
   2  -1 -12 414.411 49.9494   9
  -2   1  12 481.500 58.4122  10
  -2   1  11 2766.87 98.5591   5
  -2  -1  11 2805.02 88.2903   5
  -2   1  11 2681.16 98.4571   7
  -2   1  11 2743.26 105.539  11
   2  -1 -11 2890.74 101.265  10
   2   1 -11 2626.99 79.4440  13
  -2   1  11 2801.15 103.791  10
  -2  -1  11 2931.75 101.326  11
  -2  -1  11 2922.24 93.0045   9
  -2   1  11 3113.91 104.443   9
   2   1 -11 2960.68 90.6193   9
   2  -1 -11 2978.50 101.679   9
  -2  -1  11 2812.28 90.0902   7
  -2  -1  10 130.674 28.0330   5
  -2  -1  10 132.119 26.7854   7
  -2   1  10 102.758 33.4632   7
   2  -1 -10 105.087 11.7462   1
  -2  -1  10 100.046 11.5920   2
  -2  -1  10 71.7780 11.0617   1
  -2   1  10 126.919 37.8638   5
  -2   1  10 148.137 40.4603  11
   2   1 -10 124.726 20.3595  13
  -2  -1  10 154.914 35.3489  11
  -2   1  10 184.615 41.4133  10
  -2   1  10 148.541 39.5628   9
   2  -1 -10 129.403 36.2858   9
   2   1 -10 143.736 28.2809   9
   2  -1 -10 82.2506 36.3295  10
  -2  -1  10 162.357 30.4380   9
  -2  -1   9 173.638 24.3575   7
  -2   1   9 196.696 32.3372   7
  -2  -1   9 186.216 25.9259   5
  -2  -1   9 200.606 15.8544   1
  -2   1   9 181.723 36.6308   5
   2  -1  -9 172.799 16.1113   1
  -2   1   9 172.804 15.6319   2
  -2  -1   9 171.847 15.8134   3
  -2  -1   9 210.754 17.7083   4
  -2   1   9 182.700 37.2389  11
   2   1  -9 192.205 19.3586  13
   2   1  -9 180.991 26.5769   9
  -2   1   9 171.753 36.3252   9
  -2  -1   9 190.639 27.3508   9
   2  -1  -9 142.367 34.5607   9
   2  -1  -9 201.858 36.1465  10
  -2  -1   8 7931.33 196.187   5
  -2   1   8 8323.02 208.991   7
   2  -1  -8 7957.50 190.197   1
  -2  -1   8 7955.02 190.100   1
  -2  -1   8 7714.07 192.293   4
  -2   1   8 7869.98 191.301   2
   2  -1  -8 8348.74 207.540  10
  -2   1   8 7977.10 213.210  11
   2   1  -8 7703.96 192.815  13
   2  -1  -8 7800.64 195.451  13
  -2  -1   8 8250.20 198.912   9
   2  -1  -8 8302.30 210.697   9
   2   1  -8 8270.27 197.222   9
  -2  -1   8 8419.30 197.255   7
  -2   1   8 8538.49 211.586   9
  -2   1   7 1182.86 49.8538   7
  -2  -1   7 1167.06 40.2038   5
  -2  -1   7 1209.26 40.9846   4
   2  -1  -7 1193.08 38.4784   3
  -2   1   7 1182.42 38.4792   2
  -2  -1   7 1183.72 37.8334   1
   2  -1  -7 1167.28 37.3705   1
   2   1  -7 1164.20 38.2926  13
   2  -1  -7 1242.58 50.8461  10
  -2   1   7 1283.38 55.1898  11
   2  -1  -7 1128.30 39.9653  13
   2   1  -7 1301.57 41.3725   9
   2  -1  -7 1247.98 52.6807   9
  -2  -1   7 1197.78 41.8446   9
  -2  -1   6 2039.02 56.4896   5
  -2   1   6 2036.46 67.1618   7
  -2  -1   6 2127.47 61.9837   4
  -2  -1   6 2138.88 57.1728   1
   2  -1  -6 2146.96 57.3173   1
  -2   1   6 2044.85 58.4649   2
   2  -1  -6 2070.15 57.3844   3
   2   1  -6 2025.02 56.6282  13
  -2   1   6 2218.25 72.3537  11
   2  -1  -6 1930.67 58.4460  13
   2  -1  -6 2197.13 68.2625  10
   2  -1  -6 2130.23 67.3000   7
   2   1  -6 2130.96 56.8746   9
  -2  -1   6 2053.63 57.3879   9
   2  -1  -6 2001.13 69.2207   9
  -2  -1   5 2353.52 60.6328   5
  -2   1   5 2445.14 72.5573   7
  -2  -1   5 2444.46 70.1109   4
   2  -1  -5 2469.28 64.6418   1
  -2   1   5 2401.21 66.0569   2
  -2  -1   5 2440.80 64.5166   1
   2  -1  -5 2440.16 64.8495   3
   2  -1  -5 2314.44 71.3955  10
  -2  -1   5 2467.19 67.4543  11
   2  -1  -5 2271.44 64.9233  13
  -2  -1   5 2434.59 61.9853  13
   2   1  -5 2417.30 63.6085  13
  -2   1   5 2550.19 76.4832  11
   2   1  -5 2404.52 60.8298   9
  -2  -1   5 2452.04 61.5359   9
   2  -1  -5 2482.75 74.8855   9
   2  -1  -5 2448.17 72.1715   7
   2  -1  -4 47102.1 1102.18   7
  -2   1   4 48308.5 1102.82   7
   2  -1  -4 47858.1 1096.33   1
   2  -1  -4 48545.2 1096.63   3
  -2   1   4 47072.8 1097.30   1
  -2  -1   4 49201.0 1102.53   4
  -2  -1   4 48290.8 1096.47   1
  -2  -1   4 49093.7 1095.11  11
   2  -1  -4 49127.3 1097.61  13
   2  -1  -4 47171.8 1102.20  10
  -2  -1   4 47527.3 1095.64  13
  -2   1   4 48288.4 1105.42  11
  -2   1   3 1748.75 52.6727   7
  -2  -1   3 1765.01 49.3889   1
  -2   1   3 1670.86 49.4919   1
  -2  -1   3 1789.13 49.6812  13
  -2   1   3 1738.10 50.2171  13
  -2   1   3 1759.36 54.7654  11
   2  -1  -3 1646.59 48.8904  13
  -2  -1   3 1716.39 51.4323  10
   2  -1  -3 1773.85 52.6943  10
  -2  -1   2 10393.5 249.515   1
  -2   1   2 10390.9 250.053   1
  -2   1   2 10916.5 253.712  11
   2   1  -2 11249.7 253.687  12
  -2  -1   2 10746.0 248.626  10
  -2   1   2 10661.0 251.824  13
  -2  -1   2 10294.9 252.076   8
   2  -1  -2 10570.3 250.703   8
   2   1  -1 51.0260 13.9149   6
   2  -1  -1 63.9366 14.5036   5
  -2  -1   1 88.4616 13.2321   1
  -2  -1   1 62.8419 10.6968   5
  -2   1   1 70.1782 12.7837   1
   2   1  -1 62.8881 13.0194  12
   2  -1  -1 50.9209 12.2230  11
  -2   1   1 59.1669 11.8220  13
   2  -1  -1 61.9608 11.4966   8
  -2  -1   1 50.7008 11.1329   8
  -2  -1   1 56.9829 9.87433   9
  -2  -1   0 1173.34 37.9501   5
   2   1   0 1244.22 39.8466   6
   2  -1   0 1160.65 38.6368   5
  -2  -1   0 1089.73 36.1906   1
  -2   1   0 1217.88 37.5319   1
   2   1   0 1189.97 39.8644  12
  -2   1   0 1294.14 39.7715  13
  -2  -1   0 1165.57 37.9822   9
   2  -1   1 6462.92 153.934   3
   2  -1   1 6382.26 153.767   1
   2   1   1 6261.71 158.501   5
   2   1   1 6370.90 157.551   6
   2  -1   1 6402.44 156.908   5
  -2   1  -1 6281.35 156.759   9
  -2  -1  -1 6600.66 159.294   9
   2   1   2 12533.6 298.267   6
   2   1   2 12612.3 301.033   5
   2  -1   2 12559.8 297.431   5
   2  -1   2 12196.7 292.200   1
   2  -1   2 12370.5 292.530   3
  -2  -1  -2 12838.3 287.471  10
   2  -1   2 12275.2 297.211   9
  -2  -1  -2 12618.2 301.696   9
   2   1   3 86.5585 21.2053   5
   2  -1   3 130.487 18.8382   5
  -2  -1  -3 127.596 14.5347   1
   2  -1   3 111.134 13.3311   1
  -2  -1  -3 107.222 17.7272   4
   2  -1   3 124.809 14.4352   3
  -2   1  -3 122.795 15.3681   1
  -2  -1  -3 128.911 12.0365  10
   2  -1   3 112.431 20.0022   9
   2   1   3 125.922 12.5979  10
  -2  -1  -3 95.5134 21.0850   9
   2  -1   4 22197.6 511.362   5
   2   1   4 22121.5 516.798   5
   2  -1   4 21696.2 501.118   3
   2  -1   4 21741.5 500.899   1
  -2   1  -4 22285.3 504.406   2
  -2  -1  -4 22049.5 507.650   4
  -2  -1  -4 21669.2 501.206   1
   2   1   4 21599.0 503.277  10
  -2  -1  -4 21857.1 502.559  10
   2   1   4 21309.3 518.011   9
   2  -1   4 21336.4 511.843   9
   2   1   5 904.261 46.4481   5
  -2   1  -5 899.935 43.1932   5
   2  -1   5 885.820 42.4410   5
  -2  -1  -5 840.924 33.9610   4
   2  -1   5 857.537 29.7587   1
  -2   1  -5 812.976 31.9545   2
   2  -1   5 890.356 30.4891   3
  -2  -1  -5 845.998 30.1353   1
   2   1   5 921.529 36.3577  10
   2  -1   5 885.783 43.8253   9
  -2   1  -5 964.981 44.0624   9
   2   1   5 896.239 48.6345   9
   2  -1   6 2088.86 72.4440   5
   2   1   6 2142.48 78.3347   5
  -2   1  -6 2078.04 74.1467   5
  -2   1  -6 2062.90 59.7636   2
  -2  -1  -6 2039.80 60.8224   4
   2  -1   6 2176.85 57.3311   1
  -2  -1  -6 2093.17 56.9879   1
   2   1   6 2132.74 67.1210  10
   2   1   6 2097.60 80.8250   9
   2  -1   6 2080.34 74.1764   9
  -2   1  -6 2218.74 74.8703   9
  -2  -1  -7 194.345 17.1638   1
  -2   1  -7 148.605 17.0626   2
  -2   1  -7 195.203 34.0215   5
  -2  -1  -7 185.151 17.2163   4
   2  -1   7 154.724 16.4278   1
   2  -1   7 176.456 31.9636   5
   2   1   7 235.831 36.8123   5
  -2   1  -7 182.828 33.2583   9
   2   1   7 266.900 39.6993   9
   2   1   7 183.692 28.2033  10
   2  -1   7 149.308 29.2423  10
   2  -1   7 119.203 32.0395   9
  -2  -1  -7 214.404 37.5986   9
   2   1   8 3434.51 110.955   5
   2  -1   8 3356.41 105.822   5
  -2  -1  -8 3322.32 81.7937   1
   2  -1   8 3115.30 81.6601   1
  -2  -1  -8 3382.62 84.8106   4
  -2  -1  -8 3341.47 82.0120   3
   2   1   8 3382.08 101.416  10
   2   1   8 3711.89 118.079   9
   2  -1   8 3539.20 110.543   9
  -2  -1  -8 3496.92 113.452   9
  -2   1  -8 3557.06 108.847   9
   2   1   9 1921.32 82.3175   5
   2  -1   9 1988.00 78.0869   5
   2  -1   9 2019.98 74.9318  10
  -2   1  -9 1946.47 78.8949   9
  -2  -1  -9 2040.40 85.7857   9
   2  -1   9 1966.33 81.9110   9
   2   1   9 1992.69 88.4843   9
  -2   1 -10 337.113 50.8524   5
   2   1  10 230.446 46.5538   5
   2  -1  10 235.356 43.8873   5
   2   1  10 315.126 52.2410   7
  -2  -1 -10 247.378 51.1425   9
   2   1  10 244.364 41.7519  10
  -2   1 -10 255.728 45.3331   9
   2  -1  10 278.017 43.5187  10
   2  -1  10 297.906 47.5656   9
   2   1  10 273.867 53.2808   9
   2   1  11 978.571 67.1326   5
   2  -1  11 988.362 61.8253   5
  -2   1 -11 1002.42 68.1814   5
   2  -1  11 1101.81 63.6172  10
   2   1  11 1013.01 62.1809  10
   2   1  11 1006.61 72.5517   7
   2   1  11 1075.27 75.0340   9
  -2   1 -11 1033.68 65.4511   9
   2  -1  11 1081.01 69.2935   9
  -2  -1 -11 1076.66 69.6709   9
   2   1  12 208.150 56.8405   7
   2   1  12 248.415 52.6651   5
   2  -1  12 210.924 49.6217   5
  -2   1 -12 282.622 43.5934  13
   2  -1  12 215.905 52.8248   9
  -2  -1 -12 356.273 58.8942   9
   2   1  12 258.066 59.8392   9
   2  -1  12 173.240 48.7349  10
  -2   1 -12 253.817 52.5663   9
   2   1  12 324.549 53.5224  10
   2  -1  13 664.221 62.8537   5
   2   1  13 534.377 70.0232   7
   2   1  13 572.905 63.9252   5
  -2   1 -13 733.947 57.7152  13
   2  -1  13 676.108 62.8301  10
   2   1  13 664.170 62.4083  10
  -2  -1 -13 670.005 69.7225   9
  -2   1 -13 694.988 64.2660   9
   2   1  13 616.182 72.3124   9
   2  -1  13 746.500 69.6426   9
   2   1  14 767.166 76.8952   7
   2  -1  14 902.701 66.6606   5
   2   1  14 870.987 70.5887   5
   2  -1  14 832.276 66.8962  10
  -2   1 -14 880.335 63.7657  13
   2   1  14 787.206 69.6723  10
  -2   1 -14 983.064 70.6551   9
   2   1  14 822.961 78.3574   9
  -2  -1 -14 963.679 76.3838   9
   2  -1  14 810.911 75.4418   9
   2   1  15 204.291 61.3350   5
   2  -1  15 258.843 57.6014   5
   2   1  15 171.719 66.6953   7
  -2   1 -15 227.700 51.6789  13
  -2  -1 -15 66.1150 62.8853   9
   2  -1  15 318.449 62.4545  10
   2   1  15 193.276 60.8296  10
  -2   1 -15 257.205 60.7734   9
   2  -1  15 157.414 61.7545   7
   2   1  15 180.621 70.1905   9
   2  -1  15 183.693 64.5802   9
   2  -1  16 56.5021 64.0650   7
   2  -1  16 159.628 62.3030   5
   2   1  16 88.4120 63.5329   5
   2   1  16-85.9678 66.4906   7
  -2   1 -16-17.9595 47.9092  13
  -2  -1 -16 3.51020 62.9642   9
   2   1  16-5.90343 62.9504  10
   2   1  16 54.6033 72.9623   9
   2  -1  16-59.2995 67.6315   9
  -2   1 -16 125.247 60.4132   9
   2  -1  16 82.8259 62.1940  10
  -2   2  17 73.0497 62.3837   7
  -2   2  17 150.160 62.2432   5
  -2  -2  17 112.060 59.9625  11
   2  -2 -17 74.0214 30.6736  13
   2  -2 -17 161.632 27.0363  13
   2   2 -17 125.201 44.3892   9
   2  -2 -17 234.580 65.2648   9
  -2   2  16 42.8616 59.3304   7
  -2  -2  16 104.809 44.0285   7
  -2   2  16 145.133 57.8032   5
  -2  -2  16 91.9013 42.0446   5
  -2   2  16 55.1838 63.3465  11
   2   2 -16 127.202 28.3611  13
  -2  -2  16 137.106 57.4521  11
   2  -2 -16 52.8729 32.8971  13
  -2  -2  16 93.1895 47.8597   9
   2   2 -16 180.706 43.9921   9
   2  -2 -16 114.253 62.2182   9
  -2   2  15 129.998 57.0218   5
  -2  -2  15 28.1927 37.3425   5
  -2  -2  15 60.6726 41.5929   7
  -2   2  15 86.9511 57.0194   7
   2   2 -15 27.5526 27.9174  13
   2  -2 -15 66.0931 33.0669  13
  -2   2  15 53.0521 60.0987  11
  -2  -2  15 90.0913 54.3687  11
  -2  -2  15 44.8220 42.4650   9
  -2  -2  15 142.786 60.4268  10
   2  -2 -15 62.7766 58.6416   9
   2   2 -15 83.2218 39.4587   9
  -2  -2  14 96.1412 37.6278   7
  -2  -2  14 140.219 37.4052   5
  -2   2  14 140.865 57.3423   7
  -2   2  14 205.580 55.3611   5
   2  -2 -14 17.5804 31.2075  13
   2   2 -14 89.4174 29.0322  13
  -2   2  14 159.357 62.4066  11
  -2  -2  14 205.108 50.9085  11
   2  -2 -14 141.301 57.2645  10
   2  -2 -14 58.4337 55.9788   9
   2   2 -14 174.777 37.9019   9
  -2  -2  14 229.891 57.6027  10
  -2  -2  14 68.3167 40.0384   9
  -2  -2  13 323.112 39.0751   7
  -2  -2  13 371.301 37.8683   5
  -2   2  13 385.441 55.6070   7
  -2   2  13 320.461 55.9998   5
  -2   2  13 410.229 62.6585  11
   2   2 -13 309.815 34.7971  13
  -2  -2  13 319.048 50.2673  11
   2  -2 -13 382.019 38.3029  13
  -2  -2  13 435.415 60.0479  10
   2  -2 -13 373.678 57.5818   9
   2  -2 -13 448.488 59.3826  10
   2   2 -13 415.625 39.5836   9
  -2  -2  13 407.287 42.8467   9
  -2   2  12 4251.95 125.061   7
  -2   2  12 4345.49 125.259   5
  -2  -2  12 3559.87 94.4188   5
   2  -2 -12 3976.33 101.465  13
   2  -2 -12 4266.48 118.862  10
  -2   2  12 4277.66 130.964  11
   2   2 -12 4225.11 98.9311  13
  -2  -2  12 4258.99 103.254   9
   2   2 -12 4161.76 98.5251   9
   2  -2 -12 4315.31 124.020   9
  -2  -2  12 3952.20 100.501   7
  -2   2  11 5.78204 39.5106   7
  -2  -2  11 39.3286 25.3272   5
   2  -2 -11-13.6399 18.2443   1
  -2  -2  11 1.53819 17.9813   2
  -2   2  11-4.05342 17.6875   4
  -2   2  11-17.0475 46.4034   5
  -2  -2  11 4.63185 17.7706   1
  -2   2  11-6.53336 42.3458  11
   2   2 -11-9.35078 25.0930  13
   2  -2 -11 30.1689 27.9118  13
  -2  -2  11 9.06450 27.7215   9
   2   2 -11 31.7776 27.8063   9
   2  -2 -11 42.5502 42.4405  10
   2  -2 -11 34.9313 42.9190   9
  -2  -2  10 1455.46 53.2828   5
  -2   2  10 1613.86 73.8221   7
   2  -2 -10 1512.04 48.2977   3
   2  -2 -10 1571.73 48.2300   1
  -2  -2  10 1690.22 52.8713   2
  -2  -2  10 1568.02 48.0723   1
  -2   2  10 1518.41 51.6056   4
   2  -2 -10 1661.43 71.0823  10
   2  -2 -10 1562.74 60.8229  13
  -2   2  10 1527.99 78.5093  11
   2   2 -10 1525.21 57.6764  13
  -2  -2  10 1632.88 57.9250   9
   2   2 -10 1748.91 55.8867   9
   2  -2 -10 1550.43 75.6790   9
  -2   2   9 605.217 47.2131   7
  -2  -2   9 546.380 29.2525   5
   2  -2  -9 588.650 29.0952   3
  -2  -2   9 642.044 29.2451   1
  -2   2   9 564.551 30.9628   4
   2  -2  -9 623.492 29.1147   1
  -2  -2   9 538.019 31.7129   4
   2  -2  -9 635.605 38.0315  13
   2  -2  -9 648.047 46.8238  10
  -2  -2   9 568.451 48.0851  10
   2   2  -9 557.552 34.5997  13
  -2   2   9 678.002 52.3619  11
  -2  -2   9 564.318 31.8054   9
   2  -2  -9 611.425 50.7474   9
   2   2  -9 623.311 30.9215   9
  -2  -2   8 14548.0 351.238   5
  -2   2   8 15030.1 374.279   7
  -2  -2   8 15202.1 353.346   1
   2  -2  -8 15039.4 353.327   1
  -2  -2   8 15117.1 359.971   4
  -2   2   8 15259.3 358.295   2
   2  -2  -8 15005.5 353.629   3
   2   2  -8 14899.9 361.312  13
   2  -2  -8 15084.7 364.215  13
  -2   2   8 15562.2 379.475  11
   2  -2  -8 15376.8 368.316  10
  -2  -2   8 15522.8 354.140   9
   2   2  -8 14976.6 351.642   9
   2  -2  -8 15447.0 372.624   7
   2  -2  -8 15405.7 377.189   9
  -2   2   7 10709.7 275.264   7
  -2  -2   7 10682.8 253.117   5
   2  -2  -7 11025.5 258.898   1
  -2   2   7 10776.3 263.030   2
  -2  -2   7 10920.8 265.272   4
   2  -2  -7 10609.2 267.470  13
  -2   2   7 11237.7 279.944  11
   2  -2  -7 11485.5 270.947  10
   2   2  -7 10715.7 265.148  13
   2  -2  -7 10487.9 277.105   9
  -2  -2   7 10851.0 254.887   9
   2  -2  -7 11106.2 275.126   7
   2   2  -7 10943.2 253.126   9
  -2   2   6 3389.79 102.706   7
  -2  -2   6 3229.62 80.3297   5
  -2  -2   6 3212.32 93.8772   4
   2  -2  -6 3307.41 89.1346   1
  -2   2   6 3184.56 92.4920   2
   2  -2  -6 3466.11 98.6419  10
   2   2  -6 3262.94 93.6701  13
  -2  -2   6 3365.78 90.9083  13
  -2   2   6 3493.73 105.130  11
   2  -2  -6 3289.60 95.7231  13
  -2  -2   6 3365.89 81.3674   9
   2  -2  -6 3384.53 102.625   7
   2  -2  -6 3173.77 102.806   9
  -2  -2   5 1645.60 60.8677   6
  -2   2   5 1559.24 59.2346   7
   2  -2  -5 1601.57 60.9664   7
  -2  -2   5 1532.18 44.0562   7
   2  -2  -5 1518.39 49.9992   1
  -2   2   5 1481.99 52.6698   2
  -2  -2   5 1565.50 55.5993   4
   2   2  -5 1558.06 53.0568  13
  -2  -2   5 1522.96 52.1819  13
   2  -2  -5 1577.13 55.9251  10
  -2   2   5 1557.02 60.6736  11
   2  -2  -5 1508.74 54.8140  13
  -2   2   5 1631.53 54.4260   8
  -2  -2   4 2007.77 55.3869   7
  -2  -2   4 2059.29 68.7768   6
  -2   2   4 1964.15 68.4797   7
   2   2  -4 2032.06 67.6024   4
  -2  -2   4 1978.81 66.8139   4
   2  -2  -4 2106.58 61.9866   1
  -2   2   4 1959.26 63.2612   2
  -2  -2   4 2145.07 65.8520  12
  -2  -2   4 2066.77 65.4855  13
  -2   2   4 2120.77 69.8670  11
   2  -2  -4 2035.72 66.5742  13
   2   2  -4 2087.94 64.8577  13
  -2   2   4 2100.10 67.2335  13
  -2   2   4 2124.52 61.9797   8
   2   2  -3 102.575 13.2041   7
  -2  -2   3 131.714 21.5097   6
  -2  -2   3 125.148 13.4505   7
  -2   2   3 104.686 20.3427   7
  -2   2   3 112.063 19.4949   2
  -2  -2   3 114.054 20.4899   4
   2  -2  -3 103.511 19.8690  13
  -2   2   3 101.770 19.0061  13
   2  -2  -3 106.553 20.9939  11
  -2  -2   3 126.497 19.9765  12
  -2  -2   3 97.2187 19.7739  13
   2  -2  -3 126.398 15.4263   8
  -2  -2   3 120.965 10.4822   9
  -2   2   3 111.980 15.8112   8
  -2   2   2 999.725 40.6242   7
   2   2  -2 974.658 40.8241   6
   2   2  -2 980.581 34.4036   7
  -2   2   2 971.370 38.9187   2
  -2  -2   2 940.368 42.1623   4
   2  -2  -2 970.743 39.6687  11
  -2   2   2 1051.02 41.7992  13
  -2  -2   2 1017.18 39.7212  12
  -2  -2   2 911.509 40.9794  13
  -2   2   2 945.242 32.5764   8
   2  -2  -2 1001.17 33.3236   8
  -2  -2   2 1011.60 31.7304   9
  -2  -2   2 900.599 34.6756   8
  -2  -2   2 994.587 34.4026   7
   2  -2  -1 175.592 24.5215   7
   2   2  -1 219.432 25.0783   6
  -2   2   1 189.008 23.5084   2
   2   2  -1 172.491 28.3942   4
  -2  -2   1 225.193 24.5321  12
   2   2  -1 225.738 15.1694  11
   2  -2  -1 115.038 22.2152  11
  -2   2   1 186.840 24.3356  13
  -2  -2   1 134.753 14.4305   8
  -2  -2   1 203.824 19.9447   9
  -2  -2   1 211.438 23.0947   7
   2  -2  -1 124.727 16.2782   8
   2  -2   0 138255. 3128.30   5
   2   2   0 136614. 3129.58   6
   2   2   0 135206. 3131.94   4
  -2   2   0 138418. 3127.74   2
   2  -2   0 138916. 3126.47  11
   2   2   0 135338. 3128.91  12
  -2   2   0 139370. 3132.53  13
  -2  -2   0 137124. 3125.41   9
  -2  -2   0 139696. 3126.71   7
   2   2   0 138020. 3118.09   8
   2   2   1 58.4029 20.2867   6
   2  -2   1 51.9850 17.5398   5
   2  -2   1 47.3239 15.8285   2
   2   2   1 86.8982 19.6599   4
  -2   2  -1 52.2459 16.8891  13
   2  -2   1 46.6612 17.7959   9
  -2  -2  -1 30.4226 17.5257   9
  -2  -2  -1 47.1834 18.6393   7
   2   2   2 7300.35 182.012   4
   2  -2   2 7139.11 174.502   1
   2   2   2 6748.41 182.639   6
   2  -2   2 7034.61 177.582   5
  -2   2  -2 7264.00 169.967   6
   2   2   2 6687.61 181.301   5
   2  -2   2 7168.67 176.519   9
  -2  -2  -2 6999.27 183.297   9
  -2   2  -3 90.2772 12.8585   6
   2  -2   3 121.664 22.1880   5
  -2   2  -3 68.7718 20.1122   2
   2  -2   3 116.192 19.3017   1
  -2  -2  -3 58.0655 21.0911   4
   2   2   3 96.2815 25.2620   5
  -2  -2  -3 145.492 15.1811  10
   2  -2   3 185.792 23.2014   9
  -2  -2  -3 84.0195 26.2199   9
   2  -2   4 11044.3 267.335   5
   2   2   4 11105.0 276.750   5
   2  -2   4 10659.5 256.008   6
  -2   2  -4 10887.2 265.180   5
   2  -2   4 11258.5 260.536   1
  -2   2  -4 10858.6 264.771   2
  -2  -2  -4 10769.5 266.856   4
  -2  -2  -4 10967.7 257.385  10
  -2   2  -4 10608.3 266.048   9
  -2  -2  -4 10862.3 275.516   9
   2  -2   4 11188.7 266.748   9
   2   2   5 109.656 32.6241   7
   2  -2   5 167.306 17.0122   6
  -2   2  -5 204.769 26.9404   5
   2  -2   5 159.379 27.7424   5
  -2   2  -5 185.244 22.3378   2
   2  -2   5 187.302 20.7746   1
   2   2   5 194.286 34.4084   5
  -2  -2  -5 163.126 23.1939   4
  -2  -2  -5 225.669 21.2414  10
  -2   2  -5 150.538 28.4825  13
  -2   2  -5 206.619 27.9944   9
   2  -2   5 202.542 29.5116   9
  -2   2  -6 2090.74 73.4703   5
   2   2   6 2121.65 83.1998   5
   2  -2   6 2125.98 61.6098   6
   2  -2   6 2123.72 74.0179   5
  -2  -2  -6 2141.77 68.0044   4
   2  -2   6 2206.25 62.0200   1
  -2   2  -6 2021.56 66.2939   2
  -2  -2  -6 2123.22 65.2929  10
  -2   2  -6 2135.99 78.6638  13
   2  -2   6 2167.40 74.6942   9
   2   2   6 2144.81 85.1573   9
  -2   2  -6 2219.37 74.5544   9
   2   2   6 2164.00 84.5371   7
  -2   2  -7 2263.06 81.1208   5
   2  -2   7 2224.09 67.6688   6
   2   2   7 2338.92 90.0301   5
   2  -2   7 2227.61 80.0723   5
  -2  -2  -7 2351.98 65.9488   1
  -2   2  -7 2221.00 70.5384   2
   2  -2   7 2376.18 65.6701   3
  -2  -2  -7 2350.25 71.3231   4
   2  -2   7 2400.22 65.4223   1
  -2  -2  -7 2444.29 73.0309  10
  -2   2  -7 2296.71 85.1455  13
   2   2   7 2338.23 92.3615   7
   2   2   7 2528.35 94.8484   9
  -2   2  -7 2239.30 80.7919   9
   2  -2   7 2209.49 80.1280   9
   2   2   8 402.554 49.5243   7
   2  -2   8 356.789 27.8919   6
   2  -2   8 455.374 42.2807   5
  -2   2  -8 438.181 28.7994   4
   2  -2   8 397.816 23.7134   1
   2  -2   8 396.208 23.8014   3
  -2  -2  -8 378.623 24.3922   1
   2   2   8 323.777 48.0001   5
  -2  -2  -8 397.639 35.4539  10
  -2   2  -8 460.445 44.0544  13
   2   2   8 352.281 49.5365   9
  -2   2  -8 443.880 40.9496   9
  -2  -2  -8 372.127 47.5416   9
   2   2   8 398.673 38.8252  10
   2  -2   8 424.448 42.1879   9
   2   2   9 47.8611 44.9007   7
   2  -2   9 55.5923 26.0489   6
   2   2   9 44.2800 43.9104   5
   2  -2   9 73.9116 37.0626   5
  -2  -2  -9 37.3154 19.6883   2
   2  -2   9 41.6428 18.5929   1
   2  -2   9 65.7380 19.2492   3
  -2  -2  -9 37.2792 18.2052   1
  -2   2  -9 29.8951 20.2974   4
  -2   2  -9 60.2004 33.8684  13
  -2  -2  -9 53.3601 47.3424   9
   2  -2   9 56.7219 38.6135   9
   2   2   9 30.1903 46.3140   9
  -2   2  -9 60.7917 38.8217   9
   2  -2  10 1113.50 61.2844   5
  -2   2 -10 1055.18 63.7024   5
   2   2  10 1135.31 70.8776   5
  -2   2 -10 1030.37 37.6213   4
  -2  -2 -10 985.561 34.2014   2
  -2  -2 -10 916.791 33.4527   1
   2  -2  10 1030.31 33.9771   1
   2  -2  10 1104.85 62.5515  10
  -2   2 -10 1132.54 64.1744  13
  -2  -2 -10 1079.36 73.3401   9
   2   2  10 976.122 60.4234  10
   2  -2  10 1048.44 64.0060   9
  -2   2 -10 1047.81 61.6539   9
   2   2  10 1073.82 73.0839   7
   2   2  10 1014.09 72.6967   9
   2  -2  11 60.2933 43.6923   5
   2   2  11 76.1029 50.8170   5
   2   2  11 30.6391 53.0454   7
  -2   2 -11 22.8983 46.4817   5
  -2   2 -11-2.98039 40.3319  13
   2  -2  11 51.6715 45.8948  10
   2   2  11 12.0766 45.1034  10
   2   2  11-22.5194 53.8138   9
  -2   2 -11 68.3978 44.0671   9
  -2  -2 -11 75.5082 52.5389   9
   2  -2  11 96.2002 45.7841   9
   2   2  12 60.9769 53.6522   5
   2   2  12-4.03217 55.5885   7
   2  -2  12 163.444 47.3566   5
  -2   2 -12 57.0461 49.4054   5
  -2   2 -12 111.330 42.3655  13
   2  -2  12 76.0068 48.7120   9
   2  -2  12 139.298 50.8002  10
   2   2  12-30.7546 49.5191  10
   2   2  12 15.7126 57.1855   9
  -2   2 -12 95.9477 46.2448   9
  -2  -2 -12 63.8888 55.3525   9
   2  -2  13 951.237 53.8422   6
   2   2  13 841.461 79.1767   7
   2  -2  13 1010.64 67.5896   5
   2   2  13 949.247 76.2068   5
   2   2  13 1027.02 84.1212  11
   2  -2  13 1041.58 70.4720  10
  -2   2 -13 1054.33 68.7346  13
  -2  -2 -13 1099.39 80.1175   9
  -2   2 -13 1106.04 71.0437   9
   2   2  13 936.778 71.4426  10
   2  -2  13 997.885 71.7486   9
   2   2  13 1035.90 84.7429   9
   2  -2  14 641.944 49.0470   6
   2   2  14 586.723 77.0787   7
   2  -2  14 537.585 60.9550   5
   2   2  14 638.152 72.0262   5
  -2   2 -14 633.525 62.7064  13
   2   2  14 606.209 77.5620  11
  -2  -2 -14 653.715 74.7702   9
   2  -2  14 715.375 67.4143  10
  -2   2 -14 563.993 64.5380   9
   2   2  14 654.628 80.4245   9
   2  -2  14 582.484 67.4652   9
   2  -2  15 99.7703 40.4294   6
   2   2  15 54.2426 62.4446   5
   2  -2  15 61.0648 55.7375   5
   2   2  15 17.8414 66.8013   7
  -2   2 -15-33.0827 52.1722  13
   2   2  15 30.4332 69.1579   9
  -2  -2 -15 64.6446 66.3991   9
  -2   2 -15-26.5498 55.4282   9
   2  -2  15 6.76173 60.4701   9
   2  -2  15 120.170 62.1434  10
   2   2  16 806.259 88.1926   7
   2   2  16 792.717 78.5916   5
   2  -2  16 1030.67 77.5407   5
  -2   2 -16 774.602 70.5335  13
   2  -2  16 758.150 80.0522   9
  -2   2 -16 871.737 72.3315   9
   2   2  16 920.840 90.9153   9
  -2  -2 -16 961.671 86.5159   9
  -2  -3  17 215.676 67.9694   6
  -2   3  17 284.267 67.3814   5
  -2   3  17 136.656 65.3829   7
   2  -3 -17 141.799 39.8506  13
  -2  -3  17 173.517 57.4384  11
   2  -3 -17 202.337 71.8353   9
  -2  -3  16 122.852 36.8425   5
  -2   3  16 146.183 67.5289   7
  -2  -3  16 127.993 42.5806   7
  -2  -3  16 266.391 65.6170   6
  -2   3  16 190.356 62.9709   5
   2  -3 -16 94.1709 38.9706  13
   2   3 -16 87.5185 34.5368  13
  -2  -3  16 106.021 55.8477  11
   2  -3 -16 132.406 68.8165   9
   2  -3 -16 31.4808 66.0665  10
   2   3 -16 77.6811 36.4505   9
  -2  -3  15 183.532 35.5341   5
  -2   3  15 158.314 62.9267   7
  -2  -3  15 207.793 40.8044   7
  -2  -3  15 239.236 61.9954   6
  -2   3  15 172.153 63.1624   5
  -2  -3  15 164.382 51.5686  11
   2   3 -15 243.658 38.3139  13
   2  -3 -15 207.399 41.2600  13
  -2   3  15 237.063 68.0249  11
   2  -3 -15 123.164 65.8485   9
  -2  -3  15 178.415 62.9891  10
   2   3 -15 221.298 37.1646   9
  -2  -3  15 171.782 40.8418   9
   2  -3 -15 214.779 63.3704  10
  -2  -3  14 557.498 40.7757   5
  -2   3  14 611.425 68.7044   7
  -2  -3  14 528.522 63.1867   6
  -2   3  14 597.585 69.7951   5
   2  -3 -14 583.982 48.4273  13
   2   3 -14 533.583 44.5138  13
  -2   3  14 667.068 75.8446  11
   2   3 -14 574.231 41.4365   9
   2  -3 -14 677.480 66.8122  10
  -2  -3  14 562.641 44.4221   9
  -2  -3  14 614.053 69.5994  10
   2  -3 -14 622.391 70.7626   9
  -2  -3  14 664.505 47.5793   7
  -2  -3  13 586.881 65.2950   6
  -2  -3  13 515.856 36.4573   5
  -2   3  13 542.914 65.8342   7
  -2   3  13 433.600 63.4994   5
   2  -3 -13 424.372 27.0520   1
  -2  -3  13 534.682 28.0066   2
  -2  -3  13 420.873 27.3224   1
  -2   3  13 438.931 29.5512   4
   2  -3 -13 466.090 45.6279  13
   2   3 -13 582.938 43.7622  13
  -2   3  13 480.798 66.6309  11
   2   3 -13 521.476 36.7052   9
   2  -3 -13 710.424 71.9586   9
  -2  -3  13 527.101 42.1924   9
   2  -3 -13 456.853 59.4428  10
  -2   3  12 893.437 70.0258   7
  -2  -3  12 865.480 67.4759   6
  -2   3  12 954.043 73.9019   5
  -2  -3  12 994.223 42.5179   5
   2  -3 -12 928.046 38.1797   1
  -2  -3  12 885.684 40.9123   2
   2  -3 -12 928.221 39.0421   3
  -2   3  12 997.537 43.6872   4
  -2  -3  12 917.429 38.7399   1
   2  -3 -12 923.914 55.4891  13
   2  -3 -12 1023.93 67.3034  10
   2   3 -12 969.895 53.5656  13
  -2   3  12 987.106 75.6882  11
   2  -3 -12 1032.72 73.2552   9
  -2  -3  12 967.931 46.9489   9
   2   3 -12 976.006 42.3786   9
  -2  -3  11 10361.8 281.749   6
  -2   3  11 10896.5 287.464   7
  -2  -3  11 9632.25 252.231   5
   2  -3 -11 10662.7 252.826   1
  -2  -3  11 10845.9 258.939   2
  -2   3  11 10702.4 259.811   4
  -2  -3  11 10603.9 252.715   1
   2  -3 -11 10525.3 253.003   3
   2  -3 -11 10413.3 271.519  13
  -2   3  11 10752.4 291.111  11
   2   3 -11 10515.2 268.903  13
   2  -3 -11 11071.3 276.582  10
   2  -3 -11 10877.4 288.437   9
  -2  -3  11 10791.9 256.861   9
  -2  -3  10 752.817 58.7888   6
  -2  -3  10 803.534 34.8641   5
  -2   3  10 751.563 61.5400   7
  -2  -3  10 851.724 43.4258   2
  -2  -3  10 747.496 37.5296   1
  -2   3  10 873.050 44.1042   4
   2  -3 -10 798.905 38.5214   1
  -2  -3  10 762.495 57.1821  10
   2  -3 -10 797.185 49.6336  13
   2   3 -10 853.552 48.3134  13
  -2   3  10 819.513 64.8030  11
   2  -3 -10 998.031 58.7784  10
  -2  -3  10 723.554 36.4411   9
   2  -3 -10 700.323 60.5100   9
  -2   3   9 47.7734 39.2978   7
  -2  -3   9 65.1850 19.4441   5
  -2  -3   9 107.932 39.4027   6
   2  -3  -9 70.8438 37.8780   7
  -2   3   9 29.2043 25.2891   4
   2  -3  -9 40.0737 24.5396   1
  -2  -3   9 50.8851 26.4043   2
  -2   3   9 68.9551 44.1251  11
   2   3  -9 94.5121 29.8153  13
   2  -3  -9 29.4116 30.4260  13
  -2  -3   9 61.5303 20.8529   9
   2  -3  -9 55.4556 36.0609  10
   2  -3  -9 49.6042 43.6461   9
  -2  -3   9 67.6984 40.2594  10
  -2  -3   8 6723.27 196.784   6
  -2  -3   8 6844.43 172.646   5
  -2   3   8 7309.24 202.366   7
   2   3  -8 7126.85 173.348   5
   2  -3  -8 7058.53 180.949   1
  -2   3   8 7310.86 188.062   4
  -2  -3   8 7086.62 188.183   4
   2   3  -8 7543.94 193.500  13
   2  -3  -8 7122.74 193.541  13
  -2  -3   8 7174.45 184.510  13
  -2   3   8 7167.10 203.299  11
   2  -3  -8 7461.76 192.614  10
   2  -3  -8 7565.72 201.698   7
  -2  -3   8 7344.53 173.214   9
   2  -3  -8 7477.65 204.628   9
  -2  -3   7 8335.91 226.063   6
   2   3  -7 8675.62 200.954   5
  -2   3   7 8356.24 228.691   7
  -2  -3   7 8652.77 219.432   4
   2   3  -7 8459.70 220.968   4
   2  -3  -7 8436.36 211.778   1
  -2   3   7 8414.13 217.110   2
   2  -3  -7 8765.74 220.428  10
   2   3  -7 8491.54 221.642  13
   2  -3  -7 8157.95 222.432  13
  -2  -3   7 8411.03 215.734  13
  -2   3   7 8435.00 229.899  11
  -2  -3   7 8499.23 201.036   9
   2  -3  -7 8512.27 231.125   9
   2  -3  -7 8545.29 228.799   7
  -2   3   6 3898.71 124.764   7
   2   3  -6 3965.83 98.4972   5
  -2  -3   6 4230.24 123.908   6
  -2  -3   6 4029.48 106.839   7
  -2  -3   6 4150.11 118.586   4
   2   3  -6 3950.15 120.103   4
   2  -3  -6 4318.29 114.354   2
  -2   3   6 4067.79 116.693   2
  -2  -3   6 3890.78 116.987  12
   2   3  -6 3908.75 119.499  13
  -2  -3   6 3917.58 116.948  13
   2  -3  -6 3750.83 120.227  13
  -2  -3   6 4087.34 99.0867   9
  -2   3   6 4168.06 112.606   8
   2  -3  -6 4236.40 117.705  10
   2  -3  -6 3949.46 124.809   7
  -2  -3   5 1517.07 63.8560   6
  -2   3   5 1553.06 66.1465   7
   2   3  -5 1539.36 42.6415   5
  -2  -3   5 1541.67 51.4192   7
  -2   3   5 1532.12 59.0968   2
   2   3  -5 1497.49 62.4174   4
  -2  -3   5 1495.86 60.6131   4
   2  -3  -5 1555.60 56.7286   2
   2  -3  -5 1559.08 64.0107  13
  -2  -3   5 1493.52 60.4027  13
   2  -3  -5 1601.24 66.7953  11
  -2  -3   5 1543.86 59.3266  12
   2   3  -5 1514.60 61.8722  13
  -2  -3   5 1521.90 42.6542   9
  -2   3   5 1492.25 52.1457   8
   2   3  -4 10573.6 246.719   5
  -2  -3   4 10076.7 265.815   6
  -2  -3   4 10587.3 253.527   7
  -2   3   4 10236.3 267.512   7
   2  -3  -4 10795.0 260.149   2
  -2   3   4 10606.8 262.732   2
   2   3  -4 10534.7 267.104   4
  -2  -3   4 10372.6 264.630   4
   2  -3  -4 10851.1 268.645  11
  -2  -3   4 10343.4 244.238  11
   2   3  -4 10610.4 266.588  13
   2  -3  -4 10511.8 267.125  13
  -2  -3   4 10859.3 267.022  13
  -2   3   4 10815.8 269.267  13
  -2  -3   4 10133.0 259.819  12
  -2   3   4 10445.3 251.091   8
  -2  -3   4 10440.4 248.254   9
   2   3  -3 2195.67 68.5250   7
  -2   3   3 2289.42 79.3497   7
  -2  -3   3 2210.12 78.5126   6
  -2  -3   3 2273.18 68.9894   7
  -2   3   3 2314.69 76.0982   2
  -2  -3   3 2066.59 75.3023   4
  -2   3   3 2245.40 80.0507  13
  -2  -3   3 2295.52 59.4288  11
  -2  -3   3 2188.73 72.9273  12
  -2  -3   3 2371.19 81.0223  13
   2  -3  -3 2141.05 78.2290  13
   2   3  -3 2177.03 71.2453  12
   2  -3  -3 2297.28 77.7135  11
  -2  -3   3 2194.76 64.4078   9
   2  -3  -3 2328.14 63.1409   8
  -2   3   3 2409.45 63.8135   8
  -2  -3   2 22868.8 534.365   7
   2   3  -2 22672.2 534.459   7
  -2  -3   2 22771.3 542.921   6
   2  -3  -2 22513.8 542.741   7
  -2  -3   2 22254.9 541.041   4
  -2   3   2 22078.6 539.974   2
  -2   3   2 22389.2 545.906  13
   2  -3  -2 23465.4 541.062  11
  -2  -3   2 22727.4 524.343  11
   2   3  -2 23174.2 524.092  11
  -2  -3   2 23079.8 537.533  12
  -2  -3   2 23310.5 546.313  13
  -2  -3   2 22884.0 528.460   8
   2  -3  -2 22914.5 524.948   8
  -2  -3   2 22307.4 530.370   9
   2   3  -1 439.332 30.2894   7
  -2  -3   1 408.970 30.4318   7
   2   3  -1 437.761 35.1954   6
   2  -3  -1 481.140 34.3845   7
   2   3  -1 455.664 35.9525   4
  -2   3   1 384.694 30.6968   2
  -2  -3   1 469.403 23.5355  11
   2   3  -1 451.240 23.4853  11
  -2  -3   1 531.671 37.1760  13
  -2   3   1 385.737 34.4358  13
   2  -3  -1 456.064 31.0184  11
  -2  -3   1 437.413 30.9368  12
  -2  -3   1 446.878 21.0399   8
   2  -3  -1 447.565 21.5350   8
  -2  -3   1 512.067 28.3316   9
   2  -3   0 1556.19 58.8857   7
   2   3   0 1547.75 59.9211   6
  -2   3   0 1475.20 56.9016   2
   2   3   0 1474.20 59.3248   4
  -2   3   0 1561.66 62.8308  13
   2  -3   0 1399.80 54.5702  11
   2   3   0 1491.22 49.9799  11
  -2  -3   0 1434.44 53.9749   9
   2   3   0 1465.32 42.3779   8
   2   3   0 1374.58 54.4286   9
  -2  -3   0 1452.78 55.1451   7
   2   3   1 6290.73 167.069   6
   2  -3   1 6470.43 162.306   2
   2   3   1 6440.94 167.735   4
  -2   3  -1 6110.61 169.874  13
   2   3   1 6040.84 158.110  11
   2  -3   1 5909.39 159.100  11
  -2   3  -1 6078.64 143.632  12
  -2  -3  -1 5846.79 161.750   9
   2   3   1 6026.15 145.449   8
  -2  -3  -1 6031.28 163.260   7
   2   3   2 15315.0 379.560   6
  -2   3  -2 15411.0 365.876   6
   2  -3   2 15700.6 372.370   5
   2   3   2 16028.4 378.412   4
   2  -3   2 15661.8 371.156   2
   2  -3   2 16054.0 377.546  13
  -2  -3  -2 15690.7 376.729   9
   2  -3   2 15345.8 367.789   9
  -2  -3  -2 15574.7 376.693   7
  -2   3  -3 12655.0 302.999   5
  -2   3  -3 12457.5 298.017   6
   2  -3   3 12422.2 305.725   5
  -2   3  -3 12846.2 308.499   2
   2   3   3 12858.2 312.458   4
  -2  -3  -3 12643.5 309.842   4
   2  -3   3 12466.8 305.244   2
   2  -3   3 12734.2 311.050  13
   2  -3   3 12405.0 288.715  12
  -2  -3  -3 12204.3 312.889   7
  -2  -3  -3 12172.6 313.464   9
   2  -3   3 12241.5 301.909   9
  -2   3  -4 3685.52 98.1914   6
  -2   3  -4 3843.14 105.616   5
   2  -3   4 3880.27 108.642   5
   2   3   4 3678.38 112.133   4
  -2   3  -4 3873.99 110.222   2
   2  -3   4 3597.45 105.513   2
  -2  -3  -4 3596.92 110.327   4
   2  -3   4 3484.72 92.9595  12
  -2  -3  -4 3719.53 116.962   9
   2  -3   4 3676.79 105.113   9
  -2  -3  -4 3802.67 98.3322  10
   2  -3   5 2403.82 70.5883   6
   2  -3   5 2379.79 78.4402   5
  -2   3  -5 2277.23 75.5829   5
   2   3   5 2331.02 89.9656   5
   2   3   5 2339.03 80.7580   4
   2  -3   5 2289.81 74.4943   2
  -2   3  -5 2360.18 79.1193   2
  -2  -3  -5 2200.01 79.0457   4
  -2  -3  -5 2443.04 70.2440  10
  -2   3  -5 2269.76 87.6761  13
   2  -3   5 2387.38 77.1313   9
  -2  -3  -5 2406.91 89.1228   9
  -2   3  -6 3210.15 98.3236   5
   2  -3   6 3214.17 100.375   5
   2   3   6 3333.90 113.735   5
   2  -3   6 3271.03 91.0482   6
  -2  -3  -6 3085.62 98.5073   4
   2  -3   6 3104.92 92.2776   1
  -2   3  -6 3151.12 98.3251   2
  -2   3  -6 3260.24 111.508  13
  -2  -3  -6 3334.83 91.2897  10
  -2   3  -6 3235.39 100.286   9
   2   3   6 3339.78 116.010   7
   2  -3   6 3191.88 98.2388   9
   2  -3   7 462.281 41.0796   5
  -2   3  -7 477.588 39.2853   5
   2   3   7 441.368 51.8331   7
   2  -3   7 462.466 31.6158   6
  -2   3  -7 443.318 35.9119   4
   2  -3   7 452.855 32.3869   1
  -2  -3  -7 489.462 37.1296   4
   2   3   7 456.122 50.0495   5
   2   3   7 483.840 47.2884  11
  -2  -3  -7 540.879 35.2894  10
  -2   3  -7 391.080 45.2156  13
   2  -3   7 493.674 41.2323   9
  -2   3  -7 409.689 39.1221   9
   2   3   7 413.658 50.3925   9
   2  -3   8 9447.00 246.008   5
   2  -3   8 9637.55 235.560   6
   2   3   8 9578.65 262.317   5
  -2  -3  -8 9043.96 237.836   2
   2  -3   8 9718.34 232.000   1
  -2   3  -8 9307.80 240.382   4
  -2   3  -8 9365.20 258.416  13
   2   3   8 9327.34 262.947  11
  -2  -3  -8 9821.07 238.080  10
   2   3   8 9745.16 265.447   9
   2  -3   8 9550.93 245.750   9
  -2   3  -8 9615.02 246.330   9
   2   3   8 9393.32 265.596   7
   2  -3   9 2178.32 82.5425   5
   2  -3   9 2166.17 71.3767   6
   2   3   9 2292.29 98.5939   5
   2  -3   9 2139.16 65.5881   3
  -2   3  -9 2054.50 72.5439   4
  -2  -3  -9 2103.80 70.9338   2
  -2  -3  -9 2133.96 65.7365   1
   2  -3   9 2026.35 64.5213   1
  -2  -3  -9 2271.59 76.5834  10
   2   3   9 1925.56 95.0286  11
  -2   3  -9 2159.56 91.7236  13
  -2   3  -9 2176.94 82.6566   9
   2   3   9 1971.10 97.9722   9
  -2  -3  -9 2233.86 99.6965   9
   2   3   9 1925.74 96.0988   7
   2  -3   9 2133.03 82.7426   9
   2   3  10 1161.60 77.0444   5
   2  -3  10 992.162 60.9153   5
   2  -3  10 1135.80 51.0868   6
  -2   3 -10 1183.34 63.3923   5
  -2  -3 -10 1023.92 42.7807   1
   2  -3  10 1071.60 41.7920   1
  -2   3 -10 1068.54 47.8996   4
  -2  -3 -10 1018.01 44.9424   2
   2  -3  10 1040.98 42.3461   3
  -2  -3 -10 1148.10 57.3620  10
   2   3  10 1062.26 74.3279  11
  -2   3 -10 1078.43 68.9134  13
   2  -3  10 1057.02 64.5575   9
  -2   3 -10 1219.38 64.2791   9
  -2  -3 -10 1165.84 80.0195   9
   2   3  10 1106.63 78.6663   9
   2   3  10 1172.90 79.2366   7
   2  -3  11 1930.46 88.1008   5
  -2   3 -11 2285.29 91.4480   5
   2   3  11 2404.01 104.816   5
   2  -3  11 2259.39 77.1448   6
  -2  -3 -11 2075.73 65.3972   2
   2  -3  11 2352.31 63.7796   1
   2  -3  11 2286.64 64.4224   3
  -2  -3 -11 1936.42 63.0439   1
  -2   3 -11 2261.69 70.7019   4
  -2  -3 -11 2364.72 85.7402  10
   2  -3  11 2372.49 93.0461  10
   2   3  11 2233.06 106.693  11
  -2   3 -11 2327.91 100.681  13
  -2  -3 -11 2300.29 105.180   9
   2   3  11 2230.66 110.468   7
  -2   3 -11 2454.78 93.0479   9
   2   3  11 2219.99 106.934   9
   2  -3  11 2309.96 92.7074   9
   2  -3  12 1349.35 75.0409   5
  -2   3 -12 1721.64 82.4370   5
   2  -3  12 1573.40 64.2471   6
   2   3  12 1921.57 94.3989   5
   2  -3  12 1420.39 45.0990   1
  -2   3 -12 1567.62 50.8251   4
  -2  -3 -12 1321.04 45.1206   1
   2  -3  12 1998.32 86.1229  10
   2   3  12 1780.06 96.9400  11
  -2   3 -12 1749.50 86.5972  13
   2  -3  12 1667.83 81.1148   9
  -2   3 -12 1678.71 79.8252   9
   2   3  12 1576.77 96.3882   7
   2   3  12 1886.87 101.071   9
  -2  -3 -12 1704.24 94.7731   9
   2   3  13 272.062 64.0775   5
   2  -3  13 226.757 39.3749   6
   2  -3  13 116.507 53.1192   5
   2   3  13 229.835 66.4944   7
  -2   3 -13 181.485 55.6697   5
   2   3  13 110.993 62.5313  11
  -2   3 -13 194.147 54.6140  13
   2  -3  13 157.081 53.6062   9
   2   3  13 213.990 69.8574   9
  -2  -3 -13 241.382 68.7058   9
  -2   3 -13 222.776 54.0396   9
   2  -3  13 179.784 56.5442  10
   2   3  14 167.219 68.7832   7
   2  -3  14-16.3724 38.6394   6
   2   3  14 36.9395 62.0055   5
   2  -3  14-5.70486 52.8278   5
  -2   3 -14 3.63898 55.4764  13
   2   3  14 91.9916 69.8356  11
   2  -3  14 58.1101 55.1791   9
   2  -3  14 51.6525 60.0952  10
   2   3  14 40.5957 68.8554   9
  -2  -3 -14-36.6542 67.2158   9
  -2   3 -14 60.5654 55.0424   9
   2  -3  15 149.098 58.5583   5
   2   3  15 262.468 72.8052   7
   2   3  15 229.287 70.6754   5
   2  -3  15 179.591 43.1821   6
  -2   3 -15 287.182 60.1827  13
  -2   3 -15 151.117 58.1667   9
  -2  -3 -15 256.366 74.8198   9
   2  -3  15 234.796 61.7144   9
   2   3  15 246.708 79.1363   9
   2  -3  16-14.8711 61.4349   5
   2   3  16 53.6328 75.3180   7
  -2   3 -16-36.0508 58.4638  13
  -2  -3 -16 45.8868 73.6504   9
  -2   3 -16 63.9006 59.0667   9
  -2  -4  16 514.446 72.0613   6
  -2   4  16 679.904 81.0880   7
  -2   4  16 635.969 81.6367   5
  -2  -4  16 537.294 61.9809  11
   2   4 -16 596.118 51.4320  13
   2  -4 -16 499.319 53.4522  13
   2  -4 -16 617.166 75.1946  10
   2  -4 -16 605.125 83.9218   9
  -2   4  15 963.990 83.2803   7
  -2  -4  15 602.012 69.5149   6
  -2  -4  15 634.211 42.3658   5
  -2   4  15 951.559 86.5610   5
  -2  -4  15 578.727 27.9187   1
   2  -4 -15 607.137 29.6705   1
  -2  -4  15 574.842 27.8616   1
   2   4 -15 714.701 54.0739  13
   2  -4 -15 867.424 73.9346  10
   2  -4 -15 784.301 58.9716  13
   2  -4 -15 988.280 84.2327   9
  -2  -4  15 722.213 44.7254   9
  -2  -4  14 558.057 67.3221   6
  -2   4  14 701.554 75.4028   7
  -2  -4  14 427.345 37.1126   5
  -2   4  14 524.418 76.5159   5
  -2  -4  14 532.878 33.7596   1
   2  -4 -14 525.765 33.4801   1
  -2  -4  14 572.899 34.7269   2
   2  -4 -14 488.239 33.1719   3
  -2   4  14 509.099 37.7202   4
   2   4 -14 554.487 51.7128  13
  -2   4  14 529.687 76.8094  11
  -2  -4  14 486.754 39.0006   9
   2  -4 -14 655.181 66.7515  10
   2  -4 -14 786.227 78.9765   9
  -2  -4  13-19.6075 29.3058   5
  -2  -4  13 20.4283 52.8727   6
  -2   4  13 52.4348 58.3512   7
  -2  -4  13-4.16110 28.2026   1
  -2   4  13 39.0280 31.9694   4
   2  -4 -13 83.4067 30.3055   1
  -2   4  13-3.92421 62.0341   5
   2  -4 -13 66.0757 29.6642   3
  -2  -4  13 27.1135 29.4613   2
  -2   4  13 4.21003 58.5891  11
   2   4 -13-10.4413 38.4366  13
   2  -4 -13 55.1676 54.3320  10
  -2  -4  13 43.7717 30.0443   9
   2  -4 -13 47.9517 60.5893   9
  -2   4  12 7.81488 54.8266   7
  -2  -4  12 79.6395 50.1223   6
  -2  -4  12 51.2332 27.4602   5
  -2  -4  12 46.9772 30.5511   1
   2  -4 -12 29.2560 30.0338   1
   2  -4 -12 46.5386 31.3467   3
  -2  -4  12 52.5720 33.0748   2
  -2   4  12 61.2014 33.4169   4
   2   4 -12 50.8562 37.2094  13
  -2   4  12 80.6256 56.0223  11
   2  -4 -12 156.815 53.4901  10
   2  -4 -12 152.813 59.9038   9
  -2  -4  12 58.1675 28.4635   9
  -2   4  11 1735.96 91.8547   7
  -2  -4  11 1620.07 83.5550   6
  -2  -4  11 1646.44 67.5863   2
   2  -4 -11 1745.55 63.3712   1
  -2   4  11 1577.81 68.3434   4
   2   4 -11 1600.08 76.9636  13
   2  -4 -11 1827.21 82.4500  10
  -2   4  11 1684.64 92.0101  11
  -2  -4  11 1851.38 84.7814  10
  -2  -4  11 1769.54 57.1486   9
   2  -4 -11 1710.36 93.2686   9
  -2  -4  10 12117.9 325.594   6
  -2   4  10 12797.9 335.011   7
   2   4 -10 12412.7 295.655   5
  -2  -4  10 13076.3 313.002   2
  -2   4  10 12426.1 313.454   4
   2  -4 -10 12420.4 304.162   1
   2  -4 -10 12570.5 317.414  10
  -2  -4  10 12595.1 321.370  12
  -2  -4  10 12587.1 320.153  10
  -2   4  10 12177.4 333.225  11
   2   4 -10 12109.6 319.871  13
   2  -4 -10 13015.2 338.198   9
   2  -4 -10 13057.8 331.160   7
  -2  -4  10 12101.9 295.280   9
  -2   4   9 79.7861 45.7528   7
  -2  -4   9 134.772 30.0996   7
   2  -4  -9 86.2606 46.3239   7
  -2  -4   9 56.8498 42.1470   6
   2   4  -9 86.8735 21.2486   5
   2  -4  -9 57.7176 32.5594   1
  -2  -4   9 46.4901 34.3392   2
  -2   4   9 95.8532 34.6070   4
  -2  -4   9 78.0704 42.1117  12
  -2  -4   9 156.459 33.6617  13
   2   4  -9 60.4803 37.3666  13
  -2   4   9 48.0841 44.1467  11
   2  -4  -9 96.0115 49.9173   9
  -2  -4   9 66.8011 21.7651   9
   2  -4  -9 89.5975 41.0891  10
   2   4  -8 6241.67 153.297   5
  -2  -4   8 6331.94 164.743   7
  -2  -4   8 6228.41 183.024   6
  -2   4   8 6234.86 188.653   7
   2  -4  -8 6507.47 170.580   2
   2  -4  -8 5976.33 166.344   1
  -2  -4   8 6318.02 174.740   2
   2   4  -8 5840.09 176.945   4
  -2   4   8 6366.91 176.005   4
  -2  -4   8 6078.17 174.836  12
  -2  -4   8 6333.83 173.362  13
  -2   4   8 6504.86 188.338  11
   2   4  -8 6201.03 180.483  13
   2  -4  -8 6796.82 176.725  10
  -2   4   8 6346.90 168.729   8
  -2  -4   8 6265.17 154.043   9
   2  -4  -8 6445.49 188.413   7
   2  -4  -8 6289.08 190.611   9
  -2  -4   7 208.908 41.7545   6
  -2   4   7 240.216 44.5020   7
   2   4  -7 222.094 19.2609   5
   2  -4  -7 172.873 41.2150   7
  -2  -4   7 208.749 29.3123   7
  -2  -4   7 250.426 37.4107   4
   2  -4  -7 226.814 32.7863   2
   2   4  -7 208.651 35.9621   4
  -2   4   7 179.783 34.1980   4
  -2  -4   7 178.741 35.6464  13
  -2  -4   7 229.570 37.1539  12
   2   4  -7 184.738 35.0985  13
   2  -4  -7 160.606 38.9055  13
   2  -4  -7 196.965 42.0382  11
  -2   4   7 244.975 41.5849  11
  -2   4   7 209.057 29.2550   8
   2  -4  -7 151.778 37.0504  10
  -2  -4   7 179.122 19.9516   9
   2  -4  -6 9222.74 256.535   7
   2   4  -6 9719.69 227.316   5
  -2  -4   6 9700.13 255.620   6
  -2   4   6 9581.61 258.347   7
  -2  -4   6 9803.77 239.207   7
   2   4  -6 9425.35 253.704   4
   2  -4  -6 9615.87 245.020   2
  -2  -4   6 9571.56 251.126   4
   2  -4  -6 9520.18 257.924  11
   2  -4  -6 9723.77 256.499  13
  -2  -4   6 9611.83 250.834  13
  -2  -4   6 9448.79 245.600  12
   2   4  -6 9408.36 254.073  13
  -2  -4   6 9467.54 227.281   9
  -2   4   6 9499.71 235.103   8
   2   4  -5 263.151 21.8858   5
  -2  -4   5 266.618 29.8992   7
  -2  -4   5 298.760 41.4245   6
  -2   4   5 225.826 39.4741   7
   2   4  -5 254.025 36.0027   4
  -2   4   5 227.908 35.0188   2
   2  -4  -5 298.186 33.4949   2
  -2  -4   5 316.047 36.4956   4
  -2  -4   5 244.642 19.9271  11
   2  -4  -5 211.862 37.2370  13
   2   4  -5 273.253 36.7862  13
  -2  -4   5 293.806 33.8363  12
   2  -4  -5 261.409 38.2819  11
  -2  -4   5 292.129 37.5027  13
  -2   4   5 321.481 24.0109   8
   2   4  -4 958.729 40.5079   5
  -2  -4   4 980.806 55.7846   6
   2   4  -4 1056.23 53.9947   6
  -2   4   4 911.415 54.8781   7
  -2  -4   4 1019.99 46.1190   7
   2  -4  -4 1100.52 51.6348   2
  -2  -4   4 953.221 54.6141   4
   2   4  -4 970.476 55.9340   4
  -2   4   4 1023.08 54.1486   2
   2  -4  -4 1055.13 58.2020  13
  -2  -4   4 942.893 48.5737  12
   2   4  -4 907.729 46.0756  12
   2   4  -4 981.892 55.4189  13
  -2   4   4 946.610 56.7400  13
   2  -4  -4 974.594 53.5495  11
  -2  -4   4 1043.69 57.3401  13
  -2  -4   4 938.356 34.6329  11
  -2   4   4 930.361 35.3811   8
   2  -4  -4 848.047 56.2890   9
  -2  -4   4 950.334 40.4279   9
   2   4  -3 1302.55 54.2964   7
  -2  -4   3 1339.28 54.8457   7
  -2  -4   3 1267.23 62.0240   6
  -2   4   3 1346.06 60.1511   2
  -2  -4   3 1422.37 63.7394   4
   2  -4  -3 1183.08 64.0423  13
  -2  -4   3 1293.05 43.0527  11
  -2  -4   3 1245.15 55.4889  12
  -2  -4   3 1209.05 64.1253  13
   2  -4  -3 1287.39 60.4539  11
   2   4  -3 1300.93 54.8004  12
  -2   4   3 1307.90 65.2965  13
  -2  -4   3 1368.24 51.4017   9
   2   4  -2 5242.20 148.279   7
  -2  -4   2 5382.45 148.245   7
  -2  -4   2 4964.00 154.901   6
   2  -4  -2 5535.25 156.797   7
  -2   4   2 5751.06 155.535   2
  -2  -4   2 5558.70 157.018   4
  -2  -4   2 5194.63 147.913  12
  -2  -4   2 5464.13 137.182  11
   2   4  -2 5276.20 148.152  12
   2  -4  -2 5381.90 152.164  11
  -2   4   2 5316.03 161.110  13
   2   4  -2 5378.72 136.198  11
  -2  -4   2 5407.33 160.131  13
  -2  -4   2 5230.63 135.667   8
   2  -4  -2 5480.44 131.554   8
  -2  -4   2 5239.69 143.889   9
   2   4  -1 1162.61 54.8645   7
  -2  -4   1 1136.38 52.9380   7
   2  -4  -1 1111.90 57.7202   7
   2   4  -1 1201.03 59.9837   4
  -2   4   1 1178.34 57.1149   2
   2   4  -1 1174.96 52.4565  12
  -2  -4   1 1192.26 45.2950  11
   2  -4  -1 1233.47 55.0437  11
  -2   4   1 1159.96 61.5628  13
   2   4  -1 1151.46 44.7773  11
  -2  -4   1 1183.53 62.9821  13
   2  -4  -1 1200.84 38.6436   8
  -2  -4   1 1162.30 51.2334   9
  -2  -4   1 1191.63 38.1699   8
   2   4   0 2443.50 88.7817   6
   2  -4   0 2429.01 86.2441   7
  -2   4   0 2476.55 86.9041   2
   2   4   0 2371.93 87.7360   4
   2   4   0 2571.72 76.7916  11
   2  -4   0 2341.87 80.9936  11
  -2  -4   0 2419.05 75.8391  11
  -2   4   0 2465.26 94.2529  13
  -2  -4   0 2295.89 80.9524   9
  -2  -4   0 2505.85 85.0326   7
   2   4   1 1685.49 75.0162   6
  -2   4  -1 1670.53 66.0865   6
   2  -4   1 1730.95 69.6209   7
   2  -4   1 1683.67 68.0032   2
   2   4   1 1777.29 73.2649   4
  -2   4  -1 1760.84 51.0050  12
  -2   4  -1 1816.79 79.0994  13
   2   4   1 1748.20 64.3443  11
   2  -4   1 1809.69 66.2122  11
   2   4   1 1663.10 45.3008   8
  -2  -4  -1 1671.48 69.7537   7
  -2  -4  -1 1772.61 69.0780   9
   2   4   1 1772.76 71.4435   9
  -2   4  -2 2204.84 73.1714   6
  -2   4  -2 2097.05 73.3303   5
   2   4   2 1959.08 83.1607   6
   2  -4   2 2030.50 75.8144   2
   2   4   2 2039.03 80.2854   4
   2  -4   2 2083.43 72.5499  11
  -2   4  -2 1950.24 54.8834  12
   2   4   2 2215.35 75.6718  11
   2   4   2 2014.57 53.5370   8
  -2  -4  -2 2084.73 79.9246   7
  -2  -4  -2 2116.51 79.6877   9
  -2   4  -3 934.038 44.8945   6
   2   4   3 828.732 54.8843   6
  -2   4  -3 881.901 45.1099   5
   2   4   3 884.989 52.7635   4
   2  -4   3 870.879 46.9316   2
  -2   4  -3 781.836 48.9118   2
  -2  -4  -3 832.672 50.9460   4
   2  -4   3 868.021 51.3550  13
   2   4   3 769.435 49.3783  11
  -2  -4  -3 902.042 54.1895   9
   2  -4   3 924.754 45.6734   9
  -2  -4  -3 880.906 52.5769   7
  -2   4  -4 2968.20 88.8778   6
   2  -4   4 2878.95 96.1930   5
  -2   4  -4 3028.40 91.7081   5
  -2   4  -4 3100.17 100.626   2
   2   4   4 3061.60 102.381   4
   2  -4   4 2917.56 94.9857   2
  -2  -4  -4 3088.21 100.910   4
   2  -4   4 2919.44 77.3633  12
   2  -4   4 2890.75 100.699  13
   2  -4   4 2990.75 91.4073   9
  -2  -4  -4 2973.25 104.376   9
  -2  -4  -4 2851.91 102.903   7
  -2   4  -5 2307.54 76.6733   5
  -2   4  -5 2065.23 70.5059   6
   2  -4   5 2412.98 83.0219   5
   2   4   5 2320.67 86.5970   4
  -2  -4  -5 2355.90 84.7499   4
   2  -4   5 2327.09 79.7438   2
   2  -4   5 2118.20 64.5766  12
   2  -4   5 2490.77 87.0337  13
  -2   4  -5 2381.65 93.6182  13
  -2  -4  -5 2248.78 71.4294  10
   2  -4   5 2246.29 77.1549   9
  -2  -4  -5 2292.40 92.1982   9
   2   4   6 7216.83 214.008   7
   2  -4   6 7400.87 196.950   5
   2   4   6 7343.10 211.816   5
   2   4   6 7569.16 203.094   4
   2  -4   6 7552.45 194.501   2
  -2  -4  -6 7243.46 199.102   4
  -2   4  -6 7085.08 200.142   4
  -2   4  -6 7126.06 211.598  13
   2  -4   6 7204.20 181.387  12
  -2  -4  -6 7573.42 187.077  10
   2   4   6 7448.11 214.282   9
   2  -4   6 7373.67 192.405   9
  -2  -4  -6 6990.79 208.862   9
   2   4   7 1663.56 88.4676   7
   2  -4   7 1803.60 73.1150   5
   2  -4   7 1792.81 65.6256   6
   2   4   7 1760.56 88.3429   5
   2   4   7 1875.72 76.2349   4
   2  -4   7 1868.34 68.9136   2
  -2   4  -7 1846.13 74.2227   4
  -2  -4  -7 1654.32 70.0823   2
   2  -4   7 1776.15 66.9527   1
   2  -4   7 1741.72 60.9538  12
  -2  -4  -7 1759.55 64.1653  10
  -2   4  -7 1761.41 84.9688  13
   2  -4   7 1843.52 70.6312   9
   2   4   7 1774.80 89.1379   9
   2  -4   8 66.3984 28.7983   6
   2   4   8 40.1636 49.5024   7
   2  -4   8 61.3548 37.0075   5
  -2  -4  -8 21.4051 31.5893   2
   2  -4   8 40.4856 31.5269   1
  -2   4  -8 86.4810 34.4391   4
   2   4   8 36.6373 50.0894   5
  -2   4  -8 68.9108 44.2440  13
   2   4   8 80.6815 54.7591   9
   2  -4   8 49.3544 35.4495   9
  -2  -4  -8 111.651 33.2383  10
   2  -4   9 500.415 39.9758   6
   2  -4   9 503.778 48.7773   5
   2   4   9 417.056 62.4172   7
  -2   4  -9 489.144 44.1089   4
   2   4   9 561.367 67.0631   5
   2  -4   9 487.872 39.4341   1
  -2  -4  -9 372.244 40.5742   2
   2   4   9 453.319 59.8958  11
  -2   4  -9 451.546 55.9070  13
  -2  -4  -9 513.593 44.8306  10
   2   4   9 463.870 65.5200   9
   2  -4   9 521.325 48.7493   9
   2   4  10 4588.32 172.085   7
   2   4  10 5126.24 170.091   5
  -2   4 -10 5132.57 148.518   5
   2  -4  10 4815.82 148.544   5
   2  -4  10 4992.22 139.351   6
   2  -4  10 5225.99 134.110   1
  -2   4 -10 4701.80 141.516   4
  -2  -4 -10 5013.14 139.862   2
  -2  -4 -10 4953.67 142.025  10
   2   4  10 5031.93 170.062  11
  -2   4 -10 5000.80 165.871  13
  -2  -4 -10 4840.33 169.186   9
   2   4  10 5053.90 173.248   9
   2  -4  10 5071.43 149.097   9
  -2   4 -11 49.4351 43.9759   5
   2  -4  11 79.3756 44.9645   5
   2  -4  11 102.083 35.6232   6
   2   4  11 100.871 61.6276   7
   2  -4  11 90.3323 29.5532   1
   2   4  11 31.9621 59.5186   5
   2  -4  11 70.5893 30.0193   3
  -2  -4 -11 84.9473 31.4893   1
  -2  -4 -11 79.1793 30.6969   2
  -2   4 -11 30.8999 34.0003   4
  -2   4 -11 66.5370 49.4258  13
   2   4  11 67.7695 55.6400  11
   2  -4  11 47.9776 45.4969   9
  -2  -4 -11 113.589 43.4520  10
   2   4  11 57.2218 63.9804   9
  -2  -4 -11 53.3777 61.8516   9
   2  -4  12 1183.47 57.2190   6
  -2   4 -12 1280.70 71.0228   5
   2  -4  12 1162.55 68.6509   5
   2   4  12 1303.27 94.3238   7
   2   4  12 1277.53 88.6956   5
   2  -4  12 1119.45 46.0373   3
  -2   4 -12 1116.70 54.1364   4
  -2  -4 -12 1037.39 47.2051   2
  -2  -4 -12 1079.21 46.0371   1
   2  -4  12 1098.60 45.8292   1
  -2   4 -12 1120.48 78.2687  13
   2   4  12 983.571 85.1753  11
   2  -4  12 1089.89 75.3912  10
  -2  -4 -12 1070.69 64.1352  10
  -2  -4 -12 1087.56 87.4561   9
   2  -4  12 1091.50 70.3633   9
   2   4  12 1166.91 91.1269   9
   2   4  13 48.8879 64.4084   5
   2  -4  13 71.1408 38.2155   6
   2  -4  13 142.491 51.4918   5
   2   4  13 88.2032 70.0435   7
   2  -4  13 61.5591 26.5489   3
  -2   4 -13 39.6255 51.1226   5
  -2   4 -13 19.9046 28.9543   4
  -2  -4 -13-13.4246 27.6772   1
  -2  -4 -13 58.8608 26.3319   1
   2  -4  13 63.7509 25.6246   1
   2   4  13 46.0807 61.2789  11
  -2   4 -13 104.993 57.2827  13
   2   4  13 47.0596 70.9707   9
   2  -4  13 116.564 51.2204   9
  -2  -4 -13 52.0287 68.8016   9
   2  -4  13-17.7782 58.8843  10
   2  -4  14 8.45366 51.9496   5
   2  -4  14 21.6960 38.7988   6
   2   4  14 61.6381 67.7404   5
   2   4  14-5.04197 70.8414   7
  -2  -4 -14 35.0639 13.0963   1
  -2  -4 -14 15.1658 11.8505   3
  -2   4 -14 49.5592 55.0134   5
  -2  -4 -14 40.5671 12.2337   1
  -2   4 -14-24.3005 58.1532  13
   2   4  14-9.67687 74.0563   9
   2  -4  14-5.78829 52.8627   9
   2  -4  14 157.181 64.6397  10
  -2  -4 -14 4.40446 72.8571   9
   2  -4  15 165.875 56.8778   5
   2   4  15 227.215 80.2161   7
  -2   4 -15 311.957 65.0014  13
  -2  -4 -15 272.514 79.1672   9
   2  -4  15 107.838 59.5096   9
  -2   5  16 103.475 79.3867   7
  -2  -5  16 7.26647 63.8943   6
   2  -5 -16 0.66762 27.1774   1
   2  -5 -16-33.0522 52.5228  13
  -2  -5  16 94.5536 66.5503  12
   2   5 -16 88.0055 47.1862  13
  -2   5  16 79.9865 59.0830   8
   2  -5 -16 71.4439 66.9258  10
   2  -5 -16 189.917 78.7115   9
  -2   5  15-9.28467 70.3895   7
  -2  -5  15-58.5471 64.9310   6
   2  -5 -15 27.0320 32.1020   3
   2  -5 -15 58.3850 32.9368   1
  -2   5  15-71.9640 77.0705   5
   2  -5 -15 28.3403 51.1918  13
  -2  -5  15 73.4827 61.2860  12
   2   5 -15-2.88465 47.5568  13
   2  -5 -15 85.7891 74.5190   9
  -2   5  15 85.3329 56.5259   8
   2  -5 -15 87.5307 63.1647  10
  -2   5  14 2193.22 114.188   5
  -2  -5  14 1885.68 75.1789   7
  -2   5  14 2035.19 113.130   7
  -2  -5  14 2051.91 103.031   6
  -2   5  14 2078.58 79.0893   4
  -2  -5  14 2078.55 70.2956   1
  -2  -5  14 1937.64 72.2138   2
   2   5 -14 2179.38 92.3146  13
  -2  -5  14 1716.15 95.5238  12
   2  -5 -14 2144.41 96.9877  10
   2  -5 -14 1893.40 92.3321  13
   2  -5 -14 1994.31 112.172   9
  -2  -5  14 1679.09 61.2349   9
  -2   5  14 2047.20 93.3437   8
  -2  -5  13 83.4664 59.6161   6
  -2  -5  13 35.7094 38.1931   7
  -2   5  13 22.3299 64.6063   7
  -2  -5  13 34.5286 37.0410   1
  -2  -5  13-13.7393 37.9696   2
  -2   5  13 39.3281 40.3940   4
   2   5 -13 126.616 47.9299  13
  -2  -5  13 22.2898 53.8029  12
   2  -5 -13 3.34021 48.1046  13
  -2   5  13 22.2984 59.8189  11
  -2   5  13 16.6172 49.4834   8
  -2  -5  13-19.6783 28.7346   9
   2  -5 -13 42.6032 56.0767  10
   2  -5 -13-75.1123 66.9917   9
  -2  -5  12 68.3225 57.6978   6
  -2  -5  12 41.8073 37.4439   7
  -2   5  12 60.8856 62.2606   7
  -2   5  12 79.7623 40.3880   4
  -2  -5  12-24.1977 39.3939   2
   2  -5 -12 16.9283 46.4375  13
  -2   5  12 184.644 63.0470  11
  -2  -5  12 97.4821 51.0294  12
   2   5 -12 81.3581 48.6782  13
  -2   5  12 51.2709 44.8632   8
  -2  -5  12 36.4868 58.5303  10
  -2  -5  12 22.0311 27.1980   9
   2  -5 -12 8.65136 64.3342   9
   2  -5 -12 97.8806 52.0752  10
  -2  -5  11 1675.06 90.2317   6
  -2   5  11 1829.02 100.803   7
  -2  -5  11 1758.19 70.2663   7
   2   5 -11 1639.28 56.6533   5
  -2  -5  11 1799.55 77.5488   2
  -2   5  11 1672.08 77.3208   4
   2   5 -11 1608.18 83.8126  13
   2  -5 -11 1739.17 83.4259  10
   2  -5 -11 2012.57 91.5361  13
  -2   5  11 1768.13 96.3327  11
  -2  -5  11 1727.05 82.8340  12
   2  -5 -11 1752.75 93.2917   7
   2  -5 -11 1894.99 101.528   9
  -2  -5  11 1753.04 57.8900   9
  -2   5  11 1636.38 75.7913   8
  -2   5  10 4629.47 162.810   7
  -2  -5  10 4616.35 134.045   7
  -2  -5  10 4516.16 154.263   6
   2   5 -10 4603.22 119.120   5
  -2  -5  10 4638.11 142.583   2
   2  -5 -10 4451.06 134.042   1
   2   5 -10 4588.79 146.381   4
  -2   5  10 4727.05 143.667   4
  -2  -5  10 4358.90 144.172  12
  -2   5  10 4838.78 162.918  11
   2  -5 -10 4605.88 152.028  13
  -2  -5  10 4522.71 139.127  13
   2  -5 -10 4762.36 144.882  10
   2   5 -10 4684.06 152.104  13
  -2  -5  10 4643.43 120.274   9
   2  -5 -10 4705.89 164.220   9
   2  -5 -10 4763.04 158.945   7
   2   5  -9 746.975 35.2250   5
  -2  -5   9 768.420 48.8009   7
  -2  -5   9 722.248 64.5118   6
  -2   5   9 730.022 69.4280   7
  -2   5   9 825.882 57.6651   4
  -2  -5   9 745.724 56.4596   2
   2   5  -9 688.924 57.5928   4
   2  -5  -9 665.074 57.9740  10
  -2  -5   9 628.704 56.3035  12
   2   5  -9 788.659 61.4396  13
   2  -5  -9 667.809 60.4987  13
  -2   5   9 607.154 65.9402  11
  -2  -5   9 771.191 54.4189  13
  -2   5   9 703.954 46.3659   8
   2  -5  -9 778.418 69.7491   7
  -2  -5   9 713.038 35.1144   9
   2  -5  -9 753.032 70.9122   9
   2  -5  -8 446.013 59.1852   7
  -2  -5   8 286.121 51.9195   6
  -2   5   8 398.823 57.4767   7
   2   5  -8 383.599 27.6029   5
  -2  -5   8 387.733 39.1781   7
  -2   5   8 383.279 47.0846   4
  -2  -5   8 374.437 49.6290   2
   2   5  -8 397.915 50.5368   4
   2  -5  -8 340.255 42.6051   2
  -2  -5   8 351.581 45.5915  12
  -2  -5   8 351.755 43.7705  13
   2   5  -8 459.794 52.6403  13
   2  -5  -8 314.064 50.8619  13
  -2   5   8 375.684 54.0773  11
  -2   5   8 323.394 35.7680   8
   2  -5  -8 289.842 47.3689  10
  -2  -5   8 376.422 28.9295   9
  -2  -5   7 271.890 37.0719   7
   2  -5  -7 227.995 48.6082   7
   2   5  -7 192.797 24.1775   5
  -2   5   7 164.011 47.9583   7
  -2  -5   7 287.297 49.4095   6
  -2  -5   7 205.052 42.4821   2
  -2   5   7 229.669 41.4912   4
   2   5  -7 202.865 44.4520   4
  -2  -5   7 259.413 26.0255  11
  -2  -5   7 261.763 41.7371  12
   2   5  -7 243.245 44.1287  13
   2  -5  -7 205.209 47.9779  11
  -2   5   7 249.868 46.4212  11
   2  -5  -7 184.228 45.9677  13
  -2  -5   7 156.984 40.9728  13
  -2   5   7 257.485 29.4106   8
  -2  -5   7 231.044 24.8692   9
   2   5  -6 462.754 30.5412   5
  -2  -5   6 549.522 43.0575   7
  -2  -5   6 492.966 52.8660   6
  -2   5   6 598.458 57.5000   7
   2   5  -6 505.119 52.7502   4
  -2   5   6 472.925 47.6488   4
  -2  -5   6 529.946 50.0306  13
  -2  -5   6 527.972 45.3309  12
  -2  -5   6 400.706 27.9838  11
   2   5  -6 490.459 52.7597  13
   2  -5  -6 323.927 47.9771  13
   2  -5  -6 436.228 50.6452  11
  -2  -5   6 488.349 30.9325   9
  -2   5   6 523.118 31.1295   8
   2   5  -5 522.905 47.4333   6
  -2  -5   5 450.477 41.3007   7
  -2  -5   5 553.174 53.6866   6
   2   5  -5 545.780 34.8804   5
  -2   5   5 519.076 52.7039   7
  -2   5   5 530.280 49.6925   4
  -2  -5   5 443.633 46.1386   4
   2   5  -5 445.374 48.6589   4
   2   5  -5 498.084 50.4083  13
  -2  -5   5 526.128 43.6408  12
  -2  -5   5 510.185 29.9636  11
  -2  -5   5 506.004 51.8285  13
   2  -5  -5 435.444 48.0194  11
   2  -5  -5 545.565 55.4326   9
  -2  -5   5 467.177 35.3847   9
  -2   5   5 459.084 26.1520   8
   2   5  -4 91.2822 28.6483   5
  -2  -5   4 108.349 32.6337   7
   2   5  -4 90.5236 38.2357   6
  -2  -5   4 110.572 41.3176   6
  -2   5   4 70.8669 37.5722   7
  -2   5   4 113.362 37.8934   4
  -2  -5   4 116.213 36.9333   4
   2   5  -4 82.0944 37.1383   4
  -2   5   4 80.2968 38.2281  13
   2  -5  -4 92.3703 35.7099  11
  -2  -5   4 107.661 21.3039  11
  -2  -5   4 74.2708 35.0665  12
  -2  -5   4 115.120 42.7096  13
   2   5  -4 185.288 32.4671  12
   2  -5  -4 88.6764 39.9415   9
  -2  -5   4 70.2468 27.9885   9
   2   5  -3 3929.35 117.974   7
  -2  -5   3 3788.50 118.587   7
   2  -5  -3 3771.80 128.139   7
  -2  -5   3 3689.35 127.041   6
   2   5  -3 3621.37 124.284   6
  -2  -5   3 3863.65 127.009   4
   2   5  -3 3884.72 116.254  12
  -2  -5   3 3843.89 105.149  11
  -2  -5   3 3736.08 117.200  12
  -2   5   3 3820.39 132.940  13
   2  -5  -3 3763.99 122.874  11
  -2  -5   3 3894.89 132.046  13
  -2  -5   3 3698.48 104.709   8
  -2  -5   3 3779.99 113.242   9
   2   5  -2 4509.90 137.333   7
   2  -5  -2 4786.10 147.255   7
  -2  -5   2 4384.74 145.285   6
  -2  -5   2 4650.21 138.423   7
  -2  -5   2 4418.64 143.590   4
  -2   5   2 4426.53 142.119   2
  -2   5   2 4428.36 150.103  13
   2  -5  -2 4697.42 140.164  11
   2   5  -2 4663.51 124.326  11
   2   5  -2 4740.83 136.297  12
  -2  -5   2 4785.09 125.681  11
  -2  -5   2 4668.09 150.412  13
  -2  -5   2 4639.29 133.856   9
  -2  -5   2 4604.47 119.080   8
   2  -5  -2 4514.72 113.102   8
  -2  -5   1 7910.96 213.049   7
   2  -5  -1 7851.83 217.879   7
   2   5  -1 8030.05 222.617   4
  -2   5   1 7824.00 217.026   2
  -2  -5   1 7966.72 200.402  11
   2   5  -1 7823.45 209.281  12
   2  -5  -1 8034.63 211.686  11
  -2  -5   1 8180.18 226.791  13
   2   5  -1 7420.26 199.285  11
  -2   5   1 7996.40 227.247  13
   2  -5  -1 7556.74 187.293   8
  -2  -5   1 7935.38 187.486   8
  -2  -5   1 7682.52 208.894   9
  -2  -5   0 1022.52 57.3343   7
   2   5   0 791.868 58.0366   6
   2  -5   0 929.580 59.5181   7
  -2   5   0 877.732 56.0534   2
   2   5   0 997.256 59.4731   4
   2   5   0 1197.89 57.6162  12
   2   5   0 996.859 48.5859  11
  -2   5   0 903.219 41.2446  12
  -2  -5   0 1012.78 48.0346  11
  -2   5   0 975.155 62.7245  13
   2  -5   0 903.647 52.5792  11
  -2  -5   0 991.639 54.9169   9
  -2   5  -1 2044.69 80.3625   6
   2   5   1 1855.30 85.2072   6
   2  -5   1 1979.69 82.4122   7
   2   5   1 1959.42 84.0989   4
   2  -5   1 1805.39 78.4232   2
   2   5   1 2087.33 80.9723  12
   2   5   1 1934.51 73.1702  11
   2  -5   1 2033.71 76.0735  11
  -2   5  -1 1890.45 88.3764  13
  -2   5  -1 1819.99 59.6741  12
  -2  -5  -1 1928.16 79.0375   9
  -2  -5  -1 1903.38 81.4753   7
   2  -5   2 7429.88 206.549   7
   2   5   2 7698.86 214.164   6
  -2   5  -2 7659.29 201.235   6
   2  -5   2 7676.79 204.157   2
   2   5   2 7084.71 208.729   4
   2  -5   2 7578.80 198.909  11
   2  -5   2 7725.91 211.597  13
  -2   5  -2 6990.49 178.885  12
  -2  -5  -2 7346.16 207.333   7
  -2  -5  -2 7305.25 206.172   9
   2   5   3 7781.68 213.225   6
  -2   5  -3 7693.29 195.513   6
   2  -5   3 7667.08 204.290   7
  -2   5  -3 7659.43 207.475   4
   2   5   3 7695.50 208.257   4
  -2  -5  -3 7621.61 205.488   4
   2  -5   3 7823.46 201.310   2
   2  -5   3 7560.42 194.721  11
   2  -5   3 7753.06 207.729  13
  -2  -5  -3 7734.99 208.388   7
  -2  -5  -3 7706.53 208.082   9
   2   5   4 1602.11 80.3437   7
  -2   5  -4 1534.93 65.8642   6
  -2   5  -4 1543.71 75.7985   4
   2  -5   4 1681.72 72.6055   2
   2   5   4 1659.48 77.5762   4
  -2  -5  -4 1654.08 76.1612   4
   2  -5   4 1683.86 77.7232  13
  -2   5  -4 1559.31 84.3215  13
   2   5   4 1531.87 75.6903  11
   2  -5   4 1674.12 66.1760   9
  -2  -5  -4 1531.97 77.6732   7
  -2  -5  -4 1562.97 79.3197   9
   2   5   5 15.3743 41.5447   7
  -2  -5  -5 36.8826 41.1430   7
  -2   5  -5 25.7754 29.7547   6
   2   5   5 3.16781 37.5592   4
   2  -5   5 17.4045 33.3531   2
  -2   5  -5 33.5440 37.4969   4
   2  -5   5 15.1833 20.8683  12
   2   5   5 55.9942 41.9445  11
   2  -5   5 38.7068 36.1551  13
  -2   5  -5-16.2038 41.0052  13
   2  -5   5 23.0690 32.1996   9
  -2  -5  -5 51.8033 43.7611   9
   2  -5   6 7761.32 218.874   5
   2   5   6 7852.07 238.696   7
  -2  -5  -6 7884.32 222.516   2
  -2   5  -6 8062.56 225.766   4
   2   5   6 8520.35 229.205   4
   2  -5   6 8190.66 218.763   2
   2   5   6 8065.00 230.253  11
  -2   5  -6 8574.87 242.449  13
   2  -5   6 8539.83 227.075  13
   2  -5   6 8182.04 200.405  12
  -2  -5  -6 7721.25 232.990   9
  -2  -5  -6 8097.37 208.077  10
   2  -5   6 7884.75 211.529   9
   2   5   6 8728.20 241.553   9
   2   5   7 243.565 57.9892   7
   2  -5   7 339.314 45.1208   5
  -2   5  -7 263.339 45.2849   4
   2   5   7 235.004 46.1961   4
  -2  -5  -7 185.793 41.1068   2
   2  -5   7 273.569 40.6049   2
   2  -5   7 275.329 30.8204  12
  -2   5  -7 374.395 55.9936  13
  -2  -5  -7 384.680 57.5750   9
  -2  -5  -7 321.104 38.7925  10
   2  -5   7 286.551 41.0098   9
   2   5   8 887.911 79.5356   7
   2  -5   8 819.009 59.1622   5
  -2   5  -8 908.346 53.5618   5
   2   5   8 836.501 74.3698   5
  -2  -5  -8 869.123 58.0679   2
   2  -5   8 953.780 55.6992   2
   2   5   8 915.490 62.7483   4
  -2   5  -8 916.026 60.5171   4
   2  -5   8 795.222 44.1628  12
  -2  -5  -8 947.809 51.6744  10
  -2   5  -8 901.422 72.8655  13
   2  -5   8 844.917 55.8839   9
   2   5   8 963.251 78.8155   9
   2  -5   9 924.238 54.7049   6
  -2   5  -9 1011.98 58.2224   5
   2   5   9 907.331 82.3327   7
   2  -5   9 929.340 62.8396   5
   2  -5   9 888.139 53.6240   1
   2   5   9 884.016 78.5898   5
  -2   5  -9 909.298 61.0079   4
  -2  -5  -9 1012.35 55.4352  10
   2  -5   9 912.529 50.3033  12
  -2   5  -9 1010.39 77.2077  13
   2   5   9 942.713 80.6797   9
   2  -5   9 974.993 59.9936   9
   2  -5  10 1053.67 57.7151   6
  -2   5 -10 1128.63 63.9058   5
   2  -5  10 1016.72 66.2233   5
   2   5  10 989.530 88.0984   7
   2   5  10 982.110 83.3472   5
   2  -5  10 1002.22 56.6558   1
  -2   5 -10 1059.38 63.1211   4
  -2   5 -10 1096.44 83.3928  13
  -2  -5 -10 1065.83 59.6891  10
   2  -5  10 1031.45 55.9920  12
   2   5  10 1192.73 92.3636   9
   2  -5  10 1168.94 64.3539   9
   2   5  11 195.508 71.9041   7
   2  -5  11 232.516 40.6906   6
  -2   5 -11 196.758 47.9890   5
   2  -5  11 203.989 49.2830   5
   2   5  11 65.9387 63.1869   5
  -2   5 -11 210.704 45.5717   4
   2  -5  11 184.790 38.4419   1
   2  -5  11 234.690 43.8188  12
  -2   5 -11 195.898 60.6133  13
   2   5  11 214.619 66.6488  11
   2   5  11 253.505 74.5111   9
   2  -5  11 211.132 49.9099   9
  -2  -5 -11 264.238 69.5926   9
  -2  -5 -11 186.344 45.8771  10
  -2   5 -12 101.382 49.2548   5
   2  -5  12 22.0241 39.8425   6
   2  -5  12 10.9276 47.5263   5
   2   5  12-10.2745 68.9221   7
   2  -5  12 95.4329 37.4346   1
   2   5  12 71.4202 72.0593   5
   2  -5  12 89.7281 36.4539   3
  -2  -5 -12 65.9022 36.2172   1
  -2   5 -12 46.3380 40.4805   4
  -2   5 -12 49.2083 59.7080  13
   2  -5  12 78.3981 43.4217  12
   2   5  12 130.307 61.6761  11
   2   5  12 63.4321 71.0214   9
   2  -5  12 85.5989 50.3238   9
  -2  -5 -12 70.5108 47.5499  10
  -2  -5 -12 99.4618 70.2187   9
   2  -5  13 86.3241 53.6050   5
   2   5  13 121.032 78.4804   7
   2  -5  13 27.3179 39.6341   6
  -2   5 -13 55.7751 53.6109   5
   2  -5  13 51.3663 33.8170   1
  -2   5 -13 10.2447 37.5415   4
  -2  -5 -13 75.6960 34.8299   1
   2   5  13 106.925 74.2043   5
   2  -5  13 70.2698 33.9254   3
  -2   5 -13 44.9665 62.5829  13
   2  -5  13 67.3740 47.4677  12
  -2  -5 -13 2.26007 50.1221  10
  -2  -5 -13-60.1065 72.5431   9
   2   5  13 135.085 75.3468   9
   2  -5  13-6.29504 63.1878  10
   2  -5  13-21.6053 56.2002   9
   2  -5  14 1216.25 74.7165   5
   2   5  14 1171.77 101.503   7
  -2   5 -14 1252.86 76.7812   5
  -2  -5 -14 1012.35 48.6677   1
  -2  -5 -14 979.265 46.8973   1
  -2  -5 -14 1230.61 73.0033  10
  -2  -5 -14 1119.93 91.0867  13
   2  -5  14 1159.71 72.3576  12
  -2   5 -14 1206.87 90.9428  13
   2  -5  14 1306.67 77.4485   9
  -2  -5 -14 1096.88 97.3006   9
  -2  -6  15 188.741 69.0604   6
  -2   6  15 105.036 75.3659   7
   2  -6 -15 133.988 40.9527   3
   2  -6 -15 107.506 40.6303   1
   2   6 -15 170.174 56.8093  13
   2  -6 -15 134.119 58.7757  13
  -2  -6  15 90.0164 65.3237  12
  -2   6  15 93.2927 55.9394   8
   2  -6 -15 87.5560 78.3647   9
   2  -6 -15 66.7393 65.0582  10
  -2  -6  14 278.036 68.8287   6
  -2   6  14 227.232 78.6931   7
   2  -6 -14 286.608 45.9124   1
  -2   6  14 281.722 50.8842   4
  -2  -6  14 230.744 46.9808   2
  -2  -6  14 181.099 45.3101   1
  -2  -6  14 350.227 68.6574  12
   2   6 -14 222.126 58.6004  13
   2  -6 -14 306.213 63.4354  13
  -2   6  14 226.703 57.6587   8
   2  -6 -14 348.476 81.8962   9
   2  -6 -14 298.891 64.7879  10
  -2  -6  13 737.333 54.5041   7
  -2   6  13 733.909 87.5242   7
  -2  -6  13 636.596 74.4701   6
  -2   6  13 713.592 60.3811   4
  -2  -6  13 682.956 56.0209   2
   2  -6 -13 637.434 54.1011   1
   2   6 -13 591.388 66.4607  13
   2  -6 -13 606.854 67.8500  13
  -2  -6  13 693.471 68.4115  12
   2  -6 -13 662.193 68.1404  10
  -2   6  13 634.130 60.3110   8
  -2  -6  13 560.529 35.0731   9
   2  -6 -13 629.158 87.9197   9
   2   6 -12 1095.60 47.8651   5
  -2   6  12 1481.01 100.650   7
  -2  -6  12 1317.49 66.3215   7
  -2  -6  12 1475.95 87.8272   6
  -2   6  12 1403.51 76.1639   4
   2  -6 -12 1360.05 68.9105   1
  -2  -6  12 1347.17 73.1582   2
  -2  -6  12 1236.17 79.9783  12
  -2   6  12 1422.63 96.2802  11
   2  -6 -12 1408.71 79.0157  10
   2  -6 -12 1454.59 87.3402  13
   2   6 -12 1396.44 84.5720  13
   2  -6 -12 1347.73 98.6336   9
  -2  -6  12 1367.19 50.1288   9
  -2   6  12 1272.89 68.8168   8
  -2   6  11 1255.59 91.7294   7
  -2  -6  11 1357.52 84.9551   6
  -2  -6  11 1320.07 66.1540   7
   2   6 -11 1141.34 46.8684   5
  -2   6  11 1174.89 73.4690   4
   2  -6 -11 1140.26 66.4835   1
  -2  -6  11 1297.28 73.8271   2
   2   6 -11 1223.36 80.2288  13
  -2  -6  11 1278.59 76.7116  12
   2  -6 -11 1391.12 82.7637  13
  -2   6  11 1390.99 94.7797  11
   2  -6 -11 1283.15 75.5041  10
   2  -6 -11 1153.61 86.3945   7
  -2  -6  11 1146.83 48.5683   9
   2  -6 -11 1480.40 98.9295   9
   2  -6 -10 168.933 62.5647   7
  -2   6  10 230.950 65.4995   7
   2   6 -10 134.530 28.8895   5
  -2  -6  10 180.539 59.7008   6
  -2  -6  10 142.635 42.6242   7
  -2  -6  10 166.020 50.3868   2
  -2   6  10 65.5748 46.0343   4
   2  -6 -10 100.131 47.4039   1
   2   6 -10 202.946 54.2303   4
   2  -6 -10 187.578 44.7494   2
   2  -6 -10 169.669 56.5836  13
  -2  -6  10 144.085 31.6153  11
  -2  -6  10 110.136 50.7705  12
  -2   6  10 193.236 61.3157  11
   2   6 -10 174.608 53.9786  13
  -2  -6  10 168.755 45.9574  13
  -2  -6  10 210.459 29.7304   9
   2  -6 -10 29.8874 51.5625  10
   2  -6 -10 86.7849 67.0440   9
  -2   6   9 3349.32 137.306   7
  -2  -6   9 3565.21 131.453   6
   2   6  -9 3311.66 94.4595   5
  -2  -6   9 3512.18 113.995   7
  -2   6   9 3304.73 123.570   4
  -2  -6   9 3518.21 123.891   2
   2   6  -9 3564.89 129.681   4
   2  -6  -9 3621.84 118.144   2
  -2   6   9 3444.45 134.097  11
  -2  -6   9 3115.35 97.8297  11
   2  -6  -9 3540.45 120.790  10
  -2  -6   9 3447.86 119.623  12
   2  -6  -9 3583.65 133.964  13
   2   6  -9 3464.12 132.501  13
  -2  -6   9 3391.90 121.632  13
  -2   6   9 3298.03 101.204   8
   2  -6  -9 3460.36 136.214   7
  -2  -6   9 3461.43 96.0344   9
  -2   6   8 3261.13 134.197   7
  -2  -6   8 3558.14 130.160   6
   2   6  -8 3305.04 93.8252   5
  -2  -6   8 3402.38 112.608   7
   2   6  -8 3401.71 127.823   4
  -2   6   8 3539.37 125.666   4
  -2  -6   8 3515.33 124.229   2
   2  -6  -8 3486.26 117.045   2
  -2  -6   8 3040.90 95.1607  11
  -2  -6   8 3217.95 114.150  12
   2  -6  -8 3449.99 131.172  13
   2   6  -8 3376.84 130.640  13
  -2  -6   8 3551.02 123.486  13
   2  -6  -8 3371.78 134.178   7
  -2  -6   8 3234.92 94.5902   9
  -2   6   8 3276.66 95.9899   8
  -2  -6   7 1078.24 61.8715   7
  -2   6   7 1074.38 78.3247   7
   2   6  -7 1032.72 47.4828   5
  -2  -6   7 1033.11 73.3844   6
   2  -6  -7 1093.10 66.6983   2
  -2   6   7 1063.80 71.2883   4
   2   6  -7 1090.21 75.0948   4
  -2  -6   7 1097.87 72.1561   2
   2  -6  -7 1031.72 75.1587  11
  -2  -6   7 1131.91 64.5540  12
   2  -6  -7 1114.06 77.1637  13
  -2  -6   7 961.674 69.0114  13
   2   6  -7 1087.93 76.7855  13
  -2  -6   7 904.470 45.6384  11
   2  -6  -7 975.305 79.8646   7
  -2  -6   7 1062.66 47.1544   9
  -2   6   7 1013.37 42.7934   8
   2   6  -6 2192.94 91.9457   6
   2   6  -6 2251.66 73.7136   5
  -2  -6   6 2213.57 86.7331   7
  -2   6   6 2221.10 102.579   7
  -2  -6   6 2282.64 101.754   6
  -2  -6   6 2043.90 95.2924   2
   2   6  -6 2128.38 101.101   4
   2  -6  -6 2238.95 92.5962   2
  -2   6   6 2166.56 96.0952   4
  -2  -6   6 2065.71 84.8569  12
  -2  -6   6 2184.12 98.5095  13
   2   6  -6 2213.05 102.023  13
   2  -6  -6 1993.33 95.3725  11
  -2  -6   6 2078.85 70.1199  11
   2  -6  -6 1939.36 98.1771  13
   2  -6  -6 2256.22 105.639   9
  -2  -6   6 2264.52 79.7094   9
   2   6  -5 15220.9 390.681   6
  -2  -6   5 15506.8 399.627   6
  -2   6   5 15364.2 400.888   7
   2   6  -5 15558.4 373.430   5
  -2  -6   5 15815.2 385.727   7
  -2   6   5 15539.6 398.626   4
  -2  -6   5 14990.1 395.479   2
   2  -6  -5 15704.5 392.150   2
   2   6  -5 15414.3 402.064   4
  -2  -6   5 14866.5 367.800  11
  -2  -6   5 15216.3 400.636  13
  -2  -6   5 15427.0 383.737  12
   2  -6  -5 15707.0 405.541  13
   2  -6  -5 14535.5 395.216  11
   2  -6  -5 15383.2 402.255   9
  -2  -6   5 15813.7 378.732   9
   2  -6  -4 59.9427 46.4833   7
   2   6  -4 55.8304 44.4412   6
  -2   6   4 113.539 44.2300   7
   2   6  -4 82.9703 34.7554   5
  -2  -6   4 86.7668 40.8775   7
  -2  -6   4 92.1329 47.0074   6
  -2  -6   4 68.6593 43.1168   2
   2  -6  -4 124.104 41.8771   2
   2   6  -4 134.622 45.6423   4
  -2   6   4 50.5427 43.1294   4
   2  -6  -4 86.7586 44.6445  11
  -2   6   4 96.2290 43.6569  11
  -2  -6   4 78.0629 38.5397  12
   2  -6  -4 107.448 47.9476  13
  -2  -6   4 78.6681 48.4016  13
   2   6  -4 60.9967 33.7938  12
  -2  -6   4 81.3576 26.6257  11
  -2  -6   4 92.2042 36.6522   9
   2  -6  -4 155.514 50.5590   9
   2   6  -3 2546.41 100.589   6
  -2  -6   3 2258.62 91.8279   7
  -2   6   3 2481.87 101.038   7
   2  -6  -3 2369.87 102.859   7
  -2   6   3 2258.52 99.8017   4
  -2   6   3 2439.27 94.7289  11
  -2   6   3 2311.50 105.530  13
   2  -6  -3 2351.32 96.2622  11
  -2  -6   3 2270.35 104.757  13
   2  -6  -3 2527.72 106.141  13
  -2  -6   3 2320.24 78.0965  11
   2   6  -3 2253.44 87.1316  12
  -2  -6   3 2217.50 73.2855   8
  -2  -6   3 2491.26 89.0576   9
   2  -6  -3 2403.44 101.384   9
  -2  -6   2 660.870 53.0278   7
   2  -6  -2 668.269 60.2166   7
   2   6  -2 595.506 58.9436   6
  -2  -6   2 708.173 60.3331   4
  -2   6   2 669.479 58.5456   4
   2   6  -2 699.733 50.9112  12
  -2   6   2 704.972 53.3432  11
  -2  -6   2 585.581 60.8472  13
   2  -6  -2 597.508 54.5609  11
  -2   6   2 688.454 63.6791  13
   2   6  -2 639.441 40.6609  11
  -2  -6   2 632.396 41.1440  11
   2  -6  -2 564.880 23.1047   8
  -2  -6   2 652.160 32.7689   8
  -2  -6   2 745.941 53.9606   9
  -2  -6   1 45.8883 42.4348   7
   2   6  -1 49.4557 41.0259   7
   2  -6  -1 20.9570 44.7704   7
   2  -6  -1 28.4253 40.9427   2
  -2  -6   1 3.51278 42.0151   4
   2   6  -1-15.3549 42.5849   4
  -2   6   1-3.67555 42.7946   4
  -2  -6   1-14.0804 31.0331  11
  -2   6   1 10.4482 36.6998  11
   2   6  -1 34.1299 30.4568  11
  -2   6   1 4.41035 42.5503  13
   2   6  -1 42.1688 35.8392  12
   2  -6  -1-5.74830 37.1892  11
  -2  -6   1 62.1107 49.3084  13
  -2  -6   1 3.29706 14.9455   8
   2  -6  -1 28.3050 16.2605   8
  -2  -6   1-30.3666 36.5761   9
  -2  -6   0 13837.2 358.173   7
   2  -6   0 13979.1 362.613   7
  -2   6   0 13802.7 359.429   6
  -2   6   0 13983.5 357.604   5
   2   6   0 13899.0 359.303   7
   2   6   0 13856.7 367.020   4
   2  -6   0 14054.8 358.283   2
  -2  -6   0 13374.9 361.359   4
  -2   6   0 13974.1 365.346   4
   2   6   0 13474.3 352.368  12
  -2  -6   0 13796.3 371.247  13
  -2   6   0 13792.0 337.079  12
  -2  -6   0 14162.4 346.009  11
   2  -6   0 13832.3 352.120  11
   2  -6   0 13746.9 365.976  13
  -2   6   0 14094.9 374.452  13
  -2  -6   0 14013.6 355.802   9
   2  -6   1 2965.47 114.904   7
   2   6   1 2704.11 116.619   6
  -2   6  -1 3287.86 114.057   6
  -2   6  -1 2994.02 110.301   5
   2   6   1 3032.40 116.349   7
   2   6   1 2974.46 118.519   4
   2  -6   1 3113.61 112.332   2
  -2   6  -1 3099.20 91.4020  12
   2  -6   1 3091.56 107.312  11
   2  -6   1 3205.03 121.720  13
   2   6   1 3136.42 112.227  12
  -2   6  -1 3219.74 126.980  13
  -2  -6  -1 3206.18 125.764  13
  -2  -6  -1 3037.28 115.788   7
  -2  -6  -1 3123.86 113.971   9
  -2   6  -2 3573.47 114.636   5
   2  -6   2 3299.92 120.037   7
  -2   6  -2 3368.95 115.004   6
   2   6   2 3357.70 126.112   6
   2  -6   2 3308.68 116.996   2
   2   6   2 3255.67 123.913   4
   2   6   2 3265.89 111.261  11
   2   6   2 3099.79 117.588  12
   2  -6   2 3241.33 110.001  11
  -2   6  -2 3048.61 91.1142  12
   2  -6   2 3323.23 124.584  13
  -2  -6  -2 3203.76 118.387   9
  -2  -6  -2 3320.94 122.307   7
   2   6   3 1179.11 79.1582   6
  -2   6  -3 1228.38 64.9045   6
  -2   6  -3 1164.54 62.2788   5
   2  -6   3 1141.22 70.7109   7
   2   6   3 1104.65 74.6397   4
   2  -6   3 1147.73 68.7250   2
  -2   6  -3 1210.78 73.4321   4
  -2  -6  -3 1041.13 68.6362   2
   2   6   3 1196.17 68.4695  11
   2  -6   3 1337.01 76.3878  13
   2  -6   3 1183.26 63.3713  11
  -2  -6  -3 1149.17 72.3522   9
  -2  -6  -3 1216.25 74.9138   7
   2   6   4 368.490 63.3299   6
  -2   6  -4 358.286 45.1000   6
  -2   6  -4 357.541 45.4332   5
   2  -6   4 464.976 54.9580   7
  -2  -6  -4 387.192 55.0650   7
   2  -6   4 367.786 50.0310   2
  -2   6  -4 388.647 53.4684   4
   2   6   4 436.991 56.5835   4
  -2  -6  -4 381.366 51.2833   2
   2  -6   4 315.891 43.5616  11
  -2   6  -4 396.669 56.4188  13
   2   6   4 381.802 52.1694  11
  -2  -6  -4 299.412 58.5584  13
   2  -6   4 395.856 53.7932  13
  -2  -6  -4 448.795 58.6323   9
   2  -6   4 381.494 44.2097   9
   2  -6   5 1045.84 69.0184   7
   2   6   5 970.822 76.6460   6
  -2   6  -5 938.802 56.1080   6
   2   6   5 1020.11 74.7734   7
  -2   6  -5 1000.54 58.5108   5
   2  -6   5 923.490 60.9912   2
  -2   6  -5 973.508 67.6093   4
   2   6   5 1062.95 71.7655   4
  -2  -6  -5 1018.74 66.9365   2
   2  -6   5 965.010 58.8417  11
   2   6   5 961.702 69.9148  11
   2  -6   5 1191.69 72.5363  13
  -2  -6  -5 1151.20 78.6217  13
  -2   6  -5 996.035 76.3939  13
   2  -6   5 1105.86 59.9668   9
  -2  -6  -5 944.640 74.1136   9
  -2  -6  -5 963.645 70.1950   7
  -2   6  -6 766.836 51.6602   6
  -2   6  -6 716.275 54.3514   5
   2  -6   6 629.517 63.8512   7
   2   6   6 588.893 70.2207   7
  -2  -6  -6 691.421 61.0094   2
   2  -6   6 732.770 59.0147   2
  -2   6  -6 648.406 62.5129   4
   2   6   6 747.708 66.8732   4
   2   6   6 597.732 64.0910  11
  -2  -6  -6 675.732 72.2469  13
   2  -6   6 756.727 37.7154  12
  -2   6  -6 749.827 70.9783  13
   2  -6   6 764.436 55.8878  11
   2  -6   6 781.860 65.0283  13
  -2  -6  -6 918.838 72.1619   7
  -2  -6  -6 654.256 70.2013   9
   2  -6   6 797.560 53.9702   9
  -2   6  -7 126.645 41.6296   5
   2   6   7 139.540 59.9196   7
  -2   6  -7 83.6488 48.7498   4
   2   6   7 163.813 54.2160   4
  -2  -6  -7 200.924 49.0344   2
   2  -6   7 144.845 45.9090   2
   2   6   7 107.718 54.4737  11
  -2  -6  -7 239.874 64.5639  13
   2  -6   7 125.780 28.3287  12
  -2   6  -7 91.6863 58.2946  13
  -2  -6  -7 100.609 60.8065   9
  -2  -6  -7 98.4091 40.6042  10
   2  -6   7 153.308 43.1430   9
  -2   6  -8 328.220 45.1163   5
   2   6   8 285.572 67.2679   7
   2   6   8 175.668 65.3845   5
   2   6   8 185.916 52.7165   4
   2  -6   8 278.462 47.7525   2
  -2   6  -8 246.170 51.7174   4
  -2  -6  -8 231.913 50.2745   2
   2   6   8 310.880 62.2785  11
   2  -6   8 227.885 33.6577  12
  -2  -6  -8 272.088 63.6090  13
  -2   6  -8 181.291 58.6213  13
   2   6   8 242.872 63.7428   9
   2  -6   8 277.482 44.8496   9
  -2  -6  -8 245.836 43.8301  10
  -2  -6  -8 281.170 67.3221   9
   2   6   9 1544.28 100.101   5
   2   6   9 1571.14 105.127   7
  -2   6  -9 1579.10 74.2854   5
  -2   6  -9 1520.44 81.0021   4
   2   6   9 1509.74 85.0103   4
   2  -6   9 1562.76 75.0338   1
  -2  -6  -9 1565.97 79.5799   2
  -2  -6  -9 1750.09 72.0390  10
   2  -6   9 1572.84 63.7579  12
  -2  -6  -9 1719.61 102.356  13
  -2   6  -9 1611.56 102.665  13
   2   6   9 1532.63 95.1404  11
   2   6   9 1648.77 103.038   9
   2  -6   9 1728.37 76.3606   9
   2   6  10 72.5389 70.5899   7
  -2   6 -10 100.839 46.2423   5
   2  -6  10 51.8504 52.0376   5
  -2   6 -10 183.918 52.0519   4
  -2  -6 -10 13.5206 43.2482   2
   2   6  10 64.9511 69.9733   5
   2  -6  10 46.7859 45.3750   1
  -2   6 -10 30.0176 62.5378  13
   2  -6  10 76.9863 37.7078  12
  -2  -6 -10 73.1229 65.5161  13
   2   6  10 19.3032 67.6029   9
   2  -6  10 75.7173 45.8326   9
  -2  -6 -10 42.5790 43.9118  10
   2  -6  11 89.8200 51.4583   5
  -2   6 -11 65.3583 48.1596   5
   2   6  11 31.9521 70.2122   7
  -2   6 -11 161.475 50.2137   4
   2   6  11 42.7400 73.6791   5
  -2  -6 -11 74.8213 45.6477   2
   2  -6  11 92.0630 45.1638   1
  -2  -6 -11 58.8303 63.9427  13
   2  -6  11 92.4038 39.8302  12
  -2   6 -11 80.4406 65.4507  13
  -2  -6 -11 169.152 48.8578  10
   2  -6  11 147.302 49.6712   9
   2   6  11 94.3675 72.4164   9
  -2   6 -12 164.734 49.8207   5
   2  -6  12 96.2236 53.1418   5
   2   6  12 16.3552 75.6452   7
  -2   6 -12 86.2150 48.8077   4
  -2  -6 -12 36.0509 42.6735   2
   2  -6  12 77.0368 42.9424   1
   2  -6  12 114.594 43.9458  12
  -2   6 -12 5.02026 66.8955  13
  -2  -6 -12 88.3089 68.8476  13
  -2  -6 -12 80.3609 49.6421  10
   2  -6  12 122.608 54.0186   9
  -2  -6 -12 115.761 72.6586   9
   2   6  13 455.132 86.7905   7
   2  -6  13 328.404 61.0812   5
  -2   6 -13 408.657 58.3902   5
  -2  -6 -13 356.025 45.7993   1
   2  -6  13 472.700 46.2010   1
  -2  -6 -13 386.337 46.7706   2
  -2   6 -13 501.907 56.0819   4
  -2   6 -13 354.348 77.6455  13
  -2  -6 -13 395.723 76.4212  13
  -2  -6 -13 362.830 58.2043  10
  -2  -6 -13 412.209 87.8168   9
   2  -6  13 472.427 63.1867   9
   2   6  14 152.119 84.4128   7
  -2   6 -14 205.370 48.8056   4
  -2  -6 -14 71.4214 39.8262   1
  -2  -6 -14 46.0516 41.6131   1
  -2   6 -14 160.761 56.7629   5
  -2   6 -14 132.725 73.5600  13
  -2  -6 -14 154.791 72.4873  13
  -2  -6 -14 143.284 55.1995  10
  -2  -6 -14 114.525 83.3410   9
  -2  -7  14 369.142 74.9844   6
  -2   7  14 359.071 86.5675   7
  -2   7  14 362.109 62.7875   4
   2  -7 -14 425.931 54.9569   1
  -2  -7  14 409.093 55.5405   2
  -2  -7  14 393.007 71.9944  12
   2  -7 -14 482.654 74.7132  13
   2  -7 -14 492.980 92.8430   9
  -2   7  14 372.968 54.8990   8
   2  -7 -14 666.233 75.6865  10
  -2  -7  13 870.162 80.5826   6
  -2   7  13 704.744 92.7384   7
  -2  -7  13 688.751 65.5079   2
  -2   7  13 764.188 71.2947   4
   2  -7 -13 613.698 60.1079   1
   2  -7 -13 825.230 75.9928  10
   2   7 -13 887.948 80.0614  13
  -2  -7  13 676.986 73.4891  12
  -2  -7  13 705.506 47.4520  11
   2  -7 -13 713.358 77.8909  13
  -2   7  13 769.857 56.9925   8
   2  -7 -13 769.832 98.2213   9
  -2  -7  12 74.0353 64.8646   6
  -2  -7  12 54.2130 47.2428   7
  -2   7  12 10.2685 73.1649   7
   2   7 -12 49.7030 28.6838   5
  -2  -7  12 61.5834 54.4315   2
  -2   7  12 105.854 58.1765   4
   2  -7 -12 82.3205 51.6645   1
   2   7 -12 52.5198 61.6969  13
  -2  -7  12 54.7148 35.7015  11
  -2  -7  12 55.4468 56.4313  12
   2  -7 -12-34.9306 61.4545  13
   2  -7 -12 178.929 81.6233   9
  -2  -7  12 58.7871 32.5912   9
  -2  -7  12 26.3825 31.0738   9
   2  -7 -12 126.572 60.0510  10
  -2   7  12 16.9870 38.4590   8
   2  -7 -12 114.417 71.2611   7
   2   7 -11 3250.43 95.2376   5
  -2   7  11 3608.51 151.235   7
  -2  -7  11 3348.85 138.247   6
  -2  -7  11 3530.78 118.392   7
   2   7 -11 3344.63 133.101   4
  -2  -7  11 3490.15 127.949   2
   2  -7 -11 3477.83 120.455   1
  -2   7  11 3573.45 132.114   4
   2   7 -11 3394.16 139.569  13
  -2  -7  11 3632.64 127.207  12
  -2   7  11 3837.31 149.002  11
   2  -7 -11 3698.60 128.030  10
   2  -7 -11 3332.95 140.042  13
  -2  -7  11 3760.32 126.431  13
  -2  -7  11 3038.53 101.108  11
  -2  -7  11 3279.44 100.760   9
  -2  -7  11 3572.01 98.3264   9
   2  -7 -11 3727.69 153.782   9
   2  -7 -11 3465.00 145.928   7
  -2  -7  10 78.9457 63.8038   6
   2  -7 -10 54.2773 66.8230   7
   2   7 -10 121.044 31.7810   5
  -2  -7  10 103.267 46.8045   7
  -2   7  10 83.8436 67.7789   7
  -2   7  10 130.573 57.2960   4
  -2  -7  10 34.1640 54.8550   2
   2  -7 -10 187.637 50.9238   2
   2   7 -10 89.1340 56.8786   4
  -2  -7  10 90.7474 52.5092  13
   2  -7 -10 71.4133 60.5291  13
  -2  -7  10 98.7953 33.2223  11
  -2  -7  10 137.692 53.0553  12
   2   7 -10 136.769 60.9785  13
  -2  -7  10 93.7042 35.2520   9
  -2  -7  10 56.5960 33.3146   9
  -2   7  10 108.738 33.0938   8
   2  -7 -10 139.744 58.7084  10
   2   7  -9 557.698 38.1437   5
  -2  -7   9 495.254 69.9258   6
  -2   7   9 549.638 75.9150   7
  -2  -7   9 545.914 55.4949   7
   2  -7  -9 579.073 75.0098   7
   2   7  -9 429.153 67.6397   4
  -2  -7   9 504.962 63.8642   2
  -2   7   9 378.167 60.6998   4
   2  -7  -9 523.508 59.1716   2
   2   7  -9 485.405 69.4849  13
  -2  -7   9 532.368 39.2018  11
  -2  -7   9 491.947 56.3797  12
   2  -7  -9 404.760 68.6683  13
  -2  -7   9 501.410 60.9152  13
   2  -7  -9 493.107 62.9336  10
  -2   7   9 481.632 34.1028   8
  -2  -7   9 484.233 46.0649   9
  -2  -7   9 519.572 39.8524   9
  -2   7   8 2857.09 129.235   7
   2   7  -8 2994.01 90.0634   5
  -2  -7   8 2960.78 107.946   7
  -2  -7   8 2912.55 124.491   6
   2  -7  -8 3011.84 113.576   2
   2   7  -8 2770.72 124.403   4
  -2   7   8 2717.42 117.500   4
  -2  -7   8 2970.30 119.381   2
  -2  -7   8 2979.53 89.9146  11
   2   7  -8 2776.85 126.599  13
  -2  -7   8 2970.87 121.292  13
  -2  -7   8 2730.09 106.923  12
   2  -7  -8 2932.33 127.807  13
   2  -7  -8 3088.01 130.329   7
  -2  -7   8 2911.83 90.2675   9
  -2  -7   8 2685.24 97.3450   9
  -2   7   7 410.360 66.9364   7
   2   7  -7 360.984 39.9905   5
  -2  -7   7 463.219 53.0931   7
  -2  -7   7 445.451 67.0622   6
  -2   7   7 343.832 60.5444   4
  -2  -7   7 377.914 61.2275   2
   2  -7  -7 457.362 57.7026   2
   2   7  -7 363.451 67.6884   4
  -2  -7   7 457.106 64.1745  13
  -2  -7   7 420.385 37.8323  11
   2  -7  -7 412.994 65.2015  11
   2  -7  -7 505.123 68.9993  13
  -2   7   7 416.203 65.5710  11
  -2  -7   7 407.137 53.4678  12
  -2  -7   7 450.599 47.4227   9
  -2  -7   7 479.455 41.7697   9
   2  -7  -7 414.886 71.5690   9
  -2   7   6-35.2902 52.8762   7
  -2  -7   6 50.6791 43.7649   7
  -2  -7   6 62.2883 55.5047   6
   2   7  -6 52.2117 49.8122   6
  -2  -7   6-3.85963 54.1418   2
  -2   7   6-8.14848 51.2200   4
   2  -7  -6-33.9782 50.4569   2
   2   7  -6 30.5288 55.1523   4
  -2   7   6 3.74640 52.7201  11
  -2  -7   6-4.89465 29.0944  11
   2  -7  -6 7.97293 51.7729  11
   2  -7  -6 50.2079 51.6522  13
  -2  -7   6 35.8584 44.7325  12
  -2  -7   6 33.0464 54.2401  13
  -2  -7   6 14.1048 39.4586   9
   2  -7  -6-8.92605 60.2769   9
   2   7  -5 1492.53 81.8046   6
   2  -7  -5 1256.34 91.5309   7
  -2   7   5 1524.47 90.2142   7
  -2  -7   5 1616.69 78.3941   7
   2  -7  -5 1435.37 82.7809   2
  -2  -7   5 1363.23 84.9952   2
  -2   7   5 1510.64 86.8427   4
   2   7  -5 1405.24 91.1508   4
  -2  -7   5 1579.64 61.6200  11
  -2   7   5 1458.10 83.1197  11
   2  -7  -5 1612.64 92.8757  13
  -2  -7   5 1253.44 72.0453  12
   2  -7  -5 1438.90 84.8452  11
  -2  -7   5 1437.36 86.4594  13
  -2  -7   5 1486.18 71.5251   9
   2  -7  -5 1477.57 92.6973   9
   2  -7  -4 9111.88 255.071   7
  -2  -7   4 8729.23 239.745   7
   2   7  -4 8357.36 243.876   6
  -2   7   4 8766.08 250.356   7
   2   7  -4 8044.03 252.447   4
  -2   7   4 8122.15 248.721   4
   2  -7  -4 8671.29 244.807   2
  -2  -7   4 8395.79 248.799   2
  -2   7   4 8587.08 242.256  11
  -2  -7   4 8830.34 255.774  13
   2   7  -4 8197.43 227.616  12
   2  -7  -4 8513.48 254.701  13
  -2  -7   4 8528.59 220.317  11
   2  -7  -4 8571.27 245.453  11
  -2  -7   4 8470.89 216.368   8
  -2  -7   4 8639.93 232.184   9
   2  -7  -4 8660.13 253.146   9
   2  -7  -3 390.305 60.8539   7
   2   7  -3 319.047 60.1760   6
  -2   7   3 466.769 61.0071   7
  -2  -7   3 377.832 54.1976   7
  -2   7   3 427.866 61.8400   4
  -2  -7   3 427.449 59.7439   2
   2  -7  -3 389.078 54.4759  11
  -2  -7   3 419.211 61.9750  13
  -2   7   3 404.893 55.8047  11
  -2  -7   3 406.143 40.2962  11
   2  -7  -3 338.180 59.8023  13
  -2   7   3 444.065 65.7379  13
   2   7  -3 372.588 48.7528  12
  -2  -7   3 292.544 47.6240   9
  -2  -7   3 372.669 32.9377   8
   2  -7  -3 424.059 62.8481   9
   2   7  -2 1187.90 82.6055   6
   2  -7  -2 1330.10 81.3299   7
  -2  -7   2 1230.41 74.8278   7
   2   7  -2 1280.96 75.6443   7
  -2  -7   2 1235.38 79.3309   2
  -2   7   2 1267.37 80.1781   4
   2   7  -2 1011.22 64.8944  12
  -2   7   2 1342.66 73.3365  11
   2  -7  -2 1218.46 73.5578  11
  -2   7   2 1351.01 85.3065  13
  -2  -7   2 1315.58 87.1216  13
  -2  -7   2 1174.28 59.4082  11
  -2  -7   2 1176.74 43.0329   8
  -2  -7   2 1241.95 72.2579   9
  -2   7   1 157.607 56.1840   6
  -2  -7   1 245.185 52.5910   7
   2   7  -1 125.904 48.1867   7
   2  -7  -1 173.761 56.9990   7
  -2  -7   1 194.918 55.3975   2
   2   7  -1 180.048 58.8201   4
  -2   7   1 279.589 57.0454   4
   2  -7  -1 175.569 54.3848   2
  -2  -7   1 170.070 39.6980  11
  -2   7   1 167.198 37.9276  12
   2  -7  -1 177.425 48.6594  11
  -2  -7   1 168.277 55.9145  13
  -2   7   1 227.321 55.4537  13
  -2   7   1 200.813 47.5172  11
   2   7  -1 183.173 45.7725  12
  -2  -7   1 150.693 45.9823   9
   2  -7  -1 142.962 17.3736   8
   2  -7   0 1127.97 77.3937   7
  -2   7   0 1111.97 74.1560   5
  -2   7   0 1104.62 77.7926   6
   2   7   0 1086.40 75.0747   7
   2  -7   0 1036.08 73.1298   2
  -2  -7   0 1038.12 77.0735   2
   2   7   0 1093.56 78.7247   4
  -2   7   0 1048.76 78.6744   4
  -2   7   0 1087.48 55.2622  12
   2  -7   0 1154.10 81.1859  13
  -2   7   0 994.217 81.5139  13
  -2  -7   0 1072.28 83.6785  13
  -2  -7   0 1087.44 63.8410  11
   2   7   0 1095.50 69.3513  12
   2  -7   0 1062.17 68.5189  11
  -2  -7   0 1196.48 76.6105   7
  -2  -7   0 1113.47 72.6860   9
  -2  -7  -1 398.377 60.0779   7
   2   7   1 420.361 63.9832   7
   2  -7   1 452.273 60.6420   7
  -2   7  -1 409.908 57.9688   5
  -2   7  -1 546.497 60.9371   6
   2  -7   1 440.967 56.4914   2
   2   7   1 458.030 63.2554   4
  -2   7  -1 416.112 64.6091  13
   2   7   1 420.444 54.7579  12
  -2   7  -1 433.170 38.5524  12
  -2  -7  -1 604.688 70.6684  13
   2  -7   1 485.044 62.5465  13
   2  -7   1 408.705 53.4366  11
   2   7   1 538.829 52.3775  11
  -2  -7  -1 359.678 57.3330   9
  -2   7  -2 64.3310 48.6965   5
  -2  -7  -2 77.0058 52.6495   7
   2   7   2 64.2458 56.4689   6
  -2   7  -2 75.9089 49.1097   6
   2  -7   2 68.9135 51.0236   7
   2   7   2 132.273 54.8896   7
  -2  -7  -2-7.89226 51.3728   2
   2   7   2 86.6450 56.6014   4
   2  -7   2 123.068 50.4385   2
   2   7   2 88.2932 49.1777  12
   2  -7   2 46.5460 50.7500  13
  -2   7  -2 90.7461 28.6687  12
   2  -7   2 64.7482 42.2280  11
   2   7   2 86.3824 41.8762  11
  -2  -7  -2 93.3373 51.0542   9
  -2   7  -3 40.9475 46.3128   6
   2   7   3 53.1544 56.6722   6
  -2   7  -3 25.7082 45.4960   5
   2  -7   3 45.5007 53.6139   7
  -2  -7  -3 43.5826 52.2168   7
   2   7   3 64.5815 53.0501   4
  -2  -7  -3 23.5294 51.1226   2
  -2   7  -3 21.1262 49.1986   4
   2  -7   3 27.9412 47.7383   2
   2  -7   3 4.14853 51.1172  13
   2   7   3 77.5738 45.7557  11
   2  -7   3-11.5503 42.6417  11
   2   7   3 26.2899 51.0747  12
  -2  -7  -3 31.2940 53.2862   9
  -2   7  -4 1821.34 86.0197   6
   2   7   4 1876.02 103.938   6
  -2   7  -4 1719.14 79.7776   5
   2  -7   4 1874.26 94.2498   7
   2  -7   4 1830.61 89.5462   2
  -2   7  -4 2003.41 100.520   4
   2   7   4 1757.86 97.6540   4
  -2  -7  -4 1810.78 95.4156   2
   2   7   4 1897.04 90.8717  11
   2  -7   4 1906.03 83.6384  11
   2  -7   4 1928.50 97.4777  13
  -2  -7  -4 1912.93 105.637  13
  -2   7  -4 1821.30 103.179  13
  -2  -7  -4 1724.51 98.6016   9
  -2  -7  -4 1810.70 96.6289   7
   2  -7   4 1869.97 82.3217   9
  -2   7  -5 1089.27 68.1136   6
  -2   7  -5 1080.40 65.8117   5
   2  -7   5 1097.55 77.8014   7
   2   7   5 1320.99 90.0816   6
   2  -7   5 1003.85 70.8973   2
   2   7   5 1089.15 83.3694   4
  -2   7  -5 951.887 75.0779   4
  -2  -7  -5 1090.10 76.9359   2
   2   7   5 1089.86 75.3972  11
  -2  -7  -5 1263.61 92.0338  13
   2  -7   5 1066.40 76.4326  13
  -2   7  -5 999.098 84.6438  13
   2  -7   5 1039.23 65.4204  11
  -2  -7  -5 1318.96 86.2401   9
  -2  -7  -5 1201.21 83.9032   7
   2  -7   5 1147.94 68.1644   9
   2  -7   6 2580.69 113.437   7
   2   7   6 2689.32 130.088   6
  -2   7  -6 2854.23 101.394   5
   2   7   6 2574.88 124.219   7
  -2   7  -6 2697.00 100.520   6
   2  -7   6 2721.52 109.731   2
  -2   7  -6 2636.43 116.955   4
   2   7   6 2763.55 118.651   4
  -2  -7  -6 2482.30 111.544   2
   2  -7   6 2818.25 115.955  13
  -2  -7  -6 2620.46 127.973  13
   2   7   6 2975.58 118.926  11
  -2   7  -6 2553.19 128.495  13
   2  -7   6 2655.24 102.109  11
   2  -7   6 2803.04 99.4784   9
  -2  -7  -6 2822.32 122.377   7
  -2  -7  -6 2279.68 118.728   9
  -2   7  -7 42.3601 44.2196   5
   2   7   7-24.5441 70.6972   6
   2   7   7 25.2338 62.1843   7
   2  -7   7 25.6740 55.0841   7
  -2   7  -7 67.3500 56.7152   4
  -2  -7  -7-10.7519 51.3082   2
   2  -7   7 44.6314 48.1451   2
   2   7   7 49.9474 56.7955   4
   2  -7   7-20.0221 43.1983  11
  -2   7  -7 107.359 67.3545  13
  -2  -7  -7 36.1570 59.3070  13
   2   7   7 104.961 61.4620  11
   2  -7   7 91.5074 51.5146  13
   2  -7   7 47.5252 45.7812   9
  -2  -7  -7 91.0315 65.3553   9
   2   7   7 33.2520 16.2665   8
   2  -7   8 1066.40 78.4776   7
  -2   7  -8 1160.24 63.9197   5
   2   7   8 1059.28 91.9902   7
  -2   7  -8 920.653 74.1193   4
   2  -7   8 1028.75 69.4639   2
  -2  -7  -8 935.736 72.9793   2
   2   7   8 1000.95 79.3919   4
   2  -7   8 880.204 64.4103  11
   2  -7   8 1004.31 47.3893  12
   2   7   8 945.348 81.1816  11
  -2   7  -8 909.305 88.9653  13
  -2  -7  -8 1038.98 63.2898  10
  -2  -7  -8 964.309 86.4730  13
  -2  -7  -8 1157.06 92.1220   9
   2  -7   8 1100.00 65.5299   9
   2   7   8 842.585 39.6576   8
   2  -7   9 167.563 58.8987   7
  -2   7  -9 141.444 46.6677   5
   2   7   9 182.917 74.4657   7
  -2  -7  -9 193.236 57.7016   2
   2   7   9 154.919 62.4980   4
   2   7   9 114.099 74.6685   5
   2  -7   9 181.801 52.5280   2
  -2   7  -9 139.988 56.7693   4
  -2  -7  -9 204.676 69.3743  13
  -2   7  -9 157.571 69.6020  13
   2   7   9 125.141 65.7072  11
   2  -7   9 121.591 34.5916  12
  -2  -7  -9 96.2109 71.4214   9
  -2  -7  -9 152.299 47.4518  10
   2  -7   9 254.371 51.7860   9
   2   7  10 5.52859 72.7277   7
  -2   7 -10 78.3264 49.8023   5
   2  -7  10 79.8275 58.2152   7
  -2   7 -10 29.6448 56.4164   4
  -2  -7 -10-15.4762 53.4339   2
   2  -7  10 34.7504 52.4993   1
   2   7  10-3.81332 57.8209   4
   2   7  10-39.3249 75.0371   5
  -2   7 -10 16.3561 66.6206  13
   2  -7  10 9.62907 35.4545  12
  -2  -7 -10 94.8589 71.7844  13
   2   7  10-32.7400 65.4038  11
   2  -7  10 29.1629 51.1494   9
  -2  -7 -10 133.195 51.1408  10
  -2   7 -11 1413.83 75.9041   5
   2  -7  11 1499.92 92.5463   7
   2   7  11 1572.81 113.868   7
  -2  -7 -11 1579.05 82.2978   2
   2  -7  11 1442.88 77.8936   1
  -2   7 -11 1632.61 89.0712   4
   2  -7  11 1468.32 65.5189  12
  -2   7 -11 1573.96 107.889  13
  -2  -7 -11 1613.81 107.307  13
  -2  -7 -11 1676.06 77.2247  10
   2  -7  11 1749.99 81.0609   9
   2  -7  12 932.969 80.9713   7
  -2   7 -12 888.981 66.2775   5
   2   7  12 980.137 101.082   7
   2  -7  12 986.213 65.7757   1
  -2  -7 -12 914.883 66.7417   2
  -2   7 -12 978.854 75.6613   4
  -2   7 -12 983.554 96.7970  13
  -2  -7 -12 1005.81 68.1745  10
  -2  -7 -12 1031.33 97.2384  13
   2  -7  12 1027.63 69.5782   9
  -2  -7 -12 999.247 101.418   9
   2   8 -12 422.518 35.2374   5
  -2   8  12 291.248 83.4591   7
  -2  -8  12 325.396 76.6231   6
  -2   8  12 391.569 69.8442   4
  -2  -8  12 361.412 65.5333   2
   2  -8 -12 386.366 66.0233   1
  -2  -8  12 289.985 63.3308  12
   2  -8 -12 341.220 77.7748  13
   2  -8 -12 256.891 87.3960   9
  -2   8  12 293.243 37.7267   8
   2  -8 -12 316.222 67.3510  10
   2   8 -11 556.637 39.6905   5
  -2  -8  11 507.162 78.5970   6
  -2  -8  11 560.085 62.4846   7
  -2   8  11 557.863 85.7766   7
  -2  -8  11 489.842 70.9757   2
   2  -8 -11 442.824 66.6926   1
   2   8 -11 420.577 74.6221   4
  -2   8  11 545.818 72.2090   4
  -2  -8  11 434.889 41.1874  11
  -2  -8  11 601.840 65.8146  13
   2  -8 -11 497.368 76.8897  13
  -2  -8  11 471.722 64.3528  12
   2  -8 -11 512.660 97.3127   9
  -2  -8  11 482.158 46.0418   9
   2  -8 -11 464.033 68.6655  10
  -2   8  11 410.696 34.4984   8
   2   8 -10 122.909 34.0239   5
  -2  -8  10 152.023 53.8186   7
  -2   8  10 159.366 77.7883   7
  -2  -8  10 89.7493 68.6241   6
   2   8 -10 68.1739 65.9780   4
  -2  -8  10-3.79449 62.8018   2
   2  -8 -10 125.045 56.6049   2
  -2   8  10 21.2079 63.6434   4
  -2  -8  10 87.9350 58.2431  13
  -2  -8  10 56.2341 35.7830  11
   2  -8 -10 83.8865 67.2466  13
  -2  -8  10 153.652 54.8390  12
  -2  -8  10 118.429 42.8322   9
   2  -8 -10 62.1987 59.7934  10
  -2  -8  10 103.669 38.2065   9
  -2   8   9 72.8726 72.3206   7
  -2  -8   9 43.2757 54.1953   7
  -2  -8   9 27.0397 64.9040   6
   2  -8  -9-19.5620 68.8229   7
  -2  -8   9-94.0459 64.6732   2
   2   8  -9 69.9344 62.3213   4
   2  -8  -9 65.2147 53.9206   2
  -2   8   9-25.8357 58.9506   4
  -2  -8   9 8.13234 60.0420  13
  -2   8   9-22.5618 64.1992  11
  -2  -8   9 15.0742 54.8611  12
  -2  -8   9 37.1335 34.7429  11
   2  -8  -9 19.9271 68.4286  13
  -2  -8   9 72.6168 38.1173   9
  -2  -8   9 91.0229 43.1174   9
  -2   8   8 81.0842 68.6791   7
  -2  -8   8 31.9617 51.6488   7
   2  -8  -8 29.0873 69.0762   7
   2  -8  -8 89.1925 56.8885   2
  -2  -8   8 4.05171 58.8755   2
   2   8  -8 42.8453 62.0557   4
  -2   8   8 21.2266 56.2474   4
  -2  -8   8-72.8740 65.3477  13
  -2  -8   8 18.4446 33.4511  11
  -2  -8   8 17.7611 49.1897  12
   2  -8  -8 34.5944 66.6330  13
  -2   8   8-13.0420 59.2158  11
  -2  -8   8-22.3305 38.2820   9
   2  -8  -8 107.376 71.3836   9
  -2  -8   8 37.2628 43.2488   9
   2   8  -7 1406.43 86.7179   6
  -2  -8   7 1408.14 81.2121   7
  -2   8   7 1262.97 96.2194   7
  -2  -8   7 1382.18 89.0878   2
  -2   8   7 1186.92 86.7923   4
   2  -8  -7 1245.65 83.0936   2
   2   8  -7 1343.26 96.4341   4
  -2   8   7 1168.95 85.5079  11
  -2  -8   7 1210.07 73.7947  12
   2  -8  -7 1368.81 92.3566  11
   2  -8  -7 1194.94 93.3905  13
  -2  -8   7 1243.91 58.4549  11
  -2  -8   7 1316.15 93.8121  13
   2  -8  -7 1236.11 98.5410   9
  -2  -8   7 1372.31 72.3068   9
  -2  -8   7 1375.91 65.5626   9
  -2   8   6 724.940 79.9211   7
  -2  -8   6 715.838 66.9922   7
   2   8  -6 727.090 54.3303   5
   2   8  -6 750.468 71.2124   6
   2  -8  -6 779.403 74.0688   2
   2   8  -6 532.354 78.7040   4
  -2  -8   6 641.376 73.3236   2
  -2   8   6 809.947 79.6047   4
  -2   8   6 684.098 73.4016  11
   2  -8  -6 835.072 81.4837  13
   2  -8  -6 642.934 73.8895  11
  -2  -8   6 761.980 79.7257  13
  -2  -8   6 693.319 47.0057  11
   2  -8  -6 669.729 83.0612   9
  -2  -8   6 748.823 60.4814   9
  -2  -8   6 584.527 51.3622   8
  -2  -8   5 2906.17 117.547   7
   2  -8  -5 2998.45 133.398   7
   2   8  -5 2961.96 105.428   5
  -2   8   5 2867.73 129.035   7
   2   8  -5 2979.73 122.592   6
   2  -8  -5 2784.84 119.858   2
  -2  -8   5 2909.10 126.772   2
   2   8  -5 3094.45 134.208   4
  -2   8   5 2829.00 127.896   4
  -2   8   5 2615.26 118.906  11
  -2  -8   5 2854.78 97.8169  11
   2  -8  -5 3049.59 126.488  11
  -2  -8   5 3077.85 132.547  13
   2  -8  -5 3045.38 133.648  13
   2  -8  -5 3091.76 134.413   9
  -2  -8   5 2793.40 95.3318   8
  -2  -8   5 3035.75 110.594   9
  -2  -8   4 2486.57 111.384   7
   2   8  -4 2510.23 114.540   6
  -2   8   4 2811.40 123.180   7
   2   8  -4 2646.96 101.768   5
   2  -8  -4 2473.28 122.238   7
  -2  -8   4 2661.35 121.225   2
   2  -8  -4 2497.61 113.592   2
  -2   8   4 2533.45 120.608   4
   2   8  -4 2606.15 125.169   4
   2   8  -4 2614.27 99.1579  12
   2  -8  -4 2747.68 116.185  11
   2  -8  -4 2599.03 124.660  13
  -2   8   4 2649.52 111.646  11
  -2  -8   4 2632.90 91.4424  11
  -2  -8   4 2461.70 122.815  13
  -2  -8   4 2420.50 81.9478   8
  -2  -8   4 2577.59 105.336   9
   2  -8  -4 2453.55 120.396   9
   2  -8  -3 1555.03 97.2508   7
   2   8  -3 1669.15 94.1903   6
  -2  -8   3 1590.70 89.8743   7
  -2   8   3 1512.62 96.2413   4
   2  -8  -3 1408.59 90.7936   2
  -2  -8   3 1476.77 92.6031   2
  -2   8   3 1562.45 85.4198  11
   2   8  -3 1619.64 80.1380  12
  -2  -8   3 1677.88 101.972  13
   2  -8  -3 1517.60 95.7374  13
   2  -8  -3 1497.81 87.6092  11
  -2  -8   3 1597.24 71.1145  11
  -2  -8   3 1604.18 83.8328   9
   2  -8  -3 1686.77 100.894   9
  -2  -8   3 1499.16 54.6580   8
  -2   8   2 50.3721 64.8603   6
   2  -8  -2 160.495 62.3548   7
   2   8  -2 105.577 64.6508   6
   2   8  -2 153.898 56.6950   7
  -2  -8   2 49.5951 55.2884   7
  -2  -8   2-4.42442 58.2171   2
  -2   8   2 18.9812 58.7218   4
   2   8  -2 23.7150 47.2882  12
   2  -8  -2 66.8330 50.5933  11
  -2  -8   2 29.6035 40.3626  11
  -2   8   2 131.481 48.9005  11
  -2   8   2 81.6179 46.1897  12
  -2   8   2 28.2784 59.6545  13
  -2  -8   2 139.558 67.3900  13
  -2  -8   2 65.3188 52.8461   9
   2  -8  -2 87.5914 61.8396   9
  -2  -8   2 49.0729 19.1060   8
   2   8  -1 370.230 65.7351   6
  -2  -8   1 249.914 61.7630   7
  -2   8   1 273.170 62.7123   5
  -2   8   1 355.285 67.1449   6
   2   8  -1 389.082 62.2315   7
   2  -8  -1 311.408 64.4945   7
  -2  -8   1 283.161 62.3631   2
   2  -8  -1 389.803 65.5110   2
   2   8  -1 404.137 72.0441   4
  -2   8   1 367.386 67.3886   4
   2   8  -1 388.332 46.5789  11
  -2   8   1 495.152 77.2670  13
   2  -8  -1 263.123 56.6831  11
  -2   8   1 343.728 45.7913  12
  -2  -8   1 348.127 68.9213  13
  -2  -8   1 318.881 48.9769  11
   2   8  -1 399.940 56.2069  12
   2  -8  -1 422.409 66.7328   9
  -2  -8   1 325.629 59.9531   9
   2   8   0 126.979 57.7540   7
  -2   8   0 108.213 61.8257   6
   2  -8   0 164.471 59.9598   7
  -2  -8   0 44.1357 55.7685   7
  -2   8   0 61.1499 59.4457   5
  -2  -8   0 84.1079 62.1175   2
  -2   8   0 38.2306 58.2915   4
   2  -8   0 63.4148 54.9107   2
   2   8   0 24.5781 61.0812   4
  -2   8   0 95.3264 36.8702  12
   2   8   0 109.395 50.3561  12
   2  -8   0 71.6721 64.2205  13
   2   8   0 50.1517 41.9122  11
  -2   8   0 114.254 61.1010  13
   2  -8   0 41.2466 47.7048  11
  -2  -8   0 5.22941 56.9945  13
  -2  -8   0 52.1002 43.9749  11
   2  -8   0 78.1401 19.6386   8
  -2  -8   0 30.2985 54.4012   9
  -2   8  -1 74.5577 59.3819   6
  -2  -8  -1 74.4997 55.3723   7
   2   8   1 152.066 60.6044   7
  -2   8  -1 89.9635 54.3895   5
   2  -8   1 137.262 62.0967   7
   2   8   1 220.453 65.1798   4
   2  -8   1 94.7735 55.3565   2
   2  -8   1 75.8509 60.5790  13
   2   8   1 173.918 55.3798  12
   2   8   1 103.914 48.0224  11
  -2   8  -1 80.4268 36.2586  12
  -2   8  -1 103.374 65.1910  13
   2  -8   1 110.300 49.0545  11
  -2  -8  -1 73.9494 64.5842  13
  -2  -8  -1 79.1402 58.5580   9
  -2   8  -2 44.4328 54.5183   6
  -2  -8  -2 4.25240 57.9249   7
  -2   8  -2-13.4660 53.2855   5
   2   8   2 13.6172 60.2478   7
   2  -8   2 93.6777 61.4165   7
   2   8   2-14.6024 61.9157   4
  -2  -8  -2 8.80784 60.6912   2
   2  -8   2 47.1435 52.2388   2
   2   8   2 28.0454 48.0149  11
  -2   8  -2 59.7380 32.2636  12
   2  -8   2-29.1643 47.2297  11
   2   8   2 53.3014 56.5395  12
   2  -8   2 14.0886 61.5548  13
  -2  -8  -2 66.0236 57.3339   9
   2   8   3 2122.62 111.841   7
   2  -8   3 1971.68 105.894   7
  -2   8  -3 2124.06 100.206   6
  -2   8  -3 2166.14 95.8187   5
   2   8   3 1839.47 111.390   6
  -2  -8  -3 1928.47 104.115   2
   2  -8   3 1944.08 101.026   2
  -2   8  -3 2220.62 111.100   4
   2   8   3 2149.72 112.521   4
   2   8   3 2011.52 95.7634  11
   2  -8   3 2182.74 93.6143  11
   2   8   3 2109.02 105.904  12
   2  -8   3 2174.00 109.651  13
  -2  -8  -3 1999.49 107.951   9
  -2  -8  -3 2268.25 110.340   7
   2   8   4 1687.82 104.838   6
  -2   8  -4 1729.41 84.1780   5
   2  -8   4 1483.03 93.1053   7
  -2   8  -4 1558.76 86.0493   6
  -2   8  -4 1360.14 93.7273   4
  -2  -8  -4 1559.19 94.2770   2
   2   8   4 1610.88 98.8706   4
   2  -8   4 1465.02 89.1275   2
  -2   8  -4 1452.27 106.286  13
   2   8   4 1471.89 94.8769  12
   2  -8   4 1508.81 79.8650  11
   2   8   4 1595.47 89.3450  11
  -2  -8  -4 1401.99 101.928  13
   2  -8   4 1692.89 95.9868  13
  -2  -8  -4 1674.49 98.8164   7
   2  -8   4 1538.59 80.5285   9
  -2  -8  -4 1553.07 98.9155   9
   2  -8   5 4.15128 59.8758   7
  -2   8  -5-15.4652 51.5148   6
   2   8   5 51.1375 72.6407   6
  -2  -8  -5 81.2904 63.0505   7
  -2   8  -5-11.2264 51.5025   5
  -2  -8  -5 33.4334 60.0968   2
  -2   8  -5-27.5898 61.3571   4
   2  -8   5 3.75405 54.2281   2
   2   8   5 85.8315 65.6052   4
  -2  -8  -5 121.163 66.1599  13
   2  -8   5 68.1016 49.7841  11
  -2   8  -5 46.8650 66.9382  13
   2   8   5 11.3111 54.2188  11
   2  -8   5 95.9418 62.5213  13
  -2  -8  -5-73.8706 64.6636   9
   2  -8   5 19.2790 49.4021   9
  -2   8  -6 1228.94 72.4108   5
   2  -8   6 1066.38 87.7034   7
   2   8   6 1273.18 100.977   6
  -2   8  -6 1255.55 75.5050   6
  -2  -8  -6 1150.17 85.9946   2
   2   8   6 1279.41 95.0023   4
  -2   8  -6 1160.57 88.7005   4
   2  -8   6 1166.68 79.6556   2
  -2  -8  -6 956.363 89.4105  13
   2   8   6 1234.06 87.4525  11
  -2   8  -6 1034.68 95.2286  13
   2  -8   6 1298.36 74.6989  11
   2  -8   6 1303.91 85.8112  13
   2  -8   6 1128.08 73.1865   9
  -2  -8  -6 1208.08 94.4714   7
  -2  -8  -6 1120.34 90.1011   9
   2   8   7 1587.33 110.882   7
   2  -8   7 1428.28 93.7125   7
   2   8   7 1392.61 107.495   6
  -2   8  -7 1502.07 77.5255   6
  -2   8  -7 1482.09 77.7028   5
   2  -8   7 1506.36 87.9855   2
  -2   8  -7 1332.86 88.0587   4
   2   8   7 1608.25 98.9932   4
  -2  -8  -7 1452.50 89.1535   2
   2  -8   7 1414.25 78.5306  11
   2  -8   7 1448.34 89.4166  13
  -2   8  -7 1399.49 106.956  13
   2   8   7 1343.57 92.8476  11
  -2  -8  -7 1359.11 104.499  13
  -2  -8  -7 1353.54 97.0518   7
   2  -8   7 1620.79 80.5444   9
  -2  -8  -7 1319.42 101.735   9
   2   8   8 163.452 75.6540   6
  -2   8  -8 175.478 51.3186   5
   2  -8   8 174.458 63.5027   7
   2   8   8 33.5954 77.7440   7
  -2   8  -8 231.763 65.3039   4
  -2  -8  -8 68.2883 59.6200   2
   2   8   8 105.101 64.6003   4
   2  -8   8 232.020 60.7482   2
   2   8   8 186.264 67.9661  11
  -2  -8  -8 168.934 74.9524  13
   2  -8   8 104.254 53.9231  11
  -2   8  -8 237.071 79.1569  13
  -2  -8  -8 167.562 52.1108  10
   2  -8   8 183.498 53.5972   9
  -2  -8  -8 65.2597 71.7217   9
   2   8   9 315.390 83.4286   7
  -2   8  -9 393.502 54.9722   5
   2  -8   9 269.740 68.0811   7
   2   8   9 335.870 72.9396   4
  -2  -8  -9 214.457 65.4543   2
   2  -8   9 378.156 62.7235   2
  -2   8  -9 413.078 72.0676   4
   2  -8   9 323.176 55.3601  11
  -2  -8  -9 383.971 80.4482  13
  -2   8  -9 344.216 78.4414  13
  -2  -8  -9 323.953 54.5756  10
   2  -8   9 398.012 58.0037   9
  -2  -8  -9 277.224 82.2148   9
  -2   8 -10 433.183 57.9865   5
   2   8  10 399.214 91.3925   7
   2  -8  10 457.087 74.5013   7
   2   8  10 367.583 73.0475   4
   2  -8  10 392.873 66.0155   1
  -2   8 -10 360.534 70.0364   4
  -2  -8 -10 305.609 62.4577   2
   2  -8  10 519.738 62.2035  11
  -2   8 -10 349.638 83.6406  13
   2   8  10 248.387 28.1074   8
   2  -8  10 481.987 61.5628   9
  -2  -8 -10 287.829 81.6525   9
  -2  -8 -10 441.776 58.1859  10
  -2   8 -11 7.07243 52.4170   5
   2   8  11 77.6973 83.4466   7
   2  -8  11 141.445 68.1160   7
  -2  -8 -11 80.6401 58.1471   2
  -2   8 -11 76.9199 62.3850   4
   2  -8  11-18.5347 59.1291   1
  -2   8 -11-5.89542 73.9769  13
   2  -8  11-18.9706 53.3758  11
   2   8  11 68.7149 31.7281   8
  -2  -8 -11 107.153 51.8320  10
  -2  -9  10 262.886 64.3230   7
  -2   9  10 431.376 86.6408   7
   2   9 -10 174.686 77.7650   4
   2  -9 -10 430.159 70.2098   2
  -2   9  10 273.132 77.0972   4
  -2  -9  10 365.125 75.5834   2
  -2  -9  10 408.907 75.1013  13
   2  -9 -10 340.500 73.0730  10
  -2  -9   9 150.862 60.5168   7
  -2   9   9 87.9401 74.8212   7
   2   9  -9 199.134 41.6519   5
  -2   9   9 139.045 70.3741   4
   2  -9  -9 226.187 65.6443   2
  -2  -9   9 148.532 72.8789   2
   2   9  -9 61.3487 69.6078   4
  -2  -9   9 180.764 39.9970  11
  -2  -9   9 62.0304 69.6886  13
  -2  -9   9 124.593 51.0062   9
   2  -9  -9 276.634 86.5393   9
  -2  -9   8 220.601 64.3814   7
   2   9  -8 217.282 46.1007   5
  -2   9   8 177.062 74.2953   7
  -2  -9   8 87.2946 65.4914   2
  -2   9   8 214.592 75.9411   4
   2  -9  -8 242.843 68.2289   2
   2   9  -8 203.692 77.6655   4
  -2  -9   8 158.481 68.0540  13
   2  -9  -8 100.423 71.5013  13
  -2  -9   8 182.314 40.5355  11
   2  -9  -8 212.300 83.9693   9
  -2  -9   8 151.498 52.1295   8
  -2  -9   8 236.084 48.4489   9
  -2  -9   8 122.096 53.3432   9
   2   9  -7 48.6978 46.1445   5
   2   9  -7 174.196 67.3334   6
  -2  -9   7 25.8319 59.2820   7
  -2   9   7 94.5760 72.6503   7
   2  -9  -7 68.3225 65.1830   2
  -2   9   7 14.6022 66.0825   4
  -2  -9   7 76.2447 67.8228   2
   2   9  -7-58.3174 70.6213   4
  -2  -9   7 24.2718 70.4398  13
  -2  -9   7 32.9904 38.5418  11
   2  -9  -7 28.6436 69.0672  11
   2  -9  -7 58.3944 74.4731  13
  -2   9   7 122.775 68.2720  11
   2  -9  -7 74.7257 74.5222   9
  -2  -9   7 75.0877 46.5607   8
  -2  -9   7-26.1743 48.7403   9
  -2  -9   7 33.9040 51.5153   9
   2   9  -6 46.8399 64.1252   6
   2   9  -6 57.1770 47.7889   5
   2  -9  -6-45.4456 65.4600   7
  -2  -9   6 64.9264 61.1995   7
  -2   9   6 20.5433 71.1256   7
  -2  -9   6 68.5874 64.4494   2
   2  -9  -6 33.0806 61.4949   2
   2   9  -6 48.2801 71.7059   4
  -2   9   6 33.8568 65.8835   4
  -2  -9   6 26.8956 39.9261  11
   2  -9  -6 26.6637 65.9758  13
  -2   9   6 67.2066 63.5162  11
  -2  -9   6 4.97626 68.6913  13
   2  -9  -6 4.58593 61.4076  11
  -2  -9   6 18.1921 51.6246   9
  -2  -9   6 32.8190 41.0192   8
   2  -9  -6 15.6782 72.7278   9
   2   9  -5 52.8268 64.2359   6
  -2   9   5 4.98384 65.3231   7
  -2  -9   5-43.3299 59.8062   7
   2  -9  -5-40.1323 67.1709   7
   2   9  -5 2.71625 49.2857   5
  -2   9   5 34.7565 65.1971   4
  -2  -9   5 4.63938 62.8739   2
   2   9  -5 5.41117 69.7536   4
   2  -9  -5 109.616 66.6449   2
   2  -9  -5 17.5528 58.9621  11
  -2  -9   5 35.5544 39.9369  11
  -2   9   5 64.3842 60.9299  11
  -2  -9   5 40.6623 66.7410  13
   2  -9  -5 48.0338 70.7118  13
  -2  -9   5 77.6623 57.5326   9
  -2  -9   5-13.6254 35.5162   8
   2  -9  -5 40.7468 68.6730   9
   2  -9  -4 75.1739 72.4095   7
   2   9  -4-30.3443 55.8606   5
   2   9  -4 139.348 68.6619   6
  -2  -9   4 141.104 67.6898   7
  -2   9   4-5.32280 73.8512   6
  -2  -9   4 79.7632 64.7859   2
   2  -9  -4 149.780 67.5829   2
  -2   9   4 35.4781 67.4094   4
   2   9  -4 81.4924 73.1423   4
  -2  -9   4 42.8250 40.3226  11
   2   9  -4 128.371 50.9021  12
   2  -9  -4 55.1612 59.7342  11
  -2   9   4 115.427 62.4931  11
   2  -9  -4 149.289 66.6512  13
  -2  -9   4 73.7320 64.7758  13
   2  -9  -4 49.8960 68.2123   9
  -2  -9   4 92.8638 56.7869   9
  -2  -9   4 76.6204 30.6490   8
   2   9  -3 121.459 57.6152   5
   2  -9  -3 114.067 68.8349   7
  -2   9   3 160.180 74.4519   6
  -2  -9   3 135.257 63.5272   7
   2   9  -3 101.462 68.0103   6
  -2   9   3 164.412 67.0167   4
  -2  -9   3 56.8031 63.2068   2
   2  -9  -3 30.0581 62.9021   2
  -2  -9   3 153.207 46.3942  11
  -2  -9   3 75.1114 69.5901  13
   2  -9  -3 200.590 67.4462  13
   2   9  -3 159.980 54.1135  12
  -2   9   3 96.1197 53.1141  12
  -2   9   3 113.928 58.7221  11
   2  -9  -3 86.3182 59.1553  11
  -2  -9   3 98.0307 57.8017   9
  -2  -9   3 88.4882 24.7254   8
   2  -9  -3 78.5560 70.6414   9
   2   9  -2 13.7608 71.0466   6
   2  -9  -2 34.0989 68.4452   7
  -2  -9   2 25.0922 63.7560   7
  -2   9   2 44.8969 68.8123   5
  -2   9   2 119.284 72.9678   6
  -2   9   2 72.4919 64.5835   4
  -2  -9   2 57.0536 62.9966   2
  -2  -9   2 16.5754 44.6478  11
   2  -9  -2 19.9664 55.2159  11
   2   9  -2-31.2452 54.2228  12
  -2   9   2 92.9107 50.7519  12
  -2  -9   2 10.9448 64.8826  13
  -2  -9   2 49.5752 58.1382   9
   2  -9  -2 38.5462 72.3599   9
   2   9  -1 84.0564 59.7945   7
  -2   9   1 33.2503 69.0236   6
  -2  -9   1 8.55791 62.5456   7
  -2   9   1-86.6480 68.4858   5
   2   9  -1-19.0257 65.0070   6
   2  -9  -1 9.59150 66.0902   7
   2  -9  -1 112.621 62.1938   2
  -2   9   1 36.4877 62.7535   4
   2   9  -1-38.1577 68.2596   4
  -2  -9   1-4.76078 65.6082   2
   2   9  -1 16.6337 55.0938  12
   2  -9  -1 19.3869 54.9943  11
  -2  -9   1 11.3436 66.7946  13
  -2   9   1-6.27900 61.3879  13
  -2  -9   1 23.7655 46.9621  11
  -2   9   1 89.8936 46.0262  12
   2  -9  -1 56.2110 65.8154   9
  -2  -9   1 99.6022 63.2159   9
  -2   9   0 69.5136 64.5819   5
   2  -9   0 113.519 66.1375   7
  -2   9   0 144.405 64.0097   6
   2   9   0 209.010 68.3458   7
   2   9   0 82.9990 69.1282   6
  -2  -9   0 144.948 66.6096   7
   2   9   0 157.626 70.4257   4
  -2   9   0 130.631 67.3317   4
   2  -9   0 172.698 62.4739   2
   2  -9   0 166.904 67.4623  13
  -2   9   0 188.241 45.4393  12
  -2   9   0 208.209 76.3724  13
   2  -9   0 145.925 58.9666  11
   2   9   0 236.285 59.6372  12
   2   9   0 232.473 51.8645  11
  -2  -9   0 211.384 73.3221  13
  -2  -9   0 178.404 65.0304   9
   2  -9   0 112.655 67.5837   9
   2  -9   1 28.0783 65.8575   7
   2   9   1-13.9791 62.5051   7
  -2   9  -1 30.6620 59.9050   5
  -2  -9  -1 45.1063 64.5702   7
  -2   9  -1-8.56733 65.1289   6
   2   9   1 59.5178 67.4853   4
   2  -9   1-8.59943 60.2237   2
  -2   9  -1 56.9334 71.5902  13
   2   9   1 55.2569 48.1667  11
   2  -9   1 7.25015 52.3679  11
  -2   9  -1 12.0995 41.1397  12
   2  -9   1 113.063 70.7082  13
   2   9   1 67.2347 56.2527  12
  -2  -9  -1 22.9633 69.2639  13
  -2  -9  -1 82.0077 65.0893   9
   2  -9   1 40.8856 22.9569   8
   2   9   2 1296.38 99.0792   7
  -2   9  -2 1118.33 82.5479   5
   2  -9   2 1208.94 93.0817   7
  -2   9  -2 1542.22 94.5137   6
  -2  -9  -2 1209.99 91.1283   2
   2  -9   2 1159.05 88.9690   2
   2   9   2 1219.97 97.2262   4
  -2   9  -2 1193.10 58.6387  12
   2  -9   2 1290.29 80.5333  11
   2   9   2 1283.13 89.4813  12
   2   9   2 1346.61 79.8551  11
   2  -9   2 1189.32 96.1771  13
  -2  -9  -2 1350.01 95.9423   7
  -2  -9  -2 1422.58 96.8377   9
  -2  -9  -3 243.553 71.8412   7
  -2   9  -3 243.556 62.1244   5
  -2   9  -3 108.969 64.8395   6
   2  -9   3 303.173 71.3007   7
   2   9   3 275.174 72.9837   7
  -2   9  -3 205.425 72.1950   4
   2   9   3 112.238 68.1462   4
  -2  -9  -3 201.072 71.5340   2
   2  -9   3 240.538 67.2878   2
   2  -9   3 247.859 70.3549  13
   2  -9   3 169.027 56.3381  11
   2   9   3 230.291 67.7455  12
   2   9   3 211.838 60.6803  11
  -2  -9  -3 176.845 73.6237   9
  -2  -9  -4 390.681 74.3463   7
  -2   9  -4 632.377 68.2282   5
   2   9   4 401.484 86.0011   6
   2  -9   4 451.642 75.9344   7
  -2   9  -4 464.177 69.4656   6
   2   9   4 505.295 82.7209   7
   2  -9   4 528.227 75.6259   2
  -2  -9  -4 558.142 78.8969   2
  -2   9  -4 529.264 78.7740   4
   2   9   4 445.799 76.4619   4
   2   9   4 440.400 74.9902  12
   2  -9   4 481.125 78.6712  13
  -2   9  -4 420.627 84.1905  13
   2   9   4 422.656 67.9069  11
   2  -9   4 410.753 60.6006  11
  -2  -9  -4 429.071 86.0520  13
  -2  -9  -4 383.579 78.8293   9
   2  -9   4 479.692 64.5532   9
  -2   9  -5 163.609 61.6617   6
  -2  -9  -5 130.739 72.5579   7
   2  -9   5 122.047 67.6457   7
  -2   9  -5 75.7854 58.6454   5
   2   9   5 131.282 80.4594   6
   2  -9   5 163.595 66.2952   2
  -2  -9  -5 85.9778 69.0283   2
   2   9   5 136.660 73.0699   4
  -2   9  -5 78.6492 68.2307   4
  -2   9  -5 83.2484 77.2989  13
   2  -9   5 113.701 67.1344  13
   2  -9   5 119.370 53.6416  11
   2   9   5 103.960 72.5623  12
   2   9   5 130.104 61.1150  11
  -2  -9  -5 14.7916 72.6363   9
   2  -9   5 138.113 57.6483   9
  -2   9  -6 902.095 73.3037   6
  -2   9  -6 861.109 70.6979   5
   2  -9   6 956.952 86.1679   7
  -2  -9  -6 640.092 81.3727   2
   2   9   6 701.529 87.4688   4
  -2   9  -6 850.619 87.0152   4
   2  -9   6 786.862 79.2435   2
   2  -9   6 911.459 69.6898  11
   2   9   6 784.991 89.4640  12
  -2   9  -6 576.906 89.3235  13
   2   9   6 769.666 79.6333  11
   2  -9   6 795.687 71.4324   9
  -2  -9  -6 810.854 91.2993   9
  -2   9  -7 119.158 55.9284   6
  -2   9  -7 24.7871 56.2309   5
   2  -9   7 48.6707 68.8058   7
  -2  -9  -7-47.0049 67.6426   2
  -2   9  -7 49.5770 73.3164   4
   2   9   7 20.4791 72.2826   4
   2  -9   7 101.878 65.0474   2
   2   9   7 60.8317 67.3953  11
   2  -9   7 64.6039 54.4119  11
  -2   9  -7 64.1956 81.3480  13
  -2  -9  -7 46.7158 74.0825   9
   2  -9   7 73.2578 57.3971   9
  -2   9  -8 283.896 57.9178   5
   2  -9   8 292.505 74.8455   7
   2   9   8 153.744 84.1010   7
  -2   9  -8 142.024 75.1746   4
   2   9   8 150.549 74.4282   4
  -2  -9  -8 74.1514 66.9396   2
   2  -9   8 243.510 66.3617   2
   2  -9   8 204.901 55.7721  11
  -2   9  -8 211.746 84.3582  13
  -2  -9  -8 238.856 82.3170   9
  -2  -9  -8 83.2824 58.0677  10
   2  -9   8 183.907 58.6473   9
  -2   9  -9 90.4953 54.2450   5
   2   9   9 78.6301 81.4438   7
   2  -9   9-4.31369 70.6567   7
   2   9   9 63.8589 74.0090   4
  -2   9  -9 100.402 72.9216   4
   2  -9   9 213.421 66.0426   2
  -2  -9  -9 71.0614 66.5999   2
  -2   9  -9 83.2736 81.0399  13
   2  -9   9 121.179 57.9092  11
   2  -9   9 102.626 57.7607   9
  -2  -9  -9 169.022 58.3928  10
  -2  -9  -9 151.257 82.4937   9
   2  10  -8 67.5968 84.7179   4
  -2 -10   8-37.1450 76.1969   2
   2 -10  -8 88.2637 71.0262   2
  -2  10   8 42.6251 72.3405   4
   2  10  -8 108.034 47.7822   5
  -2 -10   8 70.0831 67.0096   7
  -2  10   8 112.687 82.3638   7
  -2 -10   8 17.0244 55.3119   9
  -2 -10   8 34.7090 49.1215   8
   2 -10  -8 79.8854 86.8760   9
  -2  10   7 151.416 73.4380   4
  -2 -10   7 138.135 80.1539   2
   2  10  -7 5.73196 80.6863   4
   2 -10  -7 146.539 71.4836   2
  -2 -10   7 72.5254 67.4351   7
  -2  10   7 187.668 79.7545   7
   2  10  -7 66.6798 53.2711   5
  -2 -10   7 86.6051 58.4010   9
  -2 -10   7 54.0609 45.4590   8
   2 -10  -7 107.004 84.0094   9
  -2  10   6 784.353 92.2096   7
  -2 -10   6 670.333 80.0672   7
   2  10  -6 619.923 82.6151   6
   2  10  -6 756.720 63.3650   5
  -2 -10   6 581.578 83.2785   2
  -2  10   6 622.896 92.3167   4
   2 -10  -6 726.671 83.7094   2
   2  10  -6 429.296 90.6470   4
  -2 -10   6 558.156 52.5175  11
   2 -10  -6 623.331 83.0367  11
  -2 -10   6 511.353 48.0104   8
   2 -10  -6 553.727 93.0144   9
  -2 -10   6 582.384 70.3748   9
   2  10  -5 556.363 83.4098   6
   2  10  -5 479.795 64.0194   5
  -2 -10   5 648.777 81.4844   7
  -2  10   5 555.441 89.4804   4
   2 -10  -5 734.532 86.1135   2
  -2 -10   5 373.591 79.1252   2
   2  10  -5 585.899 93.8656   4
  -2  10   5 497.970 72.1723  12
  -2 -10   5 521.001 56.7097  11
   2 -10  -5 680.728 82.9646  11
  -2 -10   5 559.906 71.7801   9
   2 -10  -5 694.453 94.4366   9
  -2 -10   5 471.806 41.4888   8
   2  10  -4-16.2288 59.7314   5
   2  10  -4-36.1977 71.8867   6
  -2 -10   4 43.2016 68.8919   7
  -2  10   4 65.8188 73.1908   4
   2  10  -4-23.5757 81.0931   4
  -2 -10   4-14.9855 75.1220   2
   2 -10  -4 104.486 72.1754   2
   2  10  -4 72.4476 51.4797  12
  -2  10   4 52.1608 64.6102  11
   2 -10  -4 62.6459 66.3605  11
  -2 -10   4 77.8504 49.0628  11
  -2  10   4-3.62533 59.9065  12
   2 -10  -4 58.3387 74.8726   9
  -2 -10   4 146.111 66.4165   9
  -2 -10   4 42.3147 28.0039   8
   2  10  -3 300.412 80.9414   6
  -2 -10   3 340.142 75.0055   7
  -2  10   3 153.197 76.0003   5
   2  10  -3 262.253 67.8394   5
  -2  10   3 291.935 80.8487   4
  -2 -10   3 286.360 76.9427   2
   2 -10  -3 409.485 76.8112   2
   2 -10  -3 282.161 69.6980  11
  -2  10   3 356.409 63.0164  12
   2  10  -3 436.609 61.6403  12
  -2 -10   3 377.717 57.0377  11
  -2 -10   3 362.231 72.2264   9
   2 -10  -3 328.258 83.2080   9
  -2  10   2 1253.73 101.035   5
  -2  10   2 1305.00 107.415   6
   2  10  -2 1251.85 91.2751   5
   2  10  -2 1072.01 99.4830   6
  -2 -10   2 1136.83 99.7569   2
  -2  10   2 1220.33 101.251   4
  -2  10   2 1204.90 77.1032  12
  -2 -10   2 1347.89 78.2789  11
   2 -10  -2 1182.61 89.2283  11
   2  10  -2 1180.13 80.8000  12
  -2 -10   2 1286.12 96.3748   9
  -2 -10   2 1425.77 100.080   7
   2 -10  -2 1446.27 106.048   9
  -2  10   1 418.629 82.6596   6
  -2 -10   1 337.337 76.4834   7
  -2  10   1 172.341 71.9288   5
   2  10  -1 224.902 82.5131   4
   2 -10  -1 400.783 77.6262   2
  -2  10   1 257.470 80.2466   4
  -2 -10   1 371.225 78.0301   2
   2 -10  -1 320.285 67.6471  11
   2  10  -1 231.353 64.3711  12
  -2  10   1 330.693 56.6380  12
  -2 -10   1 279.594 71.4806   9
   2 -10  -1 342.437 82.9141   9
   2  10   0 230.539 71.5727   7
   2 -10   0 239.531 75.7971   7
  -2 -10   0 288.683 72.5707   7
  -2  10   0 293.340 77.2734   6
  -2  10   0 240.834 74.0761   5
   2 -10   0 386.173 74.9582   2
   2  10   0 236.312 86.4212   4
  -2  10   0 279.896 77.5707   4
   2 -10   0 357.405 69.5647  11
  -2  10   0 170.040 49.9193  12
   2  10   0 313.399 56.4258  11
   2  10   0 114.113 62.2650  12
   2 -10   0 268.131 76.8241   9
  -2 -10   0 326.255 77.6090   9
  -2  10  -1 142.710 73.0597   6
   2 -10   1 45.3224 73.6232   7
  -2 -10  -1 72.4820 71.3657   7
  -2  10  -1 73.4086 66.7816   5
   2  10   1 64.2074 74.6982   7
   2 -10   1 114.514 70.4985   2
   2  10   1 105.818 75.9392   4
   2  10   1 122.437 58.6488  11
   2 -10   1 38.8052 57.3195  11
   2  10   1 3.89415 60.1767  12
  -2  10  -1 89.1291 83.4369  13
  -2  10  -1 27.3792 42.0764  12
   2 -10   1 138.473 74.4512   9
  -2 -10  -1 97.3189 75.2594   9
   2  10   2 564.174 87.7475   7
  -2  10  -2 640.911 82.6518   6
   2 -10   2 552.876 84.3433   7
  -2  10  -2 553.998 74.6957   5
   2  10   2 632.579 89.6232   4
  -2  10  -2 486.516 87.6609   4
   2 -10   2 647.259 82.1982   2
  -2 -10  -2 646.896 86.5554   2
   2  10   2 705.434 78.9088  12
  -2  10  -2 561.093 47.7324  12
   2 -10   2 485.299 66.4911  11
   2  10   2 527.513 66.4007  11
  -2 -10  -2 398.370 80.3501   9
   2 -10   2 670.317 82.6199   9
   2 -10   2 339.022 30.4916   8
  -2  10  -3 206.004 64.2477   5
   2 -10   3 137.901 74.7214   7
   2  10   3 149.677 78.1803   7
  -2  10  -3 170.863 73.8472   6
  -2 -10  -3 59.7152 70.2987   2
   2 -10   3 166.176 71.8392   2
  -2  10  -3 11.1173 71.1642   4
   2  10   3 64.0014 77.2705   4
   2  10   3 95.6385 61.1126  11
  -2  10  -3 54.9184 79.2312  13
   2  10   3 131.887 72.8514  12
   2 -10   3 161.413 61.0858  11
  -2 -10  -3 123.706 77.9712   9
   2 -10   4 43.8164 73.8290   7
  -2  10  -4 159.716 61.4984   5
  -2  10  -4 66.7918 68.9634   6
   2  10   4 127.177 80.1209   7
   2 -10   4 53.1498 70.2895   2
  -2 -10  -4-24.4156 74.8512   2
  -2  10  -4 89.4278 78.0422   4
   2  10   4-5.76045 74.9630   4
   2  10   4 34.8933 62.2145  11
   2  10   4 65.3147 71.0371  12
   2 -10   4 42.9950 58.8757  11
  -2  10  -4 109.907 85.6822  13
  -2 -10  -4-10.1669 77.4008   9
   2 -10   4 135.420 64.8597   9
  -2  10  -5 102.634 66.8332   6
  -2  10  -5 16.1137 62.0390   5
   2 -10   5 86.6360 73.0849   7
   2  10   5 74.3771 79.7544   7
   2  10   5 39.8833 75.4973   4
   2 -10   5 52.3867 70.3004   2
  -2  10  -5 27.7747 77.6842   4
  -2 -10  -5 52.7745 74.8945   2
   2  10   5 48.8567 65.4068  11
   2  10   5-24.4600 76.8542  12
   2 -10   5 73.5981 58.3800  11
  -2  10  -5 54.9177 83.5353  13
   2 -10   5 96.0488 63.4754   9
  -2 -10  -5 52.0130 81.6087   9
  -2  10  -6 380.775 67.8375   6
  -2  10  -6 431.282 69.0841   5
   2 -10   6 412.320 72.9958   2
  -2  10  -6 451.292 86.8760   4
  -2 -10  -6 426.811 79.9682   2
   2  10   6 264.534 85.0720   4
   2 -10   6 385.705 63.9621  11
  -2  10  -6 281.135 82.6376  13
   2  10   6 290.991 86.0224  12
   2 -10   6 405.412 69.6704   9
  -2 -10  -6 404.043 89.4485   9
  -2  11   3 144.755 84.7956   5
   2  11  -3 67.0798 71.1358   5
   2 -11  -3 275.014 74.0194   2
  -2 -11   3 100.068 81.7453   2
   2  11  -3 170.981 89.1758   4
  -2  11   3 235.006 85.2610   4
   2 -11  -3 77.0533 68.3351  11
   2  11  -3 243.003 60.9193  12
  -2  11   3 107.092 59.8274  12
   2 -11  -3 109.459 84.8306   9
  -2 -11   3 112.840 71.2302   9
   2  11  -2 12.1848 74.2132   5
  -2  11   2-59.6362 83.5357   5
  -2 -11   2-5.31267 76.9987   2
  -2  11   2 169.991 84.6482   4
  -2  11   2 221.726 58.4993  12
   2  11  -2 118.988 63.2753  12
   2 -11  -2 39.6600 67.7499  11
   2 -11  -2 134.343 84.5462   9
  -2 -11   2 192.625 77.6323   9
   2  11  -1-4.33026 79.1841   5
  -2  11   1 136.623 79.4473   5
  -2  11   1 158.738 86.6091   4
   2  11  -1 203.275 88.8439   4
  -2 -11   1-5.32269 79.7304   2
   2 -11  -1 266.308 73.2298  11
   2  11  -1 42.0409 64.7285  12
  -2  11   1 21.9926 54.3081  12
  -2 -11   1 54.7790 77.9906   9
   2 -11  -1 84.8848 81.0040   9
  -2  11   0 89.1503 75.3444   5
   2 -11   0 87.5104 73.4417   2
   2  11   0 139.525 85.5338   4
  -2  11   0 269.183 87.3291   4
   2  11   0 37.4117 65.9538  12
  -2  11   0 67.6863 49.9412  12
   2 -11   0 108.613 71.1525  11
  -2 -11   0 47.3158 76.1207   9
   2 -11   0 114.469 80.2982   9
   2  11   1 113.289 79.8617   7
  -2  11  -1 21.2149 72.7053   5
   2  11   1-6.31269 85.2601   4
   2 -11   1 115.515 74.8389   2
   2  11   1 69.6099 58.7029  11
   2 -11   1-20.3847 65.4083  11
   2  11   1-71.8739 69.7910  12
  -2  11  -1 48.6291 46.9143  12
   2 -11   1-10.1833 80.5886   9
  -2 -11  -1 39.2274 79.0475   9
  -3   0  18 19.5874 65.4618  11
   3   0 -18 4.55479 50.2708   9
  -3   0  17 12.8083 49.4741   7
  -3   0  17 80.3974 49.5846   5
  -3   0  17 34.0649 61.6754  11
   3   0 -17 2.27750 47.1856   9
  -3   0  16 49.9104 46.8905   7
  -3   0  16 69.6971 46.5505   5
  -3   0  16-10.8375 56.2470  11
  -3   0  16 6.64801 63.9814  10
   3   0 -16 47.1827 45.0376   9
  -3   0  15 6346.12 177.147   5
  -3   0  15 6528.76 181.456   7
  -3   0  15 6454.59 195.452  11
  -3   0  15 6666.74 195.560  10
   3   0 -15 6175.02 177.297   9
  -3   0  14-16.2788 40.7179   5
  -3   0  14 9.09664 38.0439   7
  -3   0  14-25.8439 49.2454  11
   3   0 -14 4.23473 38.9961   9
  -3   0  14 12.1057 53.8590  10
  -3   0  13 159.533 39.0583   7
  -3   0  13 169.789 38.5818   5
  -3   0  13 141.838 50.2228  11
  -3   0  13 157.758 52.3192  10
   3   0 -13 173.373 39.3288   9
  -3   0  12 24.2582 32.7146   5
  -3   0  12 45.1340 34.0165   7
  -3   0  12-2.79738 43.0434  11
   3   0 -12-17.4313 34.5372   9
  -3   0  11 3994.77 114.995   7
  -3   0  11 3927.40 114.458   5
  -3   0  11 3963.98 96.0501   4
  -3   0  11 3672.37 93.8696   2
  -3   0  11 4181.14 127.087  11
   3   0 -11 3941.23 114.983   9
  -3   0  10 15.8149 25.4635   7
  -3   0  10 22.4003 17.0509   4
  -3   0  10-11.5969 28.4172   5
  -3   0  10-10.9742 16.3979   1
  -3   0  10 9.30361 34.1451  11
   3   0 -10-18.3284 40.0010  10
   3   0 -10 18.3966 27.8525   9
  -3   0   9 21589.0 505.155   7
  -3   0   9 21235.4 506.965   5
  -3   0   9 21163.7 494.807   1
  -3   0   9 22234.0 516.605  11
   3   0  -9 21913.1 516.176  10
   3   0  -9 21611.4 507.768   9
  -3   0   8-11.6796 18.2534   7
   3   0  -8 9.31314 15.6914   1
  -3   0   8 11.3436 15.6697   1
  -3   0   8-0.73843 15.3418   3
  -3   0   8-12.8892 25.5820  11
   3   0  -8 4.16259 20.5458   9
   3   0  -8 18.8804 27.5559  10
  -3   0   7 4683.71 122.496   7
   3   0  -7 4852.70 119.902   1
  -3   0   7 4728.17 120.325   3
  -3   0   7 4770.93 120.184   1
   3   0  -7 4954.86 132.796  10
  -3   0   7 4871.94 131.721  11
   3   0  -7 4826.12 126.642   9
  -3   0   6-3.13878 13.6720   7
   3   0  -6 43.5427 17.1905   1
  -3   0   6 62.0131 18.3665   1
  -3   0   6 40.6254 17.0916   3
  -3   0   6 1.34913 18.8445  11
   3   0  -6 14.8483 17.9693   9
   3   0  -6 70.9220 25.5390  10
  -3   0   5 12940.0 305.777   7
   3   0  -5 13474.4 309.832   1
  -3   0   5 13358.3 309.756   1
  -3   0   5 13262.3 310.283   3
   3   0  -5 13335.1 313.827  11
   3   0  -5 13027.8 315.212  10
  -3   0   5 12959.3 313.323  11
   3   0  -5 13110.2 306.088   7
   3   0  -5 13054.1 310.089   9
   3   0  -4 9.76161 10.7285   7
  -3   0   4-4.67055 12.7942   5
  -3   0   4 20.0968 16.7821   3
  -3   0   4 28.5442 20.1853   1
  -3   0   4 6.59364 15.8507  11
   3   0  -4 0.97208 14.9826  11
  -3   0   4 41.1394 18.5548  10
  -3   0   3 27052.4 620.887   5
  -3   0   3 27295.8 625.388   3
  -3   0   3 26590.6 624.853   1
  -3   0   3 26924.1 623.853  10
  -3   0   3 27137.2 622.688  11
   3   0  -3 27741.6 629.216   8
  -3   0   2 62.3336 17.9711   1
  -3   0   2 31.6160 13.0066   5
   3   0  -2 18.1220 15.3943   8
  -3   0   1 27645.5 630.784   5
  -3   0   1 27182.8 633.858   1
   3   0  -1 28727.5 632.749  12
  -3   0   1 27257.6 631.049   9
   3   0  -1 26469.5 634.184   8
  -3   0   0 174.188 19.3318   5
  -3   0   0 131.470 19.8895   9
   3   0   1 212804. 4683.25   5
  -3   0  -1 200003. 4676.18   6
   3   0   1 203683. 4681.14   1
   3   0   1 211000. 4682.05  12
  -3   0  -1 212834. 4684.29   9
   3   0   2 953.942 40.1242   5
  -3   0  -2 962.333 39.8187   9
  -3   0  -3 201.169 19.5783   3
  -3   0  -3 206.581 19.0689   1
   3   0   3 173.786 18.7548   1
   3   0   3 100.324 12.8112   6
   3   0   3 175.031 24.3248   5
  -3   0  -3 117.078 24.3321   9
   3   0   3 172.177 25.8436   9
  -3   0  -4 108.322 18.2949   1
  -3   0  -4 94.9805 17.9126   3
   3   0   4 68.1686 17.8683   1
   3   0   4 82.9427 27.0336   5
   3   0   4 54.1040 26.7335   9
  -3   0  -5 74.1880 16.7862   3
   3   0   5 78.8331 17.2422   1
  -3   0  -5 81.8889 16.6026   1
   3   0   5 64.5488 28.3195   5
   3   0   5 95.5176 20.8344  10
   3   0   5 56.6591 30.4079   9
  -3   0  -6 2.22067 15.2684   3
   3   0   6 11.6068 16.1262   1
  -3   0  -6 0.71275 16.1912   1
   3   0   6 10.0794 28.4572   5
  -3   0  -6 13.3419 30.2884   9
   3   0   6 25.3703 22.2918  10
   3   0   6 4.67989 33.0318   9
   3   0   7 1650.62 69.7308   5
  -3   0  -7 1563.21 47.2341   1
   3   0   7 1550.08 58.2285  10
  -3   0  -7 1657.30 71.3112   9
   3   0   7 1549.11 71.3323   9
  -3   0  -8-10.8400 16.6930   1
  -3   0  -8-41.4768 41.2936   5
   3   0   8 62.8861 35.5525   5
   3   0   8 16.8142 37.8478   9
  -3   0  -8 18.1133 36.4128   9
  -3   0  -9 7709.71 184.614   2
  -3   0  -9 7601.39 185.993   4
  -3   0  -9 8077.47 223.287   5
   3   0   9 8346.13 214.946   5
   3   0   9 8231.89 221.779   9
  -3   0  -9 8113.86 217.365   9
   3   0  10 41.8143 44.2110   5
  -3   0 -10 69.4014 47.5097   9
   3   0  10 25.8103 46.1876   9
   3   0  10 13.5964 37.1385  10
   3   0  11 1221.04 71.5088   5
   3   0  11 1284.86 64.5672  10
   3   0  11 1163.77 77.8226   9
  -3   0 -11 1111.39 70.4511   9
   3   0  12-2.85483 50.0078   5
  -3   0 -12 69.0067 53.1806   9
   3   0  12 78.3641 45.9529  10
   3   0  12 32.5139 54.3355   9
   3   0  13 3957.40 135.771   5
   3   0  13 3979.54 128.686  10
  -3   0 -13 4149.73 141.307   9
   3   0  13 4014.21 147.428   9
   3   0  14 52.1915 63.3910   7
   3   0  14 54.2770 54.7211   5
  -3   0 -14 46.5054 58.2444   9
   3   0  14-19.7922 66.5965   9
   3   0  14 83.1223 52.6446  10
   3   0  15 111.527 61.0858   5
   3   0  15 99.5401 66.3932   7
  -3   0 -15 81.3366 60.3916   9
   3   0  15 13.2095 57.9246  10
   3   0  15 44.8197 70.5713   9
   3   0  16 72.7956 70.2749   7
   3   0  16-31.5081 59.2085   5
  -3   0 -16 190.659 54.2551  13
   3   0  16 50.2360 70.1233   9
  -3   0 -16-24.0552 65.0856   9
   3   0  16 71.9760 61.4338  10
  -3  -1  18 105.859 65.3272  11
   3   1 -18 192.840 46.9930   9
   3  -1 -18 178.413 58.3338   9
  -3  -1  17 291.448 48.1334   7
  -3  -1  17 344.638 49.5477   5
  -3   1  17 284.152 57.0977   5
  -3   1  17 393.859 61.0001   7
  -3  -1  17 307.231 65.1016  11
  -3   1  17 382.262 71.3253  11
   3  -1 -17 312.794 58.7020   9
   3   1 -17 261.909 46.6147   9
  -3  -1  16 1439.98 68.1574   5
  -3  -1  16 1313.11 68.4080   7
  -3   1  16 1476.84 77.4719   5
  -3   1  16 1709.23 83.6516   7
  -3   1  16 1532.83 94.7402  11
  -3  -1  16 1518.75 85.3589  11
  -3  -1  16 1649.10 91.7242  10
   3  -1 -16 1386.43 78.4798   9
   3   1 -16 1591.84 68.0689   9
  -3   1  16 1495.87 94.4226  10
  -3  -1  15 1756.16 73.5682   7
  -3  -1  15 1670.20 71.8699   5
  -3   1  15 1809.01 82.8629   5
  -3   1  15 1992.65 86.9073   7
  -3  -1  15 1848.59 93.1778  10
  -3   1  15 1930.41 96.7989  11
  -3  -1  15 1993.91 90.2396  11
   3  -1 -15 1789.38 86.0055   9
   3   1 -15 1829.36 73.0717   9
  -3   1  15 1776.55 96.8630  10
  -3   1  14 1897.98 80.6813   5
  -3   1  14 1708.94 80.3216   7
  -3  -1  14 1681.53 68.7060   5
  -3  -1  14 1696.65 71.0914   7
  -3   1  14 1762.53 92.0118  11
  -3  -1  14 1973.27 90.1989  10
  -3   1  14 1736.45 93.4671  10
  -3  -1  14 1684.00 83.8521  11
   3   1 -14 1641.12 69.5022   9
   3  -1 -14 1988.16 84.2140   9
  -3   1  13 50.8050 42.1814   7
  -3  -1  13 50.2191 32.3559   7
  -3  -1  13 73.7978 33.2778   5
  -3   1  13 93.2636 42.6504   5
  -3  -1  13 82.1525 44.5848  11
  -3   1  13 23.2468 47.3359  11
  -3   1  13 15.1897 53.9725  10
   3  -1 -13 61.6520 51.2462  10
   3  -1 -13-10.2141 44.1891   9
   3   1 -13 86.2173 34.0408   9
  -3  -1  12 1508.78 55.0480   5
  -3   1  12 1414.91 68.0264   5
  -3   1  12 1417.07 66.3357   7
  -3  -1  12 1480.06 55.2874   7
  -3   1  12 1409.02 75.4295  10
  -3  -1  12 1405.57 69.0456  11
  -3   1  12 1366.54 74.1743  11
   3  -1 -12 1533.37 73.8792  10
   3   1 -12 1445.88 55.3010   9
   3  -1 -12 1538.22 68.5627   9
  -3  -1  11 6162.64 161.696   5
  -3   1  11 6463.27 176.332   5
  -3  -1  11 6493.99 162.848   7
  -3   1  11 6693.09 175.996   7
  -3  -1  11 6257.87 149.276   1
  -3   1  11 6211.05 151.900   2
  -3  -1  11 6479.50 153.839   4
   3  -1 -11 6420.37 149.945   1
  -3  -1  11 6107.40 149.461   3
  -3   1  11 6874.54 186.277  11
  -3   1  11 6340.53 182.102  10
   3  -1 -11 5590.65 149.048  13
  -3  -1  11 6858.19 177.234  11
   3  -1 -11 6592.29 179.580  10
   3   1 -11 6377.69 162.474   9
   3  -1 -11 6670.59 177.868   9
  -3   1  10 3177.85 99.5263   7
  -3  -1  10 2950.81 87.3289   5
  -3  -1  10 3065.40 80.6665   3
   3  -1 -10 3130.63 80.6369   1
  -3  -1  10 3083.06 85.0990   4
  -3   1  10 3060.01 82.6224   2
  -3  -1  10 3093.61 80.3964   1
   3  -1 -10 3334.91 105.682  10
  -3  -1  10 3229.93 100.680  11
   3  -1 -10 2857.32 78.0421  13
  -3   1  10 3232.60 109.448  11
   3  -1 -10 3226.32 103.281   9
  -3  -1  10 3167.07 87.8671   7
   3   1 -10 3179.71 89.0021   9
  -3  -1   9 43.4619 20.6995   5
  -3  -1   9 37.2002 18.6360   7
  -3   1   9 31.4079 28.5128   7
  -3  -1   9 22.5455 19.0760   3
  -3   1   9 43.3070 18.3038   2
  -3  -1   9 49.0400 18.8987   1
  -3  -1   9 20.2378 20.7358   4
   3  -1  -9 33.0767 19.2914   1
  -3   1   9 70.1048 33.4859  11
   3  -1  -9 32.0134 12.2864  13
  -3  -1   9 30.0893 27.1010  11
   3  -1  -9 14.3365 32.9054  10
   3   1  -9 36.7323 20.9043   9
   3  -1  -9 22.7880 29.8888   9
  -3  -1   8 472.136 22.8610   7
  -3  -1   8 460.206 24.3980   5
  -3   1   8 523.309 34.9395   7
   3  -1  -8 449.347 27.2308   1
  -3  -1   8 428.154 26.8228   1
  -3  -1   8 462.808 29.2844   4
  -3   1   8 491.648 26.0111   2
   3  -1  -8 450.908 37.5102  10
   3  -1  -8 396.681 19.1597  13
  -3  -1   8 439.521 32.0837  11
  -3   1   8 486.805 41.2399  11
   3  -1  -8 401.615 34.8472   9
   3   1  -8 437.267 24.1556   9
   3  -1  -7 162.057 26.5939   7
  -3   1   7 114.271 23.7341   7
  -3  -1   7 134.354 13.0376   7
  -3  -1   7 112.785 15.1727   5
   3  -1  -7 128.461 20.5920   1
  -3  -1   7 125.687 20.7360   1
  -3   1   7 125.088 19.7715   1
  -3  -1   7 130.822 22.0606   4
  -3   1   7 151.280 29.5073  11
  -3  -1   7 147.485 21.4280  11
   3  -1  -7 104.545 12.7076  13
   3   1  -7 146.324 15.7362   9
   3  -1  -7 152.520 27.5843   9
   3  -1  -7 111.725 26.6124  10
  -3   1   6 108.969 21.5218   7
   3  -1  -6 64.5770 20.4332   7
   3  -1  -6 143.521 20.3564   1
  -3  -1   6 63.6718 11.8025   5
   3  -1  -6 99.5474 20.2942   3
  -3   1   6 112.824 19.5816   1
  -3  -1   6 88.3424 19.5270   1
  -3  -1   6 74.6509 17.5017  11
  -3   1   6 82.8339 25.0624  11
   3  -1  -6 85.8070 26.0345  11
   3  -1  -6 31.8582 11.5263  13
   3  -1  -6 36.8612 23.6265   9
   3   1  -6 95.1074 12.1098   9
   3  -1  -6 90.4185 24.5009  10
   3  -1  -5 24861.8 573.308   7
  -3   1   5 24905.4 572.792   7
  -3  -1   5 24443.7 565.886  11
   3  -1  -5 24379.0 564.133  13
  -3   1   5 24280.0 577.012  11
  -3  -1   5 25042.3 573.924  10
  -3   1   5 24780.1 566.717  13
  -3  -1   5 24711.2 564.235  13
   3  -1  -5 24751.1 574.888  10
   3  -1  -5 24524.0 568.754   3
  -3   1   5 24542.7 568.698   1
   3  -1  -5 24480.8 568.504   1
  -3  -1   5 24428.8 568.328   1
   3  -1  -4 20614.5 475.955   7
  -3   1   4 20759.1 474.313   7
  -3  -1   4 20241.2 471.534   1
   3  -1  -4 19526.4 471.446   3
   3  -1  -4 18490.5 470.689   1
  -3   1   4 20712.6 472.320   1
  -3   1   4 20920.8 471.507  13
   3  -1  -4 19519.4 475.478  10
  -3   1   4 20654.8 478.159  11
  -3  -1   4 21069.0 474.195  10
  -3  -1   4 20433.3 465.992  11
   3  -1  -4 20836.3 468.547  13
   3   1  -4 20423.2 466.270  11
  -3  -1   3 945.721 27.7560   5
  -3   1   3 807.485 37.0512   5
   3   1  -3 969.588 27.0500   5
  -3  -1   3 966.062 35.8865   1
  -3   1   3 1024.20 36.5080   1
   3   1  -3 924.174 27.4616  11
  -3   1   3 912.576 37.9173  11
  -3  -1   3 982.103 34.7349  10
  -3   1   3 913.299 34.0525  13
  -3  -1   3 957.566 38.1682   8
   3  -1  -3 926.035 37.6283   8
   3   1  -3 1036.26 28.3537   9
  -3  -1   3 937.446 26.9956   9
  -3   1   2 10.8118 14.0753   5
   3   1  -2 19.8691 9.51506   5
  -3  -1   2 18.8123 11.4106   5
  -3  -1   2 38.2994 15.9121   1
  -3   1   2 25.9197 15.8682   1
   3   1  -2 18.7979 15.8202  12
  -3   1   2 32.1480 13.1759  13
  -3  -1   2 24.5226 10.2940   9
  -3  -1   2 17.7161 15.1905   8
   3   1  -2 20.1615 11.3653   9
   3  -1  -2 7.52040 14.5424   8
  -3  -1   2 20.7221 12.5841  10
  -3  -1   1 19381.9 446.737   5
  -3   1   1 19394.1 449.060   5
  -3   1   1 19596.3 448.394   1
  -3  -1   1 19558.4 447.726   1
  -3   1   1 18977.9 448.619   3
  -3  -1   1 19224.5 440.281  10
   3   1  -1 20013.4 452.074  12
  -3  -1   1 19141.8 445.512   9
  -3  -1   1 18781.3 448.530   8
   3  -1  -1 18627.4 448.498   8
  -3  -1   0 4863.12 124.288   5
   3   1   0 4847.55 123.455   6
   3  -1   0 4951.05 124.103   5
  -3   1   0 4677.66 121.673   1
  -3   1   0 4857.63 116.434  12
   3   1   0 4952.67 126.164  12
  -3   1   0 5132.33 124.586   9
  -3  -1   0 4874.17 123.278   9
   3   1   1 9483.59 229.543   6
   3  -1   1 9779.65 231.004   5
  -3  -1  -1 9375.75 233.277   5
   3  -1   1 9804.61 226.786   1
   3  -1   1 9551.70 226.989   3
   3   1   1 9764.80 233.876  12
   3  -1   1 9089.04 221.425  12
  -3   1  -1 9546.08 230.797   9
  -3  -1  -1 9285.43 231.746   9
   3  -1   2 75.8481 17.0920   3
   3  -1   2 87.4536 16.4251   1
   3  -1   2 95.7073 19.8906   5
   3   1   2 67.7142 16.5997   6
   3   1   2 56.1593 18.9434   5
   3  -1   2 56.2104 19.5071   9
  -3  -1  -2 61.0356 20.4957   9
   3   1   3 1011.26 45.9399   5
   3  -1   3 1003.35 43.4545   5
   3   1   3 1006.00 40.3558   6
   3  -1   3 1048.24 37.3355   3
   3  -1   3 1097.88 37.0163   1
  -3  -1  -3 1028.51 37.1022   1
  -3   1  -3 1001.45 37.4885   1
   3   1   3 1022.57 31.0139  10
  -3  -1  -3 1018.53 46.5713   9
   3  -1   3 984.248 44.0353   9
   3  -1   4 7442.18 187.587   5
   3   1   4 7210.01 190.596   5
   3  -1   4 7221.56 176.882   3
  -3  -1  -4 7212.19 176.732   1
   3  -1   4 7382.57 176.946   1
  -3   1  -4 7635.97 178.323   1
   3   1   4 7263.24 174.575  10
   3  -1   4 7173.70 188.495   9
  -3   1  -5 6826.61 186.551   5
   3   1   5 7312.43 190.603   5
   3  -1   5 7051.99 186.232   5
  -3  -1  -5 7145.04 173.162   1
   3  -1   5 7222.82 173.571   1
  -3   1  -5 7413.07 174.644   1
   3   1   5 7019.73 174.532  10
   3  -1   5 7030.55 187.746   9
   3   1   5 7024.73 193.707   9
  -3   1  -5 6652.54 186.394   9
   3   1   6 3229.76 104.279   5
   3  -1   6 3086.54 100.125   5
  -3   1  -6 3224.04 87.8724   2
  -3  -1  -6 3034.02 90.9342   4
  -3  -1  -6 3206.29 85.2696   1
   3  -1   6 3228.34 85.6109   1
   3   1   6 3213.28 90.1318  10
   3  -1   6 3069.84 102.467   9
   3   1   6 3191.19 107.862   9
  -3   1  -6 3300.94 102.723   9
   3  -1   7 49.6850 19.2500   1
  -3   1  -7 24.3127 18.0269   2
  -3  -1  -7 61.9412 20.7516   4
  -3  -1  -7 77.0113 19.2985   1
   3   1   7 31.3884 35.9221   5
   3  -1   7 59.7431 33.2792   5
  -3   1  -7 76.7375 34.7922   9
  -3  -1  -7 15.6761 36.5498   9
   3  -1   7 28.5062 34.4333   9
   3   1   7 50.2280 26.8309  10
   3   1   7 42.3878 38.8290   9
  -3  -1  -8-7.32600 17.9560   4
  -3  -1  -8 23.6717 17.7172   3
   3  -1   8 29.0945 16.8586   1
  -3   1  -8 17.0591 17.6508   2
  -3  -1  -8 24.9337 17.0158   1
   3  -1   8 11.4240 34.4077   5
   3   1   8 12.7472 36.9921   5
   3  -1   8 7.76084 38.1987   9
   3   1   8 49.0600 43.1500   9
  -3  -1  -8 11.1918 36.6739   9
   3   1   8 22.4226 28.9793  10
  -3   1  -8 7.48471 35.9855   9
   3   1   9 5866.66 170.299   5
   3  -1   9 5848.60 165.933   5
  -3   1  -9 5808.00 171.342   5
   3  -1   9 5489.71 137.302   1
  -3  -1  -9 5650.54 137.400   3
  -3   1  -9 5768.20 141.475   2
  -3  -1  -9 5820.26 137.147   1
  -3  -1  -9 5490.12 141.000   4
   3  -1   9 6050.85 158.667  10
   3  -1   9 5737.86 170.103   9
  -3  -1  -9 6017.73 173.756   9
   3   1   9 5854.97 177.336   9
  -3   1  -9 6193.81 170.538   9
  -3   1 -10 0.53808 13.9899   4
  -3   1 -10-28.5417 45.5326   5
   3  -1  10 40.8970 43.4701   5
   3   1  10 62.2137 48.7635   5
  -3  -1 -10 12.5080 45.1002   9
   3  -1  10 36.0757 46.9840   9
   3   1  10-27.7926 38.4331  10
   3  -1  10 40.4324 39.2688  10
   3   1  10 27.8595 51.3452   9
  -3   1 -10 2.80243 42.3166   9
   3   1  11 1856.59 85.5389   5
   3  -1  11 1771.93 81.9493   5
  -3   1 -11 1617.53 86.6517   5
   3  -1  11 1776.50 77.6865  10
   3   1  11 1690.27 74.7445  10
  -3  -1 -11 1733.90 88.0268   9
   3  -1  11 1855.91 90.0248   9
   3   1  11 1708.81 94.1132   9
  -3   1 -11 1817.33 85.2696   9
   3   1  11 1749.58 92.0267   7
   3   1  12 6064.19 184.738   5
   3  -1  12 6167.40 181.866   5
   3  -1  12 6162.09 176.373  10
   3   1  12 6373.63 176.776  10
   3   1  12 6269.36 197.348   7
   3   1  12 5967.07 196.390   9
   3  -1  12 6312.85 190.979   9
  -3  -1 -12 6187.86 189.589   9
  -3   1 -12 6431.39 186.765   9
   3   1  13 746.440 69.4993   5
   3  -1  13 856.595 68.0443   5
   3   1  13 827.840 63.1962  10
  -3   1 -13 891.545 64.4893  13
   3  -1  13 759.196 74.5095   9
   3   1  13 827.989 77.5099   7
  -3  -1 -13 781.860 73.3182   9
  -3   1 -13 856.135 70.7204   9
   3  -1  13 655.724 62.7032  10
   3   1  13 875.384 80.7502   9
   3   1  14 239.089 68.2997   7
   3  -1  14 477.534 60.2131   5
   3   1  14 329.497 62.0730   5
  -3   1 -14 280.616 55.5834  13
  -3   1 -14 382.980 64.8208   9
   3  -1  14 274.956 67.4272   9
   3   1  14 208.675 70.7383   9
   3   1  14 316.902 58.3082  10
  -3  -1 -14 300.953 69.3989   9
   3  -1  14 371.718 59.4519  10
   3   1  15 93.9660 62.8038   5
   3   1  15 79.5453 66.1988   7
   3  -1  15 166.237 59.5222   5
  -3   1 -15 88.7566 53.7134  13
   3   1  15-29.9105 59.5806  10
   3   1  15 25.8913 71.1525   9
  -3  -1 -15 79.9784 65.9808   9
   3  -1  15 117.452 57.9554  10
   3  -1  15 19.2760 66.6379   9
  -3   1 -15 71.0685 61.5637   9
   3  -1  16 596.683 69.3059   5
   3  -1  16 689.484 79.7776   7
   3   1  16 687.068 87.2033   7
   3   1  16 700.850 75.7360   5
  -3   1 -16 612.498 67.0997  13
  -3   1 -16 686.955 74.5863   9
   3  -1  16 759.916 70.8844  10
  -3  -1 -16 660.731 79.4582   9
   3  -1  16 563.442 83.3478   9
   3   1  16 695.451 88.9783   9
   3   1  16 595.334 70.9879  10
  -3   2  17 370.994 65.2089   7
  -3   2  17 421.544 62.0825   5
  -3  -2  17 400.490 64.3094  11
  -3   2  17 374.468 74.9618  11
   3  -2 -17 378.442 66.7197   9
   3   2 -17 382.662 42.6189   9
  -3   2  16 300.121 59.8480   5
  -3  -2  16 207.732 38.7879   5
  -3  -2  16 271.056 42.6131   7
  -3   2  16 269.617 59.3483   7
  -3   2  16 242.328 67.3324  11
  -3  -2  16 329.461 56.7414  11
   3  -2 -16 232.783 63.4318   9
   3   2 -16 258.000 39.0389   9
  -3  -2  15 1377.67 57.6821   5
  -3   2  15 1597.23 84.1328   7
  -3   2  15 1511.99 81.9650   5
  -3  -2  15 1486.91 61.8257   7
  -3  -2  15 1673.62 89.0362  10
  -3  -2  15 1442.86 76.1386  11
   3  -2 -15 1193.82 44.9470  13
   3  -2 -15 1662.66 89.3187  10
  -3   2  15 1512.91 90.2051  11
   3  -2 -15 1434.88 86.0837   9
   3   2 -15 1537.12 59.3337   9
  -3   2  14 236.823 57.1984   7
  -3  -2  14 269.476 34.9031   7
  -3  -2  14 177.292 32.7775   5
  -3   2  14 151.154 54.6240   5
  -3  -2  14 216.850 48.0616  11
   3  -2 -14 212.223 27.7166  13
  -3   2  14 260.308 60.5211  11
   3  -2 -14 290.415 56.1384   9
   3  -2 -14 282.099 59.5972  10
   3   2 -14 254.212 34.9566   9
  -3  -2  13 1107.18 47.6273   5
  -3   2  13 1392.20 72.3778   7
  -3   2  13 1169.25 74.4928   5
  -3  -2  13 1100.13 36.3290   2
  -3   2  13 1148.27 35.3132   4
   3  -2 -13 1149.88 35.1480   1
  -3  -2  13 1143.42 34.7388   1
   3  -2 -13 1420.48 75.2200  10
  -3  -2  13 1367.65 66.9857  11
   3  -2 -13 1336.64 48.6377  13
  -3   2  13 1288.85 79.0117  11
   3  -2 -13 1315.46 74.1130   9
  -3  -2  13 1325.56 51.6417   7
   3   2 -13 1395.24 50.2878   9
  -3  -2  12 637.604 36.5428   5
  -3   2  12 806.477 59.6564   7
  -3   2  12 844.235 62.4530   5
  -3  -2  12 757.615 31.6206   1
   3  -2 -12 769.544 31.9849   1
  -3  -2  12 735.118 32.0061   3
  -3  -2  12 846.751 35.7785   2
  -3   2  12 731.515 34.1929   4
   3  -2 -12 854.519 62.6785  10
  -3  -2  12 734.518 53.1508  11
   3  -2 -12 702.741 38.2407  13
  -3   2  12 783.816 66.0439  11
   3   2 -12 859.508 38.9061   9
  -3  -2  12 779.544 39.5797   7
   3  -2 -12 875.944 64.9183   9
  -3  -2  11 7078.98 187.458   5
  -3   2  11 8462.43 216.871   7
  -3  -2  11 7885.97 193.953   4
   3  -2 -11 7895.25 188.720   1
  -3  -2  11 7594.68 188.332   1
  -3  -2  11 7362.98 210.986  10
   3  -2 -11 8260.35 214.171  10
  -3   2  11 8139.66 222.640  11
   3  -2 -11 7588.99 194.428  13
  -3  -2  11 8179.06 206.029  11
   3   2 -11 7490.57 189.598  13
   3  -2 -11 8314.50 219.695   9
   3   2 -11 8174.87 189.537   9
  -3  -2  11 7623.19 190.930   7
  -3  -2  10 707.521 30.2523   5
  -3   2  10 822.815 54.8002   7
  -3  -2  10 777.950 35.6254   1
  -3   2  10 710.640 38.1252   2
   3  -2 -10 775.653 36.4089   1
  -3  -2  10 799.959 40.2804   4
   3  -2 -10 784.461 36.2827   3
   3  -2 -10 794.521 54.8936  10
   3  -2 -10 678.889 36.6754  13
  -3  -2  10 898.729 56.0180  10
   3   2 -10 814.932 35.0142  13
  -3   2  10 829.061 58.6048  11
  -3  -2  10 820.889 46.7468  11
  -3  -2  10 781.600 33.1403   7
   3   2 -10 789.246 31.4933   9
   3  -2 -10 732.290 56.3413   9
  -3   2   9 4405.44 131.034   7
  -3  -2   9 3883.63 104.678   5
  -3  -2   9 4323.45 118.848   4
   3  -2  -9 4361.93 112.686   1
  -3   2   9 4413.27 117.518   2
  -3  -2   9 4415.77 112.661   1
   3  -2  -9 4436.61 113.268   3
  -3   2   9 4388.59 135.983  11
  -3  -2   9 4511.45 130.032  10
  -3  -2   9 4554.44 120.295  11
   3  -2  -9 4472.05 129.609  10
   3  -2  -9 4495.48 117.770  13
  -3  -2   9 4177.85 107.809   7
   3   2  -9 4328.39 105.319   9
   3  -2  -9 4354.79 134.020   9
   3  -2  -9 4439.70 129.800   7
  -3   2   8 924.418 51.7337   7
  -3  -2   8 802.500 25.4875   5
  -3  -2   8 945.980 38.3620   1
  -3  -2   8 887.423 43.7279   4
   3  -2  -8 986.517 39.3655   3
  -3   2   8 940.348 41.0727   2
   3  -2  -8 1001.75 39.2114   1
  -3   2   8 915.973 53.6641  11
   3  -2  -8 913.958 40.9695  13
  -3  -2   8 906.874 39.3748  11
   3  -2  -8 1113.39 51.9064  10
   3  -2  -8 983.755 53.3275   9
   3  -2  -8 955.189 50.4093   7
  -3   2   7 3544.38 108.181   7
   3  -2  -7 3548.10 96.5831   3
   3  -2  -7 3556.78 96.1905   1
  -3  -2   7 3483.21 103.512   4
  -3   2   7 3543.08 100.157   2
  -3  -2   7 3704.17 96.8425   1
  -3   2   7 3339.53 110.822  11
   3  -2  -7 3103.76 110.128  11
  -3  -2   7 3431.23 93.9866  13
  -3  -2   7 3522.51 93.6860  11
   3  -2  -7 3681.49 106.936  10
   3  -2  -7 3506.33 99.4816  13
  -3   2   7 3783.32 107.718   8
   3  -2  -7 3516.77 111.629   9
   3  -2  -7 3423.02 107.234   7
   3  -2  -6 8410.32 215.787   7
  -3   2   6 8305.12 215.340   7
   3  -2  -6 8239.05 204.018   1
  -3  -2   6 8450.13 204.211   1
  -3   2   6 8434.96 208.088   2
   3  -2  -6 8165.34 204.181   3
  -3  -2   6 8246.64 213.096   4
  -3  -2   6 8373.66 210.968  10
  -3   2   6 8403.66 217.940  11
  -3  -2   6 8346.26 204.906  13
  -3  -2   6 8036.44 197.221  11
   3  -2  -6 8094.89 206.922  13
   3  -2  -6 8784.42 213.321  10
  -3   2   6 8680.72 212.924   8
   3  -2  -6 8774.77 219.915   9
  -3  -2   5 30634.6 715.955   6
  -3   2   5 31043.6 711.952   7
   3  -2  -5 30986.9 712.414   7
  -3  -2   5 29995.4 711.741   4
  -3  -2   5 30387.7 702.208   1
  -3   2   5 30356.0 706.544   2
   3  -2  -5 30557.3 702.525   1
   3  -2  -5 30180.3 705.664  13
  -3  -2   5 30752.8 711.754  12
  -3   2   5 30519.1 713.975  11
  -3  -2   5 31075.1 706.157  13
  -3  -2   5 29982.9 691.201  11
  -3   2   5 30846.5 708.566  13
  -3  -2   5 29982.1 705.843  10
  -3   2   5 30684.5 707.599   8
   3  -2  -5 30271.9 709.478  10
  -3  -2   4 13682.0 322.806   6
   3  -2  -4 12473.6 318.982   7
  -3   2   4 13458.7 319.372   7
   3   2  -4 12841.6 302.501   7
  -3   2   4 13236.4 315.799   2
   3  -2  -4 12032.0 310.601   1
  -3  -2   4 12507.3 320.265   4
  -3  -2   4 13154.3 318.488  12
  -3  -2   4 13309.1 316.572  13
   3  -2  -4 13023.3 315.297  13
  -3  -2   4 13244.7 312.400  10
  -3   2   4 13331.8 317.909  13
  -3   2   4 13443.8 320.967  11
  -3  -2   4 13371.0 302.615   7
  -3   2   4 13623.5 314.635   8
   3  -2  -4 13262.4 313.738   8
  -3  -2   4 13032.7 316.851   8
   3   2  -3 8377.34 201.539   7
   3   2  -3 8586.76 197.778   5
  -3  -2   3 8457.43 216.520   4
  -3   2   3 8428.96 210.871   2
  -3  -2   3 8540.04 213.024  12
  -3   2   3 8648.39 214.243  13
   3  -2  -3 8530.62 210.797  13
  -3   2   3 8669.95 214.114  11
  -3  -2   3 8338.76 197.941   9
  -3   2   3 8386.73 207.102   8
  -3  -2   3 8437.02 209.515   8
   3  -2  -3 8258.68 206.983   8
   3   2  -3 8471.79 198.902   9
  -3   2   2 9058.10 233.828   5
   3   2  -2 9569.86 222.221   5
   3   2  -2 9586.54 233.840   6
  -3  -2   2 9229.50 236.683   4
  -3   2   2 9663.73 232.066   2
   3   2  -2 8635.76 231.361  12
  -3   2   2 9567.78 234.890  13
   3  -2  -2 8889.63 232.679  11
  -3  -2   2 9415.15 227.018   8
   3  -2  -2 9708.58 227.019   8
   3   2  -2 9199.90 225.110   7
  -3  -2   2 9358.17 222.268   9
   3   2  -2 9385.19 223.202   9
   3   2  -1 289.697 21.9137   5
   3   2  -1 288.728 25.3956   6
   3  -2  -1 240.429 25.8030   5
  -3   2   1 313.615 25.3499   2
   3   2  -1 294.669 26.1985  12
   3  -2  -1 272.816 24.2648  11
  -3   2   1 220.423 24.8582  13
   3   2  -1 304.596 21.7237   8
   3   2  -1 318.554 23.5689   9
   3   2  -1 279.373 23.8456   7
  -3  -2   1 256.320 21.5173   9
  -3  -2   1 312.285 20.1835   8
   3  -2  -1 308.663 20.9265   8
   3   2   0 4176.53 116.394   6
   3  -2   0 4231.75 115.319   5
  -3   2   0 3935.83 114.040   2
  -3   2   0 4429.31 119.814  13
   3   2   0 4166.97 117.554  12
  -3  -2   0 4179.75 113.321   9
   3   2   0 4248.00 108.161   8
   3   2   1 2080.82 68.8600   6
   3  -2   1 2094.21 66.0373   5
   3  -2   1 2098.67 62.8906   1
   3   2   1 1998.06 69.4069  12
  -3   2  -1 1988.75 69.4854  13
  -3  -2  -1 1957.03 67.4031   9
   3  -2   1 2021.17 64.9580   9
   3   2   2 1878.18 66.1313   6
   3  -2   2 1936.40 63.8393   5
   3  -2   2 1908.03 59.4080   1
  -3   2  -2 1780.54 66.9121  13
  -3  -2  -2 1880.47 47.8847  10
  -3  -2  -2 1875.35 67.5324   9
   3  -2   2 1794.36 61.9522   9
   3  -2   3 30289.7 713.662   5
   3   2   3 31077.5 717.876   6
   3   2   3 30577.1 719.296   5
   3  -2   3 30312.7 706.414   1
  -3   2  -3 30658.7 711.624   2
  -3  -2  -3 30336.3 716.511   4
  -3  -2  -3 30714.2 697.279  10
  -3  -2  -3 31178.9 720.581   9
   3  -2   3 30331.6 712.471   9
  -3   2  -4 215.487 28.2549   5
   3  -2   4 246.966 31.6451   5
   3  -2   4 199.157 22.6381   3
  -3   2  -4 255.575 26.7161   2
  -3  -2  -4 249.443 25.4176   1
   3   2   4 202.938 34.4721   5
  -3  -2  -4 196.747 29.3010   4
   3  -2   4 223.165 23.9110   1
  -3  -2  -4 230.524 17.7684  10
   3  -2   4 200.853 30.8577   9
  -3  -2  -4 233.680 32.6460   9
  -3   2  -4 283.558 30.6513   9
  -3   2  -5 684.118 41.5101   5
   3  -2   5 683.163 43.3535   5
   3   2   5 644.125 45.6906   5
   3  -2   5 633.858 31.8723   1
  -3  -2  -5 699.898 33.6694   1
  -3   2  -5 652.798 36.1828   2
   3  -2   5 677.105 32.9270   3
  -3  -2  -5 644.964 37.9301   4
  -3   2  -5 802.501 48.0335  13
  -3  -2  -5 684.896 29.3842  10
  -3   2  -5 608.589 41.5027   9
  -3  -2  -5 547.262 46.7180   9
   3  -2   5 633.678 42.8844   9
   3  -2   6 2297.30 59.0365   6
   3   2   6 2287.42 88.4576   5
   3  -2   6 2250.79 81.1428   5
   3  -2   6 2248.15 66.7537   1
  -3  -2  -6 2271.28 67.6234   1
  -3   2  -6 2261.69 72.7345   2
   3  -2   6 2266.08 67.4029   3
  -3  -2  -6 2208.69 74.1365   4
  -3  -2  -6 2282.94 68.0366  10
  -3   2  -6 2329.79 87.3026  13
   3   2   6 2340.43 90.9026   7
  -3   2  -6 2316.83 81.8859   9
   3   2   6 2357.04 91.5696   9
   3  -2   6 2320.82 81.7413   9
   3  -2   7 13614.4 339.085   5
   3  -2   7 13500.8 316.223   6
   3   2   7 13759.7 347.300   5
  -3  -2  -7 13342.7 320.735   1
  -3   2  -7 13979.4 327.854   2
  -3  -2  -7 13183.0 328.147   4
   3  -2   7 13585.7 320.826   3
   3  -2   7 13837.9 320.901   1
  -3   2  -7 13967.1 347.771  13
   3   2   7 13404.6 352.111   7
   3   2   7 13318.0 351.428   9
   3  -2   7 13799.5 339.866   9
  -3   2  -7 13494.7 339.830   9
   3  -2   8 59.2719 37.0559   5
   3   2   8 65.4050 43.8727   7
   3  -2   8 16.1368 17.9978   6
   3   2   8 35.0491 41.6829   5
  -3  -2  -8 30.5158 22.4188   4
  -3  -2  -8-8.97697 20.6422   1
   3  -2   8 38.2693 21.9078   3
   3  -2   8 41.3944 21.1038   1
  -3   2  -8 1.35508 22.2397   2
  -3   2  -8 20.5582 33.8004  13
   3   2   8 1.68285 30.9114  10
   3   2   8 20.1993 45.9347   9
   3  -2   8-12.2377 37.9100   9
  -3  -2  -8 37.5947 42.6033   9
  -3   2  -8 24.8097 36.1595   9
  -3   2  -9 613.629 54.5990   5
   3   2   9 497.809 60.1747   7
   3   2   9 560.190 56.2215   5
   3  -2   9 521.951 50.2575   5
   3  -2   9 497.537 29.7017   6
  -3  -2  -9 504.695 31.9566   4
   3  -2   9 500.324 29.4917   1
  -3  -2  -9 464.015 29.2872   1
  -3   2  -9 485.430 32.7354   2
  -3   2  -9 571.807 52.0408  13
  -3  -2  -9 521.200 59.2962   9
  -3   2  -9 493.627 50.3785   9
   3  -2   9 544.364 52.2468   9
   3   2   9 542.022 61.7188   9
   3  -2  10 34.5552 23.5547   6
   3  -2  10 108.863 44.6792   5
   3   2  10 34.4127 48.3389   5
   3   2  10 77.4366 54.1508   7
   3  -2  10 54.4067 20.7407   1
  -3   2 -10 72.5868 45.9092   5
  -3  -2 -10 59.7082 20.6393   1
  -3  -2 -10 22.4851 21.1753   2
  -3   2 -10 43.0875 22.4093   4
  -3   2 -10 57.7539 43.5698  13
   3  -2  10 75.4207 44.6779  10
   3   2  10-7.55182 54.0599   9
  -3  -2 -10 134.152 54.3168   9
   3  -2  10 62.5671 48.2217   9
  -3   2 -10 19.5079 44.3953   9
   3  -2  11-8.35437 25.4597   6
   3   2  11 16.1268 52.3092   5
   3  -2  11-8.33905 46.5573   5
   3   2  11 4.06450 56.3817   7
  -3   2 -11-19.0061 49.9513   5
  -3  -2 -11 57.4978 16.3035   1
  -3  -2 -11 36.8248 16.2333   3
   3  -2  11 25.9883 15.9189   1
  -3  -2 -11 14.8029 16.8319   2
  -3   2 -11 34.6906 18.9354   4
  -3   2 -11 59.5965 46.3748  13
  -3  -2 -11 107.095 55.5801   9
   3   2  11-20.5912 47.5385  10
  -3   2 -11 5.82411 47.6755   9
   3   2  11-27.7248 58.2321   9
   3  -2  11 81.4570 48.8131   9
   3  -2  11 69.9853 45.8406  10
   3  -2  12 72.1245 50.7892   5
   3  -2  12 27.0432 28.5842   6
   3   2  12 4.26305 60.7478   7
   3   2  12 13.2156 53.3944   5
  -3   2 -12-16.6977 55.2463   5
  -3   2 -12 99.4016 47.8595  13
   3  -2  12 58.7839 49.1722  10
  -3   2 -12 57.2333 50.3429   9
  -3  -2 -12 11.0437 55.3636   9
   3  -2  12 108.999 55.0547   9
   3   2  12-31.5666 51.1808  10
   3   2  12 78.5632 59.6428   9
   3   2  13 262.373 67.0481   7
   3  -2  13 182.054 56.3276   5
   3  -2  13 137.341 32.8698   6
   3   2  13 297.078 64.2749   5
  -3   2 -13 75.6443 58.4236   5
  -3   2 -13 247.837 56.7481  13
   3   2  13 244.827 69.1601   9
   3  -2  13 276.498 57.1514  10
   3  -2  13 336.780 63.3997   9
  -3  -2 -13 242.625 64.8622   9
  -3   2 -13 300.568 62.1944   9
   3   2  14 732.353 75.0067   5
   3  -2  14 613.126 44.2274   6
   3   2  14 725.326 83.8976   7
   3  -2  14 888.072 73.2417   5
  -3   2 -14 852.582 70.2485  13
  -3  -2 -14 833.793 80.6526   9
   3  -2  14 839.363 76.8804   9
   3  -2  14 838.297 70.4516  10
   3   2  14 813.124 85.3121   9
  -3   2 -14 653.061 70.3904   9
   3   2  15 89.7969 64.0847   5
   3  -2  15 85.3251 59.5894   5
   3   2  15 37.7167 69.5207   7
  -3   2 -15 25.4090 55.4928  13
   3   2  15 9.12131 70.4592   9
  -3  -2 -15 94.4850 69.6547   9
   3  -2  15 13.9962 59.2105  10
   3  -2  15-18.2351 63.4892   9
  -3   2 -15 105.191 59.7355   9
   3   2  16 159.013 75.3320   7
   3  -2  16 80.5291 63.8807   5
  -3   2 -16 18.2299 58.9482  13
  -3  -2 -16 107.661 75.1349   9
  -3   2 -16 191.973 64.8974   9
   3  -2  16-3.76278 70.0894   9
  -3  -3  17 266.555 70.9025   6
  -3   3  17 179.368 68.2715   7
  -3   3  17 255.832 66.8647   5
   3  -3 -17 180.162 25.9361  13
   3  -3 -17 288.997 72.5886   9
  -3  -3  16 406.487 71.6708   6
  -3   3  16 466.056 70.2691   7
  -3  -3  16 392.843 39.3756   7
  -3   3  16 416.925 67.8201   5
  -3  -3  16 362.789 54.7761  11
  -3   3  16 377.471 73.3212  11
   3  -3 -16 406.488 35.4664  13
   3  -3 -16 433.783 72.9421  10
   3  -3 -16 469.508 75.0579   9
  -3   3  15 98.9134 57.4796   7
  -3  -3  15 79.5994 60.0722   6
  -3  -3  15 26.6467 31.1253   7
  -3  -3  15 40.5848 27.0857   5
  -3   3  15 7.13880 62.3902   5
  -3  -3  15 43.9616 47.7658  11
   3  -3 -15 28.8144 31.6926  13
  -3   3  15 46.0706 63.9368  11
   3  -3 -15 21.7564 61.3198  10
   3  -3 -15 32.7248 57.6264   9
  -3   3  14 1358.84 80.8779   7
  -3  -3  14 1246.03 83.3247   6
  -3   3  14 1372.40 84.5566   5
  -3  -3  14 1043.34 41.8930   5
  -3  -3  14 969.883 38.6838   3
  -3  -3  14 1159.15 40.8658   2
  -3  -3  14 1025.32 38.3650   1
   3  -3 -14 1050.53 39.1938   1
  -3   3  14 1167.68 42.2060   4
   3  -3 -14 1257.16 80.3795  10
   3  -3 -14 1251.82 56.2143  13
  -3  -3  14 1138.45 65.4093  11
  -3   3  14 1215.04 84.6820  11
   3  -3 -14 1336.06 84.3370   9
  -3  -3  14 1206.62 48.8220   7
  -3  -3  13 1688.19 94.2013   6
  -3  -3  13 1551.61 53.3948   5
  -3   3  13 1966.68 93.2131   7
  -3  -3  13 1804.13 60.9124   2
   3  -3 -13 1901.72 58.4397   1
  -3   3  13 1997.92 95.5816   5
  -3  -3  13 1718.69 57.2967   1
  -3   3  13 1765.52 61.5543   4
   3  -3 -13 1921.45 88.5031  10
   3  -3 -13 1874.30 71.4878  13
  -3   3  13 2003.64 98.3325  11
  -3  -3  13 1920.48 76.4891  11
  -3  -3  13 1824.03 60.8962   7
   3  -3 -13 1948.07 94.7298   9
  -3  -3  12 3662.11 103.333   5
  -3  -3  12 4144.04 144.751   6
  -3   3  12 4378.14 142.650   7
   3  -3 -12 4100.48 110.437   1
  -3   3  12 4323.81 117.534   4
  -3  -3  12 4310.69 117.350   2
  -3  -3  12 4208.39 110.647   1
   3  -3 -12 4233.04 111.306   3
  -3   3  12 4351.13 146.857  11
  -3  -3  12 4302.78 124.876  11
   3  -3 -12 4297.32 123.841  13
   3  -3 -12 4535.16 138.496  10
  -3  -3  12 4148.52 135.900  10
   3   3 -12 4410.97 119.565  13
  -3  -3  12 3954.25 109.683   7
   3  -3 -12 4566.44 146.425   9
  -3  -3  11 290.161 20.7698   5
  -3  -3  11 482.652 59.4235   6
  -3   3  11 359.118 51.1016   7
   3  -3 -11 380.079 32.8064   1
  -3   3  11 408.767 35.4909   4
   3  -3 -11 310.430 31.4484   3
  -3  -3  11 365.521 32.1498   1
  -3   3  11 425.654 55.8196  11
   3   3 -11 365.221 34.8615  13
   3  -3 -11 345.052 37.0935  13
  -3  -3  11 382.913 38.3203  11
  -3  -3  11 403.523 52.6994  10
   3  -3 -11 361.666 55.0870   9
   3  -3 -11 419.534 52.6251  10
  -3   3  10 315.689 47.9402   7
   3  -3 -10 307.511 46.5323   7
  -3  -3  10 351.185 53.7556   6
   3  -3 -10 274.488 31.6389   3
   3  -3 -10 386.246 31.9773   1
  -3  -3  10 303.479 31.8498   1
  -3  -3  10 298.601 35.6261   4
   3  -3 -10 283.846 35.5371  13
  -3   3  10 335.690 52.0729  11
   3   3 -10 310.066 35.1269  13
  -3   3  10 256.381 44.0849   8
   3  -3 -10 433.732 48.8031  10
  -3  -3  10 332.209 48.7943  10
   3  -3 -10 290.441 49.8803   9
  -3  -3   9 920.556 61.0540   6
  -3   3   9 921.978 59.4357   7
  -3  -3   9 734.945 33.1270   7
   3  -3  -9 789.351 42.4232   3
  -3  -3   9 917.426 42.4261   1
   3  -3  -9 914.195 42.5296   1
  -3   3   9 849.281 46.1405   2
  -3  -3   9 774.953 46.0438   4
   3  -3  -9 879.556 47.9051  13
  -3   3   9 836.880 58.6027  11
   3  -3  -9 851.061 54.7037  10
   3   3  -9 791.017 45.0487  13
  -3  -3   9 811.965 55.6156  10
  -3  -3   9 844.884 40.3722  13
   3  -3  -9 769.343 57.3735   7
   3  -3  -9 871.052 60.7873   9
  -3  -3   8 823.912 33.1741   7
  -3   3   8 929.819 58.3774   7
  -3  -3   8 970.833 60.7308   6
   3  -3  -8 925.886 43.0359   1
  -3  -3   8 935.665 48.9677   4
  -3   3   8 916.524 46.7259   2
  -3  -3   8 937.539 54.6268  12
  -3   3   8 1013.17 59.5723  11
   3  -3  -8 904.970 53.2628  10
   3  -3  -8 874.984 48.5341  13
  -3  -3   8 811.281 51.8134  10
  -3  -3   8 920.421 43.4427  13
   3  -3  -8 834.602 57.8437   9
   3  -3  -8 949.179 58.2349   7
  -3  -3   7 5522.86 159.632   6
  -3   3   7 5424.35 157.661   7
   3  -3  -7 5559.63 158.417   7
  -3  -3   7 5378.75 133.155   7
   3  -3  -7 5300.02 142.489   1
  -3  -3   7 5380.69 149.921   4
  -3   3   7 5234.97 147.518   2
  -3  -3   7 5406.47 152.957  12
  -3  -3   7 5320.49 149.386  10
  -3   3   7 5380.17 158.717  11
   3  -3  -7 5631.07 152.060  10
  -3  -3   7 5079.03 145.013  13
   3  -3  -7 5271.26 151.099  13
   3  -3  -7 5539.56 161.044   9
  -3   3   7 5442.01 147.737   8
  -3  -3   6 891.651 54.2620   6
  -3  -3   6 916.669 33.2478   7
   3  -3  -6 868.543 52.8055   7
  -3   3   6 947.229 53.3095   7
   3  -3  -6 910.474 43.4108   1
  -3   3   6 894.296 46.2125   2
  -3  -3   6 947.966 50.3966   4
  -3   3   6 764.181 49.4993  11
  -3  -3   6 858.598 48.2263  12
   3  -3  -6 877.194 47.6047  13
  -3  -3   6 897.528 45.4905  13
   3  -3  -6 860.646 47.1683  10
  -3   3   6 1035.91 44.6129   8
   3  -3  -6 882.318 53.9671   9
  -3  -3   5 28494.9 651.672   7
   3   3  -5 27972.9 642.582   5
  -3   3   5 28341.9 671.164   7
  -3  -3   5 28665.9 673.204   6
   3  -3  -5 28272.4 672.210   7
   3  -3  -5 28256.6 659.889   1
  -3  -3   5 27778.2 669.206   4
  -3   3   5 29042.4 665.829   2
  -3  -3   5 28334.4 667.835  13
   3  -3  -5 28192.8 667.851  13
  -3   3   5 29516.6 671.180  13
  -3  -3   5 27563.6 665.792  12
  -3  -3   5 28394.9 643.784   9
  -3   3   5 28215.0 658.046   8
  -3  -3   4 12313.7 315.687   6
  -3   3   4 12544.3 313.512   7
   3   3  -4 12665.5 297.778   7
  -3  -3   4 12517.3 314.076   4
  -3   3   4 12723.2 309.893   2
   3  -3  -4 11551.1 303.129   1
  -3  -3   4 12457.1 309.767  12
   3  -3  -4 12446.2 311.486  13
  -3  -3   4 12562.0 313.440  13
  -3   3   4 12630.3 314.843  13
   3  -3  -4 12347.6 314.587  11
  -3  -3   4 12558.0 297.589   7
   3  -3  -4 12257.1 299.389   8
  -3  -3   4 12958.9 292.467   9
  -3   3   4 12790.8 300.559   8
  -3  -3   4 12399.4 304.736   8
   3   3  -3 296.473 25.1999   7
  -3  -3   3 327.550 34.8531   6
  -3  -3   3 391.535 34.9079   4
  -3   3   3 349.687 30.8121   2
  -3   3   3 313.823 31.3544  13
   3  -3  -3 311.799 31.6375  13
  -3  -3   3 320.022 31.7472  12
   3  -3  -3 271.588 30.3951  11
  -3  -3   3 369.264 34.9015  13
  -3  -3   3 299.302 26.3269   8
  -3  -3   3 307.760 21.4457   9
  -3  -3   3 337.843 24.8677   7
   3  -3  -3 322.963 23.6377   8
  -3   3   3 297.437 22.1436   8
   3   3  -2 4726.16 128.468   7
   3   3  -2 4740.47 135.431   6
  -3   3   2 4505.79 133.244   2
  -3  -3   2 4757.72 138.357   4
  -3  -3   2 4766.22 133.992  12
   3  -3  -2 4794.35 134.191  11
   3   3  -2 4765.86 116.947  11
  -3   3   2 4862.71 140.320  13
  -3  -3   2 4623.20 123.661   8
  -3  -3   2 4791.21 124.524   9
  -3  -3   2 4936.96 127.653   7
   3  -3  -2 4801.88 122.877   8
   3   3  -2 4843.16 125.620   9
   3   3  -1 25729.6 600.898   6
   3   3  -1 25026.1 595.600   7
   3  -3  -1 24998.1 599.737   7
  -3   3   1 24297.7 597.769   2
   3   3  -1 26486.0 605.344   4
  -3  -3   1 25561.7 598.887  12
  -3   3   1 25446.1 605.674  13
   3  -3  -1 24823.0 597.190  11
   3   3  -1 25556.3 584.866  11
   3   3  -1 25205.5 592.081   9
  -3  -3   1 25543.8 593.342   7
  -3  -3   1 24515.9 591.237   9
   3   3  -1 25607.4 585.337   8
  -3  -3   1 25348.7 584.760   8
  -3  -3   0 79.3963 23.9661   7
   3   3   0 92.7005 26.4836   6
   3   3   0 134.320 25.6390   5
  -3   3   0 90.8090 24.1921   2
   3   3   0 84.2411 27.3913   4
   3   3   0 108.229 20.6130  11
   3  -3   0 59.7771 22.9627  11
  -3   3   0 125.851 28.0750  13
   3   3   0 103.893 25.7523   9
   3   3   0 89.5742 16.9644   8
  -3  -3   0 93.4495 23.7275   9
   3  -3   1 17084.4 416.105   5
   3   3   1 17569.1 419.953   6
   3   3   1 17974.9 422.158   4
   3  -3   1 17270.3 410.193   1
   3   3   1 16885.4 418.927  12
  -3   3  -1 17134.8 423.693  13
   3  -3   1 17205.6 411.340   9
  -3  -3  -1 16911.1 415.633   9
   3   3   1 17067.4 400.767   8
   3   3   2 615.614 44.9644   6
  -3   3  -2 740.495 34.0604   6
   3  -3   2 676.730 41.6842   5
  -3  -3  -2 654.693 44.8118   4
   3  -3   2 751.025 39.8206   1
  -3   3  -2 657.938 44.8641  13
   3  -3   2 794.588 40.6778   9
  -3  -3  -2 751.615 43.9131   9
  -3   3  -3 388.795 34.7300   2
   3  -3   3 386.628 31.8417   1
  -3  -3  -3 362.530 34.6176   4
   3  -3   3 382.554 34.8089   5
  -3   3  -3 397.675 24.1254   6
  -3   3  -3 395.645 34.1473   5
   3   3   3 352.449 39.5084   6
  -3  -3  -3 328.240 37.6366   9
   3  -3   3 387.244 33.6151   9
  -3   3  -4 5994.34 151.838   6
  -3   3  -4 6305.10 166.313   5
   3   3   4 6474.54 179.022   5
   3   3   4 6282.15 176.538   6
   3  -3   4 6258.35 169.106   5
  -3   3  -4 6176.80 168.644   2
  -3  -3  -4 5939.64 170.159   4
   3  -3   4 6193.20 162.196   1
  -3  -3  -4 6525.72 153.339  10
  -3  -3  -4 6279.11 177.255   9
   3  -3   4 6346.04 166.830   9
   3  -3   5 24466.8 584.428   5
   3   3   5 24284.7 595.949   5
  -3  -3  -5 23729.8 583.898   4
  -3   3  -5 24039.9 582.655   2
   3  -3   5 24880.4 575.036   1
  -3  -3  -5 25020.7 568.400  10
  -3   3  -5 24323.9 596.764  13
  -3  -3  -5 24963.7 596.025   9
  -3   3  -5 24709.1 584.178   9
   3  -3   5 24772.6 582.260   9
   3   3   6 9821.17 263.466   5
   3  -3   6 9926.86 250.957   5
  -3  -3  -6 9210.18 247.057   4
   3  -3   6 9622.82 238.527   1
  -3   3  -6 9957.21 247.909   2
  -3  -3  -6 9919.25 235.325  10
  -3   3  -6 9554.62 262.773  13
  -3  -3  -6 9096.43 260.245   9
   3  -3   6 9908.88 249.213   9
  -3   3  -6 9704.44 250.561   9
   3   3   6 9954.52 266.023   9
   3   3   6 9626.20 266.883   7
   3   3   7 1907.59 87.4605   5
   3  -3   7 1943.41 58.2764   6
   3  -3   7 2071.24 79.9238   5
   3  -3   7 2015.55 64.7936   1
  -3   3  -7 2059.01 73.7125   2
  -3  -3  -7 1964.31 72.4495   4
  -3  -3  -7 1935.82 64.9356   1
  -3  -3  -7 1992.14 64.8131  10
  -3   3  -7 1850.21 86.8713  13
   3  -3   7 2057.16 78.4578   9
  -3   3  -7 1876.03 78.1564   9
   3   3   7 1866.06 90.9840   9
   3   3   7 1969.18 92.5288   7
   3  -3   8 605.966 51.5692   5
   3  -3   8 602.414 30.8069   6
  -3   3  -8 667.444 51.6572   5
   3   3   8 669.503 62.0406   5
   3  -3   8 617.879 35.6985   1
  -3  -3  -8 625.732 41.8833   4
  -3  -3  -8 622.102 37.0099   1
   3  -3   8 668.835 37.4763   3
  -3   3  -8 606.686 41.5020   2
  -3  -3  -8 597.533 39.5878  10
  -3   3  -8 586.151 54.8928  13
  -3   3  -8 661.613 51.9069   9
   3  -3   8 630.149 50.2951   9
   3   3   8 575.140 63.4649   9
   3   3   8 688.350 65.1502   7
   3  -3   9 310.684 27.3687   6
  -3   3  -9 358.104 46.8666   5
   3  -3   9 275.245 47.1594   5
   3   3   9 325.351 60.6003   7
   3   3   9 343.707 57.7303   5
   3  -3   9 314.551 31.7095   3
  -3   3  -9 373.068 36.2805   4
[truncated: 1,135,218 more chars]
