# Supplementary material for: Halogen Bonding in Sulphonamide Co-Crystals: X···π Preferred over X···O/N?
Source: Molecules. 2023 Aug 6;28(15):5910. doi: 10.3390/molecules28155910 (PMC10420850; doi:10.3390/molecules28155910)
Supplement: Supplementary file 1 [file molecules-28-05910-s001.zip › 7-SM068_Mo-CPA_12DITFB.cif]

data_th_sm068_mo_autored
_audit_creation_date               2022-02-07
_audit_creation_method
;
Olex2 1.3-ac4
(compiled 2020.11.27 svn.r5f609507 for Rigaku Oxford Diffraction, GUI svn.r6214)
;
_shelx_SHELXL_version_number       '2016/6'
_audit_contact_author_address      ?
_audit_contact_author_email        ?
_audit_contact_author_name         ''
_audit_contact_author_phone        ?
_publ_contact_author_id_orcid      ?
_publ_section_references
;
Dolomanov, O.V., Bourhis, L.J., Gildea, R.J, Howard, J.A.K. & Puschmann, H.
 (2009), J. Appl. Cryst. 42, 339-341.

Sheldrick, G.M. (2015). Acta Cryst. A71, 3-8.

Sheldrick, G.M. (2015). Acta Cryst. C71, 3-8.
;
_chemical_name_common              ?
_chemical_name_systematic          ?
_chemical_formula_moiety           'C3 F2 I, C10 H13 Cl N2 O3 S'
_chemical_formula_sum              'C13 H13 Cl F2 I N2 O3 S'
_chemical_formula_weight           477.66
_chemical_melting_point            ?
_chemical_oxdiff_formula           'C13 H13 Cl F2 I N2 O3 S'
loop_
  _atom_type_symbol
  _atom_type_description
  _atom_type_scat_dispersion_real
  _atom_type_scat_dispersion_imag
  _atom_type_scat_source
 'C' 'C' 0.0033 0.0016 'International Tables Vol C Tables 4.2.6.8 and 6.1.1.4'
 'H' 'H' 0.0000 0.0000 'International Tables Vol C Tables 4.2.6.8 and 6.1.1.4'
 'Cl' 'Cl' 0.1484 0.1585 'International Tables Vol C Tables 4.2.6.8 and 6.1.1.4'
 'F' 'F' 0.0171 0.0103 'International Tables Vol C Tables 4.2.6.8 and 6.1.1.4'
 'I' 'I' -0.4742 1.8119 'International Tables Vol C Tables 4.2.6.8 and 6.1.1.4'
 'N' 'N' 0.0061 0.0033 'International Tables Vol C Tables 4.2.6.8 and 6.1.1.4'
 'O' 'O' 0.0106 0.0060 'International Tables Vol C Tables 4.2.6.8 and 6.1.1.4'
 'S' 'S' 0.1246 0.1234 'International Tables Vol C Tables 4.2.6.8 and 6.1.1.4'

_shelx_space_group_comment
;
The symmetry employed for this shelxl refinement is uniquely defined
by the following loop, which should always be used as a source of
symmetry information in preference to the above space-group names.
They are only intended as comments.
;
_space_group_crystal_system        'monoclinic'
_space_group_IT_number             15
_space_group_name_H-M_alt          'C 1 2/c 1'
_space_group_name_Hall             '-C 2yc'
loop_
  _space_group_symop_operation_xyz
 'x, y, z'
 '-x, y, -z+1/2'
 'x+1/2, y+1/2, z'
 '-x+1/2, y+1/2, -z+1/2'
 '-x, -y, -z'
 'x, -y, z-1/2'
 '-x+1/2, -y+1/2, -z'
 'x+1/2, -y+1/2, z-1/2'

_cell_length_a                     16.9967(2)
_cell_length_b                     8.90250(10)
_cell_length_c                     22.2511(3)
_cell_angle_alpha                  90
_cell_angle_beta                   95.9650(10)
_cell_angle_gamma                  90
_cell_volume                       3348.65(7)
_cell_formula_units_Z              8
_cell_measurement_reflns_used      33693
_cell_measurement_temperature      99.99(10)
_cell_measurement_theta_max        30.4170
_cell_measurement_theta_min        2.4130
_shelx_estimated_absorpt_T_max     0.656
_shelx_estimated_absorpt_T_min     0.396
_exptl_absorpt_coefficient_mu      2.231
_exptl_absorpt_correction_T_max    1.000
_exptl_absorpt_correction_T_min    0.274
_exptl_absorpt_correction_type     gaussian
_exptl_absorpt_process_details
;
CrysAlisPro 1.171.41.98a (Rigaku Oxford Diffraction, 2021)
Numerical absorption correction based on gaussian integration over
a multifaceted crystal model
Empirical absorption correction using spherical harmonics,
implemented in SCALE3 ABSPACK scaling algorithm.
;
_exptl_absorpt_special_details     ?
_exptl_crystal_colour              'clear colourless'
_exptl_crystal_colour_lustre       clear
_exptl_crystal_colour_primary      colourless
_exptl_crystal_density_diffrn      1.895
_exptl_crystal_density_meas        ?
_exptl_crystal_density_method      ?
_exptl_crystal_description         block
_exptl_crystal_F_000               1864
loop_
  _exptl_crystal_face_index_h
  _exptl_crystal_face_index_k
  _exptl_crystal_face_index_l
  _exptl_crystal_face_perp_dist
 15 -1 -27 0.1656
 12 11 6 0.1957
 -18 -5 18 0.0755
 22 -1 -14 0.1177
 -16 -9 10 0.1254
 -17 8 11 0.0552
 23 -3 5 0.1094
 23 3 -3 0.1378
 -23 2 -4 0.1045
 -10 9 -15 0.2052
 8 -6 24 0.1091
 -20 0 -15 0.1567
 2 2 -31 0.1877
 -7 -2 -28 0.1981

_exptl_crystal_size_max            0.51
_exptl_crystal_size_mid            0.326
_exptl_crystal_size_min            0.206
loop_
  _exptl_oxdiff_crystal_face_indexfrac_h
  _exptl_oxdiff_crystal_face_indexfrac_k
  _exptl_oxdiff_crystal_face_indexfrac_l
  _exptl_oxdiff_crystal_face_x
  _exptl_oxdiff_crystal_face_y
  _exptl_oxdiff_crystal_face_z
 14.5345 -0.8114 -26.7037 -0.1791 -0.7614 -0.6231
 11.5705 10.5251 6.3071 0.1407 0.5758 -0.8054
 -18.2303 -5.4241 17.5983 0.0613 0.2734 0.9599
 22.3654 -0.5905 -14.1454 0.3166 -0.5750 -0.7544
 -16.4892 -8.5458 10.0891 0.0348 -0.0722 0.9968
 -16.9441 8.1506 11.0081 -0.4700 0.8612 0.1936
 22.5351 -2.6813 5.1732 0.8247 -0.2888 -0.4862
 23.2910 2.9539 -3.2666 0.4807 -0.1659 -0.8611
 -23.1319 1.7250 -3.7647 -0.7799 0.2726 0.5634
 -9.7787 9.4615 -14.7288 -0.8967 0.3174 -0.3086
 7.5743 -6.2881 24.1067 0.9512 0.0750 0.2993
 -19.8574 0.2398 -14.7512 -0.8932 -0.0732 0.4437
 2.2615 1.5176 -31.1432 -0.6919 -0.5905 -0.4155
 -6.6817 -2.4155 -28.4494 -0.7577 -0.6493 0.0661

_exptl_transmission_factor_max     ?
_exptl_transmission_factor_min     ?
_diffrn_reflns_av_R_equivalents    0.0259
_diffrn_reflns_av_unetI/netI       0.0112
_diffrn_reflns_Laue_measured_fraction_full  1.000
_diffrn_reflns_Laue_measured_fraction_max  0.898
_diffrn_reflns_limit_h_max         22
_diffrn_reflns_limit_h_min         -23
_diffrn_reflns_limit_k_max         12
_diffrn_reflns_limit_k_min         -12
_diffrn_reflns_limit_l_max         31
_diffrn_reflns_limit_l_min         -30
_diffrn_reflns_number              41319
_diffrn_reflns_point_group_measured_fraction_full  1.000
_diffrn_reflns_point_group_measured_fraction_max  0.898
_diffrn_reflns_theta_full          25.242
_diffrn_reflns_theta_max           30.132
_diffrn_reflns_theta_min           2.410
_diffrn_ambient_environment        N~2~
_diffrn_ambient_temperature        99.99(10)
_diffrn_detector                   'Hybrid Pixel Array Detector'
_diffrn_detector_area_resol_mean   10.0000
_diffrn_detector_type              HyPix
_diffrn_measured_fraction_theta_full  1.000
_diffrn_measured_fraction_theta_max  0.898
_diffrn_measurement_details
;
List of Runs (angles in degrees, time in seconds):

  # Type    Start    End  Width  t~exp~   \w     \q     \k     \f   Frames
--------------------------------------------------------------------------
  1  \w    -68.00   9.00   0.50    4.59    --    1.79 -38.00  60.00  154
  2  \w    -44.00  10.00   0.50    4.59    --    1.79 -38.00   0.00  108
  3  \w    -23.00  33.00   0.50    4.59    --    1.96 -99.00 -30.00  112
  4  \w    -21.00  33.00   0.50    4.59    --    1.96 -99.00-150.00  108
  5  \w    -49.00  46.00   0.50    4.59    --    1.96   0.00-180.00  190
  6  \w    -50.00  -8.00   0.50    4.59    --    1.96   0.00  30.00   84
  7  \w    -23.00  32.00   0.50    4.59    --    1.96 -99.00 -90.00  110
  8  \w      2.00  41.00   0.50    4.59    --    1.96   0.00  30.00   78
  9  \w    -19.00  33.00   0.50    4.59    --    1.96 -99.00 120.00  104
 10  \w    -69.00  10.00   0.50    4.59    --    1.96 -38.00 150.00  158
 11  \w    -70.00  12.00   0.50    4.59    --    1.96  -4.00 -63.24  164
;
_diffrn_measurement_device         'four-circle diffractometer'
_diffrn_measurement_device_type    'XtaLAB Synergy, Dualflex, HyPix'
_diffrn_measurement_method         '\w scans'
_diffrn_orient_matrix_type        
 'CrysAlisPro convention (1999,Acta A55,543-557)'
_diffrn_orient_matrix_UB_11        0.0277229000
_diffrn_orient_matrix_UB_12        -0.0307322000
_diffrn_orient_matrix_UB_13        0.0227309000
_diffrn_orient_matrix_UB_21        -0.0111119000
_diffrn_orient_matrix_UB_22        0.0544535000
_diffrn_orient_matrix_UB_23        0.0208084000
_diffrn_orient_matrix_UB_31        -0.0294724000
_diffrn_orient_matrix_UB_32        -0.0493914000
_diffrn_orient_matrix_UB_33        0.0087933000
_diffrn_radiation_monochromator    mirror
_diffrn_radiation_probe            x-ray
_diffrn_radiation_type             'Mo K\a'
_diffrn_radiation_wavelength       0.71073
_diffrn_source                     'micro-focus sealed X-ray tube'
_diffrn_source_type                'PhotonJet (Mo) X-ray Source'
_reflns_Friedel_coverage           0.000
_reflns_Friedel_fraction_full      .
_reflns_Friedel_fraction_max       .
_reflns_number_gt                  4289
_reflns_number_total               4452
_reflns_odcompleteness_completeness  99.94
_reflns_odcompleteness_iscentric   1
_reflns_odcompleteness_theta       25.07
_reflns_special_details
;
 Reflections were merged by SHELXL according to the crystal
 class for the calculation of statistics and refinement.
 
 _reflns_Friedel_fraction is defined as the number of unique
 Friedel pairs measured divided by the number that would be
 possible theoretically, ignoring centric projections and
 systematic absences.
;
_reflns_threshold_expression       'I > 2\s(I)'
_computing_cell_refinement         'CrysAlisPro 1.171.41.98a (Rigaku OD, 2021)'
_computing_data_collection         'CrysAlisPro 1.171.41.98a (Rigaku OD, 2021)'
_computing_data_reduction          'CrysAlisPro 1.171.41.98a (Rigaku OD, 2021)'
_computing_molecular_graphics      'Olex2 1.3-ac4 (Dolomanov et al., 2009)'
_computing_publication_material    'Olex2 1.3-ac4 (Dolomanov et al., 2009)'
_computing_structure_refinement    'SHELXL 2016/6 (Sheldrick, 2015)'
_computing_structure_solution      'SHELXT  (Sheldrick, 2015)'
_refine_diff_density_max           0.473
_refine_diff_density_min           -0.564
_refine_diff_density_rms           0.061
_refine_ls_extinction_coef         .
_refine_ls_extinction_method       none
_refine_ls_goodness_of_fit_ref     1.069
_refine_ls_hydrogen_treatment      refxyz
_refine_ls_matrix_type             full
_refine_ls_number_parameters       259
_refine_ls_number_reflns           4452
_refine_ls_number_restraints       0
_refine_ls_R_factor_all            0.0186
_refine_ls_R_factor_gt             0.0177
_refine_ls_restrained_S_all        1.069
_refine_ls_shift/su_max            0.001
_refine_ls_shift/su_mean           0.000
_refine_ls_structure_factor_coef   Fsqd
_refine_ls_weighting_details      
 'w=1/[\s^2^(Fo^2^)+(0.0180P)^2^+5.5679P] where P=(Fo^2^+2Fc^2^)/3'
_refine_ls_weighting_scheme        calc
_refine_ls_wR_factor_gt            0.0436
_refine_ls_wR_factor_ref           0.0439
_refine_special_details            ?
_olex2_refinement_description
;
1. Fixed Uiso
 At 1.5 times of:
  All H(H) groups
;
_atom_sites_solution_hydrogens     difmap
_atom_sites_solution_primary       dual
_atom_sites_solution_secondary     ?
loop_
  _atom_site_label
  _atom_site_type_symbol
  _atom_site_fract_x
  _atom_site_fract_y
  _atom_site_fract_z
  _atom_site_U_iso_or_equiv
  _atom_site_adp_type
  _atom_site_occupancy
  _atom_site_site_symmetry_order
  _atom_site_calc_flag
  _atom_site_refinement_flags_posn
  _atom_site_refinement_flags_adp
  _atom_site_refinement_flags_occupancy
  _atom_site_disorder_assembly
  _atom_site_disorder_group
 I1 I 0.06199(2) 0.51091(2) 0.18643(2) 0.02305(4) Uani 1 1 d . . . . .
 S1 S 0.30753(2) 0.25599(3) 0.14796(2) 0.01240(6) Uani 1 1 d . . . . .
 Cl1 Cl 0.00964(2) 0.26480(7) -0.04140(2) 0.03908(12) Uani 1 1 d . . . . .
 F1 F 0.09070(5) 0.84750(11) 0.15656(4) 0.02538(19) Uani 1 1 d . . . . .
 F2 F 0.04248(6) 1.10759(10) 0.20170(5) 0.0297(2) Uani 1 1 d . . . . .
 O1 O 0.33485(6) 0.10415(11) 0.15451(5) 0.01671(19) Uani 1 1 d . . . . .
 O3 O 0.21748(6) 0.09662(10) 0.23933(4) 0.01522(18) Uani 1 1 d . . . . .
 O2 O 0.35990(6) 0.37231(11) 0.13206(5) 0.01739(19) Uani 1 1 d . . . . .
 N1 N 0.27856(7) 0.31323(13) 0.21205(5) 0.0142(2) Uani 1 1 d . . . . .
 N2 N 0.20741(7) 0.31218(13) 0.29360(5) 0.0150(2) Uani 1 1 d . . . . .
 C1 C 0.22271(8) 0.25817(15) 0.09505(6) 0.0147(2) Uani 1 1 d . . . . .
 C7 C 0.23220(8) 0.23075(14) 0.24891(6) 0.0126(2) Uani 1 1 d . . . . .
 C12 C 0.04535(8) 0.84206(17) 0.20273(7) 0.0197(3) Uani 1 1 d . . . . .
 C2 C 0.21400(9) 0.37339(16) 0.05251(7) 0.0193(3) Uani 1 1 d . . . . .
 C13 C 0.02228(9) 0.97747(16) 0.22584(7) 0.0215(3) Uani 1 1 d . . . . .
 C8 C 0.15733(8) 0.25280(16) 0.33733(6) 0.0162(2) Uani 1 1 d . . . . .
 C11 C 0.02332(8) 0.70599(16) 0.22592(6) 0.0177(3) Uani 1 1 d . . . . .
 C6 C 0.16665(9) 0.14468(18) 0.09597(7) 0.0218(3) Uani 1 1 d . . . . .
 C9 C 0.19895(9) 0.25572(17) 0.40118(7) 0.0203(3) Uani 1 1 d . . . . .
 C3 C 0.14760(10) 0.37516(19) 0.01035(7) 0.0241(3) Uani 1 1 d . . . . .
 C5 C 0.10002(9) 0.1471(2) 0.05389(7) 0.0274(3) Uani 1 1 d . . . . .
 C4 C 0.09169(9) 0.2627(2) 0.01164(6) 0.0245(3) Uani 1 1 d . . . . .
 C10 C 0.14317(11) 0.2076(2) 0.44692(8) 0.0275(3) Uani 1 1 d . . . . .
 H6 H 0.1735(11) 0.070(2) 0.1253(9) 0.023(5) Uiso 1 1 d . . . . .
 H8A H 0.1083(12) 0.310(2) 0.3333(9) 0.025(5) Uiso 1 1 d . . . . .
 H9A H 0.2181(12) 0.353(2) 0.4102(9) 0.027(5) Uiso 1 1 d . . . . .
 H2A H 0.2555(12) 0.445(2) 0.0506(9) 0.027(5) Uiso 1 1 d . . . . .
 H9B H 0.2435(12) 0.196(2) 0.4029(9) 0.025(5) Uiso 1 1 d . . . . .
 H2 H 0.2178(13) 0.403(3) 0.2950(10) 0.038 Uiso 1 1 d . U . . .
 H8B H 0.1437(11) 0.158(2) 0.3255(9) 0.021(4) Uiso 1 1 d . . . . .
 H1 H 0.2837(12) 0.400(3) 0.2176(10) 0.029(5) Uiso 1 1 d . . . . .
 H10A H 0.1224(13) 0.110(3) 0.4391(10) 0.037(6) Uiso 1 1 d . . . . .
 H3 H 0.1403(13) 0.448(3) -0.0190(10) 0.032(5) Uiso 1 1 d . . . . .
 H10B H 0.1682(13) 0.209(2) 0.4884(10) 0.035(6) Uiso 1 1 d . . . . .
 H10C H 0.0994(14) 0.271(3) 0.4455(11) 0.041(6) Uiso 1 1 d . . . . .
 H5 H 0.0597(13) 0.072(3) 0.0536(10) 0.036(6) Uiso 1 1 d . . . . .

loop_
  _atom_site_aniso_label
  _atom_site_aniso_U_11
  _atom_site_aniso_U_22
  _atom_site_aniso_U_33
  _atom_site_aniso_U_23
  _atom_site_aniso_U_13
  _atom_site_aniso_U_12
 I1 0.02445(6) 0.01928(5) 0.02431(6) -0.00339(3) -0.00282(4) 0.00467(3)
 S1 0.01459(14) 0.00954(13) 0.01322(14) 0.00005(10) 0.00212(11) -0.00058(11)
 Cl1 0.01811(17) 0.0812(4) 0.01733(17) 0.00613(19) -0.00118(13) 0.0022(2)
 F1 0.0233(4) 0.0280(5) 0.0250(5) 0.0023(4) 0.0032(4) -0.0029(4)
 F2 0.0249(5) 0.0168(4) 0.0465(6) 0.0084(4) -0.0012(4) -0.0040(4)
 O1 0.0200(5) 0.0112(4) 0.0193(5) -0.0003(4) 0.0037(4) 0.0027(4)
 O3 0.0200(5) 0.0084(4) 0.0174(4) 0.0002(3) 0.0028(4) -0.0001(4)
 O2 0.0187(4) 0.0146(4) 0.0194(5) 0.0006(4) 0.0043(4) -0.0039(4)
 N1 0.0206(5) 0.0082(5) 0.0141(5) -0.0016(4) 0.0037(4) -0.0018(4)
 N2 0.0222(6) 0.0085(5) 0.0153(5) 0.0005(4) 0.0063(4) -0.0006(4)
 C1 0.0169(6) 0.0145(6) 0.0127(6) -0.0005(5) 0.0019(5) 0.0004(5)
 C7 0.0134(5) 0.0112(5) 0.0129(5) 0.0015(4) -0.0006(4) 0.0016(5)
 C12 0.0152(6) 0.0214(7) 0.0214(7) 0.0018(5) -0.0031(5) -0.0009(5)
 C2 0.0237(7) 0.0155(6) 0.0188(6) 0.0021(5) 0.0022(5) 0.0010(5)
 C13 0.0161(6) 0.0161(6) 0.0307(8) 0.0030(6) -0.0052(6) -0.0022(5)
 C8 0.0181(6) 0.0131(6) 0.0182(6) 0.0007(5) 0.0056(5) 0.0002(5)
 C11 0.0160(6) 0.0160(6) 0.0196(6) -0.0018(5) -0.0045(5) 0.0016(5)
 C6 0.0228(7) 0.0252(7) 0.0170(6) 0.0041(6) -0.0001(5) -0.0065(6)
 C9 0.0259(7) 0.0177(7) 0.0180(6) 0.0024(5) 0.0054(5) 0.0005(6)
 C3 0.0280(7) 0.0269(7) 0.0170(6) 0.0047(6) 0.0007(6) 0.0073(6)
 C5 0.0214(7) 0.0403(9) 0.0200(7) 0.0042(7) 0.0000(6) -0.0101(7)
 C4 0.0163(6) 0.0436(9) 0.0136(6) 0.0004(6) 0.0008(5) 0.0037(6)
 C10 0.0395(9) 0.0237(8) 0.0214(7) 0.0009(6) 0.0142(7) -0.0009(7)

_geom_special_details
;
 All esds (except the esd in the dihedral angle between two l.s. planes)
 are estimated using the full covariance matrix.  The cell esds are taken
 into account individually in the estimation of esds in distances, angles
 and torsion angles; correlations between esds in cell parameters are only
 used when they are defined by crystal symmetry.  An approximate (isotropic)
 treatment of cell esds is used for estimating esds involving l.s. planes.
;
loop_
  _geom_bond_atom_site_label_1
  _geom_bond_atom_site_label_2
  _geom_bond_distance
  _geom_bond_site_symmetry_2
  _geom_bond_publ_flag
 I1 C11 2.0833(14) . ?
 S1 O1 1.4318(10) . ?
 S1 O2 1.4337(10) . ?
 S1 N1 1.6376(12) . ?
 S1 C1 1.7641(14) . ?
 Cl1 C4 1.7311(15) . ?
 F1 C12 1.3477(17) . ?
 F2 C13 1.3366(17) . ?
 O3 C7 1.2340(16) . ?
 N1 C7 1.4025(17) . ?
 N2 C7 1.3339(17) . ?
 N2 C8 1.4569(17) . ?
 C1 C2 1.3931(19) . ?
 C1 C6 1.390(2) . ?
 C12 C13 1.383(2) . ?
 C12 C11 1.384(2) . ?
 C2 C3 1.391(2) . ?
 C13 C13 1.378(3) 2 ?
 C8 C9 1.520(2) . ?
 C11 C11 1.398(3) 2 ?
 C6 C5 1.393(2) . ?
 C9 C10 1.523(2) . ?
 C3 C4 1.383(2) . ?
 C5 C4 1.391(2) . ?

loop_
  _geom_angle_atom_site_label_1
  _geom_angle_atom_site_label_2
  _geom_angle_atom_site_label_3
  _geom_angle
  _geom_angle_site_symmetry_1
  _geom_angle_site_symmetry_3
  _geom_angle_publ_flag
 O1 S1 O2 120.26(6) . . ?
 O1 S1 N1 109.19(6) . . ?
 O1 S1 C1 108.19(6) . . ?
 O2 S1 N1 103.93(6) . . ?
 O2 S1 C1 108.22(6) . . ?
 N1 S1 C1 106.20(6) . . ?
 C7 N1 S1 125.76(10) . . ?
 C7 N2 C8 123.53(12) . . ?
 C2 C1 S1 118.90(11) . . ?
 C6 C1 S1 119.73(11) . . ?
 C6 C1 C2 121.36(13) . . ?
 O3 C7 N1 121.45(12) . . ?
 O3 C7 N2 125.49(12) . . ?
 N2 C7 N1 113.06(12) . . ?
 F1 C12 C13 117.31(13) . . ?
 F1 C12 C11 120.94(13) . . ?
 C13 C12 C11 121.75(14) . . ?
 C3 C2 C1 119.22(14) . . ?
 F2 C13 C12 120.74(14) . . ?
 F2 C13 C13 119.90(9) . 2 ?
 C13 C13 C12 119.35(9) 2 . ?
 N2 C8 C9 111.75(12) . . ?
 C12 C11 I1 117.59(11) . . ?
 C12 C11 C11 118.88(9) . 2 ?
 C11 C11 I1 123.53(4) 2 . ?
 C1 C6 C5 119.31(14) . . ?
 C8 C9 C10 111.00(13) . . ?
 C4 C3 C2 119.27(14) . . ?
 C4 C5 C6 118.97(15) . . ?
 C3 C4 Cl1 118.98(12) . . ?
 C3 C4 C5 121.87(14) . . ?
 C5 C4 Cl1 119.15(13) . . ?

_shelx_res_file
;
TITL th_sm068_mo_autored_a.res in C2/c
    th_sm068_mo_autored.res
    created by SHELXL-2016/6 at 14:01:28 on 07-Feb-2022
REM Old TITL TH_SM068_Mo_autored in C2/c
REM SHELXT solution in C2/c
REM R1 0.088, Rweak 0.003, Alpha 0.049, Orientation as input
REM Formula found by SHELXT: C10 N2 O2 S Cl I
CELL 0.71073 16.9967 8.9025 22.2511 90 95.965 90
ZERR 8 0.0002 0.0001 0.0003 0 0.001 0
LATT 7
SYMM -X,+Y,0.5-Z
SFAC C H Cl F I N O S
UNIT 104 104 8 16 8 16 24 8

L.S. 99
PLAN  3
SIZE 0.206 0.326 0.51
TEMP -173.16(10)
fmap 2
acta
REM <olex2.extras>
REM <HklSrc "%.\\TH_SM068_Mo_autored.hkl">
REM </olex2.extras>

WGHT    0.018000    5.567900
FVAR       1.18247
I1    5    0.061993    0.510907    0.186433    11.00000    0.02445    0.01928 =
         0.02431   -0.00339   -0.00282    0.00467
S1    8    0.307531    0.255989    0.147959    11.00000    0.01459    0.00954 =
         0.01322    0.00005    0.00212   -0.00058
CL1   3    0.009638    0.264797   -0.041405    11.00000    0.01811    0.08118 =
         0.01733    0.00613   -0.00118    0.00219
F1    4    0.090698    0.847498    0.156563    11.00000    0.02329    0.02798 =
         0.02500    0.00235    0.00317   -0.00294
F2    4    0.042481    1.107586    0.201703    11.00000    0.02486    0.01677 =
         0.04651    0.00838   -0.00119   -0.00400
O1    7    0.334849    0.104153    0.154510    11.00000    0.01996    0.01117 =
         0.01934   -0.00032    0.00369    0.00271
O3    7    0.217479    0.096618    0.239332    11.00000    0.02004    0.00843 =
         0.01737    0.00015    0.00276   -0.00008
O2    7    0.359903    0.372315    0.132059    11.00000    0.01865    0.01460 =
         0.01940    0.00063    0.00426   -0.00393
N1    6    0.278564    0.313230    0.212052    11.00000    0.02058    0.00816 =
         0.01411   -0.00159    0.00366   -0.00176
N2    6    0.207411    0.312181    0.293605    11.00000    0.02219    0.00848 =
         0.01529    0.00049    0.00628   -0.00062
C1    1    0.222714    0.258169    0.095045    11.00000    0.01692    0.01452 =
         0.01265   -0.00054    0.00188    0.00037
C7    1    0.232202    0.230747    0.248910    11.00000    0.01337    0.01119 =
         0.01289    0.00151   -0.00064    0.00165
C12   1    0.045348    0.842062    0.202727    11.00000    0.01516    0.02144 =
         0.02144    0.00178   -0.00306   -0.00093
C2    1    0.213999    0.373388    0.052511    11.00000    0.02367    0.01549 =
         0.01877    0.00208    0.00224    0.00099
C13   1    0.022281    0.977468    0.225844    11.00000    0.01613    0.01610 =
         0.03072    0.00305   -0.00515   -0.00218
C8    1    0.157331    0.252802    0.337329    11.00000    0.01807    0.01309 =
         0.01824    0.00072    0.00561    0.00024
C11   1    0.023320    0.705987    0.225917    11.00000    0.01599    0.01603 =
         0.01964   -0.00180   -0.00449    0.00157
C6    1    0.166646    0.144684    0.095975    11.00000    0.02279    0.02521 =
         0.01705    0.00408   -0.00015   -0.00650
C9    1    0.198945    0.255720    0.401181    11.00000    0.02591    0.01772 =
         0.01804    0.00237    0.00538    0.00046
C3    1    0.147601    0.375159    0.010345    11.00000    0.02802    0.02686 =
         0.01700    0.00468    0.00068    0.00732
C5    1    0.100017    0.147087    0.053895    11.00000    0.02145    0.04027 =
         0.02004    0.00420   -0.00004   -0.01009
C4    1    0.091693    0.262663    0.011643    11.00000    0.01628    0.04362 =
         0.01358    0.00041    0.00076    0.00369
C10   1    0.143165    0.207554    0.446924    11.00000    0.03952    0.02374 =
         0.02142    0.00094    0.01419   -0.00086
H6    2    0.173517    0.070468    0.125319    11.00000    0.02252
H8A   2    0.108303    0.310370    0.333304    11.00000    0.02463
H9A   2    0.218116    0.352805    0.410176    11.00000    0.02698
H2A   2    0.255489    0.444633    0.050578    11.00000    0.02692
H9B   2    0.243501    0.195817    0.402935    11.00000    0.02512
H2    2    0.217821    0.402717    0.295045    11.00000   -1.50000
H8B   2    0.143687    0.157550    0.325513    11.00000    0.02066
H1    2    0.283689    0.399788    0.217620    11.00000    0.02948
H10A  2    0.122368    0.110059    0.439128    11.00000    0.03677
H3    2    0.140338    0.447552   -0.019038    11.00000    0.03202
H10B  2    0.168229    0.208911    0.488380    11.00000    0.03470
H10C  2    0.099437    0.271262    0.445529    11.00000    0.04050
H5    2    0.059723    0.071791    0.053571    11.00000    0.03612
HKLF 4


REM  th_sm068_mo_autored_a.res in C2/c
REM R1 =  0.0177 for    4289 Fo > 4sig(Fo)  and  0.0186 for all    4452 data
REM    259 parameters refined using      0 restraints

END

WGHT      0.0180      5.5501

REM Highest difference peak  0.473,  deepest hole -0.564,  1-sigma level  0.061
Q1    1   0.1082  0.5185  0.1849  11.00000  0.05    0.47
Q2    1   0.0443  0.4906  0.2196  11.00000  0.05    0.45
Q3    1   0.0000  0.9812  0.2500  10.50000  0.05    0.44
;
_shelx_res_checksum                54682
_shelx_hkl_file
;
   0   0   3 27.8771 6.55228   2
   0   0  -3 26.7220 10.6084   5
   0   0  -4 5085.14 134.599   5
   0   0   4 4801.70 116.611   2
   0   0   5 24.2084 10.6791   2
   0   0  -5 10.4181 13.0787   5
   0   0   6 128636. 2384.81   2
   0   0  -6 132429. 2420.44   5
   0   0  -7 78.5984 24.4763   5
   0   0   7 18.3996 12.8524   2
   0   0   7 61.4194 19.1389  10
   0   0  -8 151874. 2878.81   5
   0   0  -8 155588. 2844.64  11
   0   0   8 151881. 2829.35   2
   0   0   8 155557. 2834.56  10
   0   0  -9 25.7502 23.3128   5
   0   0  -9 39.4113 21.9678  11
   0   0   9 5.46554 13.0189   2
   0   0   9 27.8703 16.5575  10
   0   0 -10 1254.53 87.1463   5
   0   0 -10 1160.19 70.7054  11
   0   0  10 1027.39 60.5527   2
   0   0  10 1128.42 63.4382  10
   0   0 -11-4.03419 27.5916   5
   0   0 -11-2.62602 19.2737  11
   0   0  11 24.5469 16.3787   2
   0   0  11 13.1211 19.1334  10
   0   0 -12 3699.84 170.484   5
   0   0 -12 3321.01 135.755  11
   0   0  12 3504.59 131.715   2
   0   0  12 3621.71 130.108  10
   0   0 -13 28.8015 30.2430   5
   0   0 -13 15.1634 22.5509  11
   0   0  13 26.6195 21.4976   2
   0   0  13 12.3916 20.6571  10
   0   0  14 16588.8 391.613  10
   0   0 -14 16972.3 413.911  11
   0   0  14 15872.0 395.618   2
   0   0 -14 16725.4 468.887   5
   0   0 -15 39.1510 40.5073   5
   0   0  15 6.12761 24.4746   2
   0   0 -15 76.1593 34.9756  11
   0   0  16 7834.69 257.110   1
   0   0 -16 8450.31 265.880  11
   0   0  16 8491.82 255.032   2
   0   0 -16 8644.59 318.268   5
   0   0 -17 31.6284 51.0791   5
   0   0 -17-11.6014 34.7607  11
   0   0  17 17.4550 28.7961   2
   0   0  17 19.6882 31.7963   1
   0   0  18 14704.7 403.011   1
   0   0  18 15083.0 374.161  10
   0   0 -18 15641.5 406.894  11
   0   0  18 14186.7 387.371   2
   0   0 -18 13984.7 461.360   5
   0   0  19 41.1745 38.2726  10
   0   0 -19-4.26188 40.5950  11
   0   0 -19 42.8434 57.0304   5
   0   0  19 39.2839 35.9277   2
   0   0  19 17.5682 40.8426   1
   0   0  20 32256.4 748.734   1
   0   0  20 32308.4 702.898  10
   0   0 -20 34103.8 748.468  11
   0   0  20 30712.9 726.453   2
   0   0 -20 31486.5 830.775   5
   0   0  21 73.5816 42.1495  10
   0   0 -21 32.0205 47.1716  11
   0   0 -21 63.5278 66.8567   5
   0   0  21 47.7867 39.7364   2
   0   0  21 19.4130 44.3903   1
   0   0  22 23100.1 598.225   1
   0   0 -22 24932.1 598.056  11
   0   0  22 23803.1 550.334  10
   0   0  22 22785.3 581.438   2
   0   0 -22 23142.8 691.136   5
   0   0 -23 98.4038 55.2884  11
   0   0  23 87.4451 47.8748  10
   0   0 -23 70.3623 80.4498   5
   0   0 -23 101.863 51.1363   4
   0   0  23 40.8755 42.7156   9
   0   0  23 100.245 55.7101   2
   0   0 -23 158.197 41.8884   3
   0   0  23 74.1542 56.4289   1
   0   0  24 14177.8 429.092   1
   0   0 -24 15225.8 426.110  11
   0   0  24 13984.1 375.864  10
   0   0 -24 14632.1 348.839   3
   0   0 -24 13133.5 386.966   4
   0   0  24 14191.4 364.954   9
   0   0  24 13734.3 411.361   2
   0   0 -24 13577.1 502.396   5
   0   0  25 62.8681 58.5404   1
   0   0 -25 41.9879 58.6243  11
   0   0  25 47.2591 50.1088  10
   0   0 -25 44.0942 52.5044   4
   0   0  25 99.1682 46.1851   9
   0   0  25 62.2386 55.2372   2
   0   0 -25 18.9828 36.3952   3
   0   0 -25 28.4903 71.5141   5
   0   0  26 5416.58 243.293   1
   0   0 -26 5623.74 235.414  11
   0   0  26 5273.35 200.288  10
   0   0 -26 5572.96 181.279   3
   0   0 -26 4676.15 207.470   4
   0   0  26 5348.43 189.449   9
   0   0 -26 4815.55 290.100   5
   0   0  26 4982.81 227.487   2
   0   0  27-3.78199 45.0270  10
   0   0 -27 4.65743 51.4220   4
   0   0 -27-41.2497 87.6795   5
   0   0 -27 8.66172 33.3273   3
   0   0  27 19.7732 45.5875   9
   0   0  28 123.629 44.6945   9
   0   0 -28 94.8645 38.3870   3
   0   0  28 103.775 49.7442  10
   0   0  29 6.68471 46.2352   9
   0   0  29 3.87157 52.1489  10
   0   0  30 10681.3 302.349   9
   0   2   0 31657.3 587.500   1
   0   2   0 31930.8 617.309   5
   0   2   0 32481.6 610.319   8
   0  -2   0 31141.8 607.352   7
   0  -2   0 31229.1 611.190   3
   0   2   1 3340.33 82.2459   1
   0   2  -1 3343.57 94.1034   5
   0   2   1 3227.47 102.879   5
   0   2  -1 3532.08 92.2529   8
   0  -2  -1 3317.62 92.2314   7
   0  -2   1 3331.84 95.1931   3
   0  -2   2 158741. 2835.07   3
   0   2   2 154553. 2823.76   1
   0   2  -2 159048. 2824.46   8
   0  -2  -2 153447. 2831.43   7
   0   2   2 160182. 2845.49   6
   0   2   2 157305. 2857.79   5
   0  -2   3 1116.79 48.3324   3
   0   2   3 1013.54 45.5644   1
   0   2  -3 991.748 44.8305  11
   0  -2  -3 1062.00 48.2839   7
   0   2   3 1136.95 56.0302   6
   0   2   3 1026.85 59.5815   5
   0   2   4 1068.13 50.6379   1
   0   2  -4 1140.00 48.8452  11
   0   2  -4 1234.79 48.6101  10
   0   2  -4 1196.53 35.2051   9
   0   2   4 1105.20 47.2657   4
   0  -2   4 1123.64 49.5754   3
   0   2   4 1106.18 60.0559   6
   0  -2  -4 1151.58 52.7660   7
   0   2   4 1064.16 66.3520   5
   0  -2  -5 11962.3 277.615   2
   0   2   5 13529.6 296.661   1
   0   2  -5 12810.0 283.343  11
   0   2  -5 13424.5 281.324  10
   0   2   5 14054.8 280.930   4
   0  -2   5 14009.1 287.748   3
   0   2  -5 13569.1 257.991   9
   0   2   5 13829.9 316.598   6
   0   2   5 12793.0 328.312   5
   0  -2  -6 50327.2 1005.61   2
   0   2   6 54178.3 1027.51   1
   0   2  -6 53108.4 1008.98  11
   0  -2   6 54274.7 979.009   9
   0  -2   6 54339.6 1000.70  10
   0   2  -6 51665.8 1004.59  10
   0   2   6 55207.0 1000.53   4
   0  -2   6 51596.0 1004.36   3
   0  -2  -6 55656.4 1002.01   4
   0   2  -6 53183.7 977.887   9
   0   2   6 54803.0 1049.82   6
   0  -2  -7 21.9623 14.4961   2
   0   2  -7 33.0084 15.3931  11
   0   2  -7 61.6349 16.3893  10
   0  -2   7 41.6596 14.5316  10
   0   2   7 61.4859 15.7068   4
   0  -2  -7 13.5707 12.2855   4
   0  -2   7 37.6623 9.49394   9
   0   2   7 15.3014 19.9216   6
   0  -2  -7 53.4577 27.5198   5
   0   2  -7 34.4011 15.1835   3
   0  -2  -8 111884. 2076.73   2
   0   2   8 113255. 2097.86   1
   0   2  -8 109110. 2073.22  11
   0  -2   8 99934.1 2073.72  11
   0   2  -8 110570. 2067.86  10
   0  -2   8 118590. 2062.46  10
   0   2  -8 112811. 2071.25   3
   0   2   8 118444. 2062.67   4
   0  -2  -8 113079. 2058.37   4
   0  -2   8 110843. 2035.70   9
   0   2   8 110860. 2119.26   6
   0  -2  -8 109368. 2144.84   5
   0  -2  -9 2026.00 84.5127   2
   0   2   9 1932.04 83.4052   2
   0   2   9 1879.75 90.7477   1
   0  -2   9 1708.65 82.1881  11
   0   2  -9 1863.83 80.0522  11
   0  -2   9 1985.02 73.7540  10
   0   2  -9 2057.19 81.1233  10
   0   2  -9 1896.22 77.2283   3
   0  -2  -9 1832.04 69.8008   4
   0  -2   9 1911.91 57.7621   9
   0   2   9 2010.50 104.780   6
   0  -2  -9 1983.30 114.468   5
   0   2  10 98598.8 1881.88   2
   0  -2 -10 99403.2 1883.04   2
   0   2  10 100142. 1904.80   1
   0  -2  10 99842.7 1890.72  11
   0   2 -10 98546.8 1878.32  11
   0   2 -10 100648. 1875.39  10
   0  -2  10 104823. 1861.41  10
   0   2 -10 101255. 1868.77   3
   0  -2 -10 100441. 1856.64   4
   0  -2  10 98195.5 1832.32   9
   0   2  10 101352. 1938.00   6
   0  -2 -10 99118.6 1965.22   5
   0   2  11 3871.01 138.665   2
   0   2  11 4075.12 152.863   1
   0  -2  11 4214.98 149.347  11
   0   2 -11 4123.04 138.236  11
   0   2 -11 4106.69 136.375  10
   0  -2  11 4300.10 126.885  10
   0  -2 -11 4039.54 121.710   4
   0   2 -11 4242.12 131.127   3
   0  -2  11 4071.96 106.139   9
   0   2  11 4336.59 173.691   6
   0  -2 -11 4064.65 185.697   5
   0   2  12 2931.26 119.722   2
   0   2  12 3007.95 132.177   1
   0   2 -12 3006.54 117.912  11
   0   2 -12 2879.77 115.497  10
   0  -2  12 3266.75 106.905  10
   0  -2 -12 2939.13 100.816   4
   0   2 -12 3038.70 109.355   3
   0  -2  12 2976.61 87.5558   9
   0   2  12 3095.02 147.976   6
   0  -2 -12 3056.78 164.096   5
   0   2  13 8175.90 237.830   2
   0   2  13 8365.56 255.260   1
   0  -2  13 8876.47 240.386   1
   0   2 -13 7942.17 232.682  11
   0  -2  13 8801.61 217.570  10
   0   2 -13 8303.35 236.480  10
   0  -2 -13 8041.67 210.188   4
   0   2 -13 8764.29 222.914   3
   0  -2  13 8426.92 193.308   9
   0   2  13 8718.45 281.429   6
   0  -2 -13 8398.96 303.815   5
   0   2  14 41602.3 865.420   2
   0  -2 -14 42214.0 863.713   2
   0  -2  14 43424.9 867.281   1
   0   2  14 39471.9 881.303   1
   0   2 -14 40454.7 858.551  11
   0  -2  14 43428.6 831.504  10
   0   2 -14 39686.7 858.435  10
   0  -2 -14 41140.7 825.067   4
   0   2  14 42375.9 940.417   5
   0   2 -14 43275.5 932.948   5
   0  -2  14 42701.6 803.366   9
   0   2  14 41476.8 921.719   6
   0  -2 -14 42339.4 968.136   5
   0  -2 -15 11379.5 301.023   2
   0   2  15 10878.6 299.556   2
   0  -2  15 10584.1 295.657   1
   0   2  15 10755.8 314.721   1
   0   2 -15 10500.6 295.701  10
   0   2 -15 11131.1 296.986  11
   0   2  15 11398.9 335.153  10
   0  -2  15 11100.1 269.479  10
   0   2  15 10366.8 347.416   5
   0   2 -15 10942.3 350.538   5
   0  -2 -15 10251.8 263.434   4
   0  -2  15 11067.0 246.414   9
   0   2  15 10442.3 339.231   6
   0  -2 -15 10564.4 370.215   5
   0  -2 -16 119887. 2234.60   2
   0   2  16 114727. 2232.47   2
   0   2  16 115756. 2260.12   1
   0  -2  16 118601. 2236.02   1
   0   2 -16 119574. 2229.82  11
   0   2 -16 116465. 2233.82  10
   0   2  16 120963. 2279.31  10
   0  -2  16 122564. 2192.35  10
   0   2 -16 117061. 2320.21   5
   0  -2 -16 110550. 2184.15   4
   0  -2  16 119233. 2161.12   9
   0  -2 -16 118879. 2363.31   5
   0  -2 -17 27.8143 35.3776   2
   0  -2  17 54.1223 35.6940   1
   0   2  17 29.7954 44.7647   1
   0   2 -17 130.007 45.4331  11
   0   2  17 13.4817 43.1445  10
   0  -2 -17 59.2494 31.1835   4
   0   2 -17 71.8302 55.6670   5
   0  -2  17 45.4753 26.4832   9
   0   2  17 24.5198 34.9028   2
   0  -2 -17 97.2292 64.0528   5
   0  -2  18 12979.5 363.296   1
   0   2  18 12837.7 379.557   1
   0   2 -18 13438.0 357.946  11
   0   2  18 13470.8 388.707  10
   0   2 -18 13173.1 428.346   5
   0   2 -18 13849.1 333.082   3
   0  -2 -18 12716.8 320.531   4
   0  -2  18 13367.1 300.863   9
   0   2  18 13141.4 360.980   2
   0  -2 -18 13521.1 363.234   2
   0  -2 -18 13040.6 449.672   5
   0  -2  19 1462.99 103.321   1
   0   2  19 1331.50 105.288   1
   0   2 -19 1351.91 96.7216  11
   0  -2 -19 1444.40 117.233  11
   0   2  19 1438.36 112.321  10
   0   2 -19 1352.93 82.2282   3
   0   2 -19 1466.91 132.396   5
   0  -2 -19 1413.42 81.4414   4
   0  -2  19 1350.10 67.8298   9
   0   2  19 1422.98 99.4321   2
   0  -2 -19 1588.72 104.452   2
   0  -2 -19 1383.87 137.178   5
   0  -2  20 26568.2 615.183   1
   0   2  20 22679.6 614.957   1
   0   2 -20 26685.6 603.433  11
   0  -2 -20 26033.8 644.073  11
   0   2  20 25925.9 625.762  10
   0  -2 -20 23855.5 548.297   4
   0   2 -20 25559.4 697.763   5
   0   2 -20 26231.7 560.670   3
   0  -2  20 24892.0 525.211   9
   0   2  20 24854.2 600.875   2
   0  -2 -20 26622.0 610.136   2
   0  -2 -20 24748.9 711.965   5
   0  -2  21 616.840 77.0173   1
   0   2 -21 725.326 78.5776  11
   0  -2 -21 674.698 88.9712  11
   0  -2  21 668.412 62.1421  10
   0   2  21 714.181 84.5773  10
   0  -2 -21 679.287 62.3724   4
   0   2 -21 575.949 98.8569   5
   0   2 -21 822.596 66.6512   3
   0  -2  21 708.049 52.9826   9
   0  -2 -21 713.191 77.3982   2
   0  -2  21 560.431 75.2142   2
   0   2  21 782.981 79.4335   2
   0  -2 -21 758.466 115.077   5
   0  -2  22 10405.0 332.035   1
   0   2 -22 11089.3 329.922  11
   0  -2 -22 11210.2 361.851  11
   0   2  22 11174.1 344.213  10
   0  -2  22 10889.8 285.775  10
   0  -2 -22 9461.20 274.750   4
   0   2 -22 11003.9 291.246   3
   0   2 -22 10237.1 404.064   5
   0  -2  22 10462.9 259.189   9
   0  -2 -22 11000.5 332.359   2
   0   2  22 9813.62 322.255   2
   0  -2  22 10181.5 330.345   2
   0  -2 -22 9847.58 408.063   5
   0  -2  23 1177.65 104.683   1
   0  -2 -23 1085.56 111.123  11
   0   2 -23 1201.56 102.184  11
   0   2  23 963.983 102.340  10
   0  -2  23 1061.94 80.3810  10
   0  -2 -23 919.163 76.1012   4
   0   2 -23 1016.53 80.5084   3
   0  -2  23 1113.01 68.8480   9
   0  -2 -23 1232.35 105.576   2
   0   2  23 1026.68 97.1829   2
   0  -2  23 1018.61 101.001   2
   0   2 -23 935.042 133.725   5
   0  -2 -23 936.886 134.378   5
   0  -2  24 24024.5 606.872   1
   0  -2 -24 25208.2 636.600  11
   0   2 -24 24634.8 596.482  11
   0  -2  24 24298.2 537.673  10
   0   2  24 24242.1 601.361  10
   0   2 -24 24566.4 544.842   3
   0  -2 -24 21179.3 525.008   4
   0  -2  24 23405.2 505.981   9
   0   2 -24 23270.8 702.602   5
   0  -2 -24 22910.3 715.811   5
   0  -2  24 23254.1 603.099   2
   0  -2 -24 25106.2 602.371   2
   0  -2  25 2047.56 140.813   2
   0  -2 -25 2544.58 153.539   2
   0  -2  25 2278.43 147.339   1
   0  -2 -25 2464.15 165.427  11
   0   2 -25 2385.33 145.130  11
   0  -2  25 2404.31 119.241  10
   0   2  25 2261.39 145.776  10
   0  -2 -25 2066.86 111.150   4
   0   2 -25 2417.70 120.772   3
   0  -2  25 2105.20 97.2699   9
   0   2  25 1989.55 166.674   6
   0  -2 -25 2191.49 198.255   5
   0   2 -25 1938.54 181.859   5
   0  -2 -26 4231.31 200.695   2
   0   2 -26 4080.52 163.779   3
   0  -2  26 4110.92 204.344   1
   0   2 -26 4296.60 200.361  11
   0   2  26 4065.22 195.304  10
   0  -2  26 4281.21 163.181  10
   0  -2 -26 3915.45 155.296   4
   0  -2  26 3787.63 137.545   9
   0   2  26 4161.86 235.442   6
   0  -2 -26 3648.10 254.524   5
   0   2 -26 4263.22 265.194   5
   0   2  27 45.0987 55.0043  10
   0  -2  27-9.47979 45.3037  10
   0   2 -27-10.0516 82.0430   5
   0  -2  27 18.0654 34.5370   9
   0  -2  27 5.70969 57.2805   1
   0   2 -27 72.6539 36.6130   3
   0  -2  28 139.452 40.4809   9
   0   2  28 164.521 61.7566  10
   0  -2  28 173.011 51.6878  10
   0   2 -28 202.729 49.5046   3
   0   2  29 5.00071 59.8336  10
   0   4   0 123172. 2245.94   1
   0  -4   0 127092. 2253.46   1
   0   4   0 122013. 2316.53   5
   0  -4   0 120977. 2295.10   5
   0   4   0 122106. 2289.50   8
   0  -4   0 124615. 2294.34   7
   0  -4   0 124529. 2303.84   6
   0   4   0 116840. 2285.24   7
   0  -4   0 123152. 2298.75   3
   0  -4   1 53285.8 1020.97   3
   0  -4   1 53896.6 970.119   1
   0   4   1 51164.6 976.477   1
   0  -4  -1 52712.5 983.309   1
   0  -4   1 50999.8 1013.94  11
   0   4   1 52327.3 1018.03   8
   0   4  -1 54146.8 1011.25   8
   0  -4  -1 51880.8 1014.17   7
   0  -4  -1 52748.3 1030.89   6
   0   4   1 47465.7 1004.92   7
   0   4  -1 49879.9 1008.50   7
   0   4  -1 50818.3 1027.28   5
   0  -4  -1 54536.9 1029.97   5
   0   4   1 52044.1 1044.18   5
   0  -4   2 26468.2 557.433   3
   0   4   2 26482.5 521.951   1
   0  -4   2 26842.8 501.587   1
   0  -4  -2 26741.0 528.349   1
   0  -4   2 26694.4 547.090  11
   0   4  -2 26211.4 540.656   8
   0   4   2 24124.5 541.516   7
   0  -4  -2 25363.8 547.307   7
   0   4  -2 26374.1 547.714   7
   0  -4  -2 26685.7 569.398   6
   0  -4  -2 26779.7 569.421   5
   0   4   2 27438.4 587.258   5
   0   4  -2 24945.8 556.556   5
   0  -4   3 14341.8 331.877   3
   0  -4   3 14225.4 277.502   1
   0   4   3 13514.4 304.984   1
   0  -4  -3 14166.8 312.926   1
   0  -4   3 13803.5 316.495  11
   0  -4   3 14662.8 327.943   8
   0   4  -3 14291.4 317.000   8
   0   4  -3 14276.3 328.760   7
   0  -4  -3 13853.6 344.632   6
   0  -4  -3 13881.0 327.648   7
   0  -4  -3 13472.8 345.808   5
   0   4   3 13600.4 360.717   5
   0   4  -3 13234.3 326.068   5
   0  -4   4 13.2952 17.1125   3
   0   4   4 22.0741 15.8057   1
   0  -4  -4 21.6470 16.7896   1
   0  -4   4 50.8447 10.3186   1
   0  -4   4 29.4857 17.2921  11
   0   4  -4 57.2150 25.5704  11
   0  -4   4 55.9364 21.6806   8
   0   4  -4 8.77238 19.5525   7
   0   4   4 24.7019 23.3472   6
   0  -4  -4 31.1586 22.9588   7
   0  -4  -4 48.3263 26.2258   6
   0   4   4 24.2219 28.8469   5
   0  -4  -5 26184.8 555.527   3
   0  -4   5 27784.2 565.852   3
   0   4   5 26569.4 549.909   1
   0  -4  -5 26532.8 557.066   1
   0  -4   5 26330.4 542.250  11
   0   4  -5 25809.9 563.000  11
   0  -4   5 27025.2 556.008   8
   0   4   5 27954.8 592.498   6
   0  -4  -5 27253.3 566.971   7
   0  -4  -5 25281.1 585.689   6
   0   4   5 26903.7 614.781   5
   0  -4  -5 24144.9 588.812   5
   0   4   6 42058.0 852.496   1
   0  -4  -6 43376.7 858.938   1
   0  -4   6 41971.6 837.114  11
   0   4  -6 42365.2 862.534  11
   0   4  -6 42738.7 847.359  10
   0  -4   6 42966.4 857.326   3
   0   4   6 43659.6 854.312   4
   0  -4   6 43526.3 853.641   8
   0   4   6 43823.7 895.740   6
   0  -4  -6 42652.0 863.873   7
   0   4   6 41483.1 916.996   5
   0  -4  -7 12363.3 285.405   2
   0  -4   7 12492.6 294.513   2
   0   4   7 12464.1 306.808   1
   0  -4   7 12188.9 286.512  11
   0   4  -7 12478.1 308.683  11
   0   4  -7 12669.8 297.058  10
   0   4  -7 12316.9 254.197   9
   0   4   7 12385.5 296.593   4
   0  -4   7 12484.2 304.373   3
   0  -4   7 12668.5 303.431   8
   0   4   7 12280.7 336.876   6
   0  -4  -7 12272.5 312.721   7
   0   4   7 12254.1 359.013   5
   0  -4  -8 60968.5 1194.78   2
   0  -4   8 63229.7 1206.75   2
   0   4   8 62503.6 1222.59   1
   0   4  -8 61471.7 1218.89  11
   0  -4   8 63175.7 1196.18  11
   0   4  -8 61218.7 1202.59  10
   0  -4   8 62668.2 1212.23   3
   0   4   8 64696.8 1205.43   4
   0   4  -8 61539.1 1150.97   9
   0  -4   8 63826.0 1215.45   8
   0  -4  -8 60957.1 1228.79   7
   0   4   8 62722.7 1263.09   6
   0   4   8 63306.6 1298.05   5
   0  -4   9 11319.7 276.531   2
   0  -4  -9 10449.8 265.454   2
   0   4   9 10337.7 285.756   1
   0  -4   9 10963.8 266.458  11
   0   4  -9 10969.0 282.426  11
   0   4  -9 10743.1 265.743  10
   0  -4   9 10926.5 275.052   3
   0   4   9 11229.4 267.065   4
   0   4  -9 10422.6 222.703   9
   0  -4   9 10834.8 276.593   8
   0  -4  -9 10612.8 291.992   7
   0   4   9 10598.3 316.231   6
   0   4   9 10879.8 342.548   5
   0  -4  10 11688.0 291.081   2
   0  -4 -10 11074.2 279.433   2
   0   4  10 10910.5 300.059   1
   0  -4  10 11355.6 281.166  11
   0   4 -10 11271.3 293.436  11
   0   4 -10 10291.7 275.076  10
   0  -4  10 11057.2 282.202   3
   0   4  10 11528.8 273.891   4
   0   4 -10 11417.0 234.163   9
   0   4  10 11253.0 331.793   6
   0  -4 -10 11076.7 306.911   7
   0   4  10 11233.2 355.532   5
   0  -4  11 1480.72 83.8478   2
   0   4 -11 1519.03 85.5932   3
   0   4 -11 1481.21 85.1251  11
   0  -4  11 1559.29 81.7877  11
   0   4 -11 1406.62 75.6174  10
   0   4  11 1459.20 90.7813   1
   0   4  11 1386.70 71.6896   4
   0   4  11 1460.24 104.625   6
   0  -4 -11 1289.54 88.6588   7
   0   4  11 1414.08 114.595   5
   0   4 -12 1471.79 85.8324   3
   0  -4  12 1434.00 85.7921   2
   0  -4  12 1390.83 82.8154  11
   0   4 -12 1485.33 87.3621  11
   0   4 -12 1427.03 76.5048  10
   0   4  12 1374.01 92.5810   1
   0   4  12 1580.98 76.9745   4
   0   4  12 1552.26 111.233   6
   0  -4 -12 1482.48 96.7374   7
   0   4  12 1474.27 119.039   5
   0   4 -13 199.154 39.8962  11
   0  -4  13 218.759 41.5523  11
   0   4  13 216.819 45.4468   1
   0  -4  13 175.576 36.9061   2
   0  -4 -13 240.279 38.4119   2
   0   4  13 222.944 33.6911   4
   0   4  13 201.318 56.1065   5
   0   4  13 169.290 49.7102   6
   0   4 -13 204.929 39.4969   3
   0   4 -14 45312.5 933.254  11
   0  -4  14 47068.3 939.340  11
   0   4 -14 43246.3 905.007  10
   0   4  14 43970.3 954.804   1
   0  -4  14 45204.4 907.608   1
   0   4  14 45011.7 1034.16   5
   0   4  14 43059.3 993.602   6
   0  -4  14 44888.8 937.086   2
   0   4 -14 45958.2 927.104   3
   0  -4 -14 45847.1 924.351   2
   0  -4  15 368.205 56.8958  11
   0   4 -15 441.538 59.8135  11
   0   4 -15 432.608 52.4495  10
   0   4  15 420.546 63.5022   1
   0  -4  15 367.321 50.7537   1
   0   4  15 446.402 83.8561   5
   0   4  15 375.566 72.9401   6
   0  -4 -15 411.812 54.0961   2
   0   4 -15 566.970 61.6307   3
   0  -4  15 397.269 58.1290   2
   0   4 -16 12989.3 349.899  11
   0  -4  16 13011.4 359.894  11
   0   4 -16 12052.5 327.664  10
   0  -4  16 12850.2 334.265   1
   0   4  16 12596.4 371.575   1
   0   4  16 13130.1 428.848   5
   0   4  16 11945.4 397.018   6
   0  -4  16 12743.5 353.798   2
   0   4 -16 13150.0 340.668   3
   0  -4 -16 13698.1 349.186   2
   0   4 -17 4230.82 173.598  11
   0   4 -17 3629.62 154.510  10
   0  -4  17 4081.63 162.822   1
   0   4  17 4296.38 190.890   1
   0   4  17 4463.52 231.947   5
   0   4  17 4166.65 212.154   6
   0  -4 -17 4407.85 173.724   2
   0   4 -17 4602.93 170.618   3
   0  -4  17 4153.83 175.765   2
   0  -4 -18 15736.2 400.551   2
   0  -4  18 15312.4 409.538   2
   0   4 -18 15598.6 389.685   3
   0   4 -18 15497.7 404.698  11
   0   4 -18 14373.8 383.906  10
   0  -4  18 15295.4 389.390   1
   0   4  18 14205.4 418.608   1
   0   4  18 15274.6 482.742   5
   0   4  18 14384.5 455.975   6
   0   4 -19 668.018 73.5374  11
   0   4  19 653.226 96.6215  10
   0   4 -19 609.035 69.3719  10
   0  -4  19 696.744 71.6695   1
   0   4  19 703.304 84.4535   1
   0   4  19 768.130 104.177   5
   0   4 -19 756.484 101.377   5
   0  -4 -19 760.567 74.1140   2
   0  -4  19 659.486 76.7986   2
   0   4 -19 798.854 72.3742   3
   0  -4 -19 655.854 108.533   5
   0   4  19 650.709 94.1518   6
   0   4 -20 323.127 60.0399  11
   0   4 -20 240.540 52.6294  10
   0   4  20 185.993 67.5677  10
   0  -4  20 228.496 49.8373   1
   0   4  20 226.522 62.5450   1
   0  -4 -20 303.686 57.1334   2
   0  -4  20 185.416 54.2725   2
   0   4  20 224.818 76.8648   5
   0   4 -20 238.866 70.1062   5
   0   4  20 214.733 66.9738   6
   0  -4 -20 222.713 80.4105   5
   0   4 -20 204.964 49.7347   3
   0  -4  21 1054.29 98.2975   2
   0   4 -21 1004.71 84.4078   3
   0  -4 -21 1052.15 93.7107   2
   0   4 -21 921.612 91.2541  11
   0   4  21 1130.68 116.374  10
   0  -4  21 1088.45 91.0277   1
   0   4  21 1095.60 105.803   1
   0   4 -21 999.903 122.587   5
   0   4  21 1101.06 119.960   6
   0  -4 -21 965.591 128.647   5
   0   4 -22 23363.0 550.617   3
   0  -4 -22 23835.7 576.111   2
   0  -4  22 23324.8 588.306   2
   0   4 -22 22970.0 575.816  11
   0   4  22 24150.0 641.238  10
   0   4  22 22078.4 601.921   1
   0  -4  22 22594.7 562.055   1
   0   4 -22 22092.8 658.513   5
   0   4  22 22110.9 641.535   6
   0  -4 -22 23383.6 704.223   5
   0   4 -23 116.534 63.6111  11
   0   4  23 59.9433 72.2609  10
   0  -4  23 118.741 58.0091   2
   0  -4 -23 84.6667 54.0303   2
   0   4  23 219.084 69.8066   1
   0  -4  23 67.3784 52.4244   1
   0   4 -23 115.419 87.8057   5
   0   4  23 74.8882 81.2446   6
   0  -4 -23 57.9199 86.7850   5
   0   4 -23 46.2371 49.6473   3
   0  -4 -24 20079.8 521.744   2
   0  -4  24 19225.9 531.035   2
   0   4 -24 21052.9 500.021   3
   0   4 -24 20363.1 529.998  11
   0   4  24 20285.9 577.602  10
   0   4  24 18783.3 547.433   1
   0  -4  24 19714.2 517.782   1
   0   4 -24 19752.1 618.166   5
   0   4  24 19068.4 591.064   6
   0  -4 -24 18097.0 631.365   5
   0   4 -25 215.209 68.9781  11
   0   4  25 258.853 89.2343  10
   0   4 -25 396.155 65.0496   3
   0  -4  25 303.869 73.7603   1
   0  -4 -25 388.191 75.4228   2
   0   4 -25 321.331 102.112   5
   0   4  26 9604.75 354.483  10
   0  -4  26 9036.44 310.771   1
   0   4 -26 9297.86 291.009   3
   0   4 -26 9110.43 401.479   5
   0   4 -27-4.09919 50.4828   3
   0  -4  27-5.18693 53.4803   1
   0   4 -28 5152.87 204.734   3
   0  -6   0 11331.5 254.187   1
   0  -6   0 11108.6 307.428  11
   0   6   0 11271.7 300.390   8
   0   6   0 11357.1 299.148   7
   0   6   0 11088.0 333.008   5
   0  -6   1 2171.99 111.754   3
   0   6   1 2062.94 76.6724   1
   0  -6  -1 2070.43 81.6523   1
   0  -6   1 2171.93 74.8708   1
   0  -6   1 2144.44 109.651  11
   0  -6  -1 2017.66 111.931  11
   0   6   1 1953.88 106.490   8
   0  -6  -1 2076.83 108.390   7
   0   6  -1 2073.38 103.674   8
   0   6   1 2163.06 105.937   7
   0   6  -1 2250.15 107.742   7
   0  -6  -1 2189.94 112.484   5
   0   6   1 1972.91 124.097   5
   0   6  -1 2057.99 121.445   5
   0  -6   2 35602.8 761.816   3
   0  -6   2 36273.6 681.983   1
   0  -6  -2 35852.9 710.366   1
   0   6   2 35169.8 701.378   1
   0  -6   2 35571.1 748.900  11
   0   6  -2 35014.6 740.868   8
   0   6   2 35262.0 761.585   8
   0   6  -2 36225.2 750.965   7
   0  -6  -2 34236.3 753.352   7
   0   6   2 36070.3 749.417   7
   0   6   2 35765.4 804.838   5
   0  -6  -2 35770.2 767.480   5
   0   6  -2 34749.6 780.601   5
   0   6  -3 1020.72 77.0785   3
   0  -6   3 1122.24 80.8148   3
   0   6   3 1030.80 60.1018   1
   0  -6   3 1088.55 44.9940   1
   0  -6  -3 1004.94 62.4125   1
   0  -6   3 1001.97 71.8331  11
   0   6   3 1217.53 86.8602   8
   0   6  -3 1033.04 69.8350   8
   0   6  -3 1397.52 84.1231   7
   0  -6  -3 1040.67 78.4657   7
   0   6   3 1153.95 79.0025   7
   0   6  -3 971.163 82.2551   5
   0  -6  -3 1120.82 86.2273   5
   0   6   3 1459.28 107.842   5
   0  -6  -4 1068.77 78.7219   3
   0  -6   4 1090.88 79.0118   3
   0  -6  -4 1155.92 69.5043   1
   0  -6   4 1140.51 44.3357   1
   0   6   4 1166.47 65.6992   1
   0  -6   4 1167.07 74.5856  11
   0   6  -4 1133.01 72.6583   8
   0   6  -4 1229.57 81.5750   7
   0   6   4 1266.65 82.4726   7
   0  -6  -4 1415.71 99.5809   6
   0  -6  -4 1002.97 77.4411   7
   0  -6  -4 970.746 84.2961   5
   0   6  -4 1135.75 85.9515   5
   0   6   4 1124.43 99.5309   5
   0  -6  -5 159.671 39.1253   3
   0  -6   5 157.307 37.7998   3
   0  -6   5 185.052 33.8149  11
   0  -6   5 182.321 18.0646   1
   0   6   5 238.389 34.4673   1
   0  -6  -5 189.180 34.6696   1
   0   6  -5 183.737 42.1530   7
   0  -6  -5 237.276 45.1071   7
   0   6   5 194.927 41.6596   7
   0   6   5 279.410 57.8096   5
   0  -6  -5 247.582 48.5189   6
   0   6  -5 321.988 49.7844   5
   0  -6  -5 232.834 52.7275   5
   0  -6  -6 19955.0 464.889   3
   0  -6   6 19606.6 439.199  11
   0  -6   6 19116.6 463.995   3
   0   6   6 19074.6 436.850   1
   0  -6   6 18891.5 378.516   1
   0   6  -6 20234.3 472.337   7
   0  -6  -6 19800.3 471.306   7
   0  -6  -6 20317.8 503.517   6
   0  -6  -6 19632.0 499.223   5
   0   6   6 19497.4 530.350   5
   0   6  -6 18524.3 468.082   5
   0  -6  -7 12849.7 340.135   3
   0   6   7 12807.6 324.132   1
   0  -6   7 12691.8 265.387   1
   0  -6   7 12803.4 318.144  11
   0  -6   7 12909.3 342.950   3
   0   6  -7 13812.0 358.286   7
   0  -6  -7 13045.3 379.778   6
   0   6   7 13324.7 373.507   6
   0  -6  -7 13112.5 350.986   7
   0   6   7 12878.8 404.552   5
   0   6  -7 12766.1 346.923   5
   0  -6  -7 12497.7 378.960   5
   0  -6  -8 81219.6 1607.97   3
   0   6  -8 84780.0 1619.82   3
   0  -6   8 81902.7 1578.16   2
   0  -6  -8 79549.1 1563.25   2
   0   6   8 80375.8 1594.08   1
   0  -6   8 82958.4 1518.00   1
   0  -6   8 81419.8 1575.93  11
   0   6  -8 81674.8 1627.16  11
   0   6  -8 81323.1 1594.48  10
   0   6  -8 83371.8 1530.33   9
   0  -6   8 81282.2 1611.02   3
   0   6  -8 88479.0 1635.85   7
   0  -6  -8 83200.3 1626.79   7
   0  -6  -8 84353.2 1670.94   6
   0   6   8 82939.5 1656.85   6
   0   6   8 83908.6 1707.60   5
   0  -6  -8 81310.9 1670.98   5
   0   6  -8 78982.1 1612.68   5
   0  -6  -9 114.811 43.0043   3
   0  -6   9 138.211 42.9624   3
   0   6  -9 129.044 45.6080   3
   0  -6   9 100.728 32.7035   2
   0   6   9 81.0164 40.8551   1
   0  -6   9 121.093 36.6828  11
   0   6  -9 110.262 47.5170  11
   0   6  -9 218.569 47.6107  10
   0  -6   9 170.646 46.5177   8
   0   6  -9 73.8977 22.4641   9
   0  -6  -9 70.6781 43.6625   7
   0   6   9 122.191 54.8569   6
   0   6   9 97.6883 59.9739   5
   0  -6  -9 109.321 56.8377   5
   0   6 -10 64525.1 1250.00   3
   0  -6 -10 61055.7 1231.58   3
   0  -6  10 62137.1 1212.99   2
   0   6  10 59980.1 1229.57   1
   0  -6  10 61986.7 1205.98  11
   0   6 -10 61757.6 1253.83  11
   0   6 -10 61441.0 1216.47  10
   0  -6  10 61644.4 1232.11   3
   0   6 -10 59314.8 1142.19   9
   0  -6  10 63140.7 1233.30   8
   0  -6 -10 61775.8 1256.58   7
   0   6  10 62686.2 1293.43   6
   0   6  10 62211.2 1340.24   5
   0  -6 -10 58697.7 1304.36   5
   0   6 -11 14.9876 34.2761   3
   0  -6 -11 63.5637 38.2134   3
   0  -6  11 26.1727 32.8318   3
   0  -6  11 21.1746 30.1441   2
   0   6  11 39.1124 35.4287   1
   0   6 -11 63.1774 44.3582  11
   0  -6  11 45.4552 33.7010  11
   0   6 -11 75.9619 34.6203  10
   0   6  11 105.524 57.7074   5
   0   6 -11 54.0089 18.0406   9
   0  -6  11 44.4136 40.2755   8
   0  -6 -11 28.0199 41.0049   7
   0   6  11 97.4505 50.7308   6
   0  -6 -11 93.3347 51.9794   5
   0  -6 -12 1979.22 99.5734   2
   0  -6 -12 1654.58 103.503   3
   0  -6  12 1797.78 104.719   2
   0   6 -12 2018.89 118.437   3
   0   6  12 1878.96 113.296   1
   0   6 -12 2170.45 124.872  11
   0  -6  12 2043.74 104.065  11
   0   6 -12 1961.13 102.193  10
   0  -6  12 2008.41 109.118   3
   0   6 -12 1948.37 64.4490   9
   0  -6  12 2038.67 113.610   8
   0   6  12 1800.88 131.209   6
   0  -6 -12 1874.06 121.328   7
   0  -6 -12 2000.43 146.914   5
   0   6  12 1970.11 154.081   5
   0   6 -13 2079.08 119.185   3
   0  -6 -13 1964.34 100.413   2
   0  -6 -13 1742.95 108.645   3
   0  -6  13 1726.89 103.599   2
   0  -6  13 1919.18 104.137  11
   0   6 -13 1906.34 119.445  11
   0   6 -13 1765.73 96.6052  10
   0   6  13 1823.06 114.117   1
   0  -6  13 1779.19 81.3654   1
   0  -6  13 1828.93 110.002   8
   0   6  13 1710.54 130.810   6
   0  -6 -13 1821.07 119.773   7
   0   6  13 2032.03 157.778   5
   0  -6 -13 1777.53 142.968   5
   0  -6  14 11274.7 325.300   2
   0   6 -14 12869.4 348.937   3
   0  -6 -14 11542.9 311.062   2
   0  -6  14 11997.4 322.752  11
   0   6 -14 11959.5 347.454  11
   0   6 -14 11407.8 306.970  10
   0  -6  14 11622.9 286.328   1
   0   6  14 11290.9 341.020   1
   0  -6  14 12164.6 334.741   8
   0   6  14 11470.4 382.954   6
   0  -6 -14 11383.8 352.468   7
   0   6  14 11640.5 417.019   5
   0  -6 -14 11596.2 406.335   5
   0  -6  15 18636.9 466.534   2
   0   6 -15 20254.3 487.041   3
   0  -6 -15 19146.0 450.326   2
   0   6  15 17684.5 480.139   1
   0  -6  15 18635.7 419.825   1
   0   6 -15 19473.2 487.294  11
   0  -6  15 19112.1 464.090  11
   0   6 -15 17205.8 432.498  10
   0  -6  15 18147.8 462.066   8
   0  -6 -15 17924.0 490.262   7
   0   6  15 17733.8 523.404   6
   0  -6 -15 17962.4 554.553   5
   0   6  15 19031.1 572.352   5
   0   6 -16 39868.4 824.831   3
   0  -6  16 35978.9 804.231   2
   0  -6 -16 36445.6 785.633   2
   0  -6  16 37130.9 756.840   1
   0   6  16 35603.0 826.708   1
   0   6 -16 38552.2 830.689  11
   0  -6  16 39372.1 811.599  11
   0   6 -16 33449.3 764.095  10
   0   6  16 37989.0 937.026   5
   0  -6  16 36868.5 800.533   8
   0  -6 -16 34999.7 833.241   7
   0   6  16 34954.8 873.495   6
   0  -6 -16 34765.9 912.020   5
   0  -6  17 4860.01 197.864   2
   0  -6 -17 5130.30 190.683   2
   0   6 -17 5308.48 208.064   3
   0  -6  17 4900.60 167.225   1
   0   6  17 4457.30 205.208   1
   0  -6  17 5054.01 200.051  11
   0   6 -17 4899.72 207.475  11
   0   6 -17 4431.00 171.721  10
   0   6  17 4920.54 264.688   5
   0  -6  17 4811.39 191.198   8
   0   6  17 4609.44 235.062   6
   0  -6 -17 4262.35 207.067   7
   0  -6 -17 4673.78 254.987   5
   0  -6  18 2517.11 140.469   2
   0   6 -18 2599.88 142.792   3
   0  -6 -18 2506.03 131.249   2
   0  -6  18 2252.54 111.939   1
   0   6  18 2427.25 150.221   1
   0  -6  18 2206.39 134.897  11
   0   6 -18 2419.99 146.471  11
   0   6 -18 2335.02 119.746  10
   0   6  18 2245.89 180.628   5
   0  -6  18 2633.68 137.883   8
   0   6  18 2393.84 168.252   6
   0  -6 -18 2359.62 151.724   7
   0  -6 -18 2394.64 184.779   5
   0   6 -19 140.081 51.6836   3
   0  -6 -19 159.835 49.2051   2
   0  -6  19 145.643 52.0554   2
   0  -6  19 181.693 43.2714   1
   0   6  19 250.762 65.7708   1
   0   6 -19 135.404 59.1778  11
   0  -6  19 143.503 53.8052  11
   0   6 -19 167.176 46.0794  10
   0   6  19 127.203 70.7337   5
   0  -6  19 163.146 53.2732   8
   0  -6 -19 122.355 59.2955   7
   0   6  19 266.959 69.0325   6
   0  -6 -19 120.593 70.3666   5
   0  -6  20 7355.36 265.514   2
   0  -6 -20 7488.07 252.786   2
   0   6 -20 8107.35 270.631   3
   0   6  20 6823.20 275.636   1
   0  -6  20 7288.83 234.221   1
   0   6 -20 7852.28 281.725  11
   0   6 -20 6879.55 236.684  10
   0   6  20 7392.01 342.174   5
   0  -6  20 7379.04 252.320   8
   0  -6 -20 6871.99 281.832   7
   0   6  20 7238.52 313.111   6
   0  -6 -20 7384.05 345.615   5
   0  -6 -21 4600.73 190.382   2
   0   6 -21 4736.93 203.402   3
   0  -6  21 4788.31 207.085   2
   0  -6  21 4249.81 171.324   1
   0   6  21 4259.07 212.981   1
   0   6  21 4632.71 261.245  10
   0   6 -21 4466.61 210.925  11
   0   6 -21 4054.37 174.657  10
   0   6  21 4744.13 269.385   5
   0  -6  21 4373.64 190.103   8
   0  -6 -21 4023.40 213.207   7
   0   6  21 4384.68 241.448   6
   0  -6 -21 3912.76 255.269   5
   0   6  22 4998.05 237.986   1
   0  -6  22 5094.77 194.792   1
   0   6 -22 5539.39 238.243  11
   0   6  22 5385.81 281.634  10
   0   6 -22 4788.40 195.800  10
   0   6 -22 5108.63 265.134   5
   0  -6  22 5181.27 209.053   8
   0  -6 -22 4749.84 234.198   7
   0  -6 -22 5444.44 215.994   2
   0   6 -22 5807.32 225.689   3
   0  -6  22 5114.59 222.574   2
   0   6 -23 3298.03 215.952   5
   0  -6  23 2859.30 145.360   1
   0  -6  23 3231.26 164.089   8
   0   6 -23 3630.35 194.348  11
   0  -6 -23 3319.96 170.242   2
   0   6 -23 3119.93 166.779   3
   0   6 -24 5351.84 286.243   5
   0  -6  24 5291.42 207.186   1
   0  -6  24 5450.59 221.623   8
   0   6 -24 5452.29 247.671  11
   0   6 -24 5852.61 231.492   3
   0  -6 -24 5291.85 223.710   2
   0  -6  25 104.566 53.9296   1
   0   6 -25 241.519 68.8222   3
   0   6 -25 113.927 86.0791   5
   0  -6  26 464.140 72.4776   1
   0  -6  27 93.0837 52.0017   1
   0   8   0 112087. 2256.06   8
   0  -8   0 117733. 2271.89  11
   0   8   0 122901. 2264.69   7
   0  -8   0 118784. 2297.53   6
   0   8   0 116506. 2332.99   5
   0   8  -1 124.262 48.2876   8
   0   8   1 194.383 55.2369   8
   0  -8  -1 161.478 60.4484  11
   0  -8   1 201.902 55.2575  11
   0   8  -1 187.503 57.1500   7
   0   8   1 154.407 54.0459   7
   0   8   1 145.016 68.7796   5
   0  -8   1 126.901 59.1850   6
   0   8  -1 192.209 69.5669   5
   0  -8  -1 201.756 61.7738   6
   0  -8   2 8544.05 281.715   3
   0  -8   2 8388.76 267.896  11
   0  -8  -2 8395.78 286.066  11
   0  -8  -2 8143.62 272.932   7
   0   8   2 8418.85 279.029   8
   0   8  -2 8671.51 265.825   8
   0   8   2 8818.53 273.555   7
   0  -8  -2 8807.58 300.456   6
   0  -8   2 8600.46 289.200   6
   0   8   2 8909.51 327.688   5
   0   8  -2 8580.99 311.726   5
   0  -8   3 1521.43 106.673   3
   0  -8  -3 1287.37 99.2609   3
   0   8   3 1409.44 71.2973   1
   0  -8  -3 1186.94 104.501  11
   0  -8   3 1472.80 97.7948  11
   0  -8  -3 1293.45 100.916   7
   0   8  -3 1074.83 86.0600   8
   0   8   3 1297.29 101.199   8
   0   8   3 1281.64 96.5010   7
   0  -8   3 1364.24 105.595   6
   0   8  -3 1593.50 103.071   7
   0  -8  -3 1448.55 114.336   6
   0   8   3 1442.47 127.400   5
   0   8  -3 1260.98 115.261   5
   0  -8  -3 1359.34 104.304   5
   0  -8   4 6842.02 252.590   3
   0  -8  -4 7350.77 257.587   3
   0   8   4 7514.74 205.423   1
   0  -8   4 7630.63 239.626  11
   0   8   4 7645.50 266.734   8
   0   8  -4 7187.77 233.782   8
   0   8   4 7810.82 254.389   7
   0  -8  -4 7964.34 283.487   6
   0   8  -4 7715.71 253.024   7
   0  -8   4 7417.44 259.404   6
   0  -8  -4 7479.77 258.468   7
   0  -8  -4 7485.37 264.386   5
   0   8   4 7465.03 299.426   5
   0   8  -4 6907.36 272.137   5
   0  -8  -5 7686.28 265.945   3
   0  -8   5 7594.11 262.740   3
   0  -8   5 7916.77 243.908  11
   0   8   5 7602.20 217.925   1
   0   8   5 7938.56 277.734   8
   0   8  -5 8379.11 265.628   7
   0  -8  -5 7693.45 286.701   6
   0  -8  -5 7444.97 261.666   7
   0   8   5 7859.78 259.312   7
   0  -8   5 8069.56 268.389   6
   0  -8  -5 7760.07 277.635   5
   0   8  -5 7448.19 280.015   5
   0   8   5 8094.13 317.952   5
   0  -8  -6 29234.6 676.372   3
   0  -8   6 28599.2 633.218  11
   0   8   6 29127.0 681.861   4
   0  -8   6 27736.1 663.754   3
   0   8   6 27934.6 611.409   1
   0   8   6 28148.3 685.008   8
   0  -8  -6 28722.9 671.820   7
   0  -8  -6 28675.9 706.528   6
   0   8  -6 30555.5 672.432   7
   0   8  -6 27050.3 683.842   5
   0   8   6 29437.7 749.961   5
   0  -8  -6 28642.9 695.105   5
   0  -8   7 6783.50 205.880   2
   0  -8  -7 6956.32 249.588   3
   0  -8   7 6444.23 214.092  11
   0   8   7 6708.50 210.012   1
   0   8   7 6962.38 252.183   4
   0  -8   7 6558.62 239.853   3
   0  -8  -7 6683.38 271.531   6
   0   8  -7 7206.02 249.365   7
   0  -8  -7 6548.46 243.436   7
   0   8   7 6910.10 298.749   5
   0  -8  -7 6430.69 260.491   5
   0   8  -7 6580.76 254.455   5
   0  -8  -8 11275.5 340.552   3
   0   8  -8 11036.9 342.023   3
   0  -8   8 11226.8 297.640   2
   0   8   8 10780.0 303.791   1
   0  -8   8 11250.3 308.208  11
   0   8  -8 11029.5 326.816  10
   0   8   8 11657.4 344.272   4
   0  -8   8 11176.8 337.078   3
   0  -8  -8 11139.1 342.710   7
   0  -8  -8 12567.2 392.404   6
   0   8  -8 12455.3 354.588   7
   0   8   8 11255.6 406.587   5
   0  -8  -8 10835.6 364.700   5
   0   8  -8 10684.9 345.090   5
   0  -8   9 12427.3 330.515   2
   0   8  -9 13262.8 379.389   3
   0  -8  -9 12760.3 370.402   3
   0   8   9 12700.5 340.468   1
   0  -8   9 12810.5 335.951  11
   0   8  -9 12335.2 353.875  10
   0   8  -9 12612.0 288.530   9
   0  -8   9 12831.0 368.654   3
   0   8   9 13137.1 368.672   4
   0  -8   9 13217.5 362.758   8
   0  -8  -9 12165.3 371.378   7
   0  -8  -9 13277.1 421.514   6
   0   8  -9 14235.3 390.822   7
   0  -8  -9 12036.2 398.354   5
   0   8  -9 12488.4 381.449   5
   0   8   9 12471.9 440.142   5
   0  -8 -10 346.026 46.4025   2
   0   8 -10 329.145 65.3726   3
   0  -8  10 304.369 56.3938   3
   0  -8 -10 273.264 58.0609   3
   0   8  10 370.801 58.1400   1
   0  -8  10 329.006 50.3030   2
   0  -8  10 587.049 63.5699  11
   0   8 -10 384.740 65.7234  10
   0   8  10 360.336 64.4351   4
   0  -8  10 344.503 62.6714   8
   0   8 -10 293.780 35.2364   9
   0  -8 -10 337.065 65.2393   7
   0   8 -10 310.379 64.8731   7
   0  -8 -10 406.872 76.6493   5
   0   8  10 251.460 81.8891   5
   0   8 -10 567.748 76.2462   5
   0  -8 -11 1454.73 108.743   3
   0   8 -11 1491.58 114.281   3
   0  -8 -11 1552.45 85.8592   2
   0  -8  11 1469.37 94.4757   2
   0  -8  11 1257.27 40.7528   1
   0   8  11 1453.38 99.5612   1
   0  -8  11 1239.66 41.3431   1
   0  -8  11 1446.58 92.5423  11
   0   8 -11 1385.62 101.625  10
   0  -8  11 1594.49 109.232   3
   0   8  11 1643.03 109.095   4
   0  -8  11 1610.54 109.574   8
   0   8 -11 1409.92 60.4214   9
   0  -8 -11 1525.45 116.606   7
   0   8 -11 1782.76 127.111   7
   0   8  11 1412.26 144.855   5
   0   8 -11 1447.41 112.030   5
   0  -8 -11 1447.40 126.115   5
   0  -8 -12 2544.63 144.292   3
   0  -8  12 2451.45 126.127   2
   0   8 -12 2767.58 152.485   3
   0  -8 -12 2614.76 116.460   2
   0  -8  12 2416.33 69.0586   1
   0  -8  12 2345.71 71.2493   1
   0   8  12 2470.19 132.013   1
   0  -8  12 2688.65 129.226  11
   0   8 -12 2517.40 132.555  10
   0   8  12 2817.77 138.011   4
   0  -8  12 2601.18 141.115   3
   0   8 -12 2308.09 78.9788   9
   0  -8  12 2761.31 143.287   8
   0   8 -12 2934.21 164.369   7
   0  -8 -12 2841.52 158.133   7
   0   8  12 2775.17 196.542   5
   0   8 -12 2689.41 152.957   5
   0  -8 -12 2617.34 173.625   5
   0  -8  13 3694.50 158.841   2
   0   8 -13 4021.52 184.562   3
   0  -8 -13 3835.95 146.402   2
   0  -8 -13 3596.46 172.854   3
   0  -8  13 3303.26 96.6625   1
   0  -8  13 3353.40 93.5706   1
   0   8  13 3620.55 167.216   1
   0   8 -13 3848.50 192.241  11
   0  -8  13 3888.85 159.209  11
   0   8 -13 3333.77 154.691  10
   0  -8  13 3604.70 166.144   3
   0   8  13 3963.69 162.991   4
   0   8 -13 4052.36 196.919   7
   0  -8  13 3581.01 167.845   8
   0   8 -13 3408.57 95.3582   9
   0  -8 -13 3672.08 186.716   7
   0   8  13 3628.25 200.390   6
   0   8 -13 3740.50 181.346   5
   0  -8 -13 3067.90 199.258   5
   0   8  13 3738.47 232.171   5
   0   8 -14 7664.26 270.779   3
   0  -8  14 7261.59 243.202   2
   0  -8 -14 7387.94 226.194   2
   0  -8 -14 7233.09 258.331   3
   0  -8  14 6831.16 171.953   1
   0  -8  14 6698.73 166.388   1
   0   8  14 7015.98 253.501   1
   0   8 -14 7448.67 280.830  11
   0  -8  14 7764.27 241.528  11
   0   8 -14 6834.37 236.038  10
   0   8  14 7242.00 236.943   4
   0  -8  14 7549.83 256.678   8
   0   8 -14 8022.56 292.735   7
   0  -8 -14 7316.47 278.545   7
   0   8  14 7343.13 299.830   6
   0   8  14 7713.98 344.478   5
   0   8 -14 7277.87 268.528   5
   0  -8 -14 7540.36 318.638   5
   0  -8  15 3421.12 160.594   2
   0   8 -15 3677.86 180.296   3
   0  -8 -15 3396.29 144.916   2
   0  -8 -15 3482.45 170.396   3
   0  -8  15 3355.16 106.349   1
   0   8  15 3411.59 171.449   1
   0   8 -15 3614.00 191.652  11
   0  -8  15 3491.60 157.602  11
   0   8 -15 3056.46 149.083  10
   0   8  15 3548.74 153.168   4
   0   8 -15 3746.57 197.863   7
   0  -8  15 3509.67 168.532   8
   0   8  15 3155.68 195.496   6
   0  -8 -15 3525.23 188.195   7
   0  -8 -15 3330.56 213.528   5
   0   8  15 3574.64 235.837   5
   0  -8 -16 7673.93 266.227   3
   0  -8  16 7468.87 256.455   2
   0  -8 -16 7592.18 237.633   2
   0   8 -16 7496.16 274.696   3
   0  -8  16 6916.19 186.492   1
   0   8  16 7212.32 267.717   1
   0   8 -16 7803.91 292.796  11
   0  -8  16 7665.01 254.655  11
   0   8 -16 6727.64 235.496  10
   0   8  16 7906.62 240.142   4
   0  -8  16 7779.40 264.780   8
   0   8  16 7059.41 305.096   6
   0  -8 -16 7319.84 286.850   7
   0   8  16 7911.39 358.107   5
   0  -8 -16 7474.49 330.585   5
   0  -8 -17 4041.03 165.171   2
   0   8 -17 3975.06 192.246   3
   0  -8 -17 3809.53 182.163   3
   0  -8  17 3823.91 178.658   2
   0  -8  17 3712.22 124.831   1
   0   8  17 3756.16 189.329   1
   0   8 -17 4360.14 210.733  11
   0  -8  17 4044.95 180.400  11
   0   8 -17 3760.40 162.239  10
   0   8  17 3885.63 156.605   4
   0   8  17 4298.82 266.934   5
   0  -8  17 4235.68 187.199   8
   0   8  17 3820.83 222.676   6
   0  -8 -17 3835.55 203.728   7
   0  -8 -17 3681.15 234.426   5
   0  -8 -18 8075.33 279.757   3
   0   8 -18 8531.57 295.895   3
   0  -8 -18 8365.97 258.805   2
   0  -8  18 7799.76 273.501   2
   0   8  18 7416.20 283.778   1
   0  -8  18 7458.06 207.734   1
   0   8 -18 8601.70 313.082  11
   0  -8  18 8386.26 280.115  11
   0   8 -18 7343.30 246.681  10
   0   8  18 8325.99 241.958   4
   0  -8  18 8435.70 280.070   8
   0  -8 -18 7780.09 305.660   7
   0   8  18 7585.78 326.494   6
   0  -8 -18 8123.87 355.833   5
   0  -8  19 28.0943 49.2375   8
   0   8 -19 127.132 64.0648  11
   0  -8  19 67.5989 54.5392  11
   0  -8  19 15.3555 31.2362   1
   0   8  19 27.2027 52.2247   1
   0  -8  19 28.3216 52.7211   2
   0  -8 -19-7.62854 43.3233   2
   0  -8 -19 51.1258 46.9567   3
   0  -8  20 4853.32 206.827   8
   0  -8  20 4689.96 210.869  11
   0   8 -20 4915.03 235.615  11
   0  -8  20 4353.27 152.442   1
   0  -8  20 4699.96 207.892   2
   0  -8 -20 4735.75 190.500   2
   0  -8 -20 4381.44 198.044   3
   0  -8  21 1739.73 129.027   8
   0   8 -21 2202.98 161.442  11
   0  -8 -21 1963.52 133.476   3
   0  -8 -21 2025.86 124.548   2
   0  -8  22 8223.43 288.246   8
   0  -8 -22 7959.35 280.654   3
   0  -8 -22 8283.68 276.935   2
   0  -8 -23 7214.95 264.468   3
   0  -8 -23 7488.41 264.352   2
   0  10   0 4859.84 206.929   8
   0 -10   0 5285.99 217.783  11
   0  10   0 5264.26 216.972   7
   0 -10   0 5325.63 238.753   6
   0  10   0 5274.29 265.957   5
   0 -10  -1 7291.99 282.258   3
   0  10  -1 7859.21 270.357   8
   0  10   1 8033.69 279.998   8
   0 -10  -1 8188.64 288.104  11
   0 -10   1 8210.21 279.774  11
   0 -10   1 8555.21 310.257   6
   0  10  -1 8355.68 283.116   7
   0 -10  -1 8246.51 309.451   6
   0  10   1 8206.03 279.950   7
   0  10  -1 7674.11 325.751   5
   0  10   1 7690.06 330.549   5
   0 -10  -2 14615.1 435.405   3
   0  10  -2 14427.6 404.204   8
   0  10   2 14807.6 428.234   8
   0 -10  -2 14986.1 434.186  11
   0 -10   2 14615.2 411.886  11
   0  10   2 15966.0 430.771   7
   0  10  -2 15669.1 426.558   7
   0 -10   2 15448.0 448.576   6
   0 -10  -2 15621.8 463.127   6
   0  10  -2 15315.6 484.302   5
   0  10   2 15233.8 497.960   5
   0 -10  -3 5873.15 242.514   3
   0 -10   3 5454.63 234.587   3
   0 -10  -3 5540.74 238.929  11
   0 -10   3 5719.16 220.094  11
   0  10  -3 5574.54 214.673   8
   0  10   3 5266.62 228.263   8
   0 -10   3 5780.15 243.508   6
   0  10  -3 5892.85 231.887   7
   0  10   3 6095.70 235.902   7
   0 -10  -3 6080.44 261.687   6
   0  10  -3 5687.12 267.008   5
   0  10   3 5811.61 284.585   5
   0 -10  -4 7420.48 282.647   3
   0 -10  -4 8062.51 298.909  11
   0 -10   4 7314.28 254.063  11
   0 -10   4 7774.99 283.305   3
   0  10   4 7937.88 289.818   8
   0 -10  -4 7987.36 308.785   6
   0 -10   4 7861.03 290.495   6
   0  10   4 7675.69 273.453   7
   0  10  -4 8185.00 280.549   7
   0  10   4 7716.18 336.176   5
   0  10  -4 7985.24 318.726   5
   0 -10  -5 53.3476 49.6373   3
   0 -10   5 82.0239 51.8194   3
   0 -10   5 56.9730 44.3416  11
   0 -10  -5 89.6183 63.6381  11
   0  10   5 186.616 70.9719   4
   0 -10   5 120.362 40.1927   2
   0  10   5 97.9136 59.0278   8
   0 -10  -5 97.8622 56.5634   7
   0 -10   5 93.7333 58.5150   6
   0  10  -5 104.543 55.4599   7
   0 -10  -5 120.139 69.8348   6
   0  10   5 96.9318 73.2618   5
   0  10  -5 164.530 73.1047   5
   0 -10  -6 1507.33 82.0632   2
   0 -10  -6 1495.15 121.455   3
   0 -10   6 1383.42 85.5364   2
   0  10   6 1650.56 90.5995   1
   0 -10   6 1903.66 114.010  11
   0 -10  -6 1537.43 132.650  11
   0 -10   6 1491.27 118.078   3
   0  10   6 1813.72 141.090   4
   0  10   6 1460.37 128.089   8
   0 -10  -6 1588.18 125.865   7
   0 -10  -6 1697.76 143.962   6
   0 -10   6 1405.89 119.032   6
   0  10  -6 1762.93 123.728   7
   0 -10  -6 1523.90 128.619   5
   0  10   6 1469.17 155.106   5
   0  10  -6 1483.84 139.388   5
   0 -10   7 8895.85 252.792   2
   0 -10  -7 8775.64 237.174   2
   0 -10  -7 8721.16 311.124   3
   0  10   7 8704.05 250.367   1
   0 -10   7 8905.74 274.287  11
   0  10  -7 8372.16 297.322  10
   0  10   7 9160.45 322.610   4
   0 -10   7 8513.26 304.475   3
   0  10   7 8729.64 321.887   8
   0  10  -7 9649.10 312.130   7
   0 -10   7 8682.62 306.340   6
   0 -10  -7 8623.40 309.844   7
   0 -10  -7 9120.31 346.692   6
   0  10  -7 8563.90 332.183   5
   0 -10  -7 9215.36 326.689   5
   0  10   7 8733.61 373.828   5
   0 -10   8 14723.1 379.599   2
   0 -10  -8 15937.9 453.112   3
   0 -10  -8 15111.9 362.328   2
   0  10   8 15455.2 384.843   1
   0 -10   8 15982.7 403.663  11
   0  10  -8 15212.7 357.145   9
   0  10  -8 14783.9 430.915  10
   0  10   8 16529.1 462.102   4
   0 -10   8 15081.6 440.680   3
   0  10   8 15041.9 466.016   8
   0 -10  -8 15157.3 447.019   7
   0 -10   8 15559.0 442.701   6
   0  10  -8 16745.4 453.304   7
   0 -10  -8 16125.9 498.572   6
   0  10  -8 16365.7 485.386   5
   0 -10  -8 14966.3 461.039   5
   0  10   8 15686.0 532.544   5
   0 -10   9 11841.2 321.411   2
   0 -10  -9 12477.0 385.397   3
   0 -10  -9 11687.3 298.443   2
   0  10   9 11388.3 320.856   1
   0 -10   9 12093.5 332.860  11
   0  10  -9 11416.6 358.203  10
   0 -10   9 11723.5 371.304   3
   0  10   9 12467.3 382.714   4
   0  10   9 11739.8 397.973   8
   0  10  -9 13336.3 389.614   7
   0 -10  -9 11489.9 375.366   7
   0 -10   9 11878.4 369.329   6
   0 -10  -9 12226.1 400.518   5
   0  10   9 11972.2 452.705   5
   0  10  -9 12080.4 403.951   5
   0 -10 -10 10845.8 354.539   3
   0 -10  10 10680.5 301.188   2
   0 -10 -10 10515.4 276.702   2
   0  10  10 10552.4 304.810   1
   0 -10  10 10867.1 307.165  11
   0  10 -10 9547.06 325.135  10
   0  10  10 11223.7 350.720   4
   0  10  10 10581.6 372.857   8
   0 -10 -10 10451.3 355.651   7
   0  10 -10 12007.2 368.020   7
   0 -10 -10 10772.3 377.990   5
   0  10  10 11005.5 434.840   5
   0  10 -10 10389.4 366.763   5
   0 -10  11 1233.53 90.2770   2
   0 -10 -11 1230.86 112.532   3
   0 -10 -11 1380.38 83.5729   2
   0  10  11 1305.71 97.0270   1
   0 -10  11 1454.99 96.2542  11
   0  10 -11 1281.66 108.700  10
   0  10  11 1228.28 113.575   4
   0  10  11 1248.71 126.828   8
   0  10 -11 1521.27 124.979   7
   0 -10 -11 1183.08 115.057   7
   0  10 -11 1102.39 115.834   5
   0 -10 -11 1541.21 139.707   5
   0  10  11 1296.08 156.083   5
   0 -10 -12 1205.32 111.559   3
   0 -10  12 1271.77 92.3418   2
   0 -10 -12 1059.22 76.0790   2
   0 -10  12 1121.94 90.2971  11
   0  10 -12 964.147 94.3177  10
   0  10  12 974.348 87.4688   1
   0  10  12 1213.56 109.043   4
   0 -10 -12 1156.25 113.213   7
   0  10 -12 1344.24 123.735   7
   0 -10 -12 1174.96 126.478   5
   0  10 -12 1528.38 134.933   5
   0  10  13 1244.92 101.283   1
   0  10 -13 1115.25 101.122  10
   0 -10  13 1359.15 98.7649  11
   0  10  13 1162.72 104.955   4
   0 -10 -13 1392.87 119.385   3
   0 -10 -13 1278.95 83.5480   2
   0 -10  13 1217.75 96.4841   2
   0  10 -13 1228.39 124.477   5
   0 -10  14 4435.73 180.216  11
   0  10  14 4456.70 192.947   4
   0  10 -14 3989.26 184.595  10
   0 -10 -14 4520.01 214.105   3
   0 -10  14 4192.18 179.222   2
   0 -10 -14 4393.64 161.258   2
   0  10  14 4047.10 185.933   1
   0  10  15 7167.65 249.181   4
   0 -10  15 6970.82 242.179  11
   0  10  15 6578.90 249.223   1
   0 -10  15 6975.91 244.265   2
   0 -10  16 13077.3 386.192   8
   0 -10  16 13332.8 373.692  11
   0  10  16 12476.7 380.675   1
   0 -10  16 12844.7 370.974   2
   0 -10  17 1942.56 138.721   8
   0 -10  17 1925.95 130.923  11
   0 -10  17 1991.80 128.804   2
   0  10  17 1885.92 133.595   1
   0 -10  18 1098.98 107.776  11
   0 -12   0 12232.2 416.179   6
   0 -12   0 12548.0 381.461  11
   0  12   0 12435.8 381.411   8
   0 -12  -1 8375.06 331.835   6
   0 -12   1 8547.84 329.456   6
   0 -12  -1 8395.66 302.466  11
   0 -12   1 8723.08 299.257  11
   0  12  -1 8324.70 295.974   8
   0  12   1 8168.69 299.672   8
   0 -12   2 6231.05 273.632   6
   0 -12  -2 6111.52 252.466  11
   0 -12   2 5937.79 236.718  11
   0  12   2 6037.07 252.717   8
   0 -12  -3 50.0727 69.4731  11
   0 -12   3 4.41640 59.2563  11
   0 -12   3 30.8085 77.6370   6
   0  12   3 28.1698 67.7448   8
   0  12   4 1642.19 138.697   8
   0 -12   4 1725.16 122.237  11
   0 -12   4 1589.47 142.281   6
   0 -12   5 7377.11 254.234  11
   0 -12   5 6927.30 286.867   6
   0 -12   6 5398.80 211.559  11
   0 -12   7 7373.71 250.984  11
   0 -12   8 2748.67 143.549  11
   0 -12   9 1509.98 109.848  11
  -1  -1  30 8183.20 243.404   9
  -1   1  30 8344.92 268.628   9
  -1   1  29 1192.45 100.465   9
  -1  -1  29 1416.79 93.2639   9
   1   1 -29 1537.22 102.778   3
   1  -1 -29 1426.64 95.5431   3
  -1   1  29 1312.89 111.723  10
  -1   1  28 5980.14 224.043   9
  -1  -1  28 6696.60 208.553   9
   1   1 -28 6696.43 222.104   3
  -1   1  28 6753.88 240.706  10
  -1  -1  28 6695.66 219.168  10
  -1   1  27 2445.78 139.189  10
  -1  -1  27 2498.52 122.757  10
   1   1 -27 2396.78 122.712   3
  -1  -1  27 2260.61 112.205   9
  -1   1  27 2283.97 129.635   9
   1   1 -27 2135.63 197.179   5
  -1  -1  27 2510.39 161.046   1
  -1  -1  26 798.981 93.2404   2
  -1  -1  26 802.730 96.4085   1
  -1   1  26 796.723 100.232   1
   1   1 -26 1044.51 102.938  11
  -1   1  26 864.672 90.1121  10
  -1  -1  26 1068.15 80.7573  10
   1   1 -26 860.027 76.1771   3
   1  -1 -26 862.823 76.7971   4
  -1   1  26 694.029 78.7952   9
  -1  -1  26 812.195 69.9459   9
  -1   1  26 971.479 118.637   6
   1  -1 -26 720.909 122.582   5
   1   1 -26 806.798 134.586   5
  -1  -1  25 5679.31 240.958   2
   1  -1 -25 6498.01 252.646   2
  -1   1  25 5868.42 244.757   2
  -1   1  25 6194.57 261.149   1
  -1  -1  25 6267.16 255.230   1
   1  -1 -25 6397.33 263.445  11
   1   1 -25 6752.95 252.021  11
  -1  -1  25 6565.17 205.482  10
  -1   1  25 6315.10 229.812  10
   1   1 -25 6164.46 204.567   3
   1  -1 -25 5661.86 198.533   4
  -1   1  25 5962.94 216.603   9
  -1  -1  25 5921.67 192.467   9
  -1   1  25 5936.37 277.877   6
   1  -1 -25 5931.54 315.258   5
   1   1 -25 5519.90 304.655   5
  -1  -1  24 5732.24 236.269   2
   1  -1 -24 5855.21 234.787   2
  -1   1  24 5517.10 230.159   2
  -1  -1  24 5867.51 241.466   1
  -1   1  24 5800.40 246.336   1
   1  -1 -24 5810.83 250.133  11
   1   1 -24 6091.25 236.526  11
  -1   1  24 6024.73 220.851  10
  -1  -1  24 5794.80 192.783  10
   1   1 -24 6076.20 198.247   3
   1  -1 -24 5245.59 190.398   4
  -1  -1  24 5730.46 185.131   9
  -1   1  24 5637.63 264.753   6
   1  -1 -24 5537.29 300.723   5
   1   1 -24 5760.53 298.792   5
  -1   1  23 1852.99 129.623   2
   1  -1 -23 2091.38 136.265   2
  -1  -1  23 1980.56 134.424   2
  -1  -1  23 2049.05 135.406   1
  -1   1  23 2020.41 141.790   1
   1  -1 -23 2079.41 146.202  11
   1   1 -23 2008.80 131.478  11
  -1  -1  23 2038.64 107.014  10
  -1   1  23 2190.18 128.631  10
   1   1 -23 1936.18 105.749   3
   1  -1 -23 1790.52 105.631   4
  -1  -1  23 1991.36 102.677   9
  -1   1  23 2147.40 162.408   6
   1  -1 -23 1936.75 181.136   5
   1   1 -23 1979.41 171.645   5
  -1   1  22 19186.0 500.943   2
  -1  -1  22 18881.9 499.358   2
   1   1 -22 20594.8 514.473   2
   1  -1 -22 20072.6 506.869   2
  -1  -1  22 19014.8 506.498   1
  -1   1  22 19618.6 520.744   1
   1  -1 -22 19421.1 523.010  11
   1   1 -22 18633.7 492.529  11
  -1  -1  22 19694.0 449.247  10
  -1   1  22 20028.3 491.034  10
   1   1 -22 19776.5 450.030   3
   1  -1 -22 16694.6 440.047   4
  -1  -1  22 19377.1 440.916   9
  -1   1  22 19139.9 549.680   6
   1  -1 -22 18870.3 600.622   5
   1   1 -22 18412.2 582.498   5
   1  -1 -21 4.38584 47.0080   2
   1   1 -21 8.96695 46.5480   2
  -1   1  21 19.7842 50.3247   1
  -1  -1  21 13.7013 42.1332   1
   1  -1 -21 41.0710 55.0213  11
   1   1 -21 76.6047 48.8756  11
  -1   1  21 35.2920 51.3669  10
  -1  -1  21 93.6067 42.3771  10
   1  -1 -21 51.7115 38.8637   4
   1   1 -21 75.5237 62.9511   5
  -1  -1  21 97.3768 41.9494   9
  -1  -1  21 61.4868 48.2207   2
   1   1 -21 131.310 38.4151   3
  -1   1  21 91.0006 51.0853   2
  -1   1  21 96.9885 62.9258   6
   1  -1 -21 120.625 82.3676   5
  -1  -1  20 9105.65 293.368   1
   1   1 -20 8657.06 280.888  11
   1  -1 -20 8842.52 306.026  11
  -1   1  20 9068.33 280.202  10
   1   1 -20 9017.96 246.179   3
   1  -1 -20 8391.43 246.460   4
  -1  -1  20 9004.11 241.882   9
   1  -1 -20 9210.45 291.812   2
   1   1 -20 9373.02 292.987   2
  -1   1  20 8204.81 279.137   2
  -1  -1  20 8461.62 281.359   2
   1  -1 -20 8947.06 362.614   5
   1   1 -20 9265.07 353.935   5
  -1  -1  19 5329.93 208.309   1
   1   1 -19 5829.16 210.171  11
   1  -1 -19 5804.73 228.956  11
  -1   1  19 5360.23 201.953  10
   1   1 -19 5578.85 175.769   3
   1  -1 -19 5109.48 172.462   4
  -1  -1  19 5444.10 170.236   9
   1  -1 -19 5534.70 207.918   2
  -1   1  19 5475.10 206.685   2
  -1  -1  19 5197.16 204.452   2
   1   1 -19 5764.12 213.200   2
   1   1 -19 5400.17 258.285   5
   1  -1 -19 5179.02 262.633   5
  -1  -1  18 586.767 67.5566   1
   1  -1 -18 793.009 83.0531  11
   1   1 -18 671.620 69.3740  11
  -1   1  18 824.544 75.0045  10
   1  -1 -18 781.961 59.6593   4
  -1  -1  18 800.772 58.1903   9
  -1   1  18 612.576 67.2134   2
   1   1 -18 676.999 69.0965   2
  -1  -1  18 605.790 65.4492   2
   1  -1 -18 673.192 92.1118   5
   1   1 -18 743.832 95.2792   5
  -1  -1  17 15723.5 403.113   1
   1  -1 -17 15311.5 421.372  11
   1   1 -17 15737.1 397.405  11
  -1  -1  17 15757.1 357.108  10
   1  -1 -17 13919.5 352.451   4
  -1  -1  17 15512.4 352.585   9
  -1  -1  17 15209.3 394.981   2
  -1   1  17 14968.5 394.677   2
   1   1 -17 15534.9 397.409   2
   1   1 -17 15581.0 466.708   5
   1  -1 -17 14655.3 468.241   5
  -1  -1  16 49901.6 1011.86   1
   1   1 -16 48429.9 1006.65  11
  -1  -1  16 49291.7 962.505  10
   1   1 -16 48838.1 1086.24   5
   1  -1 -16 45934.8 957.678   4
  -1  -1  16 51286.1 959.891   9
  -1   1  16 47986.1 1003.93   2
  -1  -1  16 47700.2 1004.20   2
   1   1 -16 50063.7 1010.21   2
   1  -1 -16 48505.0 1101.90   5
  -1  -1  15 695.703 66.1562   1
   1   1 -15 629.241 63.1060  11
  -1  -1  15 854.477 58.0305  10
   1   1 -15 622.761 81.1535   5
   1  -1 -15 621.453 51.2127   4
  -1  -1  15 656.177 51.3869   9
  -1  -1  15 736.658 66.5440   2
   1   1 -15 633.802 61.5132   2
  -1   1  15 598.760 62.2125   2
   1  -1 -15 511.831 78.7104   5
  -1  -1  14 121761. 2244.83   1
   1   1 -14 115736. 2240.02  11
  -1   1  14 122010. 2256.32  10
  -1  -1  14 120864. 2198.78  10
   1  -1 -14 112346. 2192.63   4
   1   1 -14 120885. 2314.50   5
  -1  -1  14 119481. 2193.89   9
  -1  -1  14 116217. 2238.38   2
  -1   1  14 117797. 2237.75   2
   1   1 -14 117480. 2238.86   2
   1  -1 -14 115945. 2328.27   5
  -1  -1  13 822.938 63.8618   1
  -1   1  13 999.343 75.8328  10
   1   1 -13 884.678 66.4539  11
  -1  -1  13 876.347 54.7461  10
   1  -1 -13 947.240 54.3310   4
   1   1 -13 835.404 81.4136   5
  -1  -1  13 863.899 53.0670   9
  -1   1  13 985.903 68.2187   2
  -1  -1  13 857.311 65.5307   2
   1  -1 -13 808.435 85.9242   5
  -1  -1  12 41487.2 842.874   1
   1   1 -12 40534.6 841.315  11
  -1   1  12 42281.6 860.057  10
  -1  -1  12 43174.7 808.543  10
   1   1 -12 40976.6 890.751   5
   1  -1 -12 39989.4 800.992   4
  -1  -1  12 43091.9 806.194   9
  -1  -1  12 40965.1 838.975   2
  -1   1  12 39018.9 834.793   2
   1  -1 -12 40919.1 911.457   5
  -1  -1  11 17374.4 397.099   1
  -1   1  11 16235.0 404.338   1
   1   1 -11 17516.2 399.107  11
  -1  -1  11 18319.1 370.490  10
   1   1 -11 16918.0 434.569   5
   1  -1 -11 17200.2 363.687   4
  -1  -1  11 18200.4 368.803   9
  -1   1  11 17616.6 397.455   2
  -1  -1  11 16159.1 391.164   2
   1  -1 -11 17472.6 453.845   5
  -1  -1  10 14242.3 333.511   1
  -1   1  10 13977.6 343.599   1
   1   1 -10 14677.6 334.714  11
  -1  -1  10 14857.7 307.765  10
   1  -1 -10 14323.4 301.626   4
   1   1 -10 14564.0 370.821   5
  -1  -1  10 14888.3 307.399   9
  -1   1  10 13918.3 330.252   2
   1  -1 -10 14700.0 386.768   5
  -1   1   9 32824.9 667.022   1
  -1  -1   9 32991.5 654.163   1
   1   1  -9 31661.9 639.338  10
   1   1  -9 33935.8 656.031  11
  -1  -1   9 34140.5 625.993  10
   1  -1  -9 32458.6 619.476   4
   1   1  -9 32878.4 688.081   5
  -1  -1   9 32709.6 625.011   9
  -1   1   9 33559.5 655.253   2
   1   1  -9 33271.6 656.336   2
   1  -1  -9 32682.1 707.574   5
  -1   1   8 73555.7 1419.10   1
   1   1  -8 75662.0 1404.12  11
  -1  -1   8 76789.0 1377.59  10
   1   1  -8 71563.6 1388.08  10
   1   1  -8 74799.8 1433.84   5
   1  -1  -8 75162.0 1370.86   4
  -1  -1   8 75850.9 1378.44   9
   1  -1  -8 75309.6 1460.37   5
   1   1  -8 75315.0 1405.90   2
  -1   1   8 76355.1 1406.06   2
   1   1  -7 39576.1 795.633   2
  -1   1   7 39965.5 795.693   2
  -1   1   7 39833.0 807.575   1
   1   1  -7 40942.5 794.638  11
   1   1  -7 41177.8 781.326  10
  -1  -1   7 41888.1 771.297  10
   1  -1  -7 42373.0 765.714   4
  -1  -1   7 40918.4 771.874   9
  -1   1   7 40397.3 821.806   6
   1  -1  -7 41907.0 846.477   5
  -1   1   6 177784. 3259.88   2
   1   1  -6 178182. 3258.90   2
  -1   1   6 180533. 3271.47   1
   1   1  -6 179672. 3253.82  11
   1   1  -6 178483. 3239.40  10
  -1  -1   6 180574. 3233.42  10
   1  -1  -6 178525. 3226.85   4
  -1  -1   6 174444. 3235.15   9
  -1   1   6 179382. 3284.49   6
   1  -1  -6 179796. 3303.59   5
   1   1  -5 9482.81 209.826   2
   1   1  -5 9380.90 203.849  11
   1   1  -5 9403.13 192.378  10
  -1  -1   5 9608.40 189.758  10
   1   1  -5 9489.63 197.020   9
   1  -1  -5 9364.29 238.921   5
  -1   1   5 9305.23 228.715   6
  -1   1   5 9477.25 219.173   1
   1   1  -4 5965.22 133.013   2
  -1   1   4 5529.28 139.186   1
   1   1  -4 5401.66 124.363  11
   1   1  -4 5616.10 121.551   9
  -1   1   4 5447.97 147.759   6
   1  -1  -4 5339.95 153.473   5
   1   1  -3 2243.03 63.1050   2
  -1   1   3 2430.51 71.9108   1
   1   1  -3 2189.45 57.7866  11
   1   1  -3 2382.25 59.3184   9
   1  -1  -3 2344.56 82.6917   5
   1   1  -2 10315.8 203.558   2
  -1   1   2 10711.7 214.308   1
   1   1  -2 10531.0 203.972   9
   1   1  -2 10108.6 199.027  11
  -1  -1   2 10275.7 209.237   3
  -1   1   2 10454.9 223.597   6
   1  -1  -2 10410.1 228.044   5
  -1  -1   1 93526.4 1735.61   3
   1  -1  -1 96581.6 1749.22   5
   1  -1  -1 96645.2 1729.73   7
  -1   1   1 94608.6 1734.67   1
  -1  -1   0 62314.4 1180.70   3
   1  -1   0 62589.5 1189.40  11
  -1   1   0 65600.7 1178.21   1
  -1   1   0 65425.3 1188.59   8
  -1  -1   0 64857.9 1184.81   7
   1  -1   0 66739.7 1188.83   5
   1   1   1 1996.22 53.0449   3
   1  -1   1 1991.03 55.3066   3
   1  -1   1 1948.30 57.4246  11
  -1  -1  -1 2038.48 59.8239   4
  -1   1  -1 2005.64 57.4134   8
  -1  -1  -1 2085.60 58.3114   7
   1   1   1 2021.71 56.5280   6
   1   1   1 2017.32 60.5277   5
   1  -1   2 57933.6 1065.55   3
   1   1   2 58415.4 1055.84   2
  -1   1  -2 58240.2 1071.70  10
   1  -1   2 55097.8 1067.88  11
  -1  -1  -2 58874.9 1071.84   4
  -1  -1  -2 58744.2 1072.47   7
   1   1   2 58371.6 1084.08   5
   1   1   3 602.300 38.5969   5
  -1  -1  -3 326.094 22.9242   4
   1  -1   3 643.951 29.3840  11
   1  -1   3 379.700 21.1625   3
   1   1   3 359.424 20.3044   2
  -1   1  -3 393.249 26.0933  10
  -1   1  -4 4897.55 119.275  10
   1  -1   4 4071.96 110.432  11
   1  -1   4 4698.03 106.450   3
  -1  -1  -4 4635.13 114.134   4
   1   1   4 4646.94 110.516   2
  -1  -1  -4 4326.09 136.169   5
  -1   1  -5 1411.86 57.0444  10
  -1   1  -5 1291.22 51.6640  11
  -1  -1  -5 1382.62 52.4371   4
   1  -1   5 1295.10 43.4791   3
   1   1   5 1282.68 49.6733   2
   1  -1   5 1411.59 55.0556   2
  -1  -1  -5 1293.71 69.0790   5
  -1   1  -6 45382.9 881.431  10
  -1   1  -6 45667.3 875.144  11
  -1   1  -6 45615.3 857.994   3
  -1  -1  -6 46951.6 872.643   4
   1  -1   6 45644.0 879.075   2
   1   1   6 45578.5 871.649   2
  -1  -1  -6 47293.4 923.989   5
  -1  -1  -7 248.497 25.5122   4
  -1  -1  -7 218.945 35.7137   5
  -1   1  -7 217.850 19.3309   3
  -1   1  -7 234.154 25.4715  11
   1   1   7 208.108 24.1651   2
   1  -1   7 186.251 23.5353   2
   1  -1   7 213.863 25.4516  10
   1  -1   8 120085. 2181.74  10
  -1   1  -8 115967. 2195.48  10
  -1   1  -8 116187. 2186.54  11
  -1   1  -8 118533. 2161.69   3
  -1  -1  -8 118098. 2181.25   4
   1   1   8 118761. 2185.61   2
   1  -1   8 117096. 2191.76   2
  -1  -1  -8 118897. 2251.46   5
   1   1   9 8813.35 231.778   1
   1  -1   9 9001.63 215.833  10
  -1   1  -9 8421.01 226.722  10
  -1   1  -9 8648.43 222.461  11
  -1  -1  -9 8594.47 213.911   4
  -1   1  -9 8857.40 197.488   3
   1  -1   9 8759.84 222.385   2
   1   1   9 8159.72 216.430   2
  -1  -1  -9 8760.29 268.181   5
   1   1  10 70959.2 1377.03   1
   1   1  10 74437.2 1396.69  10
  -1   1 -10 70472.7 1376.70  10
   1  -1  10 72639.2 1352.97  10
  -1   1 -10 69499.5 1361.12  11
  -1   1 -10 71555.9 1328.17   3
  -1  -1 -10 69674.7 1351.43   4
   1   1  10 70820.7 1359.75   2
   1  -1  10 71200.9 1365.49   2
  -1  -1 -10 71442.8 1437.75   5
   1   1  11 6518.07 202.629   1
   1  -1  11 6840.33 185.105  10
   1   1  11 6604.97 210.820  10
  -1   1 -11 6410.62 202.489  10
  -1   1 -11 6602.23 193.153  11
  -1   1 -11 6905.70 166.454   3
  -1  -1 -11 6724.32 186.498   4
   1  -1  11 6518.54 193.742   2
   1   1  11 6348.88 189.357   2
  -1  -1 -11 6689.70 242.765   5
   1   1  12 3823.58 148.808   1
   1  -1  12 4076.83 132.716  10
   1   1  12 4034.65 157.215  10
  -1   1 -12 3835.04 150.261  10
  -1   1 -12 3862.83 139.410  11
  -1   1 -12 4094.98 176.935   5
  -1   1 -12 3897.52 115.287   3
  -1  -1 -12 3785.92 133.377   4
   1  -1  12 3853.38 141.259   2
   1   1  12 3668.87 136.497   2
  -1  -1 -12 3886.41 183.280   5
   1   1  13 21130.8 504.141   1
   1  -1  13 22348.7 476.374  10
  -1   1 -13 21400.8 489.358  11
  -1   1 -13 21156.4 505.448  10
  -1   1 -13 22234.9 450.811   3
  -1   1 -13 21962.4 554.079   5
  -1  -1 -13 21654.0 479.043   4
   1  -1  13 22434.5 496.162   2
   1   1  13 21089.7 485.989   2
  -1  -1 -13 21106.4 563.618   5
   1   1  14 7890.82 257.457   1
   1  -1  14 9005.10 237.816  10
  -1   1 -14 8580.27 302.955   5
  -1  -1 -14 8526.14 240.279   4
  -1   1 -14 9123.26 217.690   3
  -1   1 -14 9088.41 271.119  10
  -1  -1 -14 8782.64 270.089  11
  -1   1 -14 8851.80 251.172  11
  -1  -1 -14 9145.29 252.507   2
   1   1  14 8626.97 250.163   2
   1  -1  14 8970.55 257.545   2
  -1  -1 -14 8750.71 313.998   5
   1  -1  15 603.435 62.3408   1
  -1  -1 -15 704.541 69.9657  11
  -1   1 -15 628.595 60.6378  11
  -1   1 -15 588.118 44.6853   3
  -1  -1 -15 576.260 55.0443   4
  -1   1 -15 523.870 73.8241   5
   1  -1  15 455.129 54.5610   2
  -1  -1 -15 589.379 59.8458   2
   1   1  15 483.369 53.5662   2
  -1  -1 -15 661.007 85.9870   5
   1  -1  16 45145.1 913.059   1
   1   1  16 43798.3 913.646  10
  -1  -1 -16 43827.2 924.021  11
  -1   1 -16 42636.3 895.384  11
  -1   1 -16 41906.6 981.079   5
  -1   1 -16 43178.7 844.488   3
  -1  -1 -16 40643.7 876.060   4
   1  -1  16 42166.7 900.530   2
   1   1  16 42204.1 896.599   2
  -1  -1 -16 44596.4 900.038   2
  -1  -1 -16 41436.0 997.263   5
   1   1  17 299.226 57.1848  10
  -1  -1 -17 311.611 56.7249  11
  -1   1 -17 350.617 58.7632  11
  -1  -1 -17 352.741 54.7809   4
  -1   1 -17 296.087 40.2920   3
  -1   1 -17 272.822 73.8745   5
  -1  -1 -17 344.528 74.8322   5
  -1  -1 -17 381.674 56.6900   2
   1  -1  17 361.219 55.0721   2
   1   1  17 364.594 56.8565   2
   1  -1  17 402.566 60.1704   1
   1  -1  18 44314.6 934.351   1
  -1  -1 -18 45507.3 946.953  11
  -1   1 -18 42389.3 914.830  11
   1  -1  18 43979.7 887.181  10
   1   1  18 43865.6 926.380  10
  -1   1 -18 43913.0 1023.26   5
  -1  -1 -18 40740.5 892.640   4
  -1  -1 -18 44604.9 918.411   2
   1  -1  18 42850.9 922.813   2
   1   1  18 42263.9 915.037   2
  -1  -1 -18 41265.1 1023.28   5
   1  -1  19 6952.81 249.121   1
  -1  -1 -19 7385.49 259.592  11
  -1   1 -19 6910.15 238.279  11
   1  -1  19 7005.04 217.076  10
   1   1  19 7285.76 244.896  10
  -1  -1 -19 6008.76 216.386   4
  -1   1 -19 6912.68 305.667   5
   1  -1  19 7197.83 201.839   9
  -1  -1 -19 7284.53 242.298   2
   1  -1  19 6960.76 242.747   2
   1   1  19 6939.10 238.861   2
  -1  -1 -19 6839.46 308.601   5
   1  -1  20 697.513 76.7201   1
  -1  -1 -20 681.880 82.7362  11
  -1   1 -20 716.864 76.7143  11
   1   1  20 715.244 79.5369  10
   1  -1  20 774.690 70.1403  10
  -1  -1 -20 652.998 67.7273   4
  -1   1 -20 595.224 99.9803   5
   1  -1  20 748.080 58.3188   9
   1  -1  20 716.819 78.3058   2
   1   1  20 673.726 74.9991   2
  -1  -1 -20 823.276 80.9409   2
   1  -1  21 20494.6 532.861   1
  -1  -1 -21 20739.7 535.580  11
  -1   1 -21 20713.8 514.210  11
   1   1  21 20599.5 511.639  10
   1  -1  21 20693.1 480.249  10
  -1  -1 -21 18642.5 482.223   4
  -1   1 -21 21553.8 456.306   3
   1  -1  21 20275.0 452.246   9
   1   1  21 18896.2 505.229   2
  -1  -1 -21 20397.9 513.140   2
   1  -1  21 19774.0 516.006   2
  -1  -1 -21 19233.2 614.178   5
  -1   1 -21 19357.6 608.084   5
   1  -1  22 11216.1 355.752   1
  -1   1 -22 10986.6 339.281  11
  -1  -1 -22 11723.6 361.690  11
   1  -1  22 11147.3 308.398  10
   1   1  22 11452.3 337.566  10
  -1   1 -22 11738.9 290.193   3
  -1  -1 -22 10239.2 314.276   4
   1  -1  22 11204.8 287.056   9
   1  -1  22 10965.3 345.108   2
   1   1  22 10800.5 339.574   2
  -1  -1 -22 11882.3 349.182   2
  -1  -1 -22 10818.1 431.329   5
  -1   1 -22 10705.5 424.009   5
   1   1  23 39.2902 55.9197   1
  -1  -1 -23 66.6317 55.5289   2
   1  -1  23-21.0471 50.5168   1
   1  -1  23 29.3158 46.5484   2
  -1   1 -23 144.350 59.7181  11
  -1  -1 -23 31.0731 51.2274  11
   1  -1  23 102.751 50.3927  10
   1   1  23 93.6745 54.3728  10
  -1  -1 -23 62.2496 47.0215   4
  -1   1 -23 169.049 89.8893   5
   1  -1  23-7.56696 35.5475   9
   1   1  23 70.9429 51.0000   2
  -1   1 -23 133.163 39.7660   3
  -1  -1 -23 9.12847 76.8558   5
   1   1  24 32528.1 779.625   1
   1  -1  24 31982.7 766.887   1
  -1  -1 -24 33310.3 770.268  11
  -1   1 -24 33123.7 750.308  11
   1  -1  24 32486.2 700.607  10
   1   1  24 32793.2 733.332  10
  -1   1 -24 32240.0 671.925   3
  -1  -1 -24 28375.4 702.746   4
   1  -1  24 32232.8 670.917   9
   1   1  24 29730.6 739.687   2
   1  -1  24 31347.6 752.456   2
  -1   1 -24 31739.0 873.570   5
  -1  -1 -24 30453.1 871.691   5
   1   1  25 1024.80 113.360   1
   1  -1  25 722.324 97.1957   1
  -1  -1 -25 733.154 98.0832  11
  -1   1 -25 999.839 101.416  11
   1  -1  25 923.752 86.9523  10
   1   1  25 827.538 95.2740  10
  -1   1 -25 901.088 72.1979   3
  -1   1 -25 785.286 133.479   5
  -1  -1 -25 723.683 87.3833   4
  -1  -1 -25 880.044 65.7253   3
   1  -1  25 827.650 71.4716   9
  -1  -1 -25 807.415 133.022   5
   1  -1  25 793.320 95.4508   2
   1   1  25 836.064 95.9996   2
   1  -1  26 15167.2 449.184   1
   1   1  26 14614.4 451.861   1
  -1  -1 -26 14200.4 537.457   5
  -1   1 -26 14396.7 535.160   5
   1   1  26 15108.3 409.278  10
   1  -1  26 14845.4 382.895  10
  -1   1 -26 14686.2 356.704   3
  -1  -1 -26 14480.8 342.334   3
   1  -1  26 14578.0 353.605   9
   1   1  26 14645.7 484.794   6
   1  -1  26 14026.4 429.540   2
   1   1  26 13322.6 419.331   2
   1   1  27 70.9774 58.8152  10
   1  -1  27 62.6706 47.2756  10
  -1  -1 -27 76.8036 51.8098   4
  -1   1 -27-27.3506 66.0980   4
   1  -1  27 2.68859 36.2202   9
  -1  -1 -27 60.2584 34.5612   3
  -1   1 -27 20.1257 36.2312   3
   1  -1  27 42.6443 53.3021   1
   1  -1  28 314.301 50.2473   9
   1   1  28 200.873 61.1845   9
  -1   1 -28 265.336 79.1300   4
  -1  -1 -28 361.265 47.5581   3
  -1   1 -28 304.338 48.4330   3
   1  -1  28 252.916 57.9658  10
   1   1  28 264.022 65.6767  10
   1  -1  29 3149.23 130.730   9
   1   1  29 3067.06 152.221   9
   1   1  29 3193.74 166.662  10
   1  -1  29 3225.46 155.325  10
   1   1  30 3787.06 169.090   9
   1   1  30 3686.45 183.492  10
   1   1  31 2311.54 134.475   9
   1   3 -29 252.448 64.7776   3
  -1  -3  28 411.222 48.8190   9
  -1   3  28 423.635 90.1558  10
   1   3 -28 276.087 62.6398   3
  -1  -3  28 391.508 79.6085   1
   1   3 -27 8035.85 375.159   5
  -1  -3  27 8283.60 229.242  10
  -1   3  27 8115.41 306.093  10
  -1  -3  27 7650.74 210.272   9
   1   3 -27 8406.03 268.400   3
  -1  -3  27 8314.00 299.533   1
   1   3 -26 66.5801 54.5531  11
  -1   3  26 57.6276 56.5913  10
  -1  -3  26 69.9983 38.9419  10
   1   3 -26 110.651 80.6823   5
  -1  -3  26 82.6267 31.0995   9
   1   3 -26 55.2687 44.3590   3
  -1  -3  26 67.2593 51.9188   1
  -1  -3  25 929.442 98.7563   1
  -1   3  25 908.923 106.268   1
   1   3 -25 1123.63 107.979  11
  -1  -3  25 983.533 69.5166  10
  -1   3  25 1017.14 113.276  10
  -1  -3  25 977.528 61.8262   9
   1  -3 -25 1096.91 107.013   2
   1   3 -25 1155.67 90.5522   3
   1   3 -25 1090.97 142.848   5
   1  -3 -25 1004.81 143.791   5
  -1   3  24 20308.2 557.133   1
  -1  -3  24 20417.5 527.712   1
   1   3 -24 20597.9 527.102  11
   1  -3 -24 20866.5 584.584  11
  -1   3  24 21466.2 564.318  10
  -1  -3  24 20862.9 455.524  10
   1  -3 -24 18368.2 426.081   4
  -1  -3  24 19914.3 433.735   9
   1  -3 -24 21409.9 540.336   2
   1   3 -24 21616.7 502.472   3
   1  -3 -24 19768.7 647.183   5
   1   3 -24 20793.5 632.030   5
  -1   3  23 1714.74 132.113   1
  -1  -3  23 1888.34 124.949   1
   1  -3 -23 2108.63 156.588  11
   1   3 -23 1846.01 125.344  11
  -1   3  23 1758.44 140.887  10
   1  -3 -23 1645.69 78.9807   4
  -1  -3  23 1628.73 78.4537   9
   1   3 -23 1930.17 115.181   3
   1  -3 -23 1781.74 127.685   2
   1  -3 -23 1620.16 166.109   5
   1   3 -23 1739.29 161.049   5
  -1  -3  22 14671.0 405.448   1
  -1   3  22 14766.6 437.179   1
   1   3 -22 15130.5 407.413  11
  -1   3  22 14503.6 440.896  10
   1  -3 -22 13313.4 322.531   4
   1   3 -22 14393.9 485.917   5
   1   3 -22 15537.2 386.921   3
  -1  -3  22 14193.1 323.976   9
   1  -3 -22 15402.0 418.472   2
   1  -3 -22 14186.9 509.218   5
  -1  -3  21 354.773 59.8871   1
  -1   3  21 388.907 70.4530   1
   1  -3 -21 312.573 60.9260   2
  -1  -3  21 218.491 57.3644   2
   1   3 -21 410.753 63.8146  11
  -1   3  21 355.776 76.5640  10
   1  -3 -21 301.908 39.1277   4
   1   3 -21 322.874 82.6052   5
  -1  -3  21 301.472 37.0117   9
   1   3 -21 250.364 45.4396   3
   1  -3 -21 306.992 82.0403   5
  -1   3  20 1809.24 128.303   1
  -1  -3  20 1998.05 119.799   1
   1   3 -20 2175.88 123.870  11
  -1   3  20 2015.52 141.248  10
   1   3 -20 2010.96 110.335   3
   1   3 -20 1885.05 152.018   5
   1  -3 -20 1910.07 82.9489   4
  -1  -3  20 2077.49 82.8081   9
   1  -3 -20 2158.32 126.214   2
  -1  -3  20 2009.91 127.723   2
   1  -3 -20 2136.93 171.754   5
  -1   3  19 6633.12 252.039   1
  -1  -3  19 6824.81 231.810   1
   1   3 -19 6378.38 224.769  11
  -1   3  19 6985.30 271.646  10
  -1  -3  19 6710.49 188.188  10
   1   3 -19 7018.44 218.304   3
   1   3 -19 6369.47 278.215   5
   1  -3 -19 6190.32 174.879   4
  -1  -3  19 6556.05 172.524   9
   1  -3 -19 6643.96 305.592   5
  -1  -3  19 6305.25 232.179   2
   1  -3 -19 7023.17 237.961   2
  -1  -3  18 11070.7 329.083   2
   1  -3 -18 11888.5 334.644   2
  -1  -3  18 11329.8 322.023   1
  -1   3  18 11111.1 346.734   1
  -1   3  18 11614.5 371.690  10
   1   3 -18 11594.9 323.559  11
  -1  -3  18 12184.4 281.711  10
   1   3 -18 11711.4 387.857   5
   1  -3 -18 11474.4 269.493   4
   1   3 -18 12406.9 317.438   3
  -1  -3  18 11493.6 262.581   9
   1  -3 -18 11624.3 415.953   5
   1  -3 -17 19746.4 476.373   2
  -1  -3  17 18895.8 474.087   2
  -1   3  17 18730.5 494.636   1
  -1  -3  17 19843.6 467.715   1
   1   3 -17 19150.0 463.559  11
   1   3 -17 19147.6 452.354  10
  -1  -3  17 19393.1 417.956  10
  -1   3  17 19133.7 552.011   5
   1  -3 -17 18529.9 407.377   4
   1   3 -17 19832.9 455.487   3
   1   3 -17 19491.8 533.970   5
  -1  -3  17 19350.7 400.875   9
  -1   3  17 18834.9 526.173   6
   1  -3 -17 19336.1 572.097   5
   1  -3 -16 41311.6 852.948   2
  -1  -3  16 39149.3 849.718   2
  -1  -3  16 40704.6 840.148   1
  -1   3  16 40027.3 874.785   1
   1   3 -16 40793.3 841.694  11
  -1  -3  16 40998.1 792.342  10
   1   3 -16 36965.9 821.172  10
   1   3 -16 43017.4 836.842   3
  -1   3  16 39978.8 940.849   5
   1  -3 -16 39282.7 781.886   4
   1   3 -16 39848.9 909.315   5
  -1  -3  16 39421.5 773.813   9
  -1   3  16 40270.9 911.656   6
   1  -3 -16 39392.3 956.538   5
   1  -3 -15 1172.59 84.7500   2
  -1  -3  15 1174.69 82.8930   2
  -1   3  15 1233.11 93.6246   1
  -1  -3  15 1154.36 78.7259   1
   1   3 -15 1171.77 79.3992  11
  -1  -3  15 1186.51 63.2062  10
   1   3 -15 1206.23 77.0387  10
   1  -3 -15 1103.47 58.1006   4
  -1   3  15 1166.67 113.903   5
   1   3 -15 1410.66 83.8141   3
  -1  -3  15 1112.28 54.5007   9
  -1   3  15 1182.58 104.862   6
   1  -3 -15 1234.77 120.225   5
   1  -3 -14 31113.8 666.103   2
  -1  -3  14 30822.5 666.790   2
   1   3 -14 31509.2 657.085  11
  -1  -3  14 30160.4 614.453  10
  -1  -3  14 30570.0 600.640   9
   1   3 -14 29084.3 635.657  10
  -1   3  14 30440.9 687.262   1
  -1  -3  14 31634.2 655.620   1
  -1   3  14 30816.3 756.445   5
   1   3 -14 32041.4 655.542   3
  -1   3  14 30430.3 720.910   6
   1  -3 -14 29452.1 754.747   5
   1  -3 -13 4951.77 169.834   2
  -1  -3  13 4859.61 169.222   2
   1   3 -13 4716.28 160.727  11
  -1  -3  13 4823.46 137.899  10
   1   3 -13 4516.03 147.672  10
  -1  -3  13 4873.26 128.547   9
  -1  -3  13 5051.01 161.776   1
  -1   3  13 4621.81 179.310   1
  -1   3  13 4851.82 220.405   5
  -1   3  13 4885.94 202.007   6
   1  -3 -13 4610.94 217.329   5
  -1  -3  12 15622.1 372.920   2
  -1  -3  12 15511.2 322.853   9
   1   3 -12 15212.4 344.770  10
   1   3 -12 15160.6 362.366  11
  -1  -3  12 15612.6 375.312  11
  -1   3  12 14823.5 388.752   1
  -1  -3  12 15593.6 358.702   1
  -1   3  12 15916.8 421.174   6
   1  -3 -12 15505.4 446.366   5
  -1  -3  11 4367.09 147.958   2
  -1   3  11 4059.81 157.374   1
  -1  -3  11 4039.79 134.350   1
  -1  -3  11 4174.71 144.461  11
   1   3 -11 4189.02 140.408  11
   1   3 -11 3882.33 125.158  10
  -1  -3  11 4282.77 113.132   9
  -1   3  11 4058.44 173.280   6
   1  -3 -11 4018.18 187.899   5
   1  -3 -10 1540.00 79.3524   2
  -1  -3  10 1589.13 80.2444   2
  -1   3  10 1869.89 95.8754   1
  -1  -3  10 1541.94 70.3183   1
  -1  -3  10 1429.56 75.8651  11
   1   3 -10 1566.61 76.9007  11
   1   3 -10 1450.94 66.0523  10
  -1   3  10 1650.11 64.7463   4
   1   3 -10 1512.61 59.8944   9
  -1   3  10 1607.86 100.430   6
   1  -3 -10 1601.88 110.222   5
   1  -3  -9 1738.09 83.1101   2
  -1  -3   9 1771.89 82.8057   2
   1   3  -9 1783.14 84.7905   3
  -1   3   9 1797.81 92.8600   1
  -1  -3   9 1818.35 72.9786   1
   1   3  -9 1824.93 80.4252  11
  -1  -3   9 1785.23 79.5148  11
   1   3  -9 1909.14 72.9815  10
  -1   3   9 1919.03 70.0701   4
   1   3  -9 1906.13 64.5900   9
  -1   3   9 1941.72 107.167   6
   1  -3  -9 1830.51 115.834   5
   1  -3  -8 133319. 2370.47   2
  -1  -3   8 130594. 2367.91   2
  -1  -3   8 133414. 2343.67   1
  -1   3   8 131742. 2391.98   1
  -1  -3   8 128090. 2355.19  11
   1   3  -8 123298. 2361.43  11
   1   3  -8 120814. 2347.11  10
  -1   3   8 135253. 2344.27   4
   1   3  -8 128713. 2328.64   9
  -1   3   8 132983. 2425.36   6
  -1  -3   7 6495.28 176.636   2
   1  -3  -7 6641.80 178.470   2
  -1   3   7 6433.61 189.369   1
   1   3  -7 6587.10 175.526  11
  -1  -3   7 6603.64 168.054  11
   1   3  -7 6556.61 165.838  10
  -1  -3   7 6557.87 178.128   3
  -1   3   7 6730.57 166.522   4
   1   3  -7 6871.70 153.075   9
  -1   3   7 6630.05 209.301   6
   1  -3  -7 6670.01 190.846   7
  -1   3   7 7022.52 233.693   5
  -1  -3   6 127326. 2337.93   2
  -1   3   6 123592. 2359.75   1
  -1  -3   6 129293. 2328.91  11
   1   3  -6 126643. 2342.56  11
   1   3  -6 127065. 2329.67  10
   1   3  -6 125098. 2312.32   9
  -1   3   6 128333. 2332.88   4
  -1  -3   6 129686. 2350.27   3
  -1  -3   6 131300. 2338.94   8
   1  -3  -6 124903. 2357.22   7
  -1   3   6 132137. 2392.72   6
  -1   3   6 129366. 2421.63   5
  -1  -3   5 27635.0 553.397   2
   1  -3  -5 26783.6 575.220   1
  -1   3   5 27865.7 571.732   1
   1   3  -5 26881.3 560.282  11
  -1  -3   5 28498.1 548.235  11
   1   3  -5 28251.1 538.862   9
  -1  -3   5 28475.9 571.652   3
  -1  -3   5 28780.0 558.036   8
  -1   3   5 28687.1 603.111   6
   1  -3  -5 27776.5 571.993   7
  -1   3   5 28636.1 624.466   5
  -1  -3   4 99387.6 1816.60   2
   1   3  -4 94313.3 1828.27  11
  -1  -3   4 99749.2 1814.88  11
  -1  -3   4 95998.1 1839.32   3
  -1  -3   4 98995.3 1823.33   8
  -1   3   4 101609. 1892.17   5
  -1   3   4 98825.0 1863.39   6
   1  -3  -4 98460.8 1837.17   7
   1  -3  -4 99912.3 1839.03   1
  -1   3   4 99130.0 1834.02   1
  -1  -3   3 239.096 27.6857   3
  -1   3   3 240.829 24.2827   1
   1  -3  -3 198.546 24.1537   1
   1   3  -3 220.236 25.2024  11
  -1  -3   3 223.018 22.3306  11
  -1  -3   3 279.755 25.6645   8
   1   3  -3 188.667 20.4580   8
   1  -3  -3 224.745 25.8830   7
  -1   3   3 207.581 29.8970   6
  -1   3   3 178.241 33.1606   5
   1   3  -3 269.175 26.3932   5
  -1  -3   2 23685.2 480.992   3
   1  -3  -2 23675.1 467.782   1
  -1   3   2 22955.2 461.672   1
  -1  -3   2 23121.9 463.466  11
   1   3  -2 23038.6 461.133   8
  -1  -3   2 24066.9 467.910   8
   1  -3  -2 23340.6 472.334   7
  -1   3   2 23080.7 509.417   5
   1   3  -2 22049.0 469.319   5
  -1  -3   1 7212.32 184.139   3
   1  -3  -1 7017.27 184.211   3
  -1   3   1 7075.77 164.017   1
   1  -3  -1 7330.32 169.373   1
   1   3  -1 7279.00 142.159   1
  -1  -3   1 7026.08 174.122  11
  -1   3   1 7039.84 186.498   8
   1   3  -1 7133.65 172.272   8
  -1  -3   1 6862.64 181.340   7
   1  -3  -1 7046.93 175.590   7
   1   3  -1 7260.12 182.230   5
  -1   3   1 7235.76 202.795   5
  -1  -3   1 7445.98 175.308   5
   1   3   0 187752. 3487.04   1
  -1  -3   0 198243. 3489.48   1
   1  -3   0 198432. 3504.79   1
  -1   3   0 193108. 3499.16   1
  -1   3   0 190118. 3546.18   5
  -1  -3   0 193800. 3524.30   5
   1   3   0 190841. 3534.92   5
  -1   3   0 197841. 3532.82   8
   1   3   0 192403. 3518.35   8
  -1  -3   0 194933. 3526.19   6
  -1  -3   0 188608. 3528.81   7
   1  -3   0 188719. 3519.28   7
   1  -3   0 191060. 3529.39   3
   1   3   0 191943. 3529.21   3
   1  -3   1 1851.75 58.3910   1
   1   3   1 1710.28 55.7995   1
  -1   3  -1 1821.20 80.8307   5
  -1  -3  -1 1733.25 75.3751   5
   1   3   1 2015.39 84.7591   5
  -1   3  -1 1750.09 73.1952   8
  -1   3  -1 1653.82 65.8478   7
  -1  -3  -1 1814.20 74.3982   6
  -1  -3  -1 1850.42 75.0442   7
   1  -3   1 1832.20 75.3684   3
   1   3   1 1788.63 72.6625   3
   1  -3   2 168264. 3007.75   3
   1   3   2 165371. 2979.35   1
   1  -3   2 168082. 2969.79   1
  -1   3  -2 156876. 3010.49  11
  -1   3  -2 168366. 3001.27   8
  -1   3  -2 156489. 2991.41   7
  -1  -3  -2 157677. 3007.28   6
   1   3   2 167582. 3011.51   6
  -1  -3  -2 169323. 3007.48   7
  -1  -3  -2 158729. 3014.38   5
  -1   3  -2 157335. 3008.06   5
   1   3   2 161674. 3027.64   5
  -1   3  -3 4328.32 137.250  11
   1   3   3 4445.16 122.378   1
  -1   3  -3 4525.32 129.070   8
   1   3   3 4324.57 140.773   6
  -1  -3  -3 4305.46 133.871   7
   1   3   3 4336.84 149.937   5
  -1  -3  -4 5539.52 131.511   2
   1  -3   4 5833.73 157.873   3
  -1  -3  -4 5076.44 144.868   3
   1   3   4 5292.93 147.324   1
  -1   3  -4 5634.74 161.548  11
   1   3   4 5529.82 157.234   4
   1  -3   4 5234.31 152.962   8
  -1  -3  -4 5590.17 159.276   7
   1   3   4 5851.07 171.654   6
   1   3   4 5477.65 181.720   5
   1  -3   5 27462.9 560.548   3
  -1  -3  -5 27019.5 549.694   3
  -1  -3  -5 27884.9 535.144   2
   1   3   5 26854.7 559.575   1
  -1   3  -5 26893.9 564.292  11
  -1   3  -5 26483.6 556.703  10
   1   3   5 27998.9 561.853   4
   1  -3   5 27850.0 562.637   8
   1   3   5 27833.9 586.675   6
  -1  -3  -5 27389.8 568.725   7
   1   3   5 27246.5 603.637   5
  -1  -3  -6 36889.3 712.515   2
  -1   3  -6 34468.3 732.029   3
   1   3   6 36795.8 739.223   1
  -1   3  -6 36348.1 739.114  11
   1  -3   6 34903.9 724.186  11
  -1   3  -6 37151.5 734.159  10
   1   3   6 39395.3 737.459   4
   1  -3   6 36056.5 733.156   3
   1  -3   6 37425.7 738.579   8
  -1   3  -6 37616.4 679.308   9
  -1  -3  -6 37729.7 749.627   7
   1   3   6 37386.2 769.687   6
   1   3   6 35466.6 787.637   5
  -1  -3  -7 2287.66 81.4860   2
  -1   3  -7 2469.10 93.9003   3
   1   3   7 2160.88 94.2617   1
  -1   3  -7 2263.46 92.9066  11
   1  -3   7 2174.30 85.6434  11
  -1   3  -7 2158.22 89.0786  10
   1  -3   7 2280.62 88.6980   3
   1   3   7 2152.31 86.4555   4
  -1   3  -7 2138.73 52.7246   9
  -1  -3  -7 2256.65 98.3361   7
   1   3   7 2271.99 109.612   6
   1   3   7 2079.63 114.239   5
  -1   3  -8 112842. 2086.89   3
  -1  -3  -8 113612. 2072.89   2
  -1   3  -8 111725. 2092.13  11
   1  -3   8 111754. 2082.33  11
  -1   3  -8 105275. 2086.04  10
   1   3   8 109205. 2103.24   1
   1  -3   8 111860. 2079.83   3
   1   3   8 115955. 2083.17   4
   1   3   8 114088. 2138.10   6
  -1  -3  -8 110156. 2106.71   7
   1   3   8 111501. 2160.16   5
  -1   3  -9 8252.25 212.609   3
  -1  -3  -9 7915.54 203.347   2
  -1   3  -9 7924.88 216.138  11
   1  -3   9 7880.46 210.893  11
  -1   3  -9 7250.20 206.543  10
   1   3   9 7811.63 225.357   1
  -1  -3  -9 8063.38 208.751   4
   1   3   9 7816.96 205.743   4
   1  -3   9 7800.36 202.591   3
   1   3   9 7930.43 248.054   6
   1   3   9 7508.25 259.625   5
   1  -3  10 99615.7 1888.12  11
  -1   3 -10 98637.1 1891.58  11
   1  -3  10 104364. 1877.42  10
  -1   3 -10 99438.2 1884.48  10
   1   3  10 95684.8 1907.91   1
  -1  -3 -10 99815.4 1877.71   4
   1   3  10 101098. 1878.06   4
   1   3  10 100270. 1973.93   5
   1   3  10 97898.8 1945.06   6
  -1  -3 -10 98607.0 1878.13   2
  -1   3 -10 102151. 1882.63   3
  -1   3 -11 66.6975 25.3077  11
   1  -3  11 22.6786 23.2470  11
   1  -3  11 53.8046 24.7780  10
  -1   3 -11 18.7062 22.7958  10
   1   3  11 89.6908 31.4668   1
  -1  -3 -11 10.9294 18.2283   2
   1   3  11 37.4441 35.6868   5
   1   3  11 24.2768 22.6036   4
  -1  -3 -11 26.7420 19.2947   4
   1   3  11 40.0238 30.5182   6
  -1   3 -11 56.5283 23.5908   3
   1  -3  12 10590.3 223.534   9
   1  -3  12 11288.7 272.460  10
  -1   3 -12 11133.8 286.279  10
   1  -3  12 11621.7 299.112  11
  -1   3 -12 11313.0 292.202  11
   1   3  12 11151.0 348.301   5
  -1  -3 -12 10915.3 272.693   4
   1   3  12 10792.2 331.477   6
   1   3  12 11033.7 308.227   1
   1  -3  13 9482.90 239.655  10
  -1   3 -13 9159.39 256.233  10
   1  -3  13 8822.36 190.537   9
   1  -3  13 9335.83 265.432  11
  -1   3 -13 8920.55 256.089  11
   1   3  13 9351.18 316.296   5
  -1  -3 -13 9041.96 238.380   4
   1   3  13 8913.81 299.956   6
   1   3  13 9083.94 274.734   1
   1   3  14 14584.0 397.982   1
   1  -3  14 15543.9 393.043  11
  -1   3 -14 15802.5 382.478  11
   1  -3  14 15254.2 306.005   9
  -1   3 -14 14392.9 377.065  10
   1  -3  14 15850.9 359.555  10
   1   3  14 14983.4 444.487   5
  -1  -3 -14 14792.9 355.689   4
   1   3  14 14794.2 431.003   6
  -1  -3 -14 15794.8 376.210   2
   1   3  15 550.410 65.0167   1
  -1   3 -15 537.010 60.0661  11
   1   3  15 509.615 77.2542  10
   1  -3  15 624.460 68.3277  11
  -1   3 -15 468.338 57.9193  10
   1   3  15 461.673 75.8281   5
  -1  -3 -15 584.582 53.9380   4
   1  -3  15 466.001 29.7731   9
   1   3  15 496.865 75.0170   6
  -1  -3 -15 624.077 60.2390   2
  -1   3 -16 55281.2 1087.74   3
  -1  -3 -16 57190.9 1113.97   2
   1   3  16 54511.9 1148.15   1
  -1   3 -16 57211.5 1118.35  11
   1   3  16 57836.0 1189.67  10
  -1   3 -16 52821.7 1115.95  10
   1   3  16 56014.8 1210.46   5
  -1  -3 -16 53664.9 1079.98   4
   1  -3  16 54199.6 1022.44   9
   1   3  16 53069.9 1186.34   6
  -1  -3 -16 50836.9 1228.77   5
   1   3  17 49.4588 46.0664   1
  -1  -3 -17 20.4564 36.3279   2
   1  -3  17 38.3269 34.7299   1
  -1   3 -17 106.113 43.7817  11
   1   3  17 26.5614 57.2858  10
  -1   3 -17 38.1680 39.1108  10
  -1  -3 -17 75.3215 36.7403   4
   1  -3  17 131.413 22.5357   9
   1   3  17 17.0486 49.7345   6
  -1  -3 -17 110.043 74.1228   5
  -1   3 -17 51.3910 33.0219   3
  -1  -3 -18 23412.5 535.673   2
  -1   3 -18 23795.4 506.991   3
   1  -3  18 21655.2 530.159   1
   1   3  18 21511.9 557.093   1
  -1   3 -18 23139.5 537.390  11
   1   3  18 22327.2 584.385  10
  -1   3 -18 21059.1 534.159  10
  -1  -3 -18 20999.4 491.865   4
   1  -3  18 21918.1 441.510   9
   1   3  18 21827.1 597.670   6
  -1  -3 -18 22392.1 649.024   5
  -1   3 -19 2967.37 127.472   3
  -1  -3 -19 2913.78 143.076   2
   1  -3  19 3023.98 147.498   1
   1   3  19 2960.08 162.229   1
  -1   3 -19 2762.54 148.240  10
  -1   3 -19 2956.42 145.944  11
   1   3  19 3063.37 172.070  10
   1  -3  19 2945.55 125.369  10
  -1   3 -19 2718.11 181.177   5
  -1  -3 -19 2904.16 123.322   4
   1  -3  19 3007.30 92.0479   9
   1   3  19 2518.02 170.238   6
  -1  -3 -19 3106.50 206.822   5
  -1   3 -20 8885.57 249.033   3
  -1  -3 -20 8539.55 270.784   2
   1   3  20 8578.53 299.214   1
   1  -3  20 8589.72 278.509   1
  -1   3 -20 8116.25 279.651  10
  -1   3 -20 7941.27 269.418  11
   1   3  20 8687.75 311.610  10
   1  -3  20 8714.88 242.722  10
  -1   3 -20 8461.30 342.738   5
  -1  -3 -20 7895.60 236.162   4
   1  -3  20 7827.68 192.785   9
   1   3  20 8362.85 324.944   6
  -1  -3 -20 7816.10 350.578   5
  -1   3 -21 1130.10 80.8714   3
  -1  -3 -21 1258.29 97.6877   2
   1   3  21 1186.73 108.891   1
   1  -3  21 1121.55 96.7512   1
  -1  -3 -21 866.616 102.087  11
  -1   3 -21 1058.46 93.4081  11
   1  -3  21 1203.26 80.1719  10
   1   3  21 1192.99 111.757  10
  -1   3 -21 1016.23 123.651   5
  -1  -3 -21 1077.53 77.1808   4
   1  -3  21 1091.61 53.9442   9
   1   3  21 970.566 113.415   6
  -1  -3 -21 1048.49 131.916   5
  -1   3 -22 1149.67 84.2520   3
  -1  -3 -22 1249.12 101.612   2
   1   3  22 997.549 103.398   1
   1  -3  22 1103.16 99.3306   1
  -1  -3 -22 1097.01 111.660  11
  -1   3 -22 1067.36 97.3251  11
   1  -3  22 1169.69 81.2227  10
   1   3  22 1277.19 117.148  10
  -1  -3 -22 1138.93 79.7036   4
  -1   3 -22 1051.42 130.642   5
   1  -3  22 1215.67 57.9735   9
   1   3  22 1070.73 122.703   6
  -1  -3 -22 1148.67 142.310   5
   1  -3  23 82.6735 49.8569   1
   1   3  23 82.4431 50.1186   1
  -1  -3 -23 101.170 50.8223   2
  -1   3 -23 141.483 59.9916  11
  -1  -3 -23 122.371 62.7041  11
   1   3  23 144.392 67.4112  10
   1  -3  23 109.130 45.1330  10
  -1  -3 -23 137.305 42.2674   4
  -1   3 -23 181.858 76.4952   5
   1  -3  23 161.389 30.1654   9
   1   3  23 87.8335 70.8306   6
  -1  -3 -23 116.032 81.4329   5
  -1   3 -23 114.639 40.5876   3
  -1  -3 -24 7280.84 261.125   2
  -1   3 -24 6674.39 218.386   3
   1   3  24 6244.54 271.416   1
   1  -3  24 6528.56 255.328   1
  -1  -3 -24 6949.66 282.868  11
  -1   3 -24 6759.81 254.172  11
   1  -3  24 7030.98 218.747  10
   1   3  24 6835.14 275.998  10
  -1  -3 -24 5955.38 204.133   4
  -1   3 -24 6635.97 326.587   5
   1  -3  24 6378.03 168.679   9
   1   3  24 5575.20 284.562   6
  -1  -3 -24 6973.51 350.731   5
   1   3  25 1135.93 117.127   1
   1  -3  25 1343.27 114.541   1
  -1   3 -25 1264.00 112.203  11
   1   3  25 1350.03 124.685  10
   1  -3  25 1286.27 91.6308  10
  -1  -3 -25 1144.47 85.3650   4
  -1   3 -25 1154.69 151.819   5
   1  -3  25 1107.65 60.6799   9
  -1   3 -25 1304.90 89.8347   3
  -1  -3 -25 1345.92 114.315   2
  -1  -3 -25 1137.02 152.145   5
  -1   3 -26 3705.37 256.495   5
   1   3  26 3832.61 202.392  10
   1  -3  26 3745.89 154.431  10
   1  -3  26 3507.71 188.219   1
  -1   3 -26 3749.43 156.472   3
   1  -3  26 3392.88 111.755   9
   1   3  27 2807.34 175.390  10
   1  -3  27 3008.68 138.036  10
   1  -3  27 2628.58 94.9861   9
  -1   3 -27 2899.50 137.597   3
   1  -3  27 2552.29 163.329   1
  -1   3 -28 419.770 63.7224   3
  -1  -5  28 3004.90 166.427   1
   1   5 -27 1447.68 117.023   3
  -1  -5  27 1537.68 117.882   1
   1   5 -26 548.137 78.5196   3
  -1  -5  26 671.597 83.8262   1
   1   5 -26 495.349 109.324   5
   1  -5 -25 295.917 69.9483   2
  -1  -5  25 343.856 65.0397   1
   1   5 -25 338.538 94.9348   5
   1   5 -25 403.749 81.1680  11
   1   5 -25 408.153 71.4758   3
  -1   5  24 9020.66 361.108  10
  -1  -5  24 8443.00 280.897   1
   1   5 -24 8276.76 358.186   5
   1   5 -24 8860.96 310.759  11
   1  -5 -24 9237.93 309.909   2
  -1  -5  24 8361.31 306.510   2
   1   5 -24 9131.98 294.511   3
   1   5 -23 465.825 73.8624   3
   1   5 -23 357.884 74.8400  11
  -1   5  23 358.929 106.664  10
   1   5 -23 327.791 93.1515   5
  -1   5  23 426.862 99.2171   6
   1  -5 -23 342.463 113.136   5
   1  -5 -23 342.850 78.4683   7
  -1  -5  23 412.152 76.8925   2
  -1  -5  23 321.738 60.7346   1
   1  -5 -23 364.360 77.4948   2
  -1   5  23 328.936 76.6412   1
  -1  -5  22 24291.0 605.704   2
   1  -5 -22 24981.7 595.780   2
   1   5 -22 24710.6 587.842   3
  -1   5  22 23545.5 624.920   1
  -1  -5  22 23696.4 565.767   1
   1   5 -22 24721.7 604.444  11
  -1   5  22 26040.1 690.589  10
   1   5 -22 23327.2 665.711   5
  -1   5  22 24910.6 710.754   5
   1  -5 -22 21241.2 618.356   7
  -1   5  22 22616.1 662.895   6
   1  -5 -22 22564.9 713.418   5
   1   5 -21 2055.21 126.921   3
   1  -5 -21 1988.39 127.480   2
  -1  -5  21 1831.00 125.694   2
  -1   5  21 1951.05 164.347  10
   1   5 -21 2238.52 137.788  11
   1   5 -21 1936.85 110.752  10
  -1   5  21 1964.65 143.592   1
  -1  -5  21 1869.81 112.510   1
  -1   5  21 2190.64 183.105   5
   1   5 -21 1778.93 153.133   5
  -1   5  21 2176.38 165.850   6
   1  -5 -21 1824.76 141.754   7
   1  -5 -21 1736.57 173.715   5
   1   5 -20 6833.91 249.254  11
   1   5 -20 6537.32 215.436  10
  -1  -5  20 6212.31 217.153   1
  -1   5  20 6266.57 258.900   1
  -1   5  20 6777.77 316.399   5
   1   5 -20 6237.39 279.518   5
  -1   5  20 6813.64 294.444   6
   1  -5 -20 6156.09 260.131   7
  -1  -5  20 6166.30 241.138   2
   1   5 -20 7063.15 243.546   3
   1  -5 -20 7153.75 245.849   2
   1   5 -19 300.083 60.9511   3
   1   5 -19 360.879 66.1007  11
   1   5 -19 287.509 49.2063  10
  -1  -5  19 233.574 55.2237   2
   1  -5 -19 359.648 59.1469   2
  -1   5  19 305.951 64.6609   1
  -1  -5  19 287.514 48.8549   1
  -1   5  19 201.313 75.6632   5
   1  -5 -19 174.627 59.3235   7
  -1   5  19 386.775 79.5593   6
   1   5 -18 7599.57 256.584  11
   1   5 -18 6863.28 218.239  10
  -1  -5  18 7547.48 228.800   1
  -1   5  18 6820.81 266.217   1
  -1   5  18 7798.29 331.090   5
   1  -5 -18 6796.70 266.430   7
  -1   5  18 7269.44 297.465   6
  -1  -5  18 7221.88 251.971   2
   1   5 -18 7586.08 251.658   3
   1  -5 -18 7615.65 250.181   2
   1   5 -17 6310.47 226.034  11
   1   5 -17 5693.10 192.180  10
  -1   5  17 6096.26 240.080   1
  -1  -5  17 6404.55 201.144   1
  -1   5  17 6436.09 297.063   5
  -1   5  17 6365.09 271.819   6
   1  -5 -17 6081.93 243.026   7
   1  -5 -17 6432.01 221.647   2
   1   5 -17 6853.25 230.877   3
  -1  -5  17 6368.00 228.518   2
  -1  -5  16 21922.7 520.278  11
   1   5 -16 21757.3 520.836  11
   1   5 -16 20636.2 476.334  10
  -1  -5  16 21412.5 481.560   1
  -1   5  16 20983.9 538.960   1
  -1   5  16 21576.7 626.635   5
  -1   5  16 21009.8 580.768   6
   1  -5 -16 20366.1 541.436   7
  -1  -5  16 21073.5 516.479   2
   1   5 -16 22973.3 527.982   3
   1  -5 -16 21569.3 511.296   2
   1   5 -15 7406.26 237.469   3
  -1  -5  15 6841.24 227.939   2
   1  -5 -15 6654.83 221.270   2
  -1   5  15 6608.71 243.492   1
  -1  -5  15 6661.13 199.193   1
  -1  -5  15 6787.21 224.855  11
   1   5 -15 7013.16 231.703  11
   1   5 -15 6482.55 197.422  10
   1  -5 -15 6288.87 243.334   7
  -1   5  15 6552.32 269.867   6
  -1   5  15 7140.03 308.081   5
  -1  -5  14 25963.5 583.894   2
   1  -5 -14 25699.1 577.949   2
   1   5 -14 27319.7 599.027   3
  -1  -5  14 25579.9 545.295   1
  -1   5  14 24784.1 604.131   1
  -1  -5  14 26380.9 580.473  11
   1   5 -14 25666.0 590.143  11
   1   5 -14 24475.3 543.401  10
  -1   5  14 26621.2 539.822   4
  -1  -5  14 25357.3 574.632   8
  -1   5  14 24815.3 643.960   6
   1  -5 -14 23845.7 606.090   7
  -1   5  14 25510.7 692.736   5
  -1  -5  13 7910.19 241.492   2
   1  -5 -13 7869.64 236.960   2
   1   5 -13 8596.54 256.282   3
  -1   5  13 8018.68 261.642   1
  -1  -5  13 8119.96 213.265   1
  -1  -5  13 8417.76 239.924  11
   1   5 -13 7891.76 249.355  11
   1   5 -13 7559.40 215.488  10
  -1   5  13 7811.93 211.732   4
  -1  -5  13 7883.39 236.248   8
   1  -5 -13 7628.58 262.298   7
  -1   5  13 7936.34 288.683   6
  -1   5  13 8068.42 323.604   5
   1   5 -12 81.8838 36.3661   3
   1  -5 -12 153.569 35.6837   2
  -1  -5  12 43.7866 28.0642   2
  -1   5  12 155.054 39.6117   1
  -1  -5  12 46.6912 22.8829   1
  -1  -5  12 98.4630 30.8898  11
   1   5 -12 145.223 39.7751  11
   1   5 -12 130.362 30.9430  10
  -1   5  12 12.6677 47.1192   5
  -1   5  12 80.6007 27.5551   4
   1   5 -12 99.4356 20.7166   9
   1  -5 -12 74.7918 38.5899   7
  -1   5  12 59.1394 41.5192   6
  -1  -5  11 967.047 69.7309   2
   1   5 -11 1046.88 78.0702   3
  -1   5  11 987.795 77.2841   1
  -1  -5  11 1070.82 55.6205   1
  -1  -5  11 1027.83 66.1336  11
   1   5 -11 1100.15 79.2119  11
   1   5 -11 989.119 63.6350  10
  -1   5  11 1090.38 64.8306   4
   1   5 -11 1007.16 48.2703   9
  -1   5  11 1025.82 94.8799   6
  -1   5  11 1065.35 105.872   5
  -1  -5  10 12543.8 312.598   2
   1   5 -10 13021.0 335.259   3
  -1  -5  10 12769.7 274.154   1
  -1   5  10 12089.3 329.246   1
  -1  -5  10 12594.5 301.751  11
   1   5 -10 12362.1 325.770  11
   1   5 -10 12022.5 299.065  10
  -1   5  10 12673.8 303.938   4
  -1  -5  10 12206.8 318.808   3
   1   5 -10 12081.1 266.488   9
  -1   5  10 12797.3 371.719   6
   1  -5 -10 11550.6 331.878   7
  -1   5  10 12159.3 395.106   5
   1   5  -9 3323.86 138.701   3
  -1  -5   9 2975.29 117.559   2
  -1   5   9 2852.03 128.310   1
   1  -5  -9 2960.69 133.310   1
  -1  -5   9 2908.73 89.0309   1
  -1  -5   9 3045.69 112.717  11
   1   5  -9 2940.44 129.098  11
   1   5  -9 2911.96 115.398  10
  -1   5   9 3036.53 118.029   4
  -1  -5   9 3067.33 126.545   3
   1   5  -9 2998.66 91.7204   9
  -1  -5   9 2903.20 120.873   8
  -1   5   9 2911.72 151.490   6
   1  -5  -9 2790.75 154.379   6
   1  -5  -9 2837.69 132.215   7
  -1   5   9 2998.74 171.573   5
  -1  -5   8 64043.8 1221.56   2
  -1   5   8 63359.8 1245.32   1
  -1  -5   8 62348.7 1170.22   1
  -1  -5   8 63014.7 1210.48  11
   1   5  -8 64658.9 1250.22  11
   1   5  -8 62737.0 1224.66  10
   1   5  -8 62987.8 1182.81   9
  -1   5   8 64202.9 1231.63   4
  -1  -5   8 62135.8 1243.41   3
  -1  -5   8 65610.5 1235.79   8
   1  -5  -8 63040.4 1302.91   6
   1  -5  -8 61957.6 1253.05   7
  -1   5   8 64571.9 1296.03   6
  -1   5   8 64623.5 1343.58   5
  -1  -5   7 38002.9 764.411   2
  -1   5   7 38022.1 785.113   1
  -1  -5   7 37932.7 760.062  11
   1   5  -7 38719.3 797.967  11
   1   5  -7 38660.6 738.948   9
  -1  -5   7 38636.0 796.472   3
  -1   5   7 37488.3 782.747   4
  -1  -5   7 38598.7 781.428   8
   1  -5  -7 38763.4 801.715   7
   1  -5  -7 39146.9 845.604   6
  -1   5   7 38121.8 833.769   6
  -1   5   7 38284.2 876.130   5
   1  -5  -7 36047.8 842.032   5
   1  -5  -6 62041.7 1237.21   3
  -1  -5   6 63961.3 1202.69   2
   1   5  -6 63056.0 1237.49  11
  -1  -5   6 64299.5 1203.99  11
  -1  -5   6 63214.4 1238.32   3
   1  -5  -6 64566.9 1235.53   1
  -1   5   6 62054.1 1221.17   1
  -1  -5   6 62267.8 1147.25   1
  -1  -5   6 63539.4 1222.26   8
  -1   5   6 63824.8 1273.60   6
   1  -5  -6 63963.4 1284.00   6
   1  -5  -6 62448.1 1240.02   7
   1  -5  -6 63658.2 1289.26   5
   1   5  -6 59439.5 1227.71   5
  -1   5   6 62009.5 1313.91   5
  -1  -5   5 2404.69 93.7717  11
  -1  -5   5 2389.98 108.998   3
  -1  -5   5 2317.95 101.661   8
   1   5  -5 2138.37 101.534   5
   1  -5  -5 2244.81 123.130   5
  -1   5   5 2370.94 138.060   5
   1  -5  -5 2536.25 111.422   7
   1  -5  -5 2222.98 101.264   1
  -1   5   5 2276.04 97.0176   1
  -1  -5   4 14293.6 357.484   3
   1  -5  -4 14866.2 342.996   1
  -1   5   4 14459.0 332.335   1
  -1  -5   4 14586.8 334.112  11
   1   5  -4 14555.1 332.325   8
   1  -5  -4 14199.6 351.441   7
   1  -5  -4 14400.9 381.101   5
  -1   5   4 14684.5 405.930   5
   1   5  -4 15223.4 359.065   5
  -1  -5   3 1369.28 79.3517   3
  -1   5   3 1337.00 64.6116   1
   1  -5  -3 1433.97 71.0026   1
  -1  -5   3 1362.80 70.5013  11
   1   5  -3 1212.72 67.6196   8
   1  -5  -3 1245.02 74.2787   7
   1  -5  -3 1446.71 90.7441   5
  -1   5   3 1279.92 96.1796   5
   1   5  -3 1387.79 80.5634   5
  -1  -5   2 9302.85 254.614   3
   1  -5  -2 9487.51 231.620   1
  -1   5   2 9464.16 223.355   1
  -1  -5   2 9206.26 189.307   1
  -1  -5   2 9312.39 242.514  11
   1   5  -2 9058.88 236.508   8
  -1   5   2 9224.88 260.017   8
  -1  -5   2 9390.84 249.884   6
  -1   5   2 9730.87 247.276   7
   1  -5  -2 8910.70 245.351   7
   1   5  -2 9219.27 259.099   5
   1  -5  -2 9571.91 270.855   5
  -1   5   2 9139.85 286.326   5
   1  -5  -1 3399.10 137.343   3
  -1  -5   1 3831.72 96.0628   1
  -1   5   1 3827.95 112.338   1
   1  -5  -1 3916.49 120.470   1
  -1  -5   1 4100.39 139.384  11
   1   5  -1 3640.38 130.346   8
  -1   5   1 4406.88 152.133   8
   1  -5  -1 3853.07 137.056   7
  -1  -5   1 3848.86 140.482   6
  -1   5   1 3899.72 134.246   7
  -1   5   1 3699.18 161.230   5
   1  -5  -1 3872.23 148.888   5
   1   5  -1 3704.14 148.480   5
   1  -5   0 112278. 2106.95   3
   1   5   0 114393. 2104.18   3
   1   5   0 109531. 2027.90   1
   1  -5   0 116076. 2055.54   1
  -1  -5   0 110988. 2093.74  11
   1  -5   0 108890. 2108.35  11
  -1  -5   0 106836. 2096.77   7
   1  -5   0 108739. 2084.57   7
   1   5   0 108048. 2083.80   8
  -1   5   0 108895. 2097.69   8
  -1   5   0 114178. 2086.19   7
  -1  -5   0 114912. 2102.97   6
   1  -5   0 111211. 2119.38   6
  -1  -5   0 110300. 2089.09   5
  -1   5   0 109627. 2132.85   5
   1   5   0 110308. 2120.97   5
   1  -5   1 10737.0 279.415   3
   1  -5   1 10531.6 233.830   1
   1   5   1 10073.6 225.067   1
   1  -5   1 9776.91 272.188  11
   1   5   1 10446.8 268.088   8
  -1   5  -1 10333.8 270.797   8
  -1  -5  -1 10419.8 275.045   7
  -1   5  -1 10349.9 261.820   7
  -1  -5  -1 10143.5 277.097   6
  -1   5  -1 9997.31 290.094   5
   1   5   1 9637.19 289.412   5
  -1  -5  -1 10194.9 272.552   5
   1  -5   2 113459. 2127.14   3
   1   5   2 109018. 2068.78   1
   1  -5   2 112349. 2062.91   1
   1  -5   2 111360. 2118.23  11
  -1   5  -2 114055. 2113.10   8
  -1  -5  -2 112016. 2122.30   7
  -1   5  -2 115705. 2108.53   7
  -1  -5  -2 112095. 2131.09   6
   1   5   2 112968. 2161.06   5
  -1  -5  -2 114691. 2131.93   5
  -1   5  -2 107541. 2136.39   5
  -1  -5  -3 768.853 60.9818   3
   1  -5   3 735.714 61.1055   3
   1  -5   3 782.041 40.7924   1
   1   5   3 758.525 46.7066   1
   1  -5   3 704.252 57.3947  11
   1  -5   3 819.915 64.1078   8
  -1   5  -3 705.986 56.8478   8
  -1  -5  -3 769.239 66.4372   6
  -1   5  -3 751.170 57.6393   7
  -1  -5  -3 766.136 61.4854   7
  -1   5  -3 777.079 66.4279   5
  -1  -5  -3 824.528 67.7799   5
   1   5   3 757.503 73.8224   5
   1  -5   4 29870.7 637.616   3
  -1  -5  -4 29405.3 629.281   3
   1   5   4 29871.9 603.473   1
   1  -5   4 29982.2 576.087   1
   1  -5   4 29524.2 623.663  11
  -1   5  -4 29226.7 620.918   8
   1  -5   4 28637.6 635.942   8
  -1  -5  -4 29624.0 638.799   7
   1   5   4 30219.6 650.399   6
  -1  -5  -4 30127.3 661.099   5
   1   5   4 28854.1 675.871   5
  -1   5  -4 28956.3 643.837   5
   1  -5   5 5527.50 182.395   3
  -1  -5  -5 5681.41 179.082   3
   1  -5   5 5562.73 171.299  11
  -1   5  -5 5407.18 191.376  11
   1   5   5 5290.51 163.455   1
   1  -5   5 5632.57 138.687   1
   1   5   5 5872.69 200.264   6
  -1  -5  -5 5597.62 186.069   7
   1   5   5 5637.53 216.793   5
  -1  -5  -5 5399.60 201.580   5
  -1   5  -5 5274.74 185.024   5
  -1  -5  -6 8532.26 238.756   3
  -1  -5  -6 8371.67 206.876   2
   1  -5   6 8270.44 243.871   3
  -1   5  -6 8559.41 258.341  11
   1  -5   6 8521.39 231.725  11
  -1   5  -6 9485.30 248.364  10
   1   5   6 8379.31 232.293   1
   1   5   6 8774.94 249.346   4
   1   5   6 8801.94 268.070   6
  -1  -5  -6 8795.26 254.807   7
   1   5   6 8420.40 286.339   5
  -1  -5  -6 8441.26 273.156   5
  -1   5  -7 817.925 64.2185   3
  -1  -5  -7 783.547 60.1458   3
  -1  -5  -7 849.697 50.3511   2
   1  -5   7 842.447 61.1092  11
  -1   5  -7 855.263 72.0375  11
  -1   5  -7 863.229 64.6577  10
   1   5   7 800.769 61.3701   1
   1  -5   7 830.224 64.4076   3
   1   5   7 916.549 68.5802   4
  -1  -5  -7 841.543 69.6714   7
   1   5   7 856.035 77.0337   6
   1   5   7 739.524 81.2981   5
  -1  -5  -7 702.978 76.5201   5
  -1  -5  -8 62915.6 1240.85   3
  -1  -5  -8 63759.0 1207.57   2
  -1   5  -8 65441.7 1256.44   3
   1   5   8 61881.4 1244.44   1
   1  -5   8 63664.9 1230.97  11
  -1   5  -8 64634.1 1270.81  11
  -1   5  -8 63283.2 1242.56  10
  -1   5  -8 62509.4 1165.94   9
   1   5   8 63270.8 1246.65   4
   1  -5   8 61955.7 1246.56   3
   1   5   8 64853.9 1299.93   6
  -1  -5  -8 62730.7 1264.44   7
  -1  -5  -8 62459.5 1310.93   5
   1   5   8 64026.2 1328.84   5
   1  -5   9 1056.38 72.6500   2
  -1   5  -9 1237.43 81.9224   3
  -1  -5  -9 1053.15 64.4160   2
  -1  -5  -9 1140.24 74.5996   3
   1   5   9 1208.44 81.2816   1
   1  -5   9 1188.98 72.1231  11
  -1   5  -9 1108.01 83.6780  11
  -1   5  -9 1228.72 78.3302  10
   1  -5   9 1240.21 79.2120   3
   1   5   9 1076.30 74.7525   4
  -1   5  -9 1089.88 39.8767   9
  -1  -5  -9 1119.26 82.9858   7
   1   5   9 1042.78 90.5768   6
   1   5   9 1188.85 108.560   5
  -1  -5  -9 1169.37 102.988   5
  -1  -5 -10 58143.8 1148.47   3
   1  -5  10 59708.9 1156.08   2
  -1  -5 -10 58668.3 1128.74   2
  -1   5 -10 62277.5 1171.57   3
   1   5  10 58620.8 1170.55   1
  -1   5 -10 62716.2 1187.44  11
   1  -5  10 59299.5 1145.09  11
  -1   5 -10 59254.7 1153.92  10
   1   5  10 59590.7 1153.23   4
   1  -5  10 58607.3 1156.12   3
  -1   5 -10 55194.7 1065.49   9
   1  -5  10 59335.5 1170.84   8
   1   5  10 57722.0 1216.41   6
  -1  -5 -10 56700.8 1182.21   7
  -1  -5 -10 57120.9 1240.00   5
   1   5  10 58763.0 1256.71   5
  -1  -5 -11 6239.54 199.079   3
  -1   5 -11 6748.20 214.485   3
   1  -5  11 6378.15 206.482   2
   1   5  11 6255.93 215.648   1
   1  -5  11 6672.53 203.428  11
  -1   5 -11 6439.82 219.650  11
  -1   5 -11 6564.91 204.258  10
   1  -5  11 6439.35 203.515   3
   1   5  11 6543.75 201.950   4
   1  -5  11 6487.24 213.502   8
   1   5  11 6602.55 248.791   6
  -1  -5 -11 6540.84 228.446   7
   1   5  11 6673.71 269.834   5
  -1  -5 -11 6375.98 261.513   5
  -1   5 -12 5918.22 197.666   3
   1  -5  12 5738.66 193.206   2
   1   5  12 5418.63 200.089   1
   1  -5  12 5392.11 182.827  11
  -1   5 -12 5941.67 207.632  11
  -1   5 -12 5273.53 179.404  10
   1  -5  12 5169.68 179.051   3
   1   5  12 5127.93 176.264   4
   1  -5  12 5370.30 192.741   8
  -1  -5 -12 5620.38 209.193   7
   1   5  12 5364.89 225.976   6
   1   5  12 5580.38 250.095   5
  -1  -5 -12 5207.19 242.043   5
  -1  -5 -13 5856.42 187.531   2
  -1   5 -13 5967.65 204.948   3
   1  -5  13 5908.03 204.442   2
   1   5  13 5657.72 212.038   1
   1  -5  13 5777.38 197.514  11
  -1   5 -13 6225.18 217.213  11
  -1   5 -13 5539.30 189.146  10
   1   5  13 6287.72 269.391   5
   1  -5  13 5909.17 205.256   8
  -1  -5 -13 5839.63 221.520   7
   1   5  13 5790.07 240.993   6
  -1  -5 -13 5865.09 262.830   5
  -1   5 -14 24863.6 546.476   3
   1  -5  14 23506.6 544.994   2
  -1  -5 -14 23134.0 519.811   2
   1   5  14 22437.7 558.505   1
  -1   5 -14 23447.5 555.254  11
   1  -5  14 23899.7 539.860  11
  -1   5 -14 22319.8 520.342  10
   1   5  14 22639.1 630.880   5
   1  -5  14 22645.5 538.662   8
  -1  -5 -14 22330.6 565.278   7
   1   5  14 22223.6 596.467   6
  -1  -5 -14 22118.4 630.988   5
  -1   5 -15 8175.89 254.406   3
  -1  -5 -15 8278.47 243.174   2
   1  -5  15 7940.02 257.038   2
  -1   5 -15 8287.10 268.081  11
   1  -5  15 8286.60 257.703  11
  -1   5 -15 7473.10 236.291  10
   1   5  15 7517.43 265.175   1
   1   5  15 8361.73 329.550   5
  -1  -5 -15 7711.50 274.490   7
   1   5  15 8117.52 304.235   6
  -1  -5 -15 7701.53 325.511   5
   1  -5  16 35046.0 770.367   2
  -1  -5 -16 34759.3 742.503   2
  -1   5 -16 37066.0 761.913   3
  -1   5 -16 36143.0 782.751  11
   1  -5  16 35094.1 770.546  11
  -1   5 -16 32522.9 739.180  10
   1   5  16 33667.2 784.524   1
   1   5  16 34778.0 866.303   5
  -1  -5 -16 33646.1 794.628   7
   1   5  16 34125.1 835.867   6
  -1  -5 -16 33006.5 872.961   5
   1  -5  17 7122.44 229.229   1
   1   5  17 7407.44 270.138   1
  -1   5 -17 6830.56 234.767  10
   1  -5  17 7694.06 261.217  11
  -1   5 -17 8134.91 268.506  11
   1   5  17 7377.93 316.952   5
  -1  -5 -17 7164.81 272.546   7
   1   5  17 7565.25 303.813   6
  -1   5 -17 8128.77 251.844   3
  -1  -5 -17 7951.89 244.615   2
   1  -5  17 7548.09 257.563   2
   1  -5  18 20195.8 487.759   1
   1   5  18 20132.7 536.810   1
  -1   5 -18 18733.8 490.727  10
   1  -5  18 21502.7 532.913  11
  -1   5 -18 21784.6 531.647  11
   1   5  18 21543.5 616.216   5
   1   5  18 20097.0 581.564   6
  -1  -5 -18 19663.2 541.179   7
   1  -5  18 20816.8 523.145   2
  -1  -5 -18 20620.2 496.543   2
  -1   5 -18 21537.9 505.518   3
   1   5  19 3319.91 177.798   1
   1  -5  19 3304.58 150.918   1
  -1   5 -19 3126.70 152.825  10
   1   5  19 3685.86 217.922  10
  -1   5 -19 3553.84 172.570  11
   1   5  19 3615.87 217.262   5
  -1  -5 -19 3515.80 185.702   7
   1   5  19 3464.23 204.569   6
  -1   5 -19 3800.54 162.039   3
  -1  -5 -19 3512.58 158.147   2
   1  -5  19 3498.17 170.841   2
   1  -5  20 1241.24 94.3998   1
   1   5  20 1406.18 120.010   1
  -1   5 -20 1082.51 94.8493  10
  -1   5 -20 1338.80 111.221  11
   1   5  20 1319.21 137.780  10
   1   5  20 1342.55 139.595   5
  -1  -5 -20 1391.08 119.879   7
   1   5  20 1367.40 131.488   6
  -1  -5 -20 1374.81 100.160   2
   1  -5  20 1403.43 112.530   2
  -1   5 -20 1460.66 100.582   3
   1   5  21 4812.59 227.541   1
   1  -5  21 5030.25 199.350   1
  -1   5 -21 4824.99 204.391  10
   1   5  21 5002.89 254.970  10
  -1   5 -21 5308.78 224.888  11
  -1  -5 -21 4772.89 230.072   7
   1   5  21 5016.26 256.426   6
  -1   5 -21 5307.25 202.190   3
   1  -5  21 4943.65 216.544   2
  -1  -5 -21 5434.69 206.079   2
   1   5  22 2786.34 175.689   1
   1  -5  22 2940.43 152.744   1
  -1   5 -22 2821.82 155.139  10
   1   5  22 2900.30 197.813  10
  -1   5 -22 2984.02 169.390  11
  -1   5 -22 3038.64 207.283   5
  -1  -5 -22 3101.38 184.592   7
   1   5  22 3168.75 201.872   6
  -1   5 -22 3200.02 153.686   3
   1  -5  22 3069.37 168.873   2
  -1  -5 -22 3190.47 158.954   2
   1  -5  23 13207.1 378.950   1
   1   5  23 12530.6 414.514   1
   1   5  23 12944.3 449.564  10
  -1   5 -23 12026.1 376.631  10
  -1   5 -23 13490.8 405.691  11
   1   5  23 13185.2 461.216   6
  -1  -5 -23 12465.2 419.058   7
  -1   5 -23 14189.9 376.590   3
  -1  -5 -23 13345.6 381.908   2
   1  -5  23 13081.6 402.872   2
  -1   5 -23 12466.8 464.079   5
  -1   5 -24 5329.24 234.372  11
  -1   5 -24 5151.65 286.209   5
  -1  -5 -24 4896.75 212.410   2
  -1   5 -24 5307.52 208.025   3
   1  -5  24 4744.36 205.877   1
  -1   5 -25 2913.74 221.262   5
  -1  -5 -25 3111.74 168.300   2
  -1   5 -25 2996.43 154.401   3
   1  -5  25 2679.12 156.030   1
  -1   5 -26 8966.63 288.368   3
   1  -5  26 8553.95 299.091   1
  -1   5 -27 503.008 77.3865   3
   1  -5  27 560.921 85.0674   1
   1   7 -25 204.396 84.9273   5
   1  -7 -25 183.262 66.8936   3
  -1  -7  24 8278.11 281.129   8
   1   7 -24 7367.69 333.816   5
   1  -7 -24 8062.87 278.591   3
   1   7 -23 8401.56 315.264  11
  -1  -7  23 7843.65 272.785   8
   1   7 -23 7725.94 332.545   5
  -1  -7  23 7679.50 242.086   1
   1  -7 -23 8153.89 280.611   3
   1  -7 -23 8697.79 290.234   2
   1   7 -22 5894.93 250.525  11
  -1  -7  22 5345.06 213.318   8
   1   7 -22 4600.86 250.720   5
   1  -7 -22 4952.21 210.633   3
   1  -7 -22 5362.45 216.789   2
   1   7 -22 5483.51 234.414   3
  -1  -7  22 5080.42 182.481   1
  -1   7  21 9434.80 337.879   1
  -1  -7  21 9278.65 267.234   1
  -1  -7  21 9588.52 304.092   8
   1   7 -21 10443.6 347.141  11
  -1  -7  21 9486.66 318.718   2
   1   7 -21 10521.5 336.495   3
   1  -7 -21 10042.5 312.568   2
   1  -7 -20 3455.74 162.564   2
   1   7 -20 3303.36 172.853   3
  -1  -7  20 3474.42 170.524   2
  -1  -7  20 3169.16 130.637   1
  -1   7  20 3142.33 177.744   1
   1   7 -20 3440.54 182.858  11
   1   7 -20 2939.43 136.663  10
  -1  -7  20 3296.71 159.609   8
  -1   7  20 2973.53 198.529   6
   1  -7 -20 3420.83 190.486   7
   1  -7 -20 3060.17 220.723   5
   1  -7 -19 2063.29 122.131   2
   1   7 -19 2128.87 136.476   3
  -1  -7  19 2118.13 131.227   2
  -1   7  19 2096.25 141.410   1
  -1  -7  19 1851.98 94.1971   1
   1   7 -19 2228.74 143.405  11
  -1  -7  19 2125.63 133.028  11
   1   7 -19 1800.34 103.937  10
  -1   7  19 2197.02 189.935   5
  -1  -7  19 2048.50 123.796   8
   1  -7 -19 1963.95 144.536   7
  -1   7  19 2118.65 163.879   6
   1  -7 -19 1915.08 172.048   5
   1   7 -18 104.176 49.8160   3
   1  -7 -18 44.0043 46.3238   3
   1  -7 -18 113.882 46.1011   2
  -1   7  18 113.114 51.9897   1
  -1  -7  18 121.773 35.5262   1
  -1  -7  18 112.280 49.6326   2
  -1  -7  18 95.8658 46.7451  11
   1   7 -18 155.528 60.5165  11
   1   7 -18 248.844 47.1377  10
  -1   7  18 258.411 89.9658   5
  -1  -7  18 190.671 50.4756   8
   1  -7 -18 50.3967 55.4233   7
  -1   7  18 105.877 69.3335   6
   1  -7 -18 126.048 73.5521   5
  -1  -7  17 7843.62 265.375   2
   1  -7 -17 7709.81 269.599   3
   1   7 -17 9000.60 296.445   3
   1  -7 -17 8331.58 259.733   2
  -1  -7  17 8373.30 270.334  11
   1   7 -17 8708.77 294.692  11
   1   7 -17 7120.63 229.179  10
  -1  -7  17 7710.26 214.175   1
  -1   7  17 7987.82 285.570   1
  -1  -7  17 8224.31 263.654   8
   1  -7 -17 7638.43 290.435   7
  -1   7  17 7754.07 319.813   6
   1  -7 -17 8091.72 346.443   5
  -1   7  17 7807.52 359.025   5
   1  -7 -16 22725.2 534.432   2
   1   7 -16 23900.5 576.073   3
   1  -7 -16 21197.9 548.350   3
  -1  -7  16 22969.8 546.677   2
   1   7 -16 24038.6 580.038  11
  -1  -7  16 23693.7 545.721  11
   1   7 -16 21582.8 505.445  10
  -1  -7  16 21416.0 473.650   1
  -1   7  16 22253.4 566.829   1
  -1  -7  16 22806.3 542.087   8
   1  -7 -16 22282.8 580.491   7
  -1   7  16 21960.0 616.805   6
   1  -7 -16 21370.2 640.781   5
  -1   7  16 23891.8 690.834   5
  -1  -7  15 6182.03 219.735   2
   1  -7 -15 6400.00 213.589   2
   1   7 -15 6553.45 243.455   3
   1  -7 -15 5919.68 227.884   3
  -1  -7  15 6191.99 214.689  11
   1   7 -15 6344.15 241.596  11
   1   7 -15 6023.90 198.020  10
  -1  -7  15 5667.06 164.540   1
  -1   7  15 5928.94 233.531   1
  -1  -7  15 6367.48 221.418   8
  -1   7  15 6001.72 268.232   6
   1  -7 -15 6044.38 242.938   7
   1  -7 -15 5857.69 284.855   5
  -1   7  15 6427.05 307.677   5
   1  -7 -14 26775.7 588.954   2
  -1  -7  14 26082.0 594.683   2
   1   7 -14 27530.7 634.241   3
   1  -7 -14 25527.5 612.242   3
  -1  -7  14 27313.1 589.561  11
   1   7 -14 26881.9 632.051  11
   1   7 -14 25149.1 569.579  10
  -1  -7  14 26047.4 519.630   1
  -1   7  14 25283.9 614.866   1
  -1  -7  14 27044.4 603.461   8
   1   7 -14 23720.6 508.877   9
  -1   7  14 26030.9 675.182   6
   1  -7 -14 25425.7 632.217   7
   1  -7 -14 25249.1 695.392   5
  -1   7  14 27131.2 737.163   5
   1   7 -13 1088.20 96.1730   3
  -1  -7  13 1053.93 82.1462   2
   1  -7 -13 1014.56 90.8375   3
   1  -7 -13 998.331 78.3493   2
  -1  -7  13 1034.45 49.9259   1
  -1   7  13 1053.17 90.8186   1
  -1  -7  13 1069.33 80.0100  11
   1   7 -13 946.679 93.3702  11
   1   7 -13 1084.26 80.3520  10
   1   7 -13 958.971 51.5267   9
  -1  -7  13 919.257 82.4110   8
   1  -7 -13 1075.79 97.4522   7
  -1   7  13 1037.29 106.962   6
  -1   7  13 1105.71 130.222   5
   1  -7 -13 1012.26 113.510   5
   1   7 -12 9882.61 306.756   3
   1  -7 -12 9226.89 294.246   3
   1  -7 -12 9351.40 266.386   2
  -1  -7  12 9368.77 271.828   2
  -1   7  12 9736.93 293.147   1
  -1  -7  12 9395.85 206.389   1
  -1  -7  12 10075.9 269.342  11
   1   7 -12 9823.40 308.214  11
   1   7 -12 9229.16 267.664  10
  -1  -7  12 9207.30 285.568   3
   1   7 -12 9126.03 218.001   9
  -1  -7  12 9808.09 284.848   8
   1  -7 -12 9302.82 303.855   7
  -1   7  12 9351.70 331.423   6
  -1   7  12 9491.12 372.248   5
   1  -7 -12 8485.17 334.878   5
  -1  -7  11 6550.46 207.833   2
   1  -7 -11 6628.06 204.913   2
   1  -7 -11 6131.58 228.872   3
   1   7 -11 7066.13 244.803   3
  -1  -7  11 6197.81 140.858   1
  -1   7  11 6264.62 220.178   1
  -1  -7  11 5907.43 136.852   1
   1   7 -11 6589.13 240.247  11
  -1  -7  11 6571.16 202.382  11
   1   7 -11 6479.23 210.166  10
  -1  -7  11 6538.28 225.136   3
  -1   7  11 6720.80 215.149   4
   1   7 -11 6745.69 253.309   7
   1   7 -11 6433.66 164.501   9
  -1  -7  11 6797.56 221.062   8
   1  -7 -11 6513.01 238.603   7
  -1   7  11 6594.33 260.766   6
  -1   7  11 6874.73 300.673   5
   1  -7 -11 6571.44 273.900   5
   1   7 -11 6284.36 224.669   5
   1  -7 -10 8191.89 238.844   2
   1  -7 -10 8097.37 269.486   3
  -1  -7  10 8221.50 241.247   2
   1   7 -10 9239.60 285.514   3
  -1   7  10 8229.54 256.815   1
  -1  -7  10 8343.36 237.528  11
   1   7 -10 8512.60 278.155  11
   1   7 -10 7977.47 246.769  10
  -1  -7  10 8118.24 262.653   3
  -1   7  10 8546.09 256.372   4
   1   7 -10 8037.16 202.764   9
   1   7 -10 9082.66 295.144   7
  -1  -7  10 8897.23 259.498   8
   1  -7 -10 8708.60 319.574   6
   1  -7 -10 8290.22 276.469   7
   1   7 -10 8118.66 265.822   5
  -1   7  10 8937.17 349.423   5
   1  -7 -10 7961.70 305.533   5
   1  -7  -9 7729.03 258.400   3
  -1  -7   9 7599.53 224.236   2
   1  -7  -9 7666.82 224.097   2
   1   7  -9 7914.78 263.030   3
  -1   7   9 7660.76 240.337   1
  -1  -7   9 7974.72 224.459  11
   1   7  -9 7355.92 235.603  10
   1   7  -9 7677.98 196.180   9
  -1  -7   9 7887.45 253.832   3
  -1   7   9 7560.89 244.671   4
  -1  -7   9 8389.50 248.452   8
   1   7  -9 8433.36 279.614   7
   1  -7  -9 8050.19 299.088   6
   1  -7  -9 7727.11 261.525   7
   1   7  -9 7140.75 248.069   5
   1  -7  -9 7289.41 284.472   5
  -1   7   9 7580.25 319.196   5
  -1  -7   8 29945.8 627.407   2
   1  -7  -8 28938.6 671.687   3
  -1   7   8 29499.7 645.185   1
  -1  -7   8 28957.0 627.123  11
   1   7  -8 29702.4 599.750   9
  -1   7   8 30031.9 667.747   4
  -1  -7   8 28742.7 667.998   3
  -1  -7   8 30988.2 656.736   8
   1  -7  -8 29096.5 673.974   7
   1   7  -8 32255.9 700.841   7
   1  -7  -8 29421.7 725.500   6
  -1   7   8 29913.9 765.194   5
   1   7  -8 28739.6 671.616   5
   1  -7  -8 28198.1 712.213   5
   1  -7  -7 503.037 64.6370   3
  -1  -7   7 506.297 49.9733   2
  -1   7   7 606.812 71.0733   4
  -1  -7   7 461.407 60.9277   3
  -1  -7   7 530.821 54.4000  11
  -1   7   7 387.118 53.4673   1
   1  -7  -7 579.459 64.2335   1
   1  -7  -7 542.994 67.2031   7
   1   7  -7 459.134 68.4930   7
   1  -7  -7 511.614 76.7246   5
  -1   7   7 487.026 92.2443   5
   1   7  -7 464.146 67.8100   5
   1  -7  -7 561.366 80.4973   6
   1  -7  -6 33270.9 749.864   3
  -1  -7   6 33923.2 692.837   2
  -1  -7   6 33920.1 707.260  11
  -1  -7   6 33415.3 746.129   3
  -1   7   6 33118.6 706.702   1
   1  -7  -6 34268.4 748.007   7
   1  -7  -6 34443.4 796.875   6
   1   7  -6 36308.8 764.801   7
   1  -7  -6 32435.4 776.960   5
  -1   7   6 33750.3 831.998   5
   1   7  -6 33523.1 753.732   5
   1  -7  -5 4782.74 190.380   3
   1   7  -5 5077.18 196.210   3
  -1  -7   5 4950.69 167.894  11
  -1  -7   5 4656.48 186.156   3
  -1   7   5 5015.32 203.683   8
   1  -7  -5 5131.49 212.593   5
  -1   7   5 5251.73 240.242   5
   1   7  -5 4833.36 194.925   5
   1  -7  -5 4817.58 212.465   6
   1   7  -5 5269.08 197.878   7
  -1   7   5 5120.40 186.669   7
   1  -7  -5 5193.26 192.257   7
  -1   7   5 4672.24 158.855   1
  -1  -7   4 7088.14 237.918   3
   1   7  -4 7494.82 244.920   3
  -1   7   4 6911.20 199.246   1
  -1  -7   4 7057.75 214.542  11
  -1   7   4 7010.16 248.274   8
   1   7  -4 7010.41 211.706   8
  -1   7   4 7086.50 228.722   7
   1  -7  -4 7300.90 265.342   6
   1   7  -4 7688.14 244.609   7
   1  -7  -4 7215.90 235.957   7
  -1   7   4 7117.23 283.612   5
   1  -7  -4 7219.41 253.158   5
   1   7  -4 6881.24 245.309   5
  -1  -7   3 232.551 46.6486   3
   1   7  -3 265.328 50.3699   3
  -1   7   3 293.924 35.4511   1
   1  -7  -3 326.070 41.2408   1
  -1  -7   3 393.038 50.7038  11
   1   7  -3 299.996 43.9315   8
  -1   7   3 288.352 52.3841   8
   1  -7  -3 379.439 54.6729   7
   1   7  -3 335.526 53.6559   7
   1  -7  -3 444.806 70.2248   6
  -1   7   3 279.747 47.9683   7
  -1   7   3 358.875 70.5652   5
   1  -7  -3 366.713 57.4747   5
   1   7  -3 311.010 55.7844   5
  -1   7   2 6646.32 183.621   1
   1  -7  -2 7003.47 196.906   1
   1  -7  -2 6710.43 241.923  11
  -1  -7   2 6712.06 215.543  11
   1  -7  -2 6974.87 228.492   7
   1   7  -2 6619.71 209.956   8
  -1   7   2 6752.24 233.900   8
   1  -7  -2 7294.31 256.250   6
   1   7  -2 7310.59 233.409   7
  -1   7   2 7251.90 223.919   7
   1  -7  -2 7209.12 241.660   5
  -1   7   2 6747.52 269.544   5
   1   7  -2 7183.47 252.410   5
   1  -7  -1 665.977 51.0882   1
   1  -7  -1 812.347 78.9880  11
  -1  -7   1 619.612 65.3510  11
   1   7  -1 761.501 67.4464   8
  -1   7   1 620.474 69.1066   8
  -1   7   1 762.531 66.8556   7
   1  -7  -1 761.862 81.5014   6
   1   7  -1 730.645 69.6379   7
  -1  -7   1 653.355 71.0565   6
  -1   7   1 756.818 90.3105   5
   1   7  -1 795.056 84.3761   5
   1  -7   0 11973.5 349.505   3
   1  -7   0 12673.2 294.395   1
   1  -7   0 12672.8 354.955  11
  -1  -7   0 13328.5 348.321  11
  -1   7   0 12493.5 344.916   8
   1   7   0 12559.2 335.913   8
   1  -7   0 13018.7 372.059   6
   1   7   0 13196.5 348.251   7
  -1   7   0 13104.7 336.428   7
  -1  -7   0 13226.4 356.778   6
  -1   7   0 12706.5 389.682   5
   1   7   0 12396.0 373.988   5
   1  -7   1 49437.5 1047.44   3
   1   7   1 48695.8 951.535   1
   1  -7   1 52172.1 968.744   1
   1  -7   1 50559.4 1043.85  11
  -1  -7  -1 49936.5 1040.99  11
   1   7   1 49406.0 1028.16   8
  -1  -7  -1 49569.5 1040.27   7
  -1   7  -1 48815.8 1028.82   8
  -1   7  -1 52056.7 1025.50   7
   1   7   1 49874.5 1032.97   7
   1  -7   1 50637.6 1063.45   6
  -1  -7  -1 51274.2 1054.33   6
  -1   7  -1 50056.5 1087.39   5
   1   7   1 49180.2 1084.23   5
  -1  -7  -1 51252.7 1036.36   5
  -1  -7  -2 20357.4 514.028   3
   1  -7   2 21628.7 528.653   3
   1  -7   2 22190.4 450.977   1
   1   7   2 21604.4 450.940   1
   1  -7   2 21556.9 516.878  11
  -1  -7  -2 21814.6 527.420   7
   1   7   2 21458.8 518.480   8
  -1   7  -2 21658.6 510.409   8
   1  -7   2 22010.6 539.675   6
   1   7   2 23632.8 526.202   7
  -1  -7  -2 22102.1 536.491   6
  -1   7  -2 22083.3 508.073   7
  -1  -7  -2 22384.2 527.350   5
   1   7   2 21567.8 567.383   5
  -1   7  -2 21632.2 560.019   5
  -1  -7  -3 44223.4 940.872   3
   1  -7   3 44657.0 950.841   3
   1   7   3 42266.0 873.021   1
   1  -7   3 45990.0 860.153   1
   1  -7   3 43240.3 929.714  11
  -1   7  -3 44256.0 924.554   8
   1   7   3 45468.3 949.498   8
  -1   7  -3 46987.4 932.299   7
  -1  -7  -3 45924.1 965.709   6
  -1  -7  -3 44193.2 948.415   7
   1   7   3 45783.0 942.333   7
   1   7   3 44718.3 1001.64   5
  -1  -7  -3 46086.0 959.356   5
  -1   7  -3 43321.0 976.063   5
   1  -7   4 5961.73 217.420   3
  -1  -7  -4 6205.74 217.458   3
   1  -7   4 6182.98 207.561  11
   1   7   4 6067.24 177.256   1
   1  -7   4 6291.30 155.462   1
  -1   7  -4 6104.61 204.248   8
   1   7   4 6113.71 222.424   8
  -1   7  -4 6431.97 211.084   7
   1   7   4 6301.97 218.013   7
  -1  -7  -4 6267.28 222.689   7
  -1  -7  -4 6168.07 231.836   6
  -1   7  -4 5871.09 232.033   5
   1   7   4 6346.18 257.654   5
  -1  -7  -4 6113.43 226.166   5
  -1  -7  -5 1512.29 100.295   3
   1  -7   5 1651.28 106.649   3
   1  -7   5 1641.61 97.5043  11
   1   7   5 1716.56 112.138   4
   1  -7   5 1606.90 63.4615   1
   1   7   5 1628.26 83.7120   1
  -1   7  -5 1787.12 103.244   7
  -1  -7  -5 1607.59 106.874   7
   1   7   5 1551.17 103.014   7
  -1  -7  -5 1524.62 110.587   6
  -1   7  -5 1615.98 113.481   5
  -1  -7  -5 1645.48 112.700   5
   1   7   5 1609.94 127.382   5
   1  -7   6 5901.57 214.130   3
  -1  -7  -6 6096.47 215.108   3
  -1  -7  -6 5742.39 163.528   2
   1  -7   6 5796.80 145.873   1
   1   7   6 5785.07 182.070   1
   1  -7   6 5970.45 197.417  11
   1   7   6 6121.73 223.029   4
   1  -7   6 6191.53 216.961   8
  -1  -7  -6 5747.86 215.153   7
  -1  -7  -6 5697.19 228.722   6
  -1   7  -6 5830.70 205.563   7
  -1  -7  -6 6014.71 234.496   5
  -1   7  -6 5652.32 225.502   5
   1   7   6 5500.86 246.576   5
  -1   7  -7 16576.2 421.838   3
  -1  -7  -7 15775.2 353.612   2
  -1  -7  -7 15722.1 412.933   3
   1  -7   7 15424.5 327.461   1
   1   7   7 15635.3 379.570   1
   1  -7   7 15722.6 391.164  11
  -1   7  -7 14917.5 402.822  10
   1   7   7 16440.3 422.668   4
   1  -7   7 15423.5 410.152   3
   1  -7   7 16266.0 417.263   8
  -1  -7  -7 15858.2 422.141   7
  -1   7  -7 16909.2 417.686   7
  -1  -7  -7 15923.9 445.953   6
  -1  -7  -7 15147.5 439.373   5
   1   7   7 16362.7 480.084   5
  -1   7  -7 14888.1 424.386   5
  -1  -7  -8 30545.1 621.311   2
  -1   7  -8 30786.9 690.895   3
  -1  -7  -8 30250.2 682.222   3
   1   7   8 29208.8 654.912   1
   1  -7   8 30471.3 591.398   1
   1  -7   8 30216.9 658.317  11
  -1   7  -8 28443.6 670.552  10
   1   7   8 31150.8 690.291   4
   1  -7   8 29198.8 680.478   3
   1  -7   8 31426.0 691.973   8
  -1  -7  -8 30396.5 698.224   7
  -1   7  -8 32323.9 698.311   7
  -1   7  -8 29883.0 700.075   5
  -1  -7  -8 29755.8 727.520   5
   1   7   8 29909.8 765.072   5
   1  -7   9 26957.7 613.299   2
  -1   7  -9 29326.0 655.575   3
  -1  -7  -9 27766.2 583.987   2
  -1  -7  -9 28188.0 641.728   3
   1   7   9 27678.5 622.297   1
   1  -7   9 27513.5 553.188   1
   1  -7   9 27747.2 616.985  11
  -1   7  -9 26675.7 631.818  10
  -1   7  -9 27621.9 547.765   9
   1   7   9 28385.5 645.669   4
   1  -7   9 27318.1 641.622   3
   1  -7   9 28727.5 650.574   8
  -1   7  -9 30973.9 665.869   7
  -1  -7  -9 29230.7 665.768   7
   1   7   9 28801.0 686.800   6
  -1   7  -9 29354.5 668.257   5
   1   7   9 28791.2 730.944   5
  -1  -7  -9 27134.6 695.317   5
  -1  -7 -10 22063.3 525.091   3
   1  -7  10 21369.0 505.430   2
  -1   7 -10 22614.9 539.011   3
   1   7  10 21012.7 513.639   1
   1  -7  10 21750.3 442.839   1
   1  -7  10 21580.6 501.538  11
  -1   7 -10 22885.4 564.783  11
  -1   7 -10 21157.4 517.800  10
   1  -7  10 21783.7 527.276   3
   1   7  10 22392.0 526.699   4
  -1   7 -10 23366.0 548.817   7
  -1   7 -10 20758.4 426.243   9
   1  -7  10 22456.6 535.413   8
   1   7  10 21689.1 569.999   6
  -1  -7 -10 21924.1 547.239   7
  -1  -7 -10 21174.6 582.144   5
  -1   7 -10 21899.4 545.495   5
   1   7  10 22587.2 619.548   5
   1  -7  11 775.796 71.2170   2
  -1  -7 -11 876.327 79.5381   3
  -1   7 -11 872.484 83.6473   3
   1   7  11 795.427 77.5361   1
  -1   7 -11 1124.96 101.040  11
   1  -7  11 872.848 74.0253  11
  -1   7 -11 858.559 78.7203  10
   1  -7  11 755.572 75.8546   3
   1   7  11 798.959 77.9616   4
  -1   7 -11 803.400 88.4705   7
   1  -7  11 809.229 82.3905   8
  -1   7 -11 791.918 36.4367   9
  -1  -7 -11 691.791 81.4408   7
   1   7  11 721.792 90.8724   6
   1   7  11 816.781 108.980   5
  -1  -7 -11 720.754 97.5617   5
  -1  -7 -12 1629.69 87.6303   2
  -1   7 -12 1719.86 111.985   3
   1  -7  12 1637.65 100.379   2
  -1  -7 -12 1792.95 108.660   3
   1   7  12 1496.80 103.092   1
   1  -7  12 1510.79 95.8718  11
  -1   7 -12 1711.40 124.984  11
  -1   7 -12 1630.29 104.134  10
   1  -7  12 1648.99 105.065   3
   1   7  12 1728.38 104.357   4
  -1   7 -12 1295.99 43.5587   9
   1  -7  12 1644.73 110.995   8
  -1  -7 -12 1508.65 113.937   7
   1   7  12 1627.70 128.960   6
   1   7  12 1649.92 147.660   5
  -1  -7 -12 1539.73 132.704   5
  -1  -7 -13 10453.9 275.943   2
  -1  -7 -13 9894.26 302.089   3
   1  -7  13 9952.03 300.032   2
  -1   7 -13 10472.4 318.235   3
   1   7  13 10180.6 313.173   1
  -1   7 -13 10872.8 342.976  11
   1  -7  13 10488.1 295.663  11
  -1   7 -13 10018.3 298.517  10
   1  -7  13 9989.71 301.663   3
   1   7  13 10244.7 295.905   4
   1  -7  13 10649.7 319.229   8
  -1  -7 -13 10007.0 329.728   7
   1   7  13 9864.52 350.441   6
   1   7  13 11025.7 397.484   5
  -1  -7 -13 9663.30 364.483   5
  -1  -7 -14 2816.87 139.956   3
   1  -7  14 2888.13 143.836   2
  -1   7 -14 2801.17 147.423   3
  -1  -7 -14 3049.94 127.119   2
   1   7  14 2934.72 151.193   1
  -1   7 -14 2723.39 158.500  11
   1  -7  14 2858.09 137.111  11
  -1   7 -14 2659.38 132.947  10
   1  -7  14 2673.95 136.677   3
   1   7  14 2860.66 134.741   4
   1  -7  14 2695.34 146.983   8
   1   7  14 2699.26 172.478   6
  -1  -7 -14 2783.44 159.085   7
  -1  -7 -14 2558.81 178.836   5
   1   7  14 2810.76 192.969   5
  -1  -7 -15 999.359 76.8399   2
   1  -7  15 920.769 86.6157   2
  -1  -7 -15 947.693 84.7568   3
  -1   7 -15 1017.42 92.6858   3
   1  -7  15 851.113 62.6098   1
   1   7  15 854.465 91.1077   1
   1  -7  15 859.232 82.1323  11
  -1   7 -15 1069.09 105.981  11
  -1   7 -15 938.446 84.0477  10
   1   7  15 993.253 127.865   5
   1   7  15 1007.97 84.0565   4
   1  -7  15 898.822 89.1815   8
   1   7  15 1061.34 115.595   6
  -1  -7 -15 964.467 99.0536   7
  -1  -7 -15 854.597 114.839   5
  -1  -7 -16 27800.0 642.048   3
   1  -7  16 27968.6 654.151   2
  -1  -7 -16 28379.0 621.167   2
  -1   7 -16 28708.0 662.740   3
   1  -7  16 27484.1 593.300   1
   1   7  16 26919.1 668.230   1
  -1   7 -16 30154.8 702.766  11
   1  -7  16 28512.2 652.415  11
  -1   7 -16 26245.2 626.941  10
   1   7  16 28775.1 778.020   5
   1   7  16 27613.4 623.907   4
   1  -7  16 28766.7 664.196   8
  -1  -7 -16 27313.7 686.048   7
   1   7  16 27545.9 725.844   6
  -1  -7 -16 26867.8 752.226   5
   1  -7  17 1633.36 117.541   2
  -1  -7 -17 1734.01 111.561   3
  -1  -7 -17 1627.18 102.375   2
  -1   7 -17 1513.70 112.651   3
   1   7  17 1716.11 129.241   1
   1  -7  17 1598.53 91.6333   1
  -1   7 -17 1713.68 134.261  11
   1  -7  17 1644.55 116.414  11
  -1   7 -17 1508.23 104.134  10
   1   7  17 1543.02 102.627   4
   1   7  17 1609.98 164.910   5
   1  -7  17 1667.21 120.027   8
  -1  -7 -17 1587.57 130.367   7
   1   7  17 1548.35 144.808   6
  -1  -7 -17 1520.01 160.357   5
   1  -7  18 23497.5 580.430   2
  -1  -7 -18 23488.2 559.770   3
  -1   7 -18 24410.3 582.582   3
  -1  -7 -18 23499.2 545.153   2
   1   7  18 23126.3 598.869   1
   1  -7  18 23112.4 521.994   1
   1  -7  18 23830.3 581.339  11
  -1   7 -18 24658.8 618.185  11
  -1   7 -18 21214.1 545.775  10
   1   7  18 23197.5 689.911   5
   1  -7  18 23841.3 580.780   8
  -1  -7 -18 22142.4 606.881   7
   1   7  18 23413.6 655.473   6
  -1  -7 -18 22753.0 684.528   5
  -1   7 -19 271.802 66.1556   3
  -1  -7 -19 191.844 56.4324   3
   1  -7  19 211.175 47.5322   1
   1  -7  19 147.713 57.9800   2
  -1  -7 -19 237.201 55.4218   2
   1   7  19 142.089 64.8511   1
   1  -7  19 249.314 61.9869  11
  -1   7 -19 259.637 74.0827  11
  -1   7 -19 188.471 53.8452  10
   1   7  19 106.701 84.1125   5
   1  -7  19 321.458 75.3354   8
  -1  -7 -19 184.100 70.0984   7
   1   7  19 333.924 87.5422   6
  -1  -7 -19 214.075 84.3773   5
  -1  -7 -20 1974.91 120.726   3
   1  -7  20 2285.76 141.732   2
  -1  -7 -20 2119.43 121.407   2
  -1   7 -20 2150.49 135.736   3
  -1   7 -20 2129.30 150.262  11
   1  -7  20 2087.36 140.195  11
  -1   7 -20 1840.70 118.257  10
   1  -7  20 2023.26 130.811   8
  -1  -7 -20 1766.51 171.002   5
   1   7  20 1911.37 162.363   6
  -1  -7 -20 1998.76 150.119   7
   1   7  20 2042.84 145.307   1
   1  -7  20 1878.69 105.979   1
  -1   7 -21 3477.41 193.568  11
  -1  -7 -21 3337.07 160.104   3
   1  -7  21 3442.05 179.718   2
  -1  -7 -21 3656.12 164.604   2
  -1   7 -21 3615.47 175.247   3
   1  -7  21 3216.10 144.792   1
   1   7  21 3202.21 185.806   1
   1  -7  21 3379.75 171.177   8
  -1   7 -22 2284.84 163.137  11
  -1  -7 -22 2353.44 134.065   2
  -1  -7 -22 2291.46 131.258   3
  -1   7 -22 2169.33 138.620   3
   1  -7  22 2145.04 119.983   1
   1  -7  22 2338.05 144.613   8
  -1   7 -23 24.0878 52.8806   3
  -1  -7 -23 4.01915 50.1871   3
  -1  -7 -23 17.4057 54.3360   2
   1  -7  23-18.2197 46.1184   1
   1  -7  23 113.378 65.3533   8
  -1  -7 -24 7158.16 255.816   2
  -1  -7 -24 6845.71 238.872   3
   1  -7  24 6728.47 233.931   1
   1  -9 -20 503.310 73.5681   2
  -1  -9  20 438.839 77.8155   8
  -1  -9  19 23.5358 62.9115  11
   1  -9 -19-10.6508 56.7142   3
  -1  -9  19 73.6071 50.2047   2
   1  -9 -19 75.2997 47.1901   2
  -1  -9  19 49.5722 52.0248   8
  -1  -9  18 538.623 78.6589  11
   1   9 -18 535.859 94.7349  11
  -1  -9  18 435.125 74.6277   8
   1  -9 -18 588.845 88.4928   3
   1  -9 -18 541.362 70.2851   2
  -1   9  18 655.848 87.0877   1
  -1  -9  18 499.854 72.0810   2
   1  -9 -17-7.42778 47.4173   2
  -1   9  17 40.5357 51.5426   1
  -1  -9  17 17.0664 44.2841   2
  -1  -9  17-4.22559 47.1941  11
  -1   9  17 25.0684 42.8631   4
  -1  -9  17-22.0147 52.9419   8
   1   9 -17 32.2978 52.0656   5
   1  -9 -17 63.5069 58.7700   3
  -1  -9  16 7326.06 251.511   2
   1  -9 -16 7683.32 243.468   2
   1  -9 -16 7297.53 277.054   3
  -1   9  16 7001.76 265.417   1
  -1  -9  16 7564.74 253.051  11
   1   9 -16 6810.52 232.799  10
  -1   9  16 7779.09 237.479   4
  -1  -9  16 7591.92 260.006   8
   1  -9 -16 6951.33 284.901   7
   1   9 -16 7212.76 274.934   5
   1  -9 -15 1063.85 109.050   3
  -1  -9  15 1057.58 91.9726   2
   1  -9 -15 1109.39 88.0372   2
  -1   9  15 1040.73 99.4224   1
  -1  -9  15 1018.51 87.6840  11
   1   9 -15 987.445 87.4320  10
  -1   9  15 984.432 87.2177   4
  -1  -9  15 1166.25 99.0463   8
   1  -9 -15 1062.10 111.290   7
   1   9 -15 1301.64 130.091   7
   1  -9 -15 1134.96 132.505   5
   1   9 -15 1089.24 108.255   5
   1  -9 -14 14394.0 371.113   2
  -1  -9  14 14243.7 381.876   2
   1  -9 -14 14866.0 426.487   3
  -1   9  14 13344.2 393.701   1
  -1  -9  14 14808.8 378.613  11
   1   9 -14 13242.7 374.523  10
  -1   9  14 14417.0 382.313   4
  -1  -9  14 14673.1 395.631   8
   1  -9 -14 14176.7 429.241   7
   1   9 -14 15315.2 457.344   7
   1   9 -14 13909.1 419.481   5
  -1   9  14 14791.1 526.779   5
   1  -9 -14 13536.7 466.827   5
   1   9 -13 1983.37 139.354   3
   1  -9 -13 1897.18 105.603   2
   1  -9 -13 1807.45 131.481   3
  -1  -9  13 1963.07 112.682   2
  -1   9  13 1806.08 119.071   1
  -1  -9  13 1844.16 106.814  11
   1   9 -13 1833.88 114.546  10
  -1  -9  13 1957.48 127.108   3
  -1   9  13 1828.30 117.525   4
  -1  -9  13 2000.33 122.597   8
   1   9 -13 2038.58 149.800   7
   1  -9 -13 1838.55 135.519   7
  -1   9  13 2252.65 195.231   5
   1   9 -13 1739.23 130.085   5
   1  -9 -13 1705.30 149.674   5
   1  -9 -12 3036.21 132.453   2
   1  -9 -12 2871.05 161.908   3
  -1  -9  12 2682.03 130.731   2
   1   9 -12 2916.71 165.417   3
  -1   9  12 2912.53 145.799   1
  -1  -9  12 3011.62 134.990  11
   1   9 -12 2735.84 141.233  10
  -1   9  12 3147.51 152.626   4
  -1  -9  12 2768.38 151.267   3
   1   9 -12 2738.65 97.0499   9
   1  -9 -12 2846.60 161.629   7
   1   9 -12 3202.67 179.684   7
   1   9 -12 2715.34 160.281   5
   1  -9 -12 2781.39 182.451   5
  -1   9  12 2968.04 214.721   5
   1  -9 -11 2457.75 117.116   2
   1   9 -11 2941.65 161.375   3
   1  -9 -11 2676.14 157.027   3
  -1  -9  11 2701.17 125.347   2
  -1   9  11 2346.51 128.191   1
  -1  -9  11 2748.75 124.767  11
   1   9 -11 2350.68 131.531  10
  -1  -9  11 2596.46 146.082   3
  -1   9  11 2762.65 144.721   4
   1   9 -11 2471.12 94.1837   9
   1  -9 -11 2673.30 155.309   7
   1   9 -11 2598.97 158.725   7
  -1   9  11 2752.21 204.288   5
   1  -9 -11 2674.20 173.383   5
   1   9 -11 2282.03 144.337   5
   1  -9 -10 1650.12 122.699   3
   1   9 -10 1845.43 127.923   3
   1  -9 -10 1715.22 95.2771   2
  -1  -9  10 1819.43 98.9124   2
  -1   9  10 1454.85 98.6844   1
  -1  -9  10 1670.36 98.7948  11
   1   9 -10 1654.28 77.3637   9
   1   9 -10 1750.28 113.872  10
  -1  -9  10 1751.96 119.947   3
  -1   9  10 1504.03 111.031   4
   1   9 -10 1916.80 133.024   7
   1  -9 -10 1673.19 124.865   7
   1  -9 -10 1542.56 142.871   6
  -1   9  10 1643.66 159.387   5
   1  -9 -10 1653.90 137.862   5
   1   9 -10 1544.05 120.418   5
   1  -9  -9 2455.77 113.939   2
   1   9  -9 2322.34 145.241   3
   1  -9  -9 2730.04 156.280   3
  -1  -9   9 2404.26 115.227   2
  -1   9   9 2374.24 122.589   1
  -1  -9   9 2454.76 118.909  11
   1   9  -9 2396.74 98.3687   9
   1   9  -9 2310.18 132.745  10
  -1  -9   9 2342.65 140.143   3
  -1   9   9 2312.09 140.208   4
  -1   9   9 2317.12 155.706   8
   1  -9  -9 2240.32 142.355   7
   1  -9  -9 2398.31 173.713   6
   1   9  -9 2509.17 152.517   7
  -1   9   9 2453.29 190.860   5
   1  -9  -9 2312.52 161.945   5
   1   9  -9 2326.92 147.886   5
   1  -9  -8 9995.59 269.516   2
  -1  -9   8 9519.47 265.157   2
   1  -9  -8 9812.77 327.552   3
  -1  -9   8 9690.85 276.847  11
  -1   9   8 10289.1 326.159   4
  -1  -9   8 9550.91 312.944   3
  -1   9   8 9433.80 278.509   1
  -1   9   8 9775.03 342.006   8
   1   9  -8 10761.8 335.024   7
   1  -9  -8 10061.0 366.469   6
  -1  -9   8 10197.4 311.651   6
   1  -9  -8 8980.52 310.563   7
   1   9  -8 9213.31 326.668   5
   1  -9  -8 9640.15 342.420   5
  -1   9   8 9818.32 390.899   5
  -1  -9   7 20415.9 465.555   2
   1  -9  -7 21443.8 548.630   3
  -1  -9   7 20970.3 486.248  11
  -1   9   7 21197.1 544.833   4
  -1  -9   7 20386.1 530.241   3
  -1   9   7 19837.9 476.258   1
  -1   9   7 20237.3 556.214   8
  -1  -9   7 20399.6 520.470   6
   1  -9  -7 20630.3 532.740   7
   1  -9  -7 20856.3 583.103   6
   1   9  -7 22710.1 550.829   7
   1  -9  -7 20561.7 560.060   5
   1   9  -7 19655.8 547.526   5
  -1   9   7 21060.6 627.327   5
   1  -9  -6 16518.9 461.468   3
  -1  -9   6 15987.6 382.253   2
  -1  -9   6 16626.6 410.683  11
  -1  -9   6 15895.1 445.815   3
  -1   9   6 16509.4 394.618   1
  -1   9   6 15847.8 466.119   8
  -1  -9   6 16657.2 446.626   6
   1   9  -6 18127.9 466.354   7
   1  -9  -6 16808.8 497.973   6
   1  -9  -6 16573.8 452.210   7
   1  -9  -6 16299.0 471.924   5
  -1   9   6 17267.1 540.249   5
   1   9  -6 16094.3 471.301   5
   1  -9  -5 13690.0 402.466   3
  -1  -9   5 13143.2 322.607   2
   1  -9  -5 13352.4 412.278  11
  -1  -9   5 13520.0 355.079  11
  -1  -9   5 13690.1 393.035   3
  -1   9   5 13375.3 330.827   1
  -1   9   5 13561.5 405.693   8
   1  -9  -5 13269.4 388.791   7
  -1  -9   5 13510.6 388.404   6
   1  -9  -5 13768.4 431.968   6
   1   9  -5 14059.6 396.291   7
   1   9  -5 13252.6 413.639   5
  -1   9   5 13355.9 459.314   5
   1  -9  -5 13070.2 404.390   5
  -1  -9   4 942.526 63.3752   2
   1  -9  -4 889.872 91.5940   3
  -1  -9   4 819.543 85.5680   3
   1  -9  -4 871.875 87.2918   7
  -1   9   4 1072.59 101.768   8
   1  -9  -4 1032.37 105.752  11
  -1  -9   4 858.792 78.8482  11
   1  -9  -4 902.926 104.855   6
  -1  -9   4 1083.55 98.6158   6
  -1   9   4 1141.86 95.3073   7
   1   9  -4 967.280 95.5156   7
   1   9  -4 952.453 107.033   5
  -1   9   4 938.466 118.933   5
   1  -9  -3 63.0801 44.3837   3
   1   9  -3 58.8435 41.4260   8
  -1   9   3 76.2918 52.0379   8
   1  -9  -3 46.0872 52.4536  11
  -1  -9   3 35.2587 40.9254  11
   1   9  -3 17.6190 48.0724   7
  -1   9   3 12.1018 47.0653   7
  -1  -9   3 68.4156 49.1815   6
  -1   9   3 101.841 64.8165   5
   1   9  -3 57.3573 55.4848   5
   1  -9  -3 92.7430 58.9697   6
  -1   9   2 170.084 56.6448   8
   1   9  -2 75.7173 43.1843   8
   1  -9  -2 53.7195 54.2660  11
  -1  -9   2 62.5155 48.9876  11
   1   9  -2 203.766 60.4464   7
  -1   9   2 39.4488 48.3935   7
   1  -9  -2 180.866 68.3207   6
  -1   9   2 197.459 77.4314   5
  -1  -9   2 143.062 63.1549   6
   1   9  -2 116.609 62.5037   5
   1   9  -1 23476.7 560.303   8
  -1   9   1 23383.4 584.508   8
   1  -9  -1 23039.4 590.094  11
  -1  -9   1 23933.3 568.304  11
  -1  -9   1 24158.3 597.201   6
  -1   9   1 24219.2 570.405   7
   1   9  -1 24625.9 585.801   7
   1  -9  -1 23788.4 617.855   6
   1   9  -1 23278.4 631.862   5
  -1   9   1 23942.9 656.717   5
   1   9   0 21461.3 535.935   8
  -1   9   0 21137.3 545.354   8
  -1  -9   0 22672.1 548.423  11
   1  -9   0 22452.1 560.839  11
   1   9   0 22763.7 553.715   7
  -1   9   0 23399.5 544.292   7
  -1  -9   0 21476.9 562.641   6
   1  -9   0 21930.8 582.883   6
  -1   9   0 21692.4 615.069   5
   1   9   0 22643.5 608.530   5
   1  -9   1 5355.86 226.797   3
  -1  -9  -1 5657.25 226.801   3
   1  -9   1 5868.38 226.839  11
  -1  -9  -1 5671.76 223.151  11
   1   9   1 5966.84 220.923   8
  -1   9  -1 5316.32 213.784   8
   1  -9   1 6002.61 249.838   6
   1   9   1 5620.09 221.352   7
  -1  -9  -1 5800.50 237.060   6
  -1   9  -1 5911.07 217.325   7
   1   9   1 6186.69 266.565   5
  -1   9  -1 5385.93 261.023   5
   1  -9   2 18342.2 492.153   3
  -1  -9  -2 18115.3 488.879   3
   1  -9   2 18490.6 382.792   1
  -1  -9  -2 18614.6 488.792  11
   1  -9   2 18568.0 478.843  11
  -1   9  -2 17633.3 467.483   8
   1   9   2 18015.7 479.382   8
  -1   9  -2 19259.2 474.344   7
   1  -9   2 18873.1 512.321   6
   1   9   2 19086.4 486.261   7
  -1  -9  -2 18909.8 507.424   6
   1   9   2 18149.2 536.070   5
  -1   9  -2 18819.5 544.301   5
   1  -9   3 3602.36 179.353   3
  -1  -9  -3 3795.82 178.333   3
   1  -9   3 3619.96 100.883   1
  -1  -9  -3 3455.29 175.704  11
   1  -9   3 3680.40 168.019  11
   1   9   3 3475.87 172.039   8
  -1  -9  -3 3636.19 176.535   7
  -1   9  -3 3559.73 162.502   8
  -1  -9  -3 3489.14 185.193   6
   1   9   3 3510.26 169.881   7
  -1   9  -3 3602.88 166.235   7
   1  -9   3 3457.11 182.868   6
   1   9   3 3107.11 193.933   5
  -1   9  -3 3314.03 197.019   5
   1  -9   4 1123.25 102.400   3
  -1  -9  -4 1031.79 96.0758   3
   1  -9   4 1231.94 95.1081  11
  -1  -9  -4 978.321 99.5047  11
   1   9   4 1296.50 70.7402   1
   1  -9   4 1139.69 45.8652   1
   1   9   4 1249.72 102.838   8
  -1  -9  -4 1053.71 99.6504   7
  -1  -9  -4 1175.82 112.447   6
   1   9   4 1163.02 100.421   7
  -1   9  -4 1215.02 98.1978   7
   1  -9   4 1088.47 105.228   6
   1   9   4 1343.41 131.110   5
  -1  -9  -4 1268.02 103.859   5
  -1   9  -4 1205.69 120.080   5
   1  -9   5 9.63061 47.9660   3
  -1  -9  -5-4.71352 48.2748   3
   1  -9   5 30.1348 41.5901  11
   1   9   5 16.4888 56.6703   4
   1   9   5 50.2842 27.7524   1
   1  -9   5 6.51444 14.1134   1
   1   9   5 34.3754 49.2651   8
  -1  -9  -5 39.8460 45.5493   7
  -1   9  -5 16.5378 43.1942   7
   1   9   5-4.46752 47.2759   7
   1  -9   5-5.03126 52.5631   6
   1   9   5-7.07908 58.9973   5
  -1   9  -5 12.2052 53.8834   5
  -1  -9  -5 9.79960 44.8091   5
  -1  -9  -5 100.105 56.1832   6
  -1  -9  -6 5867.42 169.081   2
  -1  -9  -6 5946.56 233.405   3
   1   9   6 6039.25 187.421   1
   1  -9   6 5688.53 211.751  11
   1   9   6 6266.25 251.574   4
   1  -9   6 5502.17 227.704   3
   1   9   6 5873.38 242.365   8
  -1   9  -6 5879.68 224.648   7
  -1  -9  -6 6152.33 241.175   7
   1  -9   6 6371.80 246.904   6
  -1  -9  -6 6031.45 256.200   6
   1   9   6 5979.94 281.282   5
  -1  -9  -6 6056.17 245.027   5
  -1   9  -6 5812.75 256.983   5
   1  -9   7 2629.28 123.685   2
  -1  -9  -7 2630.79 150.276   3
   1   9   7 2488.10 117.128   1
   1  -9   7 2595.93 134.520  11
  -1   9  -7 2602.93 147.911  10
   1  -9   7 2416.61 143.582   3
   1   9   7 2843.29 164.169   4
   1   9   7 2786.17 164.939   8
  -1  -9  -7 2542.37 152.321   7
  -1  -9  -7 2833.30 173.683   6
  -1   9  -7 2981.28 154.020   7
   1   9   7 2816.24 191.949   5
  -1   9  -7 2413.64 161.151   5
  -1  -9  -7 2854.93 168.695   5
   1  -9   8 20198.7 487.386   2
  -1  -9  -8 21103.4 538.528   3
   1   9   8 20684.8 485.106   1
   1  -9   8 21606.5 509.931  11
  -1   9  -8 20472.4 530.825  10
   1   9   8 21496.1 549.626   4
   1  -9   8 20057.4 532.933   3
   1   9   8 20093.8 557.335   8
  -1   9  -8 22473.7 540.629   7
  -1  -9  -8 21000.1 550.567   7
  -1   9  -8 20310.1 565.970   5
  -1  -9  -8 21153.1 566.996   5
   1   9   8 21405.5 621.590   5
   1  -9   9 2397.82 121.804   2
  -1  -9  -9 2502.49 147.737   3
   1   9   9 2133.03 117.480   1
   1  -9   9 2603.03 129.877  11
  -1   9  -9 2332.33 140.579  10
  -1   9  -9 2421.86 89.2600   9
   1   9   9 2408.95 149.022   4
   1  -9   9 2381.89 143.197   3
  -1  -9  -9 2452.52 152.471   7
  -1   9  -9 2623.29 147.049   7
   1   9   9 2394.96 182.487   5
  -1  -9  -9 2134.14 152.314   5
  -1   9  -9 2235.47 154.219   5
  -1  -9 -10 10681.5 331.785   3
   1  -9  10 9908.64 290.601   2
   1   9  10 9877.25 292.230   1
   1  -9  10 10297.4 297.632  11
  -1   9 -10 9993.84 316.843  10
   1  -9  10 10062.6 323.321   3
   1   9  10 10384.1 328.800   4
  -1   9 -10 9497.04 226.868   9
  -1  -9 -10 9469.42 329.838   7
  -1   9 -10 11335.4 339.805   7
  -1   9 -10 10194.6 348.853   5
  -1  -9 -10 9828.03 354.622   5
   1   9  10 11006.8 411.883   5
   1  -9  11 4414.06 178.079   2
  -1  -9 -11 4648.47 154.278   2
  -1  -9 -11 4888.59 210.359   3
   1   9  11 4708.62 185.788   1
   1  -9  11 4887.95 186.239  11
  -1   9 -11 4362.36 193.834  10
   1   9  11 5006.41 208.280   4
   1  -9  11 4567.38 200.664   3
  -1   9 -11 4285.32 118.220   9
  -1   9 -11 5193.28 220.930   7
  -1  -9 -11 4710.56 216.147   7
  -1   9 -11 5161.68 231.664   5
   1   9  11 4883.29 265.267   5
  -1  -9 -11 4597.45 231.232   5
  -1  -9 -12 679.562 82.0642   3
  -1  -9 -12 684.728 57.9412   2
   1  -9  12 574.075 66.7828   2
   1   9  12 702.005 76.1942   1
   1  -9  12 624.601 70.2440  11
  -1   9 -12 650.071 79.8038  10
   1   9  12 670.334 80.6855   4
   1  -9  12 609.433 76.3049   3
   1   9  12 625.270 113.340   5
   1  -9  12 596.961 84.4590   8
  -1  -9 -12 594.593 87.3348   7
  -1   9 -12 610.168 84.7369   7
  -1   9 -12 614.533 90.6204   5
  -1  -9 -12 617.492 95.8454   5
   1  -9  13 852.494 80.9585   2
  -1  -9 -13 740.455 62.6714   2
  -1  -9 -13 746.337 87.6446   3
   1  -9  13 561.860 29.1252   1
   1  -9  13 560.155 27.3500   1
   1   9  13 793.439 80.0991   1
   1  -9  13 666.613 74.6917  11
  -1   9 -13 708.636 82.1304  10
   1  -9  13 702.652 82.9695   3
   1   9  13 728.944 120.214   5
   1   9  13 800.199 86.4563   4
   1  -9  13 781.134 91.3245   8
  -1  -9 -13 721.651 94.1838   7
  -1   9 -13 754.586 96.8264   7
  -1  -9 -13 636.641 101.283   5
  -1   9 -13 776.384 101.353   5
  -1  -9 -14 1317.97 109.954   3
  -1  -9 -14 1188.50 79.1203   2
   1  -9  14 1119.11 95.2301   2
   1  -9  14 1150.36 46.0084   1
   1  -9  14 1024.00 42.7265   1
   1   9  14 1131.09 96.2762   1
   1  -9  14 1262.66 98.1529  11
  -1   9 -14 1105.71 99.4535  10
   1   9  14 1129.44 98.6662   4
   1  -9  14 1105.36 99.4823   3
   1  -9  14 1342.12 113.756   8
  -1   9 -14 1174.92 119.771   7
  -1  -9 -14 1210.39 118.460   7
   1   9  14 1091.17 143.433   5
  -1  -9 -14 1234.23 131.902   5
  -1   9 -14 1234.40 120.194   5
  -1  -9 -15 9826.79 318.093   3
  -1  -9 -15 9534.17 259.113   2
   1  -9  15 9362.46 293.293   2
   1  -9  15 8297.56 197.487   1
   1   9  15 9423.10 302.002   1
   1  -9  15 8163.78 193.527   1
   1  -9  15 9588.26 291.870  11
  -1   9 -15 9074.55 291.524  10
   1   9  15 9755.66 293.374   4
   1  -9  15 9920.60 318.598   8
  -1  -9 -15 9153.06 332.936   7
  -1   9 -15 10531.1 346.198   7
  -1  -9 -15 9108.61 364.124   5
  -1   9 -15 9406.68 331.365   5
   1   9  15 10164.8 411.543   5
  -1  -9 -16 3048.83 133.226   2
  -1  -9 -16 3357.10 172.916   3
   1  -9  16 2853.89 154.194   2
   1   9  16 3080.50 164.911   1
   1  -9  16 2751.64 91.7053   1
   1  -9  16 3416.25 163.942  11
  -1   9 -16 2860.28 150.366  10
   1   9  16 3229.08 156.333   4
  -1   9 -16 3467.61 195.757   7
   1  -9  16 3110.18 170.593   8
   1   9  16 3157.32 198.662   6
  -1   9 -16 3012.29 182.057   5
  -1  -9 -16 3284.02 217.295   5
   1  -9  17 11528.2 345.316  11
  -1   9 -17 11687.7 395.919  11
   1   9  17 11036.3 325.692   4
   1  -9  17 11277.0 356.538   8
   1   9  17 10289.6 346.379   1
  -1  -9 -17 11428.3 355.015   3
  -1  -9 -17 11170.6 305.681   2
   1  -9  17 10822.8 340.746   2
  -1   9 -17 11484.9 379.404   5
   1  -9  18 3533.27 178.108  11
  -1   9 -18 3631.10 211.922  11
   1  -9  18 3589.38 185.720   8
   1   9  18 2886.87 170.711   1
   1  -9  18 3379.60 172.213   2
  -1  -9 -18 3374.28 146.840   2
  -1  -9 -18 3413.73 177.167   3
  -1   9 -18 3525.75 199.223   5
   1  -9  19 4887.12 219.583  11
  -1  -9 -19 5225.22 222.718   3
  -1   9 -19 5323.68 247.740   5
   1  -9  19 5333.41 228.963   8
  -1  -9 -20 610.182 89.3204   3
  -1  -9 -21 4106.03 195.240   3
  -1 -11  14 3230.72 152.134  11
  -1 -11  14 2918.72 145.497   2
  -1 -11  13 3872.91 164.307  11
  -1 -11  13 3704.96 162.009   2
  -1 -11  12 2764.77 136.331  11
  -1 -11  12 2789.92 135.844   2
  -1 -11  11 76.7035 47.1470  11
  -1  11  11 26.0505 58.5198   4
  -1 -11  11-19.8173 61.0152   6
  -1 -11  11 6.59044 39.2335   2
   1  11 -10 48.9272 58.2525  10
  -1 -11  10 17.2643 41.9248  11
  -1  11  10 48.9471 63.4429   4
  -1 -11  10-29.9736 60.9462   6
  -1 -11  10 40.6468 37.5980   2
  -1 -11   9 1211.65 90.5979  11
   1  11  -9 1137.43 109.755  10
  -1  11   9 1420.14 129.595   4
  -1 -11   9 1264.18 114.698   6
  -1 -11   9 1249.59 84.5525   2
  -1 -11   8 9209.78 257.380   2
   1 -11  -8 8447.77 339.428  11
  -1 -11   8 9558.67 279.787  11
   1  11  -8 8430.56 307.106  10
  -1  11   8 9843.37 352.124   8
   1 -11  -8 8971.76 322.265   7
   1 -11  -8 9264.88 341.623   5
  -1 -11   8 9310.30 315.982   6
  -1  11   8 9781.16 341.656   4
  -1  11   7 1473.81 137.166   4
  -1 -11   7 1505.36 100.718  11
   1 -11  -7 1291.93 133.598  11
   1 -11  -7 1292.01 118.501   7
  -1  11   7 1466.19 135.235   8
  -1 -11   7 1355.29 120.349   6
  -1 -11   7 1331.61 83.4018   2
   1 -11  -7 1462.77 86.5500   2
  -1 -11   6 8097.55 231.955   2
  -1  11   6 8547.58 327.208   4
  -1 -11   6 8444.93 264.537  11
   1 -11  -6 8252.95 323.163  11
  -1  11   6 8563.74 319.642   8
   1 -11  -6 8794.46 351.254   6
  -1 -11   6 8613.06 302.546   6
   1  11  -6 8648.32 340.161   5
  -1  11   6 8539.18 382.675   5
  -1 -11   5 1483.32 82.0189   2
  -1  11   5 1323.81 134.064   4
  -1  11   5 1463.47 129.400   8
  -1 -11   5 1686.99 108.445  11
   1 -11  -5 1553.80 136.714  11
   1 -11  -5 1500.92 145.341   6
  -1 -11   5 1623.77 125.085   6
  -1  11   5 1502.40 163.776   5
   1  11  -5 1345.63 139.107   5
  -1 -11   4 1997.26 94.3906   2
  -1 -11   4 2050.45 122.467  11
   1 -11  -4 2401.58 159.661  11
  -1  11   4 2486.36 158.912   8
  -1 -11   4 2159.90 144.911   6
   1 -11  -4 2449.64 176.024   6
  -1  11   4 2235.67 192.516   5
   1  11  -4 2191.47 170.956   5
  -1 -11   3 48.6775 31.0889   2
  -1  11   3 237.769 66.8235   8
   1 -11  -3 45.4338 58.5686  11
  -1 -11   3 39.7089 45.3617  11
  -1  11   3 67.2604 54.5773   7
  -1 -11   3 54.4586 59.0813   6
   1 -11  -3 81.4850 67.6500   6
   1  11  -3 50.7530 67.4298   5
  -1  11   3 113.232 84.8906   5
  -1 -11   2 5154.33 158.677   2
   1  11  -2 5602.44 216.923   8
  -1  11   2 5204.52 229.627   8
  -1 -11   2 5454.58 213.172  11
   1 -11  -2 5427.89 238.293  11
   1  11  -2 5774.13 236.437   7
  -1  11   2 5684.67 228.695   7
  -1 -11   2 5737.19 241.951   6
   1 -11  -2 5824.25 266.501   6
  -1  11   2 5093.08 280.924   5
   1  11  -2 5595.41 274.445   5
  -1 -11   1 1914.19 85.0378   2
   1  11  -1 2060.58 129.243   8
  -1  11   1 1852.12 134.224   8
   1 -11  -1 2002.72 140.813  11
  -1 -11   1 2013.37 129.675  11
  -1 -11   1 2207.45 151.623   6
   1  11  -1 2124.88 137.965   7
   1 -11  -1 1968.40 156.044   6
  -1  11   1 2163.78 135.138   7
  -1  11   1 1902.30 177.702   5
   1  11  -1 1811.71 162.534   5
  -1 -11   0 8238.87 216.234   2
  -1 -11   0 8790.16 294.673  11
   1 -11   0 8966.11 307.500  11
  -1 -11   0 8928.93 320.886   6
   1 -11   0 9026.39 337.478   6
  -1  11   0 8794.30 294.732   7
   1  11   0 9319.62 310.789   7
   1  11   0 8835.66 357.599   5
  -1  11   0 8208.78 361.645   5
  -1  11   0 8882.06 304.169   8
   1  11   0 8548.16 289.503   8
  -1 -11  -1 7781.80 280.361  11
   1 -11   1 8174.54 289.693  11
  -1  11  -1 8579.22 287.550   7
   1 -11   1 8136.56 318.202   6
  -1 -11  -1 8430.81 311.671   6
   1  11   1 7906.67 342.222   5
  -1  11  -1 7695.35 347.304   5
   1  11   1 8236.75 285.267   8
  -1  11  -1 7944.39 281.576   8
   1 -11   2 3707.14 183.130  11
  -1 -11  -2 3493.24 180.998  11
  -1  11  -2 3721.57 180.763   8
   1  11   2 3548.28 181.998   8
  -1  11  -2 4149.60 186.052   7
   1 -11   2 3603.48 203.561   6
  -1 -11  -2 3701.72 202.895   6
  -1  11  -2 3927.38 240.364   5
   1  11   2 3536.90 228.187   5
   1  11   3 5888.88 275.114   4
  -1 -11  -3 5534.03 235.090  11
   1 -11   3 5536.21 223.254  11
   1  11   3 5507.18 234.691   8
  -1 -11  -3 5570.91 252.555   6
  -1  11  -3 6062.46 232.401   7
   1 -11   3 5355.87 251.659   6
  -1  11  -3 5144.51 272.416   5
   1  11   3 5531.34 283.103   5
  -1 -11  -4 25.4254 25.3725   2
   1  11   4-13.9108 73.6037   4
   1 -11   4 30.7593 49.0796  11
  -1 -11  -4 5.35386 57.0145  11
   1  11   4 178.494 62.1041   8
  -1  11  -4 33.2956 46.7011   7
   1 -11   4 6.05235 59.4224   6
  -1  11  -4 7.69633 69.7854   5
   1  11   4 24.7492 77.9604   5
  -1 -11  -4 44.2155 63.8134   6
   1 -11   5 69.4585 38.2396   2
   1 -11   5 90.0033 52.5489  11
  -1 -11  -5 78.3090 56.9114  11
   1  11   5 60.6408 62.6648   4
   1  11   5 118.378 60.0398   8
  -1  11  -5 96.2755 53.4703   7
  -1 -11  -5 52.2441 64.1260   6
   1 -11   5 42.4173 64.1343   6
  -1  11  -5-15.2740 78.2247   5
   1  11   5 50.8336 82.5730   5
   1 -11   6 1051.58 78.6413   2
   1 -11   6 1209.05 99.7550  11
  -1 -11  -6 1187.77 118.886  11
  -1  11  -6 1136.03 113.763  10
   1  11   6 1536.11 138.433   4
   1  11   6 1311.77 119.574   8
  -1  11  -6 1236.49 107.997   7
   1 -11   6 1087.33 115.369   6
   1  11   6 1118.50 146.066   5
  -1  11  -6 1159.61 137.602   5
   1 -11   7 2209.87 114.226   2
  -1 -11  -7 2214.23 159.411  11
   1 -11   7 2247.09 131.630  11
  -1  11  -7 2085.17 146.471  10
   1  11   7 2184.20 162.127   4
   1  11   7 2233.30 159.640   8
   1 -11   7 2276.65 159.964   6
  -1  11  -7 2517.34 149.604   7
   1  11   7 2425.95 195.429   5
  -1  11  -7 1914.92 166.279   5
   1 -11   8 2386.28 122.972   2
   1 -11   8 2802.61 141.894  11
  -1 -11  -8 2579.54 173.037  11
  -1  11  -8 2359.63 155.207  10
   1  11   8 2788.38 178.693   4
   1  11   8 2774.98 177.393   8
   1 -11   8 2482.02 163.804   6
  -1  11  -8 2349.02 183.105   5
   1  11   8 2417.09 204.574   5
  -1 -11  -8 2583.89 168.041   5
   1 -11   9 6097.36 213.971   2
   1 -11   9 6782.16 233.122  11
  -1  11  -9 6357.94 257.979  10
   1  11   9 6477.39 270.692   4
   1  11   9 6256.01 275.959   8
   1 -11   9 6505.73 268.513   6
  -1  11  -9 5988.01 287.691   5
  -1 -11  -9 6259.92 271.692   5
  -1  11 -10 4850.43 222.656  10
   1 -11  10 4970.93 198.100  11
   1  11  10 5096.51 234.146   4
   1 -11  10 4745.98 227.453   6
   1 -11  10 4906.01 188.920   2
  -1  11 -11 553.826 88.7049  10
   1 -11  11 686.453 81.3977  11
   1 -11  11 615.304 94.8431   6
   1 -11  11 522.180 71.2501   2
   1  11  11 651.877 97.1795   4
   1 -11  12 2788.19 142.556   2
   1 -11  12 2854.77 150.134  11
   1  11  12 2777.84 167.468   4
   1 -11  13 1801.39 120.361  11
   1 -11  13 1730.58 116.318   2
   1 -11  14 213.050 59.5976   2
  -2   0  31 52.0168 50.9096   9
  -2   0  30 3661.37 159.744   9
  -2   0  29 88.7006 55.4164   9
  -2   0  29 89.4018 55.2508  10
   2   0 -29 85.8615 51.4897   3
  -2   0  28 4743.31 183.073   9
   2   0 -28 5142.28 188.284   3
  -2   0  28 4960.94 184.679  10
  -2   0  27-36.0401 73.8224   6
   2   0 -27-9.80890 91.2096   5
  -2   0  27 20.0961 45.8153  10
  -2   0  27-3.34852 43.1231   9
   2   0 -27 40.6577 36.3054   3
  -2   0  27 53.3073 60.2509   1
  -2   0  26 8491.66 312.817   2
  -2   0  26 9064.27 328.672   1
   2   0 -26 9819.50 331.890  11
  -2   0  26 9517.06 273.267  10
   2   0 -26 8332.72 273.802   4
  -2   0  26 9409.18 273.524   9
  -2   0  26 9507.65 357.515   6
   2   0 -26 9438.65 405.129   5
  -2   0  25 5.52949 52.2531   1
   2   0 -25-21.6265 57.2133  11
  -2   0  25 77.6990 43.0942  10
   2   0 -25-22.3016 45.5612   4
  -2   0  25 29.4715 38.3978   9
  -2   0  25-15.5680 50.9476   2
  -2   0  25 6.74550 60.6327   6
   2   0 -25 100.944 75.6945   5
  -2   0  24 175.971 61.6641   1
   2   0 -24 199.034 63.7020  11
  -2   0  24 226.811 52.6935  10
   2   0 -24 175.672 50.9986   4
  -2   0  24 230.323 50.3752   9
  -2   0  24 184.283 58.5193   2
  -2   0  24 286.319 75.2045   6
   2   0 -24 193.505 80.5213   5
  -2   0  23 56.1382 53.3549   1
  -2   0  23 12.5561 45.0472  10
   2   0 -23 253.079 68.5033  11
  -2   0  23 174.579 51.4684   9
  -2   0  23 186.137 58.2605   2
   2   0 -23 75.5217 75.4526   5
  -2   0  23 112.369 58.5570   6
  -2   0  22 54497.5 1146.26   1
  -2   0  22 54024.0 1080.89  10
   2   0 -22 54547.8 1149.15  11
  -2   0  22 52900.4 1075.05   9
  -2   0  22 51477.8 1127.34   2
   2   0 -22 51060.5 1234.63   5
  -2   0  21 112.814 53.4261   1
  -2   0  21 90.1674 46.7020  10
  -2   0  21 94.8173 47.3745   9
   2   0 -21 191.247 61.0783  11
  -2   0  21 152.209 55.5618   2
   2   0 -21 52.4432 79.3061   5
  -2   0  20 40187.4 891.449   1
  -2   0  20 40503.9 835.769   9
   2   0 -20 41409.8 898.116  11
  -2   0  20 39221.3 876.560   2
   2   0 -20 39684.6 974.033   5
  -2   0  19 4.24633 39.8086   1
  -2   0  19 2.82068 36.4809   9
   2   0 -19 39.4561 41.0994  11
  -2   0  19 51.0643 37.7052   2
   2   0 -19-13.4500 55.4718   5
  -2   0  18 14962.3 402.235   1
   2   0 -18 15146.1 407.924  11
  -2   0  18 14862.2 363.105   9
   2   0 -18 13701.4 387.278   2
  -2   0  18 14675.0 391.261   2
   2   0 -18 15013.1 464.847   5
   2   0 -17-3.62627 27.9795   2
  -2   0  17 11.3696 28.1780   1
  -2   0  17 16.0981 27.2922  10
   2   0 -17-8.08027 36.9467  11
  -2   0  17 13.2042 23.1044   9
  -2   0  17 3.48829 28.1673   2
   2   0 -17-12.0343 39.8866   5
  -2   0  16 18409.8 454.572   1
  -2   0  16 18282.3 421.730  10
   2   0 -16 18349.6 462.940  11
   2   0 -16 18717.3 450.191   2
  -2   0  16 17366.3 439.462   2
   2   0 -16 17596.4 506.473   5
  -2   0  15 7.40784 25.6310  10
   2   0 -15 14.5695 33.0273  11
   2   0 -15 31.4432 43.2276   5
  -2   0  15 26.7402 28.9730   1
   2   0 -15 35.0972 27.3946   2
  -2   0  15 6.16282 25.1529   2
   2   0 -14 84166.5 1739.10   5
  -2   0  14 89798.4 1648.11  10
  -2   0  14 81606.5 1670.01   1
  -2   0  14 87939.9 1669.34   2
  -2   0  13 34.8320 22.1060   2
   2   0 -13 40.3343 36.1910   5
  -2   0  13 13.3594 22.0250  10
  -2   0  12 31664.4 634.038  10
   2   0 -12 30624.1 700.672   5
  -2   0  12 29416.0 641.412   2
   2   0 -11 14.9215 24.7323   5
  -2   0  11 23.3390 16.5430  10
  -2   0  11 36.4498 18.7968   2
   2   0 -10 84.0459 31.2798   5
  -2   0  10 50.1614 18.9894  10
  -2   0  10 64.4562 19.8343   2
   2   0  -9-3.00367 22.0448   5
   2   0  -9 16.6205 16.7766   1
  -2   0   9 11.2809 14.6792   2
  -2   0   9 4.85392 15.0457  10
   2   0  -8 300299. 5422.64   5
  -2   0   8 295617. 5382.93   2
   2   0  -8 292761. 5389.50   1
   2   0  -7 50.0870 27.7852   5
  -2   0   7 52.2411 17.6977   2
   2   0  -7 28.3752 18.4443   1
   2   0  -6 425738. 7632.24   5
  -2   0   6 419688. 7605.57   2
   2   0  -6 417143. 7612.57   1
   2   0  -5 24.0039 16.2850   5
  -2   0   5 43.9350 12.7326   2
   2   0  -5 11.0609 12.3381   1
   2   0  -4 429.795 28.6982   1
   2   0  -4 500.498 33.5650   5
  -2   0   3 6.80640 7.06794   9
   2   0  -3 9.13987 9.59359   6
   2   0  -3 16.0464 9.33748   5
   2   0  -3 21.4226 9.20492   1
   2   0  -2 199.109 13.1485   4
  -2   0   2 185.421 14.1266   9
   2   0  -2 204.392 15.5383   6
   2   0  -1 5.75608 4.86149  10
   2   0  -1 8.76769 5.40221   4
  -2   0   1 14.1204 4.96642   9
   2   0  -1 10.3997 4.80066   5
   2   0   0 19639.8 368.916   8
  -2   0   0 20283.1 378.939   4
   2   0   0 19234.1 368.413  11
  -2   0   0 19172.0 375.695  10
  -2   0   0 19920.8 371.752   9
  -2   0  -1 13.6843 7.44441   4
   2   0   1 34.2396 6.49539  11
  -2   0  -2 40250.4 748.505  10
   2   0   2 38822.0 732.028  11
  -2   0  -3 8.71721 13.5897  10
   2   0   3 10.9079 9.42598  11
  -2   0  -4 176186. 3150.53  10
   2   0   4 168813. 3131.93  11
  -2   0  -5 64.9821 18.5295  10
   2   0   5 27.8305 13.3409  11
   2   0   6 1861.95 69.1154   2
   2   0   6 1773.68 76.1606  11
  -2   0  -7 20.7907 21.6670  10
   2   0   7 46.3326 13.9152   2
   2   0   8 89107.7 1691.86   2
  -2   0  -8 92536.5 1731.17  10
  -2   0  -9 86.1350 31.5161   5
   2   0   9 33.8978 16.0279   2
   2   0   9 26.0897 20.3943  10
  -2   0  -9 48.6473 26.1790  10
  -2   0 -10 113561. 2317.69   5
  -2   0 -10 117502. 2291.74  10
   2   0  10 121159. 2252.84   2
   2   0  11-4.58984 17.0644   2
  -2   0 -11-6.82870 28.7448  10
   2   0  11 42.4670 25.0613  10
  -2   0 -12 201769. 3860.50   5
   2   0  12 197452. 3770.39   2
   2   0  13-5.43099 23.3133   2
  -2   0 -13 5.06373 33.5663   5
   2   0  14 12873.1 337.371   2
  -2   0 -14 13694.5 411.901   5
  -2   0 -14 13204.9 345.292  11
  -2   0 -15 17.7260 35.1740   5
  -2   0 -15 3.29888 25.1495  11
   2   0  15 18.7920 29.1242   2
  -2   0 -16 46890.9 1078.31   5
  -2   0 -16 48075.2 983.605  11
   2   0  16 45625.8 973.219   2
   2   0  16 47816.6 970.618  10
   2   0  17 55.9034 37.7606  10
  -2   0 -17 59.0155 41.6644  11
  -2   0 -17 61.6953 54.1396   5
  -2   0 -17 28.4100 21.5923   3
   2   0  17 3.55591 32.2473   2
   2   0  18 53891.7 1071.93  10
  -2   0 -18 53065.3 1088.21  11
  -2   0 -18 52248.9 1001.26   3
  -2   0 -18 53101.9 1204.67   5
   2   0  18 51973.0 1083.37   2
   2   0  19 20.9267 42.9578  10
  -2   0 -19 40.7563 43.9442  11
  -2   0 -19-15.3695 59.9986   5
  -2   0 -19 59.5057 26.3996   3
   2   0  19 35.9717 40.9394   2
   2   0  19 22.9696 39.8228   1
   2   0  20 114.834 47.2730  10
  -2   0 -20 156.899 47.4422  11
  -2   0 -20 243.027 77.8077   5
  -2   0 -20 150.725 28.8760   3
   2   0  20 150.818 46.3386   2
   2   0  20 189.758 56.2324   1
  -2   0 -21 8.46492 57.8939   5
  -2   0 -21-12.8989 42.5217   4
  -2   0 -21 17.5621 39.1167  11
   2   0  21-4.39419 40.1844   2
   2   0  21 5.09416 48.1388   1
   2   0  21-18.4225 41.3834  10
   2   0  22 2416.53 150.895   1
   2   0  22 2984.35 141.650  10
  -2   0 -22 2812.39 151.986  11
  -2   0 -22 2388.73 139.516   4
   2   0  22 2545.68 145.776   2
  -2   0 -22 2268.56 187.092   5
  -2   0 -23-9.28268 59.5162   5
  -2   0 -23 112.623 48.7071   4
  -2   0 -23 33.6346 45.7666  11
   2   0  23-5.58365 51.9217   1
   2   0  23-24.1772 41.1146   2
   2   0  23 42.3533 41.2583  10
   2   0  24 7927.86 302.138   1
   2   0  24 8246.24 267.072  10
  -2   0 -24 8124.31 288.167  11
  -2   0 -24 7911.79 281.174   4
   2   0  24 7813.21 285.723   2
  -2   0 -24 7974.57 373.217   5
  -2   0 -25 93.4166 64.8275  11
   2   0  25 113.388 63.0709  10
  -2   0 -25 110.408 65.4754   4
  -2   0 -25 141.491 88.4371   5
   2   0  25 66.1905 61.6520   1
  -2   0 -25 98.6783 38.0532   3
   2   0  25 83.9719 58.6411   2
  -2   0 -26 23491.5 750.113   5
   2   0  26 25105.0 588.630  10
  -2   0 -26 23741.7 518.417   3
  -2   0 -26 23373.7 609.487   4
   2   0  26 25610.9 562.649   9
   2   0  26 25531.8 654.461   1
   2   0  26 22966.6 616.947   2
   2   0  27 69.2293 50.1331   9
  -2   0 -27 159.389 72.1377   4
  -2   0 -27 68.8034 39.0301   3
   2   0  27 100.848 58.1471  10
   2   0  28 4423.18 172.014   9
   2   0  28 4798.38 198.098  10
   2   0  29 3.27406 49.4605   9
   2   0  29-34.2662 55.6296  10
   2   0  30 351.635 59.9675   9
   2   0  30 401.676 72.8935  10
  -2  -2  29 67.7682 48.7849   9
  -2   2  29 52.1243 64.0872  10
   2   2 -29 77.0795 56.3386   3
  -2   2  28 9906.47 325.315  10
  -2  -2  28 9979.89 263.646  10
   2   2 -28 10297.8 306.309   3
  -2  -2  28 9560.62 263.712   9
  -2   2  28 9574.42 309.743   9
  -2  -2  28 9870.71 341.675   1
   2   2 -28 9679.05 420.505   5
   2   2 -27 28.1604 88.7041   5
  -2  -2  27 32.2148 41.4106  10
  -2   2  27 24.3628 64.8589  10
  -2   2  27 4.34261 61.1750   9
  -2  -2  27 33.0030 40.2127   9
   2   2 -27 15.6171 45.0682   3
  -2  -2  27-16.4285 61.1615   1
  -2   2  26 7560.99 307.906   1
  -2  -2  26 8154.72 295.830   1
   2   2 -26 8365.18 291.406  11
  -2  -2  26 8511.74 230.075  10
  -2   2  26 8048.47 286.664  10
   2   2 -26 8316.56 262.734   3
  -2  -2  26 7998.60 227.966   9
  -2   2  26 8359.94 341.011   6
   2  -2 -26 7682.04 373.894   5
   2   2 -26 8047.26 366.993   5
   2  -2 -25 2099.59 142.012   2
  -2  -2  25 2036.37 137.730   1
   2   2 -25 2253.73 141.537  11
   2  -2 -25 2255.08 161.674  11
  -2  -2  25 2177.72 102.005  10
  -2   2  25 2217.23 141.569  10
   2   2 -25 2339.31 124.872   3
   2  -2 -25 2159.86 87.5184   4
  -2  -2  25 2111.25 100.128   9
  -2   2  25 1975.63 158.877   6
   2   2 -25 2160.41 184.403   5
   2  -2 -25 2358.15 199.080   5
   2  -2 -24 22671.9 557.344   2
  -2  -2  24 21118.7 540.763   1
   2  -2 -24 21874.0 588.292  11
   2   2 -24 21249.0 531.766  11
  -2   2  24 22179.5 546.475  10
   2   2 -24 22317.2 506.683   3
   2  -2 -24 18102.7 429.058   4
  -2  -2  24 20636.2 458.103   9
  -2   2  24 20207.0 588.014   6
   2  -2 -24 20210.4 645.718   5
   2   2 -24 20743.7 628.231   5
  -2  -2  23 122.136 53.6848   1
   2  -2 -23 143.222 61.9835   2
   2   2 -23 186.553 59.1610  11
   2  -2 -23 148.488 72.9502  11
  -2   2  23 124.774 59.4139  10
   2  -2 -23 97.1758 33.8733   4
   2   2 -23 15.8944 63.5055   5
  -2  -2  23 126.575 41.3347   9
   2  -2 -23 97.4275 82.3850   5
  -2   2  23 99.5548 67.5454   6
   2   2 -23 132.726 45.2206   3
   2  -2 -22 15761.8 435.962   2
  -2  -2  22 15774.0 431.886   1
   2  -2 -22 15979.4 472.418  11
   2   2 -22 15652.8 422.834  11
  -2   2  22 15599.1 436.150  10
   2   2 -22 16555.4 400.584   3
   2  -2 -22 14055.5 337.207   4
  -2  -2  22 15968.0 362.365   9
  -2   2  22 15619.7 478.332   6
   2  -2 -22 15145.3 520.937   5
   2   2 -22 15962.7 508.221   5
   2  -2 -21 2420.62 140.788   2
   2   2 -21 2497.12 143.455   2
  -2  -2  21 2344.50 135.749   1
   2   2 -21 2364.06 132.495  11
  -2   2  21 2470.79 148.935  10
   2  -2 -21 2149.80 88.6475   4
   2   2 -21 2450.77 120.789   3
  -2  -2  21 2334.38 101.193   9
  -2   2  21 2224.74 158.850   6
   2  -2 -21 2584.49 190.940   5
   2   2 -21 2173.56 163.784   5
   2   2 -20 9594.87 304.467   2
   2  -2 -20 10222.4 308.227   2
  -2  -2  20 9590.18 296.426   1
   2   2 -20 9240.41 289.475  11
  -2  -2  20 9735.43 241.347  10
  -2   2  20 9536.62 310.620  10
   2   2 -20 10115.3 276.787   3
   2  -2 -20 8645.38 224.287   4
  -2  -2  20 9215.05 239.746   9
  -2   2  20 9427.73 336.211   6
   2  -2 -20 9725.32 379.331   5
   2   2 -20 9080.14 354.457   5
  -2  -2  19 4564.52 185.267   1
   2   2 -19 4238.56 176.322  11
  -2  -2  19 4614.70 142.376  10
  -2   2  19 4967.78 204.640  10
   2  -2 -19 4341.13 130.039   4
   2   2 -19 4861.52 169.091   3
  -2  -2  19 4301.65 140.574   9
   2  -2 -19 4802.53 192.151   2
   2   2 -19 4373.16 186.591   2
   2  -2 -19 4410.88 239.744   5
   2   2 -19 4363.58 225.559   5
  -2  -2  18 4171.17 170.950   1
  -2   2  18 4405.17 191.118  10
   2   2 -18 4122.55 166.863  11
  -2  -2  18 4431.89 132.748  10
   2   2 -18 4176.66 154.298   3
   2  -2 -18 3730.96 117.312   4
   2   2 -18 4021.65 206.230   5
  -2  -2  18 4151.84 132.448   9
   2  -2 -18 4593.37 181.312   2
   2   2 -18 4263.99 177.424   2
   2  -2 -18 4001.17 221.003   5
  -2   2  17 100.000 40.4452   1
  -2  -2  17 218.925 42.6556   1
   2  -2 -17 121.257 38.5391   2
   2   2 -17 186.924 41.7660   2
   2   2 -17 172.783 40.4800  11
  -2  -2  17 186.091 30.6698  10
  -2   2  17 242.341 55.1248  10
   2  -2 -17 287.629 29.2797   4
   2   2 -17 192.858 55.7930   5
  -2  -2  17 204.676 30.7205   9
   2   2 -17 156.226 34.8549   3
   2  -2 -17 138.754 52.8802   5
  -2   2  16 11411.3 338.060   1
  -2  -2  16 12290.2 325.145   1
   2   2 -16 11806.8 317.009  11
  -2  -2  16 12499.7 274.647  10
   2  -2 -16 11470.6 259.729   4
   2   2 -16 11884.5 374.460   5
   2   2 -16 12748.5 309.820   3
  -2  -2  16 11535.1 274.764   9
   2   2 -16 12151.4 331.023   2
   2  -2 -16 11911.5 330.088   2
   2  -2 -16 11651.0 396.841   5
  -2   2  15 3608.83 158.505   1
  -2  -2  15 3645.49 145.395   1
   2   2 -15 3602.71 141.823  11
  -2  -2  15 3795.63 113.568  10
   2   2 -15 3681.83 178.894   5
   2  -2 -15 3459.30 102.783   4
   2   2 -15 3652.11 136.598   3
  -2  -2  15 3620.21 115.567   9
   2   2 -15 3689.03 149.903   2
   2  -2 -15 3646.95 150.273   2
   2  -2 -15 3518.84 193.007   5
  -2  -2  14 33473.5 693.991   1
  -2   2  14 32331.3 718.224   1
   2   2 -14 31775.8 686.232  11
  -2  -2  14 33751.3 641.095  10
   2   2 -14 32124.0 743.962   5
   2  -2 -14 31427.4 626.399   4
  -2  -2  14 33064.3 646.896   9
   2  -2 -14 33514.5 705.205   2
   2   2 -14 33096.5 702.840   2
   2  -2 -14 31884.7 782.497   5
   2   2 -13 19.4784 28.3149   2
  -2  -2  13 22.9418 25.7620   1
  -2   2  13 72.5953 33.1111   1
   2   2 -13 104.155 33.5147  11
  -2  -2  13 36.4787 19.4364  10
   2  -2 -13 14.8020 14.2098   4
   2   2 -13 32.0278 37.8392   5
  -2  -2  13 43.9753 20.2799   9
   2  -2 -13 15.4350 38.2603   5
  -2  -2  12 52208.5 1024.68   1
  -2   2  12 51377.7 1053.40   1
   2   2 -12 52636.7 1021.18  11
  -2  -2  12 52964.7 975.774  10
   2  -2 -12 49380.6 962.126   4
   2   2 -12 52502.2 1073.27   5
  -2  -2  12 53422.5 985.517   9
   2   2 -12 52307.3 1034.01   2
   2  -2 -12 52305.5 1114.70   5
  -2   2  11 16401.4 398.670   1
  -2  -2  11 17284.1 375.619   1
   2   2 -11 15528.3 346.758  10
   2   2 -11 16104.1 368.203  11
  -2  -2  11 16921.7 333.166  10
   2   2 -11 17056.9 372.786   3
   2   2 -11 16714.4 409.300   5
   2  -2 -11 16071.0 322.436   4
  -2  -2  11 16227.7 342.219   9
   2  -2 -11 16078.2 441.484   5
   2   2 -11 16519.4 381.349   2
   2   2 -10 3101.03 116.444   2
  -2  -2  10 3273.82 112.396   1
  -2   2  10 3046.91 126.938   1
   2   2 -10 3071.79 108.188  11
   2   2 -10 3099.68 94.4598  10
  -2  -2  10 3318.37 86.8570  10
   2   2 -10 3346.00 132.986   5
   2   2 -10 3328.82 113.448   3
  -2  -2  10 3131.59 93.9440   9
   2  -2 -10 3147.87 152.253   5
   2   2  -9 38035.3 760.869   2
   2   2  -9 37796.5 745.909  11
   2   2  -9 37585.6 720.974  10
  -2  -2   9 38022.7 712.903  10
  -2   2   9 37606.2 778.079   1
  -2  -2   9 39552.8 750.166   1
  -2  -2   9 38191.0 728.734   9
   2   2  -9 37935.6 737.764   9
  -2   2   9 36976.8 796.046   6
   2  -2  -9 37912.2 820.401   5
   2   2  -8 17011.2 370.800   2
  -2   2   8 16945.1 389.260   1
  -2  -2   8 17404.1 359.484   1
   2   2  -8 17046.4 357.677  11
   2   2  -8 17143.5 335.562  10
   2   2  -8 16319.5 350.517   9
  -2  -2   8 16969.1 347.710   9
  -2   2   8 16858.6 404.256   6
   2  -2  -8 16999.3 423.555   5
   2   2  -7 72148.6 1385.40   2
  -2  -2   7 74931.4 1373.21   1
  -2   2   7 73430.6 1407.18   1
   2   2  -7 71270.8 1370.62  11
  -2  -2   7 75260.9 1379.96  11
  -2  -2   7 72683.3 1367.53   9
   2   2  -7 74171.6 1350.93  10
  -2   2   7 74412.9 1344.46   4
   2   2  -7 73740.5 1368.57   9
  -2   2   7 73572.1 1427.80   6
   2  -2  -7 74038.6 1445.38   5
   2   2  -6 122905. 2266.32   2
  -2  -2   6 124631. 2251.00   1
  -2   2   6 124433. 2285.78   1
  -2  -2   6 124978. 2256.42  11
   2   2  -6 119011. 2251.11  11
  -2  -2   6 120958. 2253.59   9
   2   2  -6 120766. 2236.12  10
  -2   2   6 125032. 2234.34   4
   2   2  -6 124055. 2252.49   9
  -2   2   6 125479. 2306.89   6
   2  -2  -6 125693. 2323.11   5
   2   2  -5 11327.4 247.102   2
  -2   2   5 11816.5 265.867   1
  -2  -2   5 11480.8 234.632   1
  -2  -2   5 11185.9 236.713  11
   2   2  -5 11175.8 238.029  11
   2   2  -5 11562.9 241.780   9
  -2   2   5 11916.7 282.631   6
   2  -2  -5 12095.0 293.668   5
  -2  -2   4 227348. 4329.57   2
   2   2  -4 237084. 4330.83   2
  -2   2   4 246098. 4353.43   1
  -2  -2   4 244928. 4314.60   1
   2   2  -4 227890. 4322.32  11
  -2  -2   4 242354. 4319.32  11
   2   2  -4 246428. 4332.11   9
  -2  -2   4 233309. 4342.84   3
  -2   2   4 247183. 4373.60   6
   2  -2  -4 244302. 4383.28   5
   2   2  -3 11730.9 237.137   2
  -2  -2   3 11358.9 236.402   2
  -2  -2   3 11525.2 228.354  11
   2   2  -3 11566.6 235.303  11
  -2  -2   3 11450.9 253.372   3
  -2   2   3 11468.4 255.634   1
  -2  -2   3 12079.5 232.532   8
  -2   2   3 12201.8 273.041   6
   2  -2  -3 11646.9 247.435   7
   2  -2  -3 12085.5 281.222   5
  -2  -2   2 3939.16 90.4135   2
  -2  -2   2 3987.85 89.7029  11
  -2  -2   2 3986.33 108.558   3
  -2  -2   2 4071.43 91.8741   8
   2   2  -2 4050.64 89.4793   8
   2   2  -2 3865.51 93.5027   5
   2  -2  -2 4140.76 125.034   5
   2  -2  -2 3969.59 101.190   7
  -2   2   1 5421.34 131.498   1
  -2   2   1 5412.80 145.670   8
   2   2  -1 5472.12 120.300   8
  -2  -2   1 5177.67 139.112   7
   2  -2  -1 5510.12 149.017   5
  -2  -2   1 5538.61 120.600   5
   2   2  -1 5888.89 127.469   5
  -2  -2   1 5555.21 122.111   6
   2  -2  -1 5313.38 124.931   7
   2   2  -1 5437.15 136.984   3
   2   2   0 195295. 3366.95   3
   2  -2   0 180792. 3348.96   7
  -2   2   0 191314. 3377.52   8
   2  -2   0 181312. 3380.35  11
  -2  -2   0 190404. 3373.79   7
  -2  -2   0 176781. 3351.31   6
   2   2   0 191313. 3353.52   6
   2   2   0 186175. 3359.41   5
  -2  -2   0 177482. 3355.02   5
   2   2   1 3218.53 90.1873   3
   2  -2   1 3017.50 90.2497   3
  -2   2  -1 2973.47 94.1007   8
   2   2   1 3170.74 88.7891   6
  -2  -2  -1 3122.20 94.8112   7
   2   2   1 3037.38 92.8804   5
   2   2   2 544602. 9697.29   3
   2  -2   2 540370. 9702.99   3
  -2   2  -2 526467. 9715.57  11
  -2   2  -2 518961. 9710.20  10
  -2   2  -2 557432. 9710.68   8
   2   2   2 506094. 9706.88   6
  -2  -2  -2 568692. 9715.28   7
   2   2   2 538742. 9717.01   5
  -2  -2  -3 5796.81 125.173   2
   2   2   3 5912.81 127.159   2
   2  -2   3 6165.18 149.901   3
  -2   2  -3 6537.68 160.551  10
  -2   2  -3 5547.50 154.498  11
  -2  -2  -3 6241.24 160.228   4
  -2  -2  -3 5953.93 154.523   7
   2   2   3 5977.02 158.746   6
   2   2   3 6039.37 167.091   5
   2   2   4 32582.6 622.506   2
  -2  -2  -4 31898.4 620.086   2
   2  -2   4 33939.6 642.129   3
  -2  -2  -4 33046.3 629.636   3
  -2   2  -4 33093.9 653.561  10
  -2   2  -4 32987.8 652.594  11
  -2  -2  -4 33069.7 654.218   4
   2   2   4 34178.6 666.812   6
  -2  -2  -4 33949.4 654.399   7
   2   2   4 33360.7 676.200   5
  -2   2  -5 406.233 33.7908  11
  -2  -2  -5 473.946 36.7244   4
   2   2   5 401.830 34.5620   4
   2   2   5 450.149 44.0825   5
  -2   2  -5 511.808 39.5131  10
  -2  -2  -5 487.122 38.2654   7
   2  -2   5 583.479 34.6214   3
  -2  -2  -5 487.493 27.7549   2
  -2  -2  -5 462.608 27.4926   3
   2   2   5 476.539 28.3461   2
  -2   2  -5 453.738 31.4160   3
   2  -2   6 403.311 30.2500   3
   2   2   6 443.011 46.8378   5
   2   2   6 472.915 37.9655   4
  -2  -2  -6 475.269 37.8358   4
   2  -2   6 443.790 37.5586  10
  -2   2  -6 495.810 40.4528  10
  -2  -2  -6 521.627 41.5659   7
  -2   2  -6 439.151 32.7073   3
   2   2   6 444.921 30.1762   2
  -2  -2  -6 607.935 33.4587   2
   2  -2   7 19.5222 18.8029  10
  -2   2  -7 15.5999 16.1109  10
   2   2   7 50.3284 14.6936   2
   2  -2   7 70.6085 15.2121   3
  -2   2  -7 20.2787 12.9093   3
   2   2   7 12.0447 19.9817   5
   2   2   7 24.6588 17.6936   4
  -2  -2  -7 33.5442 18.3473   4
  -2   2  -8 57636.5 1100.41  10
   2  -2   8 56149.3 1063.78   3
   2   2   8 58963.5 1094.83   4
  -2  -2  -8 59478.2 1092.88   4
   2   2   8 56305.1 1142.98   5
  -2   2  -8 57889.2 1072.31   3
   2   2   8 56843.2 1078.30   2
  -2  -2  -8 57379.9 1075.71   2
  -2   2  -8 56945.1 1091.78  11
  -2   2  -9 268.178 33.9594  11
   2  -2   9 221.276 31.0534  10
  -2   2  -9 187.655 34.1612  10
  -2  -2  -9 287.001 34.0221   4
   2   2   9 229.536 43.7539   5
   2  -2   9 249.988 14.6411   9
  -2   2  -9 219.346 26.1100   3
  -2  -2  -9 263.923 30.2343   2
   2   2   9 227.062 29.5740   2
   2  -2   9 184.340 30.6557   2
  -2   2 -10 149243. 2774.68  11
   2  -2  10 156339. 2774.05  10
  -2   2 -10 141295. 2786.79  10
  -2  -2 -10 147737. 2768.98   4
   2  -2  10 150575. 2707.68   9
   2  -2  10 145713. 2778.63   2
  -2   2 -10 152348. 2749.68   3
  -2  -2 -10 151140. 2764.99   2
   2   2  10 146927. 2764.72   2
   2   2  10 146807. 2792.41   1
  -2   2 -11 10955.2 278.467  11
  -2   2 -11 10874.0 290.528  10
   2  -2  11 11124.8 273.609  10
  -2  -2 -11 10604.4 272.396   4
   2  -2  11 11174.0 223.258   9
  -2  -2 -11 10935.1 271.137   2
   2  -2  11 10477.8 282.100   2
   2   2  11 10552.2 270.587   2
  -2   2 -11 10813.5 253.585   3
   2   2  11 10124.4 287.387   1
  -2   2 -12 1205.85 79.9550  10
   2  -2  12 1186.81 71.2873  10
  -2  -2 -12 953.776 66.3976   4
   2  -2  12 1094.80 43.9762   9
  -2   2 -12 1214.22 61.7817   3
   2  -2  12 1165.23 76.3472   2
   2   2  12 1013.11 66.8929   2
   2   2  12 1154.25 79.1044   1
   2   2  13 31036.9 688.500   1
  -2   2 -13 30878.3 664.915  11
   2   2  13 32356.6 714.878  10
  -2   2 -13 30151.2 685.246  10
   2  -2  13 32906.1 657.702  10
  -2  -2 -13 29091.8 651.927   4
   2  -2  13 31762.2 599.849   9
   2  -2  13 32229.0 676.238   2
  -2   2 -13 31673.5 631.522   3
   2   2  13 30976.1 660.923   2
  -2  -2 -13 27459.4 741.777   5
   2   2  14 5902.67 209.464   1
  -2   2 -14 5778.62 193.209  11
   2   2  14 6197.23 225.810  10
  -2   2 -14 5475.24 202.439  10
  -2  -2 -14 5610.54 183.946   4
   2  -2  14 6079.80 145.001   9
   2   2  14 5742.44 189.935   2
  -2  -2 -14 6044.42 190.540   2
   2  -2  14 5912.18 200.959   2
  -2   2 -14 5745.14 167.387   3
  -2  -2 -14 5786.85 252.408   5
  -2   2 -15 167.815 38.8051  11
   2   2  15 254.682 52.4093  10
  -2   2 -15 187.560 44.2889  10
  -2  -2 -15 191.609 40.3908   4
  -2  -2 -15 186.317 54.7505   5
   2  -2  15 213.617 24.8179   9
   2   2  15 187.642 38.9840   2
  -2   2 -15 236.663 32.4915   3
   2   2  15 157.987 42.4828   1
  -2  -2 -15 215.715 40.1954   2
   2  -2  15 257.158 46.2562   2
   2   2  16 23135.4 560.295   1
  -2   2 -16 22757.0 532.083  11
   2   2  16 23070.1 568.676  10
  -2   2 -16 22200.7 553.869  10
  -2  -2 -16 21702.6 514.342   4
   2  -2  16 23741.0 464.016   9
   2   2  16 22120.2 526.271   2
  -2  -2 -16 22964.1 526.540   2
   2  -2  16 22928.7 542.011   2
  -2   2 -16 22949.7 489.334   3
  -2  -2 -16 22646.0 633.974   5
  -2  -2 -17 309.966 54.1052   2
   2  -2  17 293.504 54.1660   2
   2   2  17 260.349 57.8115   1
  -2   2 -17 290.248 52.4548  11
  -2   2 -17 412.880 63.2237  10
   2  -2  17 252.406 45.8806  10
   2   2  17 229.161 62.2179  10
  -2   2 -17 337.885 75.3381   5
  -2  -2 -17 324.871 51.8939   4
   2  -2  17 336.513 34.1533   9
   2   2  17 345.149 53.7011   2
  -2  -2 -17 237.185 70.7767   5
   2   2  18 31052.7 735.189   1
  -2   2 -18 32167.2 706.756  11
  -2   2 -18 30900.0 734.666  10
  -2  -2 -18 31175.2 734.453  11
   2   2  18 31281.8 736.254  10
   2  -2  18 33054.0 682.561  10
  -2   2 -18 31685.5 803.716   5
  -2  -2 -18 29162.9 680.257   4
   2  -2  18 32969.8 629.176   9
   2  -2  18 31197.9 716.227   2
   2   2  18 30456.4 699.807   2
  -2  -2 -18 32414.1 704.536   2
  -2  -2 -18 29733.3 815.403   5
   2   2  19 3935.85 188.497   1
   2  -2  19 3756.70 172.025   1
  -2  -2 -19 4200.34 190.120  11
  -2   2 -19 4026.69 171.424  11
   2   2  19 3991.27 186.088  10
   2  -2  19 4208.35 157.659  10
  -2   2 -19 3691.36 216.893   5
  -2  -2 -19 3318.18 149.779   4
   2  -2  19 3837.99 120.228   9
   2   2  19 3899.98 169.445   2
   2  -2  19 3651.93 171.252   2
  -2  -2 -19 3922.96 168.070   2
  -2  -2 -19 3743.31 226.621   5
   2   2  20 28385.2 705.492   1
   2  -2  20 29526.7 688.186   1
  -2  -2 -20 30913.0 709.756  11
  -2   2 -20 29429.6 673.876  11
   2  -2  20 30314.8 645.238  10
   2   2  20 29291.1 698.761  10
  -2  -2 -20 26314.5 642.397   4
  -2   2 -20 29090.7 782.603   5
   2  -2  20 29108.5 588.023   9
   2   2  20 28556.0 671.033   2
   2  -2  20 28736.4 682.711   2
  -2  -2 -20 30990.2 679.383   2
  -2   2 -20 29700.5 617.291   3
  -2  -2 -20 27488.1 789.361   5
   2   2  21 37.7212 47.1479   1
   2  -2  21-9.49544 47.9654   1
  -2  -2 -21 46.6483 40.7086   2
   2  -2  21 27.9307 42.2112   2
  -2   2 -21 12.8059 44.3073  11
  -2  -2 -21-5.21070 54.0847  11
   2   2  21 29.5275 48.3177  10
   2  -2  21 12.9923 38.8665  10
  -2   2 -21 57.0595 65.8225   5
  -2  -2 -21-3.64815 38.1161   4
   2  -2  21 27.4844 23.3234   9
   2   2  21 34.1948 35.6257   2
  -2   2 -21 97.1065 33.9329   3
  -2  -2 -21 8.76872 61.7643   5
   2  -2  22 1320.22 111.500   1
   2   2  22 1348.09 117.832   1
  -2  -2 -22 1375.84 116.433  11
  -2   2 -22 1236.94 102.225  11
   2   2  22 1279.90 110.034  10
   2  -2  22 1398.39 95.2327  10
  -2  -2 -22 1227.44 93.6792   4
  -2   2 -22 1077.02 132.283   5
   2  -2  22 1364.38 68.3771   9
   2  -2  22 1397.40 111.821   2
  -2  -2 -22 1366.87 105.729   2
  -2   2 -22 1397.76 79.9364   3
   2   2  22 1110.78 97.9134   2
  -2  -2 -22 1346.04 149.949   5
   2  -2  23 1984.19 136.543   1
  -2   2 -23 2104.71 135.397  11
  -2  -2 -23 2235.65 146.822  11
   2  -2  23 2262.10 121.150  10
   2   2  23 2363.20 147.340  10
  -2   2 -23 2021.62 182.199   5
  -2  -2 -23 1984.24 119.183   4
   2  -2  23 2198.07 89.6743   9
  -2   2 -23 2086.19 103.782   3
   2   2  23 2047.75 132.447   2
   2  -2  23 2071.54 135.871   2
  -2  -2 -23 2070.64 190.845   5
   2  -2  24 22667.8 588.434   1
  -2   2 -24 22574.3 568.697  11
  -2  -2 -24 22395.8 589.917  11
   2   2  24 22858.3 579.047  10
   2  -2  24 23201.3 530.885  10
  -2   2 -24 21462.1 685.860   5
   2  -2  24 22354.9 471.947   9
   2  -2  24 22379.3 581.305   2
  -2   2 -24 23058.3 504.461   3
   2   2  24 21761.8 566.931   2
  -2  -2 -24 22065.0 706.021   5
   2  -2  25 345.491 73.4869   2
   2  -2  25 288.107 73.8740   1
  -2   2 -25 358.245 78.7403  11
   2   2  25 360.098 79.5671  10
   2  -2  25 347.254 68.5774  10
  -2   2 -25 239.953 99.0237   5
  -2  -2 -25 276.548 65.9002   4
   2  -2  25 274.526 42.0970   9
   2   2  25 399.328 73.5945   2
  -2   2 -25 259.123 50.4887   3
  -2  -2 -25 211.031 96.6441   5
  -2   2 -26 6164.13 340.964   5
   2  -2  26 6585.90 226.085  10
   2   2  26 6500.54 259.231  10
  -2  -2 -26 6138.73 229.519   4
  -2   2 -26 6650.20 206.430   3
   2   2  26 6097.31 252.145   2
   2  -2  26 6366.16 267.205   1
   2  -2  26 6226.07 178.610   9
  -2   2 -27 371.684 53.1446   3
  -2  -2 -27 272.569 40.7625   3
   2  -2  27 333.960 69.4391  10
   2   2  27 291.497 77.6093  10
   2  -2  27 323.969 44.1104   9
   2  -2  28 2591.94 137.097  10
   2   2  28 2215.13 152.845  10
   2  -2  28 2471.38 100.524   9
   2   4 -28 2045.43 137.159   3
  -2  -4  28 2225.49 144.710   1
   2   4 -27 225.059 93.4979   5
  -2   4  27 119.068 78.0365  10
   2   4 -27 202.759 58.6756   3
  -2  -4  27 200.814 61.5297   1
   2   4 -26 58.2926 52.7959  11
  -2   4  26 146.459 73.5079  10
   2   4 -26 78.0447 70.7857   5
   2   4 -26 62.9939 50.8310   3
  -2  -4  26 4.72627 60.6120   1
   2   4 -25 30.5945 55.6496  11
  -2   4  25 87.1884 66.3356  10
   2   4 -25 125.504 80.3178   5
  -2  -4  25 35.9306 28.0499   9
   2   4 -25 198.281 53.2505   3
  -2  -4  25 22.8234 53.2578   1
   2  -4 -25 31.9106 46.5418   2
   2   4 -24 523.868 79.2932  11
  -2  -4  24 414.691 45.0913   9
  -2   4  24 551.891 101.723  10
  -2   4  24 477.951 86.0564   1
   2  -4 -24 455.116 76.4977   2
  -2  -4  24 495.061 71.2433   1
   2   4 -24 387.969 97.5448   5
  -2  -4  24 406.130 73.5606   2
   2   4 -24 542.565 71.5324   3
   2  -4 -24 524.628 111.258   5
   2   4 -23 1172.14 106.875  11
  -2  -4  23 992.417 63.8192   9
  -2   4  23 1208.28 131.139  10
  -2  -4  23 1040.99 94.4158   1
  -2   4  23 1035.45 108.515   1
   2   4 -23 1215.60 133.460   5
   2  -4 -23 1316.67 111.111   2
  -2  -4  23 1030.98 102.867   2
   2   4 -23 1172.70 97.2151   3
   2  -4 -23 1209.76 149.022   5
   2   4 -22 18695.6 479.994  11
  -2   4  22 19119.0 543.488  10
  -2  -4  22 16937.5 388.497   9
  -2  -4  22 18292.7 463.205   1
  -2   4  22 17978.5 508.923   1
   2   4 -22 18097.9 551.043   5
   2  -4 -22 18778.5 487.425   2
   2   4 -22 19240.2 472.219   3
  -2  -4  22 17405.7 480.258   2
   2  -4 -22 17197.7 585.072   5
   2   4 -21 926.259 92.2528  11
  -2   4  21 709.385 106.872  10
  -2  -4  21 747.266 54.4742   9
  -2  -4  21 695.603 77.2759   1
  -2   4  21 714.428 95.2910   1
   2   4 -21 724.756 108.675   5
   2  -4 -21 703.432 118.258   5
   2  -4 -21 915.747 92.0212   2
  -2  -4  21 725.182 84.7511   2
   2   4 -21 923.810 86.6118   3
   2   4 -20 39503.7 820.081   3
   2  -4 -20 38760.4 831.291   2
  -2  -4  20 37169.8 828.956   2
   2   4 -20 39049.3 822.635  11
  -2  -4  20 35588.5 730.830   9
   2   4 -20 37161.4 894.272   5
   2  -4 -20 37520.3 952.361   5
  -2  -4  20 37406.7 800.514   1
  -2   4  20 37760.0 856.872   1
   2   4 -19 1415.44 101.422   3
  -2  -4  19 1335.13 102.037   2
   2  -4 -19 1459.25 105.596   2
  -2  -4  19 1421.84 93.3481   1
  -2   4  19 1506.87 118.236   1
   2   4 -19 1317.08 99.4936  11
  -2   4  19 1543.22 146.448   5
   2   4 -19 1313.34 125.357   5
  -2   4  19 1539.25 130.001   6
   2  -4 -19 1314.65 135.524   5
  -2  -4  18 19883.1 503.649   2
   2  -4 -18 20908.5 509.384   2
   2   4 -18 21965.9 506.367   3
   2   4 -18 19325.6 455.125  10
   2   4 -18 20955.4 498.539  11
  -2  -4  18 20256.6 480.510   1
  -2   4  18 20490.2 531.385   1
   2   4 -18 20134.6 556.939   5
  -2   4  18 21151.0 607.922   5
  -2   4  18 20022.1 563.725   6
   2  -4 -18 19966.8 600.796   5
  -2  -4  17 934.819 80.0512   2
   2   4 -17 872.080 76.7254   3
   2  -4 -17 908.619 78.7267   2
   2   4 -17 856.588 77.2134  11
   2   4 -17 884.230 62.8198  10
  -2  -4  17 952.582 70.9575   1
  -2   4  17 752.933 82.6809   1
  -2   4  17 993.725 113.236   5
   2   4 -17 882.427 95.4260   5
  -2   4  17 849.727 95.3154   6
   2  -4 -17 898.852 108.963   5
   2   4 -16 25470.1 566.144   3
  -2  -4  16 24178.0 563.752   2
   2  -4 -16 23764.2 564.034   2
   2   4 -16 24416.6 552.446  11
   2   4 -16 23670.9 514.976  10
  -2  -4  16 24269.5 536.577   1
  -2   4  16 23588.4 585.630   1
  -2   4  16 24618.9 669.346   5
  -2   4  16 23442.7 619.674   6
   2  -4 -16 23216.1 654.846   5
   2  -4 -15 7102.48 228.994   2
  -2  -4  15 6686.94 223.010   2
   2   4 -15 7453.94 231.709   3
   2   4 -15 6224.80 184.857  10
   2   4 -15 7008.68 218.279  11
  -2   4  15 6650.15 241.029   1
  -2  -4  15 6952.76 205.293   1
  -2   4  15 6677.58 263.779   6
  -2   4  15 7079.56 297.283   5
   2  -4 -15 6667.80 287.119   5
   2  -4 -14 91783.5 1790.11   2
   2   4 -14 98883.2 1802.80   3
  -2  -4  14 92946.6 1786.10   2
   2   4 -14 87405.7 1732.02  10
   2   4 -14 96354.9 1780.46  11
  -2   4  14 91149.6 1814.74   1
  -2  -4  14 93665.6 1757.19   1
  -2   4  14 92149.4 1858.76   6
   2  -4 -14 88499.2 1895.33   5
  -2   4  14 94904.2 1912.01   5
   2   4 -13 12838.1 333.399   3
  -2  -4  13 12422.9 322.368   2
   2  -4 -13 12371.6 325.231   2
  -2   4  13 12003.1 340.931   1
  -2  -4  13 12579.9 299.052   1
   2   4 -13 12527.4 317.143  11
  -2  -4  13 12304.2 318.167  11
   2   4 -13 11737.2 280.926  10
  -2   4  13 12297.5 372.859   6
   2  -4 -13 12230.7 395.739   5
  -2   4  13 12764.0 410.080   5
   2   4 -12 25326.4 552.857   3
  -2  -4  12 24272.8 537.754   2
   2  -4 -12 24786.7 543.822   2
   2  -4 -12 24438.2 572.680   1
  -2  -4  12 23703.2 506.913   1
  -2   4  12 22994.5 556.455   1
  -2  -4  12 25448.6 533.948  11
   2   4 -12 23704.5 529.977  11
   2   4 -12 24086.9 495.964  10
  -2   4  12 25073.6 489.106   4
   2   4 -12 23529.9 493.870   9
  -2   4  12 24021.2 594.355   6
   2  -4 -12 23039.2 613.267   5
  -2   4  12 23868.4 634.734   5
   2   4 -11 4492.78 163.041   3
  -2  -4  11 4696.73 156.709   2
  -2   4  11 4206.28 165.982   1
  -2  -4  11 4483.30 133.126   1
   2  -4 -11 4652.15 178.041   1
   2   4 -11 4671.86 153.782  11
  -2  -4  11 4208.02 146.633  11
   2   4 -11 4248.90 128.409  10
  -2   4  11 4640.97 126.161   4
   2   4 -11 4696.91 128.747   9
  -2   4  11 4372.54 188.991   6
   2  -4 -11 4083.47 196.001   5
  -2   4  11 4391.42 209.261   5
  -2  -4  10 1123.01 67.4305   2
   2   4 -10 1114.30 73.9969   3
  -2  -4  10 1102.94 53.0869   1
  -2   4  10 1031.95 75.1606   1
   2  -4 -10 1096.53 80.9138   1
   2   4 -10 1143.30 68.5516  11
  -2  -4  10 1080.86 63.0567  11
   2   4 -10 1038.58 54.9071  10
  -2   4  10 1048.24 53.1669   4
   2   4 -10 1098.31 52.3804   9
   2  -4 -10 1000.56 75.2192   7
  -2   4  10 1131.41 89.8463   6
  -2   4  10 1136.41 103.283   5
  -2  -4   9 412.237 40.2467   2
  -2   4   9 422.191 48.2642   1
  -2  -4   9 419.948 30.9599   1
  -2  -4   9 425.162 38.3463  11
   2   4  -9 470.413 43.8545  11
   2   4  -9 392.009 34.9856  10
  -2   4   9 461.939 36.9066   4
  -2  -4   9 445.476 40.8325   8
  -2   4   9 362.149 52.2495   6
   2  -4  -9 354.947 45.8585   7
  -2   4   9 593.041 73.4800   5
  -2  -4   8 59185.3 1150.38   2
  -2  -4   8 59880.2 1112.91   1
  -2   4   8 58833.6 1178.04   1
   2   4  -8 58629.1 1155.35  11
  -2  -4   8 59044.4 1137.93  11
   2   4  -8 60091.0 1138.06  10
  -2  -4   8 58946.7 1164.03   3
  -2   4   8 60675.3 1140.76   4
   2   4  -8 60614.0 1125.67   9
  -2  -4   8 60394.0 1148.72   8
   2  -4  -8 58795.4 1175.73   7
  -2   4   8 60329.9 1220.16   6
  -2   4   8 61498.3 1264.91   5
  -2  -4   7 5008.14 146.642   2
  -2   4   7 5200.36 165.260   1
  -2  -4   7 5030.97 116.963   1
   2  -4  -7 5189.87 172.915   1
  -2  -4   7 5053.38 138.052  11
   2   4  -7 5127.89 155.601  11
   2   4  -7 5199.77 135.416   9
  -2  -4   7 5022.76 159.857   3
  -2  -4   7 5341.36 149.450   8
  -2   4   7 5120.34 187.826   6
   2  -4  -7 4894.03 162.185   7
  -2   4   7 4945.64 207.137   5
  -2  -4   6 36270.1 715.557   2
  -2  -4   6 36505.9 670.434   1
  -2   4   6 36174.0 739.732   1
   2  -4  -6 36547.6 752.363   1
  -2  -4   6 36061.9 705.333  11
   2   4  -6 35210.9 727.783  11
   2   4  -6 37233.1 706.718   9
  -2  -4   6 36663.5 742.226   3
  -2  -4   6 36623.3 718.903   8
   2  -4  -6 35588.5 738.803   7
  -2   4   6 36158.3 777.007   6
  -2   4   6 37495.6 816.745   5
  -2  -4   5 25993.5 525.189   2
  -2  -4   5 26282.5 521.953  11
   2   4  -5 25369.3 543.144  11
  -2  -4   5 27069.0 557.408   3
  -2   4   5 25725.9 549.807   1
   2  -4  -5 25975.4 560.010   1
  -2  -4   5 26883.4 534.023   8
   2  -4  -5 26560.3 552.633   7
  -2   4   5 27063.8 621.761   5
   2   4  -5 26238.3 538.681   5
  -2  -4   4 6679.68 162.594   2
  -2  -4   4 6694.02 165.157  11
  -2  -4   4 6522.83 192.069   3
  -2   4   4 6533.94 181.410   1
   2  -4  -4 6966.13 191.746   1
  -2  -4   4 6983.53 175.876   8
   2  -4  -4 6535.80 186.324   7
  -2   4   4 6538.07 227.849   5
   2   4  -4 7031.30 181.838   5
  -2  -4   3 5654.26 133.851   2
  -2  -4   3 5364.26 142.708  11
  -2  -4   3 5667.15 165.734   3
   2   4  -3 5190.91 139.663   8
   2   4  -3 5167.43 152.748   5
  -2   4   3 5132.20 192.008   5
  -2   4   3 5332.19 153.388   7
   2  -4  -3 5052.48 153.284   7
   2  -4  -3 5808.89 162.035   1
  -2   4   3 5633.91 153.610   1
  -2  -4   2 102.079 24.9888   3
   2  -4  -2 62.4973 21.4856   3
  -2   4   2 156.373 21.7140   1
  -2  -4   2 52.8128 16.8306  11
   2   4  -2 83.1656 18.0745   8
  -2   4   2 58.9272 23.9820   8
   2  -4  -2 66.7044 19.8924   7
  -2   4   2 126.062 23.5266   7
  -2  -4   2 47.1111 17.5886   6
   2   4  -2 101.470 23.3014   5
  -2   4   2 104.881 32.2183   5
   2  -4  -1 4962.75 160.388   3
   2   4  -1 5348.71 163.473   3
   2  -4  -1 5310.88 146.365   1
   2   4  -1 5260.36 108.316   1
  -2   4   1 5244.51 139.382   1
  -2  -4   1 5262.11 147.745  11
  -2   4   1 5431.90 167.795   8
  -2  -4   1 5043.17 160.545   7
   2   4  -1 5119.89 143.212   8
  -2  -4   1 5444.97 152.281   6
  -2   4   1 5220.75 146.377   7
   2  -4  -1 5215.17 149.496   7
   2   4  -1 5173.02 159.068   5
  -2   4   1 5083.48 182.559   5
  -2  -4   1 5226.82 146.330   5
  -2  -4   0 53221.4 1023.11   5
  -2   4   0 52013.7 1063.67   5
   2   4   0 54511.9 1041.97   5
   2  -4   0 50548.2 1014.90   7
  -2   4   0 53281.3 1040.52   8
   2   4   0 52950.7 1017.29   8
   2  -4   0 54261.9 1010.90   1
   2   4   0 52183.0 977.754   1
  -2   4   0 53701.0 1016.34   7
  -2  -4   0 53264.2 1040.84   7
  -2  -4   0 53629.6 1025.01   6
   2   4   0 53656.1 1035.59   3
   2  -4   0 51973.1 1037.93   3
  -2  -4  -1 136.042 25.9422   6
  -2   4  -1 101.815 31.9081   5
   2   4   1 308.939 39.4683   5
  -2  -4  -1 189.918 30.7486   5
  -2   4  -1 137.770 28.4095   8
   2   4   1 172.191 18.8894   1
   2  -4   1 243.118 25.7812   1
  -2  -4  -1 177.009 30.7178   7
  -2   4  -1 219.190 27.7649   7
   2  -4   1 113.457 25.9931   3
   2   4   1 121.124 26.2529   3
  -2   4  -2 14311.0 356.074   5
  -2  -4  -2 15088.8 352.124   5
   2   4   2 15185.2 361.101   5
   2   4   2 14560.8 309.570   1
   2  -4   2 14494.2 311.803   1
   2  -4   2 14104.0 351.308   8
  -2   4  -2 14680.9 342.566   8
  -2  -4  -2 14835.8 346.980   7
  -2   4  -2 14676.5 325.939   7
  -2  -4  -2 14675.1 343.510   6
   2   4   2 15210.3 344.057   6
   2  -4   2 14671.3 346.229   3
   2   4   2 14838.7 340.465   3
  -2  -4  -3 44.4047 20.7020   3
   2  -4   3 80.2691 24.9007   3
  -2   4  -3 32.5572 27.0483  11
   2  -4   3 60.0695 24.0117  11
   2   4   3 93.0922 28.4060   4
   2  -4   3 36.9197 16.4194   1
   2   4   3 41.9424 17.3411   1
   2  -4   3 43.9885 27.0049   8
  -2   4  -3 93.3888 26.5264   8
   2   4   3 65.4475 26.7862   6
  -2  -4  -3 63.9707 24.7776   7
  -2   4  -3 49.3879 20.4987   7
  -2   4  -3 56.8421 27.3639   5
  -2  -4  -3 59.4775 25.5168   6
   2   4   3 152.967 34.5113   5
   2  -4   4 133484. 2472.15   3
  -2  -4  -4 132751. 2414.36   2
  -2  -4  -4 137484. 2466.29   3
   2   4   4 130704. 2446.89   1
  -2   4  -4 132738. 2491.93  11
   2  -4   4 128943. 2467.49  11
   2   4   4 130986. 2482.60   4
   2  -4   4 132449. 2481.21   8
  -2   4  -4 133512. 2456.29   7
  -2  -4  -4 134218. 2480.71   7
  -2  -4  -4 133494. 2488.28   6
   2   4   4 130853. 2490.76   6
  -2  -4  -4 131743. 2498.74   5
   2   4   4 129452. 2508.61   5
  -2  -4  -5 602.109 32.9806   2
   2  -4   5 583.186 49.7569   3
  -2  -4  -5 554.645 45.5739   3
   2   4   5 606.018 45.6216   1
   2  -4   5 470.613 44.0751  11
  -2   4  -5 587.169 54.7341  11
  -2   4  -5 585.082 50.6784  10
   2   4   5 581.162 52.4160   4
   2  -4   5 669.289 55.7490   8
  -2  -4  -5 621.377 53.3004   7
   2   4   5 584.887 55.0355   6
  -2  -4  -5 653.186 61.2920   5
   2   4   5 569.317 60.6518   5
  -2  -4  -6 321.525 26.6435   2
   2  -4   6 331.120 37.5861   3
  -2  -4  -6 344.117 35.6017   3
   2   4   6 560.419 45.4173   1
   2  -4   6 328.808 36.9251  11
  -2   4  -6 400.380 46.8296  11
  -2   4  -6 436.178 44.2673  10
   2   4   6 313.873 40.6803   4
   2  -4   6 495.720 47.8981   8
  -2  -4  -6 360.522 42.2217   7
   2   4   6 372.529 48.2015   6
   2   4   6 470.957 56.8640   5
  -2  -4  -6 367.212 51.1589   5
  -2  -4  -7 4401.65 122.092   2
   2  -4   7 4084.00 142.699   3
  -2  -4  -7 4187.20 135.174   3
   2   4   7 4139.94 144.445   1
   2  -4   7 4186.74 140.810  11
  -2   4  -7 4238.56 155.369  11
  -2   4  -7 4271.62 148.117  10
   2   4   7 4631.37 154.204   4
  -2   4  -7 4247.53 88.1475   9
   2   4   7 4274.35 168.160   6
  -2  -4  -7 4442.68 157.287   7
  -2  -4  -7 4426.13 181.371   5
   2   4   7 3938.44 174.414   5
  -2  -4  -8 30994.2 619.970   2
  -2  -4  -8 31246.5 637.215   3
   2  -4   8 31105.9 646.407  11
  -2   4  -8 31260.8 668.258  11
  -2   4  -8 30984.4 655.711  10
   2   4   8 30881.7 658.854   1
   2   4   8 32417.1 660.553   4
   2  -4   8 30708.7 647.471   3
  -2  -4  -8 31476.9 672.675   7
   2   4   8 31039.2 695.041   6
  -2  -4  -8 30763.4 718.299   5
   2   4   8 30136.4 713.532   5
  -2  -4  -9 16487.6 361.959   2
  -2  -4  -9 17027.7 372.861   3
   2  -4   9 16279.7 382.410  11
  -2   4  -9 16684.1 401.998  11
  -2   4  -9 16328.5 388.655  10
   2   4   9 15886.9 395.567   1
   2   4   9 16894.1 391.140   4
   2  -4   9 16668.7 382.247   3
   2   4   9 16390.5 430.742   6
  -2  -4  -9 16199.1 406.708   7
  -2  -4  -9 16080.1 449.119   5
   2   4   9 16465.2 449.776   5
  -2  -4 -10 30932.2 632.397   3
  -2  -4 -10 30500.1 629.054   2
   2  -4  10 31643.7 660.781   2
   2  -4  10 31107.7 649.981  11
  -2   4 -10 32147.7 672.486  11
  -2   4 -10 30088.7 655.525  10
   2   4  10 30477.1 668.797   1
   2   4  10 29714.0 726.010   5
   2   4  10 31705.8 654.226   4
   2  -4  10 30516.6 640.911   3
  -2  -4 -10 30255.3 674.832   7
   2   4  10 30240.9 705.219   6
  -2  -4 -10 29398.2 728.625   5
  -2  -4 -11 2515.63 101.938   2
   2  -4  11 2581.78 116.640   2
   2  -4  11 2620.83 114.892  11
  -2   4 -11 2484.90 120.113  11
  -2   4 -11 2374.15 111.288  10
   2   4  11 2522.35 123.702   1
   2   4  11 2580.08 151.790   5
   2   4  11 2460.86 111.587   4
   2  -4  11 2350.90 102.587   3
   2   4  11 2585.58 143.203   6
  -2  -4 -11 2320.46 121.408   7
  -2  -4 -11 2520.88 153.319   5
   2  -4  12 62171.9 1212.73   2
   2  -4  12 62936.3 1205.31  11
  -2   4 -12 61631.8 1218.33  11
  -2   4 -12 58153.4 1199.69  10
   2   4  12 59551.9 1226.36   1
   2  -4  12 59269.8 1177.25   3
   2   4  12 60286.5 1292.99   5
   2   4  12 62401.2 1199.62   4
   2   4  12 60558.7 1271.24   6
  -2  -4 -12 58940.8 1233.88   7
  -2  -4 -12 59279.3 1306.31   5
  -2   4 -13 210.461 39.1112   3
  -2   4 -13 149.784 38.3196  11
   2  -4  13 143.886 38.8035  11
  -2   4 -13 168.675 40.7558  10
   2   4  13 181.833 44.5081   1
   2  -4  13 110.130 35.2034   2
   2   4  13 175.722 39.4629   4
  -2  -4 -13 161.628 34.8712   4
   2   4  13 185.039 56.3215   5
  -2  -4 -13 115.497 39.7942   7
  -2  -4 -13 179.277 60.3099   5
   2   4  13 133.550 48.2847   6
  -2   4 -14 3700.20 153.743  11
   2  -4  14 3081.81 142.775  11
  -2   4 -14 3092.76 137.913  10
   2   4  14 3082.83 150.428   1
  -2  -4 -14 3355.15 135.602   4
   2   4  14 3117.20 177.568   5
  -2  -4 -14 2948.53 152.004   7
   2   4  14 3038.69 167.933   6
   2  -4  14 3163.35 144.561   2
  -2  -4 -14 3215.92 129.610   2
  -2   4 -14 3202.75 130.830   3
   2   4  15 4112.20 207.349  10
  -2   4 -15 3777.89 163.999  11
   2  -4  15 3933.31 169.307  11
  -2   4 -15 3914.76 161.689  10
   2   4  15 4091.08 179.575   1
   2   4  15 4051.71 208.374   5
  -2  -4 -15 3997.93 153.522   4
  -2  -4 -15 3776.18 176.335   7
   2   4  15 3855.67 197.278   6
  -2  -4 -15 4124.68 153.355   2
  -2   4 -15 3970.96 151.354   3
   2  -4  15 3995.93 168.116   2
   2  -4  16 27371.2 624.579  11
   2   4  16 26487.5 681.958  10
  -2   4 -16 27424.5 619.734  11
  -2   4 -16 25231.9 607.723  10
   2   4  16 25533.2 633.715   1
  -2  -4 -16 25894.1 587.436   4
   2   4  16 26831.6 693.755   5
   2   4  16 25726.7 672.265   6
  -2  -4 -16 25573.2 636.460   7
  -2  -4 -16 26663.4 593.250   2
   2  -4  16 27099.0 618.750   2
  -2   4 -16 27689.7 592.530   3
   2  -4  17 14565.0 402.285  11
   2   4  17 14563.3 445.616  10
  -2   4 -17 14218.7 390.803  11
   2  -4  17 14083.0 357.837  10
  -2   4 -17 13190.7 380.887  10
   2   4  17 14365.5 411.192   1
  -2  -4 -17 14295.4 363.839   4
   2   4  17 13650.0 440.021   6
  -2   4 -17 14679.5 365.133   3
  -2  -4 -17 14867.9 374.346   2
   2  -4  17 14373.7 392.709   2
   2  -4  18 37533.6 836.816  11
  -2   4 -18 39372.0 826.944  11
   2   4  18 37319.7 885.013  10
   2  -4  18 37658.9 777.726  10
  -2   4 -18 34272.5 808.786  10
   2   4  18 35364.3 836.257   1
  -2  -4 -18 35775.8 777.764   4
   2   4  18 35922.0 884.685   6
  -2  -4 -18 37579.1 794.435   2
  -2   4 -18 37557.0 780.686   3
   2  -4  18 35499.3 816.284   2
  -2   4 -19 2243.76 133.213  11
   2   4  19 2336.19 161.513  10
   2  -4  19 2238.27 112.810  10
  -2   4 -19 1827.40 123.203  10
   2  -4  19 2041.19 120.256   1
   2   4  19 2108.17 138.613   1
  -2  -4 -19 1881.45 107.682   4
   2   4  19 2058.19 158.887   6
   2  -4  19 1834.84 123.819   2
  -2   4 -19 2104.74 111.527   3
  -2  -4 -19 2218.07 122.636   2
  -2   4 -20 3008.13 158.238  11
   2  -4  20 3036.58 133.053  10
   2   4  20 2948.74 183.377  10
  -2   4 -20 2577.77 152.375  10
   2  -4  20 2787.08 144.538   1
   2   4  20 2562.24 158.497   1
  -2  -4 -20 2608.69 126.304   4
   2   4  20 2741.91 182.845   6
  -2   4 -20 2841.31 131.689   3
   2  -4  20 2691.80 153.702   2
  -2  -4 -20 2638.27 138.001   2
  -2   4 -21 1384.23 113.015  11
  -2  -4 -21 1187.99 123.383  11
   2   4  21 1476.81 134.713  10
   2  -4  21 1434.08 92.9944  10
  -2   4 -21 1182.87 106.434  10
   2  -4  21 1389.77 105.971   1
   2   4  21 1394.38 119.942   1
  -2   4 -21 1645.07 154.615   5
  -2  -4 -21 1379.57 92.5574   4
   2   4  21 1527.72 139.698   6
  -2  -4 -21 1448.64 103.138   2
  -2   4 -21 1432.63 94.2868   3
   2  -4  21 1422.95 115.300   2
  -2   4 -22 18992.3 500.713  11
  -2   4 -22 18030.1 502.178  10
   2  -4  22 19077.5 452.645  10
   2   4  22 18619.0 542.205  10
   2  -4  22 19408.0 496.624   1
   2   4  22 18279.2 524.209   1
  -2   4 -22 18537.0 588.547   5
  -2  -4 -22 17389.5 445.732   4
   2   4  22 19043.7 569.128   6
  -2  -4 -22 20336.2 492.670   2
   2  -4  22 16282.5 489.266   2
  -2   4 -22 19248.4 457.708   3
  -2   4 -23 536.290 80.9978  11
   2  -4  23 377.021 61.7105  10
   2   4  23 452.441 95.2496  10
   2   4  23 501.059 85.7690   1
  -2  -4 -23 450.944 70.7846   2
   2  -4  23 413.541 71.1855   1
  -2   4 -23 248.504 93.6023   5
  -2  -4 -23 364.836 58.4338   4
   2   4  23 300.521 90.1805   6
  -2   4 -23 403.369 60.4321   3
   2  -4  24 4591.13 207.231   1
   2   4  24 4103.97 219.931   1
   2   4  24 4713.97 238.971  10
   2  -4  24 4431.05 174.196  10
  -2   4 -24 4837.45 216.377  11
  -2   4 -24 4999.27 282.448   5
  -2  -4 -24 4251.23 170.124   4
   2   4  24 4298.81 249.751   6
  -2  -4 -24 4657.08 204.976   2
  -2   4 -24 4966.77 183.273   3
  -2   4 -25 270.644 109.255   5
   2   4  25 224.372 84.7252  10
   2  -4  25 243.595 61.4165  10
  -2  -4 -25 168.105 65.4208   2
   2  -4  25 264.467 72.1225   1
  -2   4 -25 254.997 55.0219   3
   2  -4  26 17916.9 507.109   1
  -2   4 -26 19113.1 463.818   3
   2  -4  27 226.980 73.5230   1
  -2   4 -27 249.921 58.1772   3
  -2  -6  26 594.136 76.2016   1
   2   6 -26 424.543 100.549   5
  -2  -6  25 828.028 82.9429   1
   2   6 -25 854.890 130.434   5
   2   6 -25 885.313 108.988  11
   2   6 -24 18387.1 570.574   5
  -2  -6  24 18213.4 464.697   1
   2  -6 -24 19222.3 512.137   2
   2   6 -24 19510.0 515.684   3
   2   6 -24 19956.8 536.011  11
   2   6 -23 1969.53 164.609   5
   2   6 -23 2287.10 151.889  11
   2  -6 -23 2136.30 141.172   2
  -2  -6  23 2185.17 142.543   2
   2   6 -23 2128.03 142.030   3
  -2  -6  23 2044.90 116.849   1
  -2  -6  22 16635.8 414.755   1
  -2   6  22 16010.7 480.244   1
   2   6 -22 15995.0 508.064   5
   2   6 -22 17613.7 477.087  11
  -2  -6  22 16918.7 436.091   8
   2  -6 -22 15388.3 486.034   7
   2   6 -22 17851.1 471.138   3
   2  -6 -22 17252.8 461.820   2
  -2  -6  22 16135.5 458.177   2
  -2  -6  21 2406.20 120.986   1
  -2   6  21 2405.77 158.676   1
   2   6 -21 2280.32 110.916  10
   2   6 -21 2738.86 157.770  11
  -2   6  21 2369.28 200.560   5
   2   6 -21 2363.77 169.376   5
  -2  -6  21 2638.89 135.448   8
  -2   6  21 2461.26 183.018   6
   2  -6 -21 2136.04 154.716   7
  -2  -6  21 2749.17 152.175   2
   2   6 -21 2747.92 154.110   3
   2  -6 -21 2557.38 147.616   2
  -2  -6  20 2392.29 116.335   1
  -2   6  20 2282.90 150.186   1
   2   6 -20 2626.36 152.372  11
   2   6 -20 2283.62 109.567  10
   2   6 -20 2521.64 169.338   5
  -2   6  20 2324.07 197.566   5
  -2  -6  20 2544.55 131.087   8
  -2   6  20 2477.89 179.273   6
   2  -6 -20 2150.10 150.830   7
   2   6 -20 2696.07 153.081   3
   2  -6 -20 2476.57 141.077   2
  -2  -6  20 2339.86 141.876   2
   2   6 -19 206.647 61.8226   3
   2  -6 -19 246.556 55.9702   2
  -2   6  19 88.6893 50.9167   1
  -2  -6  19 139.821 40.9925   1
  -2  -6  19 107.723 44.2178   2
   2   6 -19 101.532 56.6379  11
   2   6 -19 163.280 42.3992  10
  -2   6  19 285.512 88.9178   5
  -2  -6  19 199.207 51.4605   8
   2  -6 -19 153.242 61.1875   7
  -2   6  19 125.587 71.0265   6
  -2  -6  18 6664.46 202.098   1
  -2   6  18 6812.37 257.984   1
   2   6 -18 7366.55 253.810  11
   2   6 -18 6272.53 195.558  10
  -2   6  18 7246.82 331.747   5
  -2  -6  18 6677.06 223.589   8
  -2   6  18 6638.02 287.025   6
   2  -6 -18 5909.51 251.433   7
   2   6 -18 7066.91 252.610   3
   2  -6 -18 7008.01 238.955   2
  -2  -6  18 6299.79 233.646   2
  -2   6  17 177.769 54.6279   1
  -2  -6  17 129.470 44.3881   2
  -2  -6  17 114.265 32.0020   1
   2  -6 -17 187.617 50.8299   2
   2   6 -17 188.780 49.8543  11
   2   6 -17 187.740 37.4522  10
  -2   6  17 144.329 67.8544   5
  -2  -6  17 140.009 43.8641   8
   2  -6 -17 84.9495 45.7704   7
  -2   6  17 142.431 61.7171   6
   2   6 -17 121.523 45.5422   3
   2   6 -16 5925.78 223.330   3
   2  -6 -16 5565.49 205.799   2
  -2  -6  16 5386.07 202.898   2
  -2  -6  16 5632.13 169.606   1
  -2   6  16 5854.14 226.658   1
  -2  -6  16 5812.45 207.530  11
   2   6 -16 5742.80 216.480  11
   2   6 -16 5424.64 171.756  10
  -2  -6  16 5773.50 199.666   8
   2  -6 -16 5570.82 228.511   7
  -2   6  16 5821.83 257.883   6
  -2   6  16 5537.23 283.433   5
  -2   6  15 30.6287 42.6470   1
   2  -6 -15 53.6608 38.1021   2
  -2  -6  15 31.7800 36.4156   2
  -2  -6  15 45.5663 27.0409   1
   2   6 -15 118.266 46.4687  11
  -2  -6  15 30.1305 38.2379  11
   2   6 -15 59.9557 30.4985  10
  -2   6  15 9.67473 26.4780   4
  -2   6  15 55.3988 62.5047   5
  -2  -6  15 19.4147 35.3159   8
   2  -6 -15 41.3361 47.3615   7
  -2   6  15 95.8681 54.7991   6
   2   6 -15 38.5954 42.7230   3
  -2  -6  14 10967.4 312.067   2
   2   6 -14 12232.1 345.560   3
   2  -6 -14 11603.1 319.667   2
  -2   6  14 11099.8 335.674   1
  -2  -6  14 11200.5 263.963   1
   2   6 -14 12128.2 333.424  11
  -2  -6  14 11756.6 311.274  11
   2   6 -14 10711.8 280.573  10
  -2   6  14 11516.7 277.998   4
  -2  -6  14 12034.7 314.013   8
   2   6 -14 11007.5 262.311   9
  -2   6  14 11095.1 374.257   6
   2  -6 -14 11036.6 340.840   7
  -2   6  14 11801.5 424.376   5
  -2  -6  13 1393.07 91.9406   2
   2  -6 -13 1479.30 95.0810   2
   2   6 -13 1518.86 107.730   3
  -2  -6  13 1591.49 67.0044   1
  -2   6  13 1606.89 107.433   1
   2   6 -13 1702.11 104.870  11
  -2  -6  13 1547.49 88.8758  11
   2   6 -13 1487.84 80.4734  10
  -2   6  13 1468.11 79.0933   4
  -2  -6  13 1569.20 93.4916   8
   2   6 -13 1470.77 68.4632   9
   2  -6 -13 1536.38 109.561   7
  -2   6  13 1470.06 122.889   6
  -2   6  13 1646.79 149.648   5
   2  -6 -12 29495.5 642.853   2
  -2  -6  12 29445.9 635.984   2
   2   6 -12 31403.7 682.447   3
  -2  -6  12 28661.3 571.535   1
  -2   6  12 28088.7 661.942   1
  -2  -6  12 29725.3 624.349  11
   2   6 -12 30377.0 664.185  11
   2   6 -12 29160.1 613.566  10
  -2   6  12 29383.2 614.946   4
   2   6 -12 28833.4 585.355   9
  -2   6  12 28404.5 710.644   6
   2  -6 -12 28674.8 672.254   7
  -2   6  12 29419.5 768.414   5
   2  -6 -11 4054.19 154.320   2
  -2  -6  11 3993.79 149.132   2
   2   6 -11 4219.36 176.254   3
  -2   6  11 4055.90 165.037   1
   2  -6 -11 4103.46 176.743   1
  -2  -6  11 3849.55 102.470   1
  -2  -6  11 4046.58 142.092  11
   2   6 -11 3650.29 159.439  11
   2   6 -11 3951.05 140.301  10
  -2   6  11 4367.84 147.476   4
   2   6 -11 3928.64 121.024   9
   2  -6 -11 4488.62 213.514   6
   2  -6 -11 3760.00 166.641   7
  -2   6  11 4098.48 194.990   6
   2  -6 -11 3592.52 197.020   5
  -2   6  11 3754.49 215.140   5
  -2  -6  10 14246.6 342.131   2
   2  -6 -10 14701.7 353.718   2
   2   6 -10 13929.5 379.319   3
   2  -6 -10 14554.0 380.730   1
  -2  -6  10 13715.5 272.856   1
  -2   6  10 13563.0 361.229   1
   2   6 -10 13687.7 365.208  11
  -2  -6  10 14102.1 331.969  11
   2   6 -10 13396.2 335.466  10
  -2   6  10 14483.8 344.404   4
  -2  -6  10 13354.2 358.073   3
   2   6 -10 13436.1 306.754   9
   2  -6 -10 13614.2 370.918   7
  -2   6  10 14015.4 407.818   6
   2  -6 -10 14232.9 424.461   6
   2  -6 -10 13552.3 420.019   5
  -2   6  10 14381.3 454.913   5
  -2  -6   9 119.499 35.9520   3
  -2   6   9 120.010 36.9247   1
   2  -6  -9 131.709 41.1650   1
  -2  -6   9 158.273 32.7728   2
  -2  -6   9 154.246 30.7814  11
   2   6  -9 102.520 39.2552  11
   2   6  -9 135.254 34.8653  10
  -2   6   9 163.826 37.1483   4
   2   6  -9 117.415 26.1652   9
   2   6  -9 196.470 51.4021   7
  -2   6   9 160.481 51.8692   6
   2  -6  -9 164.171 44.8593   7
   2  -6  -9 131.306 57.0232   6
  -2   6   9 51.2830 52.3815   5
   2  -6  -9 166.417 51.4916   5
   2   6  -9 170.610 38.9537   5
  -2  -6   8 934.007 61.3940   2
  -2   6   8 688.187 64.3520   1
   2  -6  -8 760.655 71.7875   1
  -2  -6   8 770.514 55.0633  11
   2   6  -8 876.207 52.7645   9
  -2  -6   8 753.897 66.7064   3
   2   6  -8 813.580 81.3336   7
  -2  -6   8 876.154 64.2611   8
   2  -6  -8 851.744 71.7877   7
   2  -6  -8 761.746 86.3882   6
   2  -6  -8 770.116 87.0581   5
  -2   6   8 769.745 94.7296   5
   2   6  -8 819.976 67.6096   5
   2  -6  -7 2662.91 132.065   3
  -2  -6   7 3042.57 111.743   2
  -2  -6   7 2903.68 109.195  11
  -2  -6   7 2951.92 133.562   3
  -2   6   7 2967.02 126.629   1
  -2  -6   7 3156.50 123.030   8
   2  -6  -7 3302.52 169.834   6
   2  -6  -7 2943.66 133.695   7
   2   6  -7 3123.85 150.364   7
   2   6  -7 2858.56 128.158   5
   2  -6  -7 3051.85 159.136   5
  -2   6   7 3150.85 182.108   5
   2  -6  -6 26023.1 630.029   3
  -2  -6   6 28518.0 584.159   2
   2   6  -6 28880.9 646.557   3
  -2  -6   6 28669.6 635.170   3
  -2  -6   6 29125.4 592.162  11
  -2   6   6 28634.0 612.135   1
   2  -6  -6 28329.1 628.468   7
   2   6  -6 31936.3 663.072   7
   2  -6  -6 28932.2 687.149   6
  -2   6   6 29303.1 718.256   5
   2   6  -6 27515.9 623.533   5
   2  -6  -6 27783.9 671.405   5
  -2  -6   5 24376.6 503.234   2
   2   6  -5 25664.6 570.164   3
  -2  -6   5 24368.1 515.963  11
  -2  -6   5 24315.5 556.847   3
  -2   6   5 24107.4 527.178   1
   2  -6  -5 24924.2 603.767   6
   2   6  -5 25788.9 575.250   7
   2  -6  -5 23473.3 546.695   7
   2  -6  -5 24552.6 591.941   5
   2   6  -5 23738.4 549.247   5
  -2   6   5 24636.3 631.410   5
  -2  -6   4 73840.5 1386.50   2
   2   6  -4 75156.4 1460.60   3
  -2  -6   4 73133.2 1410.05  11
  -2  -6   4 71914.2 1447.22   3
  -2   6   4 72440.7 1470.78   8
   2   6  -4 72601.2 1405.99   8
  -2   6   4 72454.3 1523.94   5
   2  -6  -4 73868.0 1485.79   5
   2   6  -4 73048.1 1447.29   5
   2  -6  -4 74458.6 1500.11   6
   2  -6  -4 72965.5 1439.37   7
   2   6  -4 77093.0 1463.80   7
  -2  -6   4 74504.5 1430.54   6
   2  -6  -4 76521.4 1432.40   1
  -2   6   4 73079.5 1412.85   1
   2   6  -3 5395.35 189.892   3
  -2  -6   3 4544.04 176.985   3
   2  -6  -3 5534.07 171.952   1
  -2   6   3 5270.91 157.699   1
  -2  -6   3 5346.14 164.942  11
   2   6  -3 5167.99 161.164   8
  -2   6   3 5371.71 197.211   8
   2  -6  -3 5422.79 212.635   6
   2  -6  -3 5337.94 180.353   7
   2   6  -3 5302.14 189.503   7
  -2  -6   3 5308.62 175.671   6
   2   6  -3 5461.10 190.211   5
  -2   6   3 5413.94 227.277   5
   2  -6  -3 5323.70 201.563   5
   2   6  -2 987.722 76.2999   3
   2  -6  -2 958.837 63.2853   1
  -2   6   2 1070.63 59.5562   1
  -2  -6   2 999.000 67.1031  11
   2   6  -2 1040.73 65.6836   8
  -2   6   2 1030.51 80.0450   8
   2  -6  -2 998.764 88.8531   6
   2  -6  -2 1143.87 76.3333   7
   2   6  -2 1022.37 78.1915   7
  -2  -6   2 1002.12 71.2842   6
  -2   6   2 998.721 95.5968   5
   2   6  -2 958.472 77.4074   5
   2   6  -1 7928.24 241.721   3
   2  -6  -1 7663.02 244.045   3
   2  -6  -1 7724.00 210.939   1
  -2  -6   1 7698.55 223.030  11
   2  -6  -1 7975.52 255.728  11
   2   6  -1 7809.98 219.917   8
   2  -6  -1 7152.58 222.214   7
  -2   6   1 8469.17 250.768   8
   2  -6  -1 8328.38 266.372   6
  -2  -6   1 8230.04 236.183   6
   2   6  -1 8152.24 242.920   7
   2   6  -1 7646.17 247.093   5
  -2   6   1 7682.78 272.158   5
   2  -6   0 70867.8 1420.24   3
   2   6   0 73639.7 1414.05   3
   2  -6   0 72674.5 1364.19   1
   2   6   0 69055.9 1318.01   1
   2  -6   0 70170.6 1424.66  11
  -2  -6   0 72661.4 1395.72  11
   2   6   0 70956.0 1386.98   8
  -2   6   0 73913.6 1415.58   8
  -2  -6   0 70807.9 1412.28   7
   2   6   0 73746.1 1413.12   7
   2  -6   0 72931.8 1442.71   6
  -2  -6   0 72392.6 1406.64   6
   2   6   0 73431.4 1434.67   5
  -2   6   0 70800.8 1458.97   5
  -2  -6   0 71744.8 1392.50   5
   2  -6   1 18187.1 443.805   3
   2   6   1 17728.2 363.652   1
   2  -6   1 18348.8 390.723   1
   2  -6   1 17734.0 441.097  11
  -2  -6  -1 17869.1 438.486   7
   2   6   1 17352.9 418.867   8
  -2   6  -1 17379.0 428.530   8
   2   6   1 18529.8 436.353   7
   2   6   1 17783.4 456.811   5
  -2   6  -1 16751.0 460.993   5
  -2  -6  -1 17902.4 424.688   5
   2  -6   2 182014. 3430.44   3
  -2  -6  -2 185932. 3419.30   3
   2   6   2 178741. 3350.28   1
   2  -6   2 187598. 3362.00   1
   2  -6   2 181217. 3426.25  11
   2   6   2 180024. 3413.16   8
  -2   6  -2 185517. 3417.56   8
   2   6   2 188346. 3424.40   7
  -2  -6  -2 185571. 3430.08   7
  -2   6  -2 175020. 3458.81   5
   2   6   2 185069. 3459.38   5
  -2  -6  -2 185247. 3424.46   5
  -2  -6  -3 17548.3 411.815   3
   2  -6   3 16615.7 416.124   3
   2  -6   3 16719.8 411.192  11
   2   6   3 16428.3 361.451   1
   2  -6   3 16593.3 360.213   1
  -2   6  -3 16206.0 401.908   8
   2   6   3 16967.6 413.607   7
  -2  -6  -3 16064.4 414.036   7
   2   6   3 16234.8 442.698   5
  -2  -6  -3 17006.9 419.475   5
  -2   6  -3 16183.1 433.008   5
   2  -6   4 15844.9 399.876   3
  -2  -6  -4 15790.0 388.574   3
   2  -6   4 15894.5 390.119  11
   2   6   4 16120.7 412.142   4
   2  -6   4 15889.0 339.461   1
   2   6   4 14516.9 349.421   1
  -2   6  -4 15097.1 381.771   8
   2  -6   4 16303.2 406.760   8
   2   6   4 15594.4 395.098   7
  -2  -6  -4 15234.5 398.149   7
  -2  -6  -4 15911.7 408.168   5
   2   6   4 15962.1 435.321   5
  -2   6  -4 15945.4 418.832   5
   2  -6   5 3649.13 151.664   3
  -2  -6  -5 3313.46 101.559   2
  -2  -6  -5 3386.68 140.903   3
   2  -6   5 3449.44 109.157   1
   2   6   5 3403.48 123.921   1
   2  -6   5 3242.06 137.536  11
   2   6   5 3698.01 158.331   4
   2  -6   5 3658.71 155.824   8
   2   6   5 3325.21 146.745   7
   2   6   5 3514.08 156.060   6
  -2  -6  -5 3612.82 154.670   7
  -2  -6  -5 3788.08 163.002   6
  -2   6  -5 3432.19 159.011   5
   2   6   5 3390.26 172.027   5
  -2  -6  -5 3435.82 159.093   5
  -2  -6  -6 4248.19 121.718   2
  -2  -6  -6 4466.90 164.992   3
   2  -6   6 4318.52 168.150   3
   2   6   6 4084.49 145.310   1
   2  -6   6 4307.15 127.238   1
   2  -6   6 4099.70 156.262  11
  -2   6  -6 4206.53 165.448  10
   2   6   6 4621.70 178.604   4
   2  -6   6 4480.57 175.495   8
   2   6   6 4292.39 171.926   7
  -2   6  -6 4705.18 166.090   7
   2   6   6 4253.10 179.640   6
  -2  -6  -6 4215.45 172.484   7
  -2  -6  -6 4301.70 185.898   5
  -2   6  -6 4250.06 178.456   5
   2   6   6 4125.50 196.286   5
   2  -6   7 6606.68 222.320   3
  -2   6  -7 6926.49 223.769   3
  -2  -6  -7 6816.12 218.303   3
  -2  -6  -7 6775.21 173.280   2
   2  -6   7 6666.95 175.053   1
   2   6   7 6925.84 207.768   1
   2  -6   7 6673.68 210.091  11
  -2   6  -7 7025.32 244.353  11
  -2   6  -7 6693.86 221.117  10
   2   6   7 6644.42 225.105   4
  -2   6  -7 7202.26 223.374   7
   2  -6   7 6790.76 228.834   8
   2   6   7 6770.65 240.895   6
  -2  -6  -7 6647.24 229.746   7
   2   6   7 6806.48 262.078   5
  -2   6  -7 6413.19 231.961   5
  -2  -6  -7 6565.26 247.649   5
  -2  -6  -8 27766.1 564.527   2
  -2   6  -8 28866.1 628.923   3
  -2  -6  -8 28422.2 617.417   3
   2   6   8 27280.5 609.096   1
   2  -6   8 28128.4 610.738  11
  -2   6  -8 27900.5 653.385  11
  -2   6  -8 26703.3 620.886  10
  -2   6  -8 27315.6 531.514   9
   2   6   8 27868.6 630.702   4
   2  -6   8 27898.4 624.887   3
   2  -6   8 28409.4 637.800   8
  -2   6  -8 29531.7 629.700   7
   2   6   8 27633.5 659.067   6
  -2  -6  -8 27951.8 642.508   7
  -2  -6  -8 27045.2 671.175   5
   2   6   8 28296.0 696.378   5
  -2  -6  -9 10022.2 279.026   3
  -2  -6  -9 9686.27 239.696   2
  -2   6  -9 10258.9 291.400   3
   2   6   9 9929.16 279.792   1
  -2   6  -9 9879.21 309.843  11
   2  -6   9 9510.43 270.498  11
  -2   6  -9 10151.5 287.654  10
   2  -6   9 9834.78 284.423   3
   2   6   9 9369.13 283.995   4
   2  -6   9 10202.7 298.321   8
  -2   6  -9 9622.83 197.838   9
   2   6   9 9972.05 320.136   6
  -2  -6  -9 9906.57 301.717   7
   2   6   9 9576.97 340.175   5
  -2  -6  -9 9721.44 330.034   5
  -2   6 -10 27354.2 601.342   3
  -2  -6 -10 25585.7 582.484   3
   2  -6  10 26516.5 588.628   2
  -2  -6 -10 26400.0 545.447   2
   2   6  10 25111.5 589.459   1
   2  -6  10 25803.4 578.776  11
  -2   6 -10 27010.4 628.356  11
  -2   6 -10 25461.1 591.905  10
   2  -6  10 25675.5 590.810   3
   2   6  10 25893.6 592.590   4
   2  -6  10 26983.9 613.610   8
  -2  -6 -10 25703.5 616.074   7
   2   6  10 26307.4 643.878   6
   2   6  10 25903.5 675.958   5
  -2  -6 -10 24763.2 655.509   5
  -2   6 -11 8662.57 264.298   3
  -2  -6 -11 8398.04 251.403   3
   2  -6  11 8687.94 259.463   2
   2   6  11 8065.11 260.103   1
   2  -6  11 8267.69 249.667  11
  -2   6 -11 8735.84 288.100  11
  -2   6 -11 7865.83 253.651  10
   2   6  11 8822.63 262.545   4
   2  -6  11 8502.18 258.008   3
   2  -6  11 8608.17 272.063   8
  -2  -6 -11 8299.77 278.868   7
   2   6  11 8567.21 300.554   6
  -2  -6 -11 7897.91 309.510   5
   2   6  11 8600.97 327.010   5
  -2  -6 -12 1405.87 91.2497   3
  -2   6 -12 1476.15 97.3054   3
   2  -6  12 1238.83 90.8179   2
   2   6  12 1450.80 101.141   1
   2  -6  12 1503.79 94.5636  11
  -2   6 -12 1613.23 113.483  11
  -2   6 -12 1592.96 99.9230  10
   2  -6  12 1398.99 91.7979   3
   2   6  12 1445.00 94.2631   4
   2  -6  12 1549.40 105.953   8
  -2  -6 -12 1429.46 107.354   7
   2   6  12 1289.58 111.494   6
   2   6  12 1347.12 127.551   5
  -2  -6 -12 1279.87 122.906   5
  -2   6 -13 797.961 77.1987   3
  -2  -6 -13 690.717 66.2249   3
  -2  -6 -13 825.811 62.5207   2
   2  -6  13 808.647 74.3177   2
   2   6  13 755.025 77.7031   1
  -2   6 -13 891.548 89.0155  11
   2  -6  13 742.353 69.0257  11
  -2   6 -13 718.606 69.4509  10
   2   6  13 886.522 107.878   5
   2  -6  13 640.640 65.0978   3
   2   6  13 840.288 73.5997   4
   2  -6  13 806.466 79.5480   8
   2   6  13 829.857 93.9996   6
  -2  -6 -13 724.163 80.7484   7
  -2  -6 -13 710.552 96.9210   5
  -2  -6 -14 1479.87 91.4211   3
  -2   6 -14 1467.28 97.6390   3
   2  -6  14 1400.96 99.2928   2
  -2  -6 -14 1514.48 85.8926   2
   2   6  14 1329.86 100.736   1
  -2   6 -14 1280.87 106.144  11
   2  -6  14 1372.59 93.7639  11
  -2   6 -14 1248.36 89.5753  10
   2   6  14 1179.19 122.910   5
   2   6  14 1315.48 90.3402   4
   2  -6  14 1329.81 87.2139   3
   2  -6  14 1166.06 97.2431   8
   2   6  14 1324.66 115.921   6
  -2  -6 -14 1317.28 108.688   7
  -2  -6 -14 1241.05 125.462   5
  -2   6 -15 293.586 52.3182   3
  -2  -6 -15 375.783 48.9154   2
  -2  -6 -15 227.969 44.8734   3
   2  -6  15 295.989 54.6417   2
   2   6  15 341.257 60.7822   1
  -2   6 -15 259.747 61.0338  11
   2  -6  15 249.562 51.3868  11
  -2   6 -15 349.934 54.2723  10
   2   6  15 295.819 79.3619   5
   2   6  15 281.053 51.8815   4
   2  -6  15 282.688 58.3736   8
  -2  -6 -15 226.024 58.7231   7
  -2  -6 -15 228.931 80.2640   5
   2   6  15 257.193 66.6176   6
  -2  -6 -16 9401.33 263.254   2
   2  -6  16 8790.10 288.447   2
  -2   6 -16 9430.20 283.516   3
  -2  -6 -16 9392.24 268.111   3
   2   6  16 8074.21 292.730   1
   2  -6  16 9468.39 292.005  11
  -2   6 -16 9498.14 310.961  11
  -2   6 -16 8537.96 272.665  10
   2   6  16 9206.26 272.207   4
   2   6  16 8898.64 355.209   5
   2  -6  16 8927.74 292.935   8
   2   6  16 8603.77 331.434   6
  -2  -6 -16 8512.38 307.024   7
  -2  -6 -16 8952.51 364.854   5
  -2   6 -17 39.0048 42.5679   3
  -2  -6 -17 35.8784 33.4138   3
   2   6  17 95.4773 53.1813   1
  -2  -6 -17 42.1913 39.9766   2
   2  -6  17 43.8384 45.8052   2
   2  -6  17 26.3746 45.9297  11
  -2   6 -17 95.6456 54.6068  11
  -2   6 -17 58.4759 47.1103  10
   2   6  17 7.71677 66.8891   5
   2  -6  17 56.9075 53.6632   8
  -2  -6 -17 47.7605 49.3512   7
   2   6  17 13.3749 58.5124   6
  -2  -6 -17-16.3934 74.3239   5
  -2   6 -18 9771.86 291.215   3
  -2  -6 -18 9059.65 268.490   3
  -2  -6 -18 9527.91 276.315   2
   2  -6  18 8972.41 301.503   2
   2  -6  18 8743.33 267.729   1
   2   6  18 8597.22 311.974   1
   2  -6  18 9455.16 307.895  11
   2   6  18 9573.09 373.136  10
  -2   6 -18 9521.95 319.051  11
  -2   6 -18 8514.26 282.124  10
   2   6  18 9340.42 373.165   5
   2  -6  18 9041.54 297.480   8
   2   6  18 9483.19 357.184   6
  -2  -6 -18 8843.65 319.858   7
  -2  -6 -18 9036.02 380.491   5
  -2   6 -19 1769.26 113.490   3
   2  -6  19 1592.12 118.778   2
  -2  -6 -19 1848.10 105.954   3
  -2  -6 -19 1929.42 111.809   2
   2   6  19 1765.69 130.857   1
   2  -6  19 1850.46 108.158   1
  -2   6 -19 1782.35 132.794  11
   2   6  19 1822.11 165.660  10
   2  -6  19 1740.15 128.281  11
  -2   6 -19 1520.57 111.276  10
   2   6  19 1580.15 153.934   5
   2  -6  19 1823.01 122.194   8
   2   6  19 1799.69 156.026   6
  -2  -6 -19 1523.25 130.538   7
  -2  -6 -19 1822.26 171.206   5
  -2   6 -20 13091.0 361.274   3
  -2  -6 -20 12519.1 337.031   3
   2  -6  20 12576.0 383.820   2
  -2  -6 -20 13108.8 353.851   2
   2  -6  20 13425.0 399.002  11
  -2   6 -20 13732.0 405.179  11
   2   6  20 12729.1 454.821  10
  -2   6 -20 11118.0 355.871  10
   2  -6  20 12285.0 346.605   1
   2   6  20 12235.2 396.319   1
   2  -6  20 12349.6 368.739   8
   2   6  20 12092.1 432.830   6
  -2  -6 -20 12870.2 408.266   7
  -2  -6 -20 12516.7 475.804   5
  -2   6 -21 586.404 72.7294   3
  -2  -6 -21 703.122 75.7256   2
   2  -6  21 560.058 83.7609   2
  -2  -6 -21 642.030 66.9122   3
  -2   6 -21 607.050 91.8587  11
   2   6  21 633.589 115.879  10
  -2   6 -21 617.486 80.6831  10
   2  -6  21 587.676 70.6414   1
   2   6  21 595.560 86.6566   1
   2  -6  21 722.817 84.1606   8
  -2  -6 -21 465.444 88.7608   7
   2   6  21 502.599 96.7162   6
  -2  -6 -21 487.238 106.247   5
  -2   6 -22 1211.42 121.252  11
  -2   6 -22 1201.57 106.274  10
   2  -6  22 1381.29 107.465   8
  -2  -6 -22 1247.79 99.2531   2
  -2  -6 -22 1209.44 87.9311   3
   2  -6  22 1421.07 118.317   2
  -2   6 -22 1115.61 94.6034   3
   2   6  22 1313.02 124.288   1
   2  -6  22 1096.71 91.6677   1
   2  -6  23 34.0159 56.0922   8
  -2   6 -23 12.6407 46.5217   3
  -2  -6 -23 3.30711 40.3460   3
   2  -6  23 25.6650 47.2275   1
  -2  -6 -23-13.0034 51.8623   2
  -2   6 -24 13187.6 372.298   3
  -2  -6 -24 12662.6 340.524   3
  -2  -6 -24 13604.0 382.494   2
  -2   6 -24 12473.3 477.148   5
   2  -6  24 12537.1 372.271   1
  -2  -6 -25 2386.94 145.768   2
  -2   6 -25 2336.51 140.229   3
   2  -6  25 2109.92 135.635   1
  -2   6 -26 11627.8 346.465   3
   2  -6  26 11226.6 352.024   1
   2  -6  27 2104.48 139.977   1
   2  -8 -23 47.0561 62.5642   3
   2  -8 -22 4119.20 199.905   3
   2  -8 -22 4112.10 191.976   2
  -2  -8  22 3937.86 180.322   8
  -2  -8  21 1997.30 127.003   8
   2   8 -21 1963.85 150.178  11
   2   8 -21 1866.35 150.611   5
  -2  -8  21 1847.06 129.723   2
   2  -8 -21 1820.03 134.002   3
   2  -8 -21 1921.63 131.344   2
  -2  -8  20 6307.76 229.751   8
   2   8 -20 6388.39 261.222  11
   2  -8 -20 6144.46 250.898   3
  -2  -8  20 6332.24 242.343   2
   2  -8 -20 6556.97 240.133   2
   2   8 -19 1715.23 135.261  11
  -2  -8  19 1877.93 117.835   8
  -2  -8  19 1554.97 66.5664   1
  -2   8  19 1717.07 129.598   1
   2  -8 -19 1653.34 135.154   7
   2  -8 -19 1697.07 128.567   3
  -2  -8  19 1766.38 120.319   2
   2  -8 -19 1908.05 121.909   2
  -2  -8  18 1535.41 110.092  11
   2   8 -18 1528.63 122.886  11
  -2  -8  18 1478.53 58.1609   1
  -2   8  18 1573.68 122.056   1
  -2  -8  18 1708.60 111.798   8
   2  -8 -18 1455.68 123.259   7
   2   8 -18 1610.50 126.876   3
   2  -8 -18 1437.12 117.377   3
   2  -8 -18 1660.68 110.732   2
  -2  -8  18 1396.53 106.942   2
   2   8 -17 835.944 95.7292   3
   2  -8 -17 870.842 83.0801   2
  -2  -8  17 765.946 80.5606   2
   2  -8 -17 791.610 91.4770   3
  -2  -8  17 746.176 79.6601  11
   2   8 -17 701.312 90.9058  11
   2   8 -17 699.809 65.1188  10
  -2   8  17 956.658 97.8372   1
  -2  -8  17 740.219 34.9502   1
  -2  -8  17 836.484 82.1581   8
   2  -8 -17 527.855 85.3893   7
  -2   8  17 747.577 105.080   6
   2  -8 -17 824.976 119.082   5
   2   8 -16 7342.34 278.256   3
   2  -8 -16 7866.74 278.546   3
  -2  -8  16 7224.45 245.156   2
   2  -8 -16 7569.07 248.668   2
  -2   8  16 7025.48 263.268   1
   2   8 -16 7534.98 273.425  11
  -2  -8  16 7499.04 243.544  11
   2   8 -16 6718.53 215.334  10
  -2  -8  16 7432.76 243.257   8
   2  -8 -16 6797.55 271.642   7
  -2   8  16 6860.33 299.042   6
   2  -8 -16 7004.36 317.583   5
  -2   8  16 7337.83 353.862   5
   2  -8 -15 9225.87 314.080   3
   2  -8 -15 9813.66 289.198   2
  -2  -8  15 9648.64 288.376   2
   2   8 -15 10782.0 335.698   3
  -2   8  15 9225.43 306.530   1
   2   8 -15 10106.0 322.389  11
  -2  -8  15 10068.2 285.611  11
   2   8 -15 8984.31 261.563  10
  -2   8  15 9493.05 262.142   4
   2   8 -15 8639.43 222.669   9
  -2  -8  15 9485.88 285.505   8
   2   8 -15 10073.0 349.827   7
   2  -8 -15 9298.44 320.689   7
  -2   8  15 9960.96 411.728   5
   2   8 -15 9186.48 300.348   5
   2  -8 -15 8907.95 363.517   5
  -2  -8  14 21000.0 504.139   2
   2  -8 -14 21050.4 544.993   3
   2  -8 -14 21791.8 508.891   2
   2   8 -14 22546.2 562.345   3
  -2   8  14 20183.0 526.470   1
  -2  -8  14 22130.9 499.592  11
   2   8 -14 21027.4 540.147  11
   2   8 -14 20304.3 485.606  10
  -2   8  14 21845.2 491.489   4
   2   8 -14 19516.0 436.494   9
   2   8 -14 23257.7 590.776   7
  -2  -8  14 21272.8 506.145   8
   2  -8 -14 22032.7 559.211   7
  -2   8  14 21937.6 660.841   5
   2   8 -14 19734.3 520.250   5
   2  -8 -14 20579.1 603.980   5
   2   8 -13 16081.5 442.698   3
   2  -8 -13 15445.3 432.073   3
   2  -8 -13 15478.8 393.696   2
  -2  -8  13 14980.0 386.640   2
  -2   8  13 15195.9 414.083   1
  -2  -8  13 15358.1 380.630  11
   2   8 -13 14510.7 379.220  10
  -2   8  13 16109.5 390.562   4
   2   8 -13 14101.2 332.712   9
  -2  -8  13 15531.8 397.198   8
   2   8 -13 17702.2 479.887   7
   2  -8 -13 15158.8 433.407   7
   2  -8 -13 14871.8 479.889   5
  -2   8  13 16321.2 537.837   5
   2   8 -13 14800.6 411.733   5
   2  -8 -12 6433.50 249.061   3
  -2  -8  12 6679.11 214.971   2
   2  -8 -12 6554.97 218.934   2
   2   8 -12 6928.71 256.834   3
  -2   8  12 6005.17 226.149   1
  -2  -8  12 6698.20 209.404  11
   2   8 -12 6278.31 213.111  10
  -2   8  12 7167.94 226.014   4
  -2  -8  12 6535.98 236.182   3
   2   8 -12 6200.01 174.395   9
  -2  -8  12 6724.23 222.759   8
   2   8 -12 6983.74 276.336   7
   2  -8 -12 6360.68 246.943   7
   2  -8 -12 6419.69 285.281   5
  -2   8  12 7333.62 329.978   5
   2   8 -12 6641.98 240.553   5
   2   8 -11 9648.38 316.052   3
  -2  -8  11 9217.85 264.837   2
   2  -8 -11 9599.42 274.840   2
   2  -8 -11 9219.88 307.405   3
  -2   8  11 8956.62 282.802   1
  -2  -8  11 9508.56 260.846  11
   2   8 -11 9321.07 274.839  10
  -2   8  11 9727.50 282.978   4
  -2  -8  11 8940.77 291.553   3
  -2  -8  11 9535.79 277.599   8
   2   8 -11 8913.48 229.730   9
   2  -8 -11 10082.3 367.920   6
   2  -8 -11 8974.57 302.138   7
   2   8 -11 10205.3 336.225   7
  -2   8  11 9575.95 387.640   5
   2  -8 -11 8629.70 336.373   5
   2   8 -11 9131.84 294.756   5
   2  -8 -10 3651.07 148.640   2
   2  -8 -10 3568.44 175.042   3
  -2  -8  10 3446.19 138.764   2
  -2  -8  10 3639.88 139.244  11
   2   8 -10 3488.15 120.755   9
   2   8 -10 3411.20 150.009  10
  -2   8  10 3531.30 154.219   1
  -2  -8  10 3384.24 162.000   3
  -2   8  10 3371.98 155.914   4
   2  -8 -10 3528.93 204.905   6
   2   8 -10 3955.62 191.294   7
   2  -8 -10 3453.64 170.216   7
   2   8 -10 3581.60 166.897   5
   2  -8 -10 3356.99 191.058   5
  -2   8  10 3286.40 216.471   5
   2  -8  -9 512.126 73.0226   3
  -2  -8   9 552.504 55.9367   2
  -2   8   9 497.777 64.1195   1
  -2  -8   9 505.835 55.5110  11
   2   8  -9 486.482 48.9235   9
   2   8  -9 572.552 66.7749  10
  -2  -8   9 433.479 66.5970   3
  -2   8   9 624.407 74.0825   4
   2   8  -9 510.553 81.0213   7
   2  -8  -9 491.136 71.4958   7
  -2   8   9 511.128 99.9541   5
   2   8  -9 491.480 72.5544   5
   2  -8  -9 528.735 87.1747   5
   2  -8  -9 622.952 95.9515   6
  -2  -8   8 46563.8 948.797   2
   2  -8  -8 45946.5 1022.53   3
   2  -8  -8 49192.6 1000.16   1
  -2   8   8 46449.9 976.922   1
  -2  -8   8 48534.5 957.675  11
   2   8  -8 47105.3 940.861   9
  -2   8   8 49217.7 1015.37   4
  -2  -8   8 46204.7 1010.09   3
  -2   8   8 47370.9 1051.06   8
   2   8  -8 52574.6 1055.30   7
   2  -8  -8 46621.1 1010.91   7
   2  -8  -8 48724.0 1091.73   6
   2   8  -8 45750.3 1012.69   5
  -2   8   8 49257.1 1139.10   5
   2  -8  -8 47000.2 1065.97   5
   2  -8  -7 3018.44 160.065   3
  -2  -8   7 3269.12 123.053   2
  -2  -8   7 3180.42 129.929  11
  -2  -8   7 3247.64 158.464   3
   2  -8  -7 3264.24 146.895   1
  -2   8   7 3060.66 135.573   1
  -2   8   7 2875.17 170.027   8
   2  -8  -7 3374.94 193.860   6
   2   8  -7 3309.43 170.253   7
  -2  -8   7 3115.34 147.812   6
   2  -8  -7 3076.95 153.930   7
   2   8  -7 3261.19 162.699   5
  -2   8   7 3353.62 210.505   5
   2  -8  -7 3291.28 183.095   5
   2   8  -6 58765.8 1228.39   3
  -2  -8   6 58005.4 1136.33   2
   2  -8  -6 56817.1 1222.02   3
  -2  -8   6 59590.9 1158.47  11
  -2  -8   6 56846.0 1209.44   3
  -2   8   6 56567.4 1159.81   1
   2  -8  -6 61017.8 1186.41   1
  -2   8   6 57096.7 1241.75   8
   2  -8  -6 59863.6 1282.52   6
   2   8  -6 63485.6 1240.86   7
  -2  -8   6 58040.5 1192.28   6
   2  -8  -6 58837.9 1206.54   7
   2   8  -6 57947.2 1222.72   5
   2  -8  -6 57792.4 1250.59   5
  -2   8   6 59705.0 1321.21   5
   2   8  -5 2526.92 140.649   3
   2  -8  -5 2203.26 134.995   3
  -2  -8   5 2263.85 95.1244   2
  -2  -8   5 2422.12 111.799  11
  -2  -8   5 2259.71 129.762   3
  -2   8   5 1964.73 136.053   8
   2   8  -5 2370.68 140.695   5
   2  -8  -5 2279.38 142.369   5
  -2   8   5 2643.06 182.073   5
  -2  -8   5 2370.49 126.158   6
   2   8  -5 2569.00 142.217   7
   2  -8  -5 2337.88 157.611   6
   2  -8  -5 2371.89 130.634   7
   2  -8  -5 2391.60 119.453   1
  -2   8   5 2317.43 108.349   1
   2   8  -4 113.943 51.1765   3
  -2  -8   4 102.038 44.8636   3
  -2  -8   4 104.967 29.7170   2
  -2   8   4 110.864 34.2751   1
   2  -8  -4 120.687 63.1210  11
  -2  -8   4 111.759 40.8095  11
  -2   8   4 147.463 54.9152   8
   2   8  -4 187.784 42.2752   8
  -2  -8   4 58.5084 43.3833   6
   2  -8  -4 199.950 52.0318   7
   2   8  -4 136.161 51.2181   7
  -2   8   4 223.373 50.2652   7
  -2   8   4 184.424 71.8606   5
   2   8  -4 174.299 56.8012   5
   2  -8  -4 90.7994 51.8893   5
   2  -8  -4 213.470 62.7853   6
  -2  -8   3 202.633 31.4667   2
  -2  -8   3 152.863 38.9188  11
   2  -8  -3 112.423 54.6645  11
   2  -8  -3 132.583 45.1883   7
   2   8  -3 180.091 51.4151   7
  -2   8   3 134.458 45.7949   7
   2   8  -3 173.964 54.3459   5
  -2  -8   3 112.281 45.3113   6
   2  -8  -3 164.244 59.8064   6
  -2   8   3 138.518 64.8199   5
  -2   8   3 148.143 50.2173   8
   2   8  -3 175.105 39.8099   8
  -2  -8   2 3603.92 150.784  11
   2  -8  -2 3555.90 178.911  11
   2   8  -2 3879.88 151.956   8
  -2   8   2 3773.99 175.094   8
   2  -8  -2 4077.37 198.633   6
  -2   8   2 3929.16 161.458   7
  -2  -8   2 3989.02 168.753   6
   2   8  -2 4165.32 178.117   7
   2   8  -2 3893.84 185.452   5
  -2   8   2 4055.80 215.534   5
   2  -8  -1 221.515 40.4653   1
  -2  -8   1 247.994 48.8575  11
   2  -8  -1 179.916 55.0176  11
  -2   8   1 250.439 53.4398   8
   2   8  -1 350.620 51.5810   8
  -2   8   1 207.374 47.9518   7
   2   8  -1 182.824 49.4887   7
   2  -8  -1 201.743 65.5039   6
  -2  -8   1 203.474 50.7626   6
   2   8  -1 204.674 58.9714   5
  -2   8   1 162.377 62.3369   5
  -2  -8   0 6281.39 232.744   3
   2  -8   0 7000.98 250.342   3
   2  -8   0 6524.41 193.430   1
   2  -8   0 6728.36 247.443  11
  -2  -8   0 6800.93 227.329  11
  -2   8   0 6875.57 239.655   8
   2   8   0 6620.57 221.622   8
   2  -8   0 6401.63 258.112   6
  -2  -8   0 7212.03 243.760   6
   2   8   0 7181.17 243.334   7
  -2   8   0 6693.78 221.410   7
  -2   8   0 6945.46 284.878   5
   2   8   0 7121.44 267.835   5
   2  -8   1 5573.16 219.158   3
  -2  -8  -1 5652.77 213.733   3
   2  -8   1 5810.39 169.323   1
  -2  -8  -1 5704.88 211.065  11
   2  -8   1 5615.85 219.416  11
   2   8   1 5458.70 201.361   8
  -2   8  -1 5540.64 210.615   8
  -2  -8  -1 5831.02 219.403   6
   2  -8   1 5774.13 236.379   6
   2   8   1 5895.96 217.362   7
  -2   8  -1 5555.38 197.623   7
  -2   8  -1 5466.41 249.452   5
   2   8   1 5729.65 238.956   5
  -2  -8  -2 18357.3 469.434   3
   2  -8   2 17440.4 473.899   3
   2  -8   2 17960.9 398.248   1
   2   8   2 18021.0 380.177   1
   2  -8   2 18161.6 470.141  11
  -2  -8  -2 18709.3 469.160  11
  -2   8  -2 18023.0 459.718   8
   2   8   2 17545.9 458.492   8
  -2  -8  -2 18141.1 473.913   7
  -2   8  -2 19031.3 451.504   7
   2   8   2 19603.9 476.483   7
  -2  -8  -2 18037.7 474.165   6
   2  -8   2 18178.8 495.763   6
   2   8   2 17904.7 508.476   5
  -2   8  -2 17383.9 514.108   5
  -2  -8  -2 19413.5 467.934   5
  -2  -8  -3 4102.18 179.221   3
   2  -8   3 4211.05 186.006   3
   2  -8   3 4093.11 177.356  11
   2  -8   3 4078.89 130.598   1
   2   8   3 4164.21 128.754   1
   2   8   3 3930.64 177.070   8
  -2  -8  -3 3979.15 183.758   7
  -2   8  -3 4175.76 174.187   8
   2   8   3 4117.48 178.887   7
   2  -8   3 4290.49 197.914   6
  -2   8  -3 4451.85 172.273   7
  -2  -8  -3 4186.38 189.530   6
  -2   8  -3 4029.32 208.745   5
   2   8   3 4667.23 218.007   5
  -2  -8  -3 4024.30 178.633   5
   2  -8   4 23111.0 585.465   3
  -2  -8  -4 23178.4 576.655   3
   2  -8   4 24419.6 577.915  11
   2   8   4 25008.2 616.816   4
   2   8   4 24412.9 511.806   1
   2  -8   4 24879.3 500.991   1
   2   8   4 23575.0 586.267   8
  -2   8  -4 23752.3 568.091   8
   2   8   4 24762.3 588.452   7
  -2  -8  -4 23430.8 590.461   7
  -2  -8  -4 24699.3 603.534   6
  -2   8  -4 24986.9 565.550   7
  -2  -8  -4 24354.9 591.680   5
  -2   8  -4 23731.9 627.770   5
   2   8   4 24272.2 638.523   5
  -2  -8  -5 544.474 40.0443   2
   2  -8   5 448.551 66.3879   3
  -2  -8  -5 467.719 65.4120   3
   2   8   5 470.246 48.5221   1
   2  -8   5 474.603 39.6062   1
   2  -8   5 459.139 65.4725  11
   2   8   5 499.511 76.2157   4
   2   8   5 500.444 74.0801   8
  -2   8  -5 566.016 64.4929   7
   2   8   5 528.110 71.3370   7
  -2  -8  -5 519.206 71.2583   7
  -2  -8  -5 400.926 73.2881   6
   2   8   5 574.173 90.0998   5
  -2  -8  -5 503.954 74.5225   5
  -2   8  -5 482.699 78.8710   5
  -2  -8  -6 6964.60 242.900   3
  -2  -8  -6 6961.73 177.385   2
   2  -8   6 7167.87 254.153   3
   2  -8   6 7177.03 237.372  11
  -2   8  -6 6877.78 246.836  10
   2   8   6 7115.44 207.760   1
   2  -8   6 7046.56 178.168   1
   2   8   6 7124.06 262.151   4
  -2  -8  -6 6994.43 266.451   6
  -2  -8  -6 6773.47 252.916   7
   2   8   6 7140.46 252.593   7
  -2   8  -6 7175.10 237.168   7
  -2  -8  -6 6745.88 257.769   5
   2   8   6 6782.01 287.722   5
  -2   8  -6 6735.64 270.159   5
  -2  -8  -7 183.974 50.2472   3
   2  -8   7 122.684 47.9509   3
  -2  -8  -7 167.487 28.9484   2
   2   8   7 198.756 38.4670   1
   2  -8   7 228.620 29.9066   1
   2  -8   7 195.535 49.1340  11
  -2   8  -7 249.905 58.9235  10
   2   8   7 245.488 62.4430   4
  -2  -8  -7 163.798 51.1980   7
  -2   8  -7 262.140 54.5464   7
  -2  -8  -7 247.576 61.1600   5
   2   8   7 234.349 66.7707   5
  -2   8  -7 306.675 67.8891   5
  -2  -8  -8 12223.7 352.253   3
  -2  -8  -8 11928.8 281.123   2
   2   8   8 12213.2 322.106   1
   2  -8   8 12301.6 275.399   1
   2  -8   8 12314.0 339.459  11
  -2   8  -8 11622.3 352.179  10
   2  -8   8 12365.3 360.193   3
   2   8   8 13501.7 377.093   4
   2  -8   8 12790.6 370.394   8
  -2  -8  -8 12616.6 373.793   7
  -2   8  -8 12864.0 354.017   7
  -2  -8  -8 11301.8 376.827   5
  -2   8  -8 12114.9 386.759   5
   2   8   8 12449.7 417.943   5
  -2  -8  -9 5044.23 201.463   3
  -2  -8  -9 4896.36 148.446   2
   2   8   9 5078.62 182.415   1
   2  -8   9 4999.82 139.970   1
   2  -8   9 5233.75 192.879  11
  -2   8  -9 4950.43 204.222  10
  -2   8  -9 4849.06 128.342   9
   2  -8   9 5156.33 206.260   3
   2   8   9 5239.73 212.412   4
   2  -8   9 5410.40 218.262   8
  -2   8  -9 5750.00 213.259   7
  -2  -8  -9 4856.92 214.473   7
  -2  -8  -9 4784.64 226.809   5
  -2   8  -9 4944.27 222.530   5
   2   8   9 4891.90 249.098   5
  -2  -8 -10 41288.6 819.040   2
  -2  -8 -10 43444.0 907.481   3
   2  -8  10 41374.0 877.559   2
   2  -8  10 41178.2 803.013   1
   2   8  10 39880.5 872.899   1
   2  -8  10 42751.9 880.717  11
  -2   8 -10 39558.3 897.375  10
   2   8  10 44158.9 918.974   4
   2  -8  10 41360.1 904.799   3
   2  -8  10 43237.5 927.028   8
  -2   8 -10 39788.5 774.132   9
  -2  -8 -10 40851.3 928.213   7
  -2   8 -10 45688.2 920.209   7
  -2   8 -10 41545.8 939.189   5
   2   8  10 41974.4 1001.75   5
  -2  -8 -10 41671.6 960.737   5
   2  -8  11 1665.74 107.248   2
  -2  -8 -11 1842.63 119.593   3
   2  -8  11 1666.89 72.9362   1
   2   8  11 1752.00 109.084   1
   2  -8  11 1692.66 108.107  11
  -2   8 -11 1880.99 121.696  10
   2  -8  11 1812.21 119.992   3
   2   8  11 1697.82 118.137   4
   2  -8  11 1960.52 131.617   8
   2   8  11 1796.66 137.784   6
  -2   8 -11 1881.45 129.185   7
  -2  -8 -11 1686.38 129.013   7
  -2  -8 -11 1778.04 145.246   5
   2   8  11 1912.56 159.929   5
  -2   8 -11 1832.05 133.195   5
   2  -8  12 41528.2 906.655   2
  -2  -8 -12 42762.4 924.702   3
   2  -8  12 42025.4 831.999   1
   2   8  12 40786.1 909.084   1
   2  -8  12 43914.2 909.560  11
  -2   8 -12 43975.1 983.017  11
  -2   8 -12 40756.2 919.038  10
   2  -8  12 42037.2 923.982   3
   2   8  12 43969.3 928.943   4
  -2   8 -12 47444.8 963.109   7
   2  -8  12 43608.2 947.054   8
  -2  -8 -12 41822.6 956.703   7
   2   8  12 41155.6 977.970   6
  -2  -8 -12 40551.1 995.974   5
  -2   8 -12 43399.0 965.625   5
   2   8  12 42843.8 1035.87   5
  -2  -8 -13 64.1345 48.2992   3
   2  -8  13 63.1589 48.8678   3
   2  -8  13 34.4266 28.3862   1
   2   8  13-17.0025 42.6500   1
   2  -8  13 43.8203 44.7515   2
  -2  -8 -13 62.1839 35.4606   2
   2  -8  13 22.5571 43.1727  11
  -2   8 -13 35.3987 66.2703  11
  -2   8 -13 46.4284 45.7885  10
   2   8  13 40.2838 74.3048   5
   2   8  13 75.2646 54.3121   4
   2  -8  13 59.3445 58.8838   8
   2   8  13 75.6072 61.4063   6
  -2   8 -13 67.8949 59.1698   7
  -2  -8 -13 59.7239 59.6020   7
  -2  -8 -13 76.4400 65.1497   5
  -2   8 -13 65.5381 56.3177   5
  -2  -8 -14 136.890 52.7301   3
   2  -8  14 150.205 51.9103   3
  -2   8 -14 159.016 56.5553   3
  -2  -8 -14 173.226 39.4912   2
   2   8  14 107.880 51.6576   1
   2  -8  14 67.0897 45.5359   2
  -2   8 -14 78.0560 66.3304  11
   2  -8  14 109.799 50.3329  11
  -2   8 -14 105.417 53.1765  10
   2   8  14 150.810 57.2559   4
   2   8  14 199.389 86.8224   5
   2  -8  14 105.688 59.3582   8
   2   8  14 156.730 70.0096   6
  -2   8 -14 84.7012 54.7352   7
  -2  -8 -14 111.653 59.1178   7
  -2  -8 -14 124.099 68.4699   5
  -2  -8 -15 6220.39 194.723   2
  -2   8 -15 6308.88 240.698   3
  -2  -8 -15 6559.61 236.274   3
   2  -8  15 5882.28 227.802   2
   2   8  15 5988.00 237.191   1
  -2   8 -15 6200.04 268.487  11
   2  -8  15 6333.14 228.140  11
  -2   8 -15 5476.06 220.844  10
   2  -8  15 6046.91 226.202   3
   2   8  15 6327.63 227.010   4
   2   8  15 6374.50 308.727   5
   2  -8  15 6364.26 248.109   8
  -2  -8 -15 6049.72 257.989   7
   2   8  15 6169.10 274.860   6
  -2  -8 -15 6264.46 293.327   5
  -2  -8 -16 12944.6 330.454   2
  -2   8 -16 13485.4 386.113   3
   2  -8  16 12411.3 370.346   2
  -2  -8 -16 13568.8 376.095   3
   2  -8  16 12490.9 312.397   1
   2   8  16 12268.6 383.068   1
   2  -8  16 12588.9 368.648  11
  -2   8 -16 13944.1 429.023  11
  -2   8 -16 11823.1 359.889  10
   2   8  16 13547.6 476.332   5
   2   8  16 13085.4 363.148   4
   2  -8  16 12870.6 389.438   8
   2   8  16 12848.7 434.064   6
  -2  -8 -16 12517.9 407.684   7
  -2  -8 -16 12293.7 447.999   5
  -2   8 -17 13735.7 393.087   3
  -2  -8 -17 13507.4 342.274   2
   2  -8  17 13370.5 386.302   2
  -2  -8 -17 13577.9 379.022   3
   2  -8  17 12784.3 322.553   1
   2   8  17 12761.5 394.149   1
  -2   8 -17 13764.8 433.952  11
   2  -8  17 13259.9 381.994  11
  -2   8 -17 12273.1 367.053  10
   2   8  17 12592.7 471.756   5
   2   8  17 12947.2 362.394   4
   2  -8  17 13485.8 397.585   8
   2   8  17 12327.3 435.260   6
  -2  -8 -17 12687.7 413.298   7
  -2  -8 -17 12009.5 456.266   5
  -2  -8 -18 12100.5 348.555   3
  -2  -8 -18 11433.4 312.041   2
  -2   8 -18 11880.1 358.872   3
   2  -8  18 11438.0 354.996   2
   2  -8  18 11068.9 295.633   1
   2   8  18 11210.1 366.917   1
   2  -8  18 12121.2 362.402  11
  -2   8 -18 12648.5 404.645  11
  -2   8 -18 10478.2 332.680  10
   2   8  18 11583.0 330.414   4
   2  -8  18 11137.7 360.069   8
   2   8  18 11289.6 414.810   6
  -2  -8 -18 10890.7 432.575   5
  -2   8 -19 967.170 119.887  11
   2  -8  19 914.525 105.626  11
   2  -8  19 911.869 104.032   8
  -2   8 -19 800.760 89.6484  10
   2   8  19 978.318 107.334   1
   2  -8  19 892.190 72.1769   1
  -2   8 -19 959.769 100.625   3
  -2  -8 -19 862.542 79.7988   2
   2  -8  19 969.909 100.413   2
  -2  -8 -19 966.725 94.0543   3
   2  -8  20 16.2296 59.0336  11
  -2  -8 -20 42.1080 42.6079   2
   2  -8  20 14.9911 38.7796   1
  -2  -8 -20 51.8211 48.2334   3
   2  -8  20 31.9840 57.4728   8
  -2  -8 -21 468.144 73.7484   3
  -2  -8 -21 517.074 69.1894   2
  -2  -8 -22 4.26273 50.7506   3
  -2 -10  18-12.9230 56.8793  11
  -2 -10  18-21.3170 56.0655   2
  -2 -10  17 190.751 55.2024  11
  -2 -10  17 196.532 55.2602   2
  -2 -10  16 1158.96 98.0146  11
  -2 -10  16 1247.91 101.139   2
   2 -10 -16 1428.49 102.589   2
  -2  10  16 1251.94 108.452   1
  -2 -10  15 3900.73 165.976  11
  -2  10  15 3650.56 176.768   1
  -2 -10  15 3545.72 161.124   2
   2 -10 -15 3884.70 164.905   2
  -2  10  14 4266.72 180.107   4
  -2 -10  14 4231.06 168.224  11
   2 -10 -14 4221.71 172.260   2
  -2 -10  14 4235.83 172.279   2
  -2  10  14 3777.95 179.990   1
  -2  10  13 3983.62 183.334   1
  -2 -10  13 4782.14 174.282  11
  -2  10  13 4673.65 192.048   4
   2 -10 -13 4062.30 205.562   7
  -2 -10  13 4462.98 173.588   2
   2 -10 -13 4239.42 172.248   2
  -2  10  12 4977.95 197.905   1
  -2 -10  12 5247.31 183.443  11
   2  10 -12 4440.52 191.523  10
  -2  10  12 5203.15 208.492   4
  -2  10  12 4965.52 246.679   8
   2 -10 -12 5096.71 225.411   7
  -2 -10  12 4833.88 200.622   6
   2 -10 -12 5164.68 188.050   2
  -2 -10  12 4858.89 180.211   2
   2 -10 -11 1475.91 96.4324   2
   2 -10 -11 1453.57 125.081   3
  -2 -10  11 1512.08 92.0475   2
  -2  10  11 1455.01 103.030   1
  -2 -10  11 1484.92 92.4273  11
   2  10 -11 1318.35 104.883  10
  -2  10  11 1566.90 118.148   4
  -2  10  11 1590.82 139.653   8
   2 -10 -11 1337.17 115.249   7
  -2 -10  11 1306.99 104.383   6
   2  10 -11 1577.58 128.204   5
   2 -10 -11 1229.75 130.745   5
   2 -10 -10 76.6763 57.4824   3
   2 -10 -10 23.0960 38.2925   2
  -2  10  10 14.4288 38.1765   1
  -2 -10  10 23.3648 33.3579   2
  -2 -10  10 33.1610 36.7831  11
   2  10 -10 33.9585 50.0334  10
  -2  10  10 9.57342 54.3677   4
  -2  10  10 57.6418 59.0675   8
  -2 -10  10 59.8347 48.8100   6
   2  10 -10 46.5547 60.7989   7
   2 -10 -10 42.2884 51.5175   7
   2 -10 -10 124.312 74.5792   6
  -2  10  10 28.7440 77.3700   5
   2  10 -10 22.2242 51.2423   5
   2 -10 -10 58.6346 61.0779   5
   2 -10  -9 81.1420 56.0594   3
   2 -10  -9 3.25476 37.5707   2
  -2  10   9 6.86336 37.6689   1
  -2 -10   9 19.2273 32.8664   2
  -2 -10   9 5.96549 37.2460  11
   2  10  -9 8.76659 47.8302  10
  -2  10   9 20.2660 54.9550   4
  -2  10   9-12.5665 58.9032   8
   2  10  -9 36.7482 35.8427   9
  -2 -10   9 4.29128 47.3802   6
   2 -10  -9 5.14961 49.8089   7
   2  10  -9 51.4153 61.2139   7
   2 -10  -9 52.7263 65.8997   6
  -2  10   9 9.33750 76.2142   5
   2  10  -9 5.61862 55.5665   5
   2 -10  -9 25.1653 57.5342   5
   2 -10  -8 1646.58 131.837   3
  -2 -10   8 1737.09 92.2025   2
  -2  10   8 1791.95 103.661   1
  -2 -10   8 1908.90 102.346  11
   2  10  -8 1750.47 94.3949   9
  -2 -10   8 1772.10 124.483   3
  -2  10   8 2106.50 141.694   4
  -2  10   8 1766.19 143.730   8
   2  10  -8 1675.97 131.473   7
   2 -10  -8 1665.30 154.542   6
  -2 -10   8 1755.98 120.950   6
   2 -10  -8 1840.02 129.615   7
   2  10  -8 1637.21 132.694   5
   2 -10  -8 1840.24 145.096   5
  -2  10   8 1935.01 183.544   5
   2 -10  -7 5239.89 237.377   3
  -2 -10   7 5153.92 169.974   2
  -2 -10   7 5475.94 189.534  11
   2 -10  -7 5365.88 252.010  11
  -2  10   7 5846.93 243.467   4
  -2 -10   7 5291.17 224.619   3
  -2  10   7 5423.74 188.421   1
   2 -10  -7 5546.01 228.028   7
  -2  10   7 5753.63 256.040   8
  -2 -10   7 5716.01 220.905   6
   2  10  -7 6244.88 248.790   7
   2 -10  -7 5486.68 272.326   6
  -2  10   7 5248.79 290.266   5
   2  10  -7 5621.82 246.671   5
   2 -10  -7 5313.65 245.362   5
  -2 -10   6 7991.53 220.407   2
   2 -10  -6 8098.03 301.583   3
  -2 -10   6 7683.49 283.457   3
  -2 -10   6 8413.81 249.311  11
   2 -10  -6 8208.55 318.745  11
  -2  10   6 8115.28 309.842   8
   2 -10  -6 8061.26 284.668   7
  -2 -10   6 8195.03 278.886   6
   2 -10  -6 8103.29 331.717   6
   2  10  -6 8737.40 305.428   7
  -2  10   6 8116.73 368.208   5
   2  10  -6 8091.57 306.211   5
  -2 -10   5 6250.15 184.640   2
   2 -10  -5 6284.62 260.360   3
  -2 -10   5 6386.06 252.371   3
  -2  10   5 6354.13 266.615   8
  -2 -10   5 6446.35 215.919  11
   2 -10  -5 6427.10 275.013  11
   2 -10  -5 7146.79 303.059   6
   2  10  -5 7070.53 267.823   7
  -2 -10   5 6920.90 248.860   6
   2  10  -5 6878.19 278.124   5
  -2  10   5 6928.71 326.887   5
  -2 -10   4 21939.5 474.650   2
   2 -10  -4 22872.3 591.864   3
  -2  10   4 21756.7 585.572   8
   2 -10  -4 22285.0 598.183  11
  -2 -10   4 21863.9 520.888  11
   2 -10  -4 22286.5 625.253   6
   2  10  -4 23587.2 585.859   7
  -2 -10   4 22716.6 564.345   6
   2  10  -4 23351.0 610.687   5
  -2  10   4 22169.2 666.189   5
  -2 -10   3 13669.1 315.799   2
   2 -10  -3 13716.5 426.729  11
  -2 -10   3 13751.5 369.437  11
  -2  10   3 13566.9 416.537   8
  -2  10   3 14245.3 392.777   7
   2  10  -3 14273.5 414.726   7
  -2 -10   3 13949.5 400.934   6
   2 -10  -3 14064.7 453.222   6
  -2  10   3 14292.7 492.008   5
   2  10  -3 14228.0 442.957   5
  -2 -10   2 7.36616 48.0393  11
   2 -10  -2-27.3388 67.9666  11
  -2 -10   2 31.6364 26.7522   2
  -2  10   2 138.738 63.2850   8
   2  10  -2 36.8435 42.9836   8
  -2  10   2 67.2561 52.4923   7
   2  10  -2 44.4026 55.4172   7
   2  10  -2 19.1039 63.4348   5
  -2 -10   2 71.5535 55.0666   6
   2 -10  -2 32.5044 67.9190   6
  -2  10   2 89.1471 75.3615   5
  -2 -10   1 1192.08 60.0413   2
  -2 -10   1 1065.33 102.204   3
   2  10  -1 1209.91 94.9506   8
  -2  10   1 1114.11 109.410   8
   2 -10  -1 1165.82 111.160  11
  -2 -10   1 1286.04 97.3619  11
  -2 -10   1 1210.92 106.310   6
   2 -10  -1 1118.38 121.856   6
   2  10  -1 1234.07 107.086   7
  -2  10   1 1146.01 96.0060   7
   2  10  -1 1007.48 114.965   5
  -2  10   1 965.119 130.128   5
  -2 -10   0 11546.0 364.982   3
  -2 -10   0 11382.4 263.240   2
  -2  10   0 11551.8 362.855   8
   2  10   0 12045.7 344.808   8
  -2 -10   0 11647.2 343.673  11
   2 -10   0 11982.0 374.092  11
   2  10   0 12813.2 374.737   7
  -2 -10   0 11962.5 368.140   6
  -2  10   0 12542.8 350.401   7
   2 -10   0 12318.0 404.334   6
  -2  10   0 12088.8 436.695   5
   2  10   0 11543.7 400.330   5
  -2 -10  -1 7698.34 279.408   3
   2 -10   1 7382.39 284.035   3
  -2 -10  -1 8014.85 269.047  11
   2 -10   1 7406.76 274.632  11
  -2  10  -1 7016.37 265.753   8
   2  10   1 7967.33 265.343   8
   2  10   1 7634.78 277.717   7
  -2  10  -1 7878.73 260.726   7
   2 -10   1 7929.26 307.299   6
  -2 -10  -1 7663.91 280.592   6
   2  10   1 7446.18 311.475   5
  -2  10  -1 7148.01 324.476   5
   2 -10   2 13520.2 419.374   3
  -2 -10  -2 13967.9 414.564   3
   2 -10   2 14502.4 414.694  11
  -2 -10  -2 14683.0 410.331  11
   2 -10   2 13646.4 311.359   1
  -2  10  -2 14402.7 407.696   8
   2  10   2 14684.7 405.812   8
   2  10   2 14851.6 419.374   7
   2 -10   2 14328.0 449.164   6
  -2 -10  -2 14336.2 425.073   6
  -2  10  -2 14493.5 394.211   7
  -2  10  -2 14210.9 479.424   5
   2  10   2 15021.5 473.857   5
  -2 -10  -3 6038.31 155.280   2
  -2 -10  -3 6081.84 245.063   3
   2 -10   3 6270.16 253.265   3
   2 -10   3 6347.95 241.423  11
  -2 -10  -3 6236.56 242.843  11
   2  10   3 6618.96 281.759   4
   2 -10   3 5840.15 154.566   1
   2  10   3 6104.94 238.864   8
  -2  10  -3 6218.93 238.330   8
   2 -10   3 6388.08 270.288   6
  -2 -10  -3 6083.91 253.633   6
   2  10   3 6471.13 252.034   7
  -2  10  -3 6486.64 231.641   7
  -2  10  -3 5824.68 285.624   5
   2  10   3 6392.30 288.249   5
  -2 -10  -4 2510.69 149.708   3
  -2 -10  -4 2520.82 83.1476   2
   2 -10   4 2162.51 145.619   3
  -2 -10  -4 2442.49 150.647  11
   2 -10   4 2430.91 141.662  11
   2  10   4 2525.24 170.465   4
   2 -10   4 2165.59 74.5588   1
   2  10   4 2310.78 144.431   8
   2 -10   4 2278.55 161.279   6
   2  10   4 2468.21 152.076   7
  -2 -10  -4 2727.06 164.773   6
  -2  10  -4 2598.70 142.573   7
   2  10   4 2494.72 183.774   5
  -2  10  -4 2363.80 178.611   5
  -2 -10  -5 90.4156 53.8504   3
  -2 -10  -5 145.073 25.0352   2
   2 -10   5 69.8882 54.7130   3
   2  10   5 55.3436 31.1088   1
   2 -10   5 82.1677 45.2128  11
  -2 -10  -5 72.2899 56.3697  11
   2  10   5 68.2583 65.2701   4
   2  10   5 103.101 55.9411   8
  -2 -10  -5 66.2487 50.0864   7
  -2  10  -5 110.645 55.0637   7
   2 -10   5 76.4498 62.2538   6
   2  10   5 101.426 61.5966   7
  -2 -10  -5 81.6803 57.7246   6
  -2  10  -5 50.1179 69.7939   5
   2  10   5 128.276 80.8708   5
  -2 -10  -5 139.849 59.4889   5
  -2 -10  -6 1259.18 110.859   3
  -2 -10  -6 1280.59 57.7510   2
   2  10   6 1314.14 75.9534   1
   2 -10   6 1236.38 101.437  11
  -2  10  -6 1265.51 113.453  10
   2 -10   6 1150.68 107.756   3
   2  10   6 1325.65 125.080   4
  -2 -10  -6 1336.85 118.489   7
   2  10   6 1241.16 112.161   8
   2 -10   6 1339.41 121.293   6
  -2  10  -6 1261.66 104.465   7
  -2  10  -6 1206.12 132.334   5
  -2 -10  -6 1360.20 119.920   5
   2  10   6 1469.56 147.611   5
  -2 -10  -7 6117.32 158.192   2
  -2 -10  -7 6147.92 246.890   3
   2  10   7 6037.37 192.462   1
   2 -10   7 6493.14 233.961  11
  -2  10  -7 6150.05 247.725  10
   2 -10   7 6085.31 249.577   3
   2  10   7 6397.94 265.459   4
   2  10   7 6334.19 259.469   8
  -2 -10  -7 6531.04 266.067   7
  -2  10  -7 6965.90 245.761   7
   2 -10   7 6097.03 260.667   6
  -2 -10  -7 6096.84 255.986   5
   2  10   7 6647.20 303.753   5
  -2  10  -7 6158.05 282.177   5
   2 -10   8 4627.25 180.620   2
  -2 -10  -8 4627.28 130.909   2
  -2 -10  -8 4736.67 212.909   3
   2  10   8 4576.90 167.492   1
   2 -10   8 4966.36 198.422  11
  -2  10  -8 4667.18 213.427  10
   2 -10   8 4770.70 215.697   3
   2  10   8 5040.09 228.855   4
   2  10   8 4122.52 215.611   8
  -2 -10  -8 4885.18 226.630   7
  -2  10  -8 5164.48 209.377   7
  -2  10  -8 4944.01 245.495   5
   2  10   8 5013.88 265.154   5
  -2 -10  -8 4933.86 228.232   5
  -2 -10  -9 5832.19 158.439   2
  -2 -10  -9 5940.71 243.604   3
   2 -10   9 5854.97 212.109   2
   2  10   9 5807.51 200.942   1
   2 -10   9 6145.95 224.469  11
  -2  10  -9 5563.97 238.605  10
   2 -10   9 5914.90 244.944   3
   2  10   9 6806.50 265.932   4
   2  10   9 5764.45 256.526   8
  -2 -10  -9 6062.84 257.782   7
  -2  10  -9 6588.34 243.032   7
  -2  10  -9 6567.62 284.579   5
   2  10   9 6159.14 303.261   5
  -2 -10  -9 6145.63 264.786   5
  -2 -10 -10 6695.92 258.377   3
   2 -10  10 6155.83 222.700   2
  -2 -10 -10 6234.89 169.717   2
   2  10  10 6109.88 214.489   1
   2 -10  10 6947.25 237.940  11
  -2  10 -10 6065.51 251.473  10
   2  10  10 6919.71 268.890   4
   2  10  10 6709.33 279.612   8
  -2  10 -10 7461.18 263.267   7
  -2 -10 -10 6549.49 272.796   7
   2  10  10 6807.54 324.119   5
  -2 -10 -10 6784.71 281.944   5
  -2  10 -10 6294.65 283.748   5
  -2 -10 -11 2741.03 158.489   3
   2 -10  11 2495.60 134.722   2
   2 -10  11 2607.95 139.940  11
  -2  10 -11 2229.83 145.568  10
   2  10  11 2250.11 126.266   1
   2  10  11 2786.17 165.086   4
  -2  10 -11 2988.12 165.126   7
  -2 -10 -11 2409.90 170.472   5
  -2  10 -11 2790.78 184.242   5
   2  10  11 2468.39 200.784   5
  -2 -10 -12 690.762 91.6914   3
   2 -10  12 670.720 78.5415  11
  -2  10 -12 567.786 86.0182  10
   2  10  12 588.855 72.5871   1
   2 -10  12 523.977 73.1185   2
   2  10  12 646.263 88.6868   4
   2  10  12 665.541 120.695   5
  -2  10 -12 595.799 89.5733   7
  -2 -10 -12 660.887 105.869   5
  -2  10 -12 584.960 100.265   5
  -2 -10 -13 380.977 74.4578   3
   2 -10  13 440.336 73.2702  11
  -2  10 -13 427.536 76.8905  10
   2 -10  13 479.430 71.6678   2
   2  10  13 456.243 69.3809   1
   2  10  13 420.813 81.0475   4
  -2  10 -13 489.101 83.8878   7
  -2 -10 -13 316.028 82.2800   5
  -2  10 -13 405.312 92.3692   5
   2 -10  14 131.120 54.8601   2
   2  10  14 109.783 53.0985   1
   2 -10  14 125.275 56.3755  11
  -2  10 -14 102.530 60.4420  10
   2  10  14 149.801 63.0549   4
  -2 -10 -14 71.8703 54.3611   3
  -2  10 -14 102.318 73.5669   5
   2 -10  15 1410.34 110.845  11
   2  10  15 1260.78 112.384   4
   2 -10  15 1306.47 123.790   8
  -2  10 -15 1323.90 137.932   5
   2  10  15 1048.34 99.9160   1
  -2 -10 -15 1237.99 111.482   3
   2 -10  15 1105.79 100.676   2
   2  10  16 680.545 89.4687   1
  -2 -10 -16 723.802 94.0055   3
   2 -10  16 607.843 96.6964   8
   2  10  17 1288.27 115.822   1
  -2 -12   5 6705.42 226.201  11
  -2 -12   4 222.322 61.8000  11
  -2 -12   3-15.0719 57.2743  11
  -2 -12   2 82.3416 54.2601  11
  -2 -12   1 2216.96 131.326  11
  -2 -12   1 2072.32 150.184   6
  -2 -12   0 223.932 80.3726   6
  -2 -12   0 156.526 64.9449  11
  -2 -12  -1 4734.62 204.262  11
  -2 -12  -1 4430.44 222.771   6
  -2 -12  -2 550.993 87.9540  11
  -2 -12  -2 517.499 96.0964   6
  -2 -12  -3 8581.39 302.776  11
  -2 -12  -4 2825.01 168.328  11
  -2 -12  -5 4237.36 208.694  11
  -2 -12  -6 56.1847 66.5638  11
  -3  -1  31 3200.23 140.910   9
   3   1 -30 2282.50 136.943   3
  -3  -1  30 2418.77 120.639   9
  -3  -1  29 74.7112 52.2905   9
  -3   1  29 58.3024 57.8052   9
  -3   1  29 56.9270 58.3974  10
   3   1 -29 24.4562 48.5368   3
  -3  -1  28 9435.39 257.755  10
  -3   1  28 9388.55 289.662  10
   3   1 -28 9950.45 296.286   3
  -3   1  28 9189.52 287.472   9
  -3  -1  28 9251.25 267.780   9
  -3  -1  28 8744.90 352.938   6
   3   1 -28 8796.11 401.836   5
   3  -1 -27 88.5152 88.4310   5
  -3  -1  27 20.6137 71.3524   6
  -3   1  27 136.969 76.7981   6
   3   1 -27 84.4232 88.6708   5
  -3  -1  27 103.659 48.6391  10
  -3   1  27 203.491 62.3820  10
  -3   1  27 76.2725 57.8328   9
  -3  -1  27 183.549 50.4586   9
   3   1 -27 119.469 52.5625   3
  -3  -1  27 180.347 74.4494   1
  -3  -1  26 5832.43 244.162   2
  -3  -1  26 5043.98 233.853   1
  -3   1  26 5623.68 249.149   1
   3  -1 -26 6155.11 264.326  11
   3   1 -26 6101.43 244.964  11
  -3   1  26 6086.26 218.220  10
  -3  -1  26 5981.13 185.405  10
   3   1 -26 6305.48 215.069   3
  -3   1  26 5612.95 209.421   9
  -3  -1  26 5458.98 190.097   9
  -3  -1  26 5380.06 258.834   6
  -3   1  26 5447.29 265.832   6
   3   1 -26 5521.44 301.337   5
   3  -1 -26 6065.94 317.057   5
   3   1 -25 7249.29 277.260   2
   3  -1 -25 7295.45 275.544   2
  -3  -1  25 6507.37 264.328   2
  -3   1  25 7411.47 285.276   1
  -3  -1  25 7647.01 280.748   1
   3   1 -25 7578.06 271.565  11
   3  -1 -25 7700.98 299.657  11
  -3  -1  25 7458.35 211.509  10
  -3   1  25 7201.04 245.078  10
   3  -1 -25 6299.70 191.679   4
   3   1 -25 7367.26 237.476   3
  -3   1  25 7081.41 238.868   9
  -3  -1  25 7347.97 221.476   9
  -3   1  25 7429.12 305.980   6
  -3  -1  25 6913.95 291.852   6
   3  -1 -25 7239.59 342.770   5
   3   1 -25 7170.85 335.181   5
   3   1 -24 995.498 98.2765   2
  -3  -1  24 860.493 91.2708   2
  -3   1  24 879.967 96.9575   1
  -3  -1  24 730.628 91.3185   1
   3   1 -24 829.905 88.8097  11
   3  -1 -24 894.033 103.326  11
  -3  -1  24 926.648 65.8352  10
  -3   1  24 937.924 83.3756  10
   3  -1 -24 657.999 55.5129   4
   3   1 -24 962.510 79.3244   3
  -3   1  24 958.854 81.8082   9
  -3  -1  24 961.797 72.8530   9
  -3   1  24 806.415 104.176   6
   3   1 -24 1046.69 128.503   5
   3  -1 -24 804.685 120.196   5
   3   1 -23 1227.52 104.876   2
  -3  -1  23 932.854 95.5587   2
  -3   1  23 1256.45 109.827   1
  -3  -1  23 1187.56 104.739   1
   3   1 -23 1253.43 105.349  11
   3  -1 -23 1233.39 118.625  11
  -3   1  23 1374.81 99.5597  10
   3  -1 -23 1040.25 66.1455   4
  -3  -1  23 1200.88 82.3905   9
  -3   1  23 1096.81 85.6709   9
  -3   1  23 1354.66 123.716   6
   3   1 -23 1369.58 137.301   5
   3  -1 -23 1216.43 137.119   5
   3   1 -22 27048.5 636.142   2
  -3  -1  22 23743.9 614.014   2
  -3   1  22 26009.9 639.708   1
  -3  -1  22 26457.7 629.784   1
   3  -1 -22 26215.4 658.976  11
   3   1 -22 26235.7 624.637  11
  -3   1  22 27119.3 604.642  10
   3  -1 -22 23734.0 534.461   4
  -3   1  22 25350.0 589.465   9
  -3  -1  22 26203.9 565.060   9
  -3   1  22 26485.1 670.476   6
   3  -1 -22 25701.1 722.679   5
   3   1 -22 26054.9 710.283   5
   3   1 -21 3911.65 181.231   2
  -3  -1  21 3716.68 174.479   1
  -3   1  21 3694.91 181.868   1
   3  -1 -21 4126.05 201.093  11
   3   1 -21 3872.16 177.111  11
  -3   1  21 3655.06 166.530  10
   3  -1 -21 3235.02 122.492   4
  -3   1  21 3552.27 156.028   9
  -3  -1  21 3685.52 142.952   9
  -3   1  21 3690.72 197.575   6
   3  -1 -21 3756.03 226.633   5
   3   1 -21 3562.71 212.301   5
   3   1 -20 52268.4 1063.29   2
  -3  -1  20 49416.5 1050.40   1
  -3   1  20 49742.6 1067.44   1
   3   1 -20 51214.6 1054.51  11
  -3  -1  20 52241.8 977.266  10
  -3   1  20 50821.7 1036.78  10
  -3  -1  20 49631.9 989.807   9
  -3   1  20 49803.9 1095.51   6
   3   1 -20 49781.1 1136.72   5
   3  -1 -20 49342.0 1154.33   5
   3   1 -19 427.744 64.7260  11
  -3   1  19 351.863 61.3760  10
  -3  -1  19 348.165 45.0127  10
   3  -1 -19 287.524 37.3422   4
  -3  -1  19 319.888 46.8951   9
  -3   1  19 322.660 67.2784   6
   3  -1 -19 282.657 77.6570   5
   3   1 -19 395.273 78.3691   5
  -3   1  19 254.515 61.8770   1
  -3  -1  19 427.574 62.1285   1
   3   1 -19 278.097 58.9750   2
   3   1 -18 19986.5 481.756   2
  -3  -1  18 18774.0 470.023   1
   3   1 -18 19149.7 473.672  11
  -3  -1  18 19754.1 411.227  10
   3  -1 -18 17532.4 397.957   4
  -3  -1  18 18611.6 421.997   9
  -3   1  18 18432.4 500.177   6
   3  -1 -18 18696.9 545.741   5
   3   1 -18 18966.8 533.820   5
   3   1 -17 5257.06 195.654   2
  -3  -1  17 5201.18 194.089   1
   3   1 -17 5326.06 195.568  11
  -3  -1  17 5367.63 152.172  10
   3  -1 -17 4866.64 142.639   4
  -3  -1  17 5238.05 162.752   9
  -3   1  17 5333.15 216.444   6
   3   1 -17 4939.50 225.211   5
   3  -1 -17 5267.62 244.064   5
   3   1 -16 7839.94 244.739   2
  -3  -1  16 7747.55 240.294   1
   3   1 -16 7674.67 241.932  11
  -3  -1  16 7632.06 193.179  10
   3  -1 -16 6793.91 181.954   4
  -3   1  16 7498.24 278.883   5
  -3  -1  16 7663.66 207.224   9
  -3   1  16 7990.76 267.776   6
   3  -1 -16 7805.71 295.943   5
   3   1 -16 7460.66 278.184   5
   3   1 -15 5941.94 202.435   2
  -3  -1  15 6156.60 201.657   1
  -3   1  15 6159.70 204.929  10
   3   1 -15 5763.39 200.746  11
  -3  -1  15 6206.99 161.365  10
  -3   1  15 6088.60 241.285   5
   3  -1 -15 5659.66 150.720   4
  -3  -1  15 6084.28 174.439   9
  -3   1  15 6209.18 224.900   6
   3  -1 -15 5825.36 246.667   5
   3   1 -15 5734.88 232.526   5
   3   1 -14 62328.6 1246.44   2
  -3  -1  14 62431.1 1239.33   1
   3   1 -14 62090.1 1245.02  11
  -3  -1  14 64961.6 1183.70  10
  -3   1  14 63941.2 1310.25   5
  -3  -1  14 61921.5 1200.85   9
  -3   1  14 60178.5 1272.48   6
   3   1 -14 61329.3 1296.24   5
   3  -1 -14 61195.1 1317.27   5
   3   1 -13 22.3526 31.3871  11
  -3  -1  13 31.9372 19.7797  10
   3   1 -13 40.7144 40.2685   5
  -3  -1  13 14.3339 23.4714   9
   3  -1 -13 32.9014 28.7900   1
   3   1 -13 22.6147 27.1393   2
  -3  -1  13 67.7528 30.6147   1
  -3   1  13 14.4946 35.3173   6
   3  -1 -13 46.7665 44.8928   5
   3   1 -12 83839.4 1644.07  11
  -3  -1  12 87834.8 1588.44  10
  -3  -1  12 86672.8 1641.85   1
   3  -1 -12 84373.1 1664.57   1
  -3  -1  12 85090.8 1608.86   9
   3   1 -12 85692.6 1646.85   2
   3  -1 -12 83651.5 1708.65   5
   3   1 -12 85580.3 1687.38   5
   3   1 -11 16749.4 396.323  11
  -3  -1  11 18051.9 349.056  10
  -3  -1  11 16961.5 393.290   1
  -3  -1  11 17161.5 369.305   9
   3   1 -11 16761.2 395.946   2
   3   1 -11 16974.7 424.983   5
   3  -1 -11 16333.7 440.699   5
   3   1 -10 24312.8 522.382  11
  -3  -1  10 25960.8 474.569  10
  -3  -1  10 23296.8 517.133   1
   3   1 -10 23489.3 518.530   1
  -3  -1  10 24257.7 496.320   9
   3   1 -10 24646.6 525.087   2
   3   1 -10 23800.2 547.146   5
   3  -1 -10 24106.1 572.894   5
   3   1  -9 548.362 43.4493  11
   3  -1  -9 563.693 57.9685   5
   3   1  -9 566.247 51.5136   5
  -3  -1   9 544.783 36.5229   9
  -3   1   9 428.679 42.9582   1
  -3  -1   9 566.556 43.1935   1
   3   1  -9 546.973 43.4160   1
   3   1  -9 552.585 44.5897   2
  -3  -1   8 7531.61 188.006   9
   3   1  -8 7890.47 201.200   9
   3   1  -8 7647.09 216.041   5
   3  -1  -8 7819.57 235.337   5
   3   1  -8 7777.95 205.634   2
   3   1  -8 7929.14 204.840   1
  -3  -1   8 8179.75 202.899   1
  -3   1   8 7664.54 212.589   1
  -3  -1   7 5543.56 148.310   1
  -3   1   7 5681.32 161.410   1
   3   1  -7 5580.47 151.558   1
   3   1  -7 5676.05 148.187   9
   3   1  -7 5491.62 159.328   5
   3  -1  -7 5637.65 180.478   5
   3  -1  -7 5702.21 175.302   6
   3   1  -7 5456.33 152.234   2
  -3  -1   6 30067.4 607.407   1
  -3   1   6 31870.0 625.431   1
   3   1  -6 30986.2 609.658   1
   3   1  -6 31048.0 608.187   9
   3  -1  -6 31254.6 647.164   5
   3   1  -6 31347.3 618.764   5
   3  -1  -6 31061.7 640.647   6
   3   1  -6 31881.0 615.185   2
   3   1  -5 145131. 2662.57   1
  -3   1   5 148047. 2678.34   1
   3  -1  -5 147485. 2701.11   5
   3   1  -5 143816. 2665.22   5
   3   1  -5 143581. 2664.43   9
   3  -1  -5 147404. 2695.75   6
   3   1  -5 146867. 2667.13   2
   3   1  -4 186064. 3353.58   1
  -3   1   4 191387. 3370.48   1
  -3  -1   4 187522. 3349.30   5
   3   1  -4 183061. 3357.87   9
   3   1  -4 178253. 3349.14   5
   3  -1  -4 190438. 3389.36   5
  -3  -1   4 180449. 3342.44   6
   3  -1  -4 189611. 3384.96   6
   3   1  -4 184070. 3357.69   2
   3   1  -3 102904. 1919.20   1
  -3   1   3 105022. 1933.35   1
   3  -1  -3 105632. 1949.98   5
  -3   1   3 104951. 1932.48   9
   3   1  -3 107314. 1927.57   9
   3  -1  -3 104965. 1947.34   6
   3   1  -3 105654. 1921.87   2
   3   1  -2 16114.3 304.941  10
   3   1  -2 14973.1 325.020   4
  -3   1   2 16246.8 317.686   9
   3  -1  -2 15254.7 331.848   5
  -3   1   2 15416.7 319.205   1
   3   1  -2 15520.2 306.197   1
   3   1  -1 7993.86 165.276  10
  -3  -1   1 7095.72 175.382   4
  -3   1   1 7838.12 162.409   9
   3   1  -1 7387.26 167.392   7
   3  -1  -1 7695.69 176.306   5
   3   1   0 17035.8 332.665  10
  -3   1   0 16732.1 334.351  10
  -3  -1   0 16742.1 339.339   4
   3   1   0 16004.1 315.523   3
  -3   1   0 15975.0 314.373   9
  -3   1   0 15993.2 331.622   8
   3   1   0 15796.7 325.112   7
   3  -1   0 15660.1 333.357  11
  -3   1  -1 14381.1 297.422  10
   3   1   1 14117.6 299.806  10
  -3  -1  -1 13927.9 299.205   4
   3   1   1 13357.5 272.243   3
  -3   1  -1 13898.2 291.505   8
  -3   1  -1 14332.4 271.777   9
   3   1   1 14171.6 287.409   7
   3  -1   1 13745.4 292.129  11
   3  -1   2 78791.9 1506.25  11
  -3  -1  -2 85344.3 1520.11   4
   3   1   2 84288.3 1525.32  10
  -3   1  -2 82186.0 1517.36  10
  -3   1  -2 80558.5 1482.15   9
   3   1   2 81765.2 1504.46   7
   3   1   2 80876.0 1483.62   3
  -3  -1  -3 11840.5 255.827   4
  -3  -1  -3 11007.2 214.529   3
   3  -1   3 10758.9 241.648  11
  -3  -1  -3 11627.8 271.508  10
   3   1   3 10885.7 217.138   3
   3  -1   3 10884.3 225.431   3
   3  -1   3 11504.0 216.933   9
  -3   1  -3 11058.0 253.942  10
  -3  -1  -4 86775.6 1543.00   4
  -3  -1  -4 81186.6 1490.42   3
  -3  -1  -4 88474.2 1573.37  10
   3  -1   4 82967.3 1527.27  11
   3   1   4 78104.5 1510.16   2
   3  -1   4 82791.3 1505.49   3
  -3   1  -4 84548.7 1545.85  10
  -3  -1  -5 162391. 2873.26   4
   3  -1   5 156275. 2859.53  11
   3  -1   5 152306. 2829.89   3
   3   1   5 156093. 2844.96   2
  -3   1  -5 158608. 2878.94  10
  -3  -1  -6 18600.5 386.706   4
   3  -1   6 17018.3 340.049   3
   3  -1   6 17840.0 374.537  11
  -3  -1  -6 17304.3 327.340   3
  -3   1  -6 17751.6 343.181   3
   3   1   6 17523.7 361.245   2
  -3   1  -6 17413.0 392.734  10
   3  -1   7 3485.79 86.9339   3
  -3  -1  -7 3742.92 124.567   4
   3  -1   7 3640.24 118.594  11
   3   1   7 3593.77 108.958   2
  -3   1  -7 3531.81 91.3483   3
  -3   1  -7 3468.88 127.952  10
  -3  -1  -8 6583.38 184.779   4
   3  -1   8 6239.02 180.310  11
   3   1   8 6343.42 168.206   2
   3  -1   8 6300.56 177.243   2
  -3   1  -8 6256.65 144.147   3
  -3   1  -8 6089.33 193.359  10
   3  -1   8 6131.46 178.168  10
  -3  -1  -9 15086.2 355.356   4
   3  -1   9 15234.1 358.141  11
   3   1   9 14778.9 338.319   2
   3  -1   9 15186.1 348.948   2
  -3   1  -9 15053.9 307.217   3
   3  -1   9 15609.6 354.387  10
  -3   1  -9 14984.2 370.742  10
  -3  -1 -10 54500.4 1060.60   4
   3  -1  10 52413.5 1064.09  11
  -3   1 -10 53569.7 999.996   3
   3  -1  10 53930.5 1050.93   2
   3   1  10 51930.0 1039.08   2
  -3   1 -10 52729.3 1080.14  10
   3  -1  10 54287.7 1049.53  10
  -3  -1 -11 1066.54 96.2009   5
  -3  -1 -11 1254.85 77.5963   4
   3  -1  11 1114.53 77.2724  11
  -3   1 -11 1235.66 50.8145   3
   3  -1  11 1286.81 75.9320   2
   3   1  11 1265.95 71.8899   2
   3  -1  11 1207.97 72.1772  10
  -3   1 -11 1217.39 85.5514  10
  -3  -1 -12 71961.9 1505.27   5
  -3  -1 -12 73583.9 1417.95   4
   3  -1  12 74797.1 1415.03   2
   3   1  12 73564.1 1404.71   2
  -3   1 -12 74875.5 1351.94   3
  -3   1 -12 71617.1 1448.78  10
  -3  -1 -13 26482.4 587.197   4
  -3  -1 -13 25478.1 665.581   5
  -3   1 -13 27381.5 581.790  11
   3  -1  13 26532.2 584.581   2
   3   1  13 25847.2 572.425   2
  -3   1 -13 26018.2 522.473   3
  -3   1 -13 26778.6 620.520  10
   3   1  14 86.7537 34.2014  10
  -3   1 -14 124.270 41.7947  10
  -3   1 -14 94.5241 30.7063  11
  -3  -1 -14 30.5263 28.8891  11
  -3  -1 -14 377.238 51.1919   4
  -3  -1 -14 60.2277 39.9603   5
  -3   1 -14 78.3926 18.2149   3
   3  -1  14 289.222 41.5963   2
   3   1  14 37.3855 27.4441   2
  -3  -1 -15 26089.5 614.729   4
  -3   1 -15 28089.3 702.616   5
  -3  -1 -15 27571.8 713.537   5
  -3   1 -15 28054.1 615.391  11
  -3   1 -15 27170.2 654.101  10
  -3  -1 -15 27707.4 626.757  11
   3   1  15 27515.9 612.202   2
  -3   1 -15 27056.5 550.942   3
   3  -1  15 27480.1 619.477   2
   3   1  15 28481.4 636.738  10
   3  -1  15 28530.8 607.177  10
   3   1  16 18470.6 481.287   1
   3   1  16 19984.5 484.397  10
   3  -1  16 19857.7 458.001  10
  -3   1 -16 19173.6 465.895  11
  -3  -1 -16 20119.6 482.951  11
  -3   1 -16 18842.0 507.325  10
  -3   1 -16 18578.7 543.812   5
  -3  -1 -16 18419.6 467.184   4
  -3   1 -16 19621.2 405.081   3
   3   1  16 19313.8 463.480   2
   3  -1  16 18768.2 469.569   2
  -3  -1 -16 18102.2 555.920   5
   3  -1  17 11984.4 317.667  10
   3   1  17 11892.7 341.057  10
  -3   1 -17 11852.3 327.458  11
  -3  -1 -17 11222.5 333.523  11
  -3  -1 -17 11188.4 326.485   4
  -3   1 -17 11739.4 406.504   5
   3  -1  17 11653.9 332.078   2
  -3   1 -17 11736.6 268.801   3
   3   1  17 11442.2 324.582   2
  -3  -1 -17 11439.1 411.095   5
   3  -1  18 73832.7 1419.78  10
   3   1  18 73215.5 1449.94  10
  -3   1 -18 73178.1 1435.17  11
  -3  -1 -18 74087.3 1451.33  11
  -3   1 -18 68108.5 1546.06   5
  -3  -1 -18 66564.1 1426.37   4
   3   1  18 71455.3 1432.35   2
   3  -1  18 70506.0 1439.28   2
  -3   1 -18 72081.0 1354.19   3
  -3  -1 -18 69615.6 1562.31   5
   3   1  19 37.7191 43.2320  10
   3  -1  19 47.6952 43.8923  10
  -3  -1 -19 56.0014 46.1773  11
  -3  -1 -19 64.2548 61.2437   5
  -3  -1 -19 177.789 54.4658   4
  -3   1 -19 7.67488 64.6248   5
  -3   1 -19 64.3841 27.5478   3
   3  -1  19 74.8987 41.7639   2
   3   1  19 35.2587 34.3001   2
   3  -1  20 28438.7 684.235   1
   3  -1  20 29339.6 643.365  10
   3   1  20 28947.7 668.411  10
  -3  -1 -20 29419.4 676.998  11
  -3   1 -20 27916.7 658.877  11
  -3   1 -20 27623.8 774.645   5
  -3  -1 -20 28658.9 564.700   3
  -3  -1 -20 26245.9 650.282   4
   3   1  20 28018.6 659.311   2
   3  -1  20 28384.4 669.086   2
  -3   1 -20 28942.5 583.788   3
  -3  -1 -20 26715.7 775.861   5
  -3  -1 -21 257.763 85.4909   5
  -3   1 -21 258.237 85.3033   5
  -3  -1 -21 339.945 32.8157   3
  -3  -1 -21 320.198 63.1087   4
   3   1  21 282.991 62.4398  10
   3  -1  21 338.731 58.9217  10
  -3   1 -21 305.413 58.8701  11
  -3  -1 -21 372.442 64.6316  11
   3   1  21 257.331 53.2363   2
   3  -1  21 281.354 63.5387   1
   3  -1  21 228.928 55.3234   2
  -3   1 -22 49.4143 41.7963  11
  -3  -1 -22 77.2495 47.4225  11
   3  -1  22 58.8785 37.9695  10
   3   1  22 102.142 50.4576  10
  -3   1 -22 137.389 75.5637   5
  -3  -1 -22 102.227 69.9923   5
  -3  -1 -22 155.438 52.8938   4
   3   1  22 59.3930 42.1576   2
  -3  -1 -22 71.5118 22.7437   3
   3  -1  22 110.710 52.5332   1
   3  -1  22 90.9771 46.3356   2
  -3   1 -23 870.062 89.1213  11
  -3  -1 -23 880.817 90.9307  11
   3  -1  23 792.256 78.3373  10
   3   1  23 779.112 86.7880  10
  -3  -1 -23 896.306 51.2777   3
  -3   1 -23 872.792 128.564   5
  -3  -1 -23 885.025 131.875   5
  -3  -1 -23 733.880 83.8401   4
   3  -1  23 831.414 67.2443   9
   3  -1  23 804.610 89.2901   2
   3   1  23 806.742 85.6508   2
   3  -1  23 979.835 100.354   1
   3  -1  24 4143.44 210.261   1
  -3   1 -24 4474.86 199.735  11
  -3  -1 -24 4598.59 205.298  11
   3   1  24 4461.91 195.662  10
   3  -1  24 4667.20 186.728  10
  -3  -1 -24 3746.81 184.405   4
  -3  -1 -24 4232.59 128.690   3
   3  -1  24 4338.42 153.030   9
   3  -1  24 4196.35 203.335   2
   3   1  24 4256.97 198.724   2
  -3  -1 -24 4278.21 270.774   5
  -3   1 -24 4610.82 281.340   5
   3   1  25 4337.90 220.833   1
   3  -1  25 4499.35 219.385   1
  -3   1 -25 4298.05 200.459  11
   3  -1  25 4339.17 183.860  10
   3   1  25 4512.67 198.454  10
  -3  -1 -25 4030.93 127.107   3
  -3  -1 -25 4126.80 194.462   4
   3  -1  25 4170.19 150.974   9
   3  -1  25 4281.93 206.052   2
   3   1  25 4106.40 198.290   2
  -3  -1 -25 4343.05 281.476   5
  -3   1 -25 4195.14 278.627   5
  -3   1 -26 10487.7 452.408   5
   3  -1  26 10497.4 313.804  10
   3   1  26 10381.5 328.636  10
  -3   1 -26 9866.48 347.006   4
  -3  -1 -26 9545.81 324.420   4
   3  -1  26 10352.9 272.057   9
   3   1  26 9945.92 340.879   2
  -3   1 -26 10129.3 259.575   3
   3  -1  26 10769.1 369.696   1
   3  -1  27 2650.67 117.816   9
  -3  -1 -27 2362.98 150.775   4
  -3   1 -27 2552.32 170.742   4
  -3   1 -27 2557.20 105.982   3
   3   1  27 2546.73 152.428  10
   3  -1  27 2981.01 151.833  10
   3  -1  28 4670.17 161.651   9
  -3   1 -28 4367.50 227.162   4
   3   1  28 4437.08 205.378  10
   3  -1  28 4779.22 198.797  10
   3  -1  29 937.725 96.6023  10
   3   1  30 99.2897 56.5719   9
   3   3 -29 1088.81 105.943   3
  -3   3  29 1115.62 122.668  10
  -3  -3  28 7710.80 220.063   9
  -3   3  28 7572.20 294.724  10
   3   3 -28 8217.74 277.570   3
  -3  -3  28 7842.72 290.683   1
   3   3 -28 7270.63 350.550   5
   3   3 -27 838.901 99.7811  11
  -3   3  27 748.063 104.246  10
   3   3 -27 797.968 91.8287   3
  -3  -3  27 831.650 68.1081   9
  -3  -3  27 850.084 95.9848   1
   3   3 -27 795.682 126.281   5
   3   3 -26 2551.26 152.504  11
  -3   3  26 2679.80 169.320  10
   3   3 -26 2761.66 146.885   3
  -3  -3  26 2410.84 107.130   9
   3   3 -26 2748.11 206.391   5
  -3  -3  26 2357.84 151.187   1
   3  -3 -25 3529.97 184.954   2
  -3  -3  25 3411.36 177.809   2
  -3  -3  25 3363.10 173.398   1
   3   3 -25 3189.24 168.541  11
  -3   3  25 3676.00 192.004  10
   3   3 -25 3480.52 162.863   3
  -3  -3  25 3214.39 124.503   9
  -3   3  25 3371.99 207.084   6
   3  -3 -25 3202.55 230.641   5
   3   3 -25 3311.09 216.701   5
   3  -3 -24 962.992 99.5000   2
  -3  -3  24 806.735 91.4877   2
  -3  -3  24 807.553 87.9040   1
   3   3 -24 884.723 91.4560  11
  -3   3  24 867.889 105.127  10
   3   3 -24 892.321 84.4214   3
   3   3 -24 626.066 110.510   5
  -3  -3  24 892.396 64.0057   9
  -3   3  24 782.220 105.228   6
   3  -3 -24 854.273 127.447   5
   3  -3 -23 3154.80 166.931   2
  -3  -3  23 2703.94 154.907   2
  -3   3  23 2705.88 163.394   1
  -3  -3  23 2909.05 151.820   1
   3   3 -23 2767.23 148.308  11
  -3   3  23 2883.00 174.586  10
   3   3 -23 2881.14 145.017   3
  -3  -3  23 2758.07 111.670   9
  -3   3  23 2596.17 177.081   6
   3   3 -23 2810.96 191.714   5
   3  -3 -23 2585.57 204.695   5
   3  -3 -22 7001.85 258.159   2
  -3  -3  22 6331.24 244.622   2
  -3  -3  22 6478.16 234.708   1
  -3   3  22 6479.94 260.865   1
   3   3 -22 6697.30 237.505  11
  -3   3  22 6969.83 275.568  10
   3   3 -22 6832.81 234.223   3
  -3   3  22 7438.01 319.798   5
  -3  -3  22 6238.38 186.414   9
  -3   3  22 6332.35 281.469   6
   3  -3 -22 6785.30 321.382   5
   3   3 -22 6627.19 293.413   5
  -3   3  21 253.387 63.8718   1
   3  -3 -21 311.073 65.8192   2
  -3  -3  21 238.861 54.2612   1
   3   3 -21 344.288 59.0490  11
  -3   3  21 158.618 69.9363  10
  -3  -3  21 258.588 43.0662   9
   3  -3 -21 229.142 82.2426   5
  -3   3  21 272.119 81.9894   6
   3   3 -21 358.985 61.7014   3
  -3  -3  21 306.821 60.5593   2
  -3   3  21 204.112 79.6390   5
   3   3 -21 283.900 77.7625   5
  -3   3  20 11193.3 356.071   1
  -3  -3  20 11234.6 327.482   1
  -3   3  20 10704.7 407.311   5
   3   3 -20 12062.3 330.495   3
   3   3 -20 11287.9 325.529  11
  -3  -3  20 11352.0 277.972   9
   3  -3 -20 12068.1 350.103   2
  -3  -3  20 11712.6 343.857   2
   3  -3 -20 11163.8 419.783   5
   3   3 -20 11466.0 394.675   5
  -3   3  19 4452.98 199.478   1
  -3  -3  19 4298.67 174.392   1
   3   3 -19 4841.11 180.808   3
   3   3 -19 3960.15 169.269  11
  -3  -3  19 4385.84 140.329   9
   3  -3 -19 4420.19 189.348   2
  -3  -3  19 4547.66 187.603   2
   3  -3 -19 4254.79 238.177   5
   3   3 -19 4559.07 223.137   5
   3   3 -18 356.587 52.9283   3
   3   3 -18 386.454 72.8014   5
   3   3 -18 292.956 51.2563  11
  -3  -3  18 355.079 39.6679   9
   3  -3 -18 537.814 89.3301   5
  -3  -3  18 313.767 50.1473   1
   3  -3 -18 336.570 56.8190   2
   3   3 -18 296.769 56.4025   2
  -3  -3  18 302.320 51.8871   2
  -3   3  18 265.848 55.1631   1
  -3   3  17 30.3627 36.8867   1
   3   3 -17 30.2931 34.9286   2
  -3  -3  17 21.5973 31.7909   2
   3  -3 -17 73.3942 35.6314   2
  -3  -3  17 34.4757 29.3907   1
   3   3 -17 31.5361 42.4479   5
   3   3 -17 34.3238 31.5314  11
  -3  -3  17 64.5609 23.6647   9
   3   3 -17 23.1649 32.4978   3
   3  -3 -17 88.3391 50.5292   5
  -3  -3  16 7374.86 222.977   1
  -3   3  16 6855.67 245.384   1
   3   3 -16 7207.96 220.868  11
   3   3 -16 7201.02 227.283   3
   3   3 -16 7251.08 265.262   5
  -3  -3  16 7163.90 190.513   9
  -3  -3  16 7093.88 231.754   2
   3   3 -16 7519.99 239.278   2
   3  -3 -16 7134.62 238.395   2
   3  -3 -16 6944.10 294.832   5
  -3  -3  15 7552.88 220.535   1
  -3   3  15 7376.27 247.944   1
  -3  -3  15 7186.86 190.785   9
   3   3 -15 7451.93 219.476  11
   3   3 -15 7547.55 230.083   3
   3   3 -15 7422.35 261.708   5
   3  -3 -15 7537.95 241.208   2
  -3  -3  15 7111.65 228.578   2
   3   3 -15 7564.76 236.234   2
   3  -3 -15 7108.66 291.446   5
  -3  -3  14 41892.1 825.668   1
  -3   3  14 39757.7 863.819   1
  -3  -3  14 39103.0 790.640   9
   3   3 -14 40318.4 824.599  11
   3   3 -14 39521.1 877.298   5
   3   3 -14 42650.4 845.029   3
  -3  -3  14 40395.2 841.520   2
   3  -3 -14 39752.7 850.559   2
   3   3 -14 41327.4 847.759   2
   3  -3 -14 39624.4 929.913   5
  -3  -3  13 2453.75 102.462   1
  -3   3  13 2403.63 124.181   1
   3   3 -13 2223.13 79.6779  10
   3   3 -13 2295.91 100.842  11
  -3  -3  13 2517.83 93.4645   9
   3   3 -13 2273.87 123.592   5
   3   3 -13 2635.61 116.916   3
   3  -3 -13 2438.02 152.526   5
  -3  -3  13 2392.75 111.252   2
   3  -3 -13 2441.71 119.629   2
   3   3 -13 2330.30 111.103   2
  -3  -3  12 59441.0 1139.52   2
   3  -3 -12 59920.8 1155.24   2
   3   3 -12 58974.3 1143.85   2
  -3   3  12 59075.4 1165.89   1
  -3  -3  12 59191.6 1117.72   1
   3   3 -12 57163.1 1119.79  11
   3   3 -12 56883.3 1079.58  10
  -3  -3  12 58526.2 1101.79   9
   3   3 -12 57923.2 1165.24   5
   3   3 -12 62323.2 1149.83   3
   3   3 -12 56494.6 1110.11   9
   3  -3 -12 56468.7 1225.36   5
  -3  -3  11 12236.0 306.235   2
   3   3 -11 12987.8 313.462   2
   3   3 -11 12671.1 294.857  11
   3   3 -11 12089.9 259.610  10
  -3  -3  11 12594.1 285.143   9
  -3  -3  11 13129.7 293.605   1
  -3   3  11 12363.3 329.876   1
   3   3 -11 12497.8 288.379   9
  -3   3  11 12278.5 349.937   6
   3  -3 -11 12627.6 373.053   5
  -3  -3  10 8924.63 235.105   2
   3   3 -10 9374.67 240.417   2
  -3   3  10 9178.42 257.075   1
  -3  -3  10 8969.92 219.202   1
   3   3 -10 8939.79 222.111  11
   3   3 -10 8678.32 192.729  10
  -3  -3  10 9199.41 219.248   9
   3   3 -10 9090.51 218.560   9
  -3   3  10 9035.38 275.089   6
   3  -3 -10 8742.04 290.497   5
  -3  -3   9 245.121 29.4438  11
   3   3  -9 189.621 17.6710  10
  -3   3   9 182.957 16.0564   4
   3   3  -9 176.114 24.0379   9
  -3   3   9 245.713 42.1685   6
   3  -3  -9 221.803 42.2809   5
  -3  -3   9 134.687 24.7414   2
  -3   3   9 163.413 30.9624   1
   3   3  -9 167.459 27.8257   2
  -3  -3   9 201.727 24.0587   1
  -3  -3   8 12976.4 295.976   2
   3   3  -8 12782.8 296.574   2
  -3  -3   8 12866.4 273.992   1
  -3   3   8 13308.1 319.841   1
   3   3  -8 12713.2 284.308  11
  -3  -3   8 12854.7 285.102  11
   3   3  -8 12476.0 260.814  10
  -3   3   8 12698.7 261.592   4
   3   3  -8 13192.6 284.148   9
  -3   3   8 12968.4 340.831   6
   3  -3  -8 12769.8 353.952   5
  -3  -3   7 1690.26 71.1868   2
   3   3  -7 1599.43 70.2538   2
   3   3  -7 1668.99 65.4860  11
  -3  -3   7 1671.30 64.0145  11
   3   3  -7 1650.62 56.0799  10
  -3   3   7 1666.31 83.6144   1
  -3  -3   7 1770.96 58.3101   1
   3   3  -7 1736.86 68.2507   9
  -3   3   7 1717.22 95.3950   6
   3  -3  -7 1710.70 102.700   5
   3   3  -6 179841. 3320.43   2
  -3  -3   6 182186. 3319.79   2
  -3  -3   6 178398. 3289.57   1
  -3   3   6 180065. 3348.15   1
   3   3  -6 178576. 3311.16  11
  -3  -3   6 183162. 3302.95  11
   3   3  -6 185609. 3317.64   9
  -3  -3   6 186975. 3305.65   8
   3  -3  -6 179459. 3336.45   7
  -3   3   6 182280. 3378.38   6
   3  -3  -6 183835. 3396.16   5
  -3  -3   5 22623.0 455.376   2
  -3  -3   5 23232.2 426.419   1
  -3   3   5 22446.7 482.676   1
   3   3  -5 21640.3 451.103  11
  -3  -3   5 23130.7 440.950  11
   3   3  -5 23037.5 461.016   9
  -3  -3   5 22471.8 474.454   3
  -3  -3   5 22983.6 446.167   8
   3  -3  -5 22288.5 470.387   7
  -3   3   5 23744.7 510.165   6
   3  -3  -5 22681.6 522.035   5
  -3  -3   4 128025. 2303.21   2
   3   3  -4 119836. 2303.65  11
  -3  -3   4 124267. 2289.84  11
  -3  -3   4 127052. 2331.97   3
  -3   3   4 127910. 2334.09   1
  -3  -3   4 130347. 2297.29   8
   3  -3  -4 128210. 2321.53   7
   3  -3  -4 127522. 2376.16   5
   3   3  -4 123938. 2299.83   5
  -3  -3   3 16200.6 315.484   2
  -3  -3   3 16284.7 311.144  11
  -3  -3   3 14817.3 344.274   3
   3  -3  -3 15820.0 376.172   5
   3   3  -3 16043.7 322.053   5
   3  -3  -3 16172.6 334.366   7
   3  -3  -3 14570.6 348.391   1
  -3   3   3 15938.3 344.781   1
  -3  -3   2 51691.1 946.580   2
   3   3  -2 52272.2 994.607   3
   3  -3  -2 51590.0 991.752   1
  -3   3   2 51601.5 981.744   1
  -3  -3   2 51111.6 954.320  11
  -3   3   2 51203.1 1009.32   8
   3   3  -2 51349.4 954.431   8
  -3   3   2 52213.6 969.149   7
  -3  -3   2 51507.0 959.949   6
   3  -3  -2 51764.6 970.805   7
   3   3  -2 52095.9 967.288   5
   3  -3  -2 47051.2 1012.23   5
   3  -3  -1 5157.99 144.276   1
  -3   3   1 5184.39 139.402   1
  -3   3   1 4812.84 164.997   5
  -3  -3   1 5403.10 128.242   5
   3   3  -1 5383.02 137.063   5
  -3  -3   1 5032.80 150.753   7
   3   3  -1 5284.27 125.717   8
  -3   3   1 5112.91 157.258   8
   3  -3  -1 4977.98 129.155   7
  -3   3   1 5141.37 128.346   7
  -3  -3   1 5104.32 127.990   6
  -3  -3   1 5264.67 106.517   2
   3   3  -1 5549.05 151.492   3
   3  -3   0 2966.66 96.0230   1
  -3   3   0 2833.17 114.419   5
   3   3   0 2783.15 93.6778   5
  -3  -3   0 3005.91 92.3454   5
  -3   3   0 2972.68 108.398   8
   3  -3   0 2748.73 83.3891   7
  -3   3   0 2961.45 84.6827   7
  -3  -3   0 2877.83 105.057   7
   3   3   0 2969.23 88.7250   6
  -3  -3   0 2888.14 88.6752   6
   3   3   0 2900.80 99.7144   3
   3  -3   1 2747.17 89.6870   1
  -3   3  -1 2664.13 102.284   8
  -3   3  -1 2570.68 106.314   5
   3   3   1 2474.59 95.9384   5
  -3  -3  -1 2933.60 96.6894   5
   3   3   1 2813.78 92.0780   6
  -3   3  -1 2625.90 79.4093   7
  -3  -3  -1 2706.09 100.359   7
   3  -3   1 2634.28 96.1491   3
   3   3   1 2727.44 95.6710   3
   3  -3   2 187720. 3483.44   3
  -3  -3  -2 193109. 3472.98   3
   3   3   2 195175. 3478.14   3
  -3   3  -2 181631. 3504.00  11
  -3   3  -2 194929. 3458.99   7
  -3   3  -2 190711. 3493.13   8
  -3  -3  -2 191336. 3495.08   7
   3   3   2 191345. 3482.57   6
  -3  -3  -2 192136. 3491.85   5
   3  -3   3 2589.86 96.9370   3
   3   3   3 2914.11 94.7833   3
  -3  -3  -3 2747.70 63.8108   2
  -3  -3  -3 2851.56 92.9694   3
  -3   3  -3 2653.09 105.865  10
  -3   3  -3 2631.43 108.593  11
  -3   3  -3 2849.99 104.787   8
   3   3   3 2899.48 105.009   6
  -3  -3  -3 2708.87 104.481   7
   3   3   3 2716.46 109.079   5
  -3  -3  -3 2541.63 105.253   5
  -3  -3  -4 137695. 2489.84   3
   3  -3   4 140285. 2510.37   3
  -3  -3  -4 133680. 2456.18   2
  -3   3  -4 128325. 2517.70  10
  -3   3  -4 134351. 2525.35  11
  -3  -3  -4 139286. 2520.97   7
   3   3   4 137753. 2521.87   6
   3   3   4 133637. 2534.48   5
  -3  -3  -4 135774. 2535.70   5
   3  -3   5 39.0012 18.9131   3
  -3  -3  -5 67.3522 16.8286   3
  -3  -3  -5 87.3963 13.5716   2
  -3   3  -5 59.4115 22.7170  10
  -3   3  -5 34.3466 18.7250  11
   3   3   5 49.2340 24.3010   4
  -3  -3  -5 83.9639 23.4261   4
   3   3   5 91.9139 28.6342   5
  -3  -3  -5 69.7856 22.6641   7
  -3  -3  -5 64.9565 27.7029   5
   3   3   5 49.2878 23.3166   6
  -3   3  -6 5868.82 160.379   3
  -3  -3  -6 5468.56 147.774   3
  -3  -3  -6 5381.88 135.916   2
   3   3   6 5442.69 139.138   2
   3  -3   6 5749.77 161.882   3
  -3   3  -6 5595.85 173.257  10
  -3   3  -6 5885.81 177.044  11
   3   3   6 5713.65 173.146   4
  -3  -3  -6 5524.20 175.238   4
   3   3   6 5780.48 195.793   5
  -3  -3  -6 6038.64 177.393   7
   3   3   6 5918.21 187.307   6
  -3  -3  -6 5575.31 196.173   5
  -3  -3  -7 9408.62 220.745   3
   3   3   7 9335.05 218.442   2
  -3   3  -7 9616.61 235.821   3
  -3  -3  -7 9397.59 215.540   2
   3  -3   7 9600.98 235.404   3
  -3   3  -7 9565.87 253.481  10
  -3   3  -7 9540.15 252.910  11
   3   3   7 9528.10 280.378   5
  -3  -3  -7 9762.03 255.229   4
   3   3   7 9913.72 253.041   4
  -3  -3  -7 9553.29 254.218   7
   3   3   7 9405.49 270.867   6
  -3  -3  -7 9153.47 283.581   5
  -3   3  -8 50983.4 980.438   3
  -3  -3  -8 49687.1 962.572   2
   3   3   8 49562.5 966.762   2
  -3  -3  -8 50251.7 961.294   3
  -3   3  -8 51247.2 1005.20  11
   3  -3   8 52104.9 1002.27  10
  -3   3  -8 50384.9 1005.50  10
  -3  -3  -8 49854.1 1003.28   4
   3  -3   8 50412.0 976.865   3
   3   3   8 49853.9 1046.71   5
   3   3   8 51930.4 1004.54   4
  -3  -3  -8 50887.5 1009.12   7
   3   3   8 49048.1 1036.05   6
  -3  -3  -8 49667.7 1060.28   5
  -3   3  -9 337.434 35.3996   3
  -3  -3  -9 335.010 30.0425   3
  -3  -3  -9 361.855 34.6397   2
   3   3   9 348.015 34.6120   2
  -3   3  -9 344.029 42.2651  11
  -3   3  -9 373.762 45.4615  10
   3  -3   9 336.738 43.4615  10
   3   3   9 335.741 43.8181   1
  -3  -3  -9 283.652 40.6174   4
   3   3   9 350.833 54.0638   5
   3  -3   9 401.924 35.8194   3
   3   3   9 390.136 46.9287   4
  -3  -3  -9 325.088 43.4417   7
   3   3   9 323.553 52.4932   6
  -3  -3  -9 406.250 60.1698   5
  -3   3 -10 142399. 2665.55   3
  -3  -3 -10 144453. 2641.86   3
  -3  -3 -10 146948. 2659.32   2
   3   3  10 139647. 2661.26   2
  -3   3 -10 146440. 2693.56  11
  -3   3 -10 143938. 2698.50  10
   3  -3  10 150702. 2690.29  10
   3   3  10 145464. 2705.36   1
   3   3  10 141115. 2753.23   5
   3  -3  10 140929. 2654.36   3
  -3  -3 -10 142164. 2690.13   4
   3   3  10 146827. 2693.13   4
  -3  -3 -10 147423. 2709.18   7
   3   3  10 144899. 2747.27   6
   3   3  11 181.917 39.9490   1
  -3  -3 -11 155.252 29.0397   2
  -3   3 -11 96.8243 36.1311  10
  -3   3 -11 140.912 37.0133  11
   3   3  11 157.061 45.1037   5
  -3  -3 -11 115.727 34.3624   4
   3  -3  11 159.374 28.0390   3
   3   3  11 124.621 35.4424   4
  -3  -3 -11 225.027 42.4474   7
  -3   3 -11 180.094 31.8094   3
   3   3  11 181.293 32.0086   2
  -3   3 -12 37592.4 784.128  11
  -3  -3 -12 35839.2 776.766   4
  -3   3 -12 35967.0 789.773  10
   3   3  12 36693.9 798.851   1
  -3   3 -12 38678.9 753.332   3
   3   3  12 37388.0 760.323   2
  -3   3 -13 1525.16 93.5957  11
   3  -3  13 1637.65 100.856  11
  -3  -3 -13 1586.01 93.4436   4
  -3   3 -13 1671.52 101.380  10
   3   3  13 1629.41 103.402   1
  -3   3 -13 1864.61 85.6106   3
   3   3  13 1720.69 91.1361   2
  -3   3 -14 10873.8 292.747  11
   3  -3  14 10895.9 303.554  11
  -3  -3 -14 9757.26 277.850   4
  -3   3 -14 10105.9 298.808  10
   3   3  14 10748.1 336.973  10
   3  -3  14 9561.22 191.327   9
   3   3  14 10707.1 310.368   1
   3   3  14 10398.5 276.235   2
  -3  -3 -14 10825.6 273.742   2
  -3   3 -15 299.849 50.0669  11
   3  -3  15 347.695 54.9273  11
   3  -3  15 319.743 17.8278   9
   3  -3  15 364.398 50.3212  10
   3   3  15 368.152 68.2936  10
  -3   3 -15 382.318 58.1660  10
  -3  -3 -15 277.379 46.2086   4
  -3  -3 -15 257.548 42.8587   2
   3   3  15 239.055 48.7361   1
   3   3  15 305.888 44.6627   2
   3  -3  16 16866.2 431.496  11
  -3   3 -16 16403.8 413.257  11
   3   3  16 16286.8 455.197  10
   3  -3  16 16436.9 392.289  10
  -3   3 -16 15369.2 421.123  10
  -3  -3 -16 15474.6 394.836   4
   3  -3  16 15120.4 302.359   9
   3   3  16 15627.2 393.187   2
  -3  -3 -16 16206.9 393.363   2
   3   3  16 15602.0 428.189   1
   3   3  17 24347.8 594.271   1
  -3   3 -17 24990.3 569.821  11
   3  -3  17 23849.9 587.543  11
  -3   3 -17 22177.8 576.447  10
   3  -3  17 25300.7 547.351  10
   3   3  17 25846.1 623.560  10
  -3  -3 -17 22430.0 544.665   4
   3  -3  17 23120.8 451.739   9
   3   3  17 24886.8 640.751   6
  -3  -3 -17 24645.8 551.451   2
   3   3  17 23462.0 551.124   2
   3   3  18 17427.8 483.649   1
  -3   3 -18 19284.1 469.138  11
   3  -3  18 18639.6 440.624  10
   3   3  18 18510.2 504.651  10
  -3   3 -18 17282.4 480.436  10
  -3  -3 -18 17440.6 443.148   4
   3  -3  18 17383.0 351.611   9
   3   3  18 17742.3 525.096   6
  -3   3 -18 19412.6 421.245   3
   3   3  18 18158.1 452.006   2
  -3  -3 -18 18491.4 450.740   2
   3   3  19 1216.38 107.140   1
  -3   3 -19 1178.54 96.8466  11
   3  -3  19 985.964 81.4448  10
  -3   3 -19 1045.27 101.094  10
   3   3  19 1063.14 106.956  10
  -3  -3 -19 887.887 80.8695   4
   3  -3  19 922.142 40.6905   9
   3   3  19 947.399 112.182   6
  -3  -3 -19 937.135 81.3327   2
   3   3  19 936.322 82.5637   2
  -3   3 -19 1130.42 74.3362   3
   3   3  20 19486.2 529.273   1
  -3   3 -20 20611.6 509.517  11
   3  -3  20 20415.7 476.419  10
  -3   3 -20 18816.2 527.117  10
   3   3  20 19337.0 536.544  10
  -3  -3 -20 18365.6 476.373   4
  -3   3 -20 20687.5 604.438   5
   3  -3  20 18873.3 383.626   9
   3   3  20 20206.3 579.058   6
  -3   3 -20 20566.1 451.035   3
  -3  -3 -20 21227.1 497.477   2
   3   3  20 19325.7 492.638   2
   3  -3  20 18019.3 500.411   2
   3  -3  21 2321.43 142.125   1
   3   3  21 2530.68 157.701   1
  -3   3 -21 2409.92 142.630  11
  -3   3 -21 2204.81 150.221  10
   3  -3  21 2420.54 125.402  10
   3   3  21 2272.93 153.778  10
  -3   3 -21 2133.08 176.492   5
  -3  -3 -21 2309.17 128.501   4
   3  -3  21 2215.15 70.5831   9
   3   3  21 2392.51 173.116   6
   3  -3  21 2200.16 141.788   2
   3   3  21 2494.23 138.418   2
  -3   3 -21 2446.55 111.160   3
   3   3  22 8309.67 307.039   1
   3  -3  22 8230.36 288.133   1
  -3   3 -22 8725.91 290.339  11
  -3   3 -22 7581.46 300.172  10
   3   3  22 8329.30 307.612  10
   3  -3  22 8286.67 255.807  10
  -3   3 -22 7433.54 348.949   5
  -3  -3 -22 7348.27 253.894   4
   3  -3  22 7709.03 178.472   9
   3   3  22 7733.07 329.635   6
  -3   3 -22 8169.69 234.103   3
   3  -3  22 7835.91 287.092   2
   3   3  22 8057.11 275.602   2
   3  -3  23 3589.84 183.474   2
  -3   3 -23 3724.12 142.696   3
   3   3  23 3411.07 172.292   2
   3   3  23 3389.18 191.958   1
   3  -3  23 3396.09 181.947   1
  -3   3 -23 3508.71 179.157  11
   3  -3  23 3378.53 153.913  10
   3   3  23 3274.94 186.208  10
  -3   3 -23 3319.89 234.507   5
  -3  -3 -23 3214.46 156.194   4
   3  -3  23 3376.07 95.4648   9
   3   3  23 3413.37 213.930   6
  -3  -3 -23 2772.06 226.186   5
  -3   3 -24 2319.90 110.550   3
   3  -3  24 2235.10 146.343   2
   3   3  24 2074.34 135.763   2
   3  -3  24 2343.50 149.009   1
   3   3  24 2214.16 157.674   1
  -3   3 -24 2275.43 146.254  11
   3  -3  24 2342.32 127.014  10
   3   3  24 2196.12 153.613  10
  -3  -3 -24 1795.37 120.164   4
  -3   3 -24 2226.77 192.928   5
   3  -3  24 2202.13 72.5094   9
   3   3  24 1958.57 170.223   6
  -3  -3 -24 1848.96 189.585   5
   3  -3  25 2344.15 129.910  10
   3   3  25 2235.30 158.326  10
  -3  -3 -25 2027.97 126.233   4
  -3   3 -25 2120.65 197.684   5
  -3   3 -25 2332.23 112.395   3
   3  -3  25 2239.07 149.127   1
   3  -3  25 2059.28 71.3431   9
   3   3  26 10531.7 355.792  10
   3  -3  26 10719.3 306.406  10
  -3   3 -26 10434.4 277.784   3
   3  -3  26 10536.2 351.974   1
   3  -3  27 172.112 67.2359  10
   3  -3  28 8261.99 271.685  10
  -3  -5  28 7579.39 269.004   1
   3   5 -27 666.282 118.841   5
  -3  -5  27 730.668 87.6730   1
   3   5 -26 216.908 88.2439   5
   3   5 -26 128.326 63.3030   3
   3   5 -26 248.770 76.8278  11
  -3  -5  26 185.062 59.1315   1
  -3   5  25 5122.72 271.211  10
   3   5 -25 5647.45 238.809  11
  -3  -5  25 5302.54 208.546   1
   3   5 -25 6140.97 240.557   3
   3   5 -25 5302.26 274.641   5
  -3   5  24 554.534 105.603  10
   3   5 -24 495.795 100.937   5
   3   5 -24 707.754 92.1336  11
   3   5 -24 657.257 88.0908   3
  -3  -5  24 455.928 76.5192   2
   3  -5 -24 625.093 85.4774   2
  -3  -5  24 600.594 71.6485   1
  -3  -5  23 238.025 53.0712   1
   3  -5 -23 182.751 64.6296   2
  -3   5  23 169.043 59.8066   1
   3   5 -23 136.249 62.4991  11
   3   5 -23 215.380 76.5349   5
  -3  -5  23 249.264 66.1899   2
   3   5 -23 291.261 71.1091   3
   3  -5 -23 93.3985 79.4914   5
  -3   5  22 11162.5 379.613   1
  -3  -5  22 11613.0 330.897   1
   3   5 -22 12108.9 361.743  11
   3   5 -22 12082.6 416.404   5
   3  -5 -22 11863.4 462.349   5
   3   5 -22 13095.2 373.652   3
  -3  -5  22 12147.9 368.368   2
   3  -5 -22 12671.3 375.184   2
  -3  -5  21 16351.6 449.143   2
   3  -5 -21 16972.2 457.043   2
   3   5 -21 17403.0 456.942   3
  -3  -5  21 16364.1 413.157   1
  -3   5  21 15782.0 468.866   1
   3   5 -21 17510.6 450.354  11
  -3   5  21 15170.4 544.345   5
   3   5 -21 16304.2 497.289   5
  -3   5  21 16324.7 511.313   6
   3  -5 -21 15861.6 547.246   5
   3   5 -20 6382.67 237.553   3
  -3  -5  20 5770.73 225.249   2
   3  -5 -20 6165.54 233.376   2
  -3  -5  20 5826.76 199.991   1
  -3   5  20 5727.14 243.844   1
   3   5 -20 6319.50 228.716  11
  -3   5  20 6389.82 315.169   5
   3   5 -20 5664.43 255.000   5
  -3   5  20 5420.94 262.726   6
   3  -5 -20 5579.81 293.960   5
  -3  -5  19 7462.64 261.123   2
   3   5 -19 7932.49 268.092   3
   3  -5 -19 8021.42 269.293   2
  -3  -5  19 7417.77 231.251   1
  -3   5  19 7519.09 280.582   1
   3   5 -19 7832.84 258.268  11
   3   5 -19 7544.10 292.379   5
  -3   5  19 8199.63 355.623   5
  -3   5  19 7672.28 309.857   6
   3  -5 -19 7773.08 338.454   5
  -3  -5  18 6556.73 233.465   2
   3   5 -18 6726.55 239.680   3
   3  -5 -18 6938.12 240.416   2
   3   5 -18 6635.74 228.380  11
   3   5 -18 6303.00 177.311  10
  -3  -5  18 5970.18 198.698   1
  -3   5  18 6570.83 248.850   1
  -3   5  18 6491.07 309.775   5
   3   5 -18 6342.92 255.666   5
  -3   5  18 6414.46 274.103   6
   3  -5 -18 6455.17 299.295   5
  -3  -5  17 2965.72 144.770   2
   3  -5 -17 3090.30 149.120   2
   3   5 -17 2944.15 150.241   3
   3   5 -17 3109.96 143.438  11
   3   5 -17 2676.95 101.582  10
  -3  -5  17 2950.22 122.320   1
  -3   5  17 2695.43 152.204   1
   3   5 -17 2771.23 157.045   5
  -3   5  17 2794.76 171.405   6
   3  -5 -17 2761.47 154.048   7
  -3   5  17 3419.28 213.650   5
   3  -5 -17 2626.05 183.468   5
   3  -5 -16 991.859 83.4194   2
   3   5 -16 941.793 85.0551   3
  -3  -5  16 956.973 79.6942   2
   3   5 -16 1010.80 57.3418  10
   3   5 -16 1027.67 80.7318  11
  -3  -5  16 904.156 63.5435   1
  -3   5  16 1003.58 89.8178   1
   3  -5 -16 837.643 87.0505   7
  -3   5  16 988.010 102.201   6
  -3   5  16 1026.20 121.839   5
   3  -5 -16 835.617 103.155   5
  -3  -5  15 11682.1 325.013   2
   3   5 -15 12577.7 347.732   3
   3  -5 -15 12365.3 338.223   2
   3   5 -15 12146.3 325.206  11
   3   5 -15 11627.5 273.328  10
  -3   5  15 11473.6 347.015   1
  -3  -5  15 11709.8 288.347   1
  -3   5  15 12534.9 392.480   6
   3  -5 -15 11025.7 346.462   7
  -3   5  15 13134.8 439.807   5
   3  -5 -15 11709.9 405.522   5
  -3  -5  14 39941.3 829.213   2
   3   5 -14 41269.9 859.590   3
   3  -5 -14 40476.8 845.175   2
   3  -5 -14 41108.7 884.452   1
  -3   5  14 39501.4 858.824   1
  -3  -5  14 39918.4 782.150   1
   3   5 -14 39806.9 829.630  11
  -3  -5  14 39649.0 821.504  11
   3   5 -14 38323.4 766.735  10
   3   5 -14 38396.1 782.172   9
   3  -5 -14 36826.6 853.565   7
  -3   5  14 40402.2 907.728   6
  -3   5  14 40054.4 972.310   5
   3  -5 -14 36245.2 921.834   5
   3  -5 -13 5706.90 198.076   2
  -3  -5  13 5554.73 186.125   2
   3   5 -13 5844.46 208.668   3
   3  -5 -13 5715.84 219.821   1
  -3   5  13 5189.97 201.129   1
  -3  -5  13 5424.14 153.273   1
   3   5 -13 5473.03 186.667  11
  -3  -5  13 5450.94 179.840  11
   3   5 -13 5149.86 148.663  10
  -3   5  13 5499.22 145.103   4
   3   5 -13 5227.83 156.425   9
   3  -5 -13 5362.68 205.834   7
  -3   5  13 5488.81 231.533   6
  -3   5  13 5213.36 257.313   5
   3   5 -12 44261.3 905.832   3
  -3  -5  12 42063.9 867.340   2
   3  -5 -12 42419.0 884.930   2
   3  -5 -12 44329.2 924.843   1
  -3  -5  12 42253.7 818.132   1
  -3   5  12 40751.4 895.691   1
   3   5 -12 42672.0 871.890  11
  -3  -5  12 43519.0 858.007  11
   3   5 -12 40953.3 821.761  10
  -3   5  12 43717.7 822.926   4
   3   5 -12 41881.3 831.723   9
  -3   5  12 41715.2 942.820   6
   3  -5 -12 39966.1 893.627   7
  -3   5  12 43487.1 1015.41   5
   3   5 -11 182.557 44.5430   3
   3  -5 -11 89.3619 33.6898   2
  -3  -5  11 73.6559 31.2038   2
  -3   5  11 170.492 40.8531   1
   3  -5 -11 106.585 47.0459   1
  -3  -5  11 94.7213 21.5416   1
   3   5 -11 157.995 36.2721  11
  -3  -5  11 118.932 29.9870  11
   3   5 -11 116.167 27.0035  10
  -3   5  11 121.344 27.9968   4
  -3  -5  11 140.346 31.4523   8
   3   5 -11 125.384 28.1175   9
  -3   5  11 80.0609 42.3837   6
   3  -5 -11 114.281 40.2722   7
  -3   5  11 159.082 59.6897   5
  -3  -5  10 26597.4 566.341   2
  -3   5  10 26507.0 595.513   1
  -3  -5  10 26771.8 513.014   1
   3  -5 -10 28028.4 620.607   1
  -3  -5  10 26075.5 553.164  11
   3   5 -10 26611.0 575.028  11
   3   5 -10 25759.0 542.380  10
  -3   5  10 27182.1 548.915   4
   3   5 -10 25556.9 540.999   9
  -3  -5  10 27443.8 560.260   8
  -3   5  10 26580.5 640.401   6
   3  -5 -10 25835.7 594.740   7
  -3   5  10 27803.1 696.609   5
  -3  -5   9 300.418 37.1946   2
   3  -5  -9 316.022 48.7931   1
  -3  -5   9 348.600 20.0891   1
  -3   5   9 322.861 43.8531   1
   3   5  -9 429.294 46.5504  11
  -3  -5   9 326.828 33.7220  11
   3   5  -9 437.791 39.1468  10
  -3   5   9 327.006 37.8989   4
  -3  -5   9 425.756 41.1412   8
   3   5  -9 318.403 33.5723   9
  -3   5   9 350.448 56.3007   6
   3  -5  -9 286.415 44.2346   7
  -3   5   9 352.363 65.8853   5
  -3  -5   8 18518.1 404.099   2
  -3   5   8 18246.8 434.386   1
   3  -5  -8 19306.2 453.689   1
   3   5  -8 17831.4 417.028  11
  -3  -5   8 17845.9 389.613  11
   3   5  -8 18445.7 392.914   9
  -3  -5   8 18123.8 430.333   3
  -3  -5   8 18951.7 401.954   8
   3  -5  -8 17514.1 429.171   7
  -3   5   8 18764.6 474.297   6
  -3   5   8 18555.1 517.245   5
  -3  -5   7 2238.32 89.5140   2
   3   5  -7 2296.46 114.816   3
  -3   5   7 2128.78 104.674   1
   3   5  -7 2346.40 101.979  11
  -3  -5   7 2269.17 83.3159  11
   3   5  -7 2444.16 91.4914   9
  -3  -5   7 2306.46 108.109   3
  -3  -5   7 2329.91 91.2035   8
   3  -5  -7 2200.05 105.941   7
   3   5  -7 2350.35 97.7706   5
  -3   5   7 2393.30 152.097   5
  -3  -5   6 116599. 2127.27   2
  -3  -5   6 113847. 2118.42  11
  -3  -5   6 114576. 2172.50   3
  -3   5   6 112956. 2161.22   1
  -3  -5   6 119498. 2135.80   8
   3  -5  -6 111968. 2162.98   7
  -3   5   6 116876. 2271.21   5
   3   5  -6 111660. 2145.45   5
  -3  -5   5 383.517 33.9569   2
  -3  -5   5 411.058 35.5769  11
  -3  -5   5 469.775 48.6283   3
  -3   5   5 448.048 47.6011   1
   3  -5  -5 360.789 44.0180   7
  -3   5   5 366.126 64.5299   5
   3   5  -5 384.176 41.9897   5
  -3  -5   4 55758.4 1059.48   2
  -3  -5   4 57026.4 1069.49  11
  -3  -5   4 55105.0 1113.76   3
  -3   5   4 56499.0 1141.81   8
  -3   5   4 56403.5 1191.09   5
   3   5  -4 56393.5 1097.68   5
  -3  -5   4 56063.5 1084.80   6
   3  -5  -4 55549.1 1100.96   7
   3  -5  -4 57914.1 1115.46   1
  -3   5   4 56518.4 1095.81   1
  -3  -5   3 9961.72 218.488   2
   3   5  -3 10759.7 282.687   3
   3  -5  -3 9874.72 263.899   1
  -3   5   3 9579.09 247.160   1
  -3  -5   3 10304.0 237.623  11
   3   5  -3 10128.5 235.926   8
  -3   5   3 10261.4 287.003   8
  -3   5   3 10278.1 253.946   7
  -3  -5   3 10031.8 247.786   6
   3  -5  -3 9571.14 253.579   7
   3   5  -3 9921.93 259.011   5
  -3   5   3 10322.6 319.463   5
  -3  -5   2 17390.3 354.405   2
   3  -5  -2 17584.2 425.035   3
   3   5  -2 18712.3 426.878   3
  -3   5   2 17618.3 390.087   1
   3  -5  -2 18414.1 407.818   1
  -3  -5   2 18220.5 387.904  11
   3   5  -2 17720.7 384.218   8
  -3   5   2 18365.3 434.911   8
  -3   5   2 18256.0 397.242   7
   3  -5  -2 18127.1 402.157   7
  -3  -5   2 17964.3 397.015   6
  -3   5   2 18255.6 470.109   5
   3   5  -2 18094.1 411.138   5
   3   5  -1 49.3587 25.9299   3
   3  -5  -1 31.3445 23.5229   3
   3  -5  -1 36.8000 20.9596   1
   3   5  -1 54.9931 8.16252   1
  -3  -5   1 50.8548 11.2875   2
  -3  -5   1 60.0536 21.6828  11
  -3   5   1 35.7368 24.5825   8
   3   5  -1 69.0767 21.3179   8
   3  -5  -1 145.089 27.9344   7
  -3   5   1 29.9530 20.9292   7
  -3  -5   1 28.8938 20.7256   6
   3   5  -1 41.0463 26.1126   5
  -3   5   1 92.1146 36.6372   5
   3   5   0 43305.1 847.673   3
   3  -5   0 41009.2 847.368   3
   3   5   0 39790.8 768.946   1
   3  -5   0 41986.8 819.084   1
   3  -5   0 38936.1 857.658  11
  -3   5   0 40966.3 851.575   8
  -3  -5   0 41597.9 852.515   7
   3   5   0 40719.6 817.338   8
  -3   5   0 41447.9 814.740   7
  -3  -5   0 42039.2 828.380   6
   3   5   0 41978.0 849.451   5
  -3  -5   0 43742.4 825.923   5
  -3   5   0 39198.3 877.808   5
   3  -5   1 8746.87 250.343   3
   3   5   1 9195.70 247.767   3
  -3  -5  -1 8663.62 239.492   3
   3   5   1 8735.12 196.720   1
   3  -5   1 8631.55 221.306   1
   3  -5   1 8496.51 256.101  11
  -3   5  -1 9168.92 253.305   8
  -3  -5  -1 8875.27 238.470   6
  -3  -5  -1 8577.68 251.111   7
  -3   5  -1 8733.72 223.147   7
   3   5   1 8783.28 253.553   5
  -3  -5  -1 9151.29 239.407   5
  -3   5  -1 8440.57 267.880   5
   3   5   2 50529.7 994.116   3
  -3  -5  -2 49240.1 987.478   3
   3  -5   2 48745.7 1001.49   3
   3  -5   2 49744.1 960.976   1
   3   5   2 48725.1 943.425   1
   3  -5   2 50360.3 1009.57  11
  -3   5  -2 48727.5 999.497   8
  -3  -5  -2 50581.7 993.599   6
  -3  -5  -2 49923.9 1007.41   7
  -3   5  -2 49491.4 967.380   7
   3   5   2 50273.2 1017.33   5
  -3  -5  -2 50881.9 997.193   5
  -3   5  -2 47627.2 1024.09   5
  -3  -5  -3 14014.6 333.217   3
  -3  -5  -3 13590.5 266.463   2
   3  -5   3 14008.4 347.764   3
   3  -5   3 13761.4 308.886   1
   3   5   3 13299.4 302.054   1
   3  -5   3 13382.5 343.974  11
  -3   5  -3 13595.8 340.549   8
  -3  -5  -3 13402.1 341.873   6
   3   5   3 13827.6 342.956   6
  -3   5  -3 13290.5 316.213   7
  -3  -5  -3 12897.6 342.992   7
  -3  -5  -3 13622.8 350.018   5
   3   5   3 13444.4 359.937   5
  -3   5  -3 13231.2 360.441   5
  -3  -5  -4 71029.8 1349.28   3
   3  -5   4 70428.7 1367.73   3
  -3  -5  -4 67968.7 1278.44   2
   3  -5   4 69190.2 1362.26  11
   3   5   4 68203.5 1323.63   1
   3  -5   4 70724.4 1319.43   1
  -3   5  -4 70605.6 1361.95   8
   3   5   4 70391.7 1373.53   6
  -3  -5  -4 71228.8 1374.11   7
  -3   5  -4 72111.1 1336.95   7
  -3   5  -4 67997.0 1383.97   5
  -3  -5  -4 66948.6 1377.06   5
   3   5   4 71248.9 1396.48   5
  -3  -5  -5 7757.23 172.305   2
  -3  -5  -5 7731.11 218.736   3
   3  -5   5 7519.55 228.814   3
  -3   5  -5 7552.38 247.750  11
   3  -5   5 7625.14 227.689  11
  -3   5  -5 7989.62 236.514  10
   3   5   5 8020.15 211.828   1
  -3   5  -5 7860.23 217.821   7
  -3  -5  -5 7815.79 238.210   7
   3   5   5 8152.72 246.372   6
   3   5   5 7674.50 256.096   5
  -3  -5  -5 7403.81 247.095   5
   3  -5   6 5046.69 175.414   3
  -3  -5  -6 5387.28 129.924   2
  -3  -5  -6 4895.74 162.854   3
   3   5   6 5030.64 161.489   1
  -3   5  -6 5008.33 192.116  11
   3  -5   6 4887.29 169.560  11
  -3   5  -6 5473.64 183.822  10
   3  -5   6 5151.99 185.571   8
   3   5   6 4836.93 186.084   6
  -3  -5  -6 4971.35 182.151   7
   3   5   6 5010.71 202.667   5
  -3  -5  -6 4797.95 193.439   5
  -3  -5  -7 14.8189 20.3872   3
   3  -5   7 8.57415 21.5347   3
  -3  -5  -7 50.8824 15.8851   2
   3   5   7 44.0253 24.4849   1
  -3   5  -7 54.8625 34.5715  11
  -3   5  -7 61.9238 32.5651  10
   3   5   7 8.91236 32.7138   5
   3  -5   7 74.5867 33.5377   8
  -3  -5  -7 56.8040 29.2439   7
   3   5   7 37.6487 32.9474   6
  -3  -5  -7 16.9101 31.8420   5
  -3  -5  -8 25459.7 530.575   3
  -3   5  -8 24008.6 534.301   3
  -3  -5  -8 24016.8 485.137   2
   3  -5   8 23841.2 537.509   3
   3   5   8 22848.4 533.103   1
   3  -5   8 23925.5 533.383  11
  -3   5  -8 24006.6 565.395  11
  -3   5  -8 24057.1 546.654  10
   3  -5   8 24194.0 556.942   8
   3   5   8 22874.4 569.567   6
  -3  -5  -8 24014.9 557.561   7
  -3  -5  -8 23561.7 590.560   5
   3   5   8 24060.8 599.672   5
  -3   5  -9 2383.73 112.103   3
  -3  -5  -9 2580.03 108.063   3
  -3  -5  -9 2396.17 88.0462   2
   3   5   9 2354.80 115.968   1
   3  -5   9 2264.63 110.376  11
  -3   5  -9 2430.53 128.742  11
  -3   5  -9 2300.47 117.794  10
   3  -5   9 2501.46 113.691   3
   3  -5   9 2457.02 125.328   8
  -3  -5  -9 2185.30 120.467   7
   3   5   9 2422.13 134.057   6
   3   5   9 2271.29 142.455   5
  -3  -5  -9 2471.53 146.619   5
  -3   5 -10 41550.1 850.685   3
  -3  -5 -10 40907.4 805.938   2
  -3  -5 -10 40254.2 830.675   3
   3   5  10 40407.2 862.950   1
   3  -5  10 40240.0 848.472  11
  -3   5 -10 42408.3 884.857  11
  -3   5 -10 40894.5 861.018  10
   3   5  10 41484.7 934.412   5
   3  -5  10 40366.1 844.514   3
   3  -5  10 41247.8 874.865   8
   3   5  10 40199.4 902.847   6
  -3  -5 -10 41327.8 881.091   7
  -3  -5 -10 41586.2 937.000   5
  -3  -5 -11 5601.30 178.495   3
  -3  -5 -11 5720.08 167.835   2
  -3   5 -11 6074.52 195.992   3
   3  -5  11 5625.15 199.785   2
   3   5  11 5565.12 203.774   1
   3  -5  11 5872.68 195.127  11
  -3   5 -11 6126.86 217.580  11
  -3   5 -11 5641.25 199.905  10
   3  -5  11 5788.60 189.327   3
   3   5  11 5677.11 242.886   5
   3  -5  11 5854.30 209.554   8
  -3  -5 -11 5523.48 210.906   7
   3   5  11 5538.01 227.871   6
  -3  -5 -11 5536.87 246.108   5
  -3  -5 -12 53539.8 1050.22   3
   3  -5  12 53747.3 1089.70   2
  -3   5 -12 55961.1 1077.04   3
   3   5  12 52489.4 1097.75   1
  -3   5 -12 54460.1 1111.89  11
   3  -5  12 51822.6 1076.41  11
  -3   5 -12 50811.3 1079.37  10
   3   5  12 53697.5 1170.04   5
   3   5  12 54755.2 1085.42   4
   3  -5  12 51254.6 1060.74   3
   3  -5  12 54130.1 1099.95   8
   3   5  12 52193.2 1144.82   6
  -3  -5 -12 51824.5 1108.49   7
  -3  -5 -12 50476.2 1175.69   5
  -3  -5 -13 79.2244 32.5839   3
   3  -5  13 57.6741 30.5271   3
  -3   5 -13 71.3469 35.4486   3
   3  -5  13 61.7439 40.3546   2
   3   5  13 56.4075 39.8682   1
   3  -5  13 87.0867 38.8907  11
  -3   5 -13 119.551 48.3567  11
  -3   5 -13 99.7408 40.0315  10
   3   5  13 84.4234 56.0886   5
   3   5  13 91.4548 45.4656   4
   3  -5  13 60.4044 44.9667   8
  -3  -5 -13 84.6327 44.2285   7
  -3  -5 -13 13.0284 55.4016   5
   3   5  13 69.6085 48.1475   6
  -3  -5 -14 11496.0 291.027   3
  -3   5 -14 11770.4 310.670   3
   3  -5  14 11484.4 327.104   2
  -3  -5 -14 11060.3 291.055   2
   3   5  14 11691.0 340.842   1
   3  -5  14 11547.8 322.861  11
  -3   5 -14 11397.3 338.385  11
  -3   5 -14 10692.8 316.663  10
   3   5  14 11563.2 318.439   4
   3  -5  14 10570.3 291.069   3
   3   5  14 11174.1 381.530   5
   3  -5  14 10826.8 323.173   8
  -3  -5 -14 11218.5 342.159   7
   3   5  14 11418.5 370.486   6
  -3  -5 -14 11024.5 395.756   5
  -3   5 -15 4470.66 167.064   3
  -3  -5 -15 4433.00 153.192   3
   3  -5  15 4629.59 187.584   2
  -3  -5 -15 4480.83 158.905   2
   3   5  15 4376.02 191.099   1
  -3   5 -15 4494.71 192.729  11
   3  -5  15 4488.89 181.989  11
  -3   5 -15 4402.54 180.651  10
   3   5  15 4611.14 229.320   5
   3  -5  15 4123.20 179.229   8
   3   5  15 4386.98 215.808   6
  -3  -5 -15 3989.58 188.016   7
  -3  -5 -15 4549.82 240.155   5
  -3  -5 -16 2168.60 101.179   3
   3  -5  16 2003.40 122.773   2
  -3  -5 -16 2085.54 106.348   2
  -3   5 -16 1926.26 107.232   3
   3   5  16 2203.31 161.474  10
  -3   5 -16 2069.46 131.739  11
   3  -5  16 2004.66 123.959  11
  -3   5 -16 1909.91 118.948  10
   3   5  16 1928.72 126.689   1
   3   5  16 1932.82 152.302   5
  -3  -5 -16 1887.31 129.788   7
   3   5  16 2005.66 148.180   6
  -3  -5 -16 1855.20 157.534   5
  -3   5 -17 16.5560 35.9208   3
  -3  -5 -17 41.2374 30.9967   3
   3   5  17 88.9309 60.9508  10
  -3   5 -17 8.56290 45.0230  10
   3  -5  17 58.4794 46.3857  11
  -3   5 -17 14.1100 46.1801  11
  -3  -5 -17 56.5280 36.2556   2
   3  -5  17-8.81256 42.6231   2
   3   5  17 69.2684 45.6329   1
  -3  -5 -17 40.1324 46.6513   7
   3   5  17 52.0074 60.9463   6
  -3  -5 -17 89.1015 65.4101   5
   3  -5  18 15717.4 431.025   2
  -3   5 -18 15823.2 396.195   3
  -3  -5 -18 15799.7 372.890   3
  -3  -5 -18 16061.3 397.491   2
   3   5  18 15617.3 492.156  10
  -3   5 -18 14446.2 422.523  10
   3  -5  18 15904.1 438.499  11
  -3   5 -18 15966.5 441.084  11
   3   5  18 15006.2 442.709   1
   3   5  18 15124.3 484.622   6
  -3  -5 -18 14829.2 443.184   7
  -3  -5 -18 15041.0 520.090   5
  -3   5 -19 2458.64 123.796   3
  -3  -5 -19 2387.35 123.947   2
  -3  -5 -19 2333.28 107.780   3
   3  -5  19 2359.66 140.912   2
  -3   5 -19 1851.84 130.465  10
   3   5  19 2224.32 170.294  10
   3  -5  19 2466.50 152.057  11
  -3   5 -19 2324.59 146.890  11
   3   5  19 2223.65 148.000   1
   3   5  19 2390.15 174.411   6
  -3  -5 -19 2409.20 156.008   7
  -3  -5 -19 2190.32 187.915   5
  -3  -5 -20 18693.2 430.477   3
  -3   5 -20 19019.8 459.796   3
   3  -5  20 19243.6 508.828   2
  -3  -5 -20 19768.1 472.905   2
   3   5  20 19661.9 569.049  10
  -3   5 -20 17134.9 490.077  10
   3  -5  20 18535.2 513.884  11
  -3   5 -20 20046.7 517.442  11
   3   5  20 16985.8 506.810   1
  -3  -5 -20 17908.2 519.551   7
   3   5  20 19221.0 571.304   6
  -3  -5 -20 18032.2 602.140   5
  -3   5 -21 67.0286 42.4547   3
  -3  -5 -21 104.649 38.3147   3
  -3   5 -21 84.2455 59.8252  10
   3   5  21 21.7507 70.6764  10
  -3   5 -21 84.6303 63.6240  11
  -3  -5 -21 80.1088 63.9819  11
   3   5  21 99.4882 56.6308   1
   3  -5  21 139.887 54.1549   2
  -3  -5 -21 127.072 50.7291   2
   3  -5  21 72.9552 49.8296   1
  -3  -5 -21 136.985 61.8411   7
   3   5  21 129.505 74.2589   6
  -3  -5 -21 125.999 76.5621   5
  -3   5 -22 1677.09 104.998   3
  -3  -5 -22 1511.96 85.7186   3
  -3  -5 -22 1740.56 113.143   2
   3  -5  22 1690.51 128.876   2
  -3   5 -22 1351.88 121.598  10
   3   5  22 1369.52 142.184  10
  -3  -5 -22 1707.26 140.832  11
  -3   5 -22 1668.14 128.941  11
   3  -5  22 1593.16 115.983   1
   3   5  22 1555.65 129.317   1
   3   5  22 1575.83 151.257   6
  -3  -5 -22 1439.37 129.417   7
  -3  -5 -22 1379.45 159.715   5
  -3   5 -23 648.076 93.1978  11
  -3   5 -23 423.440 83.5974  10
   3  -5  23 656.476 85.0489   1
  -3  -5 -23 632.047 58.9741   3
  -3   5 -23 651.886 70.9135   3
  -3   5 -24 4116.48 262.318   5
  -3   5 -24 3812.47 204.745  10
  -3   5 -24 4413.17 176.726   3
  -3  -5 -24 4303.52 150.046   3
   3  -5  24 4303.15 200.301   1
  -3   5 -25 390.462 64.3967   3
  -3  -5 -25 278.177 48.6681   3
   3  -5  25 304.620 68.8857   1
  -3   5 -26 11851.1 328.969   3
   3  -5  26 10922.2 362.568   1
  -3  -7  24 349.661 67.1133   8
  -3  -7  23 39.3340 51.9383   8
   3   7 -23 44.9816 60.9883  11
  -3  -7  23 7.96977 34.9372   1
   3   7 -23 26.8209 65.3450   5
   3   7 -22 3629.72 186.374  11
  -3  -7  22 3639.99 160.194   8
   3  -7 -22 3454.28 177.627   2
  -3  -7  22 3206.69 169.622   2
  -3  -7  22 3250.27 127.780   1
  -3  -7  21 107.105 61.2697   2
   3  -7 -21 52.9873 60.1819   2
  -3  -7  21 76.3865 38.6333   1
   3   7 -21 123.006 68.3271   5
   3   7 -21 140.100 65.9897  11
  -3  -7  21 231.590 59.5320   8
   3  -7 -21 96.0716 65.9379   7
   3   7 -21 111.563 66.7722   3
  -3  -7  20 15897.8 373.452   1
  -3   7  20 15830.2 467.005   1
   3   7 -20 17163.2 464.520  11
   3   7 -20 16011.7 478.323   5
  -3  -7  20 17188.6 424.913   8
   3  -7 -20 15489.3 475.379   7
  -3  -7  20 16673.8 447.200   2
   3  -7 -20 17443.1 457.670   2
   3   7 -20 17572.3 480.801   3
  -3  -7  19 420.729 66.9511   2
   3  -7 -19 328.730 67.2694   2
  -3  -7  19 339.550 42.7900   1
  -3   7  19 471.292 79.3665   1
   3   7 -19 404.910 71.0448  11
   3   7 -19 324.131 46.1753  10
   3   7 -19 345.877 73.6503   5
  -3  -7  19 331.044 61.0167   8
  -3   7  19 364.709 84.5273   6
   3  -7 -19 268.875 74.5397   7
   3   7 -19 445.536 79.0523   3
  -3  -7  18 1461.70 106.425   2
   3  -7 -18 1574.35 112.603   2
   3   7 -18 1760.82 127.092   3
  -3   7  18 1481.28 115.991   1
  -3  -7  18 1594.77 72.0359   1
   3   7 -18 1650.89 116.317  11
   3   7 -18 1394.68 77.4548  10
  -3  -7  18 1641.88 101.017   8
   3  -7 -18 1720.90 129.680   7
  -3   7  18 1499.43 139.655   6
  -3   7  18 1719.98 174.024   5
  -3   7  17 24.2013 43.5070   1
   3  -7 -17 12.6225 39.1239   2
  -3  -7  17-11.7529 22.6032   1
  -3  -7  17-7.78996 40.6916   2
   3   7 -17 104.174 44.4672  11
   3   7 -17 46.8737 29.2542  10
  -3   7  17 18.4193 63.9347   5
  -3  -7  17-50.8529 47.9278   8
  -3   7  17 26.8947 55.4601   6
   3  -7 -17-20.7650 52.8065   7
   3   7 -17 15.5897 49.8799   3
  -3  -7  16 4612.63 182.910   2
   3  -7 -16 4708.09 190.354   2
   3   7 -16 4994.54 215.309   3
  -3  -7  16 4652.59 123.705   1
  -3   7  16 4551.49 199.781   1
  -3  -7  16 4554.15 179.029  11
   3   7 -16 4872.32 198.154  11
   3   7 -16 4485.15 146.615  10
  -3   7  16 4803.39 141.754   4
  -3  -7  16 4745.31 176.036   8
   3   7 -16 4311.36 143.156   9
  -3   7  16 4280.20 224.588   6
   3  -7 -16 4130.95 198.383   7
  -3   7  16 4787.30 272.098   5
   3   7 -15 239.048 63.9842   3
  -3   7  15 194.066 58.0087   1
  -3  -7  15 256.611 53.0880   2
   3  -7 -15 316.965 57.1985   2
  -3  -7  15 186.477 23.8984   1
   3   7 -15 258.283 57.5515  11
  -3  -7  15 182.165 49.7570  11
   3   7 -15 218.617 39.5889  10
  -3   7  15 285.272 42.5979   4
  -3   7  15 235.738 85.1791   5
  -3  -7  15 193.134 49.5971   8
   3   7 -15 252.031 39.7360   9
   3  -7 -15 156.752 52.8995   7
  -3   7  15 195.913 69.0748   6
   3  -7 -15 371.488 86.8134   5
  -3  -7  14 19979.4 462.273   2
   3  -7 -14 20977.9 481.977   2
   3   7 -14 22452.8 528.394   3
  -3   7  14 19836.7 494.552   1
  -3  -7  14 16717.4 356.261   1
   3   7 -14 19857.4 484.870  11
  -3  -7  14 20073.4 453.880  11
   3   7 -14 19427.8 426.344  10
  -3   7  14 21145.7 430.706   4
   3   7 -14 19403.9 413.002   9
  -3  -7  14 20258.0 454.749   8
  -3   7  14 19644.3 542.031   6
   3  -7 -14 18954.2 496.720   7
   3  -7 -14 19370.8 565.171   5
  -3   7  14 20047.6 609.752   5
  -3  -7  13 1217.88 86.1620   2
   3   7 -13 1425.02 115.082   3
   3  -7 -13 1212.78 91.7007   2
  -3   7  13 1372.93 103.275   1
   3  -7 -13 1223.99 108.419   1
  -3  -7  13 1289.61 85.0706  11
   3   7 -13 1352.69 101.965  11
   3   7 -13 1128.63 75.1503  10
  -3   7  13 1205.90 80.6486   4
   3   7 -13 1212.04 68.7806   9
  -3  -7  13 1281.93 85.4049   8
  -3   7  13 1039.41 112.896   6
   3  -7 -13 1135.05 98.8826   7
   3  -7 -13 1187.88 127.829   5
  -3   7  13 1136.72 139.396   5
  -3  -7  12 37069.8 780.120   2
   3   7 -12 40241.9 856.514   3
   3  -7 -12 37076.3 801.303   2
  -3  -7  12 38080.0 768.077  11
   3   7 -12 37541.8 810.113  11
   3   7 -12 35186.7 759.678  10
   3  -7 -12 38635.7 842.310   1
  -3   7  12 36677.6 813.565   1
   3   7 -12 36316.2 740.776   9
   3   7 -12 39391.8 871.349   7
  -3  -7  12 37318.4 776.956   8
   3  -7 -12 36044.9 821.133   7
   3  -7 -12 37670.6 911.743   6
  -3   7  12 38364.7 952.667   5
   3  -7 -12 36357.3 891.432   5
   3   7 -12 36212.0 792.502   5
  -3  -7  11 12568.7 320.790   2
   3  -7 -11 12859.7 344.402   2
   3  -7 -11 12988.5 370.234   1
  -3   7  11 11867.9 345.651   1
  -3  -7  11 12519.6 308.897  11
   3   7 -11 12826.6 320.016  10
   3   7 -11 12377.2 296.187   9
   3   7 -11 13685.4 398.438   7
   3  -7 -11 12684.8 420.600   6
   3  -7 -11 12108.9 354.498   7
   3  -7 -11 12456.1 407.751   5
  -3   7  11 12807.3 450.212   5
   3   7 -11 12799.3 339.815   5
  -3  -7  10 595.045 55.5722   2
  -3   7  10 599.849 64.9584   1
   3  -7 -10 583.628 71.7477   1
  -3  -7  10 671.334 54.5664  11
   3   7 -10 656.730 60.0604  10
  -3  -7  10 667.130 67.9365   3
   3   7 -10 587.461 49.6641   9
   3   7 -10 674.595 86.2614   7
   3  -7 -10 614.555 70.1158   7
   3  -7 -10 609.817 86.5076   5
  -3   7  10 581.694 98.3165   5
   3   7 -10 517.005 60.1965   5
   3  -7 -10 605.930 88.0542   6
  -3  -7   9 135.303 38.2875   3
   3  -7  -9 142.185 44.8809   3
  -3   7   9 178.898 42.3732   1
   3  -7  -9 190.216 48.4116   1
  -3  -7   9 108.889 30.7185   2
  -3  -7   9 192.720 33.4711  11
   3   7  -9 136.335 31.9822   9
   3  -7  -9 147.094 44.5247   7
   3   7  -9 229.074 56.8747   7
   3   7  -9 79.1947 35.6650   5
  -3   7   9 73.2922 57.2756   5
   3  -7  -9 143.893 53.1824   5
   3  -7  -9 114.808 56.7021   6
   3  -7  -8 4018.37 178.206   3
  -3  -7   8 4160.44 141.554   2
  -3   7   8 4251.21 163.201   1
   3  -7  -8 4479.55 179.184   1
  -3  -7   8 4358.29 140.451  11
   3   7  -8 4497.34 144.188   9
  -3  -7   8 4071.16 171.534   3
   3  -7  -8 4517.18 217.732   6
   3  -7  -8 4153.68 171.201   7
   3   7  -8 4636.30 199.276   7
   3   7  -8 4192.20 165.028   5
  -3   7   8 4540.06 235.894   5
   3  -7  -8 4399.69 208.445   5
   3   7  -7 8505.97 275.144   3
   3  -7  -7 8109.66 270.107   3
  -3  -7   7 8256.39 216.696   2
  -3  -7   7 8348.68 218.585  11
  -3  -7   7 7825.59 257.026   3
  -3   7   7 7909.63 242.198   1
   3  -7  -7 8786.56 264.308   1
  -3   7   7 7946.29 284.073   8
   3   7  -7 8977.11 290.068   7
   3  -7  -7 8181.70 255.759   7
   3  -7  -7 8485.41 312.029   6
  -3   7   7 8280.93 329.726   5
   3   7  -7 8110.32 253.110   5
   3  -7  -7 8286.58 296.609   5
   3   7  -6 21084.9 510.203   3
  -3  -7   6 19935.4 430.137   2
  -3  -7   6 20523.7 440.983  11
  -3  -7   6 19169.5 486.898   3
   3  -7  -6 20249.7 485.022   1
  -3   7   6 19462.1 462.085   1
  -3   7   6 19562.4 517.819   8
   3   7  -6 21463.1 521.214   7
   3  -7  -6 19933.4 481.352   7
   3  -7  -6 20690.3 553.850   6
   3  -7  -6 19738.0 530.696   5
  -3   7   6 20176.5 578.796   5
   3   7  -6 20509.0 487.447   5
   3   7  -5 65355.7 1296.08   3
  -3  -7   5 64312.7 1202.49   2
  -3  -7   5 63638.5 1220.90  11
  -3  -7   5 59972.1 1273.55   3
  -3   7   5 62144.2 1306.43   8
   3  -7  -5 60713.6 1312.15   5
   3   7  -5 62788.3 1272.75   5
  -3   7   5 63312.9 1380.82   5
   3  -7  -5 64263.9 1266.33   7
   3  -7  -5 64309.4 1347.53   6
   3   7  -5 66519.7 1304.77   7
  -3  -7   5 62457.1 1245.99   6
  -3   7   5 60943.7 1235.46   1
   3  -7  -5 64414.8 1264.85   1
   3   7  -4 61628.7 1252.47   3
  -3  -7   4 61956.3 1159.47   2
  -3   7   4 59840.0 1195.37   1
  -3  -7   4 61407.5 1188.24  11
   3   7  -4 60070.8 1185.23   8
  -3   7   4 60821.2 1264.43   8
  -3   7   4 62095.0 1216.89   7
   3   7  -4 63846.4 1262.40   7
   3  -7  -4 59090.0 1221.53   7
   3  -7  -4 63366.6 1308.77   6
  -3   7   4 60806.7 1331.27   5
   3   7  -4 61305.3 1241.24   5
   3  -7  -4 60636.2 1275.56   5
  -3  -7   3 3048.85 96.5416   2
   3   7  -3 3284.57 152.670   3
  -3   7   3 3036.93 119.348   1
   3   7  -3 2998.93 118.191   8
  -3   7   3 2941.24 151.799   8
   3  -7  -3 3017.93 160.725  11
  -3  -7   3 3410.15 124.245  11
   3   7  -3 3079.19 150.336   7
   3  -7  -3 3190.48 173.834   6
   3  -7  -3 3258.46 140.149   7
  -3   7   3 3220.09 134.789   7
   3  -7  -3 3099.66 159.948   5
  -3   7   3 3121.21 185.180   5
   3   7  -3 3084.36 147.024   5
   3  -7  -2 3678.34 168.116   3
   3   7  -2 3905.68 167.514   3
  -3  -7   2 3921.29 108.001   2
   3  -7  -2 3621.15 176.502  11
  -3  -7   2 4107.33 145.147  11
  -3   7   2 3696.29 169.079   8
   3  -7  -2 3888.04 153.777   7
   3   7  -2 3975.95 141.528   8
  -3   7   2 4137.13 150.954   7
   3  -7  -2 3922.75 190.036   6
   3   7  -2 3997.98 171.106   7
  -3   7   2 3834.24 201.392   5
   3   7  -2 3639.29 165.886   5
  -3  -7   1 3874.97 104.167   2
   3   7  -1 4174.89 170.425   3
   3  -7  -1 3616.55 166.103   3
   3  -7  -1 4235.01 146.059   1
  -3  -7   1 3875.88 145.512  11
   3  -7  -1 3728.40 174.454  11
  -3   7   1 3688.62 166.568   8
   3   7  -1 3860.20 142.988   8
   3  -7  -1 3804.35 184.990   6
   3   7  -1 3988.79 169.690   7
  -3   7   1 4064.52 149.263   7
  -3   7   1 3654.40 195.149   5
   3   7  -1 3870.32 172.523   5
  -3  -7   0 1159.44 87.7445   3
   3  -7   0 1087.82 90.6336   3
   3  -7   0 1257.02 74.7445   1
  -3  -7   0 1245.44 82.9226  11
   3  -7   0 1276.28 100.608  11
   3   7   0 1234.67 80.5627   8
  -3   7   0 1108.63 88.5976   8
   3  -7   0 1235.84 105.552   6
   3   7   0 1335.40 96.2215   7
  -3   7   0 1203.43 78.2513   7
   3   7   0 1219.69 96.3343   5
  -3   7   0 1166.47 110.940   5
   3  -7   1 20472.1 515.465   3
  -3  -7  -1 20719.4 500.396   3
   3  -7   1 21985.0 463.807   1
   3   7   1 20353.1 415.595   1
   3  -7   1 21063.3 520.863  11
  -3  -7  -1 20476.5 487.995  11
  -3  -7  -1 20410.1 512.740   7
  -3   7  -1 20625.8 506.265   8
   3   7   1 20736.0 485.497   8
  -3   7  -1 21520.7 479.655   7
   3   7   1 21790.0 513.453   7
   3  -7   1 21437.9 542.189   6
  -3  -7  -1 21743.8 492.460   5
   3   7   1 20613.9 527.113   5
  -3   7  -1 20289.8 554.893   5
   3  -7   2 26762.4 639.301   3
  -3  -7  -2 27893.8 627.039   3
   3  -7   2 27942.3 642.914  11
   3   7   2 26475.0 551.131   1
   3  -7   2 27188.3 579.909   1
   3   7   2 27574.4 619.702   8
  -3  -7  -2 28153.2 647.528   7
  -3   7  -2 27210.4 630.777   8
  -3   7  -2 30359.6 610.031   7
   3   7   2 29445.1 644.038   7
  -3   7  -2 26511.7 675.958   5
  -3  -7  -2 28558.6 625.800   5
   3   7   2 27761.0 663.416   5
  -3  -7  -3 15874.1 314.400   2
   3  -7   3 15387.9 413.515   3
  -3  -7  -3 16002.1 403.898   3
   3  -7   3 15311.8 410.467  11
   3   7   3 15667.4 434.990   4
   3  -7   3 15586.1 356.817   1
   3   7   3 15078.6 345.216   1
  -3   7  -3 15469.9 403.767   8
   3   7   3 15343.4 401.305   8
  -3  -7  -3 15814.0 419.380   7
  -3  -7  -3 15793.2 410.192   6
   3   7   3 15889.8 413.684   7
  -3   7  -3 16295.3 385.874   7
   3   7   3 15899.0 442.204   5
  -3   7  -3 15170.8 444.612   5
  -3  -7  -3 15808.4 409.655   5
  -3  -7  -4 11048.2 231.944   2
   3  -7   4 10945.0 324.546   3
  -3  -7  -4 10990.6 312.618   3
   3  -7   4 10774.8 318.084  11
   3   7   4 11323.8 342.906   4
   3   7   4 10771.3 266.980   1
   3  -7   4 11275.0 270.999   1
  -3   7  -4 10529.8 310.157   8
   3   7   4 11587.6 327.129   7
  -3  -7  -4 11109.7 330.372   7
  -3  -7  -4 11054.7 327.064   6
  -3   7  -4 11223.0 297.648   7
  -3  -7  -4 11216.0 327.321   5
  -3   7  -4 10724.2 349.584   5
   3   7   4 11014.8 353.302   5
   3  -7   5 59.0734 36.6549   3
  -3  -7  -5 101.251 39.2474   3
   3   7   5 155.603 32.3696   1
   3  -7   5 135.160 29.3029   1
  -3  -7  -5 64.4461 17.3562   2
   3  -7   5 114.174 43.5571  11
   3   7   5 156.268 53.4454   4
   3  -7   5 86.9657 47.7556   8
   3   7   5 83.0334 40.5266   7
  -3  -7  -5 20.7961 36.7584   7
  -3   7  -5 91.1043 32.4867   7
  -3   7  -5 118.491 49.9017   5
   3   7   5 93.5439 44.6453   5
  -3  -7  -5 58.4266 41.0034   5
  -3  -7  -6 423.088 30.4182   2
   3  -7   6 314.134 53.8168   3
  -3  -7  -6 360.112 53.4970   3
   3  -7   6 461.215 41.5533   1
   3   7   6 420.340 47.0134   1
   3  -7   6 420.420 56.6011  11
  -3   7  -6 355.366 59.3685  10
   3   7   6 399.119 64.1089   4
   3  -7   6 424.818 68.1890   8
   3   7   6 450.888 61.6408   7
  -3  -7  -6 375.462 60.7264   7
  -3   7  -6 418.636 52.2283   7
   3   7   6 456.191 72.6694   5
  -3  -7  -6 362.880 60.7987   5
  -3   7  -6 580.099 76.2557   5
   3  -7   7 90.0860 40.1170   3
  -3  -7  -7 34.6296 32.9865   3
  -3  -7  -7 16.0273 15.6104   2
   3   7   7 41.5940 28.2108   1
   3  -7   7 38.6823 24.2651   1
   3  -7   7 20.6009 31.6675  11
  -3   7  -7 3.95420 40.5002  10
   3   7   7 68.7921 43.7380   4
   3   7   7-34.1091 53.2948   5
   3  -7   7-8.92004 43.1408   8
  -3  -7  -7 21.6052 38.1555   7
  -3   7  -7 3.24830 31.8943   7
   3   7   7 18.2950 43.5654   6
  -3  -7  -7 144.447 47.9636   5
  -3   7  -7 48.4196 43.1414   5
   3  -7   8 5408.68 206.691   3
  -3  -7  -8 5436.55 145.604   2
  -3  -7  -8 5573.65 199.229   3
   3   7   8 5463.47 187.920   1
   3  -7   8 5638.62 162.518   1
   3  -7   8 5600.54 199.596  11
  -3   7  -8 5437.16 210.252  10
   3   7   8 5694.83 216.167   4
   3  -7   8 5712.71 220.294   8
   3   7   8 5355.38 222.746   6
  -3   7  -8 5931.56 202.167   7
  -3  -7  -8 5448.27 216.416   7
  -3  -7  -8 5087.15 226.453   5
   3   7   8 5133.18 240.567   5
  -3   7  -8 5323.39 223.648   5
  -3  -7  -9 432.241 38.3499   2
   3  -7   9 375.110 62.2978   3
  -3  -7  -9 433.189 59.0821   3
   3   7   9 435.240 56.5230   1
   3  -7   9 539.947 45.9542   1
  -3   7  -9 438.349 74.3747  11
   3  -7   9 476.441 59.9581  11
  -3   7  -9 378.288 65.4936  10
   3   7   9 465.417 68.0136   4
   3   7   9 407.763 80.6472   5
  -3   7  -9 491.916 62.6317   7
   3  -7   9 692.313 78.0614   8
  -3   7  -9 439.212 22.6024   9
  -3  -7  -9 476.103 70.0228   7
   3   7   9 373.916 70.8771   6
  -3  -7  -9 494.976 80.2487   5
  -3   7  -9 414.793 69.9458   5
  -3  -7 -10 39762.8 800.970   2
  -3  -7 -10 41840.3 874.225   3
   3   7  10 39945.3 868.378   1
  -3   7 -10 42387.8 936.316  11
   3  -7  10 41158.3 869.166  11
  -3   7 -10 38848.8 882.499  10
   3  -7  10 39148.4 876.961   3
   3   7  10 42722.3 896.946   4
   3  -7  10 43516.9 918.461   8
  -3   7 -10 43452.8 890.049   7
  -3  -7 -10 41888.1 913.002   7
   3   7  10 40672.0 927.179   6
  -3  -7 -10 39991.3 942.994   5
   3   7  10 40125.6 965.800   5
   3  -7  11 7451.63 246.039   2
  -3  -7 -11 7545.59 241.801   3
  -3  -7 -11 7295.02 195.854   2
   3   7  11 7086.26 243.034   1
   3  -7  11 7562.15 242.960  11
  -3   7 -11 7676.14 283.508  11
  -3   7 -11 7195.39 252.366  10
   3   7  11 7803.47 257.606   4
   3  -7  11 7382.21 247.872   3
   3  -7  11 7668.14 269.056   8
  -3   7 -11 7630.81 254.497   7
   3   7  11 6919.43 276.008   6
  -3  -7 -11 6924.87 263.014   7
  -3  -7 -11 6947.33 289.535   5
   3   7  11 6975.87 299.919   5
   3  -7  12 21564.1 525.747   2
  -3  -7 -12 22020.7 517.422   3
   3   7  12 21093.7 530.018   1
  -3   7 -12 23660.9 585.887  11
   3  -7  12 21843.5 521.456  11
  -3   7 -12 21092.5 531.343  10
   3   7  12 20970.8 609.967   5
   3   7  12 21879.7 533.621   4
   3  -7  12 20944.6 520.772   3
   3  -7  12 22216.1 557.144   8
  -3  -7 -12 21410.0 560.519   7
   3   7  12 21635.0 580.950   6
  -3  -7 -12 20256.8 591.507   5
  -3  -7 -13 21879.6 511.450   3
   3  -7  13 20826.5 520.799   2
   3   7  13 20333.6 524.500   1
   3  -7  13 22093.0 519.579  11
  -3   7 -13 23025.4 577.677  11
  -3   7 -13 20211.8 522.137  10
   3  -7  13 20581.0 512.240   3
   3   7  13 21811.7 614.826   5
   3   7  13 21999.3 527.080   4
   3  -7  13 21212.6 548.434   8
   3   7  13 20631.9 576.732   6
  -3  -7 -13 21202.1 555.297   7
  -3  -7 -13 20138.1 597.898   5
  -3   7 -14 1877.02 115.913   3
   3  -7  14 1745.88 115.107   2
  -3  -7 -14 1812.73 90.2675   2
  -3  -7 -14 1690.43 105.167   3
   3   7  14 1576.79 115.468   1
  -3   7 -14 1645.40 130.529  11
   3  -7  14 1852.21 115.608  11
  -3   7 -14 1523.67 109.092  10
   3   7  14 1707.33 151.363   5
   3  -7  14 1525.56 102.513   3
   3   7  14 1629.62 112.305   4
   3  -7  14 1720.23 126.097   8
  -3  -7 -14 1578.91 123.598   7
   3   7  14 1616.94 135.448   6
  -3  -7 -14 1853.07 152.959   5
  -3   7 -15 5988.02 220.654   3
   3  -7  15 5818.07 225.684   2
  -3  -7 -15 6118.45 213.517   3
  -3  -7 -15 6300.21 189.840   2
   3   7  15 5727.79 232.381   1
   3  -7  15 5859.08 220.136  11
  -3   7 -15 6304.66 256.659  11
  -3   7 -15 5564.89 219.415  10
   3  -7  15 5675.89 209.467   3
   3   7  15 5724.49 217.148   4
   3   7  15 5757.10 279.633   5
   3  -7  15 6437.09 245.453   8
   3   7  15 5649.16 258.960   6
  -3  -7 -15 5727.62 243.416   7
  -3  -7 -15 6054.60 286.903   5
   3  -7  16 2240.60 137.431   2
  -3   7 -16 2362.87 132.896   3
  -3  -7 -16 2169.95 105.837   2
  -3  -7 -16 2303.90 122.235   3
   3   7  16 1964.57 137.132   1
  -3   7 -16 2240.26 155.574  11
   3  -7  16 2174.64 132.968  11
  -3   7 -16 2023.92 127.122  10
   3   7  16 2333.47 178.701   5
   3   7  16 2303.34 131.557   4
   3  -7  16 2210.51 141.438   8
  -3  -7 -16 2167.84 147.668   7
   3   7  16 2339.74 167.385   6
  -3  -7 -16 2168.51 176.057   5
  -3   7 -17 6263.28 227.423   3
  -3  -7 -17 6110.79 198.200   2
   3  -7  17 5756.46 232.296   2
  -3  -7 -17 6058.78 212.535   3
   3   7  17 5715.53 241.140   1
  -3   7 -17 6488.96 264.932  11
   3  -7  17 6148.66 234.776  11
  -3   7 -17 5473.39 221.860  10
   3   7  17 5933.47 291.989   5
   3   7  17 5846.58 217.995   4
   3  -7  17 6269.09 245.612   8
  -3  -7 -17 5787.61 251.715   7
   3   7  17 5553.20 268.088   6
  -3  -7 -17 6051.23 299.199   5
  -3  -7 -18 18020.6 439.566   2
   3  -7  18 18559.3 496.841   2
  -3  -7 -18 19227.0 460.479   3
  -3   7 -18 19072.9 480.886   3
   3   7  18 17704.3 504.775   1
   3  -7  18 19000.6 498.302  11
  -3   7 -18 19826.0 534.604  11
   3   7  18 18782.0 592.876  10
  -3   7 -18 16554.6 473.041  10
   3   7  18 18348.9 579.589   5
   3  -7  18 18676.3 500.291   8
  -3  -7 -18 17719.0 515.571   7
   3   7  18 17671.4 550.369   6
  -3  -7 -18 17942.1 586.540   5
  -3   7 -19 6703.04 238.917   3
  -3  -7 -19 6498.23 214.026   2
   3  -7  19 6451.54 252.500   2
  -3  -7 -19 6605.50 222.397   3
   3   7  19 6201.81 258.989   1
   3  -7  19 6274.53 214.743   1
  -3   7 -19 6908.58 279.454  11
   3  -7  19 6241.40 253.969  11
  -3   7 -19 5493.11 230.422  10
   3   7  19 6501.37 314.303   5
   3  -7  19 6479.78 253.714   8
  -3  -7 -19 5978.81 262.297   7
   3   7  19 6028.75 288.369   6
  -3  -7 -19 5590.07 305.906   5
  -3  -7 -20 11060.9 308.724   2
  -3   7 -20 11502.1 333.673   3
  -3  -7 -20 10642.6 306.663   3
   3  -7  20 10923.7 351.257   2
   3  -7  20 10846.4 356.460  11
  -3   7 -20 11472.7 383.402  11
  -3   7 -20 9331.23 326.390  10
   3   7  20 10079.2 358.641   1
   3  -7  20 10702.1 306.821   1
   3  -7  20 10426.1 344.347   8
   3   7  20 10453.5 400.634   6
  -3  -7 -20 9839.24 422.838   5
  -3   7 -21 310.179 73.9106  10
   3  -7  21 379.024 81.2305   8
   3  -7  21 297.882 60.8092   1
  -3  -7 -21 381.857 61.9484   2
  -3  -7 -21 363.010 60.9839   3
  -3   7 -21 329.025 67.9825   3
   3  -7  21 372.598 78.9691  11
  -3  -7 -22 183.328 53.8470   2
   3  -7  22 163.521 53.1791   1
  -3  -7 -22 179.566 49.3412   3
  -3   7 -22 163.352 59.3165   3
   3  -7  23 2053.61 126.618   1
  -3   7 -23 2230.62 135.370   3
  -3  -7 -23 2439.25 123.261   3
   3  -7  24 1786.20 122.975   1
  -3   7 -24 2066.90 133.226   3
  -3  -9  20 4671.86 202.055   2
   3  -9 -20 4977.55 210.831   2
  -3  -9  19 2992.52 154.546   2
   3  -9 -19 3172.65 162.262   2
  -3  -9  18 1023.25 88.4906   8
   3  -9 -18 1170.05 99.6499   2
  -3  -9  18 1185.32 99.4560   2
  -3  -9  17 150.334 50.3669  11
   3  -9 -17 183.974 56.5763   2
  -3   9  17 179.562 60.6370   1
  -3  -9  17 159.142 54.7127   2
  -3  -9  17 165.667 49.2954   8
   3  -9 -17 219.099 65.9137   7
   3  -9 -17 158.979 60.5396   3
  -3  -9  16 1869.32 111.610  11
  -3   9  16 1867.18 98.0062   4
  -3   9  16 1658.89 120.492   1
  -3  -9  16 1923.99 112.212   8
   3  -9 -16 1735.89 133.101   7
   3  -9 -16 1759.43 115.014   2
   3  -9 -16 1851.89 140.469   3
  -3  -9  16 1714.48 108.767   2
   3  -9 -15 3501.46 189.265   3
   3  -9 -15 3552.42 163.121   2
  -3  -9  15 3406.77 153.038   2
  -3  -9  15 3537.46 153.108  11
  -3   9  15 3435.13 171.255   1
  -3   9  15 3767.33 148.065   4
   3  -9 -15 3363.71 180.740   7
   3   9 -15 3851.87 180.578   5
   3  -9 -14 6616.68 269.332   3
  -3  -9  14 6580.17 223.982   2
   3  -9 -14 7361.75 244.229   2
  -3   9  14 6550.18 247.251   1
  -3  -9  14 7248.04 225.753  11
   3   9 -14 6419.41 215.910  10
  -3   9  14 7367.37 225.595   4
   3   9 -14 7801.08 305.530   7
   3  -9 -14 7018.71 267.630   7
   3  -9 -14 6601.15 302.271   5
   3   9 -14 7177.58 255.071   5
   3  -9 -13 12413.3 390.399   3
  -3  -9  13 12664.3 332.529   2
   3  -9 -13 12810.4 350.558   2
  -3   9  13 11953.4 356.451   1
  -3  -9  13 12613.4 323.979  11
   3   9 -13 11303.0 323.812  10
  -3   9  13 12905.1 341.131   4
   3   9 -13 12065.1 293.458   9
   3   9 -13 13354.8 420.846   7
   3  -9 -13 12079.1 374.616   7
  -3   9  13 12652.8 483.074   5
   3   9 -13 12288.6 363.148   5
   3  -9 -13 11633.8 420.074   5
   3  -9 -12 5694.24 241.222   3
   3   9 -12 6091.35 248.469   3
  -3  -9  12 5582.73 191.232   2
   3  -9 -12 5860.69 210.251   2
  -3   9  12 5566.03 215.190   1
  -3  -9  12 5915.43 189.712  11
   3   9 -12 5479.38 199.399  10
  -3   9  12 6035.12 211.315   4
   3   9 -12 5355.85 166.943   9
   3  -9 -12 5828.70 289.903   6
   3   9 -12 6473.88 267.854   7
   3  -9 -12 5683.03 230.945   7
  -3   9  12 5814.25 314.238   5
   3   9 -12 5528.88 221.372   5
   3  -9 -12 5468.22 263.954   5
   3  -9 -11 1868.19 134.192   3
  -3  -9  11 2043.28 105.443   2
   3  -9 -11 2103.81 120.502   2
  -3   9  11 2120.83 122.724   1
  -3  -9  11 2092.62 103.279  11
   3   9 -11 1989.08 117.826  10
  -3  -9  11 2052.21 130.819   3
  -3   9  11 2294.14 128.770   4
   3   9 -11 2043.85 94.4981   9
  -3   9  11 2179.14 157.320   8
   3   9 -11 2328.90 155.417   7
   3  -9 -11 2011.12 130.546   7
   3  -9 -11 2060.28 170.223   6
  -3   9  11 2218.14 190.155   5
   3  -9 -11 2204.71 162.211   5
   3   9 -11 2108.96 130.719   5
   3  -9 -10 4328.29 205.466   3
  -3  -9  10 4430.97 156.319   2
  -3   9  10 4030.31 170.972   1
  -3  -9  10 4320.89 153.501  11
   3   9 -10 4465.43 177.809  10
   3   9 -10 4257.00 147.180   9
  -3  -9  10 4177.24 188.429   3
  -3   9  10 4879.62 193.251   4
  -3   9  10 4240.40 218.313   8
   3  -9 -10 4788.16 250.044   6
   3  -9 -10 4160.10 189.884   7
   3   9 -10 4507.34 216.126   7
  -3  -9  10 4349.40 173.865   6
   3   9 -10 4311.80 191.232   5
  -3   9  10 4786.91 271.217   5
   3  -9 -10 4253.70 219.974   5
   3  -9  -9 26.3961 45.3270   3
  -3  -9   9 81.1784 45.5637   3
  -3   9   9 17.5129 36.1179   1
  -3  -9   9 32.6834 28.8707   2
   3  -9  -9 33.4315 41.9262   1
  -3  -9   9 27.6439 30.0741  11
  -3   9   9 31.0926 43.9309   4
   3   9  -9 47.2506 32.5733   9
  -3   9   9 29.6562 56.4949   8
  -3  -9   9 49.7893 37.1582   6
   3  -9  -9 22.8335 45.4921   7
   3   9  -9 22.0438 47.3164   7
   3   9  -9-4.60456 44.2009   5
  -3   9   9 8.87638 69.3005   5
   3  -9  -9 36.2442 61.6345   6
   3  -9  -9 18.4201 52.2074   5
   3   9  -8 1575.78 118.703   3
  -3  -9   8 1339.86 76.7944   2
   3  -9  -8 1094.57 105.021   3
   3  -9  -8 1370.25 99.8612   1
  -3   9   8 1351.22 90.2700   1
  -3  -9   8 1244.50 77.6426  11
   3   9  -8 1367.27 82.6051   9
  -3  -9   8 1242.70 101.411   3
  -3   9   8 1286.90 118.938   8
  -3  -9   8 1344.72 95.1148   6
   3  -9  -8 1381.22 134.673   6
   3  -9  -8 1295.21 102.843   7
   3   9  -8 1403.02 118.087   7
  -3   9   8 1477.21 153.034   5
   3  -9  -8 1523.44 127.712   5
   3   9  -8 1257.92 103.708   5
   3   9  -7 1482.51 118.033   3
  -3  -9   7 1353.87 73.8010   2
   3  -9  -7 1310.31 113.839   3
  -3  -9   7 1399.51 81.8542  11
  -3  -9   7 1217.03 101.365   3
   3  -9  -7 1503.87 104.812   1
  -3   9   7 1376.81 91.6585   1
  -3   9   7 1339.54 120.447   8
   3  -9  -7 1303.35 104.081   7
  -3  -9   7 1277.59 93.8836   6
   3  -9  -7 1280.64 131.040   6
   3   9  -7 1534.55 122.415   7
  -3   9   7 1319.21 144.270   5
   3   9  -7 1378.06 110.097   5
   3  -9  -7 1371.23 121.105   5
   3   9  -6 13256.5 389.252   3
  -3  -9   6 12499.8 296.866   2
   3  -9  -6 12155.4 385.845   3
  -3  -9   6 12441.8 318.708  11
   3  -9  -6 12328.1 406.230  11
  -3  -9   6 12332.0 368.199   3
  -3   9   6 12228.5 392.893   8
   3   9  -6 12264.6 376.404   5
  -3   9   6 12587.2 456.935   5
   3  -9  -6 12826.8 401.661   5
   3  -9  -6 12976.4 433.220   6
  -3  -9   6 13008.6 351.807   6
   3  -9  -6 12844.6 367.150   7
   3   9  -6 13908.3 400.112   7
  -3   9   6 12515.0 329.460   1
   3  -9  -6 12638.5 349.514   1
  -3  -9   5 1993.82 83.9532   2
   3   9  -5 2237.20 140.010   3
   3  -9  -5 2002.51 114.203   1
  -3  -9   5 1935.31 101.657  11
   3  -9  -5 1900.13 145.260  11
  -3   9   5 2015.57 143.931   8
   3  -9  -5 1931.13 122.896   7
   3   9  -5 2342.69 145.924   7
   3  -9  -5 1932.73 156.815   6
  -3  -9   5 1781.67 112.789   6
  -3   9   5 2206.60 176.937   5
   3   9  -5 1798.37 130.025   5
  -3  -9   4 14243.7 320.895   2
   3  -9  -4 15365.2 380.252   1
   3  -9  -4 14928.9 445.465  11
  -3  -9   4 14280.8 360.178  11
  -3   9   4 13952.9 423.323   8
   3  -9  -4 13963.2 391.787   7
   3   9  -4 15210.9 428.940   7
  -3  -9   4 14601.4 390.577   6
   3  -9  -4 15422.5 471.349   6
  -3   9   4 14731.0 495.444   5
   3   9  -4 14916.9 427.101   5
  -3  -9   3 17113.3 364.816   2
   3  -9  -3 16571.0 484.241  11
  -3  -9   3 17263.8 419.134  11
   3  -9  -3 17316.2 420.859   1
   3   9  -3 17267.3 416.674   8
  -3   9   3 17018.8 475.636   8
  -3   9   3 17965.3 442.619   7
  -3  -9   3 17633.7 446.572   6
   3   9  -3 17914.0 476.428   7
   3  -9  -3 16637.1 508.773   6
  -3   9   3 17085.2 542.366   5
   3   9  -3 17582.7 483.778   5
  -3  -9   2 2008.30 75.0734   2
  -3  -9   2 1949.02 107.302  11
   3  -9  -2 1955.70 140.865  11
  -3  -9   2 1899.27 126.682   3
   3  -9  -2 1959.87 104.174   1
   3   9  -2 2215.13 113.758   8
  -3   9   2 1929.92 134.808   8
  -3   9   2 2409.18 127.660   7
   3  -9  -2 1966.47 150.568   6
  -3  -9   2 2261.56 128.298   6
   3   9  -2 2102.77 136.550   7
  -3   9   2 1971.65 162.490   5
   3   9  -2 2373.19 146.285   5
  -3  -9   1 1066.06 49.2272   2
   3  -9  -1 1076.24 101.554   3
  -3  -9   1 1137.84 97.4164   3
  -3  -9   1 972.135 80.5169  11
   3  -9  -1 1148.37 106.829  11
  -3   9   1 1222.14 103.658   8
   3   9  -1 1068.20 82.4855   8
   3  -9  -1 880.616 111.606   6
  -3  -9   1 952.017 89.9114   6
  -3   9   1 1027.18 86.6371   7
   3   9  -1 1068.04 100.521   7
   3   9  -1 1097.61 107.535   5
  -3   9   1 1097.69 126.485   5
  -3  -9   0 4181.58 111.070   2
   3  -9   0 4132.85 194.839   3
  -3  -9   0 3990.22 184.460   3
  -3   9   0 4153.07 190.763   8
   3   9   0 4290.43 171.438   8
   3  -9   0 4615.51 205.805  11
  -3  -9   0 4569.32 178.720  11
  -3   9   0 4336.94 174.470   7
  -3  -9   0 4192.72 184.637   6
   3  -9   0 4460.26 222.617   6
   3   9   0 4527.81 199.862   7
   3   9   0 4392.63 210.742   5
  -3   9   0 4524.93 241.738   5
  -3  -9  -1 4234.74 187.818   3
   3  -9   1 3796.95 187.274   3
  -3  -9  -1 3892.35 101.423   2
  -3  -9  -1 4017.42 172.636  11
   3  -9   1 3921.62 188.171  11
  -3   9  -1 3682.81 178.965   8
   3   9   1 3872.99 169.573   8
   3   9   1 4171.29 190.020   7
  -3  -9  -1 4060.59 183.633   6
  -3   9  -1 4033.93 167.300   7
   3  -9   1 4152.55 213.316   6
  -3   9  -1 3904.31 225.184   5
   3   9   1 3783.69 201.510   5
  -3  -9  -2 18026.9 370.751   2
  -3  -9  -2 19003.9 374.887   2
  -3  -9  -2 19508.5 497.891   3
   3  -9   2 18015.2 503.346   3
   3  -9   2 19237.9 504.775  11
  -3  -9  -2 19228.1 486.191  11
   3   9   2 19454.4 542.977   4
   3  -9   2 19784.4 428.061   1
  -3   9  -2 19278.5 494.183   8
   3   9   2 18958.9 479.820   8
   3  -9   2 19524.3 540.220   6
  -3   9  -2 20221.9 472.049   7
  -3  -9  -2 19130.5 499.443   6
   3   9   2 20185.0 509.961   7
  -3   9  -2 18958.6 563.649   5
   3   9   2 19287.7 539.055   5
   3  -9   3 15516.4 446.352   3
  -3  -9  -3 15126.9 315.596   2
  -3  -9  -3 16002.4 435.918   3
  -3  -9  -3 16554.5 434.906  11
   3  -9   3 16362.6 442.012  11
   3   9   3 16475.4 481.098   4
   3   9   3 15587.8 338.942   1
   3  -9   3 16109.7 364.256   1
  -3  -9  -3 15678.7 447.136   7
  -3   9  -3 15357.6 426.962   8
   3   9   3 15638.0 425.920   8
  -3   9  -3 16736.1 413.557   7
  -3  -9  -3 16816.1 449.985   6
   3   9   3 16792.0 448.792   7
   3  -9   3 16195.8 475.927   6
  -3  -9  -3 17362.5 436.017   5
  -3   9  -3 15695.3 499.989   5
   3   9   3 16026.6 481.840   5
  -3  -9  -4 17926.9 473.609   3
   3  -9   4 17419.9 483.050   3
  -3  -9  -4 17289.2 350.839   2
   3  -9   4 18029.4 396.974   1
   3   9   4 17970.4 388.325   1
   3  -9   4 18382.3 476.969  11
   3   9   4 18048.5 512.979   4
  -3  -9  -4 17785.1 490.437   7
   3   9   4 18105.1 474.806   8
  -3   9  -4 18250.4 449.283   7
   3   9   4 18513.9 487.342   7
  -3  -9  -4 18778.2 493.121   6
   3  -9   4 17910.4 510.761   6
  -3  -9  -4 18166.6 472.235   5
   3   9   4 17834.1 524.768   5
  -3   9  -4 17808.2 537.397   5
  -3  -9  -5 11152.3 240.594   2
  -3  -9  -5 11914.2 352.318   3
   3  -9   5 11349.5 359.349   3
   3   9   5 11578.3 285.167   1
   3  -9   5 12285.5 282.430   1
   3  -9   5 12019.0 351.117  11
  -3   9  -5 11670.4 363.044  10
   3   9   5 12868.9 396.127   4
   3   9   5 11844.3 361.204   8
  -3   9  -5 12514.0 338.098   7
  -3  -9  -5 11558.9 369.687   7
   3   9   5 12073.5 367.243   7
  -3   9  -5 11715.3 405.255   5
   3   9   5 12456.7 408.301   5
  -3  -9  -5 11601.3 354.358   5
  -3  -9  -6 3400.70 94.0565   2
   3  -9   6 3709.37 182.718   3
  -3  -9  -6 3472.35 169.342   3
   3   9   6 3609.01 133.655   1
   3  -9   6 3650.29 121.090   1
   3  -9   6 3649.59 169.691  11
  -3   9  -6 3433.27 177.289  10
   3   9   6 3514.31 188.771   4
   3   9   6 3744.25 183.067   8
  -3   9  -6 4271.18 171.081   7
  -3  -9  -6 3513.46 184.429   7
   3   9   6 3704.60 209.456   5
  -3   9  -6 4015.92 214.273   5
  -3  -9  -6 4015.57 188.927   5
  -3  -9  -7 962.232 44.7459   2
   3  -9   7 1067.59 100.644   3
  -3  -9  -7 1129.80 96.7557   3
   3  -9   7 1002.48 92.1082  11
  -3   9  -7 1008.17 99.6387  10
   3  -9   7 1074.57 60.5777   1
   3   9   7 995.538 72.5194   1
   3   9   7 1083.11 107.626   4
  -3   9  -7 976.280 86.3536   7
  -3  -9  -7 1138.97 107.125   7
  -3   9  -7 841.854 107.015   5
   3   9   7 918.533 114.139   5
  -3  -9  -7 1070.59 102.456   5
  -3  -9  -8 1567.21 62.0328   2
  -3  -9  -8 1759.87 120.440   3
   3  -9   8 1886.27 119.944  11
  -3   9  -8 1540.47 119.306  10
   3   9   8 1729.97 97.9035   1
   3  -9   8 1699.20 75.2022   1
   3  -9   8 1626.56 121.705   3
   3   9   8 1925.74 136.808   4
  -3   9  -8 1878.80 116.732   7
  -3  -9  -8 1723.33 131.719   7
  -3  -9  -8 1742.71 131.867   5
  -3   9  -8 1695.24 140.252   5
   3   9   8 1828.44 155.252   5
  -3  -9  -9 21331.2 441.156   2
  -3  -9  -9 23103.0 557.199   3
   3   9   9 22034.6 513.157   1
   3  -9   9 21891.4 458.378   1
   3  -9   9 22917.8 542.710  11
  -3   9  -9 21510.9 432.308   9
  -3   9  -9 20880.8 555.785  10
   3   9   9 23316.8 579.458   4
   3  -9   9 21306.8 555.128   3
  -3  -9  -9 22637.3 584.527   7
  -3   9  -9 22503.3 544.153   7
   3   9   9 22514.2 634.980   5
  -3   9  -9 21789.1 603.695   5
  -3  -9  -9 22132.1 587.174   5
   3  -9  10 5410.96 199.479   2
  -3  -9 -10 4661.74 128.848   2
  -3  -9 -10 4991.58 204.953   3
   3  -9  10 4831.01 139.430   1
   3   9  10 4924.43 182.428   1
   3  -9  10 4961.20 196.192  11
  -3   9 -10 4611.17 207.407  10
   3  -9  10 5226.39 214.411   3
   3   9  10 5240.66 221.480   4
   3  -9  10 5079.70 222.907   8
  -3   9 -10 5357.31 207.946   7
  -3  -9 -10 5035.78 225.460   7
  -3  -9 -10 5072.75 235.897   5
  -3   9 -10 5136.66 240.975   5
   3   9  10 5352.23 267.918   5
  -3  -9 -11 12172.0 278.851   2
   3  -9  11 12614.7 355.807   2
  -3  -9 -11 12785.7 369.235   3
   3  -9  11 11927.9 283.025   1
   3   9  11 11519.4 339.706   1
   3  -9  11 13080.5 361.182  11
  -3   9 -11 11531.7 369.238  10
   3   9  11 12931.7 384.896   4
   3  -9  11 12252.9 373.006   3
   3  -9  11 13301.0 399.750   8
  -3  -9 -11 12176.5 392.924   7
  -3   9 -11 13757.6 376.200   7
   3   9  11 13102.1 455.593   5
  -3   9 -11 12554.4 413.364   5
  -3  -9 -11 11718.6 404.428   5
   3  -9  12 12310.4 361.398   2
  -3  -9 -12 12821.5 375.195   3
  -3  -9 -12 12803.2 292.787   2
   3   9  12 12052.2 354.203   1
   3  -9  12 12658.4 292.935   1
   3  -9  12 13053.1 366.013  11
  -3   9 -12 12362.1 381.908  10
   3   9  12 13316.6 389.585   4
   3  -9  12 12685.9 380.749   3
   3   9  12 12590.6 454.670   5
   3  -9  12 13280.9 406.394   8
  -3  -9 -12 12528.8 404.202   7
  -3   9 -12 13692.6 388.635   7
  -3  -9 -12 12732.4 425.579   5
  -3   9 -12 12766.2 418.108   5
   3  -9  13 211.543 58.7808   3
  -3  -9 -13 252.282 62.3952   3
   3  -9  13 168.092 55.5904   2
   3   9  13 127.359 53.8166   1
   3  -9  13 201.707 61.9609  11
  -3   9 -13 72.6636 60.2923  10
   3   9  13 184.368 65.6797   4
   3   9  13 193.955 85.2468   5
   3  -9  13 198.539 76.4699   8
   3   9  13 171.301 72.3842   6
  -3   9 -13 173.512 64.4856   7
  -3  -9 -13 166.265 67.5104   7
  -3  -9 -13 147.300 76.6003   5
  -3   9 -13 165.666 71.6326   5
   3  -9  14 324.633 67.6225   3
  -3  -9 -14 286.640 59.6332   3
   3   9  14 327.234 66.0287   1
  -3  -9 -14 261.734 38.9619   2
   3  -9  14 290.324 63.6072   2
   3  -9  14 317.376 65.0910  11
  -3   9 -14 300.160 65.4439  10
   3   9  14 335.065 69.4895   4
   3   9  14 264.422 90.4300   5
   3  -9  14 366.494 81.9986   8
  -3   9 -14 366.854 74.9318   7
   3   9  14 361.359 82.5670   6
  -3   9 -14 350.720 85.3974   5
  -3  -9 -14 287.562 85.2892   5
   3  -9  15 1416.37 112.002   2
  -3  -9 -15 1450.38 77.6736   2
  -3  -9 -15 1619.41 114.654   3
   3   9  15 1300.98 106.502   1
   3  -9  15 1486.53 113.437  11
  -3   9 -15 1314.76 110.865  10
   3  -9  15 1416.38 110.809   3
   3   9  15 1204.61 107.119   4
   3   9  15 1466.10 159.275   5
   3  -9  15 1389.33 125.823   8
   3   9  15 1250.18 129.940   6
  -3   9 -15 1284.11 118.484   7
  -3  -9 -15 1251.30 139.262   5
  -3   9 -15 1509.63 137.215   5
  -3  -9 -16 3509.03 130.749   2
   3  -9  16 3495.36 175.225   2
  -3  -9 -16 3795.98 175.098   3
   3  -9  16 3566.47 123.656   1
   3  -9  16 3442.27 126.787   1
   3   9  16 3416.71 175.529   1
  -3   9 -16 3921.54 220.518  11
   3  -9  16 3506.45 174.618  11
  -3   9 -16 3289.26 173.873  10
   3  -9  16 3327.64 167.767   3
   3   9  16 3477.57 175.855   4
   3  -9  16 3539.28 193.341   8
  -3   9 -16 4351.98 207.805   7
   3   9  16 3465.87 209.968   6
  -3   9 -16 3539.98 203.768   5
  -3  -9 -16 3356.45 220.037   5
  -3  -9 -17 229.158 62.7280   3
   3   9  17 322.850 75.3376   1
   3  -9  17 208.260 69.1411  11
  -3   9 -17 318.315 76.5618  10
   3   9  17 334.324 75.6668   4
   3  -9  17 283.995 80.3351   8
  -3   9 -17 287.008 81.6677   7
  -3   9 -17 337.300 89.5767   5
   3   9  18 13650.3 418.645   1
  -3  -9 -18 13943.6 393.240   3
   3   9  18 14076.1 397.751   4
  -3  -9 -19 628.628 84.7791   3
  -3  -9 -20 4176.89 185.233   3
  -3 -11  11 6486.14 209.131  11
  -3  11  11 6896.55 258.604   4
  -3  11  10 118.408 65.8141   4
   3 -11 -10 190.339 70.1140   7
  -3 -11  10 220.611 47.2521  11
   3  11  -9 1706.04 123.782  10
   3 -11  -9 1535.74 124.112   7
  -3 -11   9 1934.14 102.257  11
   3 -11  -9 1830.15 112.563   2
  -3  11   9 1880.90 139.667   4
  -3  11   8 797.351 101.952   4
  -3 -11   8 807.771 69.2740  11
   3 -11  -8 855.190 96.9354   7
  -3 -11   8 630.870 82.4542   6
  -3 -11   8 704.780 58.4519   2
  -3 -11   7 6010.69 197.703  11
  -3 -11   7 5944.20 229.041   6
  -3 -11   7 6128.59 176.043   2
   3 -11  -6 3900.33 219.581  11
  -3 -11   6 3910.87 151.659  11
  -3 -11   6 3762.19 177.391   6
  -3 -11   6 3743.40 123.984   2
  -3  11   6 4146.49 216.948   8
   3 -11  -5 4908.40 240.830  11
  -3 -11   5 5128.93 181.389  11
  -3 -11   5 4972.57 209.283   6
  -3 -11   5 5006.12 143.143   2
  -3  11   5 5122.28 240.992   8
   3 -11  -4 2040.47 154.817  11
  -3 -11   4 2046.18 112.252  11
  -3  11   4 2013.92 147.970   8
  -3 -11   4 2133.43 134.073   6
  -3 -11   4 1925.31 75.6604   2
  -3  11   3 185.375 72.3626   8
   3 -11  -3 78.9045 63.4411  11
  -3 -11   3 69.6103 45.5563  11
  -3  11   3 139.803 87.3949   5
   3 -11  -3 37.2633 68.1829   6
  -3 -11   3 140.608 57.4850   6
  -3 -11   3 122.798 25.8066   2
  -3 -11   2 2512.28 77.0303   2
  -3 -11   2 3071.49 141.640  11
   3 -11  -2 2686.61 170.403  11
  -3 -11   2 2816.76 156.258   6
   3 -11  -2 2937.77 197.342   6
  -3  11   2 3071.15 220.594   5
  -3  11   2 2760.87 167.736   8
   3 -11  -1 271.881 73.1979  11
  -3 -11   1 283.266 55.7590  11
  -3  11   1 420.829 68.4065   7
   3  11  -1 389.192 85.5166   5
   3 -11  -1 396.420 96.1342   6
  -3  11   1 306.454 98.5403   5
  -3 -11   1 404.589 74.7855   6
  -3  11   1 274.533 73.6310   8
   3  11  -1 358.512 63.7369   8
   3 -11   0 60.9987 57.5764  11
  -3 -11   0 102.396 52.0245  11
  -3  11   0 56.1874 49.6479   7
   3  11   0 20.5948 65.4036   5
  -3  11   0 105.804 85.2938   5
   3 -11   0 141.895 75.0926   6
  -3 -11   0 86.1111 60.0240   6
   3  11   0 82.6095 50.4141   8
  -3  11   0 161.079 63.3012   8
  -3 -11  -1 3385.00 161.413  11
   3 -11   1 3111.97 177.182  11
  -3  11  -1 3439.35 165.318   7
   3 -11   1 3140.18 201.427   6
  -3 -11  -1 3435.73 182.584   6
   3  11   1 3267.59 204.482   5
  -3  11  -1 3004.83 219.452   5
  -3  11  -1 2999.40 170.166   8
   3  11   1 3321.21 162.690   8
  -3 -11  -2 7991.18 271.387  11
   3 -11   2 7751.89 290.130  11
  -3  11  -2 7983.10 266.300   7
  -3 -11  -2 8141.66 296.777   6
   3 -11   2 7403.20 317.635   6
  -3  11  -2 7734.23 352.519   5
   3  11   2 7486.95 323.531   5
   3  11   2 7763.98 271.556   8
  -3  11  -2 7544.99 282.535   8
   3 -11   3 2737.38 161.599  11
  -3 -11  -3 2464.15 149.711  11
   3  11   3 2680.15 153.937   8
   3 -11   3 2548.86 183.059   6
  -3  11  -3 2781.26 145.953   7
   3  11   3 2778.36 192.722   5
  -3  11  -3 2734.01 207.418   5
  -3 -11  -4 11749.9 362.786  11
   3 -11   4 11222.8 358.995  11
   3  11   4 11191.4 359.345   8
  -3  11  -4 11320.8 382.985  10
  -3  11  -4 12783.5 356.185   7
   3 -11   4 11127.0 402.907   6
  -3  11  -4 11884.8 445.132   5
   3  11   4 11597.6 419.802   5
   3 -11   5 3391.67 173.425  11
  -3 -11  -5 2966.92 172.823  11
   3  11   5 3417.33 183.024   8
  -3  11  -5 3152.38 185.404  10
  -3  11  -5 3636.14 168.436   7
   3 -11   5 3192.47 202.093   6
   3  11   5 3188.74 208.975   5
  -3  11  -5 3231.08 221.962   5
  -3 -11  -6 2605.17 160.682  11
   3 -11   6 2593.13 152.434  11
  -3  11  -6 2470.40 162.631  10
   3  11   6 2450.45 158.798   8
  -3  11  -6 2770.99 147.710   7
   3 -11   6 2557.72 179.466   6
   3  11   6 2723.01 198.800   5
  -3  11  -6 2637.25 198.759   5
  -3 -11  -7 363.469 79.3976  11
   3 -11   7 387.923 70.3698  11
  -3  11  -7 375.711 86.5784  10
   3  11   7 438.018 104.274   5
   3  11   7 461.173 84.3812   8
   3 -11   7 483.149 97.7468   6
  -3  11  -7 453.268 72.4594   7
  -3  11  -7 420.771 102.675   5
  -3 -11  -7 360.258 77.7924   5
   3 -11   8 2073.11 121.614   2
   3 -11   8 2154.68 137.394  11
  -3  11  -8 1984.98 149.197  10
   3  11   8 2229.74 156.858   8
   3 -11   8 2046.84 162.796   6
  -3  11  -8 2211.15 137.071   7
  -3  11  -8 2198.50 185.460   5
  -3 -11  -8 2194.94 152.919   5
   3  11   8 1988.24 179.321   5
   3 -11   9 124.113 50.2873   2
   3 -11   9 253.562 62.9208  11
  -3  11  -9 79.1885 68.3947  10
   3  11   9 119.450 88.5945   5
   3  11   9 111.946 74.4591   8
  -3  11  -9 155.500 63.0271   7
   3 -11   9 137.006 74.1420   6
  -3 -11  -9 165.210 72.7116   5
  -3  11 -10 9382.68 336.138  10
  -3 -11 -10 10321.6 358.539   5
   3 -11  10 9590.69 299.291   2
   3  11  10 9637.61 356.331   8
  -3  11 -11 1401.10 129.548  10
   3 -11  11 1697.49 117.926   2
  -3  11 -12 1793.50 142.214  10
   3 -11  12 1502.32 115.549   2
  -4   0  30 2175.12 121.650   9
   4   0 -30 2135.05 131.388   3
  -4   0  29 95.7281 60.0087   9
   4   0 -29 57.3044 56.4273   3
  -4   0  28 33668.1 699.748  10
  -4   0  28 31484.4 715.925   9
  -4   0  27 129.130 58.7265  10
  -4   0  27 110.854 57.9365   9
   4   0 -27 186.823 106.116   5
  -4   0  27 95.5864 87.2029   6
  -4   0  27 182.975 82.8521   1
  -4   0  26 8501.21 309.458   1
   4   0 -26 9154.72 320.157  11
  -4   0  26 8821.64 246.721  10
  -4   0  26 8301.32 256.441   9
  -4   0  26 8753.78 334.730   6
   4   0 -26 8564.45 375.189   5
   4   0 -25 17.0116 55.2607  11
  -4   0  25-8.48477 34.9935  10
   4   0 -25 108.343 42.9811   4
  -4   0  25 56.4188 39.5122   9
   4   0 -25-55.3165 57.0347   2
  -4   0  25-43.1284 59.5219   1
   4   0 -25 17.2968 65.9298   5
  -4   0  25-25.3980 63.6974   6
   4   0 -24 1136.00 105.913   2
   4   0 -24 1036.20 105.828  11
  -4   0  24 1129.32 77.9316  10
  -4   0  24 1168.79 105.168   1
  -4   0  24 1100.91 81.6214   9
  -4   0  24 1084.31 111.989   6
   4   0 -24 983.560 131.669   5
  -4   0  23 2.77322 37.6459  10
  -4   0  23 31.7375 37.7862   9
   4   0 -23-26.8155 60.5750  11
  -4   0  23 46.7893 53.0307   6
   4   0 -23 55.4099 61.7987   5
  -4   0  23 30.2627 47.6634   1
   4   0 -23-10.3226 44.7360   2
   4   0 -22 33363.0 755.854   2
  -4   0  22 32278.6 748.022   1
   4   0 -22 32431.0 759.841  11
  -4   0  22 30451.0 686.212   9
  -4   0  22 31419.5 767.690   6
   4   0 -22 31852.7 828.098   5
  -4   0  21 85.3060 46.1858   9
   4   0 -21 114.795 61.1932  11
  -4   0  21 37.3206 52.3594   6
   4   0 -21 50.2786 65.6978   5
  -4   0  21 160.886 59.7146   1
   4   0 -21 18.7518 48.9934   2
   4   0 -20 5290.64 212.274   2
   4   0 -20 4980.69 215.014  11
  -4   0  20 4819.64 203.053   1
  -4   0  20 4744.32 173.811   9
  -4   0  20 4865.44 214.626   6
   4   0 -20 4834.15 246.134   5
  -4   0  19 5.13238 33.4696  10
  -4   0  19-4.19163 45.4658   1
   4   0 -19 33.9178 45.7095   2
  -4   0  19 5.78502 37.4096   9
   4   0 -19 60.4059 49.7897  11
  -4   0  19 33.6467 50.8649   6
   4   0 -19 12.8558 57.7782   5
   4   0 -18 120.636 47.9597  11
  -4   0  18 165.109 39.8383  10
  -4   0  18 40.9357 44.7454   6
   4   0 -18 394.035 79.7685   5
  -4   0  18 111.563 40.0863   9
  -4   0  18 103.614 48.9312   1
   4   0 -18 487.801 61.7184   2
  -4   0  17 19.4128 26.1622  10
  -4   0  17 12.8599 39.5323   6
   4   0 -17-5.69086 42.3126   5
  -4   0  17 13.4262 26.9389   9
  -4   0  17 3.55815 26.7931   2
   4   0 -17 26.7508 30.8591   2
  -4   0  17 11.3294 36.5275   1
  -4   0  16 2733.18 132.578   1
  -4   0  16 2858.97 113.510  10
   4   0 -16 2869.03 161.855   5
  -4   0  16 2657.59 114.117   9
  -4   0  16 2697.30 138.474   6
  -4   0  16 2515.18 126.762   2
   4   0 -16 2723.17 134.407   2
  -4   0  15-4.54280 21.4650  10
  -4   0  15 18.8179 27.2561   6
   4   0 -15-4.95209 28.8838   5
  -4   0  15 49.3037 23.6630   9
  -4   0  15 15.8219 24.4162   2
   4   0 -15-13.6149 25.9482   2
  -4   0  15 13.4256 27.6856   1
   4   0 -14 51206.8 1058.61   1
  -4   0  14 52466.3 1056.38   1
  -4   0  14 52809.3 1017.06  10
   4   0 -14 50499.2 1102.89   5
  -4   0  14 51960.3 1022.51   9
  -4   0  14 51310.3 1063.18   6
   4   0 -14 50950.9 1053.62   2
  -4   0  13 8.20688 22.1262  10
  -4   0  13 71.3215 26.2741   9
  -4   0  13 16.1960 27.5460   6
   4   0 -13 25.3141 37.2556   5
  -4   0  13 53.4100 28.9212   1
   4   0 -13 15.6922 26.4267   1
  -4   0  12 853.058 76.0544   5
   4   0 -12 919.853 81.6320   5
  -4   0  12 868.249 59.4308   9
  -4   0  12 963.808 72.5448   6
   4   0 -12 803.956 65.4324   1
  -4   0  12 695.526 61.5741   1
  -4   0  11 29.7335 23.6110   9
   4   0 -11 52.6325 30.1332   5
  -4   0  11 5.45709 25.3822   6
   4   0 -11 57.3424 28.3504   1
  -4   0  11 94.1680 36.4858   5
   4   0 -10 26438.5 606.903   5
  -4   0  10 27190.1 584.628   6
   4   0 -10 27274.6 584.826   1
  -4   0  10 27995.0 611.224   5
   4   0  -9 50.7290 24.4299   5
  -4   0   9 2.22656 16.5586   6
   4   0  -9 32.9973 19.7765   2
   4   0  -9 11.4985 18.1650   1
  -4   0   9 25.5933 23.2134   5
   4   0  -8 1218.67 72.0674   5
  -4   0   8 1324.17 77.1780   5
  -4   0   8 1264.15 67.1600   6
   4   0  -8 1167.96 65.6444   2
   4   0  -7 8.83666 9.36148   4
   4   0  -7 45.2032 20.5066   5
  -4   0   7 12.2189 14.5541   6
   4   0  -7 27.6025 14.5391   2
   4   0  -7 22.6814 16.6946   1
   4   0  -6 1768.75 74.9075   1
   4   0  -6 1608.32 57.0675   4
  -4   0   6 1959.71 83.2260   5
   4   0  -6 1779.41 77.8762   5
   4   0  -6 1753.12 73.9981   9
   4   0  -6 1814.60 76.0481   6
  -4   0   6 1803.67 73.3262   6
   4   0  -6 1800.88 75.0546   2
   4   0  -5 23.6296 15.7397   6
  -4   0   5 17.0512 17.7093   5
   4   0  -5 27.8678 16.8050   5
   4   0  -5 21.4296 12.3056   4
  -4   0   5 24.8069 15.5576   6
   4   0  -5 51.0451 17.8858   1
   4   0  -4 250753. 4565.32   5
  -4   0   4 259597. 4542.28  10
  -4   0   4 251399. 4556.93   9
   4   0  -4 246162. 4547.33   4
  -4   0   4 243787. 4550.53   4
   4   0  -4 252586. 4564.71   6
   4   0  -4 252766. 4568.38   1
   4   0  -3 53.8482 13.3518   5
   4   0  -3 16.0189 11.2936   4
  -4   0   3 7.20635 10.4207   9
   4   0  -3 60.7797 16.0716   6
   4   0  -3 100.152 16.2664   1
   4   0  -2 210806. 3876.56  10
   4   0  -2 211260. 3879.71   4
  -4   0   2 213521. 3879.05   9
   4   0  -2 217600. 3884.26   1
   4   0  -2 215444. 3875.12   5
  -4   0   1 1.94457 10.1038   9
   4   0  -1 16.1061 10.1046   8
   4   0  -1 15.2518 12.8875   4
   4   0  -1 22.7970 15.7841  10
   4   0  -1 12.1663 8.79326  11
  -4   0   0 27578.8 525.235   9
   4   0   0 28258.7 536.299  10
   4   0   0 26930.9 539.984   4
   4   0   0 27384.4 519.983   8
   4   0   0 26627.8 508.322   7
   4   0   0 26298.0 519.045  11
   4   0   1 51.8166 15.8835  10
   4   0   1 8.70844 7.34166   7
   4   0   1 34.2400 10.7442  11
  -4   0  -1 24.8594 14.2559   4
  -4   0  -2 675403. 12644.4  10
   4   0   2 692662. 12617.7  11
  -4   0  -3 90.9357 25.4460  10
   4   0   3 43.6483 16.2697  11
  -4   0  -3 91.0032 23.2318   4
  -4   0  -4 956040. 17710.0  10
   4   0   4 983165. 17675.0  11
  -4   0  -4 999999. 17701.3   4
  -4   0  -5 55.5310 25.8774  10
   4   0   5 26.1354 14.9941  11
  -4   0  -6 287024. 5284.55  10
   4   0   6 288584. 5248.55  11
  -4   0  -7-5.94506 22.1025  10
   4   0   7 6.84207 12.7205   2
   4   0   8 26709.6 555.344   2
  -4   0  -8 27303.0 605.501  10
   4   0   8 26787.8 574.546  11
  -4   0  -9 21.5851 27.7644  10
   4   0   9 36.7978 17.0486   2
   4   0   9 40.4849 24.6899  11
   4   0  10 54473.9 1057.65   2
  -4   0 -10 53498.9 983.176   3
  -4   0 -10 55181.5 1119.54  10
  -4   0 -11 26.0257 8.25953   3
  -4   0 -11 12.4518 32.4078  10
   4   0  11 46.5718 22.4209   2
   4   0  12 88082.7 1677.05   2
  -4   0 -12 86969.4 1594.25   3
  -4   0 -12 88945.5 1750.07  10
   4   0  13 18.5381 31.6454  10
  -4   0 -13-14.3775 43.0791  10
  -4   0 -13 28.7068 24.1697  11
  -4   0 -13 5.47811 33.2580   5
  -4   0 -13 27.2232 10.0983   3
   4   0  13 5.67156 21.3558   2
  -4   0 -14 3528.39 189.736   5
  -4   0 -14 3936.58 149.108  11
  -4   0 -14 3160.27 169.945  10
  -4   0 -14 3370.58 90.0187   3
   4   0  14 3720.99 146.225   2
   4   0  14 3364.41 143.882  10
   4   0  15 6.71503 32.2286  10
  -4   0 -15 3.27001 28.0752  11
  -4   0 -15 12.8131 46.3963   5
  -4   0 -15 13.4736 11.6690   3
   4   0  15 38.9893 26.2372   2
  -4   0 -16 23186.8 657.054   5
  -4   0 -16 26154.3 574.149  11
  -4   0 -16 24180.0 478.893   3
   4   0  16 24042.2 566.015   2
   4   0  16 25283.5 571.193  10
   4   0  17 3.60479 35.3914  10
  -4   0 -17 51.1527 35.8722  11
  -4   0 -17 49.4134 40.7238   4
  -4   0 -17 7.23645 53.8041   5
  -4   0 -17 12.8535 14.2027   3
   4   0  17-14.6883 34.7012   2
  -4   0 -18 8619.35 283.459   4
  -4   0 -18 8129.17 344.365   5
  -4   0 -18 8616.23 270.156  11
  -4   0 -18 8298.01 192.514   3
   4   0  18 8322.88 268.599   2
   4   0  18 8506.17 266.609  10
   4   0  19 22.9798 43.7377  10
  -4   0 -19 40.4418 40.8570  11
  -4   0 -19 54.1191 44.2784   4
  -4   0 -19 8.21045 58.6516   5
  -4   0 -19 13.4382 18.4587   3
   4   0  19 16.3425 34.7394   2
   4   0  20 20650.0 506.720  10
  -4   0 -20 21833.2 522.013  11
  -4   0 -20 19654.0 525.068   4
  -4   0 -20 20125.4 631.055   5
   4   0  20 20621.8 518.232   2
  -4   0 -20 20455.9 416.954   3
   4   0  20 19321.0 532.744   1
   4   0  21-8.08914 45.1729  10
  -4   0 -21-13.2612 43.0789  11
  -4   0 -21-27.4666 62.6181   5
  -4   0 -21 93.2027 52.5628   4
  -4   0 -21 14.6774 19.0658   3
   4   0  21 53.0599 48.1109   1
   4   0  21 58.5238 42.5427   2
   4   0  22 10654.3 351.804   1
   4   0  22 10396.5 315.310  10
  -4   0 -22 10847.6 330.062  11
  -4   0 -22 9839.16 331.078   4
   4   0  22 10341.1 328.689   2
  -4   0 -22 10011.5 233.720   3
  -4   0 -22 9752.96 417.967   5
   4   0  23 4.23299 45.0770  10
  -4   0 -23-19.1322 48.3207  11
  -4   0 -23 31.5516 49.2977   4
  -4   0 -23-29.9908 80.7237   5
  -4   0 -23 25.6823 20.5276   3
   4   0  23 14.7782 40.2081   2
   4   0  23 52.5359 45.5733   1
   4   0  24 2789.71 172.374   1
   4   0  24 2954.52 151.530  10
  -4   0 -24 2781.22 155.970  11
  -4   0 -24 2629.57 160.513   4
  -4   0 -24 2628.36 218.949   5
   4   0  24 2678.45 155.386   2
  -4   0 -24 2690.96 91.4539   3
   4   0  25-26.5960 53.8216  10
  -4   0 -25 35.5759 24.3816   3
   4   0  25 47.9239 44.3805   2
   4   0  25 44.1819 59.1716   1
  -4   0 -25 5.64854 59.7750   4
  -4   0 -25 107.571 91.4617   5
  -4   0 -26 22171.1 585.005   4
  -4   0 -26 21309.6 443.417   3
   4   0  26 23053.2 556.947  10
  -4   0 -27 35.4126 70.2691   4
   4   0  27 9.16376 55.0941  10
   4   0  28 6344.92 211.937   9
   4   0  28 6196.91 238.204  10
   4   0  29-6.46526 46.5035   9
  -4  -2  30 3588.77 147.589   9
  -4  -2  29 2129.67 114.125   9
   4   2 -29 2115.45 140.217   3
  -4   2  29 2406.18 146.540  10
   4   2 -28 965.855 142.874   5
  -4   2  28 1245.32 112.327  10
   4   2 -28 1255.42 108.608   3
  -4  -2  28 1126.28 85.9172   9
  -4   2  28 1029.06 101.766   9
  -4  -2  28 1221.07 131.604   6
  -4  -2  28 993.785 110.599   1
  -4  -2  27 225.027 73.5813   1
   4   2 -27 291.581 77.0475  11
  -4  -2  27 209.243 40.1163  10
  -4   2  27 349.633 78.1547  10
  -4  -2  27 228.028 57.7499   9
  -4   2  27 232.613 66.9385   9
   4   2 -27 132.651 94.8548   5
  -4  -2  27 265.751 86.0392   6
   4   2 -27 271.256 67.0463   3
  -4   2  26 7380.99 291.299   1
  -4  -2  26 7079.42 272.173   1
   4   2 -26 7290.84 270.163  11
  -4   2  26 7671.93 269.756  10
  -4  -2  26 7115.60 184.799  10
   4   2 -26 7733.18 258.626   3
  -4  -2  26 6845.52 215.611   9
  -4   2  26 7133.31 253.502   9
  -4  -2  26 7171.38 295.370   6
  -4   2  26 7048.58 307.711   6
   4   2 -26 6926.47 329.887   5
   4  -2 -26 7166.46 346.694   5
  -4  -2  25 388.975 71.4796   1
  -4   2  25 308.796 74.7377   1
   4  -2 -25 356.649 71.6214   2
   4   2 -25 246.959 71.8238   2
  -4   2  25 253.287 67.6504  10
  -4  -2  25 274.442 37.5839  10
   4   2 -25 222.750 65.1515  11
   4  -2 -25 294.834 81.3680  11
  -4  -2  25 325.238 50.1210   9
  -4   2  25 177.306 59.7183   9
   4   2 -25 296.843 59.5077   3
  -4   2  25 213.374 72.5363   6
  -4  -2  25 198.612 72.8834   6
   4   2 -25 171.895 85.0963   5
   4  -2 -25 272.686 95.6975   5
   4   2 -24 181.306 58.6944   2
  -4   2  24 270.931 64.9803   1
   4  -2 -24 250.756 61.7384   2
  -4  -2  24 253.360 61.1884   1
  -4   2  24 258.189 60.8675  10
  -4  -2  24 243.788 32.6633  10
   4   2 -24 305.366 63.6759  11
  -4  -2  24 299.530 44.8428   9
  -4   2  24 98.2519 54.8836   9
   4   2 -24 218.865 51.6488   3
  -4   2  24 318.581 73.8328   6
   4   2 -24 224.636 79.9855   5
   4  -2 -24 341.429 89.7671   5
   4  -2 -23 36.0176 49.4248   2
  -4  -2  23 113.607 50.4988   1
   4   2 -23 56.1193 46.6934   2
  -4  -2  23 103.351 26.1029  10
  -4   2  23 161.534 53.9916  10
   4   2 -23 128.374 48.9108  11
  -4  -2  23 159.297 36.5003   9
  -4   2  23 89.3216 45.3844   9
  -4  -2  23 135.199 54.8717   2
   4   2 -23 65.6012 42.8942   3
   4   2 -23 147.096 62.5615   5
   4  -2 -23 126.250 72.9755   5
  -4   2  23 108.799 52.2710   6
  -4  -2  22 4.35601 35.5588   1
   4  -2 -22 14.8574 48.9810   2
   4   2 -22 63.0594 42.8331   2
   4   2 -22 101.500 47.5044  11
  -4  -2  22 24.8331 24.0423  10
  -4   2  22-28.2262 56.5688  10
  -4   2  22 55.8591 40.5904   9
  -4  -2  22 32.4258 32.6708   9
   4   2 -22 69.9400 57.0886   5
   4  -2 -22 40.3293 66.5334   5
  -4   2  22 12.3174 49.7336   6
  -4  -2  22 9.20150 43.4800   2
   4   2 -22 67.0773 41.8593   3
   4   2 -21 2656.80 146.105   2
  -4  -2  21 2238.83 135.110   2
   4  -2 -21 2398.74 144.504   2
  -4  -2  21 2230.72 131.670   1
   4   2 -21 2222.16 129.070  11
  -4   2  21 2579.10 150.607  10
  -4  -2  21 2323.31 84.2415  10
  -4   2  21 2818.51 185.117   5
   4   2 -21 2426.10 127.548   3
  -4  -2  21 2268.97 106.132   9
  -4   2  21 2383.74 162.080   6
   4  -2 -21 2438.87 185.732   5
   4   2 -21 2484.39 168.209   5
   4   2 -20 59317.0 1217.29   2
   4  -2 -20 59914.9 1223.53   2
  -4  -2  20 54199.9 1194.05   2
  -4  -2  20 59771.3 1201.68   1
  -4   2  20 60301.4 1226.66  10
   4   2 -20 56324.6 1186.72  11
  -4  -2  20 57859.0 1095.59  10
  -4   2  20 58784.6 1302.07   5
   4   2 -20 61111.1 1186.45   3
  -4  -2  20 55871.5 1133.95   9
  -4   2  20 58153.9 1257.57   6
   4   2 -20 59127.1 1283.47   5
   4  -2 -20 57751.5 1315.07   5
   4  -2 -19 139.696 58.8585   2
   4   2 -19 389.329 66.7323   2
  -4  -2  19 160.657 52.5067   1
   4   2 -19 146.491 49.8565  11
  -4  -2  19 117.740 27.5779  10
  -4   2  19 113.255 58.6447  10
   4   2 -19 130.637 64.0700   5
  -4   2  19 125.638 74.3150   5
  -4  -2  19 117.020 41.7585   9
   4  -2 -19 119.104 70.8247   5
  -4   2  19 97.4678 61.8888   6
   4   2 -19 159.600 44.6858   3
  -4  -2  19 174.050 51.6543   2
   4   2 -18 60277.7 1198.62   2
  -4  -2  18 54427.3 1176.34   2
  -4  -2  18 59145.7 1181.56   1
   4   2 -18 58225.9 1172.08  11
  -4  -2  18 57246.8 1083.73  10
   4   2 -18 58547.8 1169.55   3
  -4   2  18 60433.2 1284.19   5
  -4  -2  18 57129.6 1125.09   9
  -4   2  18 59236.7 1239.75   6
   4  -2 -18 57552.7 1285.92   5
   4   2 -18 57092.0 1248.40   5
  -4  -2  17 6.64581 36.9022   1
   4   2 -17 3.77678 33.3489   2
   4   2 -17 3.21458 31.3288  11
  -4  -2  17 11.9791 15.0847  10
  -4   2  17 67.2765 49.9211   5
   4   2 -17-5.17771 41.8105   5
  -4  -2  17 43.6016 25.0900   9
  -4   2  17 34.3695 40.5011   6
   4  -2 -17 50.2983 48.5124   5
  -4  -2  17 56.6832 37.0130   2
   4   2 -16 1241.78 88.3157   2
  -4  -2  16 1131.09 82.0772   2
   4  -2 -16 1156.53 95.8279   1
  -4  -2  16 1328.75 86.2035   1
   4   2 -16 1051.07 76.3921  11
  -4  -2  16 1240.89 47.0390  10
  -4   2  16 1115.13 107.439   5
  -4  -2  16 1289.87 68.1950   9
  -4   2  16 1203.98 100.051   6
   4  -2 -16 1137.85 109.507   5
   4   2 -16 1258.46 106.439   5
   4   2 -15 560.629 59.2826   2
  -4  -2  15 655.758 61.5531   2
  -4  -2  15 545.173 54.4574   1
   4  -2 -15 546.626 64.4308   1
  -4   2  15 510.504 60.2324   1
   4   2 -15 608.260 56.4241  11
  -4  -2  15 591.258 29.5438  10
  -4   2  15 583.131 78.2782   5
  -4  -2  15 533.580 44.9793   9
  -4   2  15 578.878 70.7387   6
   4   2 -15 548.941 69.4789   5
   4  -2 -15 520.520 74.6091   5
   4   2 -14 22342.1 503.309  11
  -4  -2  14 22328.1 431.258  10
  -4   2  14 22460.2 535.335   1
  -4  -2  14 23980.1 511.947   1
   4  -2 -14 23419.5 551.257   1
  -4  -2  14 22301.1 475.794   9
  -4  -2  14 22529.0 513.740   2
   4   2 -14 23712.1 525.413   2
   4  -2 -14 21979.3 585.606   5
  -4   2  14 22781.7 592.836   5
   4   2 -14 22073.3 550.093   5
   4   2 -13 9545.78 256.757  11
  -4  -2  13 9668.54 193.352  10
  -4  -2  13 9734.28 237.911   9
   4   2 -13 9837.66 293.447   5
   4  -2 -13 9640.41 323.546   5
   4   2 -13 9419.75 269.491   2
  -4  -2  13 9856.92 266.859   2
  -4  -2  13 9488.92 257.959   1
   4  -2 -13 10315.7 296.619   1
  -4   2  13 9926.50 285.517   1
  -4   2  12 186391. 3439.40   1
  -4  -2  12 188078. 3401.63   1
   4   2 -12 178654. 3393.93  11
  -4  -2  12 185819. 3378.16   9
   4   2 -12 181517. 3416.51   2
  -4  -2  12 183927. 3411.93   2
   4   2 -12 187106. 3445.41   5
   4  -2 -12 180992. 3494.91   5
  -4  -2  11 2157.04 92.1858   1
  -4   2  11 2359.72 112.336   1
   4   2 -11 2048.53 88.5282  11
  -4  -2  11 2175.02 84.4449   9
   4   2 -11 2154.24 94.4591   9
   4   2 -11 2185.02 100.084   2
  -4  -2  11 2020.32 95.2230   2
   4   2 -11 2044.25 106.908   5
   4  -2 -11 2282.76 131.121   5
   4   2 -10 60665.2 1145.30   1
  -4   2  10 61308.2 1178.98   1
  -4  -2  10 59669.3 1140.46   1
   4   2 -10 57079.9 1132.11  11
   4   2 -10 59008.7 1141.66   9
  -4  -2  10 59583.3 1129.26   9
   4  -2 -10 58223.5 1214.76   5
   4   2 -10 58350.9 1169.66   5
  -4  -2  10 58434.2 1150.31   2
   4   2 -10 61002.7 1158.57   2
  -4  -2   9 49504.8 993.247   2
   4   2  -9 51168.6 1001.49   2
   4   2  -9 47785.6 975.230  11
  -4   2   9 52784.8 1022.49   1
  -4  -2   9 52602.5 985.300   1
   4   2  -9 52734.5 990.775   1
  -4  -2   9 51963.3 983.305   9
   4   2  -9 51628.1 988.215   9
   4  -2  -9 52552.0 1056.48   6
   4   2  -9 49987.7 1006.53   5
   4  -2  -9 51116.5 1056.40   5
   4   2  -8 1468.60 70.1880   2
  -4  -2   8 1399.26 67.6717   2
   4   2  -8 1339.01 57.1788  11
  -4  -2   8 1578.09 66.7269   9
  -4  -2   8 1450.87 62.7228   1
   4   2  -8 1439.24 64.5489   1
  -4   2   8 1372.96 76.2742   1
   4   2  -8 1462.35 66.4332   9
   4  -2  -8 1458.45 90.2911   6
   4  -2  -8 1466.25 91.7616   5
   4   2  -8 1393.44 69.3400   5
   4   2  -7 3217.02 107.349   2
  -4  -2   7 3280.76 106.159   2
   4   2  -7 3045.87 89.1205  11
  -4  -2   7 3228.06 105.063   9
  -4   2   7 3139.06 118.441   1
  -4  -2   7 3480.96 98.1616   1
   4   2  -7 3391.12 102.421   1
   4   2  -7 3109.70 103.817   9
   4  -2  -7 3317.34 136.083   6
   4  -2  -7 3053.58 132.509   5
   4   2  -7 3447.33 106.146   5
  -4  -2   6 123516. 2253.38   2
   4   2  -6 123008. 2254.72   2
   4   2  -6 120033. 2226.83  11
  -4  -2   6 115661. 2255.58   9
  -4  -2   6 124859. 2237.42   1
  -4   2   6 123413. 2276.66   1
   4   2  -6 121543. 2243.87   1
   4   2  -6 124987. 2256.21   9
   4  -2  -6 126121. 2310.52   6
   4   2  -6 122748. 2243.87   5
   4  -2  -6 122154. 2309.94   5
   4   2  -5 14987.8 310.775   2
  -4  -2   5 14640.7 309.592   2
   4   2  -5 14514.3 284.983  11
   4   2  -5 14798.6 285.586  10
   4  -2  -5 14592.5 354.487   5
   4   2  -5 14411.3 293.465   5
   4   2  -5 15221.5 316.960   9
   4  -2  -5 15336.2 357.358   6
  -4   2   5 14294.0 328.574   1
   4   2  -5 14588.2 302.359   1
  -4  -2   5 14808.7 296.486   1
  -4   2   4 87549.5 1622.38   1
   4   2  -4 86093.0 1589.59   1
  -4  -2   4 85719.1 1585.84   1
   4  -2  -4 86384.8 1651.86   5
   4   2  -4 87476.8 1590.39  10
   4   2  -4 87988.9 1610.34   9
   4  -2  -4 87014.9 1653.11   6
   4   2  -4 85990.5 1597.74   2
   4   2  -3 12542.4 257.687   1
  -4   2   3 13159.9 287.787   1
   4   2  -3 13243.7 272.283  10
   4   2  -3 13146.2 279.837   9
   4   2  -3 13304.7 285.127   3
   4  -2  -3 12794.3 306.278   5
   4   2  -3 12946.9 261.994   2
   4   2  -2 9769.97 198.733   2
   4   2  -2 9531.10 200.037   1
  -4   2   2 9888.38 226.491   1
   4   2  -2 10027.6 224.365  10
   4   2  -2 9990.03 243.060   4
   4   2  -2 9818.43 223.993   3
  -4   2   2 9477.82 237.239   8
   4  -2  -2 9758.45 198.247   7
   4   2  -2 9821.06 233.835   7
   4  -2  -2 9366.84 240.448   5
   4  -2  -1 23.6103 16.2404  11
   4   2  -1 35.9807 15.9247  10
  -4   2   1 15.7270 13.8135   8
  -4   2   1 35.7856 12.4334   9
   4   2  -1 9.26329 11.7852   7
   4  -2  -1 40.2111 6.88626   7
   4   2  -1 38.2915 6.54232   2
   4   2  -1 41.6804 12.2315   3
  -4  -2   0 11641.7 228.179  11
   4   2   0 11566.0 274.069  10
   4  -2   0 11390.2 275.343  11
  -4   2   0 11436.4 270.750  10
   4   2   0 11104.5 251.251   3
  -4   2   0 11884.5 246.481   9
  -4   2   0 11879.1 272.721   8
   4   2   0 11607.3 264.924   7
  -4   2   0 11636.2 223.116   7
   4   2   0 11940.2 239.409   6
  -4  -2   0 11707.6 243.244   5
   4   2   1 5339.82 134.314   3
   4  -2   1 5236.95 152.022  11
   4   2   1 5653.41 162.711  10
  -4   2  -1 5497.75 153.539  10
  -4  -2  -1 5376.58 158.833   4
  -4  -2  -1 5083.83 127.341   3
  -4   2  -1 5397.14 150.497   8
  -4   2  -1 5466.15 124.228   9
   4   2   1 5427.77 148.075   7
  -4   2  -1 5149.95 110.756   7
  -4  -2  -1 5227.32 137.535   5
   4   2   2 20208.9 407.973   3
   4   2   2 19571.7 382.702   2
   4  -2   2 20132.6 432.975  11
   4   2   2 20292.9 449.444  10
  -4   2  -2 21005.4 438.909  10
  -4  -2  -2 20929.3 445.072   4
  -4  -2  -2 20759.8 402.840   3
  -4   2  -2 21508.1 434.168   8
  -4   2  -2 21014.4 392.532   9
   4   2   2 20334.2 429.135   7
  -4  -2  -2 20548.0 429.499   5
   4  -2   3 59.2863 17.7598  11
  -4   2  -3 50.5829 21.1207  10
   4   2   3 51.3365 24.8828  10
  -4  -2  -3 25.0902 17.7994   4
  -4  -2  -3 66.9782 21.0847   5
  -4   2  -3 41.7997 8.84167   9
   4   2   3 49.3694 18.3752   7
  -4  -2  -3 41.7419 10.7467   3
   4   2   3 39.1346 12.0985   3
   4   2   3 64.4111 9.95570   2
   4  -2   3 72.8554 15.6926   3
   4   2   4 46721.4 874.105   3
   4  -2   4 46246.5 888.185   3
   4   2   4 45405.0 867.484   2
   4  -2   4 46590.1 906.982  11
   4   2   4 47068.2 942.381  10
  -4   2  -4 46707.3 920.494  10
  -4  -2  -4 48067.3 924.323   4
  -4  -2  -4 46478.9 870.447   3
   4   2   4 46866.6 910.480   7
  -4  -2  -4 48984.1 937.146   5
   4  -2   5 50.8075 17.3129  11
  -4   2  -5 40.1379 18.8002  10
  -4  -2  -5 84.4101 29.6027   5
  -4  -2  -5 56.0685 21.3854   4
   4  -2   5 61.5259 7.87184   9
  -4  -2  -5 49.9645 10.6898   3
   4  -2   5 59.1410 14.8791   3
   4   2   5 58.8723 12.0945   2
  -4   2  -6 40116.8 823.558  10
   4  -2   6 41321.6 808.001  11
  -4  -2  -6 41365.4 810.477  11
  -4  -2  -6 40108.2 825.113   4
  -4  -2  -6 41315.7 764.045   3
   4  -2   6 41368.0 784.698   3
   4   2   6 39833.2 779.361   2
  -4  -2  -6 39803.6 853.155   5
  -4   2  -7 2535.88 111.435  10
   4  -2   7 2496.21 100.152  11
  -4  -2  -7 2693.19 104.387  11
   4   2   7 2526.60 108.670   4
  -4  -2  -7 2691.08 111.186   4
   4  -2   7 2715.13 85.6201   3
  -4  -2  -7 2664.32 72.0784   3
   4   2   7 2489.95 86.3278   2
  -4  -2  -7 2500.89 127.106   5
   4   2   8 2699.29 114.980   4
  -4  -2  -8 2548.44 110.930   4
   4  -2   8 2562.76 84.3376   3
   4  -2   8 2802.58 60.9943   9
   4  -2   8 2781.78 113.851  10
  -4   2  -8 2497.09 116.227  10
  -4   2  -8 2703.41 87.4777   3
   4   2   8 2648.16 93.6134   2
  -4  -2  -8 2551.21 72.7739   3
   4  -2   8 2778.76 108.259  11
  -4  -2  -8 2607.09 108.909  11
   4  -2   9 35.7301 21.6106  11
  -4  -2  -9 111.768 29.3908   4
   4  -2   9 41.1924 23.9510  10
  -4   2  -9 69.3637 28.5085  10
   4  -2   9 33.9533 13.3310   3
  -4  -2  -9 33.7936 9.87645   3
  -4   2  -9 45.0590 16.3380   3
   4   2   9 42.8390 18.0475   2
  -4   2 -10 74458.5 1372.14   3
   4   2  10 74042.1 1396.88   2
   4  -2  10 74245.4 1426.60   2
  -4  -2 -10 72564.5 1347.21   3
   4  -2  10 71746.7 1363.94   3
  -4  -2 -10 74641.2 1431.46   4
  -4   2 -10 73365.8 1448.41  10
  -4  -2 -11 1617.60 95.6238   4
  -4   2 -11 2041.13 113.454  10
  -4  -2 -11 1918.82 59.7732   3
   4   2  11 1918.54 88.9485   2
  -4   2 -11 1967.79 74.6707   3
   4  -2  11 1905.69 97.8920   2
  -4   2 -11 1938.80 97.3858  11
  -4  -2 -11 1697.26 96.4745  11
  -4  -2 -12 68344.1 1417.85   4
  -4   2 -12 70990.1 1447.95  10
   4  -2  12 72781.3 1422.00   2
   4   2  12 73391.1 1398.85   2
  -4   2 -12 73927.0 1362.89   3
  -4   2 -12 72811.1 1415.56  11
  -4  -2 -13 48.2050 32.2589   4
   4   2  13 29.3344 39.6168  10
  -4   2 -13 32.8494 36.6008  10
  -4   2 -13 45.4804 19.7041   3
   4  -2  13 76.5937 28.7084   2
   4   2  13 54.9523 25.9034   2
  -4  -2 -14 62837.7 1332.27   4
  -4   2 -14 64864.0 1369.11  10
   4   2  14 67989.6 1374.35  10
   4  -2  14 69102.9 1327.66  10
   4   2  14 65710.4 1315.75   2
   4  -2  14 65348.5 1336.98   2
  -4   2 -14 69114.8 1272.68   3
  -4   2 -14 68923.7 1332.73  11
  -4  -2 -15 1214.67 89.2839   4
  -4   2 -15 1127.45 97.1731  10
   4  -2  15 1174.58 83.6205  10
   4   2  15 1275.04 101.951  10
   4  -2  15 1280.46 90.7417   2
  -4   2 -15 1301.75 64.8237   3
   4   2  15 1178.53 79.6250   2
  -4   2 -15 1120.05 84.9630  11
  -4   2 -16 20385.7 480.723  11
  -4  -2 -16 17666.9 470.450   4
  -4   2 -16 18694.0 513.143  10
   4   2  16 19460.4 507.535  10
   4  -2  16 20608.1 472.519  10
   4   2  16 18589.3 462.367   2
   4  -2  16 19677.7 484.742   2
  -4   2 -16 20417.0 421.248   3
   4   2  16 19341.1 501.226   1
  -4   2 -17 9645.70 286.946  11
  -4   2 -17 9019.52 320.164  10
   4   2  17 9633.13 311.481  10
   4  -2  17 9714.08 279.388  10
  -4  -2 -17 8322.88 278.679   4
  -4   2 -17 9648.95 235.723   3
   4  -2  17 9152.77 289.411   2
   4   2  17 9192.64 276.684   2
   4   2  17 9441.30 306.886   1
  -4   2 -18 26650.3 607.756  11
   4   2  18 25705.0 634.251  10
   4  -2  18 27522.7 597.772  10
  -4   2 -18 24378.5 648.446  10
  -4  -2 -18 23596.6 597.606   4
   4  -2  18 26526.4 523.052   9
   4  -2  18 25785.2 615.310   2
  -4   2 -18 26735.2 540.611   3
   4   2  18 25072.8 596.079   2
   4   2  18 24334.6 629.255   1
  -4   2 -19 97.5068 46.6756  11
   4   2  19 166.459 58.8914  10
   4  -2  19 106.940 48.2302  10
  -4   2 -19 111.770 59.8619  10
  -4  -2 -19 78.0307 46.6720   4
  -4   2 -19 85.7545 71.9129   5
   4  -2  19 94.8377 27.0379   9
  -4   2 -19 96.8256 29.2415   3
   4  -2  19 83.7267 48.1126   2
   4   2  19 51.0738 47.5202   1
   4   2  19 66.0972 39.3130   2
  -4   2 -20 25529.2 614.220  11
  -4   2 -20 23969.2 661.039  10
   4   2  20 26335.4 643.799  10
   4  -2  20 26092.8 599.549  10
  -4  -2 -20 23601.7 604.227   4
  -4   2 -20 25059.4 722.476   5
   4  -2  20 27069.8 526.687   9
   4  -2  20 26287.5 632.600   2
   4   2  20 25047.5 607.133   2
   4   2  20 26623.5 657.348   1
  -4   2 -21 88.8326 50.7252  11
   4   2  21 66.1486 59.9746  10
   4  -2  21 30.2083 45.6299  10
  -4   2 -21-8.75735 63.4232   5
  -4  -2 -21 93.0284 50.5915   4
  -4  -2 -21 46.9209 67.9625   5
   4  -2  21 51.0552 26.8708   9
   4   2  21 34.4357 47.5292   2
   4   2  21-5.66956 46.7696   1
   4  -2  21-24.1771 46.4179   2
   4   2  22 3705.28 197.210   1
   4  -2  22 3366.22 180.845   1
  -4   2 -22 3840.47 180.023  11
   4   2  22 4178.29 194.063  10
   4  -2  22 3681.21 165.866  10
  -4  -2 -22 3755.36 177.133   4
  -4  -2 -22 3405.34 99.5047   3
  -4   2 -22 3340.36 228.738   5
   4  -2  22 3787.92 118.030   9
   4  -2  22 3788.87 187.006   2
   4   2  22 3452.47 170.199   2
  -4  -2 -22 3200.93 234.697   5
   4  -2  23 114.769 52.5052   1
   4  -2  23 157.002 59.8039   2
   4   2  23 115.909 59.9332   1
  -4   2 -23 43.7616 50.1831  11
   4   2  23 124.336 58.2299  10
   4  -2  23 134.266 52.8210  10
[truncated: 1,034,690 more chars]
